# Supplementary material
Source: PubMed Central journal article supplement (PMC3434529)
Supplement: supp_me.2012-1113_ME-12-1113_supp.pdf [file supp_me.2012-1113_ME-12-1113_supp.pdf]

## Legends for Supplemental Information

**Supplemental Figure 1.** Correlation plots between biological replicates in the samples from  $1\alpha,25(\text{OH})_2\text{D}_3$ -treated zebrafish on day 4.

**Supplemental Figure 2:** Glycine, serine and threonine metabolism pathway is significantly altered by  $1\alpha,25(\text{OH})_2\text{D}_3$  treatment on day 6 (120h of  $1\alpha,25(\text{OH})_2\text{D}_3$  treatment). RNAs increased following  $1\alpha,25(\text{OH})_2\text{D}_3$  treatment (compared with vehicle) are indicated by red “up” arrows, and RNAs decreased following  $1\alpha,25(\text{OH})_2\text{D}_3$  treatment are indicated by blue “down” arrows.

**Supplemental Figure 3:** The fatty acid metabolism pathway is significantly altered by  $1\alpha,25(\text{OH})_2\text{D}_3$  treatment on day 6 (120h of  $1\alpha,25(\text{OH})_2\text{D}_3$  treatment). RNAs increased following  $1\alpha,25(\text{OH})_2\text{D}_3$  treatment (compared with vehicle) are indicated by red “up” arrows, and RNAs decreased following  $1\alpha,25(\text{OH})_2\text{D}_3$  treatment are indicated by blue “down” arrows.

**Supplemental Figure 4:** Retinol metabolism pathway is significantly altered by  $1\alpha,25(\text{OH})_2\text{D}_3$  treatment on day 6 (120h of  $1\alpha,25(\text{OH})_2\text{D}_3$  treatment). RNAs increased following  $1\alpha,25(\text{OH})_2\text{D}_3$  treatment (compared with vehicle) are indicated by red “up” arrows, and RNAs decreased following  $1\alpha,25(\text{OH})_2\text{D}_3$  treatment are indicated by blue “down” arrows.

**Supplemental Figure 5.** Peroxisome proliferator activator receptor pathway is significantly altered by  $1\alpha,25(\text{OH})_2\text{D}_3$  treatment on day 7 (144h of  $1\alpha,25(\text{OH})_2\text{D}_3$  treatment). RNAs increased following  $1\alpha,25(\text{OH})_2\text{D}_3$  treatment (compared with vehicle) are indicated by red “up” arrows, and RNAs decreased following  $1\alpha,25(\text{OH})_2\text{D}_3$  treatment are indicated by blue “down” arrows.

**Supplemental Figure 6:** Drug metabolism pathways are significantly altered by  $1\alpha,25(\text{OH})_2\text{D}_3$  treatment on day 7 (144h of  $1\alpha,25(\text{OH})_2\text{D}_3$  treatment). RNAs increased following  $1\alpha,25(\text{OH})_2\text{D}_3$  treatment (compared with vehicle) are indicated by red “up” arrows, and RNAs decreased following  $1\alpha,25(\text{OH})_2\text{D}_3$  treatment are indicated by blue “down” arrows.

**Supplemental Figure 7:** The fatty acid metabolism pathway is significantly altered by  $1\alpha,25(\text{OH})_2\text{D}_3$  treatment on day 7 (144h of  $1\alpha,25(\text{OH})_2\text{D}_3$  treatment). RNAs increased following  $1\alpha,25(\text{OH})_2\text{D}_3$  treatment (compared with vehicle) are

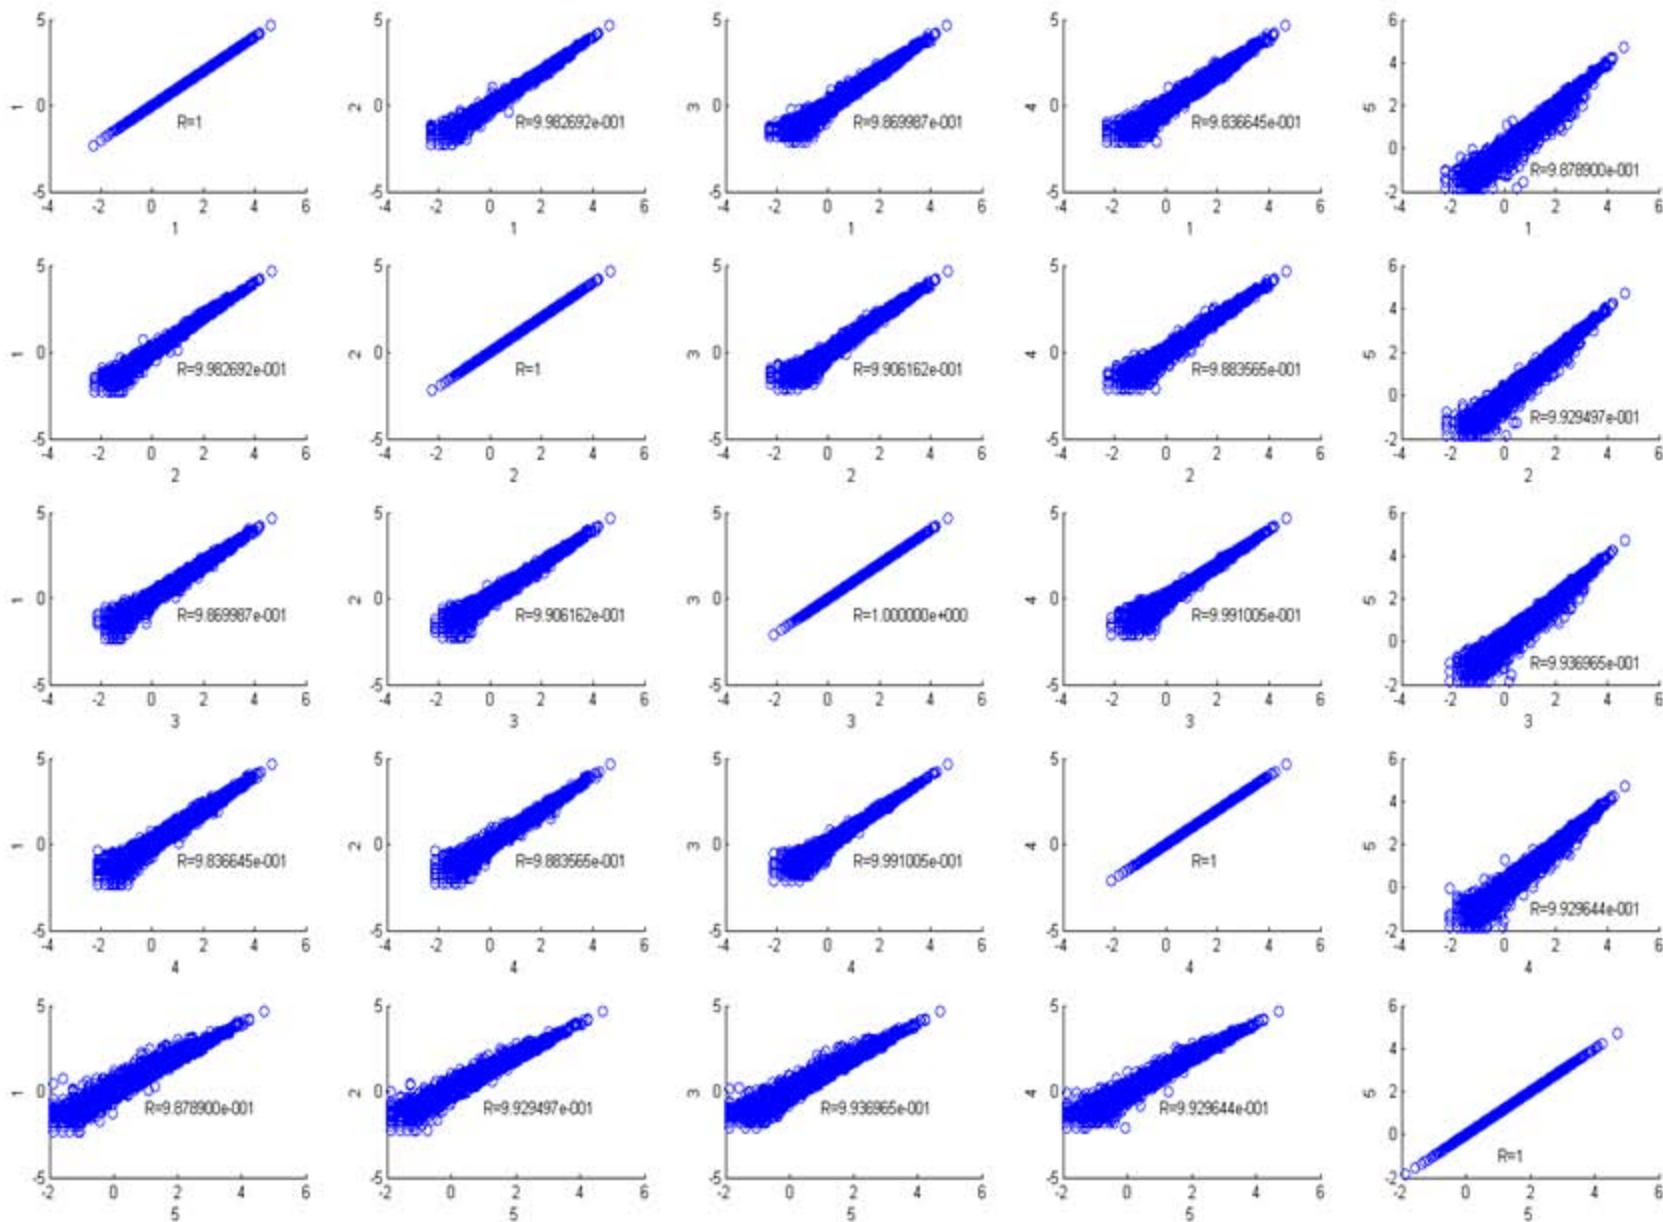

GLYCINE, SERINE AND THREONINE METABOLISM

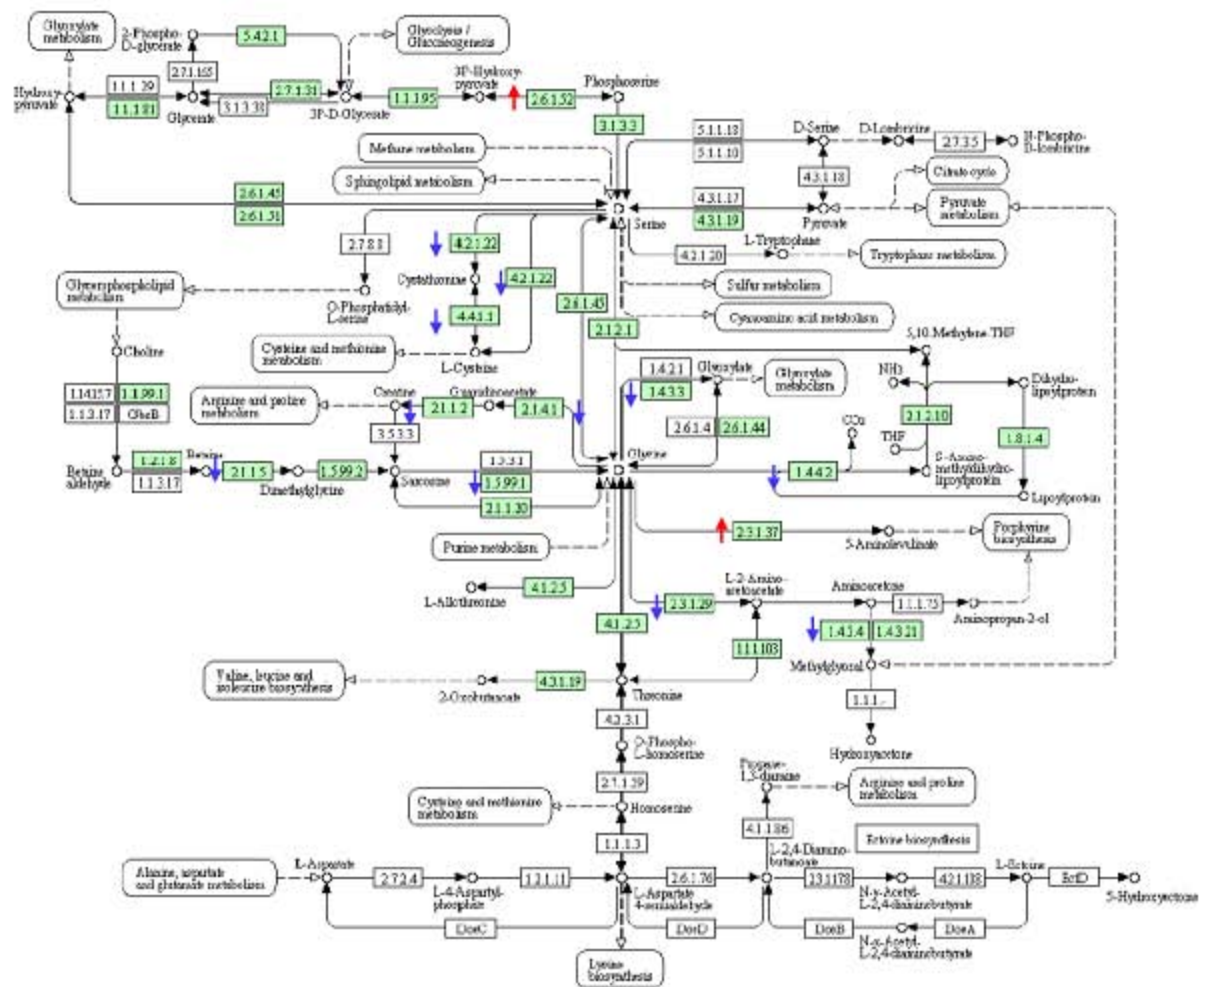

# FATTY ACID METABOLISM

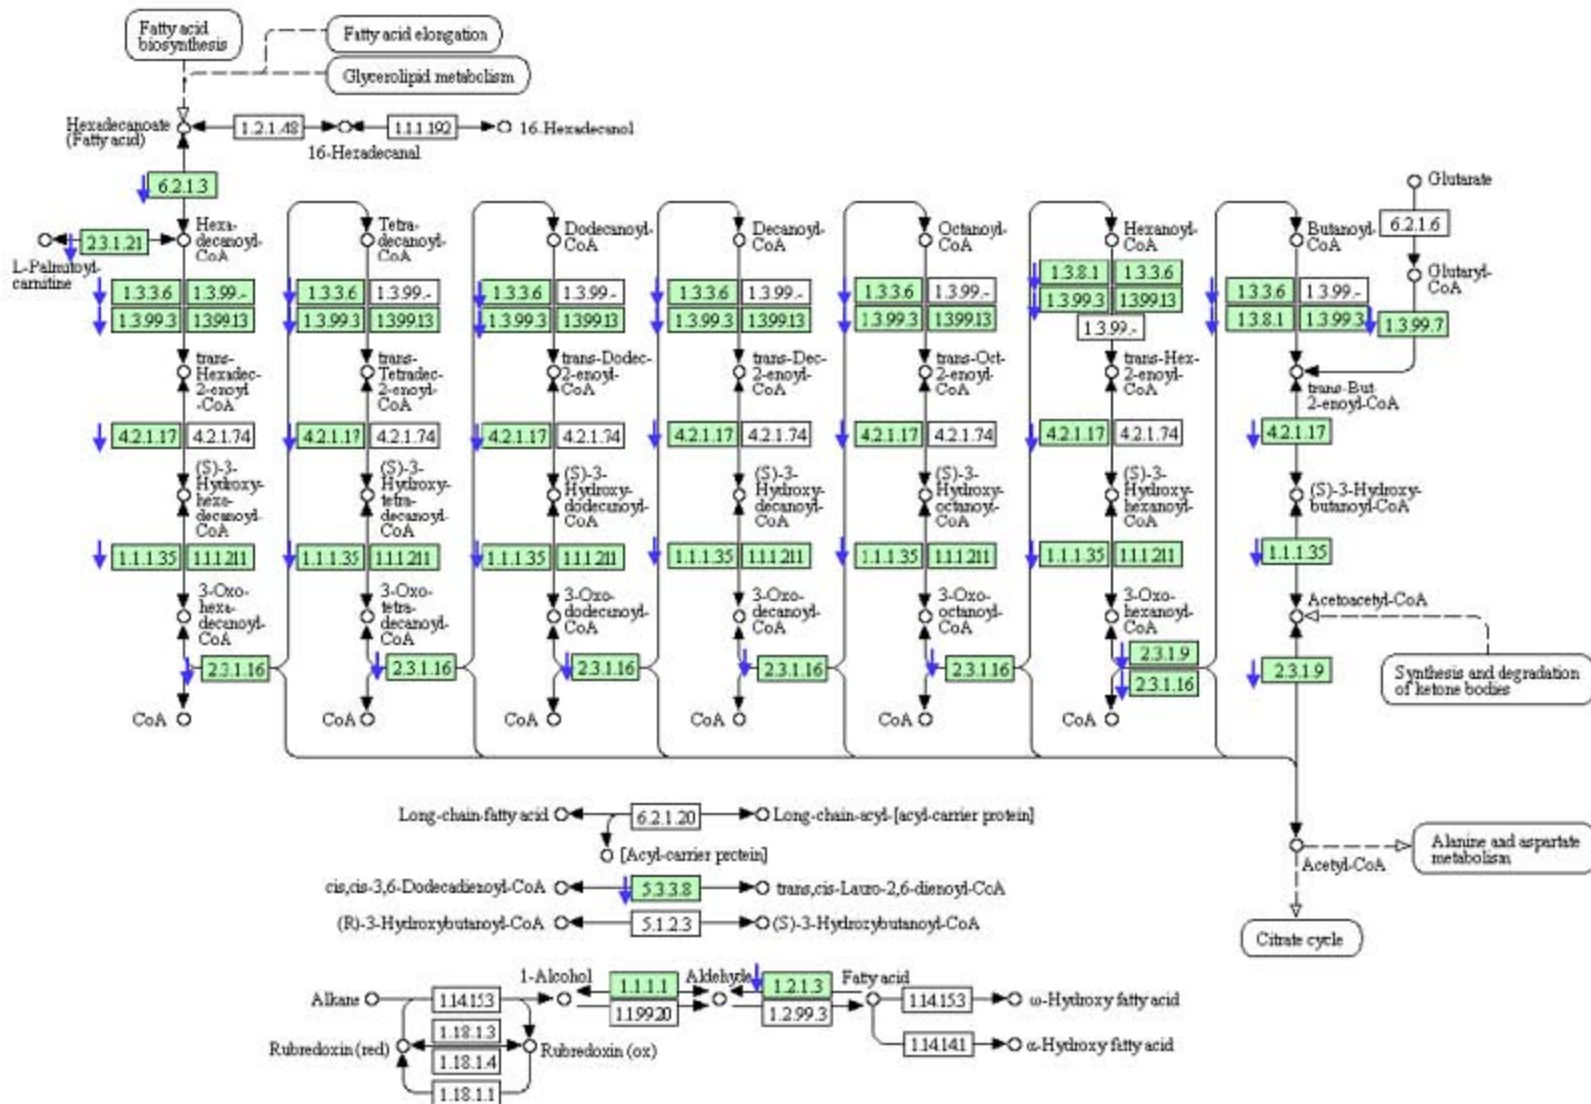

# RETINOL METABOLISM IN ANIMALS

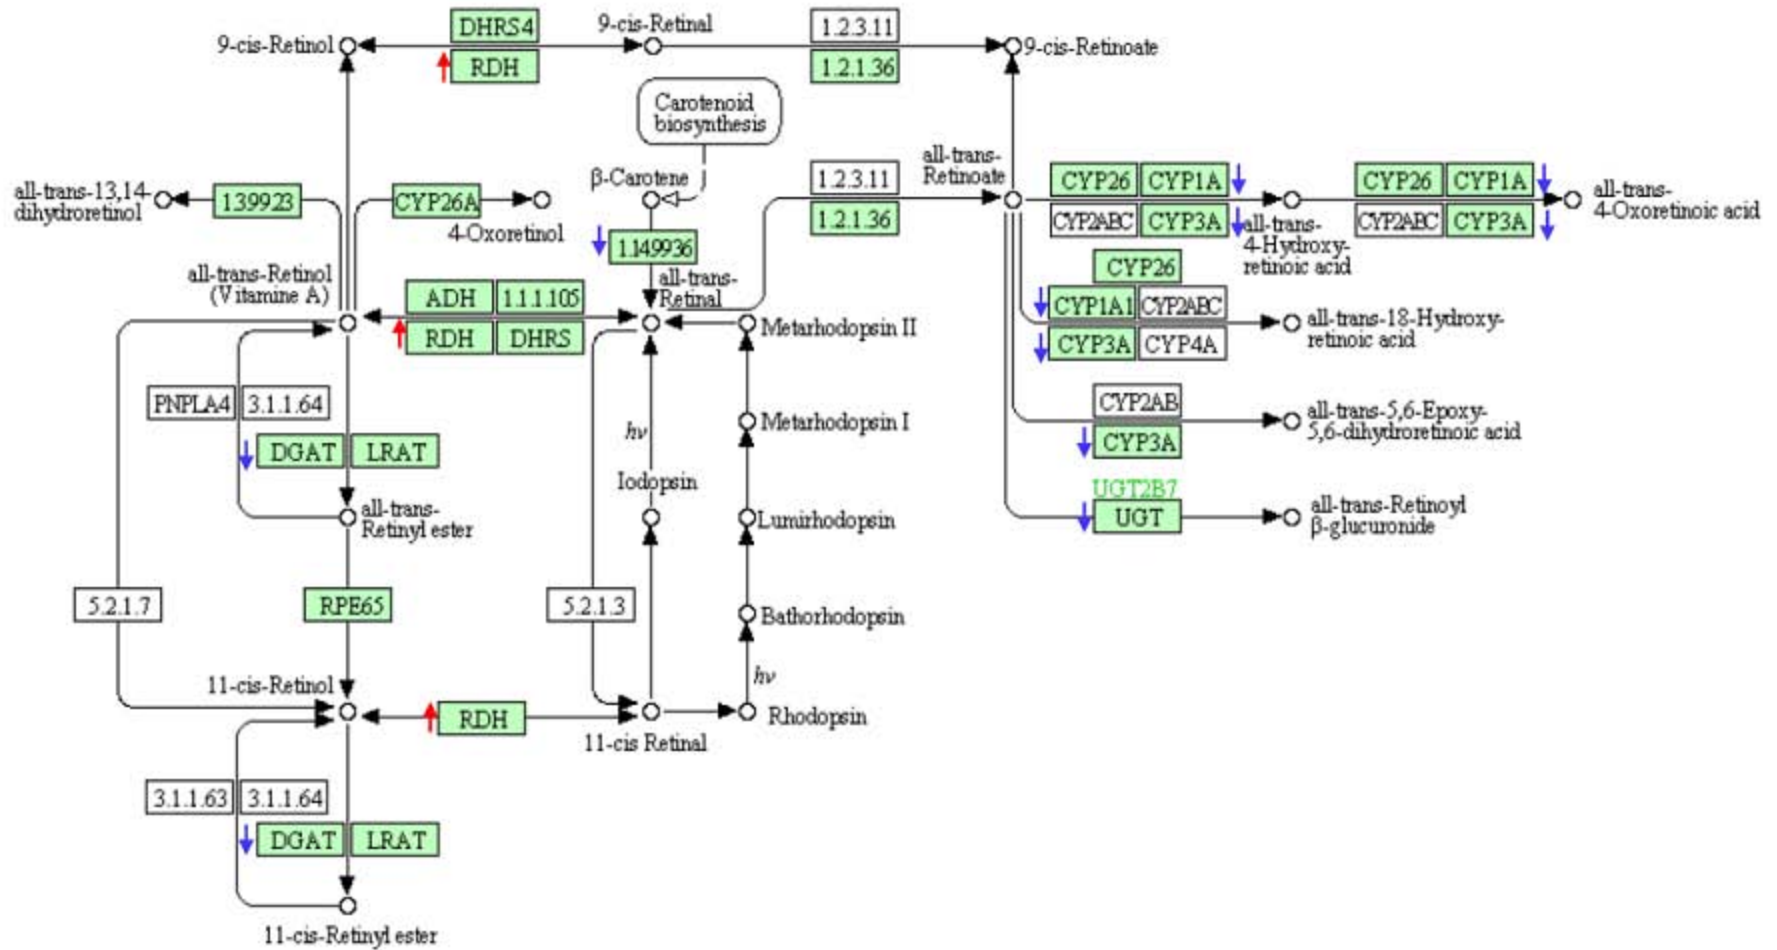

# PPAR SIGNALING PATHWAY

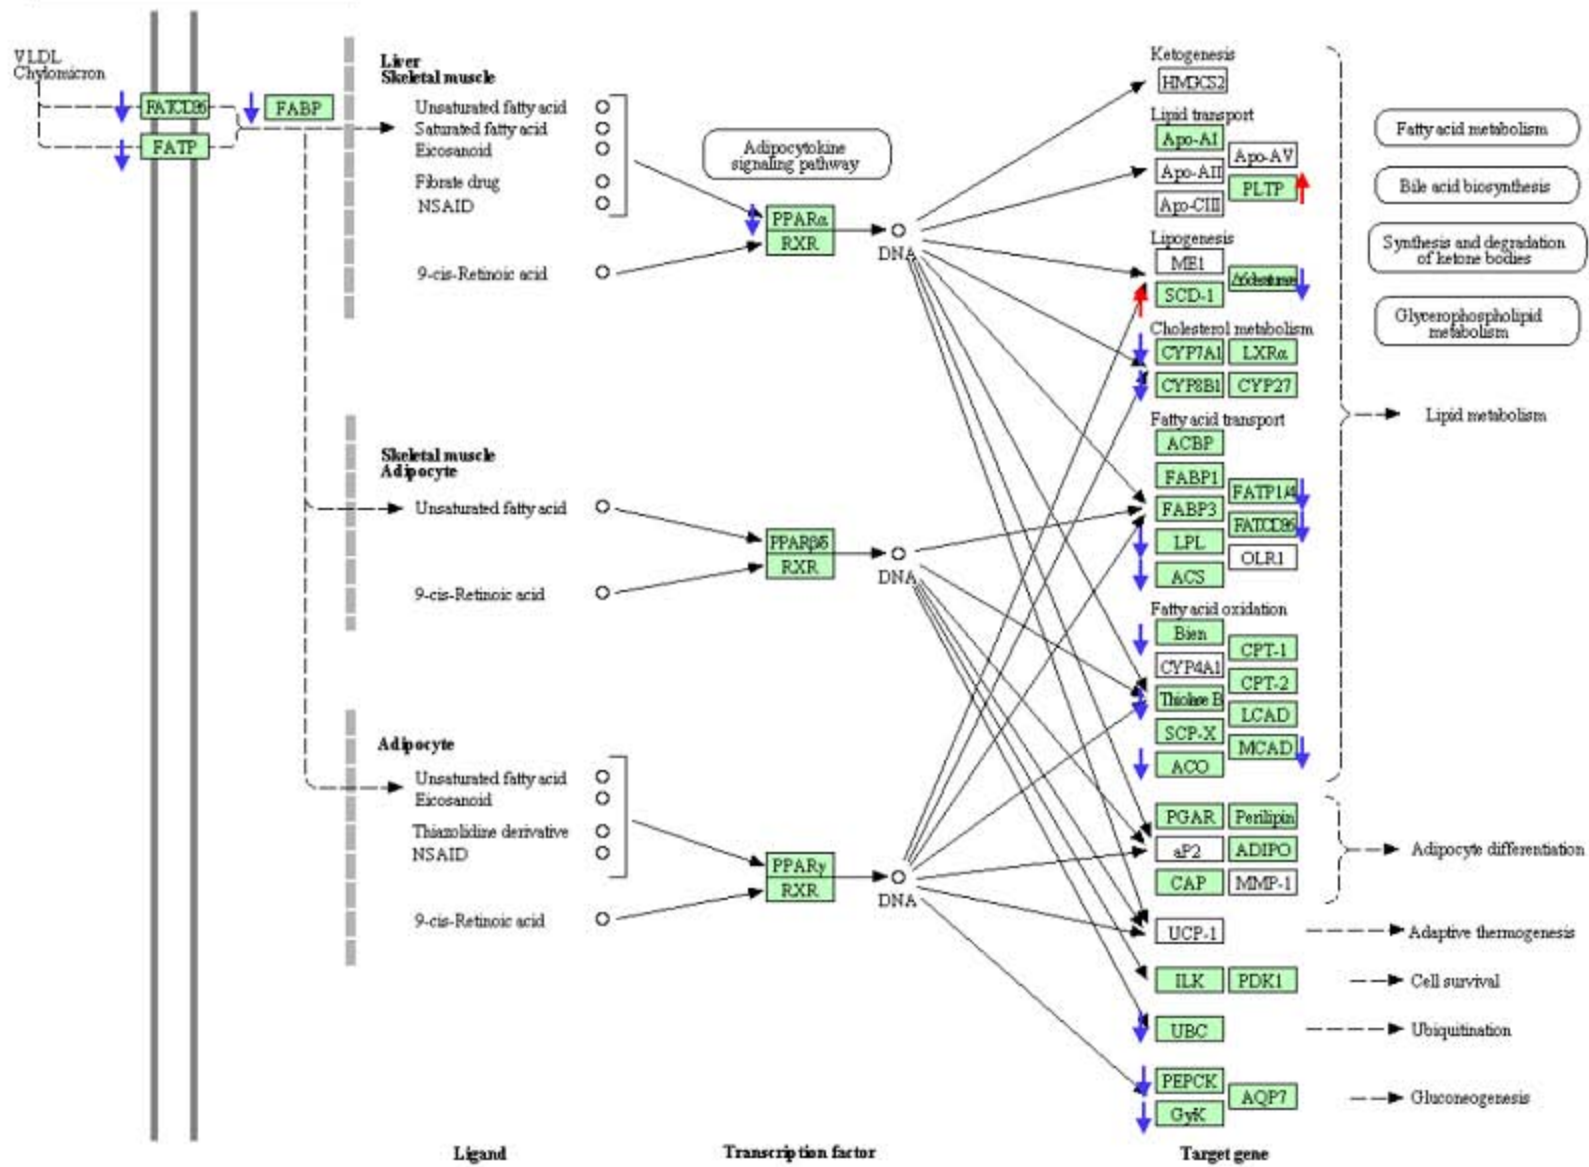

### Cyclophosphamide & Ifosfamide

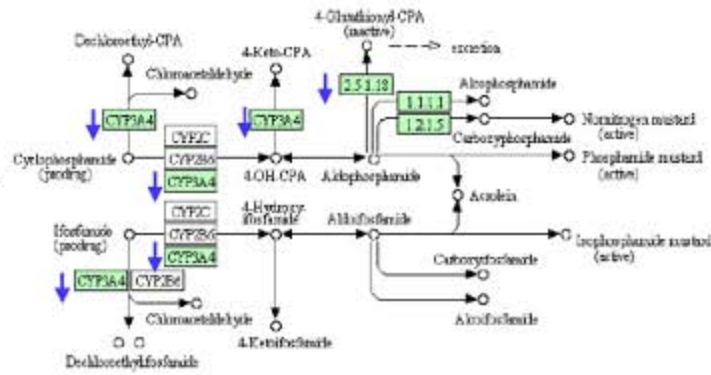

### Citalopram

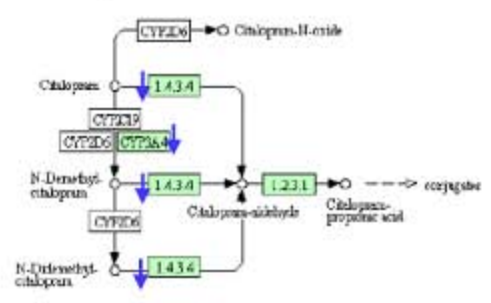

### Tamoxifen

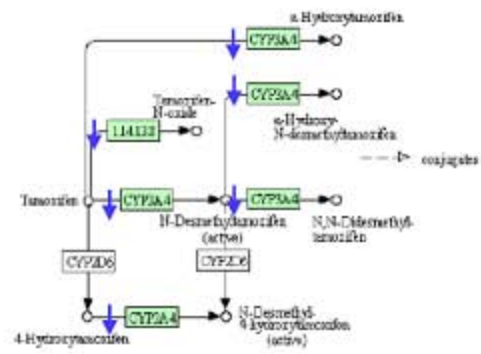

### Codaine & Morphine

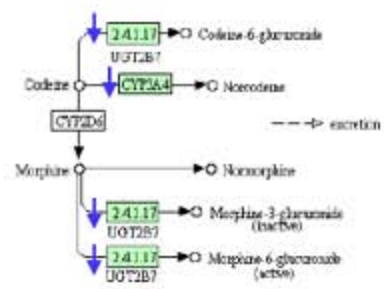

### Metadone

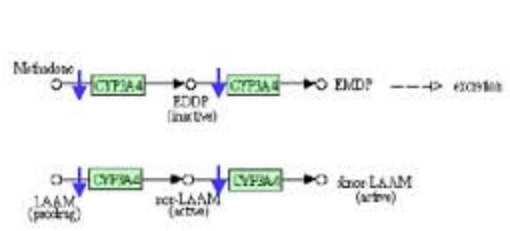

### Lidocaine

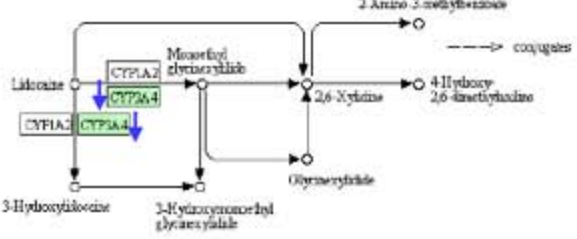

### Felbamate

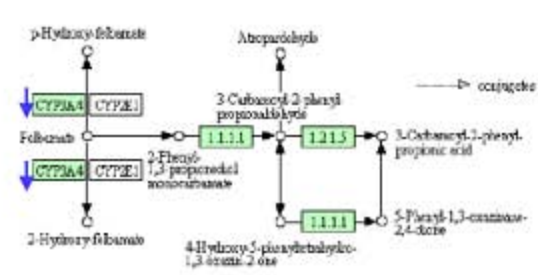

### Carbamazepine & Oxcarbazepine

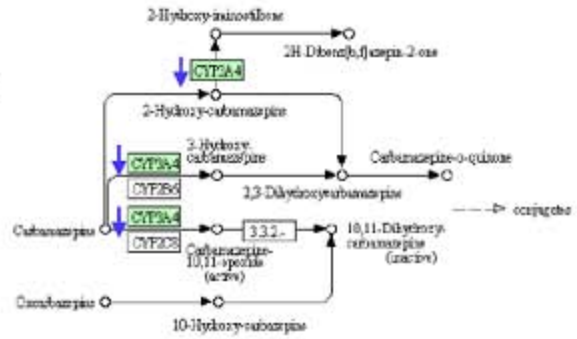

### Valproic acid

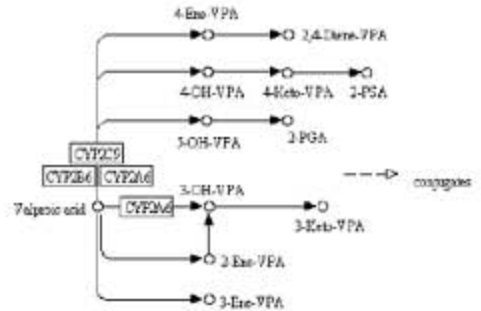

# FATTY ACID METABOLISM

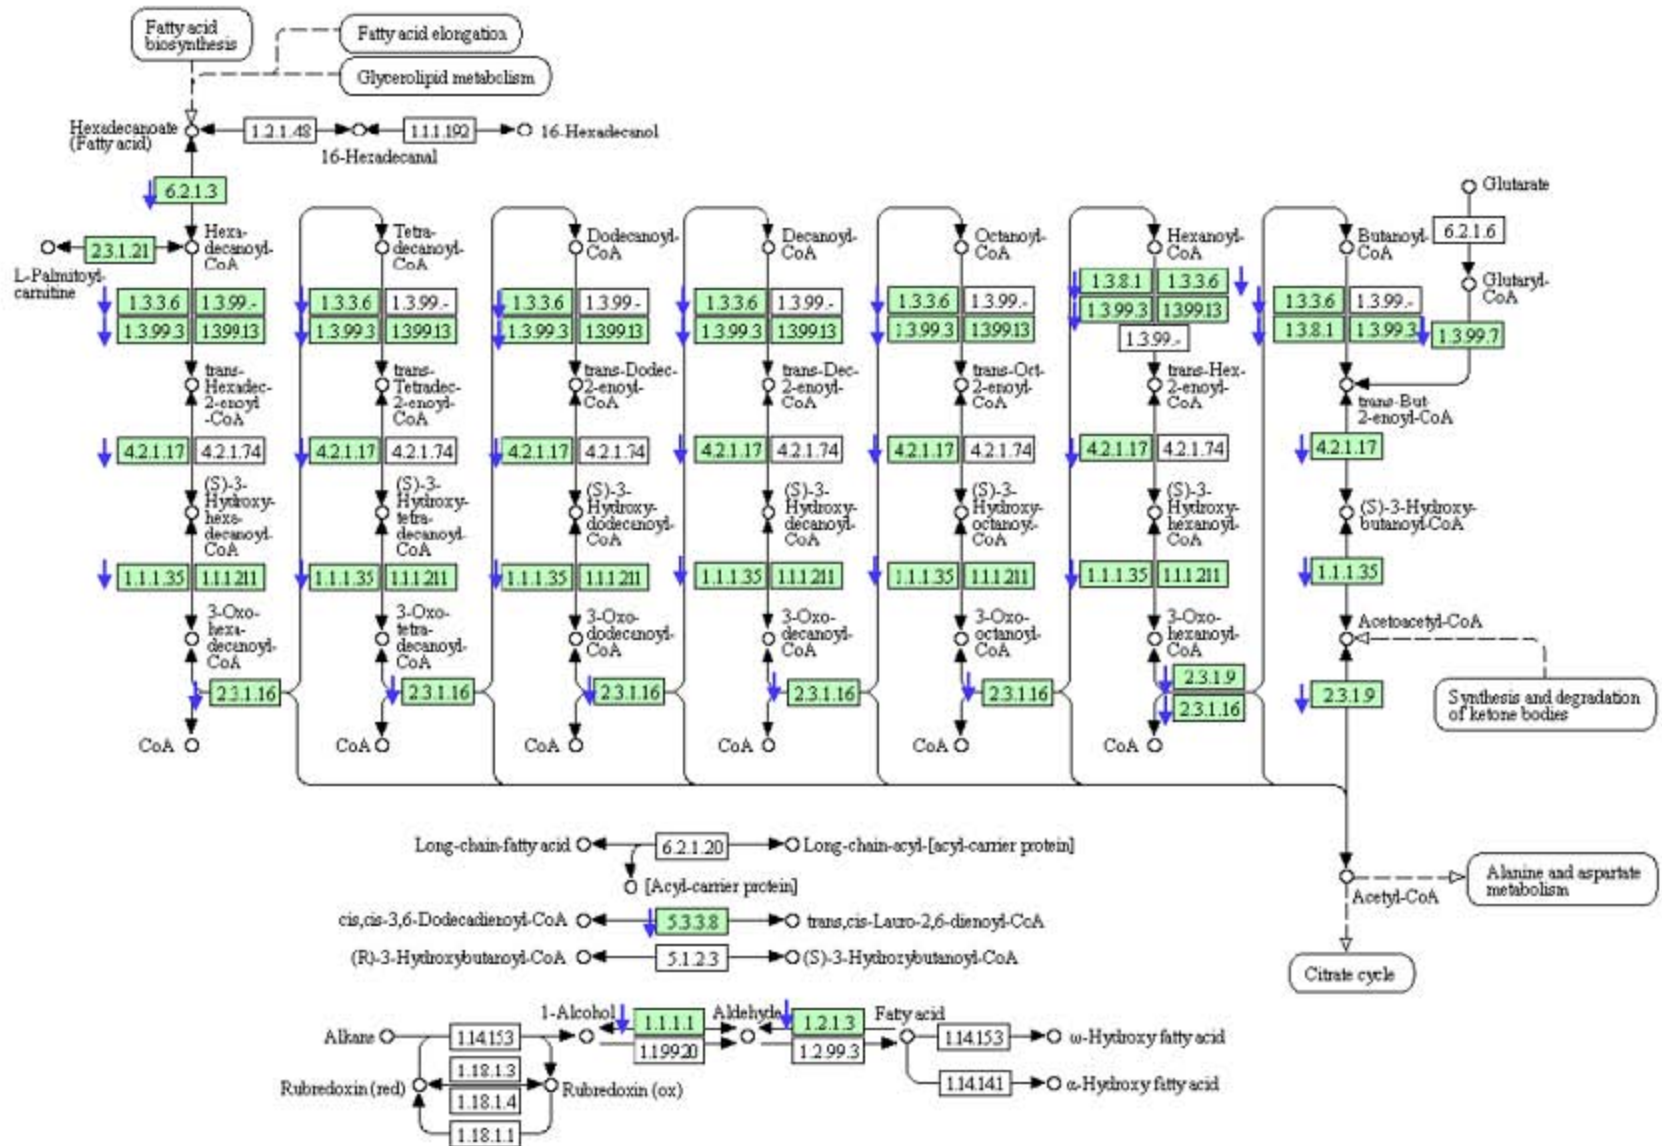





## Supplemental Table Legends

**Supplemental Table 1.** List of genes in Day 4 zebrafish larvae following treatment with  $1\alpha,25(\text{OH})_2\text{D}_3$  or vehicle.

Treatment time = 72 h.

**Supplemental Table 2.** List of genes in Day 6 zebrafish larvae following treatment with  $1\alpha,25(\text{OH})_2\text{D}_3$  or vehicle.

Treatment time = 120 h.

**Supplemental Table 3.** List of genes in Day 7 zebrafish larvae following treatment with  $1\alpha,25(\text{OH})_2\text{D}_3$  or vehicle.

Treatment time = 144 h.

**Supplemental Table 4.** List of genes in Day 7 zebrafish larvae following treatment with  $1\alpha,25(\text{OH})_2\text{D}_3$  or vehicle.

Treatment time = 24 h.

**Supplemental Table 5.** Differentially expressed genes in Day 7 zebrafish larvae following treatment with  $1\alpha,25(\text{OH})_2\text{D}_3$  for 24 h or 144 h.

| Gene Name         | Ethanol-1 | Ethanol-2 | Ethanol-3 | Ethanol-4 | Ethanol-5 | VD-1  | VD-2   | VD-3   |
|-------------------|-----------|-----------|-----------|-----------|-----------|-------|--------|--------|
| cyp24a1           | 10064     | 7687      | 5025      | 5355      | 1216      | 5704  | 37596  | 56659  |
| LOC562139         | 34255     | 13052     | 17218     | 8047      | 544       | 213   | 6334   | 2359   |
| zgc-136461        | 56087     | 21911     | 27510     | 13015     | 998       | 361   | 10678  | 3820   |
| igfbp1b           | 7665      | 5387      | 9621      | 8008      | 1077      | 2869  | 13930  | 19451  |
| zgc-92590         | 1054      | 77        | 248       | 124       | 2         | 14    | 42     | 11     |
| ela2              | 82547     | 45199     | 50022     | 31478     | 2948      | 1692  | 18530  | 11470  |
| zgc-113413        | 5692      | 7099      | 5211      | 6014      | 4264      | 1897  | 2275   | 2710   |
| ela3l             | 64625     | 29180     | 31992     | 19822     | 2481      | 1366  | 15419  | 10462  |
| si-ch211-234p6.12 | 4396      | 3658      | 2333      | 1521      | 450       | 441   | 1281   | 857    |
| zgc-153932        | 2568      | 1951      | 2408      | 1274      | 366       | 850   | 5535   | 4917   |
| tat               | 6029      | 4007      | 3647      | 2683      | 769       | 1909  | 8477   | 9557   |
| zgc-174689        | 5164      | 6487      | 4135      | 4507      | 3874      | 1768  | 2068   | 2508   |
| zgc-92137         | 25875     | 8778      | 8344      | 4962      | 582       | 237   | 6470   | 3912   |
| itln3             | 889       | 1568      | 351       | 224       | 120       | 42    | 356    | 113    |
| klf11a            | 10634     | 10334     | 8995      | 8641      | 3858      | 5352  | 17621  | 26241  |
| amy2a             | 27794     | 12274     | 9635      | 5549      | 782       | 504   | 7967   | 5314   |
| ela2l             | 105311    | 47527     | 54331     | 36807     | 3103      | 1417  | 29381  | 19222  |
| cyt1l             | 200309    | 198406    | 182198    | 180133    | 117268    | 66173 | 91147  | 101743 |
| lpin1             | 33905     | 18051     | 15521     | 11115     | 3937      | 2552  | 13464  | 9044   |
| cpa4              | 19766     | 11604     | 9374      | 6100      | 2021      | 1295  | 6823   | 5976   |
| zgc-114201        | 12990     | 9242      | 8331      | 5648      | 1383      | 1112  | 6060   | 4578   |
| pparaa            | 4965      | 3903      | 4001      | 3724      | 1475      | 920   | 2094   | 1980   |
| zgc-172140        | 89        | 147       | 161       | 69        | 7         | 74    | 298    | 292    |
| cish              | 5488      | 2536      | 1648      | 1116      | 398       | 329   | 1956   | 1449   |
| LOC568900         | 13496     | 6612      | 5937      | 5096      | 546       | 355   | 4502   | 3399   |
| pnp4b             | 12823     | 6930      | 5592      | 3671      | 360       | 286   | 4671   | 3358   |
| igfbp1a           | 12971     | 8603      | 9152      | 9293      | 1638      | 2964  | 12574  | 16544  |
| zgc-194221        | 89        | 66        | 113       | 80        | 34        | 0     | 9      | 13     |
| slc25a29          | 3410      | 2829      | 2138      | 1772      | 605       | 427   | 1657   | 1084   |
| he1a              | 389       | 647       | 0         | 145       | 1391      | 1027  | 6      | 7      |
| slc34a2a          | 8061      | 3704      | 3794      | 2343      | 619       | 525   | 3118   | 2457   |
| tfa               | 263278    | 194264    | 151037    | 126607    | 51690     | 41578 | 112484 | 119857 |
| tfcp2l1           | 988       | 846       | 605       | 527       | 118       | 84    | 408    | 376    |
| sult1st6          | 3110      | 2352      | 1641      | 1485      | 404       | 335   | 1417   | 1419   |
| elna              | 3777      | 4039      | 4214      | 4231      | 2179      | 3274  | 5382   | 6478   |
| bcl6ab            | 3501      | 3747      | 2413      | 2352      | 1593      | 1691  | 4933   | 6722   |
| cpa5              | 125680    | 67069     | 63958     | 48518     | 9472      | 5991  | 49563  | 39668  |
| fabp11b           | 687       | 673       | 532       | 504       | 627       | 636   | 1210   | 1659   |
| rh50              | 1036      | 399       | 495       | 253       | 22        | 8     | 318    | 204    |
| zgc-154142        | 11382     | 4606      | 4538      | 2412      | 507       | 467   | 4039   | 3221   |
| stc2              | 2563      | 2166      | 1607      | 1468      | 963       | 815   | 1210   | 1191   |
| fabp10a           | 36685     | 22486     | 12540     | 11585     | 4214      | 3639  | 16596  | 12078  |
| fep15             | 9203      | 5943      | 4940      | 4424      | 1256      | 843   | 4046   | 3457   |
| sc4mol            | 7822      | 4158      | 3941      | 2986      | 332       | 463   | 2483   | 3553   |
| fosb              | 1166      | 307       | 426       | 759       | 35        | 54    | 333    | 279    |
| ctrl              | 93110     | 49248     | 52204     | 39090     | 7339      | 5289  | 36311  | 26634  |
| rrm2              | 5760      | 5556      | 2878      | 2545      | 1602      | 2525  | 7086   | 9751   |
| cyp2ad2           | 7731      | 2939      | 2168      | 1528      | 297       | 222   | 2773   | 2051   |
| c3b               | 14479     | 11015     | 9470      | 7003      | 1998      | 2286  | 7965   | 5598   |
| zgc-56382         | 13291     | 10179     | 11648     | 8072      | 2831      | 4135  | 17140  | 14580  |

|                   |        |        |        |        |       |       |       |       |
|-------------------|--------|--------|--------|--------|-------|-------|-------|-------|
| zgc-111983        | 15744  | 12123  | 13145  | 9396   | 3501  | 5171  | 20238 | 17065 |
| zgc-92851         | 1083   | 539    | 645    | 2234   | 194   | 256   | 461   | 606   |
| zgc-172079        | 6923   | 4545   | 3801   | 2602   | 1280  | 1138  | 3148  | 3074  |
| ldlr              | 14150  | 9123   | 8940   | 7014   | 1615  | 1603  | 6371  | 6407  |
| habp2             | 2937   | 1968   | 1592   | 1171   | 307   | 385   | 1223  | 1041  |
| si-dkey-22i16.3   | 5689   | 6289   | 6173   | 6385   | 2857  | 3692  | 7357  | 10111 |
| c6ast4            | 31939  | 15084  | 16697  | 9168   | 768   | 930   | 13627 | 11231 |
| zgc-92041         | 222693 | 136352 | 144624 | 107812 | 18144 | 10266 | 94794 | 72804 |
| cfhl1             | 442    | 354    | 387    | 343    | 96    | 88    | 210   | 170   |
| abcg4b            | 377    | 357    | 212    | 234    | 137   | 225   | 474   | 761   |
| pmelb             | 14237  | 13797  | 9733   | 9978   | 8037  | 9168  | 20055 | 24673 |
| LOC563738         | 5737   | 4463   | 3194   | 3064   | 1183  | 1351  | 2531  | 3029  |
| si-dkey-31f5.1    | 8501   | 5031   | 4721   | 2965   | 954   | 933   | 3511  | 3207  |
| dpys              | 5132   | 3772   | 2582   | 2555   | 1017  | 884   | 2527  | 2486  |
| vdrb              | 5445   | 4741   | 2710   | 2415   | 1439  | 997   | 3160  | 2444  |
| zgc-136854        | 14     | 3      | 0      | 2      | 5     | 3     | 33    | 45    |
| si-ch211-203l9.3  | 3718   | 3645   | 2949   | 3585   | 1136  | 668   | 2316  | 1583  |
| si-ch73-252g14.4  | 2563   | 1083   | 1476   | 735    | 171   | 90    | 816   | 861   |
| klf11b            | 6573   | 6013   | 5324   | 5998   | 2203  | 2730  | 7599  | 10861 |
| si-dkey-61p9.11   | 155    | 306    | 190    | 42     | 54    | 75    | 476   | 283   |
| si-ch211-284e20.8 | 6295   | 5057   | 3648   | 3997   | 1340  | 1440  | 2816  | 3516  |
| vdra              | 2904   | 2609   | 2535   | 2451   | 893   | 520   | 1579  | 1104  |
| rhcg1             | 3650   | 3108   | 2041   | 1728   | 305   | 401   | 5317  | 3956  |
| zgc-112282        | 3951   | 2078   | 1186   | 738    | 166   | 188   | 1613  | 1275  |
| hspb9             | 5800   | 3153   | 1666   | 1170   | 738   | 1122  | 5204  | 5965  |
| psat1             | 7540   | 9814   | 4726   | 5443   | 4431  | 6473  | 9566  | 14528 |
| zgc-165502        | 4201   | 2766   | 3252   | 2311   | 551   | 628   | 1848  | 1753  |

| VD-4  | VD-5  | foldChang | pval     | padj     |
|-------|-------|-----------|----------|----------|
| 37201 | 45378 | 7.242867  | 6.35E-61 | 8.89E-57 |
| 2297  | 2482  | 0.220876  | 5.96E-44 | 4.17E-40 |
| 3546  | 3853  | 0.218593  | 2.66E-42 | 1.24E-38 |
| 35962 | 35648 | 4.088364  | 3.78E-32 | 1.32E-28 |
| 0     | 29    | 0.087832  | 4.21E-27 | 1.18E-23 |
| 13991 | 16192 | 0.357113  | 2.47E-22 | 5.76E-19 |
| 791   | 1460  | 0.358294  | 1.69E-21 | 3.39E-18 |
| 8563  | 9001  | 0.361608  | 2.47E-21 | 3.76E-18 |
| 361   | 652   | 0.355977  | 2.69E-21 | 3.76E-18 |
| 4278  | 5403  | 2.828004  | 2.43E-21 | 3.76E-18 |
| 10357 | 11125 | 2.938766  | 7.54E-21 | 9.60E-18 |
| 608   | 1160  | 0.372568  | 6.24E-20 | 7.28E-17 |
| 3163  | 3857  | 0.443534  | 9.01E-17 | 9.71E-14 |
| 78    | 122   | 0.268586  | 2.96E-16 | 2.96E-13 |
| 16592 | 21261 | 2.252876  | 3.83E-14 | 3.58E-11 |
| 3677  | 5651  | 0.503531  | 1.19E-12 | 1.05E-09 |
| 23943 | 25892 | 0.495826  | 4.39E-12 | 3.62E-09 |
| 62219 | 69261 | 0.503619  | 7.04E-11 | 5.48E-08 |
| 4892  | 6003  | 0.505861  | 8.85E-11 | 6.53E-08 |
| 3577  | 4278  | 0.530239  | 1.82E-10 | 1.27E-07 |
| 2648  | 3332  | 0.545415  | 2.10E-09 | 1.40E-06 |
| 1696  | 1816  | 0.547814  | 2.70E-09 | 1.72E-06 |
| 360   | 297   | 3.383745  | 3.03E-09 | 1.85E-06 |
| 548   | 682   | 0.523096  | 3.39E-09 | 1.98E-06 |
| 3297  | 3844  | 0.591077  | 1.06E-08 | 5.93E-06 |
| 2702  | 3501  | 0.599032  | 2.79E-08 | 1.51E-05 |
| 16880 | 18587 | 1.930817  | 3.43E-08 | 1.78E-05 |
| 22    | 14    | 0.168922  | 5.80E-08 | 2.90E-05 |
| 802   | 1181  | 0.563164  | 7.15E-08 | 3.45E-05 |
| 8     | 51    | 0.594093  | 7.95E-08 | 3.59E-05 |
| 1394  | 1729  | 0.586784  | 7.85E-08 | 3.59E-05 |
| 47666 | 71230 | 0.5748    | 9.61E-08 | 4.08E-05 |
| 101   | 216   | 0.429284  | 9.52E-08 | 4.08E-05 |
| 465   | 594   | 0.530002  | 1.14E-07 | 4.70E-05 |
| 5469  | 7938  | 1.741749  | 1.55E-07 | 6.21E-05 |
| 3207  | 4227  | 1.642792  | 2.58E-07 | 9.97E-05 |
| 27067 | 34049 | 0.581819  | 2.63E-07 | 9.97E-05 |
| 785   | 829   | 1.711324  | 5.06E-07 | 0.000182 |
| 100   | 180   | 0.422259  | 5.03E-07 | 0.000182 |
| 1964  | 2587  | 0.630744  | 6.20E-07 | 0.000217 |
| 461   | 719   | 0.587003  | 8.07E-07 | 0.000276 |
| 6013  | 7282  | 0.6163    | 1.32E-06 | 0.000439 |
| 2487  | 3035  | 0.629912  | 1.79E-06 | 0.000582 |
| 1485  | 2302  | 0.627279  | 2.16E-06 | 0.000688 |
| 192   | 258   | 0.491255  | 2.32E-06 | 0.000721 |
| 25308 | 32324 | 0.626997  | 2.51E-06 | 0.000765 |
| 3431  | 3610  | 1.600788  | 3.94E-06 | 0.001175 |
| 1329  | 1425  | 0.644863  | 4.17E-06 | 0.001216 |
| 3619  | 4526  | 0.646717  | 4.35E-06 | 0.001244 |
| 13984 | 17464 | 1.693361  | 5.01E-06 | 0.001403 |

|       |       |          |          |          |
|-------|-------|----------|----------|----------|
| 16125 | 20196 | 1.694319 | 6.01E-06 | 0.001621 |
| 418   | 551   | 0.561058 | 6.02E-06 | 0.001621 |
| 1370  | 1855  | 0.644065 | 7.63E-06 | 0.002016 |
| 3392  | 4899  | 0.645655 | 8.78E-06 | 0.002278 |
| 621   | 871   | 0.629058 | 9.00E-06 | 0.002292 |
| 7788  | 10171 | 1.59307  | 9.29E-06 | 0.002323 |
| 6718  | 7876  | 0.642659 | 1.08E-05 | 0.002643 |
| 75260 | 93720 | 0.655607 | 1.26E-05 | 0.003045 |
| 115   | 71    | 0.470725 | 1.40E-05 | 0.003313 |
| 298   | 550   | 1.948714 | 1.63E-05 | 0.003816 |
| 11858 | 13783 | 1.525965 | 1.92E-05 | 0.004397 |
| 1361  | 1689  | 0.671117 | 1.99E-05 | 0.004504 |
| 2027  | 2942  | 0.681271 | 2.32E-05 | 0.005162 |
| 1218  | 1380  | 0.65387  | 2.72E-05 | 0.005847 |
| 1225  | 1683  | 0.650174 | 2.76E-05 | 0.005847 |
| 22    | 37    | 6.001357 | 2.70E-05 | 0.005847 |
| 1681  | 2283  | 0.653488 | 2.87E-05 | 0.005911 |
| 742   | 611   | 0.616764 | 2.86E-05 | 0.005911 |
| 6492  | 8395  | 1.530532 | 3.14E-05 | 0.00629  |
| 308   | 274   | 2.181968 | 3.12E-05 | 0.00629  |
| 1686  | 2240  | 0.677538 | 3.49E-05 | 0.006875 |
| 1430  | 1788  | 0.659446 | 3.79E-05 | 0.00737  |
| 2114  | 3104  | 1.557107 | 4.29E-05 | 0.008174 |
| 679   | 589   | 0.643904 | 4.32E-05 | 0.008174 |
| 2263  | 2536  | 1.582671 | 4.84E-05 | 0.009    |
| 5160  | 8227  | 1.520551 | 4.88E-05 | 0.009    |
| 1648  | 1584  | 0.688154 | 5.27E-05 | 0.00958  |

| Gene Name         | Ethanol-1 | Ethanol-2 | Ethanol-3 | Ethanol-4 | Ethanol-5 | VD-1  | VD-2   | VD-3   |
|-------------------|-----------|-----------|-----------|-----------|-----------|-------|--------|--------|
| cyp24a1           | 39899     | 31619     | 26113     | 21850     | 6307      | 43718 | 241617 | 185018 |
| zgc-92590         | 2725      | 2278      | 3002      | 3582      | 569       | 28    | 269    | 123    |
| igfbp1b           | 25774     | 27941     | 27537     | 27527     | 5527      | 32010 | 176932 | 140394 |
| zgc-113413        | 1276      | 2330      | 1511      | 1388      | 993       | 160   | 112    | 138    |
| ces3              | 6324      | 9622      | 7135      | 7148      | 1977      | 1176  | 1046   | 1371   |
| zgc-174689        | 1186      | 2095      | 1327      | 1177      | 852       | 143   | 106    | 129    |
| klf11a            | 3630      | 6315      | 6248      | 5418      | 2842      | 9203  | 29305  | 24979  |
| zgc-154142        | 15372     | 22683     | 19542     | 16927     | 4894      | 2066  | 3987   | 4226   |
| c3b               | 9970      | 20194     | 16338     | 13831     | 4409      | 1853  | 4522   | 2850   |
| ahsg              | 4670      | 5152      | 5166      | 4449      | 1444      | 620   | 871    | 672    |
| hsp70l            | 250       | 582       | 403       | 530       | 649       | 260   | 2102   | 615    |
| fabp1b.1          | 8459      | 13304     | 11485     | 14526     | 11007     | 4983  | 2114   | 2459   |
| rh50              | 1914      | 2508      | 2285      | 2075      | 797       | 236   | 420    | 315    |
| cyt1l             | 164218    | 234502    | 179875    | 177209    | 68589     | 25964 | 32807  | 46508  |
| zgc-112992        | 774       | 1378      | 1095      | 1099      | 798       | 314   | 134    | 145    |
| si-ch211-234p6.12 | 8011      | 8155      | 7068      | 5219      | 3315      | 1440  | 1986   | 1473   |
| tfa               | 106074    | 214779    | 175398    | 153969    | 90677     | 32656 | 49814  | 36350  |
| si-dkey-14d8.7    | 1141      | 1605      | 1197      | 1121      | 284       | 53    | 240    | 144    |
| LOC562139         | 88799     | 113643    | 114736    | 82095     | 22609     | 5499  | 30700  | 17927  |
| opn1mw1           | 46802     | 69702     | 64926     | 58368     | 33435     | 19822 | 14773  | 14573  |
| cyp4v2            | 8320      | 9844      | 7366      | 7844      | 2887      | 1462  | 2605   | 2569   |
| ugt1a5            | 6011      | 8169      | 6534      | 6292      | 3643      | 1892  | 1866   | 2165   |
| zgc-136461        | 143551    | 185929    | 185384    | 131785    | 36859     | 9505  | 51018  | 29800  |
| itln3             | 335       | 4513      | 3049      | 1762      | 474       | 14    | 1239   | 911    |
| cyp2ad2           | 11078     | 17699     | 14047     | 10640     | 3577      | 1872  | 4393   | 4749   |
| ugt1ab            | 7892      | 10617     | 8302      | 8007      | 4059      | 2328  | 2691   | 2988   |
| ugt1a1            | 9189      | 12262     | 9792      | 9181      | 5259      | 3124  | 3117   | 3404   |
| ugt1a2            | 5800      | 7845      | 6176      | 5965      | 3447      | 1907  | 1905   | 2193   |
| ugt1a6            | 5636      | 7540      | 6002      | 5776      | 3397      | 1843  | 1855   | 2134   |
| ugt1a7            | 6562      | 8757      | 7286      | 6660      | 4077      | 2223  | 2216   | 2531   |
| fabp10a           | 75018     | 91613     | 72515     | 62681     | 30768     | 17490 | 22185  | 18483  |
| ugt1a4            | 5952      | 8154      | 6506      | 6162      | 3655      | 1992  | 2025   | 2324   |
| habp2             | 2488      | 3853      | 3463      | 3025      | 1635      | 978   | 906    | 784    |
| fabp2             | 45641     | 60119     | 49820     | 45567     | 25639     | 14510 | 15245  | 14772  |
| f7i               | 1630      | 2263      | 2346      | 1786      | 921       | 495   | 505    | 435    |
| zgc-161979        | 20368     | 34024     | 29578     | 28779     | 13945     | 7185  | 8244   | 9533   |
| elna              | 1277      | 2316      | 2320      | 2059      | 873       | 2299  | 6071   | 5271   |
| zgc-153932        | 2442      | 4064      | 2357      | 2588      | 3504      | 5714  | 9515   | 8425   |
| ela3l             | 197407    | 245495    | 225166    | 163390    | 48227     | 15101 | 65354  | 46232  |
| zgc-172140        | 63        | 163       | 64        | 59        | 207       | 608   | 701    | 303    |
| cyp2k18           | 1213      | 1644      | 1527      | 1095      | 420       | 209   | 288    | 308    |
| dpys              | 3950      | 5151      | 4775      | 4533      | 1720      | 1199  | 1297   | 1383   |
| tat               | 40891     | 30646     | 27902     | 24009     | 6557      | 23709 | 99622  | 90206  |
| zgc-194887        | 1285      | 1923      | 1910      | 2244      | 520       | 274   | 456    | 464    |
| pklr              | 70466     | 76848     | 79732     | 79189     | 33990     | 10110 | 21919  | 17702  |
| comtd1            | 848       | 1284      | 1255      | 1565      | 633       | 367   | 368    | 316    |
| ela2              | 220364    | 262404    | 266491    | 179293    | 52984     | 15870 | 81182  | 48117  |
| zgc-112146        | 1289      | 2188      | 1529      | 1540      | 709       | 312   | 510    | 430    |
| zgc-92137         | 78420     | 107114    | 91328     | 61669     | 16945     | 7472  | 27977  | 28542  |
| LOC570613         | 2604      | 4001      | 3828      | 3370      | 1784      | 1027  | 1097   | 1115   |

|                   |        |        |        |        |        |        |        |        |
|-------------------|--------|--------|--------|--------|--------|--------|--------|--------|
| ins               | 1873   | 2612   | 2394   | 2063   | 703    | 382    | 691    | 695    |
| opn1sw2           | 59891  | 81512  | 75012  | 64155  | 25470  | 20597  | 24797  | 27204  |
| zgc-136854        | 14     | 80     | 13     | 3      | 31     | 85     | 309    | 97     |
| zgc-172225        | 1477   | 2069   | 1454   | 1639   | 211    | 220    | 457    | 502    |
| si-ch211-234p6.13 | 1455   | 2035   | 1420   | 1626   | 203    | 213    | 454    | 498    |
| ebi3              | 626    | 1034   | 880    | 983    | 514    | 117    | 200    | 265    |
| zgc-165502        | 3809   | 4656   | 5217   | 4851   | 2990   | 1334   | 1491   | 1304   |
| he1a              | 2      | 282    | 12     | 30     | 255    | 21     | 7      | 1      |
| igfbp1a           | 18728  | 23736  | 22992  | 25098  | 7999   | 13749  | 64860  | 52424  |
| agxt2l1           | 6297   | 8435   | 7432   | 6536   | 2573   | 1694   | 2651   | 2699   |
| slc1a4            | 1723   | 2800   | 2489   | 2190   | 997    | 1580   | 6623   | 4243   |
| cyp2y3            | 12511  | 16623  | 13523  | 10199  | 4497   | 2915   | 5082   | 5169   |
| elovl2            | 1840   | 2528   | 2141   | 2244   | 714    | 359    | 658    | 596    |
| gip               | 540609 | 720189 | 700685 | 772883 | 377301 | 258735 | 230316 | 199454 |
| cyp2x9            | 2833   | 3707   | 2882   | 2518   | 1127   | 909    | 1089   | 1060   |
| zgc-110377        | 3418   | 5013   | 3711   | 3163   | 1198   | 1081   | 1560   | 1478   |
| adm2              | 278    | 573    | 518    | 503    | 174    | 389    | 1994   | 1592   |
| zgc-171537        | 1343   | 1803   | 1248   | 1301   | 142    | 190    | 340    | 658    |
| si-ch73-46j18.5   | 5151   | 7284   | 6454   | 5939   | 1642   | 3969   | 17876  | 14926  |
| zgc-110064        | 24256  | 47385  | 41772  | 42997  | 19083  | 17081  | 11695  | 18889  |
| aldh1l1           | 14112  | 16762  | 12227  | 10685  | 4968   | 3164   | 5802   | 5452   |
| hspb9             | 2402   | 3797   | 3051   | 2457   | 554    | 1016   | 8997   | 7511   |
| asah2             | 12477  | 15912  | 12333  | 9501   | 3909   | 2833   | 5252   | 4565   |
| opn1lw2           | 51101  | 68567  | 69494  | 58579  | 33124  | 23195  | 25099  | 25522  |
| pmepa1            | 106844 | 144676 | 166406 | 188396 | 95758  | 68204  | 47235  | 44769  |
| zgc-174006        | 121    | 184    | 183    | 229    | 112    | 74     | 500    | 237    |
| opn1sw1           | 244564 | 350986 | 314777 | 261697 | 116582 | 86563  | 127661 | 134584 |
| dio1              | 3504   | 4582   | 4154   | 2979   | 1189   | 861    | 1594   | 1559   |
| slc34a2a          | 6288   | 8829   | 7181   | 7101   | 3268   | 1262   | 2807   | 3127   |
| lepa              | 29     | 74     | 71     | 20     | 19     | 35     | 451    | 268    |
| LOC564844         | 1348   | 1550   | 1527   | 1365   | 636    | 319    | 465    | 491    |
| zgc-92406         | 1562   | 2377   | 1596   | 1477   | 554    | 411    | 702    | 597    |
| akr1a1a           | 311    | 481    | 511    | 507    | 315    | 47     | 154    | 108    |
| angptl3           | 3098   | 4591   | 3246   | 3060   | 1144   | 842    | 1528   | 1396   |
| vgll4             | 145152 | 195713 | 217307 | 245305 | 120335 | 88650  | 69036  | 62315  |
| rnasel3           | 739    | 1639   | 1829   | 1359   | 613    | 228    | 644    | 541    |
| mep1b             | 5232   | 4852   | 4290   | 3599   | 985    | 849    | 2008   | 1604   |
| zgc-77778         | 1789   | 2262   | 2414   | 2130   | 591    | 1777   | 4968   | 4938   |
| ugt5b3            | 1543   | 2152   | 1854   | 1585   | 875    | 440    | 676    | 820    |
| cyp2aa8           | 436    | 1632   | 1246   | 911    | 529    | 485    | 165    | 542    |
| abcg2b            | 1369   | 2033   | 1830   | 1502   | 987    | 493    | 588    | 493    |
| cyp2k6            | 447    | 738    | 453    | 375    | 240    | 260    | 1588   | 1170   |
| abp1              | 14571  | 19840  | 17246  | 13769  | 6059   | 3783   | 7916   | 7116   |
| zgc-112210        | 623    | 909    | 829    | 669    | 448    | 226    | 196    | 262    |
| slc16a12b         | 6852   | 9689   | 8262   | 8460   | 2424   | 4936   | 19215  | 18156  |
| LOC568900         | 17552  | 21469  | 22390  | 18016  | 6393   | 2799   | 9415   | 7440   |
| ugt5b4            | 1591   | 2414   | 2038   | 1754   | 632    | 409    | 810    | 789    |
| zgc-136909        | 1167   | 1867   | 1703   | 1841   | 562    | 217    | 594    | 635    |
| zgc-154020        | 964    | 7101   | 2551   | 1568   | 881    | 1592   | 5989   | 3842   |
| stc2              | 2584   | 3144   | 2575   | 2281   | 986    | 405    | 1010   | 963    |
| hmga1b            | 5850   | 7317   | 6433   | 5524   | 2075   | 5646   | 15839  | 13825  |



|                   |        |        |        |        |       |       |        |       |
|-------------------|--------|--------|--------|--------|-------|-------|--------|-------|
| rbp2a             | 13421  | 19478  | 14173  | 14329  | 7213  | 5569  | 6815   | 6763  |
| zgc-100868        | 7082   | 13684  | 6744   | 6002   | 6453  | 7816  | 18302  | 14803 |
| LOC100005630      | 1970   | 2865   | 2489   | 2133   | 1004  | 603   | 837    | 975   |
| cx32.3            | 3516   | 5175   | 4414   | 4066   | 1713  | 1043  | 1939   | 1746  |
| rbp2b             | 1935   | 2754   | 2220   | 2195   | 817   | 980   | 841    | 1063  |
| sult1st2          | 1517   | 2257   | 1620   | 1365   | 550   | 329   | 773    | 641   |
| zgc-63614         | 1598   | 1959   | 1353   | 1174   | 426   | 333   | 636    | 586   |
| igfbp2a           | 6382   | 9648   | 8826   | 8547   | 3946  | 2647  | 3406   | 3714  |
| hsp70             | 148    | 321    | 360    | 285    | 261   | 240   | 717    | 361   |
| pm20d1.1          | 7003   | 8342   | 7562   | 6033   | 2428  | 1739  | 3611   | 3060  |
| zgc-174688        | 260    | 317    | 171    | 151    | 63    | 45    | 39     | 36    |
| faah2b            | 2067   | 3092   | 2361   | 2387   | 1052  | 767   | 1095   | 1069  |
| zgc-153913        | 1691   | 3114   | 2617   | 2397   | 938   | 719   | 1119   | 1186  |
| pfkfb3            | 12935  | 19186  | 14796  | 11083  | 2709  | 6942  | 40415  | 35753 |
| aqp8a.2           | 4157   | 5492   | 5048   | 4514   | 2344  | 1391  | 2306   | 2111  |
| zgc-153846        | 2160   | 2070   | 1663   | 1471   | 533   | 1098  | 4154   | 3770  |
| si-dkey-14d8.6    | 9184   | 11799  | 9550   | 7546   | 1714  | 1299  | 5367   | 3516  |
| ndrg1l            | 8290   | 11672  | 10352  | 8171   | 2059  | 4690  | 21794  | 18536 |
| ctsb              | 6367   | 8007   | 8620   | 6946   | 2813  | 1726  | 3667   | 3018  |
| pygl              | 7289   | 7326   | 7057   | 6830   | 2729  | 2553  | 3111   | 2749  |
| crygmx1           | 234    | 231    | 237    | 144    | 148   | 396   | 795    | 741   |
| upb1              | 3048   | 4041   | 3715   | 3626   | 1530  | 999   | 1775   | 1551  |
| cpa5              | 231875 | 279079 | 281534 | 175704 | 52348 | 29304 | 117532 | 95869 |
| zgc-198195        | 1880   | 2502   | 2079   | 1642   | 597   | 327   | 921    | 886   |
| igf2b             | 5345   | 7332   | 5396   | 4639   | 1455  | 2220  | 13832  | 11667 |
| cat               | 19252  | 27859  | 25541  | 22075  | 5912  | 4836  | 12538  | 11564 |
| cish              | 5285   | 8562   | 7475   | 6295   | 1710  | 672   | 3743   | 3397  |
| cfhl2             | 442    | 994    | 806    | 469    | 419   | 175   | 240    | 273   |
| zgc-77938         | 3904   | 5210   | 4882   | 4485   | 2618  | 1695  | 2198   | 2095  |
| ela2l             | 305859 | 340358 | 346961 | 261409 | 73515 | 24720 | 140493 | 99508 |
| dpyd              | 19392  | 26263  | 22211  | 21138  | 8635  | 5219  | 11622  | 9751  |
| cyp3c4            | 1542   | 1715   | 1276   | 942    | 440   | 328   | 611    | 602   |
| gc                | 19308  | 23437  | 20640  | 17028  | 5547  | 6527  | 10264  | 10279 |
| zgc-162356        | 15702  | 20142  | 15912  | 13683  | 5834  | 3726  | 8589   | 7984  |
| abcg8             | 1808   | 1997   | 1738   | 1532   | 933   | 473   | 886    | 625   |
| ezh2              | 1168   | 2402   | 2162   | 1837   | 1051  | 1894  | 4629   | 4027  |
| LOC100007703      | 39     | 171    | 80     | 118    | 13    | 2     | 4      | 8     |
| rdh1              | 9914   | 12157  | 11599  | 9430   | 3735  | 3006  | 5695   | 4895  |
| si-dkey-45m5.4    | 894    | 1249   | 1345   | 1085   | 419   | 684   | 2663   | 2403  |
| crygm1            | 251    | 244    | 173    | 90     | 64    | 142   | 644    | 604   |
| LOC564868         | 2915   | 2438   | 1989   | 1977   | 1385  | 1876  | 5416   | 3844  |
| agmat             | 2929   | 4079   | 4139   | 3238   | 1056  | 669   | 1743   | 1806  |
| cd36              | 27156  | 32871  | 27301  | 21687  | 7548  | 5590  | 13867  | 12464 |
| slc2a2            | 7754   | 10696  | 8463   | 8133   | 2820  | 1740  | 4283   | 3871  |
| gpx4a             | 35213  | 46415  | 35317  | 30529  | 12429 | 9354  | 20138  | 17872 |
| pdzd3b            | 852    | 1352   | 1153   | 1100   | 773   | 349   | 515    | 352   |
| si-dkey-24l11.1   | 4140   | 5558   | 4706   | 3870   | 1834  | 1021  | 2360   | 2354  |
| cp                | 27645  | 47031  | 44899  | 30190  | 14595 | 11222 | 20909  | 18095 |
| ctsl.1            | 32891  | 44974  | 51199  | 40852  | 18128 | 10512 | 20524  | 16798 |
| zgc-110409        | 6024   | 8268   | 7763   | 6400   | 4265  | 2192  | 3837   | 3420  |
| si-ch211-284e20.8 | 2168   | 3440   | 3460   | 3118   | 1506  | 786   | 1558   | 1450  |

|                   |         |         |         |         |         |        |         |         |
|-------------------|---------|---------|---------|---------|---------|--------|---------|---------|
| zgc-112282        | 5435    | 8414    | 5321    | 4514    | 1766    | 992    | 3682    | 2932    |
| si-ch211-12e13.7  | 730     | 371     | 359     | 361     | 52      | 36     | 176     | 139     |
| grk7a             | 40669   | 54478   | 44316   | 39400   | 13520   | 12930  | 24118   | 25669   |
| acox1             | 9461    | 14601   | 12342   | 9969    | 4702    | 3109   | 5859    | 6046    |
| zgc-110200        | 6539    | 9197    | 7629    | 7476    | 3337    | 1731   | 4967    | 4095    |
| pck2              | 27078   | 38553   | 31363   | 27470   | 13200   | 8356   | 16259   | 16484   |
| grk1b             | 5059    | 6316    | 5309    | 4365    | 2376    | 2104   | 3134    | 2632    |
| cldn5b            | 1416    | 2557    | 2185    | 1808    | 684     | 1236   | 4282    | 4659    |
| zgc-153102        | 1097    | 910     | 781     | 732     | 527     | 695    | 2135    | 1526    |
| zgc-153920        | 44      | 44      | 37      | 60      | 58      | 123    | 295     | 209     |
| ulk1a             | 4324    | 5385    | 4497    | 3698    | 1096    | 2412   | 9854    | 8173    |
| zgc-103559        | 1226    | 1701    | 1527    | 1202    | 659     | 365    | 632     | 624     |
| pparaa            | 7543    | 10073   | 9319    | 9002    | 2932    | 1292   | 4472    | 4180    |
| LOC563738         | 2160    | 3301    | 3136    | 2720    | 1391    | 716    | 1477    | 1322    |
| zgc-171226        | 282     | 246     | 159     | 87      | 178     | 149    | 637     | 613     |
| cyt1              | 420217  | 554820  | 462018  | 477169  | 152597  | 88961  | 208879  | 240815  |
| acad11            | 2217    | 3604    | 3426    | 3039    | 1604    | 967    | 1630    | 1550    |
| c9                | 11341   | 16001   | 16559   | 12906   | 4548    | 5080   | 8072    | 6708    |
| si-dkeyp-1h4.3    | 120     | 137     | 155     | 90      | 116     | 142    | 418     | 425     |
| LOC796447         | 9980    | 14002   | 13233   | 13153   | 4390    | 10567  | 25431   | 23920   |
| xpnpep2           | 3971    | 5247    | 5039    | 3814    | 1470    | 1259   | 2505    | 1943    |
| zgc-153896        | 1261    | 1946    | 1547    | 1415    | 779     | 418    | 749     | 748     |
| si-ch211-133l5.7  | 4298    | 5629    | 4078    | 3154    | 1180    | 1026   | 2296    | 2310    |
| LOC100002960      | 2464    | 3659    | 3163    | 3587    | 1825    | 1431   | 1541    | 1533    |
| tdo2a             | 10451   | 14623   | 12191   | 10925   | 3851    | 3402   | 6389    | 5256    |
| zgc-172079        | 4122    | 6382    | 6429    | 4818    | 2200    | 1432   | 3016    | 2622    |
| si-ch211-244a23.1 | 1280    | 1859    | 1379    | 1815    | 748     | 1242   | 3545    | 3371    |
| ugt5d1            | 573     | 810     | 582     | 637     | 432     | 151    | 270     | 279     |
| aqp10a            | 1090    | 1564    | 1342    | 1163    | 386     | 235    | 522     | 593     |
| zgc-56382         | 15670   | 21056   | 14246   | 15543   | 11150   | 13188  | 36631   | 33650   |
| krt4              | 2277570 | 3172660 | 2725380 | 2644105 | 1040929 | 626653 | 1408020 | 1552696 |
| zgc-114170        | 6242    | 7896    | 7208    | 5998    | 2265    | 3145   | 13111   | 11437   |
| mao               | 16333   | 23795   | 20983   | 20093   | 9635    | 6549   | 10653   | 9610    |
| zgc-193613        | 173217  | 278937  | 265754  | 256146  | 109544  | 87162  | 111400  | 134039  |
| zgc-111983        | 18577   | 24715   | 16529   | 18502   | 14008   | 16596  | 43688   | 39311   |
| gcga              | 1089    | 2508    | 1668    | 1296    | 539     | 340    | 768     | 836     |
| cx28.9            | 6056    | 8298    | 6025    | 5132    | 2413    | 1288   | 3779    | 3441    |
| zgc-101540        | 4442    | 6830    | 5315    | 4633    | 1953    | 1225   | 3220    | 2896    |
| apoa1             | 167473  | 305469  | 296771  | 316494  | 165452  | 130220 | 114731  | 164989  |
| ctsh              | 3684    | 5485    | 5016    | 3851    | 2596    | 1506   | 2384    | 2129    |
| zgc-175280        | 9425    | 12691   | 10812   | 10062   | 4095    | 2786   | 5897    | 5184    |
| hsd11b3a          | 3017    | 3955    | 3146    | 2771    | 1269    | 748    | 1559    | 1705    |
| zgc-103681        | 768     | 1125    | 924     | 817     | 381     | 212    | 409     | 444     |
| si-dkey-31f5.1    | 5066    | 7195    | 6266    | 5532    | 3244    | 1650   | 3530    | 2902    |
| mep1a.1           | 7567    | 8124    | 8670    | 6560    | 3056    | 2434   | 3922    | 3887    |
| si-ch73-252g14.4  | 4801    | 6539    | 6080    | 5086    | 1145    | 1045   | 2850    | 2353    |
| dhrs1             | 7702    | 10402   | 8778    | 8569    | 3586    | 2629   | 4740    | 4536    |
| zgc-112160        | 145092  | 189645  | 177034  | 135568  | 40288   | 17895  | 83776   | 65624   |
| fep15             | 5631    | 7805    | 7796    | 6411    | 3305    | 2173   | 3650    | 2818    |
| zgc-194626        | 80      | 154     | 168     | 145     | 52      | 32     | 36      | 19      |
| cyp2n13           | 10566   | 16246   | 12282   | 10199   | 3732    | 3109   | 7053    | 7281    |

|                  |        |        |        |        |       |       |        |       |
|------------------|--------|--------|--------|--------|-------|-------|--------|-------|
| zgc-153036       | 1760   | 2440   | 2032   | 2097   | 790   | 448   | 1001   | 1050  |
| scp2             | 24472  | 33517  | 29912  | 27776  | 11055 | 8286  | 14812  | 13750 |
| zgc-66484        | 3278   | 4764   | 3832   | 3051   | 1602  | 1272  | 2334   | 1897  |
| LOC100006793     | 2472   | 3190   | 2525   | 2228   | 1006  | 584   | 1247   | 1388  |
| si-ch211-117n7.7 | 979    | 1124   | 1180   | 970    | 619   | 492   | 475    | 439   |
| LOC100005645     | 1101   | 1428   | 1208   | 910    | 425   | 272   | 543    | 463   |
| cyp2p8           | 2520   | 3372   | 2747   | 2335   | 1145  | 817   | 1498   | 1531  |
| cyp7a1a          | 9226   | 10583  | 7455   | 5677   | 2402  | 1259  | 4572   | 4027  |
| f7               | 3986   | 6429   | 6036   | 5976   | 1897  | 1578  | 3354   | 2527  |
| ethe1            | 5089   | 7066   | 6880   | 6967   | 2692  | 1838  | 3603   | 3176  |
| kera             | 2302   | 3661   | 2804   | 2247   | 1491  | 1084  | 1564   | 1420  |
| lta4h            | 9244   | 13896  | 10946  | 8766   | 4542  | 3160  | 7033   | 6382  |
| zgc-162331       | 2910   | 3877   | 4004   | 3859   | 1094  | 755   | 1901   | 1865  |
| zgc-92763        | 2675   | 3826   | 3306   | 2600   | 1026  | 987   | 1908   | 1859  |
| zgc-92739        | 7807   | 10748  | 11217  | 9951   | 3142  | 2524  | 5788   | 5062  |
| mgp              | 155    | 226    | 229    | 208    | 61    | 124   | 586    | 578   |
| a2ml             | 24649  | 40098  | 35656  | 29002  | 12152 | 8870  | 22952  | 19406 |
| comta            | 1790   | 2518   | 2167   | 1856   | 872   | 576   | 1050   | 849   |
| proc             | 1935   | 2846   | 2601   | 2022   | 916   | 535   | 1255   | 1136  |
| zgc-91963        | 58     | 316    | 112    | 133    | 33    | 59    | 539    | 352   |
| pnp4b            | 17968  | 24620  | 20341  | 19484  | 7402  | 4362  | 12447  | 9773  |
| gnat2            | 72846  | 96614  | 78728  | 63534  | 29245 | 27140 | 46847  | 44460 |
| klf11b           | 2079   | 4450   | 4981   | 4280   | 1718  | 2851  | 7639   | 6895  |
| zgc-86757        | 27594  | 35437  | 28915  | 24439  | 8723  | 11988 | 59955  | 55443 |
| sesn2            | 758    | 1240   | 818    | 986    | 372   | 468   | 1921   | 1407  |
| mtp              | 7548   | 10650  | 9078   | 8209   | 3952  | 2624  | 5416   | 4983  |
| bbc3             | 3838   | 4518   | 3897   | 3240   | 1203  | 2136  | 7604   | 6206  |
| uox              | 8533   | 9719   | 7337   | 6007   | 1779  | 2232  | 4226   | 4004  |
| zgc-114142       | 12322  | 17226  | 15508  | 13660  | 4983  | 4442  | 8213   | 8208  |
| LOC100006238     | 4694   | 6202   | 5523   | 4954   | 1750  | 1429  | 3073   | 2551  |
| neu3.3           | 1204   | 1541   | 1354   | 814    | 438   | 214   | 673    | 557   |
| fads2            | 5580   | 7142   | 5558   | 6394   | 1753  | 1128  | 2935   | 2352  |
| cyp2aa9          | 118    | 388    | 273    | 319    | 121   | 69    | 40     | 204   |
| phyh             | 5289   | 7405   | 6166   | 5285   | 1440  | 1254  | 3589   | 3488  |
| tmem195          | 6977   | 8323   | 6600   | 5240   | 2892  | 1878  | 3151   | 4185  |
| rdh5             | 6807   | 8887   | 7570   | 6200   | 3046  | 2718  | 4256   | 3539  |
| gabra6a          | 2181   | 2916   | 2783   | 2569   | 1110  | 835   | 1578   | 1340  |
| acsf2            | 5294   | 8332   | 8281   | 7179   | 3657  | 2705  | 4129   | 4484  |
| guca1d           | 903    | 535    | 426    | 477    | 67    | 57    | 294    | 280   |
| rlbp1b           | 18076  | 23169  | 19459  | 16202  | 7548  | 7204  | 11187  | 11711 |
| cyp3a65          | 184822 | 233584 | 183047 | 154225 | 48770 | 41307 | 107855 | 98082 |
| mep1a.2          | 4884   | 6057   | 5753   | 4442   | 2583  | 2105  | 3044   | 2736  |
| zgc-111821       | 1868   | 2101   | 2034   | 1395   | 715   | 908   | 3030   | 3389  |
| slc43a1b         | 5426   | 6819   | 5999   | 5143   | 2536  | 1831  | 3380   | 3462  |
| foxo3a           | 38388  | 51189  | 44838  | 39079  | 14376 | 9303  | 24943  | 24408 |
| stk24a           | 1413   | 1965   | 1570   | 1280   | 803   | 502   | 809    | 675   |
| zgc-110354       | 1228   | 3034   | 1535   | 1491   | 1522  | 2070  | 3645   | 2911  |
| zgc-153394       | 595    | 904    | 842    | 908    | 225   | 151   | 411    | 422   |
| tm4sf5           | 2235   | 3388   | 2736   | 2289   | 1094  | 614   | 1647   | 1408  |
| zgc-77082        | 1776   | 2486   | 2806   | 2436   | 1112  | 590   | 1270   | 1290  |
| zgc-110266       | 805    | 994    | 992    | 717    | 238   | 312   | 1715   | 1165  |

|                   |        |        |        |        |        |        |        |        |
|-------------------|--------|--------|--------|--------|--------|--------|--------|--------|
| acaa1             | 3137   | 4565   | 4242   | 4057   | 1864   | 1405   | 2415   | 2199   |
| si-dkey-91f15.1   | 456    | 816    | 659    | 380    | 206    | 85     | 308    | 210    |
| gstal             | 14478  | 21060  | 15867  | 14120  | 7785   | 6391   | 10081  | 9700   |
| zgc-114180        | 3604   | 5495   | 4906   | 3696   | 1872   | 1778   | 2745   | 2804   |
| zgc-136410        | 1348   | 1909   | 2052   | 1521   | 609    | 543    | 731    | 1062   |
| zgc-158404        | 722    | 1294   | 618    | 498    | 391    | 994    | 1610   | 1263   |
| ugdh              | 3123   | 4371   | 3494   | 2838   | 2374   | 1353   | 2147   | 1934   |
| zgc-162630        | 7131   | 9106   | 9377   | 9673   | 2247   | 2786   | 14808  | 10114  |
| crygm2c           | 793    | 891    | 785    | 732    | 475    | 454    | 1771   | 1365   |
| gchfr             | 1900   | 2850   | 2637   | 2165   | 824    | 573    | 1043   | 1242   |
| sparcl1           | 4194   | 5491   | 4803   | 4493   | 2157   | 2056   | 2787   | 2879   |
| pltp              | 5047   | 4905   | 3939   | 2621   | 1162   | 2034   | 8762   | 6175   |
| vil1l             | 29544  | 39364  | 34221  | 31163  | 19285  | 13281  | 19444  | 16342  |
| si-dkey-239i20.2  | 1434   | 2010   | 1681   | 1464   | 443    | 246    | 956    | 853    |
| prhoxnb           | 278    | 352    | 377    | 251    | 241    | 120    | 157    | 101    |
| hpx               | 117    | 398    | 322    | 381    | 126    | 54     | 109    | 82     |
| bfb               | 564    | 758    | 563    | 578    | 259    | 120    | 202    | 258    |
| serpina1          | 21250  | 27743  | 22363  | 20549  | 9045   | 6677   | 11713  | 13030  |
| anxa2b            | 2996   | 4217   | 3461   | 3065   | 2180   | 1697   | 1968   | 1528   |
| pglyrp2           | 428    | 539    | 470    | 368    | 210    | 79     | 222    | 174    |
| zgc-173961        | 2930   | 4193   | 2683   | 2498   | 1143   | 1070   | 1934   | 1837   |
| zgc-113028        | 6181   | 8705   | 7647   | 7110   | 3215   | 4848   | 13233  | 11148  |
| igfbp2b           | 1295   | 2146   | 2231   | 2028   | 712    | 521    | 1030   | 933    |
| crygm2b           | 464    | 553    | 419    | 381    | 163    | 330    | 1105   | 729    |
| cyp2x8            | 1743   | 2172   | 1412   | 1271   | 262    | 250    | 866    | 995    |
| adh8b             | 11361  | 15335  | 14397  | 13966  | 6646   | 5300   | 7857   | 7832   |
| abcg5             | 1846   | 2136   | 1714   | 1752   | 954    | 436    | 1093   | 949    |
| zgc-153311        | 236    | 356    | 305    | 293    | 105    | 192    | 706    | 715    |
| si-ch1073-126c3.2 | 536    | 1160   | 769    | 613    | 171    | 72     | 507    | 402    |
| cyb5a             | 4951   | 7301   | 6761   | 5706   | 3689   | 2448   | 3559   | 3459   |
| hkdc1             | 1369   | 2120   | 1723   | 1534   | 1269   | 643    | 983    | 834    |
| cyb5r2            | 1058   | 1543   | 1316   | 1195   | 705    | 424    | 642    | 687    |
| zgc-109930        | 20718  | 28134  | 29222  | 29586  | 7833   | 6123   | 13802  | 12963  |
| cldn15la          | 5839   | 8245   | 7792   | 6490   | 2675   | 2036   | 4616   | 4097   |
| foxo1b            | 796    | 1001   | 846    | 718    | 181    | 304    | 1937   | 1411   |
| zgc-136930        | 249032 | 312253 | 294462 | 256420 | 141633 | 120780 | 130311 | 136946 |
| zgc-194131        | 22442  | 35306  | 32532  | 37076  | 18492  | 12175  | 17090  | 17397  |
| gnb3b             | 51538  | 73434  | 73031  | 65706  | 32506  | 23861  | 37240  | 34971  |
| icn               | 44018  | 64860  | 48924  | 42155  | 11524  | 7295   | 32871  | 31493  |
| rgs2              | 463    | 905    | 812    | 853    | 449    | 378    | 1558   | 1314   |
| gbp               | 9072   | 14073  | 13571  | 12451  | 4804   | 6051   | 23332  | 20388  |
| dnmt6             | 6625   | 9448   | 8576   | 7696   | 2358   | 4296   | 15380  | 12252  |
| pde6c             | 90833  | 116899 | 96714  | 81572  | 26311  | 26612  | 61967  | 63334  |
| zgc-172158        | 999    | 1402   | 1290   | 1042   | 411    | 315    | 707    | 671    |
| si-ch211-214d2.2  | 288    | 567    | 556    | 598    | 280    | 245    | 226    | 244    |
| sult1st6          | 1460   | 1884   | 1795   | 1547   | 827    | 433    | 957    | 959    |
| cyp2aa4           | 357    | 846    | 870    | 406    | 310    | 250    | 239    | 401    |
| aldob             | 525008 | 661130 | 515163 | 434962 | 135190 | 99061  | 327592 | 299001 |
| scd               | 232    | 391    | 265    | 275    | 101    | 78     | 771    | 459    |
| c3c               | 18654  | 25621  | 21721  | 15193  | 5211   | 3693   | 15606  | 11816  |
| mmp9              | 1394   | 17214  | 2642   | 2422   | 635    | 515    | 4741   | 4261   |

|                  |        |        |        |        |        |        |        |        |
|------------------|--------|--------|--------|--------|--------|--------|--------|--------|
| gck              | 70     | 146    | 136    | 68     | 557    | 13     | 90     | 59     |
| zgc-55420        | 63054  | 88437  | 87918  | 80202  | 25283  | 18885  | 43583  | 39368  |
| thbs4b           | 23613  | 30929  | 29483  | 23518  | 11615  | 16490  | 49289  | 40476  |
| slc27a4          | 4697   | 6701   | 6053   | 5087   | 1883   | 1363   | 3332   | 3006   |
| zgc-152945       | 2185   | 8836   | 4433   | 1879   | 558    | 351    | 4399   | 3497   |
| cfhl1            | 181    | 356    | 433    | 298    | 239    | 95     | 175    | 80     |
| zgc-172051       | 7390   | 8032   | 8093   | 6696   | 2236   | 3094   | 4754   | 4800   |
| itgb1b.2         | 3294   | 4449   | 4437   | 3990   | 2375   | 1664   | 2439   | 2051   |
| mogat2           | 4380   | 5653   | 4609   | 3965   | 1696   | 1225   | 2860   | 2656   |
| gh1              | 1793   | 2652   | 2075   | 1122   | 437    | 244    | 1122   | 997    |
| amt              | 3840   | 5677   | 5078   | 4646   | 2027   | 1635   | 2941   | 2666   |
| si-dkey-184p18.2 | 514    | 696    | 547    | 407    | 227    | 248    | 1284   | 1204   |
| sgpl1            | 34459  | 45717  | 36458  | 29463  | 12492  | 8891   | 23363  | 21762  |
| zgc-114041       | 399    | 569    | 489    | 361    | 113    | 159    | 959    | 646    |
| bcl6ab           | 3873   | 4530   | 3973   | 3578   | 1136   | 2134   | 7443   | 6019   |
| dpp4             | 7731   | 9913   | 9218   | 6949   | 3188   | 2305   | 5366   | 4984   |
| ms4a17a.17       | 1276   | 1682   | 1864   | 1398   | 569    | 263    | 922    | 824    |
| decr1            | 2175   | 3320   | 3452   | 3546   | 1580   | 1291   | 1817   | 2074   |
| zgc-114201       | 5774   | 10048  | 7720   | 7901   | 4491   | 2500   | 5441   | 4845   |
| aqp8b            | 26     | 58     | 72     | 42     | 47     | 4      | 11     | 11     |
| ephx1            | 2981   | 3780   | 3211   | 2291   | 829    | 642    | 2082   | 1876   |
| mettl7a          | 1112   | 1481   | 1276   | 1015   | 330    | 332    | 693    | 618    |
| zgc-92474        | 7793   | 9807   | 8934   | 9344   | 2375   | 1664   | 5198   | 4681   |
| apobl            | 553930 | 859088 | 729438 | 563202 | 159176 | 141282 | 440126 | 499132 |
| fhl              | 1268   | 1731   | 1304   | 890    | 412    | 718    | 3031   | 2639   |
| zgc-112368       | 760    | 1319   | 1335   | 634    | 364    | 234    | 2014   | 1609   |
| zgc-172253       | 2819   | 2943   | 3098   | 2453   | 890    | 1086   | 1754   | 1674   |
| prph2b           | 19958  | 25549  | 22562  | 18340  | 6177   | 6081   | 13883  | 14016  |
| zgc-136872       | 1843   | 2290   | 1768   | 1575   | 758    | 451    | 1207   | 1009   |
| zgc-55406        | 101529 | 121997 | 112551 | 100518 | 38954  | 30906  | 64309  | 57847  |
| si-dkey-69o16.5  | 5457   | 7523   | 6577   | 5622   | 1658   | 1560   | 4133   | 3497   |
| zgc-163057       | 85     | 134    | 102    | 118    | 62     | 102    | 257    | 305    |
| cyp51            | 2385   | 3987   | 3406   | 5507   | 1527   | 799    | 2035   | 2068   |
| egr2a            | 278    | 547    | 2551   | 4198   | 208    | 167    | 555    | 809    |
| zgc-136890       | 3065   | 4902   | 3714   | 3177   | 1126   | 741    | 2367   | 2102   |
| ddc              | 3525   | 5077   | 4477   | 3806   | 1697   | 1176   | 2749   | 2425   |
| stra6            | 11259  | 13742  | 12196  | 10415  | 4062   | 3181   | 7344   | 6766   |
| slc5a1           | 24143  | 28633  | 23788  | 22607  | 7632   | 4336   | 16246  | 11942  |
| pla2g12b         | 13239  | 21271  | 19580  | 18470  | 7630   | 6922   | 9826   | 11832  |
| ctdspla          | 9575   | 12317  | 9898   | 8181   | 2643   | 4254   | 18381  | 15617  |
| slc5a5           | 318    | 542    | 491    | 455    | 203    | 78     | 179    | 165    |
| zgc-103580       | 56     | 2839   | 814    | 218    | 109    | 71     | 648    | 996    |
| zgc-56376        | 12108  | 16306  | 14009  | 12424  | 4232   | 7035   | 28320  | 25065  |
| stat3            | 8520   | 13355  | 10833  | 9438   | 2916   | 3473   | 18715  | 13767  |
| zgc-174904       | 3504   | 6186   | 5446   | 4387   | 1600   | 1196   | 2611   | 2464   |
| guca1g           | 1039   | 939    | 642    | 549    | 194    | 151    | 452    | 485    |
| tmem54           | 260    | 342    | 322    | 180    | 52     | 40     | 84     | 80     |
| LOC556575        | 3453   | 4992   | 3555   | 3320   | 1307   | 1232   | 2206   | 2195   |
| aldh9a1a         | 103515 | 131283 | 114351 | 96013  | 37419  | 32035  | 66992  | 63683  |
| zgc-175088       | 4467   | 5917   | 4808   | 3842   | 2438   | 1541   | 2910   | 3022   |
| sult2st1         | 1375   | 1700   | 1256   | 1195   | 484    | 740    | 2900   | 2627   |

|                 |       |        |       |       |       |       |       |       |
|-----------------|-------|--------|-------|-------|-------|-------|-------|-------|
| ezh1            | 5414  | 7132   | 5502  | 4799  | 1758  | 1107  | 3458  | 3103  |
| zgc-154073      | 1299  | 1799   | 1349  | 1190  | 371   | 362   | 2769  | 2590  |
| tmem56b         | 7893  | 11368  | 9707  | 8221  | 2516  | 2084  | 5938  | 5782  |
| slco1d1         | 8892  | 10962  | 9350  | 8012  | 2786  | 2736  | 6104  | 5153  |
| fbp1a           | 11344 | 14297  | 11960 | 9165  | 3052  | 2245  | 7583  | 6940  |
| slc5a9          | 1053  | 1289   | 1242  | 1359  | 529   | 309   | 672   | 628   |
| zgc-103585      | 1412  | 2202   | 2078  | 1690  | 1020  | 773   | 1190  | 1054  |
| dhcr7           | 6425  | 8281   | 9113  | 8754  | 2468  | 1804  | 4912  | 4043  |
| amdhd1          | 1358  | 1807   | 1765  | 1564  | 627   | 496   | 878   | 802   |
| sult1st3        | 1928  | 2552   | 1792  | 1482  | 649   | 422   | 1251  | 1119  |
| gpd1b           | 11330 | 16022  | 15357 | 13648 | 5373  | 5415  | 8577  | 8776  |
| crot            | 4631  | 6731   | 6281  | 5047  | 1718  | 1485  | 3724  | 3944  |
| hao2            | 2456  | 4239   | 4208  | 3947  | 1700  | 1179  | 2178  | 2042  |
| zgc-136353      | 1456  | 2225   | 1854  | 1640  | 910   | 605   | 1006  | 1070  |
| fosl1           | 407   | 1044   | 1826  | 2816  | 382   | 338   | 1644  | 1181  |
| LOC567547       | 2587  | 4037   | 3699  | 3090  | 1241  | 1992  | 6198  | 5144  |
| col10a1         | 12086 | 18118  | 19788 | 14616 | 8210  | 11209 | 25562 | 31313 |
| lgals2b         | 68531 | 102075 | 66696 | 52429 | 22285 | 17175 | 55869 | 47776 |
| si-ch211-81a5.8 | 2358  | 3558   | 3356  | 2823  | 863   | 1058  | 4951  | 3777  |
| zgc-113625      | 26    | 56     | 13    | 3     | 26    | 81    | 123   | 82    |
| tmx3            | 1576  | 1867   | 1721  | 1363  | 457   | 504   | 950   | 951   |
| fbxo32          | 19076 | 20312  | 18034 | 15192 | 2495  | 3657  | 30960 | 29206 |
| icn2            | 18704 | 25512  | 17303 | 12834 | 4831  | 3898  | 13831 | 14047 |
| ugt5a3          | 387   | 490    | 374   | 322   | 114   | 63    | 181   | 201   |
| zgc-153024      | 1856  | 2494   | 2477  | 2177  | 1309  | 829   | 1368  | 1066  |
| zgc-136551      | 3176  | 4673   | 3835  | 3363  | 1155  | 1376  | 6440  | 5037  |
| gpr39           | 15464 | 22349  | 25365 | 25145 | 12112 | 8560  | 13538 | 11345 |
| aacs            | 3037  | 4262   | 3534  | 3067  | 1072  | 952   | 2185  | 2076  |
| gstp2           | 1712  | 2591   | 2120  | 1806  | 876   | 419   | 1567  | 1434  |
| scpp7           | 15    | 5      | 2     | 0     | 0     | 4     | 64    | 63    |
| gtpbp1          | 5736  | 8629   | 6979  | 6172  | 2761  | 3021  | 10859 | 8029  |
| gadd45aa        | 897   | 1650   | 1581  | 1484  | 485   | 825   | 2458  | 2025  |
| LOC567512       | 589   | 656    | 611   | 647   | 169   | 99    | 303   | 329   |
| si-rp71-1g18.10 | 373   | 400    | 488   | 314   | 135   | 122   | 208   | 171   |
| ugt5a2          | 357   | 480    | 408   | 309   | 115   | 55    | 190   | 196   |
| ankrd1b         | 10846 | 14155  | 13234 | 11527 | 6858  | 4915  | 7064  | 7822  |
| dlx4a           | 1453  | 1791   | 1801  | 1769  | 693   | 956   | 2933  | 3098  |
| cpb2            | 825   | 1188   | 952   | 777   | 415   | 363   | 534   | 495   |
| stc1l           | 2194  | 3667   | 2875  | 2332  | 850   | 740   | 1606  | 1648  |
| slc6a11         | 485   | 703    | 515   | 565   | 305   | 168   | 228   | 312   |
| zgc-153443      | 7656  | 9404   | 6986  | 6864  | 1285  | 1142  | 5591  | 4720  |
| slc23a1         | 1571  | 2111   | 1838  | 1665  | 676   | 354   | 1006  | 905   |
| ms4a17a.16      | 443   | 580    | 616   | 496   | 109   | 83    | 247   | 261   |
| ubb             | 12449 | 20240  | 13699 | 12250 | 6690  | 9121  | 27596 | 23553 |
| slco1f4         | 7     | 22     | 15    | 27    | 1     | 22    | 78    | 113   |
| LOC798872       | 10706 | 9465   | 9080  | 10145 | 1339  | 2595  | 15951 | 14384 |
| cyp2p9          | 1220  | 1998   | 1821  | 1293  | 425   | 314   | 886   | 933   |
| sardh           | 5282  | 7121   | 6899  | 6101  | 2424  | 2011  | 3997  | 4089  |
| mybpc2b         | 20103 | 24694  | 20590 | 17912 | 8479  | 12459 | 39953 | 37476 |
| pgm1            | 20453 | 29494  | 25791 | 23691 | 9475  | 7193  | 15877 | 16087 |
| acta2           | 45036 | 62116  | 52104 | 44706 | 17796 | 11450 | 34360 | 30369 |

|                  |         |         |         |         |        |        |        |        |
|------------------|---------|---------|---------|---------|--------|--------|--------|--------|
| mycl1a           | 1564    | 2750    | 2577    | 2205    | 1089   | 1715   | 4132   | 3486   |
| heatr1           | 5886    | 7489    | 6207    | 5167    | 1463   | 1989   | 11208  | 8884   |
| yars             | 3757    | 6022    | 4541    | 3885    | 2407   | 2526   | 8185   | 6277   |
| slc16a9a         | 9804    | 12677   | 10619   | 9006    | 1622   | 3148   | 19437  | 15244  |
| socs3b           | 4243    | 9647    | 7126    | 6518    | 1712   | 1708   | 12666  | 9533   |
| klf13            | 4206    | 5231    | 3394    | 3136    | 656    | 1075   | 8016   | 6167   |
| socs8            | 1038    | 1483    | 1220    | 1034    | 349    | 137    | 658    | 700    |
| slc1a8b          | 2532    | 4361    | 3629    | 3089    | 1050   | 790    | 2402   | 2356   |
| nos2a            | 47      | 74      | 35      | 26      | 9      | 13     | 69     | 31     |
| itpk1            | 7322    | 10253   | 8520    | 6992    | 3144   | 2412   | 5361   | 5028   |
| nipsnap1         | 558     | 761     | 756     | 674     | 209    | 207    | 350    | 361    |
| zgc-123207       | 962     | 1267    | 915     | 855     | 299    | 152    | 605    | 446    |
| gadd45ba         | 14260   | 27404   | 26109   | 34055   | 8568   | 10608  | 40294  | 35136  |
| zgc-123244       | 423     | 597     | 654     | 718     | 299    | 203    | 276    | 242    |
| slc43a2a         | 20315   | 29471   | 19653   | 15351   | 3516   | 6216   | 39887  | 39255  |
| gcshb            | 2114    | 3087    | 2475    | 2164    | 1452   | 1026   | 1754   | 1463   |
| ugt2a3           | 3539    | 4634    | 3828    | 3627    | 1592   | 1244   | 2684   | 2256   |
| lox              | 1126    | 1735    | 1826    | 1760    | 767    | 831    | 2705   | 2624   |
| chpt1            | 17359   | 24709   | 22149   | 19783   | 7247   | 5534   | 13303  | 12722  |
| zgc-92533        | 1058955 | 1364487 | 1190649 | 1181349 | 422551 | 298550 | 719537 | 707175 |
| ppp1r3b          | 197     | 594     | 441     | 373     | 183    | 172    | 207    | 202    |
| brf1a            | 1027    | 1818    | 1324    | 1097    | 369    | 551    | 2244   | 2030   |
| zgc-162969       | 32      | 42      | 34      | 37      | 9      | 2      | 134    | 114    |
| cpa4             | 29244   | 38166   | 35954   | 26678   | 9452   | 3672   | 23120  | 16491  |
| ugt5e1           | 662     | 962     | 913     | 704     | 278    | 222    | 434    | 531    |
| dao.2            | 2621    | 3312    | 3090    | 2557    | 1009   | 800    | 1762   | 1640   |
| desmb            | 5455    | 6157    | 6368    | 5150    | 2685   | 1719   | 3629   | 3415   |
| rx1              | 7181    | 6464    | 5521    | 4951    | 1150   | 1096   | 4142   | 4050   |
| mycn             | 10465   | 14152   | 11605   | 9958    | 4135   | 6864   | 19907  | 16821  |
| hsd17b4          | 23403   | 30696   | 32569   | 30711   | 9723   | 8140   | 17948  | 15878  |
| si-ch211-102c2.6 | 6869    | 9572    | 7819    | 6028    | 2830   | 2031   | 5164   | 5720   |
| zgc-64043        | 6810    | 9543    | 8164    | 7532    | 3095   | 2359   | 5335   | 5445   |
| rybpa            | 4151    | 5558    | 5152    | 4866    | 2046   | 2942   | 8549   | 6915   |
| hbbe3            | 4       | 12      | 12      | 4       | 180    | 28     | 8      | 0      |
| acta1b           | 280034  | 399948  | 356372  | 338998  | 154217 | 113345 | 238484 | 249917 |
| ppp1r3cb         | 7145    | 8963    | 8424    | 7201    | 2425   | 2489   | 5768   | 5143   |
| rgn              | 2931    | 4176    | 3964    | 3465    | 1617   | 1044   | 2329   | 2024   |
| zgc-101129       | 1564    | 1963    | 1708    | 1351    | 504    | 597    | 1127   | 1041   |
| slc34a2aas       | 2688    | 3745    | 3413    | 3840    | 1954   | 1032   | 1834   | 1963   |
| zgc-153038       | 818     | 981     | 1132    | 820     | 298    | 226    | 584    | 420    |
| nbl1             | 4158    | 6037    | 5768    | 6030    | 2081   | 1470   | 3145   | 3143   |
| si-dkey-52k20.7  | 55288   | 62702   | 52586   | 35856   | 11123  | 6456   | 40610  | 25701  |
| acsl5            | 19058   | 25058   | 20196   | 17133   | 6467   | 5983   | 14028  | 13707  |
| slc25a3a         | 7050    | 8848    | 8377    | 6829    | 2556   | 2499   | 5884   | 5437   |
| gdpd1            | 2990    | 4437    | 3530    | 2817    | 1384   | 1022   | 2510   | 2562   |
| zgc-136871       | 2352    | 3530    | 3171    | 2373    | 1239   | 879    | 1924   | 1798   |
| zgc-158281       | 8243    | 10235   | 7606    | 6446    | 2121   | 2758   | 14276  | 11638  |
| sst2             | 396     | 698     | 649     | 451     | 309    | 173    | 304    | 239    |
| crybb2           | 38      | 84      | 56      | 81      | 12     | 34     | 226    | 169    |
| psat1            | 1749    | 3097    | 2647    | 2138    | 1044   | 1609   | 4447   | 3872   |
| snx10a           | 393     | 525     | 545     | 434     | 121    | 258    | 1185   | 876    |

|                  |        |        |        |        |        |       |        |        |
|------------------|--------|--------|--------|--------|--------|-------|--------|--------|
| pm20d1.2         | 3485   | 4347   | 3722   | 2701   | 813    | 647   | 2305   | 2416   |
| fgb              | 13198  | 26201  | 22524  | 21025  | 9077   | 7529  | 17356  | 13513  |
| zgc-162816       | 1102   | 1372   | 1289   | 1299   | 665    | 379   | 793    | 709    |
| zgc-92380        | 10297  | 13783  | 13542  | 12305  | 4263   | 3443  | 7030   | 6974   |
| zgc-153440       | 9695   | 14257  | 11779  | 9460   | 4077   | 3438  | 8343   | 8233   |
| zgc-66382        | 584786 | 741116 | 737079 | 547410 | 162033 | 82639 | 424053 | 345088 |
| pkm2b            | 135863 | 199070 | 207227 | 187301 | 66829  | 51598 | 111716 | 109250 |
| zgc-171534       | 1253   | 1370   | 3124   | 1455   | 9      | 459   | 989    | 848    |
| creb3l3          | 953    | 1224   | 1300   | 1161   | 330    | 218   | 617    | 623    |
| chac1            | 163559 | 197094 | 174775 | 154138 | 46991  | 54229 | 324888 | 246552 |
| crygm6           | 2      | 0      | 3      | 2      | 0      | 4     | 14     | 6      |
| gys2             | 6589   | 8141   | 6959   | 6433   | 1949   | 2110  | 4793   | 4362   |
| zgc-85752        | 1484   | 1876   | 1543   | 1208   | 730    | 766   | 2628   | 1830   |
| mmp14b           | 5740   | 11182  | 7812   | 5918   | 2425   | 3401  | 13345  | 13353  |
| agpat9l          | 2340   | 3225   | 3167   | 2661   | 1211   | 910   | 1980   | 1714   |
| wu-fb12c06       | 7480   | 9719   | 7025   | 6147   | 3775   | 4557  | 11691  | 14778  |
| zgc-136808       | 1134   | 1722   | 1363   | 1161   | 622    | 390   | 770    | 881    |
| atp1a1a.4        | 154315 | 193942 | 146805 | 123494 | 42981  | 36214 | 106633 | 94263  |
| tfr1a            | 2503   | 5683   | 4798   | 3608   | 2066   | 2977  | 8092   | 6641   |
| c8g              | 1071   | 1570   | 1344   | 1046   | 685    | 442   | 998    | 656    |
| zgc-136850       | 1224   | 1446   | 1320   | 989    | 358    | 262   | 783    | 829    |
| cndp2            | 7179   | 10283  | 8563   | 7373   | 4160   | 3195  | 5695   | 5486   |
| gnb5b            | 7926   | 10484  | 9836   | 7704   | 3831   | 3804  | 6577   | 5605   |
| zgc-136820       | 3891   | 6150   | 5133   | 4734   | 2036   | 2781  | 8571   | 7645   |
| zgc-171581       | 733    | 1088   | 952    | 617    | 233    | 163   | 463    | 492    |
| si-ch211-244h7.6 | 902    | 1297   | 958    | 671    | 426    | 229   | 421    | 598    |
| elov1a           | 1058   | 1551   | 1344   | 1274   | 556    | 811   | 2274   | 2164   |
| zgc-92479        | 22426  | 30740  | 29646  | 25155  | 15764  | 10801 | 18020  | 14655  |
| atf3             | 1897   | 4313   | 4105   | 4138   | 1414   | 1174  | 5384   | 4147   |
| zgc-158773       | 172    | 197    | 160    | 216    | 126    | 117   | 325    | 328    |
| slc25a20         | 9727   | 14436  | 14307  | 14719  | 4564   | 4067  | 8908   | 8652   |
| serpinb1l3       | 28174  | 40013  | 34441  | 34556  | 8691   | 7311  | 21469  | 17942  |
| zgc-113291       | 1325   | 1670   | 1397   | 1130   | 317    | 342   | 858    | 894    |
| rgr              | 15603  | 19439  | 16443  | 15007  | 3694   | 3663  | 10841  | 9881   |
| tmprss13a        | 1517   | 2187   | 1559   | 1280   | 616    | 811   | 2921   | 2289   |
| cad              | 23652  | 39227  | 31399  | 28641  | 12183  | 15141 | 56041  | 45325  |
| tectb            | 251    | 376    | 248    | 164    | 99     | 196   | 474    | 655    |
| vsg1             | 4713   | 7361   | 5715   | 4740   | 2138   | 2934  | 9843   | 8801   |
| sult6b1          | 14994  | 22240  | 15209  | 13486  | 6889   | 5616  | 12413  | 10882  |
| frem1a           | 3642   | 6733   | 5587   | 4359   | 1791   | 2244  | 7984   | 8317   |
| dio2             | 264    | 389    | 234    | 286    | 37     | 84    | 647    | 524    |
| sepp1b           | 4994   | 7650   | 7194   | 5972   | 2291   | 4035  | 13669  | 11106  |
| LOC798075        | 955    | 1355   | 1046   | 912    | 499    | 446   | 687    | 673    |
| grwd1            | 3077   | 4301   | 3442   | 3265   | 1632   | 1838  | 6106   | 4596   |
| gstt1b           | 2013   | 2883   | 2344   | 1814   | 1084   | 894   | 1504   | 1468   |
| zgc-101050       | 3950   | 5278   | 4932   | 3733   | 1821   | 1811  | 2842   | 2850   |
| si-ch211-200o3.4 | 5206   | 7130   | 6234   | 4972   | 2466   | 1812  | 4500   | 3883   |
| zgc-77906        | 3614   | 4665   | 4374   | 3609   | 2419   | 1662  | 2382   | 2247   |
| si-ch211-89f7.1  | 2093   | 2611   | 2241   | 2377   | 1075   | 800   | 1536   | 1236   |
| si-dkey-61p9.11  | 139    | 191    | 171    | 54     | 51     | 92    | 481    | 282    |
| mybbp1a          | 9352   | 11512  | 10547  | 9243   | 4367   | 5494  | 17040  | 12232  |



|                   |        |        |        |        |        |        |        |        |
|-------------------|--------|--------|--------|--------|--------|--------|--------|--------|
| fbn2b             | 10338  | 19755  | 18584  | 17279  | 8157   | 10721  | 27622  | 25848  |
| zgc-92040         | 1943   | 2594   | 2622   | 2112   | 779    | 647    | 1497   | 1515   |
| socs1             | 991    | 1817   | 1460   | 1194   | 411    | 202    | 952    | 735    |
| kmo               | 3425   | 4336   | 3582   | 2816   | 1047   | 841    | 2633   | 2362   |
| zgc-56518         | 5137   | 6821   | 5876   | 5232   | 2012   | 1931   | 3881   | 3954   |
| tmem41ab          | 3620   | 4401   | 4470   | 4297   | 1575   | 2081   | 6598   | 5940   |
| atad3b            | 7075   | 9919   | 10449  | 10500  | 4071   | 4696   | 14476  | 10021  |
| crif3             | 5085   | 6973   | 5884   | 4815   | 1991   | 3164   | 9419   | 8002   |
| nle1              | 1883   | 2664   | 2262   | 2002   | 949    | 1068   | 3775   | 2737   |
| zgc-153027        | 378    | 806    | 694    | 711    | 259    | 342    | 1087   | 731    |
| lpl               | 35548  | 40881  | 29895  | 24854  | 9102   | 5128   | 21748  | 19083  |
| zgc-56085         | 19367  | 25408  | 25646  | 24088  | 9707   | 8621   | 17102  | 16644  |
| ace2              | 49146  | 61511  | 53233  | 45009  | 20070  | 15184  | 34431  | 31797  |
| try               | 638811 | 766345 | 745715 | 590273 | 179549 | 109152 | 443576 | 339723 |
| cpb1              | 101631 | 125944 | 126413 | 81026  | 26309  | 14150  | 74490  | 57122  |
| LOC567396         | 373    | 626    | 591    | 520    | 174    | 142    | 262    | 248    |
| crabp2b           | 1664   | 2853   | 2309   | 2312   | 942    | 1217   | 3532   | 3637   |
| zgc-63663         | 88435  | 114712 | 91260  | 77581  | 33684  | 25866  | 67399  | 55328  |
| epyc              | 8584   | 12214  | 10690  | 8718   | 5146   | 4814   | 6042   | 7154   |
| lect2l            | 2008   | 7551   | 4655   | 2445   | 1175   | 1037   | 4831   | 3141   |
| zgc-73056         | 7924   | 11037  | 10218  | 9304   | 5068   | 4709   | 6445   | 6040   |
| zgc-175221        | 5771   | 8881   | 5535   | 4230   | 1867   | 2785   | 10851  | 9919   |
| zgc-86896         | 23797  | 33054  | 31834  | 27611  | 13133  | 10104  | 17987  | 19449  |
| zgc-56429         | 3978   | 5514   | 4993   | 4414   | 2081   | 1554   | 3202   | 2911   |
| tfcp2l1           | 264    | 566    | 358    | 382    | 78     | 50     | 186    | 198    |
| si-ch211-284o19.6 | 111    | 153    | 158    | 154    | 28     | 44     | 44     | 45     |
| zgc-136545        | 3324   | 5257   | 4273   | 3951   | 1786   | 2554   | 6905   | 6479   |
| arg2              | 52858  | 58243  | 48237  | 38070  | 10767  | 7098   | 36705  | 30683  |
| cpa2              | 149    | 152    | 233    | 122    | 33     | 86     | 331    | 206    |
| ilvbl             | 4749   | 6516   | 5677   | 4875   | 2437   | 1938   | 4113   | 3527   |
| slc15a2           | 4831   | 5667   | 5943   | 4065   | 2040   | 1545   | 3736   | 3320   |
| tars              | 4366   | 7372   | 5790   | 5252   | 3012   | 3749   | 9548   | 7792   |
| scinla            | 21965  | 31404  | 25406  | 20704  | 9723   | 13094  | 44058  | 41143  |
| sod1              | 12403  | 16755  | 15195  | 13152  | 5964   | 4715   | 10826  | 9204   |
| zgc-154001        | 7561   | 9742   | 9044   | 7521   | 2947   | 3642   | 14442  | 10501  |
| baxa              | 2545   | 3858   | 3340   | 2790   | 1216   | 1702   | 5177   | 4587   |
| defbl1            | 2056   | 2774   | 2045   | 1243   | 644    | 560    | 1609   | 1484   |
| gcat              | 7046   | 10429  | 8655   | 7797   | 2693   | 1955   | 6149   | 5439   |
| fabp6             | 16738  | 23038  | 18312  | 16205  | 8390   | 7596   | 12567  | 11370  |
| gyg2              | 82     | 97     | 84     | 68     | 25     | 60     | 256    | 216    |
| slc1a2a           | 6660   | 9315   | 7673   | 6622   | 2076   | 2367   | 5657   | 5167   |
| wu-fd55e03        | 5093   | 6580   | 5916   | 4840   | 3168   | 2085   | 3879   | 3171   |
| si-ch211-153j24.4 | 18     | 26     | 26     | 56     | 8      | 30     | 89     | 71     |
| serpind1          | 3437   | 4682   | 3657   | 3216   | 1094   | 899    | 2817   | 2216   |
| alas2             | 2189   | 5681   | 4575   | 3498   | 2522   | 2544   | 7129   | 7503   |
| klf2b             | 5245   | 8782   | 13545  | 13699  | 2007   | 1361   | 5754   | 7973   |
| ch25hl1.1         | 1444   | 2145   | 1784   | 1589   | 784    | 533    | 1049   | 1009   |
| zgc-162184        | 2013   | 2753   | 1828   | 1313   | 470    | 726    | 3210   | 3517   |
| c11orf67          | 1638   | 1987   | 1514   | 1270   | 395    | 305    | 995    | 982    |
| cpeb4             | 5520   | 6764   | 5599   | 5171   | 1751   | 1362   | 4146   | 3870   |
| LOC555692         | 1451   | 2488   | 1997   | 1867   | 1011   | 1180   | 3174   | 2310   |

|                   |        |        |        |        |       |       |        |        |
|-------------------|--------|--------|--------|--------|-------|-------|--------|--------|
| fgf19             | 127    | 213    | 384    | 358    | 119   | 60    | 154    | 119    |
| cpa1              | 20530  | 24128  | 19670  | 13154  | 3158  | 2093  | 14448  | 10689  |
| aadacl4           | 134    | 180    | 177    | 203    | 32    | 31    | 92     | 52     |
| crtac1            | 5123   | 5529   | 5001   | 4374   | 979   | 984   | 3607   | 2617   |
| slc7a3            | 24541  | 34806  | 26032  | 22682  | 6978  | 10629 | 45815  | 39423  |
| si-dkey-266f7.9   | 2426   | 3184   | 3339   | 2511   | 736   | 698   | 4814   | 3679   |
| pcyt1bb           | 1068   | 1505   | 1233   | 1315   | 588   | 390   | 848    | 697    |
| f9                | 106    | 172    | 225    | 152    | 60    | 28    | 38     | 52     |
| msrb2             | 1198   | 1913   | 1671   | 1488   | 711   | 600   | 1030   | 961    |
| nop58             | 7912   | 12465  | 10362  | 10646  | 6264  | 7621  | 16353  | 12919  |
| gpcpd1            | 11163  | 14748  | 9974   | 8130   | 2452  | 3816  | 19860  | 15749  |
| cell              | 32155  | 43813  | 34071  | 22524  | 6813  | 4342  | 23023  | 22207  |
| ugt5a4            | 111    | 235    | 124    | 92     | 29    | 22    | 56     | 54     |
| zgc-77739         | 2674   | 3413   | 2894   | 2560   | 1214  | 846   | 2208   | 1981   |
| zgc-64031         | 2197   | 3413   | 3238   | 2986   | 1084  | 737   | 1848   | 1932   |
| abcd3a            | 11644  | 15894  | 13179  | 11600  | 5646  | 4333  | 9563   | 8190   |
| rpe65a            | 40187  | 46946  | 41972  | 38997  | 18397 | 15737 | 26970  | 24370  |
| si-ch211-244h7.5  | 504    | 623    | 504    | 303    | 182   | 158   | 248    | 229    |
| aldoab            | 191806 | 278176 | 240248 | 214387 | 71315 | 62103 | 155589 | 145221 |
| si-dkey-10o6.2    | 567    | 950    | 835    | 502    | 276   | 218   | 470    | 449    |
| zgc-153704        | 10056  | 13717  | 11579  | 8832   | 3087  | 4371  | 18579  | 17864  |
| spam1             | 137    | 282    | 268    | 253    | 127   | 79    | 137    | 81     |
| dao.3             | 117    | 166    | 146    | 159    | 103   | 38    | 60     | 64     |
| si-ch73-6k14.1    | 93     | 536    | 358    | 222    | 58    | 84    | 658    | 326    |
| pgrmc1            | 4919   | 6680   | 5885   | 5093   | 2702  | 2419  | 4103   | 4059   |
| cpt2              | 2032   | 3621   | 3244   | 3039   | 1519  | 1191  | 2350   | 2179   |
| zgc-112199        | 32     | 67     | 49     | 60     | 18    | 10    | 125    | 64     |
| apoa4             | 42633  | 66346  | 63161  | 59803  | 31882 | 21233 | 37357  | 36747  |
| ctrl              | 247555 | 308227 | 298649 | 251185 | 83116 | 46711 | 167610 | 139140 |
| sid4              | 12020  | 17161  | 15371  | 15878  | 5388  | 5269  | 10811  | 8098   |
| zgc-171704        | 37     | 54     | 51     | 22     | 5     | 22    | 166    | 133    |
| vdrb              | 8565   | 10497  | 8523   | 7065   | 1303  | 1233  | 6485   | 5560   |
| ckmt1             | 21636  | 31360  | 28716  | 26802  | 14215 | 11441 | 19165  | 17679  |
| LOC100005578      | 2      | 0      | 0      | 0      | 0     | 3     | 12     | 2      |
| zgc-56292         | 610    | 992    | 713    | 757    | 559   | 643   | 1318   | 1181   |
| zgc-73230         | 6090   | 8174   | 6917   | 6293   | 3111  | 3555  | 11463  | 9550   |
| fgg               | 16247  | 28064  | 24012  | 22205  | 9231  | 7027  | 19387  | 15556  |
| c6                | 1950   | 4099   | 2974   | 1906   | 862   | 828   | 5324   | 4218   |
| fkbp11            | 3872   | 5352   | 5685   | 4556   | 1794  | 1607  | 3517   | 2611   |
| dhrs11b           | 1814   | 2399   | 2271   | 1862   | 880   | 626   | 1403   | 1295   |
| zgc-174908        | 2915   | 3887   | 3464   | 3009   | 1023  | 784   | 2391   | 2208   |
| pus7              | 7674   | 9102   | 8652   | 8137   | 3191  | 3607  | 13728  | 9333   |
| zgc-101897        | 4685   | 7124   | 5804   | 4514   | 2209  | 2005  | 4093   | 3995   |
| hells             | 1228   | 2101   | 1830   | 1585   | 996   | 1594  | 3156   | 2579   |
| wdr75             | 5024   | 7270   | 5770   | 4995   | 2356  | 2833  | 9939   | 8018   |
| elovl4b           | 4677   | 5935   | 5873   | 4640   | 2015  | 1889  | 4003   | 3850   |
| zgc-112407        | 1889   | 2362   | 2404   | 2276   | 566   | 534   | 1444   | 1432   |
| si-ch211-140f21.1 | 10089  | 13974  | 11557  | 8859   | 3419  | 3524  | 8497   | 7379   |
| abcg2a            | 37332  | 40676  | 31849  | 29389  | 8436  | 7492  | 25556  | 19324  |
| zgc-154006        | 683    | 818    | 903    | 713    | 320   | 283   | 424    | 365    |
| gamt              | 100747 | 146489 | 120461 | 111237 | 49964 | 38727 | 80187  | 70428  |

|                   |        |        |        |        |        |        |        |        |
|-------------------|--------|--------|--------|--------|--------|--------|--------|--------|
| ckba              | 16051  | 20203  | 16876  | 14878  | 6646   | 5959   | 12901  | 11330  |
| zgc-162925        | 1452   | 2332   | 2049   | 1829   | 612    | 940    | 3214   | 2192   |
| rrm2              | 1477   | 2536   | 2271   | 1808   | 950    | 1779   | 4146   | 3984   |
| ctps              | 3171   | 5090   | 3818   | 3387   | 1990   | 2339   | 6663   | 5353   |
| zgc-194392        | 300    | 447    | 385    | 378    | 302    | 213    | 142    | 152    |
| zgc-63647         | 6181   | 8328   | 7462   | 7352   | 2313   | 2637   | 5751   | 5016   |
| rx2               | 793    | 1321   | 1598   | 1361   | 488    | 403    | 879    | 738    |
| zgc-171281        | 2728   | 3461   | 2596   | 2444   | 686    | 1258   | 4800   | 3958   |
| faah2a            | 2179   | 3242   | 3123   | 2280   | 969    | 801    | 1945   | 1845   |
| opn1mw2           | 1744   | 1249   | 1765   | 1065   | 341    | 482    | 1090   | 736    |
| zgc-92041         | 731987 | 925198 | 898109 | 647791 | 170179 | 106029 | 528130 | 412649 |
| acads             | 3582   | 5417   | 5484   | 4437   | 2224   | 2153   | 3728   | 3114   |
| ldlr              | 11375  | 16491  | 13350  | 12229  | 3465   | 1670   | 9151   | 7958   |
| hadh              | 6509   | 9293   | 8651   | 7183   | 3703   | 3271   | 5972   | 5877   |
| si-dkey-21e7.2    | 6978   | 8560   | 7939   | 6757   | 2495   | 2487   | 5842   | 4643   |
| bcat2             | 14320  | 16376  | 14639  | 12445  | 4897   | 3552   | 10392  | 9768   |
| zgc-161973        | 1413   | 1677   | 1306   | 1044   | 349    | 418    | 1007   | 972    |
| rltgr             | 2085   | 2942   | 2201   | 1971   | 1017   | 712    | 1651   | 1693   |
| si-ch211-235o23.1 | 1966   | 2482   | 2223   | 1706   | 544    | 808    | 3519   | 2808   |
| aspn              | 1403   | 2407   | 1893   | 1371   | 674    | 1036   | 3166   | 3533   |
| glc               | 26652  | 35276  | 29722  | 25343  | 7744   | 6397   | 20624  | 18391  |
| ggct              | 7518   | 9447   | 9038   | 8936   | 3951   | 6608   | 13030  | 12185  |
| aqp10b            | 450    | 552    | 577    | 681    | 126    | 97     | 336    | 243    |
| zgc-163025        | 2024   | 3269   | 2841   | 2740   | 742    | 453    | 1822   | 1643   |
| cyp19a1b          | 374    | 428    | 335    | 240    | 85     | 174    | 665    | 670    |
| fmo5              | 3565   | 4594   | 3806   | 2788   | 1448   | 1011   | 2378   | 2393   |
| gadd45ab          | 2685   | 4335   | 5280   | 4872   | 2665   | 1359   | 2732   | 2523   |
| ca4b              | 628    | 745    | 619    | 810    | 208    | 181    | 356    | 449    |
| zgc-158823        | 1277   | 1528   | 1248   | 1174   | 303    | 187    | 752    | 740    |
| fbxl8             | 924    | 1273   | 1241   | 926    | 330    | 207    | 726    | 537    |
| ada               | 39783  | 54646  | 41423  | 34238  | 14511  | 12733  | 31277  | 29789  |
| prg4              | 2211   | 2834   | 2128   | 1802   | 646    | 866    | 3804   | 3106   |
| cant1b            | 2481   | 3162   | 3013   | 3124   | 1128   | 1034   | 1746   | 1698   |
| ptp4a3            | 11619  | 14106  | 10618  | 8574   | 3430   | 5078   | 19133  | 17107  |
| si-ch211-240l19.7 | 51     | 72     | 45     | 46     | 70     | 4      | 14     | 17     |
| dll4              | 3142   | 4268   | 3708   | 3690   | 1068   | 1390   | 5995   | 5099   |
| smad9             | 5246   | 6246   | 5552   | 4528   | 1265   | 1637   | 8330   | 7328   |
| decr2             | 1929   | 2435   | 2362   | 1841   | 692    | 637    | 1424   | 1236   |
| sst1.1            | 3456   | 4398   | 3911   | 3057   | 967    | 724    | 2542   | 2369   |
| LOC559803         | 4059   | 4779   | 4129   | 3555   | 1162   | 1169   | 2856   | 2616   |
| nr0b1             | 1145   | 1576   | 1395   | 1275   | 355    | 310    | 921    | 634    |
| cldn15a           | 3020   | 4032   | 3720   | 3294   | 1178   | 867    | 2374   | 2115   |
| fstb              | 3775   | 5471   | 5210   | 4272   | 1698   | 1985   | 7296   | 6761   |
| si-ch211-89p1.1   | 124    | 234    | 184    | 174    | 100    | 82     | 73     | 62     |
| ugt2a4            | 2290   | 3021   | 2605   | 2404   | 1267   | 905    | 1993   | 1614   |
| ugt5b5p           | 100    | 97     | 88     | 65     | 34     | 6      | 36     | 43     |
| vtnb              | 5502   | 8321   | 7161   | 6296   | 3108   | 2622   | 4890   | 4862   |
| tceb3             | 8186   | 8776   | 7740   | 7086   | 1195   | 1323   | 11800  | 8590   |
| idh1              | 21365  | 27749  | 26375  | 21681  | 12040  | 8938   | 18348  | 15132  |
| rgs5a             | 5962   | 7975   | 6521   | 4697   | 2178   | 3357   | 10168  | 10368  |
| sdr16c5b          | 7807   | 11692  | 10596  | 9469   | 4824   | 3675   | 7401   | 6556   |

|                  |        |        |        |        |        |        |        |        |
|------------------|--------|--------|--------|--------|--------|--------|--------|--------|
| tspan13a         | 1817   | 2497   | 2527   | 2015   | 583    | 484    | 1544   | 1579   |
| grk7b            | 413    | 880    | 775    | 698    | 382    | 270    | 414    | 526    |
| zgc-153723       | 107    | 574    | 216    | 90     | 213    | 283    | 325    | 193    |
| zgc-92005        | 2409   | 3228   | 3189   | 2925   | 1267   | 1356   | 1765   | 1852   |
| hadha            | 3549   | 5238   | 5161   | 4733   | 1857   | 2128   | 3449   | 3382   |
| col8a1a          | 3365   | 6346   | 5274   | 4958   | 3116   | 4993   | 7726   | 7669   |
| slc2a9l1         | 31     | 92     | 26     | 53     | 14     | 29     | 120    | 102    |
| zgc-92030        | 5832   | 9121   | 8253   | 7650   | 3801   | 3271   | 5704   | 5502   |
| slc9a3r1         | 3850   | 5859   | 4469   | 4284   | 2003   | 1374   | 3384   | 3133   |
| thop1            | 1354   | 1384   | 1489   | 1166   | 520    | 507    | 919    | 749    |
| si-dkeyp-119m7.4 | 4545   | 5290   | 5326   | 4348   | 1308   | 1091   | 3112   | 3238   |
| agt              | 6951   | 12207  | 9221   | 6818   | 2153   | 2643   | 18786  | 14164  |
| tspan12          | 2424   | 3757   | 3935   | 3385   | 1181   | 1196   | 2115   | 2117   |
| aldh4a1          | 15694  | 21193  | 18390  | 15719  | 4880   | 4377   | 13409  | 12272  |
| es1              | 47     | 62     | 48     | 40     | 18     | 25     | 213    | 134    |
| zgc-64114        | 16918  | 28201  | 19653  | 22831  | 6877   | 6860   | 34991  | 28742  |
| adrb2b           | 699    | 1056   | 1116   | 1021   | 451    | 354    | 590    | 525    |
| dyrk2            | 8509   | 12141  | 10490  | 9490   | 3192   | 3121   | 6933   | 6748   |
| atp1a1a.2        | 17267  | 23678  | 18768  | 15007  | 5975   | 5139   | 13431  | 14324  |
| dnttip2          | 6687   | 9467   | 6779   | 6324   | 2929   | 3162   | 12000  | 9141   |
| igf2a            | 1586   | 1854   | 1442   | 1066   | 492    | 570    | 2691   | 2272   |
| anpep            | 7723   | 8928   | 7774   | 6025   | 3336   | 2988   | 5446   | 4619   |
| acy3.2           | 1455   | 1793   | 1773   | 1623   | 786    | 660    | 1098   | 904    |
| inhbb            | 2215   | 3363   | 3023   | 2440   | 1058   | 1167   | 4193   | 4133   |
| igfbp6b          | 1193   | 1684   | 1270   | 1334   | 327    | 219    | 835    | 718    |
| si-dkeyp-73d8.9  | 655    | 621    | 328    | 457    | 299    | 242    | 245    | 281    |
| ugt5a1           | 523    | 778    | 528    | 542    | 83     | 68     | 425    | 338    |
| LOC797776        | 802    | 1521   | 1008   | 585    | 445    | 681    | 1329   | 1549   |
| slc4a1           | 4584   | 11209  | 8796   | 6890   | 3861   | 4078   | 13276  | 12444  |
| cdh17            | 17929  | 25229  | 20725  | 17963  | 9031   | 6622   | 15938  | 14327  |
| LOC796505        | 2594   | 3712   | 3485   | 3461   | 850    | 996    | 5041   | 3608   |
| zgc-92851        | 655    | 1182   | 3881   | 7332   | 533    | 359    | 1427   | 1626   |
| zgc-158410       | 7186   | 10644  | 7774   | 6158   | 2810   | 2312   | 7301   | 5545   |
| lox11            | 3955   | 6040   | 5352   | 4512   | 1557   | 1904   | 7181   | 6576   |
| fga              | 17408  | 32457  | 26244  | 22571  | 9493   | 8356   | 24203  | 17625  |
| LOC792509        | 8692   | 10527  | 9942   | 8360   | 3260   | 3543   | 7369   | 5851   |
| arl3l2           | 1701   | 2317   | 2012   | 2275   | 1050   | 924    | 1342   | 1323   |
| wisp3            | 672    | 946    | 967    | 642    | 381    | 291    | 484    | 574    |
| zgc-86586        | 258    | 353    | 290    | 185    | 88     | 91     | 134    | 167    |
| zgc-158374       | 14194  | 21020  | 21495  | 23873  | 9392   | 6775   | 11999  | 11596  |
| si-dkeyp-113d7.4 | 284745 | 406460 | 364778 | 309897 | 156748 | 167560 | 213486 | 234909 |
| aspg             | 7166   | 8271   | 8227   | 6465   | 2203   | 2765   | 12081  | 9894   |
| rab13            | 548    | 957    | 720    | 544    | 321    | 420    | 1389   | 1278   |
| cpt1b            | 3503   | 4670   | 4604   | 3940   | 1043   | 1322   | 3000   | 3291   |
| fabp11b          | 280    | 329    | 326    | 281    | 296    | 569    | 516    | 438    |
| dgat1a           | 4137   | 4986   | 4444   | 4662   | 1307   | 1185   | 3094   | 2991   |
| upp2             | 4353   | 4864   | 3911   | 3347   | 593    | 1193   | 3034   | 2565   |
| dao.1            | 66     | 292    | 321    | 413    | 211    | 244    | 77     | 183    |
| mmp30            | 13102  | 15480  | 13191  | 9251   | 3341   | 2350   | 9921   | 10525  |
| il6st            | 5260   | 9020   | 6908   | 5227   | 1482   | 1974   | 10928  | 9133   |
| slc25a47a        | 6944   | 6305   | 6261   | 6135   | 2457   | 1601   | 4345   | 3701   |

|                 |       |        |       |       |       |       |       |       |
|-----------------|-------|--------|-------|-------|-------|-------|-------|-------|
| cyp8b2          | 123   | 213    | 141   | 134   | 51    | 43    | 78    | 50    |
| msxe            | 299   | 459    | 411   | 331   | 133   | 253   | 667   | 671   |
| dap1b           | 4487  | 5871   | 4869  | 3928  | 1830  | 1509  | 3237  | 3339  |
| zgc-73311       | 6626  | 8448   | 7721  | 5649  | 2652  | 2504  | 5970  | 5308  |
| rasl11b         | 2917  | 3924   | 3462  | 2710  | 1350  | 1592  | 5392  | 4512  |
| tmem86b         | 5629  | 7666   | 7766  | 6919  | 2614  | 2201  | 4813  | 5309  |
| lipc            | 356   | 737    | 677   | 383   | 120   | 299   | 1378  | 668   |
| akr1b1          | 9437  | 12821  | 9929  | 8732  | 4625  | 3460  | 8212  | 7157  |
| si-dkey-127j5.5 | 8587  | 11050  | 9791  | 9358  | 3520  | 4046  | 13765 | 9784  |
| top1mt          | 456   | 627    | 600   | 584   | 310   | 488   | 976   | 678   |
| amy2a           | 99306 | 115954 | 97727 | 61786 | 18435 | 11641 | 76485 | 49106 |
| zgc-153968      | 7278  | 11379  | 8489  | 8728  | 4759  | 3686  | 5943  | 6067  |
| pls1            | 2820  | 3738   | 3336  | 2875  | 1601  | 1131  | 2353  | 2256  |
| zgc-163080      | 4231  | 6264   | 5531  | 4878  | 2521  | 2317  | 3779  | 3433  |
| itgb1bp3        | 8239  | 11830  | 9173  | 7598  | 4875  | 3620  | 7005  | 7060  |
| pllp            | 1399  | 1970   | 1948  | 1626  | 1010  | 675   | 1257  | 1094  |
| bbox1           | 2667  | 4283   | 4159  | 4063  | 1871  | 1390  | 2904  | 2510  |
| fstl1a          | 1168  | 1801   | 1401  | 1186  | 491   | 758   | 2184  | 2145  |
| zgc-173962      | 619   | 1021   | 649   | 535   | 179   | 198   | 476   | 443   |
| ctsk            | 2270  | 3619   | 3133  | 2870  | 1425  | 1870  | 4502  | 3959  |
| rcl1            | 3438  | 4382   | 3534  | 2921  | 1442  | 1778  | 6217  | 4608  |
| rrp9            | 2086  | 3292   | 2547  | 2123  | 1476  | 1731  | 4103  | 3283  |
| slc22a18        | 3365  | 4885   | 4356  | 3916  | 2382  | 1713  | 3061  | 2846  |
| f2              | 9839  | 15278  | 12491 | 11439 | 4975  | 4872  | 9368  | 8795  |
| LOC570267       | 1868  | 2718   | 2166  | 1518  | 739   | 801   | 3917  | 3203  |
| hspa4a          | 4334  | 10875  | 8009  | 8195  | 5396  | 5875  | 12570 | 10572 |
| riok2           | 3627  | 4923   | 4090  | 3501  | 1503  | 2227  | 6220  | 4672  |
| zgc-92113       | 9167  | 11316  | 10530 | 9150  | 3317  | 3888  | 7100  | 7045  |
| atp1a1a.3       | 10616 | 13692  | 11014 | 8737  | 3351  | 2307  | 8303  | 6641  |
| ehhadh          | 2346  | 3479   | 2720  | 2593  | 1084  | 715   | 2065  | 1920  |
| rgs9            | 3844  | 4865   | 4981  | 5109  | 2450  | 2269  | 3073  | 2976  |
| dhrs9           | 6099  | 7928   | 7033  | 6355  | 2448  | 2349  | 5459  | 4399  |
| abcc2           | 35808 | 47098  | 42907 | 33118 | 21623 | 15604 | 28687 | 23261 |
| si-dkey-6n6.1   | 11708 | 17336  | 13217 | 11599 | 4694  | 6909  | 20522 | 20071 |
| cyp1a           | 10857 | 15776  | 11273 | 11798 | 3388  | 3006  | 9608  | 8522  |
| nfe2l1          | 11548 | 12983  | 11165 | 8383  | 1608  | 3465  | 18795 | 17477 |
| ugt1b2          | 1919  | 2755   | 2368  | 2219  | 1044  | 848   | 1596  | 1630  |
| etv5b           | 11884 | 16476  | 14382 | 11866 | 4524  | 5923  | 22090 | 19930 |
| zgc-153151      | 152   | 249    | 273   | 203   | 140   | 68    | 162   | 96    |
| cdc14aa         | 1029  | 1305   | 1180  | 1045  | 419   | 293   | 829   | 776   |
| pdzk1           | 35611 | 44393  | 42917 | 42075 | 14900 | 11777 | 27284 | 23816 |
| LOC791982       | 2190  | 3492   | 2833  | 2526  | 1246  | 1671  | 4175  | 3804  |
| znf395b         | 21646 | 27342  | 25210 | 23773 | 7363  | 5865  | 16718 | 15219 |
| il34            | 5     | 19     | 15    | 4     | 19    | 25    | 37    | 6     |
| tmed1a          | 656   | 962    | 847   | 752   | 339   | 323   | 450   | 507   |
| ugt5b1          | 449   | 814    | 739   | 584   | 253   | 211   | 466   | 338   |
| hmox1           | 1653  | 3445   | 2623  | 2456  | 1208  | 1124  | 1815  | 2128  |
| prmt5           | 2571  | 4069   | 3776  | 2970  | 1572  | 1987  | 5478  | 4629  |
| zgc-85644       | 1878  | 2596   | 2197  | 1966  | 650   | 698   | 1672  | 1472  |
| exosc2          | 1160  | 1695   | 1728  | 1617  | 908   | 890   | 2556  | 1774  |
| epas1b          | 8403  | 10287  | 9909  | 7714  | 2505  | 2957  | 13610 | 12480 |

|                   |        |         |         |         |        |        |        |        |
|-------------------|--------|---------|---------|---------|--------|--------|--------|--------|
| trim55b           | 2684   | 2969    | 2469    | 2133    | 724    | 1160   | 4667   | 3145   |
| zgc-158781        | 399    | 540     | 556     | 547     | 173    | 223    | 818    | 838    |
| slc37a4b          | 6749   | 10351   | 9418    | 8864    | 4072   | 3579   | 6677   | 6468   |
| bms1l             | 7111   | 11183   | 9507    | 8609    | 4254   | 5199   | 13997  | 11149  |
| zgc-165653        | 3043   | 4302    | 3765    | 3427    | 1360   | 1842   | 5703   | 4849   |
| mfsd4a            | 726    | 1088    | 992     | 1040    | 308    | 173    | 544    | 523    |
| wnt2bb            | 263    | 450     | 430     | 312     | 138    | 190    | 531    | 587    |
| angptl7           | 3786   | 5933    | 5259    | 4371    | 2254   | 2461   | 7030   | 7309   |
| smc1a             | 3053   | 4768    | 4118    | 3661    | 1741   | 1690   | 2684   | 2590   |
| rtn2a             | 2829   | 4586    | 4005    | 3624    | 1698   | 1644   | 2712   | 2658   |
| cldn11a           | 2485   | 4082    | 3350    | 3098    | 1208   | 1191   | 4977   | 4433   |
| six7              | 12663  | 25513   | 24230   | 22454   | 4852   | 5534   | 15613  | 18910  |
| zgc-165473        | 661    | 979     | 877     | 900     | 401    | 404    | 612    | 469    |
| krt5              | 963544 | 1262154 | 1183696 | 1146077 | 421138 | 382940 | 763802 | 836430 |
| mid1ip1a          | 8518   | 12457   | 12221   | 13409   | 7609   | 6598   | 15844  | 13329  |
| thnsl2            | 1127   | 1517    | 1669    | 1271    | 835    | 526    | 1028   | 833    |
| as3mt             | 1380   | 2029    | 1960    | 1838    | 573    | 626    | 1198   | 1016   |
| zgc-162269        | 1575   | 2235    | 1730    | 1402    | 628    | 677    | 2872   | 2295   |
| pparab            | 893    | 1231    | 990     | 935     | 178    | 108    | 671    | 468    |
| iars              | 34143  | 47154   | 42819   | 37043   | 14391  | 16732  | 62164  | 46031  |
| bcmo1             | 4794   | 5519    | 4437    | 3620    | 1416   | 1440   | 3392   | 3076   |
| aca2              | 12195  | 17720   | 18985   | 16865   | 7707   | 7990   | 12507  | 11684  |
| gnl3              | 6603   | 10324   | 8752    | 7952    | 4623   | 4971   | 13085  | 10164  |
| zgc-162909        | 461    | 748     | 607     | 628     | 427    | 543    | 981    | 883    |
| plek2             | 731    | 1115    | 1229    | 1086    | 381    | 533    | 1761   | 1536   |
| ddx54             | 10629  | 14363   | 13171   | 13236   | 5294   | 6016   | 19259  | 14073  |
| nme2a             | 1927   | 2238    | 1753    | 1369    | 610    | 594    | 1624   | 1257   |
| aars              | 32854  | 45368   | 38652   | 32526   | 14722  | 17059  | 60982  | 45374  |
| zgc-55512         | 5271   | 7234    | 5573    | 4991    | 1637   | 1887   | 9390   | 8935   |
| ca15c             | 821    | 1519    | 687     | 642     | 222    | 183    | 891    | 1676   |
| zgc-172290        | 34     | 20      | 27      | 14      | 12     | 8      | 62     | 52     |
| serpinc1          | 13858  | 18902   | 13683   | 11335   | 4362   | 4677   | 12006  | 11561  |
| si-ch211-107o23.1 | 972    | 1330    | 1072    | 716     | 246    | 353    | 1870   | 1114   |
| slc2a10           | 249    | 392     | 394     | 270     | 126    | 229    | 563    | 533    |
| slc7a2            | 5689   | 7363    | 6078    | 4835    | 2065   | 2012   | 4471   | 4328   |
| zgc-113054        | 2784   | 3666    | 3390    | 3309    | 1056   | 1629   | 5467   | 4303   |
| pygb              | 8088   | 13163   | 10837   | 8356    | 4276   | 3627   | 7950   | 8048   |
| zgc-56466         | 2039   | 3000    | 2797    | 2550    | 1118   | 904    | 2156   | 1654   |
| hyou1             | 2694   | 5216    | 4550    | 3795    | 2822   | 3011   | 6751   | 5396   |
| mb                | 10790  | 16484   | 12631   | 12557   | 6348   | 9618   | 19783  | 17332  |
| sesn1             | 113810 | 129561  | 109185  | 84770   | 29081  | 19852  | 84507  | 77795  |
| prox2             | 1281   | 1920    | 1615    | 1471    | 521    | 476    | 985    | 1215   |
| aldh2b            | 1038   | 1447    | 1271    | 1110    | 650    | 450    | 872    | 877    |
| cx50.5            | 711    | 1192    | 1001    | 991     | 405    | 390    | 621    | 728    |
| zgc-112350        | 3889   | 5040    | 4422    | 4268    | 1577   | 1803   | 6301   | 4477   |
| zgc-162301        | 1437   | 2138    | 1731    | 1509    | 759    | 704    | 2575   | 2046   |
| atp2b1b           | 6134   | 7849    | 6889    | 6127    | 2558   | 2780   | 5055   | 4986   |
| oat               | 5209   | 7455    | 6220    | 5327    | 3144   | 3202   | 8376   | 7005   |
| gata1a            | 173    | 464     | 430     | 297     | 130    | 159    | 666    | 578    |
| rbm28             | 4711   | 6210    | 5374    | 5264    | 2221   | 2790   | 7810   | 6599   |
| kpna2             | 1855   | 3670    | 3764    | 2998    | 2216   | 3116   | 5139   | 4937   |

|                 |       |       |       |       |       |       |       |       |
|-----------------|-------|-------|-------|-------|-------|-------|-------|-------|
| noc2l           | 6475  | 8641  | 7737  | 6340  | 2779  | 2964  | 11894 | 8984  |
| zgc-101710      | 1978  | 2905  | 2705  | 2344  | 1086  | 947   | 1787  | 2037  |
| slc4a2b         | 6001  | 8727  | 7304  | 5934  | 1938  | 2427  | 10783 | 8806  |
| zgc-55418       | 10385 | 15088 | 12265 | 9421  | 4350  | 5224  | 18759 | 18500 |
| zgc-103438      | 725   | 1263  | 914   | 795   | 413   | 376   | 709   | 750   |
| ugt1b7          | 2364  | 3312  | 2872  | 2701  | 1294  | 1035  | 1984  | 2040  |
| angpt2          | 126   | 219   | 224   | 183   | 114   | 73    | 322   | 336   |
| crfb12          | 743   | 1046  | 959   | 697   | 366   | 525   | 1219  | 1714  |
| cthl            | 796   | 1170  | 1387  | 958   | 465   | 279   | 946   | 649   |
| cyp2aa2         | 330   | 403   | 304   | 303   | 102   | 67    | 205   | 196   |
| zgc-101650      | 812   | 1082  | 1025  | 779   | 370   | 576   | 1575  | 1441  |
| zgc-113232      | 12597 | 21140 | 18987 | 19136 | 14091 | 14098 | 13974 | 11758 |
| dnajc21         | 636   | 1055  | 857   | 943   | 786   | 674   | 1409  | 1053  |
| pdap1           | 2405  | 3099  | 3087  | 2863  | 1413  | 2079  | 3524  | 3276  |
| zgc-171663      | 980   | 1532  | 1540  | 1650  | 601   | 422   | 876   | 1152  |
| iclp1           | 505   | 679   | 575   | 485   | 203   | 188   | 264   | 243   |
| hmgcra          | 3336  | 5671  | 4426  | 6046  | 2524  | 1374  | 6932  | 5457  |
| slc35b4         | 2479  | 3647  | 3832  | 2999  | 1683  | 1049  | 2449  | 2326  |
| zgc-172295      | 2245  | 3217  | 3006  | 2850  | 1160  | 879   | 2017  | 1915  |
| slc6a5          | 2379  | 3304  | 2656  | 2692  | 830   | 926   | 1850  | 1911  |
| obfc2aa         | 927   | 1586  | 1308  | 1093  | 531   | 779   | 2071  | 1822  |
| slc35d1b        | 1184  | 1611  | 1496  | 1004  | 711   | 490   | 879   | 957   |
| mir729          | 11    | 14    | 8     | 6     | 0     | 0     | 2     | 0     |
| si-dkey-185l3.3 | 762   | 1210  | 1377  | 1176  | 485   | 369   | 852   | 760   |
| tacc3           | 1139  | 1937  | 1742  | 1594  | 1011  | 1694  | 2626  | 2696  |
| slco2a1         | 2178  | 2826  | 2096  | 1816  | 611   | 452   | 1628  | 1551  |
| scn4bb          | 1206  | 1565  | 1495  | 1215  | 248   | 377   | 1120  | 863   |
| c8a             | 2204  | 3072  | 3174  | 2510  | 1157  | 1257  | 2078  | 1820  |
| vdra            | 3955  | 5403  | 5111  | 5241  | 609   | 629   | 3511  | 2991  |
| twistnb         | 1594  | 2207  | 2183  | 2172  | 1036  | 1135  | 2958  | 2094  |
| ctssb.2         | 2412  | 3253  | 2522  | 2151  | 946   | 1159  | 3754  | 3539  |
| surf6           | 1341  | 1821  | 1512  | 1588  | 862   | 1118  | 2171  | 1799  |
| acox3           | 2803  | 3702  | 3315  | 2619  | 1001  | 918   | 2427  | 2269  |
| ctbp2l          | 6552  | 10524 | 9643  | 9707  | 2808  | 2714  | 6303  | 6193  |
| nmnat1          | 2826  | 4471  | 3279  | 3070  | 1122  | 1582  | 4976  | 4413  |
| zgc-92712       | 763   | 1054  | 982   | 865   | 346   | 453   | 655   | 602   |
| mid1ip1b        | 5068  | 7006  | 5270  | 4147  | 1574  | 1581  | 10196 | 8169  |
| zgc-112374      | 1074  | 1596  | 1219  | 903   | 335   | 326   | 910   | 910   |
| zgc-55671       | 7564  | 11033 | 8573  | 7415  | 3565  | 3830  | 13024 | 12344 |
| zgc-110286      | 79    | 139   | 89    | 129   | 46    | 38    | 193   | 114   |
| zgc-154086      | 352   | 620   | 495   | 473   | 163   | 200   | 799   | 655   |
| ddt             | 4490  | 6278  | 5504  | 3939  | 1460  | 1404  | 4178  | 4060  |
| slc5a2          | 1611  | 2007  | 2007  | 1812  | 544   | 450   | 1099  | 1314  |
| zgc-92127       | 1982  | 2734  | 2263  | 2197  | 1237  | 1527  | 3382  | 2716  |
| chrm5a          | 476   | 590   | 470   | 476   | 131   | 108   | 357   | 236   |
| cryaa           | 16884 | 24963 | 18038 | 19514 | 6089  | 5706  | 12786 | 15626 |
| cryz            | 1969  | 2486  | 2240  | 2373  | 957   | 764   | 1653  | 1647  |
| acat1           | 26841 | 36204 | 30234 | 26464 | 10442 | 9456  | 23735 | 22017 |
| adh8a           | 493   | 509   | 527   | 333   | 134   | 76    | 344   | 207   |
| prdx2           | 60196 | 83423 | 71469 | 60547 | 27308 | 22495 | 53173 | 49656 |
| s100a10a        | 19164 | 24145 | 20584 | 17716 | 6964  | 5656  | 14913 | 13208 |

|              |       |        |       |       |       |       |       |       |
|--------------|-------|--------|-------|-------|-------|-------|-------|-------|
| zgc-136858   | 2209  | 3144   | 2729  | 2555  | 928   | 742   | 2044  | 1897  |
| LOC100003647 | 669   | 7926   | 3258  | 1738  | 959   | 637   | 3190  | 3151  |
| cirh1a       | 7179  | 8596   | 7200  | 5668  | 2092  | 2532  | 11787 | 8046  |
| zgc-136902   | 2486  | 3472   | 2483  | 2723  | 1136  | 710   | 2141  | 2145  |
| ugt1b5       | 1917  | 2806   | 2393  | 2208  | 1076  | 861   | 1706  | 1734  |
| tmem37       | 814   | 1320   | 1236  | 1227  | 372   | 300   | 752   | 749   |
| bxdc2        | 4860  | 7142   | 6001  | 6191  | 2792  | 3175  | 9024  | 6471  |
| crabp1a      | 1911  | 2641   | 2411  | 2393  | 966   | 1471  | 3669  | 2764  |
| fam73a       | 3910  | 4575   | 3882  | 3248  | 1294  | 1965  | 5811  | 5409  |
| zgc-112242   | 1279  | 1346   | 1281  | 1268  | 479   | 595   | 2213  | 1639  |
| nol10        | 6550  | 8752   | 7367  | 7080  | 2927  | 3388  | 11268 | 8609  |
| hk2          | 1656  | 3113   | 2562  | 1985  | 1367  | 1261  | 3959  | 2934  |
| prmt3        | 3135  | 4165   | 3371  | 2802  | 1205  | 1435  | 5386  | 4157  |
| LOC100151110 | 12197 | 16444  | 14400 | 12044 | 4602  | 4351  | 10502 | 9866  |
| syncrpl      | 5309  | 8262   | 7126  | 6711  | 3079  | 3894  | 10468 | 8766  |
| ttr          | 7448  | 8250   | 6541  | 5844  | 2590  | 3437  | 4834  | 5605  |
| nat10        | 5585  | 7827   | 6365  | 5032  | 2710  | 2954  | 9804  | 8169  |
| tmem30c      | 3011  | 4292   | 3746  | 2697  | 1087  | 746   | 2521  | 2496  |
| rbks         | 592   | 907    | 888   | 823   | 444   | 355   | 559   | 492   |
| crygm3       | 244   | 354    | 367   | 217   | 77    | 120   | 533   | 391   |
| cyp4t8       | 4343  | 5533   | 4625  | 3484  | 1571  | 1253  | 3953  | 2981  |
| rrh          | 1618  | 1892   | 1867  | 1651  | 688   | 669   | 1192  | 1121  |
| slc15a1b     | 33879 | 45819  | 35800 | 30400 | 10739 | 7346  | 30850 | 25461 |
| rp42-pen     | 4970  | 6763   | 5707  | 5211  | 1915  | 2989  | 8271  | 8484  |
| bcat1        | 3798  | 4558   | 3899  | 3089  | 1034  | 1621  | 6237  | 5020  |
| pea3         | 5968  | 8507   | 7300  | 6001  | 1942  | 2584  | 10187 | 10006 |
| dnajb1b      | 963   | 1273   | 1084  | 989   | 435   | 499   | 1824  | 1157  |
| guk1         | 2178  | 2393   | 2017  | 1582  | 856   | 1086  | 1587  | 1495  |
| rrp15        | 1985  | 2947   | 2396  | 2809  | 1884  | 2688  | 3386  | 2670  |
| LOC565335    | 1046  | 1455   | 1104  | 865   | 288   | 367   | 1809  | 1545  |
| zgc-195195   | 29    | 127    | 76    | 46    | 12    | 71    | 72    | 58    |
| abcg4b       | 180   | 256    | 186   | 130   | 65    | 122   | 381   | 308   |
| cldn1        | 11511 | 15860  | 13979 | 14838 | 4342  | 3608  | 9006  | 10058 |
| zgc-171476   | 2659  | 3564   | 3034  | 2874  | 1214  | 1371  | 4312  | 3398  |
| c6ast4       | 81884 | 115037 | 99827 | 66249 | 17491 | 9374  | 71252 | 57730 |
| ptk6b        | 1335  | 1858   | 1712  | 1360  | 545   | 476   | 1311  | 1165  |
| cyp17a1      | 744   | 1066   | 799   | 783   | 284   | 278   | 646   | 463   |
| gtpbp10      | 1911  | 2613   | 2045  | 1609  | 564   | 761   | 3490  | 2888  |
| wnt9b        | 843   | 1191   | 1171  | 923   | 423   | 602   | 1663  | 1399  |
| zgc-162337   | 8323  | 8461   | 7268  | 6023  | 2510  | 2010  | 6181  | 6206  |
| abce1        | 18245 | 27941  | 21945 | 18974 | 9544  | 10853 | 34838 | 26468 |
| nola1        | 4360  | 6495   | 6078  | 5359  | 3101  | 3857  | 9108  | 7358  |
| ttc27        | 5624  | 7537   | 6571  | 6269  | 2607  | 2771  | 10005 | 7269  |
| cbsb         | 19585 | 23231  | 17016 | 14960 | 6562  | 4480  | 14322 | 11869 |
| ppp2r2c      | 6441  | 8314   | 7299  | 6464  | 2161  | 1995  | 6006  | 4764  |
| kdr          | 2615  | 4364   | 3305  | 2728  | 859   | 1127  | 4947  | 4151  |
| ddx49        | 1361  | 1808   | 1703  | 1340  | 618   | 627   | 2457  | 2047  |
| pbp          | 5655  | 7502   | 6477  | 5644  | 2343  | 2214  | 5570  | 4950  |
| smtnl        | 4965  | 6914   | 4883  | 4669  | 1952  | 2089  | 8281  | 7207  |
| zgc-195063   | 3687  | 6439   | 5807  | 5536  | 1298  | 1366  | 3829  | 4196  |
| iqgap2       | 2873  | 4656   | 4076  | 3538  | 1611  | 1263  | 3167  | 2677  |



|                  |        |        |        |        |        |        |        |        |
|------------------|--------|--------|--------|--------|--------|--------|--------|--------|
| ido1             | 808    | 1162   | 809    | 978    | 436    | 407    | 746    | 606    |
| vgll2b           | 5222   | 7544   | 7559   | 7832   | 1646   | 2935   | 9077   | 8300   |
| ugt1b3           | 1774   | 2575   | 2238   | 2101   | 1004   | 814    | 1579   | 1610   |
| slc1a1           | 5774   | 8022   | 6340   | 5152   | 2248   | 2282   | 5289   | 4707   |
| zgc-55813        | 46482  | 64448  | 49728  | 42177  | 17610  | 21400  | 83761  | 75042  |
| atp1b2b          | 6707   | 9270   | 8287   | 6668   | 3575   | 3303   | 6206   | 5714   |
| gpd1             | 17208  | 23621  | 22057  | 21241  | 9467   | 8215   | 15031  | 13997  |
| hgd              | 20317  | 20608  | 17818  | 13598  | 4804   | 4010   | 14472  | 12305  |
| col28a1a         | 1852   | 2910   | 2787   | 2140   | 1227   | 1185   | 1515   | 1762   |
| zgc-123333       | 9310   | 13994  | 14024  | 11700  | 4574   | 2906   | 8546   | 7974   |
| acad8            | 3635   | 5448   | 4397   | 3971   | 2011   | 1399   | 3391   | 3039   |
| memo1            | 2339   | 3657   | 3413   | 2979   | 1142   | 1118   | 4759   | 4960   |
| ptgds            | 36617  | 31425  | 29470  | 21060  | 6534   | 6572   | 27236  | 20813  |
| zgc-136472       | 2489   | 3151   | 2540   | 2181   | 959    | 781    | 2186   | 1853   |
| bhmt             | 269929 | 378537 | 367128 | 365968 | 106292 | 114809 | 228011 | 215165 |
| hspa5            | 15041  | 27287  | 25930  | 22749  | 15693  | 15373  | 35708  | 27149  |
| thbs3a           | 2727   | 3561   | 3501   | 3081   | 1480   | 1750   | 4676   | 4646   |
| utp15            | 3531   | 5004   | 3888   | 3725   | 1595   | 1767   | 6217   | 4795   |
| si-dkey-25o1.2   | 1841   | 2302   | 2286   | 1236   | 506    | 511    | 1382   | 1599   |
| ugt1b4           | 1776   | 2567   | 2228   | 2090   | 999    | 818    | 1578   | 1607   |
| myoz1b           | 30428  | 37580  | 31479  | 25986  | 10824  | 11949  | 22978  | 23092  |
| galnt10          | 3763   | 4998   | 5342   | 5543   | 2298   | 1610   | 3450   | 3027   |
| pdcd11           | 11733  | 16903  | 13804  | 11992  | 5566   | 6425   | 21550  | 17520  |
| bin2a            | 3177   | 4277   | 3692   | 3410   | 2032   | 1640   | 2829   | 2403   |
| LOC100003253     | 50     | 87     | 88     | 37     | 32     | 29     | 151    | 180    |
| guca1e           | 396    | 747    | 429    | 455    | 47     | 60     | 322    | 411    |
| hmbsb            | 614    | 1406   | 972    | 784    | 716    | 714    | 1621   | 1584   |
| zgc-110388       | 2064   | 3118   | 2144   | 1963   | 1246   | 1443   | 4000   | 3051   |
| ppan             | 2623   | 3549   | 2791   | 2538   | 1341   | 1760   | 4443   | 3481   |
| hmga1a           | 58127  | 95577  | 93632  | 87600  | 45942  | 60389  | 120981 | 122895 |
| pkhd111          | 9730   | 14566  | 9189   | 8735   | 4665   | 4432   | 14442  | 13873  |
| tgm2             | 4617   | 6747   | 6138   | 6229   | 2468   | 3476   | 4037   | 4553   |
| slc12a9          | 3268   | 4240   | 3733   | 3261   | 1142   | 937    | 5195   | 4446   |
| ccdc3            | 205    | 294    | 258    | 221    | 69     | 148    | 434    | 315    |
| pdia2            | 9361   | 14179  | 11074  | 7145   | 2840   | 2476   | 9459   | 7836   |
| zgc-110447       | 224    | 410    | 275    | 194    | 104    | 70     | 504    | 464    |
| mipb             | 45463  | 61813  | 62391  | 62258  | 23818  | 25964  | 39543  | 39708  |
| arrdc2           | 33770  | 47516  | 31356  | 24519  | 11454  | 12664  | 59533  | 49308  |
| zgc-153997       | 18269  | 29171  | 29353  | 28950  | 7593   | 9461   | 37910  | 34097  |
| zgc-136337       | 25278  | 41722  | 43275  | 43732  | 9968   | 9929   | 26868  | 28918  |
| si-ch211-244h7.4 | 446    | 536    | 410    | 302    | 205    | 132    | 216    | 268    |
| fhl2b            | 1683   | 1744   | 1193   | 885    | 379    | 248    | 1068   | 1009   |
| cnksr1           | 2674   | 3831   | 3507   | 2601   | 1058   | 1406   | 4456   | 3802   |
| rdh10a           | 6372   | 9040   | 7839   | 5961   | 3094   | 4118   | 10992  | 9798   |
| LOC796384        | 2203   | 3809   | 2928   | 4148   | 1742   | 957    | 4636   | 3497   |
| nip7             | 1486   | 2015   | 1662   | 1279   | 801    | 956    | 2436   | 2070   |
| zgc-101744       | 6764   | 9918   | 8006   | 6410   | 2423   | 2463   | 6433   | 6231   |
| cyp2aa3          | 144    | 276    | 195    | 138    | 56     | 24     | 90     | 165    |
| riok3            | 6741   | 9286   | 7677   | 6433   | 2679   | 3062   | 11203  | 9716   |
| pwp2h            | 3149   | 4698   | 4134   | 3491   | 1763   | 1979   | 6319   | 4998   |
| flvcr1           | 2137   | 3200   | 2550   | 2572   | 949    | 659    | 2022   | 1795   |

|                   |         |         |         |         |        |        |         |         |
|-------------------|---------|---------|---------|---------|--------|--------|---------|---------|
| ctssb.1           | 599     | 1161    | 986     | 696     | 442    | 317    | 1485    | 1127    |
| insl5a            | 442     | 671     | 592     | 733     | 333    | 215    | 323     | 369     |
| acadm             | 23733   | 31009   | 27337   | 23724   | 9799   | 9992   | 21195   | 19540   |
| si-ch211-215l11.5 | 48498   | 65540   | 57448   | 49284   | 23311  | 16262  | 43811   | 44806   |
| atp1a1a.5         | 3232    | 5008    | 3434    | 3138    | 993    | 789    | 2944    | 2660    |
| LOC554843         | 1359    | 1760    | 1559    | 1635    | 653    | 518    | 1145    | 1164    |
| cmklr1            | 542     | 807     | 680     | 527     | 286    | 235    | 1124    | 944     |
| zgc-65772         | 6580    | 9115    | 9487    | 10681   | 3249   | 3704   | 11652   | 9353    |
| ckma              | 1692005 | 2164871 | 1925499 | 1691146 | 623864 | 505960 | 1541641 | 1244721 |
| fbxo30            | 911     | 1712    | 1041    | 890     | 270    | 341    | 1918    | 1496    |
| cdk5r2b           | 8373    | 10168   | 8941    | 7779    | 2236   | 2552   | 7487    | 6842    |
| zgc-172142        | 673     | 1065    | 824     | 779     | 329    | 352    | 1250    | 1061    |
| noc4l             | 2122    | 3019    | 2500    | 2074    | 1266   | 1081   | 3801    | 3168    |
| pthr1             | 219     | 392     | 276     | 283     | 102    | 158    | 500     | 423     |
| dhdhl             | 7683    | 11298   | 9077    | 8173    | 4264   | 2946   | 7644    | 6249    |
| ugt2a2            | 2482    | 3373    | 2928    | 2582    | 1423   | 1005   | 2384    | 1925    |
| heatr3            | 3296    | 4716    | 4157    | 3459    | 1793   | 1716   | 6410    | 4806    |
| npm1              | 14264   | 22147   | 17797   | 15484   | 9101   | 10596  | 25315   | 21940   |
| plxnd1            | 3731    | 6043    | 5608    | 4877    | 931    | 1200   | 6618    | 5702    |
| relt              | 1987    | 2632    | 2517    | 2577    | 767    | 855    | 3691    | 3169    |
| si-dkeyp-95d10.1  | 4195    | 5715    | 4227    | 3761    | 1387   | 906    | 3477    | 3180    |
| zgc-85869         | 1411    | 2179    | 1975    | 1573    | 929    | 1097   | 3004    | 2734    |
| mak16             | 2695    | 3745    | 2975    | 2531    | 1475   | 1914   | 4627    | 3313    |
| zgc-55307         | 13770   | 19179   | 14273   | 12195   | 5301   | 6260   | 23030   | 20707   |
| ciapin1           | 2364    | 3412    | 2833    | 2387    | 1323   | 1581   | 4201    | 3111    |
| manf              | 496     | 1236    | 1042    | 927     | 654    | 728    | 1403    | 1328    |
| wu-fb12e11        | 4655    | 6976    | 6056    | 4949    | 1960   | 2498   | 8176    | 7896    |
| zgc-194158        | 879     | 1090    | 863     | 752     | 361    | 285    | 630     | 676     |
| si-dkeyp-84a8.8   | 1592    | 2178    | 1692    | 1454    | 644    | 803    | 2765    | 2258    |
| dtwd1             | 1462    | 1994    | 1839    | 1768    | 577    | 608    | 2544    | 1945    |
| lpin1             | 77223   | 93679   | 68911   | 59688   | 20268  | 15096  | 60632   | 54513   |
| nmd3              | 11118   | 13654   | 11890   | 10020   | 4088   | 4647   | 17184   | 12191   |
| arl3l1            | 2008    | 2492    | 1854    | 1688    | 605    | 629    | 1771    | 1608    |
| LOC100005405      | 1       | 6       | 0       | 2       | 0      | 2      | 8       | 9       |
| prrx1b            | 1221    | 1944    | 1595    | 1432    | 907    | 1196   | 2433    | 2174    |
| paics             | 9006    | 15967   | 13090   | 12497   | 5348   | 6319   | 8382    | 11976   |
| tpa               | 2446    | 3149    | 2563    | 1961    | 505    | 530    | 2134    | 1885    |
| or109-11          | 48      | 111     | 81      | 89      | 40     | 22     | 49      | 29      |
| gatm              | 57205   | 119201  | 116365  | 126196  | 54354  | 57881  | 71501   | 66971   |
| zgc-153921        | 67      | 116     | 92      | 73      | 39     | 57     | 49      | 24      |
| wee1              | 973     | 1599    | 1499    | 1355    | 662    | 813    | 2325    | 2012    |
| ckmb              | 1464738 | 1883491 | 1689870 | 1487995 | 606628 | 510763 | 1330299 | 1085593 |
| rbfox1l           | 14013   | 19739   | 19402   | 19738   | 6435   | 7182   | 12584   | 11454   |
| rrbp1             | 8943    | 11665   | 10824   | 10142   | 5165   | 4112   | 8103    | 6273    |
| dhrr3a            | 2231    | 3708    | 2682    | 2385    | 1074   | 1259   | 4483    | 4000    |
| clu               | 7765    | 10796   | 8640    | 7476    | 4122   | 4793   | 12583   | 10012   |
| si-ch211-219a15.3 | 830     | 1246    | 1036    | 1015    | 219    | 302    | 837     | 778     |
| psme3             | 2185    | 3177    | 2399    | 2011    | 1227   | 1506   | 3890    | 3413    |
| tecrb             | 13616   | 19654   | 17438   | 16247   | 6821   | 5898   | 12081   | 12646   |
| tsen54            | 2459    | 2966    | 2673    | 2325    | 798    | 1052   | 3383    | 2755    |
| zgc-113651        | 38      | 120     | 61      | 59      | 30     | 40     | 174     | 76      |

|                 |       |        |        |       |       |       |       |       |
|-----------------|-------|--------|--------|-------|-------|-------|-------|-------|
| foxe3           | 220   | 315    | 270    | 354   | 84    | 96    | 170   | 167   |
| faah            | 646   | 896    | 1098   | 617   | 336   | 270   | 644   | 509   |
| anxa5b          | 9845  | 15813  | 13427  | 10051 | 4907  | 3799  | 10285 | 10179 |
| si-dkey-25e12.3 | 88    | 305    | 169    | 145   | 102   | 149   | 303   | 237   |
| zgc-109982      | 170   | 315    | 259    | 233   | 94    | 94    | 169   | 145   |
| pts             | 4375  | 7276   | 7448   | 7969  | 5550  | 4111  | 3850  | 4097  |
| hig1            | 5042  | 7085   | 5064   | 5385  | 1936  | 2580  | 8116  | 6913  |
| hnmt            | 457   | 575    | 572    | 393   | 321   | 247   | 285   | 305   |
| zgc-136406      | 575   | 914    | 759    | 542   | 207   | 355   | 1167  | 1030  |
| si-dkey-32m20.1 | 151   | 232    | 222    | 198   | 58    | 24    | 107   | 107   |
| ucll1           | 854   | 1168   | 1119   | 941   | 442   | 381   | 749   | 756   |
| zgc-101594      | 870   | 1161   | 726    | 713   | 406   | 300   | 1523  | 1270  |
| zgc-193505      | 7576  | 10166  | 8352   | 8365  | 3034  | 4117  | 10903 | 13556 |
| zgc-91957       | 2731  | 4584   | 3631   | 2965  | 1844  | 1938  | 5262  | 4153  |
| zgc-91787       | 786   | 1077   | 835    | 556   | 406   | 513   | 1523  | 1262  |
| irf3            | 212   | 289    | 186    | 145   | 44    | 62    | 443   | 329   |
| si-rp71-1g18.11 | 179   | 231    | 239    | 162   | 69    | 50    | 136   | 115   |
| tfr1b           | 1125  | 2064   | 1516   | 1141  | 702   | 1339  | 2581  | 1951  |
| ddx56           | 2963  | 4279   | 3330   | 2876  | 1437  | 1634  | 5351  | 4272  |
| aldh6a1         | 99256 | 122103 | 108955 | 93340 | 36185 | 29453 | 79847 | 69445 |

| VD-4   | VD-5   | foldChang | pval     | padj     |
|--------|--------|-----------|----------|----------|
| 315075 | 309998 | 7.91498   | 1.03E-89 | 8.34E-86 |
| 366    | 152    | 0.068542  | 1.19E-89 | 8.34E-86 |
| 268555 | 305346 | 7.356439  | 4.25E-83 | 1.99E-79 |
| 31     | 114    | 0.086611  | 4.52E-78 | 1.59E-74 |
| 407    | 592    | 0.177533  | 1.47E-76 | 4.12E-73 |
| 32     | 92     | 0.088689  | 4.42E-73 | 1.03E-69 |
| 38919  | 39140  | 5.085264  | 8.97E-64 | 1.80E-60 |
| 2657   | 2546   | 0.206711  | 2.07E-60 | 3.64E-57 |
| 1626   | 2208   | 0.215502  | 7.13E-59 | 1.11E-55 |
| 683    | 899    | 0.193071  | 2.07E-57 | 2.91E-54 |
| 10434  | 2291   | 4.246515  | 5.07E-56 | 6.47E-53 |
| 1385   | 1312   | 0.252969  | 1.22E-53 | 1.43E-50 |
| 271    | 248    | 0.163441  | 1.46E-51 | 1.58E-48 |
| 21646  | 43811  | 0.21793   | 5.40E-46 | 5.41E-43 |
| 59     | 84     | 0.186298  | 4.38E-44 | 4.10E-41 |
| 1577   | 1445   | 0.260295  | 7.88E-44 | 6.92E-41 |
| 19806  | 18945  | 0.228214  | 1.91E-43 | 1.58E-40 |
| 229    | 126    | 0.142689  | 1.35E-41 | 1.05E-38 |
| 30030  | 19165  | 0.230407  | 8.39E-41 | 6.20E-38 |
| 5304   | 9170   | 0.280633  | 1.07E-40 | 7.54E-38 |
| 1503   | 1733   | 0.283678  | 3.89E-40 | 2.60E-37 |
| 1062   | 1181   | 0.29383   | 4.37E-40 | 2.79E-37 |
| 53148  | 31278  | 0.240873  | 2.89E-38 | 1.76E-35 |
| 42     | 67     | 0.214552  | 7.66E-37 | 4.48E-34 |
| 2602   | 3434   | 0.308182  | 8.91E-37 | 5.01E-34 |
| 1615   | 1689   | 0.317107  | 1.06E-36 | 5.72E-34 |
| 1821   | 1929   | 0.325392  | 1.97E-36 | 9.54E-34 |
| 1113   | 1216   | 0.313652  | 1.84E-36 | 9.54E-34 |
| 1045   | 1183   | 0.311807  | 1.97E-36 | 9.54E-34 |
| 1281   | 1374   | 0.316453  | 2.12E-36 | 9.90E-34 |
| 13431  | 14698  | 0.285112  | 2.40E-36 | 1.09E-33 |
| 1155   | 1263   | 0.315376  | 3.55E-36 | 1.56E-33 |
| 460    | 803    | 0.308583  | 1.38E-33 | 5.86E-31 |
| 10636  | 8008   | 0.307964  | 1.84E-33 | 7.62E-31 |
| 385    | 331    | 0.27003   | 1.93E-33 | 7.76E-31 |
| 6812   | 6301   | 0.318877  | 1.23E-32 | 4.80E-30 |
| 9089   | 7835   | 3.162383  | 2.31E-32 | 8.77E-30 |
| 19151  | 5830   | 2.63249   | 2.39E-32 | 8.82E-30 |
| 63663  | 66948  | 0.277565  | 3.11E-32 | 1.12E-29 |
| 1334   | 453    | 4.622466  | 6.66E-32 | 2.34E-29 |
| 228    | 238    | 0.234329  | 1.20E-31 | 4.12E-29 |
| 1035   | 1186   | 0.334071  | 1.63E-31 | 5.44E-29 |
| 109224 | 126504 | 3.207844  | 1.01E-30 | 3.30E-28 |
| 460    | 312    | 0.261821  | 1.96E-30 | 6.26E-28 |
| 27122  | 25797  | 0.281171  | 5.00E-30 | 1.56E-27 |
| 127    | 137    | 0.275152  | 9.64E-29 | 2.94E-26 |
| 95973  | 74398  | 0.300039  | 1.59E-28 | 4.75E-26 |
| 316    | 332    | 0.27415   | 4.80E-28 | 1.40E-25 |
| 27699  | 26486  | 0.324825  | 1.19E-27 | 3.42E-25 |
| 824    | 930    | 0.344149  | 1.80E-27 | 5.05E-25 |

|        |        |          |          |          |
|--------|--------|----------|----------|----------|
| 566    | 456    | 0.301507 | 2.23E-27 | 6.15E-25 |
| 9969   | 16002  | 0.364498 | 3.16E-27 | 8.52E-25 |
| 782    | 155    | 7.97775  | 6.31E-27 | 1.67E-24 |
| 295    | 333    | 0.287911 | 6.89E-27 | 1.79E-24 |
| 287    | 319    | 0.286519 | 8.42E-27 | 2.15E-24 |
| 156    | 147    | 0.210588 | 1.13E-26 | 2.78E-24 |
| 1712   | 1521   | 0.339926 | 1.13E-26 | 2.78E-24 |
| 0      | 1      | 0.063703 | 1.27E-26 | 3.08E-24 |
| 81605  | 99319  | 2.79801  | 1.32E-26 | 3.15E-24 |
| 2088   | 2061   | 0.374649 | 1.36E-26 | 3.19E-24 |
| 10922  | 7762   | 2.678031 | 2.41E-26 | 5.55E-24 |
| 3802   | 4269   | 0.383711 | 4.75E-26 | 1.08E-23 |
| 544    | 694    | 0.306198 | 7.78E-26 | 1.73E-23 |
| 146786 | 185330 | 0.366653 | 8.10E-26 | 1.78E-23 |
| 665    | 656    | 0.375637 | 1.39E-24 | 3.01E-22 |
| 783    | 970    | 0.397328 | 7.82E-24 | 1.66E-21 |
| 1670   | 1933   | 3.355092 | 8.04E-24 | 1.68E-21 |
| 207    | 260    | 0.313087 | 4.50E-23 | 9.30E-21 |
| 18223  | 17773  | 2.569075 | 5.38E-23 | 1.08E-20 |
| 8226   | 7539   | 0.426842 | 5.40E-23 | 1.08E-20 |
| 4418   | 4562   | 0.405094 | 8.96E-23 | 1.77E-20 |
| 7603   | 9291   | 2.612191 | 1.22E-22 | 2.38E-20 |
| 4709   | 4465   | 0.415438 | 1.63E-22 | 3.15E-20 |
| 11347  | 15892  | 0.395896 | 3.21E-22 | 6.09E-20 |
| 34853  | 48473  | 0.390919 | 8.39E-22 | 1.57E-19 |
| 2231   | 656    | 3.453797 | 2.49E-21 | 4.61E-19 |
| 53412  | 76643  | 0.402224 | 3.66E-21 | 6.68E-19 |
| 1121   | 1171   | 0.401279 | 5.09E-21 | 9.17E-19 |
| 3153   | 3098   | 0.38656  | 5.41E-21 | 9.61E-19 |
| 348    | 404    | 6.219543 | 5.62E-21 | 9.87E-19 |
| 364    | 415    | 0.326383 | 7.39E-21 | 1.28E-18 |
| 456    | 396    | 0.36561  | 2.29E-20 | 3.93E-18 |
| 91     | 58     | 0.191137 | 3.22E-20 | 5.44E-18 |
| 1029   | 1111   | 0.409182 | 4.33E-20 | 7.24E-18 |
| 52243  | 65589  | 0.407145 | 4.42E-20 | 7.30E-18 |
| 313    | 280    | 0.318898 | 4.85E-20 | 7.92E-18 |
| 1623   | 1576   | 0.412214 | 5.66E-20 | 9.14E-18 |
| 5010   | 7676   | 2.534833 | 7.95E-20 | 1.27E-17 |
| 397    | 483    | 0.35828  | 1.06E-19 | 1.68E-17 |
| 79     | 192    | 0.399687 | 1.43E-19 | 2.23E-17 |
| 678    | 471    | 0.35884  | 2.13E-19 | 3.25E-17 |
| 2228   | 2073   | 2.770486 | 2.12E-19 | 3.25E-17 |
| 6565   | 5534   | 0.43354  | 3.02E-19 | 4.55E-17 |
| 136    | 154    | 0.305877 | 3.17E-19 | 4.73E-17 |
| 22902  | 24713  | 2.331405 | 5.12E-19 | 7.56E-17 |
| 9497   | 8326   | 0.411276 | 6.66E-19 | 9.75E-17 |
| 448    | 620    | 0.378992 | 6.90E-19 | 9.99E-17 |
| 446    | 619    | 0.338141 | 7.52E-19 | 1.08E-16 |
| 19370  | 2506   | 2.465963 | 9.90E-19 | 1.40E-16 |
| 995    | 1182   | 0.373641 | 2.01E-18 | 2.83E-16 |
| 13565  | 17446  | 2.333835 | 2.06E-18 | 2.86E-16 |

|        |        |          |          |          |
|--------|--------|----------|----------|----------|
| 5469   | 5464   | 0.464375 | 2.92E-18 | 4.02E-16 |
| 41311  | 15669  | 2.076018 | 3.10E-18 | 4.22E-16 |
| 833    | 826    | 0.398811 | 3.27E-18 | 4.41E-16 |
| 1690   | 1666   | 0.42905  | 7.56E-18 | 1.01E-15 |
| 329    | 677    | 0.468526 | 1.00E-17 | 1.33E-15 |
| 416    | 545    | 0.37787  | 1.33E-17 | 1.75E-15 |
| 410    | 386    | 0.38258  | 1.62E-17 | 2.11E-15 |
| 3249   | 3853   | 0.460237 | 1.64E-17 | 2.11E-15 |
| 2335   | 1000   | 2.606823 | 1.67E-17 | 2.13E-15 |
| 2888   | 2942   | 0.457503 | 2.58E-17 | 3.26E-15 |
| 11     | 21     | 0.203358 | 2.85E-17 | 3.57E-15 |
| 712    | 806    | 0.429307 | 3.52E-17 | 4.37E-15 |
| 494    | 860    | 0.435447 | 4.98E-17 | 6.14E-15 |
| 30805  | 35119  | 2.35363  | 5.68E-17 | 6.94E-15 |
| 1962   | 1818   | 0.442654 | 6.44E-17 | 7.80E-15 |
| 5958   | 4826   | 2.295425 | 7.33E-17 | 8.80E-15 |
| 4773   | 3866   | 0.464875 | 1.14E-16 | 1.36E-14 |
| 24612  | 27094  | 2.252332 | 1.25E-16 | 1.47E-14 |
| 3566   | 3222   | 0.455504 | 1.35E-16 | 1.58E-14 |
| 2694   | 3325   | 0.489619 | 1.82E-16 | 2.11E-14 |
| 782    | 721    | 3.104107 | 1.96E-16 | 2.26E-14 |
| 1204   | 1506   | 0.444703 | 3.01E-16 | 3.44E-14 |
| 124266 | 95251  | 0.436368 | 3.35E-16 | 3.80E-14 |
| 746    | 667    | 0.401598 | 6.20E-16 | 6.97E-14 |
| 14393  | 13730  | 2.120343 | 6.61E-16 | 7.37E-14 |
| 9391   | 9395   | 0.480613 | 1.01E-15 | 1.12E-13 |
| 3433   | 2777   | 0.44873  | 1.07E-15 | 1.18E-13 |
| 141    | 168    | 0.327169 | 1.54E-15 | 1.68E-13 |
| 1799   | 1955   | 0.467296 | 1.56E-15 | 1.69E-13 |
| 204724 | 152310 | 0.427169 | 1.69E-15 | 1.81E-13 |
| 9489   | 10234  | 0.464542 | 2.53E-15 | 2.69E-13 |
| 341    | 395    | 0.403508 | 2.65E-15 | 2.80E-13 |
| 5801   | 8235   | 0.519105 | 2.90E-15 | 3.04E-13 |
| 7156   | 6998   | 0.476028 | 3.00E-15 | 3.12E-13 |
| 681    | 635    | 0.401612 | 3.28E-15 | 3.39E-13 |
| 4668   | 4982   | 2.148843 | 3.34E-15 | 3.40E-13 |
| 6      | 15     | 0.085114 | 3.34E-15 | 3.40E-13 |
| 4682   | 4571   | 0.496586 | 3.80E-15 | 3.84E-13 |
| 3525   | 3264   | 2.267774 | 3.85E-15 | 3.87E-13 |
| 792    | 764    | 3.220421 | 4.12E-15 | 4.10E-13 |
| 6815   | 6601   | 1.966785 | 5.30E-15 | 5.24E-13 |
| 1453   | 1417   | 0.454049 | 5.39E-15 | 5.30E-13 |
| 11459  | 12994  | 0.481676 | 9.81E-15 | 9.57E-13 |
| 4490   | 4378   | 0.481557 | 1.09E-14 | 1.05E-12 |
| 13490  | 14853  | 0.480452 | 1.21E-14 | 1.17E-12 |
| 425    | 387    | 0.378958 | 1.58E-14 | 1.51E-12 |
| 2081   | 1794   | 0.463957 | 1.69E-14 | 1.60E-12 |
| 12378  | 15113  | 0.490547 | 1.81E-14 | 1.70E-12 |
| 23651  | 16934  | 0.458214 | 1.95E-14 | 1.83E-12 |
| 3166   | 3439   | 0.468809 | 2.09E-14 | 1.94E-12 |
| 1116   | 1434   | 0.449114 | 3.47E-14 | 3.21E-12 |

|         |         |          |          |          |
|---------|---------|----------|----------|----------|
| 2405    | 2598    | 0.4803   | 4.15E-14 | 3.81E-12 |
| 73      | 102     | 0.272965 | 4.47E-14 | 4.08E-12 |
| 13627   | 15856   | 0.505071 | 5.57E-14 | 5.05E-12 |
| 5373    | 5462    | 0.502748 | 7.02E-14 | 6.32E-12 |
| 3206    | 3236    | 0.479857 | 8.00E-14 | 7.16E-12 |
| 12956   | 13015   | 0.482967 | 9.57E-14 | 8.51E-12 |
| 1592    | 2109    | 0.522724 | 1.09E-13 | 9.65E-12 |
| 4752    | 4682    | 2.118316 | 1.13E-13 | 9.93E-12 |
| 2763    | 2729    | 2.066083 | 1.36E-13 | 1.18E-11 |
| 345     | 151     | 3.619082 | 1.37E-13 | 1.18E-11 |
| 11440   | 9225    | 2.043137 | 1.38E-13 | 1.19E-11 |
| 429     | 603     | 0.418871 | 1.46E-13 | 1.25E-11 |
| 5173    | 4879    | 0.477175 | 1.51E-13 | 1.29E-11 |
| 1021    | 1443    | 0.453732 | 1.69E-13 | 1.43E-11 |
| 992     | 643     | 2.449492 | 1.97E-13 | 1.65E-11 |
| 212729  | 275629  | 0.479161 | 2.57E-13 | 2.15E-11 |
| 1183    | 1313    | 0.474776 | 2.67E-13 | 2.22E-11 |
| 5112    | 6509    | 0.551407 | 2.86E-13 | 2.35E-11 |
| 572     | 613     | 2.790116 | 2.86E-13 | 2.35E-11 |
| 24774   | 33224   | 2.062571 | 3.26E-13 | 2.65E-11 |
| 1962    | 2055    | 0.509731 | 3.25E-13 | 2.65E-11 |
| 549     | 553     | 0.429463 | 3.29E-13 | 2.66E-11 |
| 1566    | 1914    | 0.508624 | 3.73E-13 | 3.00E-11 |
| 1160    | 1435    | 0.506718 | 4.06E-13 | 3.24E-11 |
| 5522    | 6504    | 0.53106  | 4.39E-13 | 3.48E-11 |
| 2635    | 2487    | 0.502602 | 5.64E-13 | 4.45E-11 |
| 4622    | 3076    | 2.024477 | 6.48E-13 | 5.09E-11 |
| 195     | 201     | 0.340671 | 6.72E-13 | 5.24E-11 |
| 384     | 597     | 0.419804 | 7.11E-13 | 5.52E-11 |
| 53311   | 29571   | 1.8396   | 7.63E-13 | 5.89E-11 |
| 1392337 | 1523039 | 0.526433 | 8.04E-13 | 6.13E-11 |
| 19229   | 15437   | 1.904014 | 8.01E-13 | 6.13E-11 |
| 10097   | 9485    | 0.507903 | 1.02E-12 | 7.73E-11 |
| 81475   | 108167  | 0.503187 | 1.29E-12 | 9.72E-11 |
| 62400   | 34359   | 1.819262 | 1.36E-12 | 1.02E-10 |
| 558     | 676     | 0.455467 | 1.41E-12 | 1.05E-10 |
| 3170    | 2896    | 0.497418 | 1.45E-12 | 1.08E-10 |
| 2336    | 2283    | 0.505445 | 1.53E-12 | 1.13E-10 |
| 87666   | 92024   | 0.505036 | 1.73E-12 | 1.27E-10 |
| 2622    | 1878    | 0.495632 | 1.82E-12 | 1.33E-10 |
| 5645    | 5550    | 0.521104 | 2.55E-12 | 1.85E-10 |
| 1568    | 1488    | 0.484868 | 3.04E-12 | 2.19E-10 |
| 248     | 300     | 0.404055 | 3.03E-12 | 2.19E-10 |
| 3097    | 3122    | 0.49339  | 3.17E-12 | 2.27E-10 |
| 4068    | 3692    | 0.532018 | 3.38E-12 | 2.41E-10 |
| 2649    | 3582    | 0.526859 | 4.07E-12 | 2.89E-10 |
| 4624    | 4319    | 0.53037  | 4.42E-12 | 3.12E-10 |
| 105300  | 83860   | 0.482635 | 4.45E-12 | 3.13E-10 |
| 4151    | 3604    | 0.518447 | 4.65E-12 | 3.25E-10 |
| 18      | 6       | 0.228819 | 5.23E-12 | 3.64E-10 |
| 5300    | 5957    | 0.547623 | 6.07E-12 | 4.20E-10 |

|       |       |          |          |          |
|-------|-------|----------|----------|----------|
| 985   | 881   | 0.463972 | 6.32E-12 | 4.35E-10 |
| 14201 | 14958 | 0.520554 | 6.69E-12 | 4.58E-10 |
| 1467  | 1500  | 0.525818 | 7.08E-12 | 4.83E-10 |
| 1216  | 1209  | 0.479446 | 7.13E-12 | 4.84E-10 |
| 380   | 315   | 0.467413 | 8.48E-12 | 5.73E-10 |
| 451   | 475   | 0.436247 | 9.47E-12 | 6.36E-10 |
| 1034  | 1194  | 0.504562 | 1.18E-11 | 7.91E-10 |
| 4304  | 5177  | 0.514474 | 1.33E-11 | 8.86E-10 |
| 2595  | 2948  | 0.539262 | 1.34E-11 | 8.88E-10 |
| 3367  | 3463  | 0.526553 | 1.43E-11 | 9.46E-10 |
| 1004  | 1228  | 0.517156 | 1.50E-11 | 9.84E-10 |
| 4718  | 4513  | 0.53996  | 1.52E-11 | 9.84E-10 |
| 1628  | 2018  | 0.507161 | 1.51E-11 | 9.84E-10 |
| 1015  | 1075  | 0.536383 | 1.52E-11 | 9.84E-10 |
| 4663  | 5485  | 0.54573  | 1.79E-11 | 1.15E-09 |
| 640   | 738   | 2.771146 | 1.90E-11 | 1.22E-09 |
| 9890  | 13661 | 0.530054 | 1.95E-11 | 1.24E-09 |
| 1077  | 952   | 0.485486 | 2.12E-11 | 1.35E-09 |
| 1005  | 1209  | 0.484622 | 2.35E-11 | 1.49E-09 |
| 568   | 626   | 3.135889 | 2.56E-11 | 1.61E-09 |
| 11625 | 10661 | 0.518995 | 2.83E-11 | 1.77E-09 |
| 25346 | 31732 | 0.54009  | 2.87E-11 | 1.79E-09 |
| 8279  | 9356  | 1.859655 | 3.07E-11 | 1.91E-09 |
| 68966 | 65818 | 1.908158 | 3.08E-11 | 1.91E-09 |
| 3278  | 2341  | 1.999778 | 4.04E-11 | 2.49E-09 |
| 4462  | 4254  | 0.538445 | 4.11E-11 | 2.52E-09 |
| 8465  | 9096  | 1.863735 | 4.26E-11 | 2.60E-09 |
| 3308  | 4721  | 0.578453 | 4.27E-11 | 2.60E-09 |
| 6837  | 7450  | 0.561738 | 4.47E-11 | 2.71E-09 |
| 3189  | 2357  | 0.543518 | 5.43E-11 | 3.28E-09 |
| 474   | 523   | 0.437776 | 5.75E-11 | 3.45E-09 |
| 4017  | 4166  | 0.526137 | 6.22E-11 | 3.72E-09 |
| 15    | 35    | 0.334287 | 6.91E-11 | 4.11E-09 |
| 3144  | 2703  | 0.553258 | 8.04E-11 | 4.77E-09 |
| 3418  | 3996  | 0.538074 | 8.17E-11 | 4.82E-09 |
| 4147  | 3371  | 0.568318 | 8.84E-11 | 5.20E-09 |
| 970   | 1247  | 0.520018 | 9.47E-11 | 5.54E-09 |
| 3270  | 3566  | 0.556239 | 1.03E-10 | 6.00E-09 |
| 138   | 145   | 0.36854  | 1.12E-10 | 6.51E-09 |
| 7893  | 8441  | 0.572982 | 1.14E-10 | 6.56E-09 |
| 96177 | 90574 | 0.5381   | 1.28E-10 | 7.39E-09 |
| 2602  | 2540  | 0.558647 | 1.31E-10 | 7.49E-09 |
| 5222  | 4219  | 1.848432 | 1.31E-10 | 7.49E-09 |
| 2907  | 2801  | 0.547975 | 1.51E-10 | 8.58E-09 |
| 21269 | 22404 | 0.527699 | 1.65E-10 | 9.35E-09 |
| 591   | 865   | 0.485458 | 1.78E-10 | 1.00E-08 |
| 6612  | 2375  | 1.774324 | 1.94E-10 | 1.09E-08 |
| 179   | 316   | 0.428508 | 1.98E-10 | 1.11E-08 |
| 1213  | 1287  | 0.50497  | 2.05E-10 | 1.14E-08 |
| 1198  | 1177  | 0.494205 | 2.38E-10 | 1.32E-08 |
| 2901  | 2280  | 2.010884 | 2.52E-10 | 1.39E-08 |



|        |        |          |          |          |
|--------|--------|----------|----------|----------|
| 2018   | 1719   | 0.546946 | 2.55E-10 | 1.40E-08 |
| 297    | 92     | 0.380095 | 2.70E-10 | 1.48E-08 |
| 7220   | 7528   | 0.569637 | 2.73E-10 | 1.49E-08 |
| 1586   | 1864   | 0.580136 | 2.81E-10 | 1.53E-08 |
| 621    | 758    | 0.523151 | 3.12E-10 | 1.69E-08 |
| 2206   | 1580   | 2.136192 | 3.75E-10 | 2.02E-08 |
| 1655   | 1722   | 0.52142  | 3.92E-10 | 2.11E-08 |
| 26199  | 19237  | 1.754557 | 3.99E-10 | 2.14E-08 |
| 2423   | 2030   | 1.838214 | 4.07E-10 | 2.17E-08 |
| 1239   | 1352   | 0.519154 | 4.07E-10 | 2.17E-08 |
| 1774   | 2254   | 0.582775 | 4.17E-10 | 2.21E-08 |
| 9461   | 7848   | 1.796221 | 4.47E-10 | 2.36E-08 |
| 17366  | 16694  | 0.535761 | 4.53E-10 | 2.39E-08 |
| 784    | 679    | 0.480243 | 4.60E-10 | 2.41E-08 |
| 57     | 86     | 0.359677 | 4.79E-10 | 2.50E-08 |
| 114    | 85     | 0.329154 | 5.40E-10 | 2.81E-08 |
| 304    | 237    | 0.396453 | 5.72E-10 | 2.97E-08 |
| 10989  | 14443  | 0.555679 | 5.76E-10 | 2.97E-08 |
| 1581   | 1926   | 0.558575 | 5.96E-10 | 3.06E-08 |
| 111    | 180    | 0.35975  | 6.21E-10 | 3.18E-08 |
| 1317   | 1142   | 0.564926 | 6.40E-10 | 3.27E-08 |
| 16146  | 17006  | 1.73838  | 7.36E-10 | 3.75E-08 |
| 880    | 986    | 0.516834 | 7.43E-10 | 3.77E-08 |
| 1333   | 1216   | 2.190063 | 7.47E-10 | 3.78E-08 |
| 725    | 620    | 0.505775 | 7.59E-10 | 3.82E-08 |
| 6379   | 7817   | 0.572608 | 7.77E-10 | 3.90E-08 |
| 972    | 897    | 0.477292 | 8.18E-10 | 4.09E-08 |
| 981    | 740    | 2.351861 | 8.29E-10 | 4.13E-08 |
| 190    | 241    | 0.421372 | 9.12E-10 | 4.53E-08 |
| 3287   | 3448   | 0.557295 | 9.70E-10 | 4.80E-08 |
| 905    | 762    | 0.486835 | 9.92E-10 | 4.89E-08 |
| 565    | 549    | 0.486037 | 1.09E-09 | 5.34E-08 |
| 16615  | 16614  | 0.559092 | 1.09E-09 | 5.34E-08 |
| 3725   | 3515   | 0.571955 | 1.20E-09 | 5.83E-08 |
| 2228   | 1883   | 2.023486 | 1.21E-09 | 5.90E-08 |
| 134864 | 147591 | 0.553494 | 1.24E-09 | 6.00E-08 |
| 17602  | 16278  | 0.539891 | 1.28E-09 | 6.17E-08 |
| 29038  | 36474  | 0.5449   | 1.39E-09 | 6.66E-08 |
| 28489  | 21120  | 0.551795 | 1.52E-09 | 7.27E-08 |
| 2179   | 2075   | 1.815929 | 1.68E-09 | 8.01E-08 |
| 25659  | 27553  | 1.725271 | 1.72E-09 | 8.20E-08 |
| 17024  | 16541  | 1.776064 | 1.75E-09 | 8.30E-08 |
| 35934  | 43407  | 0.575725 | 1.88E-09 | 8.89E-08 |
| 365    | 460    | 0.498243 | 2.07E-09 | 9.74E-08 |
| 101    | 126    | 0.46902  | 2.26E-09 | 1.06E-07 |
| 748    | 817    | 0.49395  | 2.41E-09 | 1.13E-07 |
| 155    | 160    | 0.481073 | 2.43E-09 | 1.13E-07 |
| 307350 | 299080 | 0.567812 | 2.49E-09 | 1.16E-07 |
| 1078   | 852    | 2.215156 | 2.64E-09 | 1.22E-07 |
| 9536   | 10426  | 0.573322 | 2.67E-09 | 1.23E-07 |
| 2684   | 2295   | 0.640151 | 2.88E-09 | 1.33E-07 |

|        |        |          |          |          |
|--------|--------|----------|----------|----------|
| 100    | 66     | 0.171491 | 3.41E-09 | 1.57E-07 |
| 45675  | 48588  | 0.555898 | 3.52E-09 | 1.61E-07 |
| 67478  | 54529  | 1.738194 | 3.60E-09 | 1.64E-07 |
| 3427   | 3196   | 0.571122 | 3.76E-09 | 1.71E-07 |
| 1200   | 992    | 0.594438 | 3.93E-09 | 1.78E-07 |
| 109    | 101    | 0.357834 | 4.01E-09 | 1.81E-07 |
| 2701   | 3805   | 0.635951 | 4.03E-09 | 1.81E-07 |
| 2325   | 2138   | 0.561821 | 4.14E-09 | 1.86E-07 |
| 2590   | 2454   | 0.566315 | 4.24E-09 | 1.90E-07 |
| 1124   | 835    | 0.514594 | 4.35E-09 | 1.94E-07 |
| 2668   | 2447   | 0.580778 | 4.50E-09 | 2.00E-07 |
| 1175   | 1445   | 1.977472 | 4.51E-09 | 2.00E-07 |
| 19334  | 18272  | 0.563753 | 4.54E-09 | 2.01E-07 |
| 1490   | 1265   | 2.12827  | 4.80E-09 | 2.11E-07 |
| 8062   | 8258   | 1.75489  | 4.97E-09 | 2.18E-07 |
| 4859   | 4581   | 0.581177 | 5.44E-09 | 2.38E-07 |
| 570    | 978    | 0.489824 | 5.67E-09 | 2.47E-07 |
| 1272   | 1513   | 0.575713 | 6.20E-09 | 2.70E-07 |
| 4029   | 4521   | 0.559301 | 6.44E-09 | 2.79E-07 |
| 6      | 4      | 0.126959 | 6.72E-09 | 2.89E-07 |
| 1369   | 1467   | 0.559367 | 6.70E-09 | 2.89E-07 |
| 490    | 498    | 0.5257   | 6.96E-09 | 2.99E-07 |
| 5916   | 5676   | 0.576855 | 7.00E-09 | 3.00E-07 |
| 288933 | 360085 | 0.603266 | 7.11E-09 | 3.03E-07 |
| 2232   | 2568   | 1.876598 | 7.53E-09 | 3.21E-07 |
| 3136   | 2133   | 1.809299 | 7.65E-09 | 3.24E-07 |
| 1126   | 1231   | 0.598923 | 7.64E-09 | 3.24E-07 |
| 9290   | 11764  | 0.60256  | 7.74E-09 | 3.26E-07 |
| 906    | 885    | 0.518724 | 8.37E-09 | 3.52E-07 |
| 63258  | 55092  | 0.563374 | 8.51E-09 | 3.57E-07 |
| 4025   | 2870   | 0.598413 | 8.85E-09 | 3.70E-07 |
| 416    | 400    | 2.578321 | 9.76E-09 | 4.07E-07 |
| 2593   | 2296   | 0.539295 | 1.03E-08 | 4.28E-07 |
| 1217   | 1484   | 0.508587 | 1.12E-08 | 4.64E-07 |
| 2249   | 1877   | 0.564575 | 1.19E-08 | 4.93E-07 |
| 2255   | 2314   | 0.571308 | 1.21E-08 | 4.98E-07 |
| 7557   | 6506   | 0.592182 | 1.22E-08 | 5.00E-07 |
| 17516  | 14118  | 0.560175 | 1.31E-08 | 5.35E-07 |
| 8584   | 10536  | 0.60834  | 1.32E-08 | 5.37E-07 |
| 21273  | 18910  | 1.717582 | 1.34E-08 | 5.46E-07 |
| 229    | 188    | 0.391591 | 1.41E-08 | 5.71E-07 |
| 173    | 88     | 0.544163 | 1.41E-08 | 5.71E-07 |
| 23725  | 24990  | 1.730902 | 1.46E-08 | 5.90E-07 |
| 26928  | 20285  | 1.683988 | 1.57E-08 | 6.31E-07 |
| 3219   | 3134   | 0.586413 | 1.64E-08 | 6.59E-07 |
| 214    | 293    | 0.472287 | 1.77E-08 | 7.07E-07 |
| 98     | 106    | 0.364093 | 1.82E-08 | 7.27E-07 |
| 2100   | 2041   | 0.598667 | 1.84E-08 | 7.34E-07 |
| 58123  | 59327  | 0.580034 | 1.87E-08 | 7.41E-07 |
| 2472   | 2836   | 0.571157 | 1.88E-08 | 7.43E-07 |
| 2982   | 2465   | 1.791386 | 1.90E-08 | 7.50E-07 |

|       |       |          |          |          |
|-------|-------|----------|----------|----------|
| 3865  | 3366  | 0.575167 | 1.96E-08 | 7.73E-07 |
| 3312  | 2798  | 1.776594 | 2.01E-08 | 7.88E-07 |
| 5301  | 5389  | 0.606355 | 2.24E-08 | 8.75E-07 |
| 4993  | 5560  | 0.616401 | 2.25E-08 | 8.80E-07 |
| 7432  | 6644  | 0.596906 | 2.27E-08 | 8.83E-07 |
| 627   | 626   | 0.499625 | 2.34E-08 | 9.06E-07 |
| 762   | 866   | 0.559813 | 2.35E-08 | 9.09E-07 |
| 5600  | 5221  | 0.589818 | 2.66E-08 | 1.03E-06 |
| 923   | 783   | 0.545063 | 2.77E-08 | 1.06E-06 |
| 916   | 985   | 0.541048 | 3.00E-08 | 1.15E-06 |
| 7622  | 7240  | 0.627043 | 3.10E-08 | 1.19E-06 |
| 2805  | 2911  | 0.607188 | 3.22E-08 | 1.23E-06 |
| 2296  | 2121  | 0.577274 | 3.34E-08 | 1.27E-06 |
| 859   | 949   | 0.545579 | 3.34E-08 | 1.27E-06 |
| 5451  | 3953  | 1.699076 | 3.48E-08 | 1.31E-06 |
| 6826  | 6438  | 1.696463 | 3.48E-08 | 1.31E-06 |
| 31869 | 31897 | 1.654917 | 3.61E-08 | 1.36E-06 |
| 36212 | 29237 | 0.589302 | 3.91E-08 | 1.47E-06 |
| 8019  | 5997  | 1.673556 | 4.12E-08 | 1.54E-06 |
| 198   | 20    | 3.691076 | 4.50E-08 | 1.68E-06 |
| 658   | 787   | 0.574532 | 4.92E-08 | 1.83E-06 |
| 40146 | 35146 | 1.716952 | 5.11E-08 | 1.90E-06 |
| 9371  | 8226  | 0.613366 | 5.83E-08 | 2.16E-06 |
| 135   | 123   | 0.409921 | 5.98E-08 | 2.21E-06 |
| 1393  | 1286  | 0.552592 | 6.06E-08 | 2.23E-06 |
| 9213  | 7154  | 1.640578 | 6.17E-08 | 2.27E-06 |
| 14077 | 12981 | 0.583971 | 6.47E-08 | 2.37E-06 |
| 1948  | 1835  | 0.600276 | 7.61E-08 | 2.78E-06 |
| 1123  | 686   | 0.535014 | 7.67E-08 | 2.80E-06 |
| 17    | 46    | 8.124916 | 8.08E-08 | 2.94E-06 |
| 19185 | 12412 | 1.579898 | 8.13E-08 | 2.95E-06 |
| 3297  | 2944  | 1.77393  | 8.44E-08 | 3.06E-06 |
| 233   | 297   | 0.454683 | 8.57E-08 | 3.09E-06 |
| 73    | 153   | 0.455726 | 8.64E-08 | 3.10E-06 |
| 131   | 131   | 0.407645 | 8.64E-08 | 3.10E-06 |
| 7846  | 7295  | 0.59997  | 8.70E-08 | 3.11E-06 |
| 3734  | 3227  | 1.686872 | 8.69E-08 | 3.11E-06 |
| 328   | 425   | 0.541167 | 8.83E-08 | 3.15E-06 |
| 1746  | 1317  | 0.59519  | 8.97E-08 | 3.19E-06 |
| 199   | 302   | 0.459882 | 9.08E-08 | 3.22E-06 |
| 4570  | 4414  | 0.614337 | 1.02E-07 | 3.62E-06 |
| 1172  | 1037  | 0.531883 | 1.03E-07 | 3.64E-06 |
| 181   | 253   | 0.455931 | 1.09E-07 | 3.82E-06 |
| 29036 | 26711 | 1.632573 | 1.09E-07 | 3.84E-06 |
| 75    | 74    | 5.211167 | 1.15E-07 | 4.01E-06 |
| 16961 | 22691 | 1.658762 | 1.16E-07 | 4.06E-06 |
| 610   | 1050  | 0.555211 | 1.17E-07 | 4.07E-06 |
| 3392  | 3892  | 0.617005 | 1.19E-07 | 4.14E-06 |
| 36741 | 37628 | 1.650095 | 1.21E-07 | 4.18E-06 |
| 13317 | 14762 | 0.603823 | 1.24E-07 | 4.28E-06 |
| 29960 | 29382 | 0.583222 | 1.31E-07 | 4.52E-06 |

|        |        |          |          |          |
|--------|--------|----------|----------|----------|
| 4425   | 4542   | 1.675378 | 1.31E-07 | 4.52E-06 |
| 13495  | 10671  | 1.629834 | 1.38E-07 | 4.72E-06 |
| 10428  | 8593   | 1.546285 | 1.38E-07 | 4.72E-06 |
| 21233  | 18791  | 1.688795 | 1.43E-07 | 4.89E-06 |
| 14606  | 13118  | 1.625395 | 1.58E-07 | 5.38E-06 |
| 6994   | 7373   | 1.674424 | 1.60E-07 | 5.44E-06 |
| 727    | 564    | 0.502319 | 1.62E-07 | 5.51E-06 |
| 1683   | 1717   | 0.59979  | 1.67E-07 | 5.65E-06 |
| 528    | 56     | 3.261279 | 1.69E-07 | 5.70E-06 |
| 5334   | 4863   | 0.618719 | 1.83E-07 | 6.17E-06 |
| 242    | 300    | 0.519043 | 1.85E-07 | 6.22E-06 |
| 455    | 621    | 0.498957 | 1.90E-07 | 6.37E-06 |
| 55904  | 56569  | 1.631859 | 1.96E-07 | 6.54E-06 |
| 281    | 304    | 0.485217 | 1.96E-07 | 6.54E-06 |
| 34877  | 39455  | 1.727293 | 1.99E-07 | 6.62E-06 |
| 1189   | 1289   | 0.584305 | 2.03E-07 | 6.75E-06 |
| 2170   | 2259   | 0.60353  | 2.04E-07 | 6.77E-06 |
| 3645   | 3409   | 1.620981 | 2.16E-07 | 7.14E-06 |
| 12041  | 13932  | 0.613021 | 2.22E-07 | 7.33E-06 |
| 826946 | 790539 | 0.611442 | 2.25E-07 | 7.40E-06 |
| 58     | 158    | 0.505243 | 2.33E-07 | 7.64E-06 |
| 3146   | 2629   | 1.758641 | 2.46E-07 | 8.05E-06 |
| 225    | 116    | 3.287888 | 2.55E-07 | 8.32E-06 |
| 24977  | 20238  | 0.574551 | 2.59E-07 | 8.44E-06 |
| 331    | 296    | 0.525165 | 2.59E-07 | 8.44E-06 |
| 1761   | 1710   | 0.59677  | 3.12E-07 | 1.01E-05 |
| 3998   | 3585   | 0.596714 | 3.13E-07 | 1.01E-05 |
| 3489   | 3393   | 0.619445 | 3.14E-07 | 1.01E-05 |
| 22703  | 20932  | 1.629904 | 3.18E-07 | 1.02E-05 |
| 19706  | 18117  | 0.61365  | 3.19E-07 | 1.02E-05 |
| 4083   | 4229   | 0.621196 | 3.21E-07 | 1.03E-05 |
| 4488   | 4885   | 0.623189 | 3.23E-07 | 1.03E-05 |
| 9355   | 9650   | 1.581621 | 3.30E-07 | 1.05E-05 |
| 4      | 7      | 0.171527 | 3.39E-07 | 1.08E-05 |
| 142889 | 189007 | 0.598039 | 3.45E-07 | 1.10E-05 |
| 3873   | 4676   | 0.647262 | 3.51E-07 | 1.11E-05 |
| 2311   | 2319   | 0.590724 | 3.53E-07 | 1.12E-05 |
| 523    | 820    | 0.612721 | 4.05E-07 | 1.28E-05 |
| 2471   | 2393   | 0.568491 | 4.11E-07 | 1.29E-05 |
| 491    | 452    | 0.528881 | 4.39E-07 | 1.38E-05 |
| 4212   | 3399   | 0.61025  | 4.57E-07 | 1.43E-05 |
| 36384  | 30161  | 0.597839 | 4.80E-07 | 1.50E-05 |
| 10829  | 11734  | 0.63809  | 4.84E-07 | 1.51E-05 |
| 3815   | 4096   | 0.648098 | 4.88E-07 | 1.52E-05 |
| 1643   | 1704   | 0.61045  | 4.91E-07 | 1.53E-05 |
| 1526   | 1658   | 0.59883  | 4.92E-07 | 1.53E-05 |
| 16856  | 14202  | 1.587413 | 4.94E-07 | 1.53E-05 |
| 217    | 299    | 0.481447 | 4.98E-07 | 1.54E-05 |
| 245    | 175    | 2.954632 | 5.06E-07 | 1.56E-05 |
| 4679   | 4094   | 1.642394 | 5.15E-07 | 1.58E-05 |
| 994    | 880    | 1.968103 | 5.18E-07 | 1.59E-05 |

|        |        |          |          |          |
|--------|--------|----------|----------|----------|
| 1969   | 2118   | 0.610095 | 5.20E-07 | 1.59E-05 |
| 9936   | 10057  | 0.633615 | 5.23E-07 | 1.60E-05 |
| 646    | 722    | 0.534848 | 5.29E-07 | 1.61E-05 |
| 8843   | 8882   | 0.630054 | 5.36E-07 | 1.63E-05 |
| 6117   | 5826   | 0.641999 | 5.41E-07 | 1.64E-05 |
| 515411 | 469013 | 0.611594 | 5.61E-07 | 1.70E-05 |
| 109757 | 112602 | 0.606529 | 6.11E-07 | 1.85E-05 |
| 936    | 1026   | 0.659902 | 6.26E-07 | 1.89E-05 |
| 608    | 718    | 0.538771 | 6.37E-07 | 1.92E-05 |
| 364148 | 320366 | 1.613114 | 6.44E-07 | 1.93E-05 |
| 25     | 56     | 14.11515 | 6.65E-07 | 1.99E-05 |
| 3682   | 4586   | 0.65423  | 6.71E-07 | 2.00E-05 |
| 3665   | 3431   | 1.58423  | 6.71E-07 | 2.00E-05 |
| 13807  | 12497  | 1.61094  | 6.80E-07 | 2.02E-05 |
| 1703   | 1490   | 0.603421 | 6.86E-07 | 2.04E-05 |
| 12854  | 13749  | 1.531563 | 6.99E-07 | 2.07E-05 |
| 729    | 683    | 0.556431 | 6.98E-07 | 2.07E-05 |
| 93244  | 88323  | 0.618963 | 7.21E-07 | 2.13E-05 |
| 7506   | 6395   | 1.589255 | 7.34E-07 | 2.16E-05 |
| 534    | 641    | 0.555138 | 7.57E-07 | 2.22E-05 |
| 538    | 624    | 0.556088 | 7.73E-07 | 2.27E-05 |
| 5028   | 4915   | 0.633138 | 7.81E-07 | 2.29E-05 |
| 4756   | 5043   | 0.660416 | 7.84E-07 | 2.29E-05 |
| 9012   | 9143   | 1.564666 | 7.90E-07 | 2.30E-05 |
| 423    | 398    | 0.528087 | 7.89E-07 | 2.30E-05 |
| 542    | 548    | 0.524143 | 7.94E-07 | 2.30E-05 |
| 2794   | 2433   | 1.666771 | 8.18E-07 | 2.37E-05 |
| 16756  | 17314  | 0.60194  | 8.37E-07 | 2.42E-05 |
| 9603   | 7003   | 1.518909 | 8.65E-07 | 2.49E-05 |
| 711    | 545    | 1.907073 | 8.77E-07 | 2.52E-05 |
| 8106   | 8033   | 0.645297 | 9.38E-07 | 2.69E-05 |
| 24096  | 23519  | 0.62705  | 9.44E-07 | 2.71E-05 |
| 521    | 777    | 0.592687 | 1.04E-06 | 2.98E-05 |
| 11094  | 10863  | 0.648634 | 1.05E-06 | 3.01E-05 |
| 3877   | 2860   | 1.630854 | 1.07E-06 | 3.04E-05 |
| 63262  | 54790  | 1.58593  | 1.08E-06 | 3.08E-05 |
| 673    | 521    | 2.095154 | 1.08E-06 | 3.08E-05 |
| 10786  | 9130   | 1.562806 | 1.11E-06 | 3.13E-05 |
| 8834   | 9575   | 0.641006 | 1.13E-06 | 3.18E-05 |
| 10028  | 8783   | 1.56733  | 1.16E-06 | 3.26E-05 |
| 729    | 721    | 2.113981 | 1.20E-06 | 3.38E-05 |
| 8999   | 9202   | 1.602228 | 1.22E-06 | 3.43E-05 |
| 491    | 398    | 0.585434 | 1.23E-06 | 3.44E-05 |
| 7873   | 6244   | 1.516863 | 1.23E-06 | 3.45E-05 |
| 1158   | 1213   | 0.616849 | 1.26E-06 | 3.52E-05 |
| 2061   | 3115   | 0.656542 | 1.26E-06 | 3.52E-05 |
| 3153   | 3614   | 0.630288 | 1.28E-06 | 3.55E-05 |
| 3184   | 2466   | 0.611067 | 1.28E-06 | 3.56E-05 |
| 1490   | 1359   | 0.598056 | 1.33E-06 | 3.68E-05 |
| 120    | 532    | 2.304135 | 1.33E-06 | 3.69E-05 |
| 21666  | 19251  | 1.520744 | 1.34E-06 | 3.69E-05 |

|        |        |          |          |          |
|--------|--------|----------|----------|----------|
| 30232  | 31076  | 1.554803 | 1.37E-06 | 3.77E-05 |
| 1285   | 1271   | 0.610256 | 1.38E-06 | 3.80E-05 |
| 819    | 743    | 0.552159 | 1.51E-06 | 4.15E-05 |
| 1903   | 2001   | 0.624058 | 1.52E-06 | 4.16E-05 |
| 3471   | 3171   | 0.655133 | 1.52E-06 | 4.17E-05 |
| 8568   | 7714   | 1.535538 | 1.53E-06 | 4.17E-05 |
| 22999  | 18262  | 1.499849 | 1.56E-06 | 4.25E-05 |
| 10728  | 10020  | 1.570953 | 1.57E-06 | 4.26E-05 |
| 5011   | 4293   | 1.548887 | 1.58E-06 | 4.29E-05 |
| 1715   | 1617   | 1.748736 | 1.62E-06 | 4.37E-05 |
| 24220  | 21852  | 0.609289 | 1.66E-06 | 4.47E-05 |
| 12338  | 12645  | 0.642786 | 1.70E-06 | 4.57E-05 |
| 31760  | 32983  | 0.617917 | 1.74E-06 | 4.68E-05 |
| 575786 | 501970 | 0.627586 | 1.75E-06 | 4.69E-05 |
| 85030  | 71962  | 0.609864 | 1.79E-06 | 4.81E-05 |
| 273    | 226    | 0.513634 | 1.88E-06 | 5.02E-05 |
| 4202   | 4737   | 1.578589 | 1.90E-06 | 5.07E-05 |
| 56107  | 54455  | 0.619637 | 1.92E-06 | 5.12E-05 |
| 5301   | 6442   | 0.667686 | 1.94E-06 | 5.16E-05 |
| 1373   | 1258   | 0.671386 | 1.97E-06 | 5.22E-05 |
| 5544   | 5822   | 0.663582 | 1.97E-06 | 5.23E-05 |
| 10225  | 10090  | 1.578584 | 1.98E-06 | 5.25E-05 |
| 17440  | 18351  | 0.628194 | 2.03E-06 | 5.35E-05 |
| 2914   | 3120   | 0.63113  | 2.16E-06 | 5.68E-05 |
| 176    | 168    | 0.467271 | 2.19E-06 | 5.75E-05 |
| 29     | 50     | 0.416548 | 2.25E-06 | 5.91E-05 |
| 7365   | 7601   | 1.548097 | 2.37E-06 | 6.21E-05 |
| 35562  | 27437  | 0.62149  | 2.40E-06 | 6.28E-05 |
| 502    | 526    | 2.255337 | 2.49E-06 | 6.49E-05 |
| 3194   | 3194   | 0.642882 | 2.52E-06 | 6.56E-05 |
| 3103   | 3144   | 0.635212 | 2.60E-06 | 6.75E-05 |
| 11520  | 9778   | 1.497045 | 2.61E-06 | 6.78E-05 |
| 44409  | 42253  | 1.565753 | 2.76E-06 | 7.16E-05 |
| 9203   | 8213   | 0.645137 | 2.82E-06 | 7.29E-05 |
| 17985  | 14503  | 1.512405 | 2.85E-06 | 7.36E-05 |
| 5995   | 5614   | 1.557608 | 2.88E-06 | 7.41E-05 |
| 871    | 928    | 0.622467 | 2.91E-06 | 7.49E-05 |
| 5834   | 5292   | 0.644944 | 2.93E-06 | 7.52E-05 |
| 11405  | 11330  | 0.656756 | 2.98E-06 | 7.64E-05 |
| 223    | 212    | 2.531637 | 3.09E-06 | 7.90E-05 |
| 4116   | 4418   | 0.682424 | 3.17E-06 | 8.11E-05 |
| 4095   | 3682   | 0.623027 | 3.24E-06 | 8.27E-05 |
| 122    | 158    | 3.255359 | 3.30E-06 | 8.39E-05 |
| 2190   | 2401   | 0.636267 | 3.32E-06 | 8.43E-05 |
| 6700   | 6471   | 1.472031 | 3.43E-06 | 8.70E-05 |
| 7821   | 6661   | 0.64626  | 3.44E-06 | 8.71E-05 |
| 1137   | 1045   | 0.593567 | 3.49E-06 | 8.80E-05 |
| 3650   | 3394   | 1.636468 | 3.49E-06 | 8.80E-05 |
| 886    | 989    | 0.592259 | 3.50E-06 | 8.80E-05 |
| 3834   | 3378   | 0.642537 | 3.58E-06 | 9.00E-05 |
| 4262   | 4085   | 1.528981 | 3.71E-06 | 9.30E-05 |

|        |        |          |          |          |
|--------|--------|----------|----------|----------|
| 93     | 111    | 0.429572 | 3.79E-06 | 9.50E-05 |
| 14203  | 13723  | 0.644349 | 3.85E-06 | 9.61E-05 |
| 67     | 37     | 0.39799  | 3.87E-06 | 9.65E-05 |
| 3663   | 3165   | 0.648521 | 3.91E-06 | 9.73E-05 |
| 49957  | 49861  | 1.59696  | 3.91E-06 | 9.73E-05 |
| 6291   | 5215   | 1.532792 | 4.00E-06 | 9.92E-05 |
| 842    | 640    | 0.573722 | 4.08E-06 | 0.000101 |
| 77     | 80     | 0.375388 | 4.10E-06 | 0.000101 |
| 702    | 976    | 0.615185 | 4.11E-06 | 0.000101 |
| 21653  | 19191  | 1.467439 | 4.11E-06 | 0.000101 |
| 20216  | 17716  | 1.568651 | 4.13E-06 | 0.000102 |
| 23387  | 21125  | 0.641017 | 4.17E-06 | 0.000102 |
| 22     | 58     | 0.380524 | 4.18E-06 | 0.000102 |
| 1513   | 1681   | 0.617878 | 4.24E-06 | 0.000104 |
| 1803   | 2047   | 0.619263 | 4.33E-06 | 0.000106 |
| 8603   | 8224   | 0.648501 | 4.46E-06 | 0.000109 |
| 29377  | 24232  | 0.636573 | 4.46E-06 | 0.000109 |
| 236    | 213    | 0.529712 | 4.52E-06 | 0.00011  |
| 144943 | 146964 | 0.646029 | 4.55E-06 | 0.00011  |
| 301    | 285    | 0.55986  | 4.58E-06 | 0.000111 |
| 21215  | 16232  | 1.549092 | 4.64E-06 | 0.000112 |
| 82     | 89     | 0.446467 | 4.76E-06 | 0.000115 |
| 72     | 34     | 0.362734 | 4.88E-06 | 0.000118 |
| 831    | 814    | 2.059654 | 4.89E-06 | 0.000118 |
| 2763   | 3508   | 0.666494 | 4.98E-06 | 0.00012  |
| 1443   | 1557   | 0.639708 | 5.08E-06 | 0.000122 |
| 270    | 217    | 2.573918 | 5.17E-06 | 0.000124 |
| 36663  | 37428  | 0.612756 | 5.28E-06 | 0.000126 |
| 245244 | 198121 | 0.618849 | 5.30E-06 | 0.000126 |
| 10141  | 10034  | 0.670166 | 5.41E-06 | 0.000129 |
| 152    | 78     | 3.183435 | 5.41E-06 | 0.000129 |
| 6005   | 5491   | 0.665358 | 5.51E-06 | 0.000131 |
| 15867  | 16059  | 0.642911 | 5.57E-06 | 0.000132 |
| 21     | 21     | 25.43325 | 5.70E-06 | 0.000135 |
| 1996   | 1357   | 1.565582 | 5.92E-06 | 0.00014  |
| 12650  | 12410  | 1.464032 | 6.01E-06 | 0.000142 |
| 12696  | 12028  | 0.649368 | 6.09E-06 | 0.000143 |
| 4764   | 4687   | 1.546704 | 6.21E-06 | 0.000146 |
| 3522   | 2982   | 0.659139 | 6.24E-06 | 0.000146 |
| 1230   | 1311   | 0.612003 | 6.36E-06 | 0.000149 |
| 2020   | 2020   | 0.635549 | 6.44E-06 | 0.000151 |
| 18543  | 14705  | 1.463117 | 6.51E-06 | 0.000152 |
| 3408   | 2874   | 0.67237  | 6.56E-06 | 0.000153 |
| 2848   | 2813   | 1.582579 | 6.61E-06 | 0.000154 |
| 11019  | 9446   | 1.482452 | 6.73E-06 | 0.000156 |
| 2416   | 3406   | 0.670712 | 6.99E-06 | 0.000162 |
| 1413   | 1271   | 0.631344 | 7.03E-06 | 0.000163 |
| 6115   | 7306   | 0.687539 | 7.58E-06 | 0.000175 |
| 25342  | 21993  | 0.650333 | 7.65E-06 | 0.000176 |
| 444    | 436    | 0.575514 | 7.67E-06 | 0.000177 |
| 79948  | 75814  | 0.634223 | 7.71E-06 | 0.000177 |

|        |        |          |          |          |
|--------|--------|----------|----------|----------|
| 10869  | 9367   | 0.666024 | 7.80E-06 | 0.000179 |
| 4131   | 3546   | 1.58483  | 7.79E-06 | 0.000179 |
| 2249   | 2857   | 1.622479 | 8.03E-06 | 0.000184 |
| 7704   | 6257   | 1.470411 | 8.13E-06 | 0.000186 |
| 236    | 181    | 0.522281 | 8.53E-06 | 0.000195 |
| 3733   | 4467   | 0.69404  | 8.62E-06 | 0.000196 |
| 666    | 705    | 0.605549 | 8.83E-06 | 0.000201 |
| 5138   | 4619   | 1.579247 | 8.95E-06 | 0.000203 |
| 1644   | 1482   | 0.643909 | 9.02E-06 | 0.000204 |
| 690    | 812    | 0.637365 | 9.12E-06 | 0.000206 |
| 746798 | 606163 | 0.663489 | 9.15E-06 | 0.000207 |
| 2902   | 2308   | 0.680703 | 9.35E-06 | 0.000211 |
| 11571  | 9293   | 0.639939 | 9.54E-06 | 0.000215 |
| 4357   | 4588   | 0.676719 | 9.66E-06 | 0.000217 |
| 4355   | 5109   | 0.680534 | 9.66E-06 | 0.000217 |
| 9660   | 9697   | 0.651951 | 9.87E-06 | 0.000221 |
| 592    | 578    | 0.636481 | 1.03E-05 | 0.00023  |
| 1008   | 1561   | 0.62515  | 1.05E-05 | 0.000233 |
| 4162   | 3713   | 1.569402 | 1.05E-05 | 0.000233 |
| 2512   | 2779   | 1.600104 | 1.05E-05 | 0.000234 |
| 21323  | 18344  | 0.658438 | 1.05E-05 | 0.000234 |
| 16147  | 14094  | 1.510853 | 1.07E-05 | 0.000237 |
| 333    | 282    | 0.522658 | 1.07E-05 | 0.000238 |
| 1724   | 2029   | 0.62266  | 1.14E-05 | 0.000252 |
| 567    | 862    | 1.906287 | 1.14E-05 | 0.000252 |
| 2619   | 2467   | 0.639713 | 1.15E-05 | 0.000254 |
| 3476   | 3278   | 0.607262 | 1.19E-05 | 0.000262 |
| 314    | 399    | 0.561493 | 1.20E-05 | 0.000264 |
| 867    | 868    | 0.581513 | 1.20E-05 | 0.000264 |
| 690    | 674    | 0.573684 | 1.21E-05 | 0.000265 |
| 24756  | 25356  | 0.661819 | 1.22E-05 | 0.000267 |
| 4047   | 4225   | 1.543667 | 1.24E-05 | 0.000271 |
| 2397   | 1674   | 0.653178 | 1.27E-05 | 0.000278 |
| 18885  | 17922  | 1.513822 | 1.30E-05 | 0.000282 |
| 32     | 16     | 0.20998  | 1.29E-05 | 0.000282 |
| 6834   | 6527   | 1.502366 | 1.32E-05 | 0.000287 |
| 10402  | 9256   | 1.496727 | 1.35E-05 | 0.000293 |
| 1404   | 1310   | 0.642353 | 1.36E-05 | 0.000293 |
| 2222   | 2818   | 0.647134 | 1.38E-05 | 0.000298 |
| 2541   | 2813   | 0.670965 | 1.39E-05 | 0.000299 |
| 885    | 823    | 0.6088   | 1.40E-05 | 0.000302 |
| 2361   | 2554   | 0.643484 | 1.46E-05 | 0.000315 |
| 8618   | 8155   | 1.47064  | 1.54E-05 | 0.000332 |
| 34     | 102    | 0.476981 | 1.57E-05 | 0.000336 |
| 1481   | 1655   | 0.631782 | 1.58E-05 | 0.000339 |
| 37     | 5      | 0.29347  | 1.63E-05 | 0.000347 |
| 3857   | 4694   | 0.677206 | 1.63E-05 | 0.000347 |
| 17231  | 14383  | 1.478709 | 1.86E-05 | 0.000396 |
| 15908  | 15627  | 0.649572 | 1.87E-05 | 0.000398 |
| 8962   | 10529  | 1.506047 | 1.92E-05 | 0.000407 |
| 6432   | 6671   | 0.667034 | 1.93E-05 | 0.000408 |



|        |        |          |          |          |
|--------|--------|----------|----------|----------|
| 1315   | 1290   | 0.641172 | 1.93E-05 | 0.00041  |
| 288    | 320    | 0.57731  | 1.97E-05 | 0.000417 |
| 1440   | 146    | 1.795101 | 2.00E-05 | 0.000422 |
| 1333   | 2390   | 0.686367 | 2.01E-05 | 0.000425 |
| 2175   | 2913   | 0.708379 | 2.05E-05 | 0.000431 |
| 7546   | 8008   | 1.49438  | 2.14E-05 | 0.00045  |
| 221    | 145    | 2.678577 | 2.17E-05 | 0.000457 |
| 4773   | 4765   | 0.683573 | 2.24E-05 | 0.000469 |
| 2969   | 3217   | 0.653405 | 2.24E-05 | 0.000469 |
| 813    | 739    | 0.633244 | 2.32E-05 | 0.000485 |
| 3569   | 3416   | 0.666208 | 2.32E-05 | 0.000485 |
| 11864  | 12309  | 1.504841 | 2.35E-05 | 0.000489 |
| 2095   | 2437   | 0.682302 | 2.40E-05 | 0.0005   |
| 12018  | 11158  | 0.683428 | 2.43E-05 | 0.000504 |
| 115    | 122    | 2.510757 | 2.43E-05 | 0.000504 |
| 37590  | 45754  | 1.477406 | 2.45E-05 | 0.000508 |
| 571    | 605    | 0.601123 | 2.47E-05 | 0.000511 |
| 6706   | 7335   | 0.696231 | 2.60E-05 | 0.000536 |
| 11931  | 11554  | 0.68277  | 2.62E-05 | 0.000541 |
| 14138  | 12388  | 1.428348 | 2.65E-05 | 0.000545 |
| 2586   | 2682   | 1.527341 | 2.65E-05 | 0.000546 |
| 5067   | 5437   | 0.684216 | 2.70E-05 | 0.000554 |
| 1051   | 1092   | 0.636097 | 2.77E-05 | 0.000568 |
| 5426   | 4585   | 1.468169 | 2.90E-05 | 0.000593 |
| 925    | 1002   | 0.604118 | 2.91E-05 | 0.000594 |
| 185    | 366    | 0.564435 | 2.93E-05 | 0.000598 |
| 235    | 318    | 0.550357 | 2.93E-05 | 0.000598 |
| 2182   | 1701   | 1.61987  | 2.97E-05 | 0.000604 |
| 13616  | 12092  | 1.43624  | 2.97E-05 | 0.000605 |
| 13254  | 12758  | 0.662606 | 2.99E-05 | 0.000607 |
| 7195   | 5871   | 1.473573 | 3.10E-05 | 0.000628 |
| 3175   | 2724   | 0.62496  | 3.11E-05 | 0.000629 |
| 4606   | 4623   | 0.68604  | 3.13E-05 | 0.000633 |
| 9922   | 8340   | 1.463594 | 3.14E-05 | 0.000634 |
| 12612  | 12081  | 0.686256 | 3.15E-05 | 0.000636 |
| 5505   | 6410   | 0.706569 | 3.16E-05 | 0.000636 |
| 1224   | 1368   | 0.656409 | 3.21E-05 | 0.000645 |
| 438    | 376    | 0.596237 | 3.28E-05 | 0.000658 |
| 99     | 84     | 0.52869  | 3.31E-05 | 0.000664 |
| 15544  | 16399  | 0.655806 | 3.41E-05 | 0.000682 |
| 170761 | 227702 | 0.690682 | 3.53E-05 | 0.000704 |
| 13466  | 12723  | 1.449428 | 3.55E-05 | 0.000708 |
| 1114   | 1228   | 1.619955 | 3.59E-05 | 0.000715 |
| 2207   | 2511   | 0.709403 | 3.69E-05 | 0.000735 |
| 622    | 634    | 1.746357 | 3.73E-05 | 0.000741 |
| 2972   | 3388   | 0.676385 | 3.77E-05 | 0.000748 |
| 2154   | 2934   | 0.725148 | 3.78E-05 | 0.000748 |
| 101    | 56     | 0.620422 | 3.79E-05 | 0.00075  |
| 8606   | 7471   | 0.678213 | 3.90E-05 | 0.000771 |
| 11524  | 10553  | 1.49286  | 3.94E-05 | 0.000776 |
| 5214   | 4953   | 0.64903  | 3.95E-05 | 0.000778 |

|       |       |          |          |          |
|-------|-------|----------|----------|----------|
| 71    | 40    | 0.451535 | 3.96E-05 | 0.00078  |
| 758   | 740   | 1.800926 | 3.99E-05 | 0.000783 |
| 3183  | 3391  | 0.678162 | 4.03E-05 | 0.00079  |
| 4101  | 4059  | 0.698685 | 4.04E-05 | 0.000791 |
| 5442  | 5814  | 1.446193 | 4.04E-05 | 0.000791 |
| 4488  | 4798  | 0.68592  | 4.09E-05 | 0.000799 |
| 1111  | 704   | 1.809352 | 4.11E-05 | 0.000802 |
| 6711  | 6623  | 0.675381 | 4.16E-05 | 0.00081  |
| 21401 | 17451 | 1.421935 | 4.21E-05 | 0.000819 |
| 1579  | 835   | 1.62578  | 4.25E-05 | 0.000825 |
| 83131 | 58767 | 0.662882 | 4.26E-05 | 0.000826 |
| 6135  | 6733  | 0.678764 | 4.28E-05 | 0.000829 |
| 2042  | 2068  | 0.652434 | 4.36E-05 | 0.000843 |
| 3383  | 3446  | 0.694952 | 4.40E-05 | 0.00085  |
| 5444  | 6251  | 0.676809 | 4.52E-05 | 0.000872 |
| 1121  | 1095  | 0.625526 | 4.65E-05 | 0.000895 |
| 2616  | 2381  | 0.663498 | 4.69E-05 | 0.000902 |
| 2428  | 2480  | 1.560887 | 4.69E-05 | 0.000902 |
| 297   | 364   | 0.614547 | 4.74E-05 | 0.00091  |
| 6372  | 4286  | 1.453245 | 4.76E-05 | 0.000913 |
| 6594  | 5539  | 1.440349 | 4.80E-05 | 0.000918 |
| 4710  | 4379  | 1.429754 | 4.89E-05 | 0.000934 |
| 2584  | 2920  | 0.662461 | 4.92E-05 | 0.000939 |
| 7040  | 8123  | 0.708323 | 4.95E-05 | 0.000942 |
| 3611  | 3057  | 1.479504 | 4.94E-05 | 0.000942 |
| 14524 | 13032 | 1.383404 | 4.98E-05 | 0.000947 |
| 7573  | 6917  | 1.465789 | 5.07E-05 | 0.000961 |
| 6215  | 6672  | 0.722259 | 5.14E-05 | 0.000975 |
| 8696  | 8145  | 0.676487 | 5.19E-05 | 0.000981 |
| 1721  | 1956  | 0.647956 | 5.19E-05 | 0.000981 |
| 2995  | 3506  | 0.691516 | 5.23E-05 | 0.000988 |
| 4457  | 4557  | 0.699804 | 5.46E-05 | 0.00103  |
| 28842 | 26913 | 0.651637 | 5.51E-05 | 0.001038 |
| 23239 | 20958 | 1.47756  | 5.54E-05 | 0.001042 |
| 7585  | 9471  | 0.698141 | 5.57E-05 | 0.001045 |
| 15569 | 16694 | 1.520481 | 5.57E-05 | 0.001045 |
| 1390  | 1511  | 0.661309 | 5.66E-05 | 0.00106  |
| 22777 | 22117 | 1.459511 | 5.68E-05 | 0.001062 |
| 68    | 102   | 0.462973 | 5.81E-05 | 0.001086 |
| 597   | 676   | 0.610513 | 5.85E-05 | 0.00109  |
| 33907 | 28493 | 0.664811 | 5.88E-05 | 0.001095 |
| 5705  | 3996  | 1.461206 | 5.96E-05 | 0.001109 |
| 19168 | 17809 | 0.677114 | 6.05E-05 | 0.001124 |
| 150   | 14    | 2.759202 | 6.15E-05 | 0.001141 |
| 421   | 471   | 0.626216 | 6.16E-05 | 0.001142 |
| 289   | 377   | 0.596071 | 6.20E-05 | 0.001147 |
| 1363  | 1338  | 0.69346  | 6.30E-05 | 0.001164 |
| 5890  | 5360  | 1.439477 | 6.33E-05 | 0.001168 |
| 1217  | 1224  | 0.682123 | 6.40E-05 | 0.00118  |
| 3426  | 2827  | 1.410042 | 6.47E-05 | 0.001191 |
| 17164 | 14351 | 1.43556  | 6.57E-05 | 0.001208 |

|        |        |          |          |          |
|--------|--------|----------|----------|----------|
| 4228   | 4254   | 1.491168 | 6.72E-05 | 0.001235 |
| 1058   | 1054   | 1.640884 | 6.87E-05 | 0.00126  |
| 5693   | 5722   | 0.70078  | 7.19E-05 | 0.001316 |
| 16968  | 15268  | 1.41112  | 7.26E-05 | 0.001327 |
| 5970   | 6399   | 1.448182 | 7.33E-05 | 0.001339 |
| 663    | 710    | 0.586889 | 7.47E-05 | 0.001362 |
| 832    | 838    | 1.722244 | 7.51E-05 | 0.001369 |
| 8733   | 7751   | 1.400528 | 7.65E-05 | 0.001391 |
| 2185   | 3009   | 0.704424 | 7.67E-05 | 0.001393 |
| 2362   | 2348   | 0.704263 | 7.83E-05 | 0.001421 |
| 5883   | 5821   | 1.419194 | 7.89E-05 | 0.00143  |
| 11067  | 13521  | 0.7275   | 8.04E-05 | 0.001453 |
| 460    | 429    | 0.642939 | 8.04E-05 | 0.001453 |
| 779818 | 801731 | 0.700087 | 8.33E-05 | 0.001504 |
| 25273  | 22116  | 1.318175 | 8.42E-05 | 0.001519 |
| 956    | 882    | 0.617167 | 8.45E-05 | 0.001521 |
| 1186   | 1204   | 0.679852 | 8.51E-05 | 0.001529 |
| 3411   | 2957   | 1.464733 | 8.51E-05 | 0.001529 |
| 757    | 685    | 0.597439 | 8.74E-05 | 0.001568 |
| 86656  | 66344  | 1.441733 | 8.85E-05 | 0.001586 |
| 3043   | 3132   | 0.702978 | 8.87E-05 | 0.001587 |
| 9496   | 10250  | 0.717199 | 8.95E-05 | 0.001599 |
| 15081  | 15079  | 1.370787 | 9.04E-05 | 0.001613 |
| 1288   | 1194   | 1.527736 | 9.07E-05 | 0.001617 |
| 1863   | 1851   | 1.540052 | 9.24E-05 | 0.001645 |
| 26627  | 21518  | 1.395097 | 9.71E-05 | 0.001725 |
| 925    | 935    | 0.671756 | 9.71E-05 | 0.001725 |
| 74659  | 60060  | 1.431961 | 9.73E-05 | 0.001725 |
| 8024   | 9905   | 1.428341 | 9.80E-05 | 0.001736 |
| 2204   | 1672   | 1.570619 | 9.89E-05 | 0.00175  |
| 138    | 83     | 2.566547 | 9.92E-05 | 0.001754 |
| 7402   | 9283   | 0.724976 | 9.98E-05 | 0.001755 |
| 2364   | 1579   | 1.565541 | 9.98E-05 | 0.001755 |
| 626    | 721    | 1.772515 | 9.98E-05 | 0.001755 |
| 4100   | 3809   | 0.710994 | 9.99E-05 | 0.001755 |
| 5444   | 5239   | 1.461882 | 1.00E-04 | 0.001756 |
| 6176   | 6476   | 0.707905 | 0.000101 | 0.001774 |
| 1689   | 1570   | 0.671567 | 0.000102 | 0.00178  |
| 7348   | 6480   | 1.359857 | 0.000103 | 0.001803 |
| 21804  | 21249  | 1.444174 | 0.000104 | 0.001817 |
| 78660  | 73042  | 0.672775 | 0.000104 | 0.001817 |
| 852    | 1028   | 0.665494 | 0.000105 | 0.001822 |
| 650    | 759    | 0.627413 | 0.000106 | 0.001848 |
| 367    | 635    | 0.652435 | 0.000107 | 0.001856 |
| 9543   | 7470   | 1.398447 | 0.000107 | 0.001857 |
| 3577   | 3206   | 1.418051 | 0.000109 | 0.001884 |
| 3946   | 4509   | 0.726264 | 0.000109 | 0.001887 |
| 12391  | 10631  | 1.357896 | 0.000111 | 0.001913 |
| 774    | 611    | 1.720307 | 0.000113 | 0.001956 |
| 8987   | 10077  | 1.400773 | 0.000114 | 0.001975 |
| 4448   | 4365   | 1.427238 | 0.000115 | 0.001983 |

|       |       |          |          |          |
|-------|-------|----------|----------|----------|
| 13121 | 11925 | 1.386219 | 0.000116 | 0.002    |
| 1350  | 1515  | 0.684985 | 0.000116 | 0.002    |
| 12758 | 11164 | 1.428844 | 0.000119 | 0.002041 |
| 18598 | 18025 | 1.422803 | 0.000119 | 0.002048 |
| 322   | 459   | 0.650831 | 0.00012  | 0.002049 |
| 1801  | 1908  | 0.677053 | 0.000121 | 0.002079 |
| 558   | 443   | 1.660264 | 0.000123 | 0.002104 |
| 1407  | 1466  | 1.55615  | 0.000129 | 0.002195 |
| 516   | 717   | 0.610941 | 0.000132 | 0.002245 |
| 171   | 148   | 0.526973 | 0.000133 | 0.002256 |
| 1449  | 1679  | 1.553721 | 0.000133 | 0.00226  |
| 9492  | 10236 | 0.720925 | 0.000136 | 0.002317 |
| 2052  | 1748  | 1.355339 | 0.00014  | 0.002381 |
| 5207  | 5627  | 1.430763 | 0.000145 | 0.002455 |
| 865   | 911   | 0.641189 | 0.000147 | 0.002489 |
| 428   | 343   | 0.603409 | 0.000151 | 0.002551 |
| 10966 | 8798  | 1.279955 | 0.000154 | 0.002602 |
| 2110  | 2448  | 0.660175 | 0.000155 | 0.002616 |
| 2026  | 1962  | 0.674051 | 0.000156 | 0.002632 |
| 1649  | 2020  | 0.709101 | 0.000157 | 0.002642 |
| 2058  | 2022  | 1.513296 | 0.000159 | 0.00266  |
| 777   | 907   | 0.63937  | 0.000158 | 0.00266  |
| 0     | 0     | 0.047364 | 0.000162 | 0.002712 |
| 656   | 658   | 0.638426 | 0.000162 | 0.002712 |
| 2068  | 2438  | 1.501241 | 0.000163 | 0.002725 |
| 1544  | 1478  | 0.665944 | 0.000165 | 0.00276  |
| 764   | 716   | 0.689727 | 0.000168 | 0.002804 |
| 1444  | 1923  | 0.718006 | 0.00017  | 0.002825 |
| 3665  | 4097  | 0.703968 | 0.000173 | 0.002878 |
| 4131  | 3973  | 1.388349 | 0.000175 | 0.002907 |
| 5863  | 3171  | 1.425511 | 0.000175 | 0.002908 |
| 2901  | 3180  | 1.430172 | 0.000177 | 0.002941 |
| 2038  | 1928  | 0.698291 | 0.000182 | 0.003019 |
| 6475  | 7239  | 0.722902 | 0.000184 | 0.003048 |
| 6324  | 5336  | 1.441453 | 0.000185 | 0.003055 |
| 383   | 490   | 0.692257 | 0.000187 | 0.003091 |
| 7979  | 7191  | 1.396156 | 0.000189 | 0.003111 |
| 567   | 696   | 0.66689  | 0.000189 | 0.003111 |
| 15531 | 12878 | 1.376044 | 0.000189 | 0.003111 |
| 497   | 211   | 1.862144 | 0.000191 | 0.003139 |
| 1143  | 903   | 1.610003 | 0.000193 | 0.003165 |
| 3175  | 3002  | 0.719319 | 0.000193 | 0.003167 |
| 1416  | 1245  | 0.66682  | 0.000196 | 0.003212 |
| 3967  | 4391  | 1.398584 | 0.0002   | 0.003271 |
| 350   | 226   | 0.579302 | 0.000206 | 0.003361 |
| 12444 | 16077 | 0.718032 | 0.000207 | 0.003379 |
| 1430  | 1534  | 0.673957 | 0.00021  | 0.00342  |
| 19494 | 19487 | 0.706958 | 0.000211 | 0.003428 |
| 275   | 275   | 0.550748 | 0.000211 | 0.003434 |
| 47492 | 43164 | 0.690532 | 0.000211 | 0.003434 |
| 16220 | 14879 | 0.700084 | 0.000216 | 0.003506 |

|       |       |          |          |          |
|-------|-------|----------|----------|----------|
| 1601  | 1928  | 0.683788 | 0.000216 | 0.003506 |
| 2026  | 1557  | 0.739051 | 0.00022  | 0.003553 |
| 13272 | 10782 | 1.390043 | 0.000227 | 0.003663 |
| 1791  | 1981  | 0.664483 | 0.000227 | 0.003667 |
| 1449  | 1576  | 0.682894 | 0.000236 | 0.003813 |
| 807   | 707   | 0.648022 | 0.000239 | 0.003843 |
| 11803 | 9863  | 1.355633 | 0.00024  | 0.00386  |
| 4106  | 3811  | 1.440807 | 0.000244 | 0.003921 |
| 6778  | 5584  | 1.424126 | 0.000245 | 0.00394  |
| 2243  | 2307  | 1.444465 | 0.000248 | 0.003975 |
| 14089 | 11595 | 1.366542 | 0.000252 | 0.004037 |
| 4930  | 3246  | 1.351954 | 0.000253 | 0.004042 |
| 6344  | 5002  | 1.397153 | 0.000253 | 0.004042 |
| 9673  | 9753  | 0.723831 | 0.000255 | 0.004071 |
| 11649 | 10645 | 1.379148 | 0.000257 | 0.004101 |
| 3733  | 4901  | 0.763846 | 0.000261 | 0.004159 |
| 10780 | 9402  | 1.360321 | 0.000262 | 0.004165 |
| 2200  | 2798  | 0.687463 | 0.000263 | 0.004174 |
| 381   | 567   | 0.636178 | 0.000264 | 0.004188 |
| 686   | 609   | 1.735767 | 0.000265 | 0.004198 |
| 3109  | 3019  | 0.700271 | 0.000266 | 0.004219 |
| 1137  | 1233  | 0.687661 | 0.000269 | 0.004255 |
| 26397 | 25121 | 0.691963 | 0.000269 | 0.004256 |
| 8023  | 8942  | 1.423913 | 0.000271 | 0.004283 |
| 6132  | 5818  | 1.434185 | 0.000273 | 0.004298 |
| 11502 | 10386 | 1.410832 | 0.000274 | 0.004313 |
| 2597  | 1538  | 1.447071 | 0.000282 | 0.004428 |
| 982   | 1168  | 0.736049 | 0.000282 | 0.004437 |
| 4653  | 4546  | 1.389858 | 0.000283 | 0.004444 |
| 2117  | 1859  | 1.50389  | 0.000286 | 0.004486 |
| 429   | 49    | 2.518274 | 0.00029  | 0.004545 |
| 339   | 439   | 1.843655 | 0.000292 | 0.004575 |
| 11210 | 11216 | 0.712404 | 0.000293 | 0.00458  |
| 6136  | 5026  | 1.377137 | 0.000295 | 0.004597 |
| 83723 | 63490 | 0.698147 | 0.000304 | 0.004734 |
| 935   | 822   | 0.678216 | 0.000304 | 0.004734 |
| 488   | 515   | 0.651451 | 0.000305 | 0.00475  |
| 3309  | 3114  | 1.45296  | 0.000308 | 0.004783 |
| 2124  | 1493  | 1.489366 | 0.000309 | 0.004794 |
| 4813  | 5053  | 0.707393 | 0.000309 | 0.004794 |
| 41392 | 32685 | 1.381636 | 0.000312 | 0.004826 |
| 9619  | 7522  | 1.357519 | 0.000317 | 0.004904 |
| 12507 | 10073 | 1.346276 | 0.000317 | 0.004904 |
| 16607 | 13100 | 0.691738 | 0.000319 | 0.004927 |
| 5028  | 5092  | 0.722275 | 0.00032  | 0.004927 |
| 6054  | 4834  | 1.431164 | 0.000328 | 0.005047 |
| 2892  | 2639  | 1.405069 | 0.000339 | 0.005221 |
| 3718  | 4033  | 0.72778  | 0.00034  | 0.005224 |
| 8565  | 8761  | 1.363359 | 0.000344 | 0.005269 |
| 3790  | 3756  | 0.73623  | 0.000344 | 0.005269 |
| 2847  | 2287  | 0.702028 | 0.000348 | 0.005326 |

|        |        |          |          |          |
|--------|--------|----------|----------|----------|
| 569    | 446    | 0.663881 | 0.000353 | 0.005406 |
| 10845  | 13322  | 1.429383 | 0.000357 | 0.005453 |
| 1384   | 1494   | 0.688232 | 0.000357 | 0.005457 |
| 4207   | 3977   | 0.73801  | 0.00036  | 0.005483 |
| 81865  | 74547  | 1.413457 | 0.000362 | 0.005515 |
| 4861   | 5498   | 0.729856 | 0.000364 | 0.005523 |
| 16579  | 14712  | 0.709908 | 0.000364 | 0.005523 |
| 13929  | 13036  | 0.710343 | 0.000363 | 0.005523 |
| 1686   | 1640   | 0.718663 | 0.000366 | 0.005558 |
| 13215  | 7558   | 0.695365 | 0.00037  | 0.005607 |
| 3477   | 3011   | 0.692265 | 0.000372 | 0.005623 |
| 4984   | 4612   | 1.373477 | 0.000381 | 0.005742 |
| 21165  | 17367  | 0.71468  | 0.00038  | 0.005742 |
| 1513   | 1815   | 0.692799 | 0.000381 | 0.005742 |
| 251708 | 282278 | 0.727841 | 0.000384 | 0.005783 |
| 45555  | 34602  | 1.310137 | 0.000387 | 0.005826 |
| 5609   | 4780   | 1.36753  | 0.000389 | 0.005855 |
| 7417   | 6293   | 1.360301 | 0.000392 | 0.005883 |
| 1072   | 1226   | 0.705058 | 0.000395 | 0.005925 |
| 1381   | 1496   | 0.6911   | 0.0004   | 0.005991 |
| 18450  | 23293  | 0.735406 | 0.0004   | 0.005993 |
| 4509   | 3628   | 0.688317 | 0.000403 | 0.006024 |
| 22798  | 21174  | 1.368176 | 0.000404 | 0.00603  |
| 2692   | 2536   | 0.70154  | 0.000412 | 0.006148 |
| 169    | 146    | 2.007847 | 0.000412 | 0.00615  |
| 195    | 283    | 0.618633 | 0.000416 | 0.006191 |
| 1469   | 1668   | 1.393954 | 0.000416 | 0.006191 |
| 4028   | 3353   | 1.373136 | 0.000419 | 0.006233 |
| 5133   | 4405   | 1.385667 | 0.00042  | 0.006242 |
| 112550 | 146194 | 1.377524 | 0.000422 | 0.00625  |
| 21872  | 14986  | 1.334227 | 0.000422 | 0.00625  |
| 2855   | 4427   | 0.788813 | 0.000423 | 0.006258 |
| 7667   | 5324   | 1.346257 | 0.000423 | 0.006258 |
| 486    | 562    | 1.782028 | 0.000426 | 0.006291 |
| 7618   | 6404   | 0.735735 | 0.000429 | 0.006333 |
| 744    | 438    | 1.619817 | 0.00043  | 0.006338 |
| 35347  | 43464  | 0.727386 | 0.000432 | 0.006359 |
| 54266  | 50551  | 1.40286  | 0.000434 | 0.006377 |
| 45780  | 44946  | 1.40972  | 0.000434 | 0.006384 |
| 26120  | 29967  | 0.727854 | 0.00044  | 0.006456 |
| 266    | 264    | 0.578154 | 0.000443 | 0.006488 |
| 832    | 925    | 0.651062 | 0.000444 | 0.006499 |
| 5611   | 5260   | 1.404207 | 0.000447 | 0.006544 |
| 11351  | 11225  | 1.37666  | 0.000454 | 0.00664  |
| 7385   | 5713   | 1.255108 | 0.000456 | 0.00664  |
| 2975   | 2666   | 1.399111 | 0.000455 | 0.00664  |
| 4714   | 5391   | 0.745924 | 0.000456 | 0.00664  |
| 72     | 67     | 0.496777 | 0.000462 | 0.006727 |
| 13470  | 11085  | 1.360305 | 0.000463 | 0.006739 |
| 6514   | 5751   | 1.353988 | 0.000464 | 0.006747 |
| 2068   | 1739   | 0.684033 | 0.000467 | 0.006783 |

|         |         |          |          |          |
|---------|---------|----------|----------|----------|
| 2202    | 1115    | 1.394768 | 0.000468 | 0.006785 |
| 456     | 402     | 0.601845 | 0.000471 | 0.006814 |
| 17151   | 17359   | 0.731996 | 0.000477 | 0.0069   |
| 33281   | 40128   | 0.689633 | 0.00048  | 0.006932 |
| 2711    | 2608    | 0.71135  | 0.000483 | 0.006961 |
| 1008    | 1052    | 0.674378 | 0.000483 | 0.006961 |
| 1422    | 967     | 1.450202 | 0.000489 | 0.007046 |
| 17177   | 15906   | 1.343412 | 0.00049  | 0.007046 |
| 1500413 | 1476784 | 0.734191 | 0.000502 | 0.00722  |
| 2398    | 1537    | 1.499458 | 0.000503 | 0.007223 |
| 5432    | 6089    | 0.749796 | 0.000504 | 0.007224 |
| 1982    | 1270    | 1.456324 | 0.000505 | 0.007235 |
| 4295    | 4165    | 1.321868 | 0.000506 | 0.00725  |
| 683     | 526     | 1.681988 | 0.000507 | 0.007259 |
| 7506    | 6078    | 0.703099 | 0.000511 | 0.007298 |
| 1835    | 2163    | 0.685624 | 0.000511 | 0.007299 |
| 7151    | 5715    | 1.325413 | 0.000515 | 0.00733  |
| 28782   | 29784   | 1.352705 | 0.000514 | 0.00733  |
| 9362    | 8817    | 1.404068 | 0.000519 | 0.00738  |
| 3969    | 4193    | 1.383314 | 0.000529 | 0.007504 |
| 3568    | 3301    | 0.699521 | 0.000529 | 0.007504 |
| 2845    | 2551    | 1.389721 | 0.000529 | 0.007504 |
| 4845    | 5201    | 1.372764 | 0.00054  | 0.007652 |
| 22710   | 23458   | 1.374628 | 0.000548 | 0.007752 |
| 5183    | 4267    | 1.363477 | 0.000559 | 0.007913 |
| 1743    | 1593    | 1.406076 | 0.000565 | 0.007963 |
| 8458    | 9166    | 1.377016 | 0.000565 | 0.007963 |
| 528     | 524     | 0.650567 | 0.000564 | 0.007963 |
| 2880    | 2859    | 1.413341 | 0.000566 | 0.00798  |
| 3842    | 2785    | 1.38898  | 0.000571 | 0.00803  |
| 59363   | 49633   | 0.706601 | 0.000572 | 0.008036 |
| 23700   | 17318   | 1.34808  | 0.000579 | 0.008135 |
| 917     | 1286    | 0.714006 | 0.000582 | 0.008166 |
| 11      | 36      | 7.844013 | 0.000586 | 0.008208 |
| 2349    | 2595    | 1.404774 | 0.00059  | 0.008265 |
| 6894    | 8227    | 0.775662 | 0.000606 | 0.008467 |
| 1487    | 1743    | 0.718492 | 0.000606 | 0.008467 |
| 20      | 39      | 0.429591 | 0.000614 | 0.008567 |
| 66993   | 73750   | 0.731696 | 0.000618 | 0.008614 |
| 15      | 26      | 0.563905 | 0.000625 | 0.008711 |
| 2074    | 2109    | 1.41078  | 0.000637 | 0.008869 |
| 1287705 | 1257836 | 0.732563 | 0.000643 | 0.008939 |
| 13575   | 14670   | 0.748615 | 0.000644 | 0.008951 |
| 8639    | 8026    | 0.714221 | 0.000646 | 0.008959 |
| 4469    | 3813    | 1.382896 | 0.000647 | 0.008967 |
| 14428   | 14699   | 1.333605 | 0.000649 | 0.008995 |
| 555     | 493     | 0.701914 | 0.00065  | 0.008995 |
| 4063    | 3486    | 1.372216 | 0.000651 | 0.008997 |
| 10960   | 13821   | 0.727366 | 0.000653 | 0.009009 |
| 5266    | 4385    | 1.388784 | 0.000654 | 0.009009 |
| 219     | 178     | 2.025239 | 0.000652 | 0.009009 |

|       |       |          |          |          |
|-------|-------|----------|----------|----------|
| 149   | 132   | 0.596617 | 0.000656 | 0.00904  |
| 443   | 530   | 0.652538 | 0.000657 | 0.009043 |
| 8612  | 8085  | 0.727193 | 0.000661 | 0.009087 |
| 551   | 272   | 1.738112 | 0.000663 | 0.009108 |
| 100   | 91    | 0.590403 | 0.000665 | 0.009116 |
| 5840  | 6288  | 0.6994   | 0.000671 | 0.009194 |
| 9687  | 8596  | 1.367161 | 0.000679 | 0.009293 |
| 301   | 325   | 0.622972 | 0.000685 | 0.009371 |
| 1057  | 1258  | 1.56078  | 0.000689 | 0.00942  |
| 100   | 125   | 0.499033 | 0.000714 | 0.009735 |
| 525   | 686   | 0.674281 | 0.000714 | 0.009735 |
| 1540  | 1519  | 1.379188 | 0.000716 | 0.009752 |
| 11202 | 14867 | 1.370491 | 0.000723 | 0.009834 |
| 6849  | 4897  | 1.326804 | 0.000724 | 0.009845 |
| 1413  | 1073  | 1.454545 | 0.000726 | 0.009858 |
| 464   | 353   | 1.752142 | 0.00073  | 0.009894 |
| 87    | 88    | 0.534472 | 0.00073  | 0.009894 |
| 2008  | 2006  | 1.504566 | 0.00073  | 0.009894 |
| 5755  | 4925  | 1.350556 | 0.000734 | 0.009928 |
| 83620 | 79651 | 0.708973 | 0.00074  | 0.009948 |



| Gene Name         | Ethanol-1 | Ethanol-2 | Ethanol-3 | Ethanol-4 |
|-------------------|-----------|-----------|-----------|-----------|
| hsp70l            | 342       | 458       | 328       | 383       |
| hsp70             | 193       | 198       | 193       | 168       |
| zgc-174006        | 155       | 154       | 126       | 168       |
| klf11a            | 2674      | 3102      | 2538      | 2716      |
| zgc-92590         | 4704      | 6888      | 4087      | 3653      |
| slc1a4            | 1426      | 1625      | 1133      | 1137      |
| lepb              | 13        | 10        | 3         | 10        |
| ces3              | 4315      | 6059      | 4461      | 3647      |
| opn1mw1           | 39932     | 40266     | 36622     | 31005     |
| zgc-154142        | 13043     | 16288     | 11959     | 12069     |
| cyp24a1           | 57170     | 44094     | 32291     | 35088     |
| cyt1l             | 151345    | 147856    | 103974    | 108550    |
| zgc-154020        | 907       | 558       | 1835      | 1288      |
| zgc-136854        | 10        | 10        | 34        | 21        |
| si-ch73-6k14.1    | 56        | 98        | 105       | 173       |
| fabp10a           | 69809     | 69991     | 46894     | 47072     |
| sesn2             | 850       | 886       | 785       | 695       |
| cyp4v2            | 6635      | 6868      | 4133      | 4382      |
| gip               | 498072    | 493815    | 399790    | 406198    |
| ahsg              | 4863      | 4264      | 3936      | 3957      |
| gtpbp1            | 6092      | 6597      | 4637      | 5243      |
| atf3              | 2112      | 3083      | 2933      | 4627      |
| fosl1             | 441       | 940       | 1384      | 2358      |
| ins               | 1900      | 1764      | 1555      | 1447      |
| ela2              | 260724    | 263652    | 254875    | 311061    |
| zgc-110266        | 899       | 811       | 680       | 731       |
| LOC562139         | 92091     | 103156    | 85750     | 106721    |
| opn1sw1           | 218147    | 206419    | 163796    | 163500    |
| zgc-136461        | 150291    | 170652    | 146960    | 175670    |
| dpys              | 3840      | 4074      | 3243      | 3266      |
| timp2b            | 931       | 1085      | 772       | 904       |
| rh50              | 1415      | 1421      | 1297      | 1028      |
| cyp2ad2           | 10529     | 10613     | 8173      | 8420      |
| ela3l             | 258811    | 265120    | 225532    | 277306    |
| zgc-110377        | 4431      | 3957      | 2964      | 3024      |
| fabp1b.1          | 6884      | 5200      | 5223      | 4367      |
| zgc-112199        | 52        | 50        | 27        | 48        |
| zgc-112992        | 574       | 968       | 500       | 586       |
| socs3b            | 4217      | 4250      | 4143      | 5727      |
| zgc-92137         | 94724     | 102600    | 74785     | 80317     |
| pmepa1            | 96463     | 97653     | 93218     | 97182     |
| si-ch211-107o23.1 | 882       | 958       | 702       | 678       |
| zgc-152911        | 379       | 380       | 595       | 574       |
| scd               | 297       | 357       | 215       | 246       |
| opn1sw2           | 47407     | 45347     | 37424     | 34227     |
| gc                | 15539     | 14586     | 10206     | 11273     |
| zgc-110064        | 18120     | 23985     | 13975     | 11315     |
| comtd1            | 567       | 656       | 516       | 442       |
| aldh1l1           | 18988     | 17436     | 11536     | 13205     |
| zgc-171537        | 810       | 1189      | 802       | 609       |
| klf11b            | 1473      | 1703      | 1671      | 1951      |

|                   |        |        |        |        |
|-------------------|--------|--------|--------|--------|
| pklr              | 81464  | 76057  | 66167  | 74709  |
| slc4a1            | 2974   | 4004   | 3366   | 3055   |
| grk7a             | 32695  | 34893  | 23717  | 26291  |
| psat1             | 1528   | 1436   | 1137   | 1197   |
| zgc-171704        | 30     | 24     | 25     | 23     |
| ctsbb             | 7276   | 7075   | 6224   | 7255   |
| fabp2             | 43206  | 43607  | 31343  | 30228  |
| zgc-113413        | 511    | 447    | 484    | 454    |
| vgll4             | 131091 | 133340 | 123107 | 129150 |
| tars              | 4431   | 4923   | 2986   | 3505   |
| dnajb1b           | 926    | 954    | 672    | 789    |
| opn1lw2           | 34071  | 34756  | 30630  | 23090  |
| alas2             | 1513   | 1780   | 1801   | 1580   |
| si-dkey-14d8.6    | 16405  | 17658  | 12165  | 15977  |
| si-dkey-14d8.7    | 1226   | 2104   | 1291   | 1395   |
| ugt1ab            | 6725   | 6757   | 4447   | 4940   |
| igfbp1b           | 55094  | 42523  | 40755  | 45868  |
| tfr1a             | 1216   | 1745   | 1308   | 1426   |
| ugt1a5            | 4995   | 4970   | 3352   | 3765   |
| habp2             | 2343   | 2533   | 1725   | 1701   |
| ugt1a1            | 7692   | 7447   | 5394   | 6074   |
| ebi3              | 724    | 726    | 631    | 649    |
| cyp2k6            | 460    | 410    | 339    | 351    |
| zgc-172140        | 49     | 54     | 177    | 67     |
| zgc-158404        | 821    | 583    | 468    | 525    |
| il1b              | 62     | 105    | 151    | 215    |
| zgc-174689        | 480    | 404    | 438    | 403    |
| ugt1a2            | 4792   | 4820   | 3268   | 3673   |
| ugt1a4            | 5067   | 5074   | 3465   | 3836   |
| sparcl1           | 3979   | 3913   | 2667   | 3347   |
| si-ch73-46j18.5   | 3599   | 4010   | 3093   | 3204   |
| ugt1a6            | 4668   | 4669   | 3119   | 3532   |
| cpa2              | 129    | 138    | 135    | 137    |
| zgc-165502        | 3692   | 4030   | 3494   | 3832   |
| ugt1a7            | 5194   | 4975   | 3577   | 3988   |
| ezh2              | 980    | 937    | 731    | 766    |
| elna              | 1050   | 980    | 1022   | 1138   |
| zgc-161979        | 21800  | 27635  | 17959  | 16554  |
| agxt2l1           | 4918   | 5180   | 3884   | 3881   |
| zgc-172225        | 1116   | 1497   | 993    | 1435   |
| f7i               | 1161   | 1344   | 1200   | 1030   |
| si-ch211-234p6.13 | 1110   | 1488   | 976    | 1423   |
| ela2l             | 392196 | 415305 | 353740 | 436070 |
| zgc-162925        | 1356   | 1562   | 1154   | 1154   |
| hspb9             | 2798   | 3221   | 2370   | 2281   |
| zgc-112146        | 1224   | 1258   | 945    | 940    |
| zgc-136551        | 3126   | 3158   | 2354   | 2587   |
| hspa5             | 14211  | 16366  | 12324  | 13938  |
| grifin            | 6275   | 6422   | 4310   | 4531   |
| cryaa             | 21642  | 23332  | 16713  | 18112  |
| hmgcra            | 2725   | 3190   | 2370   | 2045   |
| cpa5              | 249679 | 263304 | 210840 | 240228 |

|                 |         |         |         |         |
|-----------------|---------|---------|---------|---------|
| zgc-110286      | 102     | 98      | 83      | 94      |
| mipa            | 26187   | 28395   | 21384   | 25172   |
| six7            | 14680   | 19774   | 17415   | 21217   |
| LOC796384       | 1854    | 2157    | 1608    | 1381    |
| gys2            | 8033    | 7666    | 5292    | 6692    |
| ptrh1           | 263     | 286     | 240     | 222     |
| odc1            | 8694    | 11737   | 10503   | 9667    |
| hsp47           | 310     | 336     | 372     | 392     |
| cyt1            | 431021  | 470813  | 331157  | 370117  |
| zgc-194887      | 872     | 1003    | 922     | 909     |
| rdh1            | 8767    | 7620    | 6713    | 7209    |
| cyp2y3          | 9853    | 9345    | 7428    | 7806    |
| si-dkey-127j5.5 | 8603    | 8423    | 6417    | 6941    |
| mthfd2          | 376     | 422     | 269     | 299     |
| mipb            | 48135   | 49188   | 37895   | 47303   |
| zgc-172142      | 755     | 829     | 526     | 572     |
| LOC798846       | 269     | 322     | 287     | 207     |
| zgc-162630      | 9157    | 8982    | 7610    | 9369    |
| zgc-153027      | 451     | 383     | 420     | 453     |
| yars            | 4998    | 5649    | 3778    | 4490    |
| zgc-193613      | 140395  | 157887  | 119538  | 118354  |
| LOC568900       | 19502   | 20580   | 16890   | 20942   |
| lepa            | 27      | 27      | 25      | 31      |
| agxtb           | 44419   | 43741   | 34786   | 37113   |
| cldn5b          | 1088    | 1008    | 937     | 1113    |
| icn2            | 18945   | 17391   | 11772   | 11404   |
| c3b             | 4454    | 5554    | 4358    | 3919    |
| LOC559192       | 228     | 259     | 210     | 191     |
| abp1            | 13809   | 13412   | 10603   | 10705   |
| cish            | 7796    | 7666    | 6577    | 8415    |
| zgc-172290      | 12      | 13      | 12      | 8       |
| cyp2x9          | 1866    | 2037    | 1271    | 1593    |
| rbp2b           | 970     | 989     | 803     | 753     |
| hyou1           | 2412    | 2760    | 2043    | 2218    |
| tfa             | 51083   | 53937   | 45250   | 44850   |
| zgc-100868      | 8175    | 7429    | 7634    | 5869    |
| gh1             | 2493    | 1753    | 1830    | 2156    |
| zgc-91963       | 62      | 50      | 62      | 72      |
| LOC100002960    | 3131    | 3168    | 2408    | 2630    |
| gpx4a           | 34257   | 33177   | 22956   | 24207   |
| grk1b           | 4476    | 4509    | 3159    | 3161    |
| LOC567547       | 2500    | 2907    | 1892    | 2082    |
| pde6c           | 73855   | 80380   | 51297   | 56213   |
| zgc-163057      | 69      | 63      | 80      | 49      |
| si-ch211-81a5.8 | 3280    | 3649    | 2736    | 3110    |
| faah2b          | 1649    | 1642    | 1215    | 1196    |
| krt4            | 1979557 | 2037156 | 1651093 | 1558234 |
| rbp2a           | 11530   | 11332   | 8023    | 7916    |
| hspa4a          | 4382    | 5542    | 4035    | 4600    |
| uox             | 8844    | 7991    | 5006    | 6051    |
| zgc-153913      | 1522    | 1710    | 1286    | 1405    |
| zgc-112160      | 170399  | 183744  | 159404  | 177897  |

|                   |        |        |        |        |
|-------------------|--------|--------|--------|--------|
| zgc-172051        | 6342   | 6672   | 5728   | 5673   |
| slc1a8b           | 3559   | 4232   | 2670   | 2444   |
| dpyd              | 21663  | 22140  | 16275  | 18608  |
| cat               | 18028  | 17614  | 13638  | 14453  |
| gabra6a           | 2238   | 2476   | 1532   | 1491   |
| LOC570613         | 1975   | 2096   | 1736   | 1504   |
| cyp3a65           | 183083 | 155550 | 122452 | 127923 |
| elovl2            | 1386   | 1562   | 1143   | 1137   |
| mep1b             | 4497   | 4746   | 3436   | 3196   |
| junb              | 4617   | 7236   | 13025  | 20179  |
| asah2             | 9237   | 9427   | 7135   | 7381   |
| igf2b             | 5032   | 4885   | 3738   | 4287   |
| serpine1          | 886    | 1270   | 1240   | 1335   |
| igfbp2a           | 5936   | 5939   | 5133   | 5032   |
| si-ch211-234p6.12 | 6866   | 5165   | 4705   | 4962   |
| hbae1             | 4581   | 6927   | 6576   | 5274   |
| zgc-92406         | 1176   | 1434   | 917    | 910    |
| slc1a2a           | 6595   | 7174   | 5226   | 6305   |
| gnat2             | 52277  | 53150  | 38463  | 38734  |
| hmga1b            | 3814   | 4164   | 3062   | 3513   |
| stat3             | 8416   | 8116   | 6133   | 6857   |
| aqp10a            | 1138   | 1082   | 705    | 815    |
| hmbsb             | 573    | 602    | 453    | 492    |
| zgc-103559        | 1192   | 1211   | 985    | 911    |
| zgc-153932        | 1686   | 1718   | 2346   | 1316   |
| ctsl.1            | 35226  | 33966  | 31842  | 38708  |
| brf1a             | 1362   | 1319   | 985    | 1039   |
| zgc-73075         | 60949  | 63652  | 39735  | 49880  |
| cyp2k18           | 884    | 1110   | 835    | 684    |
| zgc-114180        | 3093   | 3197   | 2383   | 2415   |
| LOC567512         | 766    | 732    | 420    | 638    |
| cpa1              | 31358  | 29352  | 23404  | 29291  |
| gadd45aa          | 1000   | 980    | 1133   | 1312   |
| phgdh             | 3724   | 3938   | 2718   | 2876   |
| zgc-162331        | 2725   | 2936   | 2392   | 2558   |
| ndrg1l            | 13026  | 11052  | 10231  | 12257  |
| ahrra             | 2145   | 1782   | 1317   | 2652   |
| zgc-172079        | 4446   | 4149   | 3888   | 4532   |
| tfe3a             | 2245   | 2631   | 1596   | 1918   |
| mycl1a            | 1049   | 1245   | 1098   | 1312   |
| zgc-136337        | 30952  | 34466  | 30613  | 37240  |
| irf11             | 1262   | 1242   | 1470   | 1564   |
| aqp8a.2           | 3314   | 3288   | 2606   | 2802   |
| mmp9              | 1372   | 1276   | 1321   | 1100   |
| arr3l             | 117184 | 121623 | 73662  | 87968  |
| apoa1             | 139449 | 163036 | 103994 | 101297 |
| zgc-55406         | 93607  | 90278  | 67835  | 71880  |
| agmat             | 2020   | 2132   | 1713   | 1828   |
| hsp90a.2          | 10450  | 11800  | 11184  | 11242  |
| cp                | 22762  | 21659  | 18918  | 19642  |
| foxo3a            | 36416  | 37765  | 29038  | 31287  |
| cyp2n13           | 9608   | 10394  | 7417   | 7891   |

|                   |         |         |        |         |
|-------------------|---------|---------|--------|---------|
| pde6h             | 145741  | 135741  | 97637  | 112195  |
| slc25a3a          | 5649    | 5836    | 4492   | 4373    |
| rlbp1b            | 14526   | 14933   | 10897  | 10720   |
| zgc-92474         | 8649    | 8814    | 8188   | 7860    |
| cpb1              | 114328  | 128646  | 109466 | 129347  |
| zgc-92041         | 1041688 | 1058240 | 902919 | 1053489 |
| zgc-77938         | 3315    | 3056    | 2445   | 2945    |
| pm20d1.1          | 5082    | 5185    | 3790   | 3961    |
| pdia4             | 1450    | 1326    | 1338   | 1236    |
| prox2             | 1228    | 1365    | 941    | 1087    |
| stc1l             | 3852    | 3287    | 2414   | 3015    |
| zgc-172260        | 85      | 92      | 38     | 89      |
| cx50.5            | 659     | 768     | 477    | 412     |
| cell              | 35341   | 40486   | 30512  | 35087   |
| zgc-66382         | 709348  | 759453  | 628942 | 734042  |
| zgc-114170        | 6788    | 5657    | 5089   | 5872    |
| pygl              | 5063    | 4623    | 3594   | 4084    |
| zgc-153096        | 436     | 381     | 286    | 378     |
| LOC100005630      | 1402    | 1467    | 1403   | 1288    |
| zgc-172253        | 2173    | 2160    | 2000   | 2022    |
| epyc              | 4513    | 4516    | 4709   | 5112    |
| zgc-110200        | 6702    | 7209    | 5448   | 6370    |
| slc2a2            | 7147    | 6933    | 5259   | 5673    |
| si-ch211-219a15.3 | 699     | 724     | 512    | 633     |
| zgc-110409        | 4340    | 5096    | 3748   | 3838    |
| si-dkey-24111.1   | 3210    | 3373    | 2523   | 2856    |
| lpin1             | 105260  | 105810  | 75642  | 83875   |
| sult1st2          | 1272    | 1552    | 859    | 925     |
| zgc-136909        | 965     | 973     | 821    | 639     |
| gata1a            | 219     | 174     | 178    | 172     |
| sesn1             | 148204  | 130685  | 96097  | 111253  |
| guca1c            | 5682    | 5727    | 4474   | 4848    |
| si-dkey-45m5.4    | 541     | 546     | 465    | 501     |
| ugt5b3            | 1038    | 982     | 823    | 941     |
| zgc-113028        | 6582    | 6905    | 5475   | 6585    |
| angptl3           | 2464    | 2734    | 1778   | 1625    |
| crygm2c           | 1227    | 1022    | 625    | 850     |
| cd36              | 21944   | 22392   | 16690  | 17784   |
| acta1b            | 116714  | 128857  | 107861 | 82499   |
| lpl               | 54539   | 51499   | 37998  | 48995   |
| zgc-109930        | 27029   | 23584   | 22164  | 23180   |
| c6                | 1664    | 1851    | 1255   | 1687    |
| cx44.1            | 1351    | 1579    | 1102   | 1187    |
| aldob             | 625512  | 605730  | 423034 | 454154  |
| fbp1a             | 12417   | 12196   | 9384   | 10416   |
| zgc-171534        | 1708    | 1644    | 1373   | 2143    |
| tmem195           | 5654    | 4813    | 3612   | 4962    |
| dnmt6             | 5254    | 5321    | 4257   | 4680    |
| prph2b            | 22194   | 19934   | 14795  | 16201   |
| zgc-92763         | 2336    | 2473    | 1778   | 1513    |
| LOC563738         | 1851    | 1924    | 1580   | 1771    |
| try               | 844084  | 896245  | 753199 | 871336  |

|                   |        |        |        |        |
|-------------------|--------|--------|--------|--------|
| upb1              | 2798   | 2763   | 2130   | 2046   |
| asns              | 2786   | 3104   | 2087   | 2291   |
| pparaa            | 8482   | 8454   | 6249   | 7588   |
| fep15             | 5877   | 6052   | 5969   | 5828   |
| gchfr             | 2576   | 2501   | 1733   | 1896   |
| ttr               | 6625   | 6169   | 4004   | 4120   |
| zgc-114142        | 10903  | 10716  | 8417   | 9440   |
| tfr2              | 1390   | 1495   | 1220   | 1200   |
| cars              | 2804   | 2929   | 2159   | 2414   |
| si-ch211-284e20.8 | 1802   | 2056   | 1671   | 1892   |
| gstal             | 13335  | 11559  | 9068   | 9213   |
| LOC573653         | 6482   | 10099  | 8069   | 7896   |
| zgc-162356        | 14569  | 13445  | 9965   | 10054  |
| aars              | 37709  | 37753  | 26984  | 31005  |
| cdk5r2b           | 7964   | 8138   | 5962   | 7180   |
| zgc-153443        | 6979   | 8266   | 4716   | 5426   |
| zgc-101540        | 4530   | 4998   | 3322   | 3595   |
| zgc-63614         | 1373   | 1197   | 790    | 744    |
| mycn              | 9452   | 9350   | 6807   | 7306   |
| ankrd1b           | 10384  | 12999  | 8868   | 8901   |
| mep1a.2           | 3490   | 3976   | 3139   | 3302   |
| dio1              | 2671   | 2405   | 2006   | 1794   |
| serpina1          | 24331  | 22029  | 15765  | 18928  |
| stc2              | 2539   | 2583   | 1792   | 1936   |
| guca1e            | 521    | 820    | 538    | 448    |
| il12a             | 23     | 25     | 17     | 35     |
| si-busm1-118j2.5  | 6435   | 9864   | 7802   | 7696   |
| zgc-63647         | 4520   | 4665   | 3579   | 4149   |
| rangap1           | 711    | 836    | 532    | 536    |
| apobl             | 426856 | 519131 | 328930 | 341313 |
| xbp1              | 28155  | 30457  | 24006  | 26764  |
| mmp14b            | 5005   | 4944   | 4026   | 4804   |
| hig1              | 4816   | 5602   | 3939   | 3815   |
| zgc-66484         | 2982   | 2901   | 2100   | 2276   |
| manf              | 518    | 587    | 490    | 540    |
| LOC100006238      | 4268   | 4540   | 3575   | 3895   |
| hmbsa             | 739    | 830    | 621    | 654    |
| arg2              | 81087  | 81891  | 53126  | 59911  |
| il34              | 17     | 13     | 23     | 16     |
| acox1             | 8976   | 8430   | 6354   | 6847   |
| amy2a             | 129916 | 146864 | 102994 | 129938 |
| gcga              | 1194   | 1087   | 970    | 924    |
| mep1a.1           | 5599   | 6660   | 4592   | 5272   |
| fabp6             | 20884  | 22234  | 13439  | 12559  |
| zgc-110340        | 3861   | 4691   | 6852   | 7961   |
| gnb3b             | 45453  | 46755  | 40369  | 41106  |
| LOC564868         | 2763   | 2802   | 1984   | 2476   |
| slc34a2a          | 4848   | 5112   | 4222   | 4468   |
| zgc-171802        | 83     | 118    | 106    | 132    |
| ch25h             | 46     | 154    | 228    | 426    |
| xpnpep2           | 2512   | 2871   | 2172   | 2360   |
| desmb             | 5384   | 5435   | 4517   | 4294   |

|            |        |        |        |        |
|------------|--------|--------|--------|--------|
| scinla     | 20395  | 20644  | 13683  | 14280  |
| keras      | 1828   | 1956   | 1312   | 1237   |
| zgc-194131 | 26394  | 30101  | 21193  | 21206  |
| tdo2a      | 9354   | 8837   | 6550   | 7240   |
| cx28.9     | 5773   | 5441   | 3841   | 4169   |
| cx32.3     | 2889   | 3002   | 2382   | 2445   |
| zgc-162337 | 7850   | 6668   | 5036   | 4512   |
| zgc-153311 | 154    | 202    | 141    | 141    |
| zgc-158823 | 1482   | 1383   | 1083   | 1171   |
| e2f7       | 526    | 514    | 481    | 447    |
| ugt5b4     | 1168   | 1049   | 1002   | 998    |
| wars       | 1971   | 2187   | 1479   | 1627   |
| cad        | 26921  | 29957  | 21651  | 25718  |
| mpv17l2    | 552    | 649    | 469    | 500    |
| LOC798872  | 7191   | 4592   | 3425   | 3690   |
| zgc-92739  | 6781   | 6083   | 5953   | 6305   |
| jun        | 18610  | 21084  | 24539  | 30863  |
| zgc-56085  | 13854  | 15305  | 11606  | 11110  |
| zgc-195063 | 4773   | 5668   | 4744   | 5059   |
| icn        | 42110  | 36969  | 30776  | 28914  |
| zgc-112210 | 439    | 422    | 260    | 362    |
| smarca5    | 4982   | 5764   | 4063   | 3673   |
| a2ml       | 20660  | 21920  | 15026  | 15579  |
| pth2       | 595    | 668    | 467    | 414    |
| vdrb       | 9004   | 9892   | 5882   | 6961   |
| gnb5b      | 6627   | 6998   | 5038   | 5263   |
| cyp7a1a    | 9271   | 9577   | 5985   | 7795   |
| bbc3       | 4626   | 4152   | 3308   | 3585   |
| mao        | 14646  | 15401  | 10923  | 11921  |
| slc38a4    | 27685  | 24772  | 18081  | 17477  |
| adh8b      | 10939  | 10417  | 6764   | 7755   |
| pvalb5     | 5373   | 5290   | 3340   | 3551   |
| zgc-110354 | 871    | 923    | 1379   | 1176   |
| zgc-85752  | 2523   | 2414   | 1576   | 1982   |
| rhcg1      | 14272  | 16183  | 12081  | 12822  |
| invs       | 853    | 809    | 746    | 862    |
| lctlb      | 4518   | 4366   | 2883   | 3615   |
| atp1a1a.4  | 147031 | 146177 | 103120 | 110565 |
| LOC564844  | 846    | 845    | 722    | 721    |
| pnp4b      | 19301  | 20640  | 14969  | 16158  |
| rhcg2a     | 10179  | 11422  | 8513   | 9059   |
| cpb2       | 928    | 903    | 635    | 731    |
| zgc-153394 | 470    | 591    | 282    | 339    |
| zgc-111983 | 17617  | 20377  | 20550  | 14793  |
| pck2       | 21402  | 21457  | 15566  | 15656  |
| calrl      | 1884   | 1940   | 1814   | 1832   |
| mmp13a     | 635    | 528    | 573    | 722    |
| il6st      | 5592   | 5197   | 3822   | 4458   |
| mtp        | 7025   | 7245   | 5464   | 5905   |
| aldh9a1a   | 91381  | 90114  | 67875  | 74029  |
| bcl6ab     | 3225   | 3012   | 2427   | 2638   |
| pla2g12b   | 10531  | 12071  | 8683   | 8797   |

|                   |        |        |        |        |
|-------------------|--------|--------|--------|--------|
| zgc-56382         | 15048  | 17235  | 17312  | 12476  |
| LOC100005645      | 745    | 891    | 615    | 724    |
| zgc-136410        | 1434   | 1430   | 1142   | 1082   |
| zgc-153286        | 3245   | 2930   | 2741   | 2928   |
| slco1d1           | 10334  | 9892   | 7173   | 8048   |
| zgc-113651        | 32     | 20     | 32     | 24     |
| scp2              | 22831  | 22172  | 17435  | 20470  |
| guca1d            | 488    | 319    | 235    | 228    |
| igfbp1a           | 35358  | 27623  | 26569  | 27606  |
| LOC556575         | 3395   | 3879   | 2775   | 2849   |
| si-ch211-244a23.1 | 1406   | 1350   | 1391   | 1160   |
| syncrpl           | 4998   | 5514   | 4138   | 4586   |
| LOC100003647      | 504    | 445    | 741    | 907    |
| alg5              | 2745   | 2717   | 2032   | 2529   |
| guca1g            | 682    | 509    | 409    | 522    |
| zgc-112282        | 5154   | 5246   | 3478   | 4015   |
| hspd1             | 15584  | 17329  | 12749  | 14565  |
| hao2              | 2649   | 2805   | 2133   | 2362   |
| zgc-153102        | 1065   | 1071   | 731    | 949    |
| si-dkey-53p21.1   | 815    | 771    | 748    | 1013   |
| cpox              | 497    | 522    | 355    | 447    |
| rtn4rl2a          | 3287   | 3835   | 3419   | 2771   |
| zgc-174688        | 161    | 113    | 52     | 74     |
| gpd1b             | 10011  | 9827   | 8753   | 7659   |
| zgc-175088        | 4012   | 3485   | 2923   | 2892   |
| ctsh              | 3434   | 3511   | 2820   | 3181   |
| crot              | 3906   | 3998   | 3268   | 3446   |
| zgc-113232        | 6666   | 6301   | 5696   | 5404   |
| ugt5d1            | 436    | 445    | 330    | 285    |
| zgc-77082         | 1582   | 1455   | 1284   | 1433   |
| atf4b2            | 22206  | 23465  | 18711  | 22737  |
| si-ch211-235o23.1 | 1975   | 1851   | 1293   | 1547   |
| hells             | 814    | 941    | 678    | 645    |
| cyp2p8            | 1967   | 2043   | 1385   | 1560   |
| si-ch211-215l11.5 | 45891  | 36313  | 28565  | 25571  |
| slc43a1b          | 4016   | 4486   | 3019   | 3582   |
| si-ch211-105d11.2 | 2456   | 2624   | 1789   | 1975   |
| tm4sf5            | 2129   | 2146   | 1502   | 1682   |
| fbn2b             | 6965   | 7821   | 6329   | 7345   |
| mcm6              | 3092   | 3682   | 2878   | 3116   |
| epb41             | 950    | 1028   | 764    | 729    |
| cldn11a           | 2288   | 2084   | 1994   | 2109   |
| LOC100005476      | 3426   | 3149   | 2280   | 2170   |
| zgc-153258        | 2354   | 2294   | 1952   | 1909   |
| slc7a3            | 26343  | 27193  | 20146  | 19624  |
| zgc-136930        | 166214 | 162224 | 151045 | 129936 |
| zgc-174917        | 441    | 274    | 839    | 742    |
| s100s             | 3637   | 3175   | 2332   | 2199   |
| LOC797776         | 702    | 737    | 688    | 655    |
| dhrs1             | 7005   | 6454   | 5407   | 5948   |
| iars              | 44813  | 48368  | 34512  | 41338  |
| comta             | 1481   | 1557   | 1283   | 1421   |



|                   |         |         |        |        |
|-------------------|---------|---------|--------|--------|
| zgc-114041        | 692     | 627     | 450    | 553    |
| zgc-110053        | 1725    | 1861    | 1243   | 1412   |
| ipo8              | 5300    | 5649    | 3814   | 4168   |
| calua             | 1604    | 1792    | 1555   | 1678   |
| ociad2            | 1135    | 1092    | 880    | 819    |
| si-rp71-1p14.10   | 1944    | 1737    | 1402   | 1700   |
| si-dkeyp-1h4.3    | 171     | 154     | 159    | 160    |
| zgc-92533         | 1157795 | 1167444 | 960295 | 883392 |
| zgc-173961        | 2409    | 2348    | 1760   | 1460   |
| crygmx            | 29609   | 29577   | 21082  | 26014  |
| junbl             | 8023    | 13793   | 37588  | 61707  |
| lim2.5            | 5407    | 5020    | 4176   | 4709   |
| vil1l             | 28020   | 25685   | 21878  | 22340  |
| nmnat1            | 2393    | 2365    | 1979   | 2649   |
| zgc-55420         | 61318   | 58074   | 56195  | 55684  |
| lta4h             | 7353    | 8154    | 5559   | 5398   |
| kdelc1            | 351     | 297     | 296    | 256    |
| hbbe2             | 14278   | 16751   | 14871  | 13346  |
| slc5a9            | 946     | 894     | 811    | 649    |
| klfd              | 172     | 193     | 158    | 143    |
| socs2             | 3699    | 3936    | 3372   | 4149   |
| atp1a1a.2         | 15367   | 14352   | 11192  | 10035  |
| c6ast3            | 7811    | 7546    | 6282   | 7022   |
| ctrl              | 331510  | 375347  | 281792 | 314191 |
| hbbe1.1           | 8229    | 12083   | 11791  | 9058   |
| dio2              | 226     | 258     | 233    | 154    |
| pts               | 4897    | 5534    | 5917   | 5930   |
| crygm1            | 275     | 238     | 146    | 183    |
| cyp3c4            | 944     | 1002    | 706    | 741    |
| nus1              | 1991    | 1978    | 1512   | 1636   |
| cpeb4             | 5120    | 5176    | 3616   | 3744   |
| si-ch73-252g14.4  | 3758    | 5065    | 3712   | 3654   |
| MGC173646         | 1547    | 2415    | 2096   | 1783   |
| si-dkey-52k20.7   | 87450   | 96261   | 62299  | 76818  |
| si-ch211-133l5.7  | 3280    | 3310    | 2426   | 2534   |
| zgc-114201        | 6704    | 6944    | 6010   | 5768   |
| sardh             | 4356    | 3935    | 3113   | 3321   |
| bfb               | 933     | 758     | 485    | 682    |
| acsl5             | 16495   | 16964   | 11917  | 12830  |
| socs8             | 1328    | 1398    | 1188   | 1413   |
| zgc-153896        | 1048    | 1127    | 818    | 854    |
| zgc-162132        | 39998   | 41613   | 44263  | 33567  |
| agxta             | 7178    | 6595    | 4421   | 5057   |
| itgb1b.2          | 3394    | 3557    | 3008   | 3489   |
| zgc-153920        | 57      | 24      | 37     | 27     |
| inhbb             | 1784    | 1820    | 1762   | 2022   |
| tat               | 48637   | 39214   | 33538  | 39951  |
| chchd2            | 7901    | 8298    | 7037   | 7381   |
| ms4a17a.17        | 1438    | 1064    | 1133   | 1131   |
| si-ch211-260g14.8 | 509     | 590     | 406    | 427    |
| cebpb             | 9129    | 12552   | 27074  | 39076  |
| zgc-77778         | 1821    | 1434    | 1152   | 1311   |

|                   |         |         |        |         |
|-------------------|---------|---------|--------|---------|
| upp2              | 4126    | 4072    | 2927   | 3594    |
| si-dkey-25e12.3   | 101     | 114     | 100    | 87      |
| col10a1           | 3973    | 4697    | 6012   | 5574    |
| tmx3              | 1329    | 1378    | 985    | 981     |
| hk2               | 1847    | 1930    | 1522   | 1809    |
| hsd11b3a          | 2138    | 2445    | 1738   | 1961    |
| wee1              | 915     | 1000    | 767    | 955     |
| zgc-103580        | 66      | 46      | 56     | 56      |
| ctrb1             | 1054649 | 1102788 | 884909 | 1020468 |
| si-dkey-69o16.5   | 6129    | 5038    | 4135   | 3750    |
| zgc-63938         | 28459   | 21579   | 19371  | 16614   |
| si-ch211-262h13.5 | 2199    | 1988    | 1414   | 1485    |
| abcg2a            | 40292   | 36360   | 25014  | 28266   |
| zgc-162301        | 1792    | 2064    | 1543   | 1937    |
| si-dkey-119m7.4   | 3493    | 3311    | 3218   | 3204    |
| zgc-113317        | 46      | 48      | 19     | 13      |
| si-ch211-12e13.7  | 363     | 173     | 100    | 113     |
| ppp4cb            | 3727    | 4042    | 3124   | 2779    |
| abcg8             | 2027    | 2074    | 1330   | 1463    |
| arl3l1            | 2039    | 2011    | 1138   | 1184    |
| dhrs3a            | 2444    | 2151    | 1679   | 1940    |
| zgc-56429         | 3589    | 3636    | 2998   | 3124    |
| stk24a            | 1233    | 1281    | 919    | 1023    |
| urod              | 877     | 923     | 645    | 725     |
| si-ch211-244h7.6  | 974     | 874     | 687    | 570     |
| gstt1b            | 1709    | 1411    | 1350   | 1280    |
| zgc-174888        | 1145    | 1100    | 827    | 911     |
| phyh              | 4799    | 4945    | 3571   | 3601    |
| zgc-162969        | 103     | 92      | 30     | 60      |
| si-ch211-140f21.1 | 8902    | 9359    | 6258   | 7393    |
| zgc-165473        | 820     | 823     | 825    | 753     |
| akr1a1a           | 326     | 277     | 234    | 217     |
| shbg              | 2430    | 2380    | 1821   | 1994    |
| proc              | 1822    | 1596    | 1313   | 1525    |
| zgc-56407         | 649     | 752     | 528    | 596     |
| LOC100003209      | 4299    | 3647    | 3348   | 4119    |
| anxa2b            | 2320    | 2328    | 1793   | 2006    |
| zgc-153846        | 2930    | 2619    | 1251   | 2004    |
| zgc-92380         | 9839    | 10287   | 9077   | 9942    |
| prmt5             | 2684    | 3134    | 2099   | 2548    |
| rybpa             | 3611    | 3793    | 2819   | 2974    |
| si-dkey-57a22.9   | 199     | 200     | 176    | 249     |
| arl3l2            | 1571    | 1659    | 1362   | 1290    |
| sst1.1            | 3233    | 3183    | 2639   | 2898    |
| bokb              | 527     | 520     | 430    | 451     |
| atad3b            | 10361   | 11308   | 9439   | 11690   |
| zgc-171226        | 210     | 148     | 136    | 97      |
| zgc-136820        | 3523    | 3688    | 2781   | 2889    |
| si-ch211-286m4.4  | 16045   | 16984   | 12433  | 13380   |
| riok3             | 7907    | 7752    | 5450   | 6043    |
| neu3.3            | 1098    | 904     | 607    | 710     |
| zgc-162126        | 10397   | 10519   | 9339   | 10792   |

|                  |       |       |       |       |
|------------------|-------|-------|-------|-------|
| cahz             | 3083  | 3473  | 2850  | 2841  |
| cyp2x8           | 1480  | 1567  | 865   | 854   |
| slc16a12b        | 8653  | 8495  | 6054  | 7812  |
| actl6b           | 357   | 330   | 293   | 332   |
| acsf2            | 3402  | 3410  | 3145  | 3329  |
| dnajc21          | 815   | 896   | 703   | 735   |
| socs1            | 2151  | 1543  | 1155  | 1757  |
| hspa9            | 25334 | 26668 | 18549 | 21436 |
| ambpl            | 14633 | 14361 | 11585 | 12219 |
| mcm6p            | 2711  | 2997  | 2210  | 2230  |
| zgc-101050       | 3811  | 3699  | 2549  | 2680  |
| dpagt1           | 1463  | 1350  | 1100  | 1237  |
| crygn1           | 3941  | 3684  | 2286  | 2764  |
| zgc-161973       | 1137  | 1159  | 741   | 803   |
| itpk1            | 7220  | 7238  | 5564  | 6174  |
| zgc-56518        | 4788  | 4443  | 3763  | 3501  |
| rcv1             | 27913 | 24545 | 16225 | 17468 |
| rab13            | 427   | 437   | 326   | 340   |
| igfbp2b          | 976   | 1188  | 890   | 952   |
| zgc-136545       | 2801  | 2918  | 2370  | 2328  |
| tectb            | 199   | 143   | 241   | 152   |
| LOC567396        | 431   | 376   | 343   | 473   |
| slc6a6           | 13584 | 13520 | 8942  | 10572 |
| mogat2           | 3716  | 3475  | 2600  | 2545  |
| sars             | 11743 | 12858 | 8535  | 9258  |
| dap1b            | 4621  | 4083  | 3410  | 3505  |
| hsd17b4          | 23632 | 23589 | 19878 | 20664 |
| mcm4             | 7911  | 8869  | 6684  | 6571  |
| zgc-172158       | 929   | 999   | 700   | 648   |
| pkhd111          | 8741  | 6954  | 5865  | 5927  |
| sst2             | 473   | 424   | 379   | 432   |
| zgc-123207       | 1017  | 975   | 759   | 974   |
| zgc-103585       | 1298  | 1170  | 968   | 1061  |
| LOC100006793     | 1703  | 1960  | 1360  | 1551  |
| f7               | 4203  | 4205  | 3817  | 3377  |
| col8a1a          | 2049  | 1936  | 1997  | 1887  |
| aca1             | 2206  | 2418  | 2010  | 1962  |
| drd4b            | 568   | 635   | 447   | 477   |
| apoa4            | 43823 | 47367 | 35144 | 36667 |
| zgc-136353       | 1405  | 1479  | 1081  | 1170  |
| aldoa            | 2642  | 2803  | 1818  | 1706  |
| wnt9b            | 574   | 704   | 676   | 802   |
| zgc-175280       | 8618  | 9024  | 6852  | 8107  |
| gadd45ba         | 30205 | 20659 | 24909 | 28799 |
| mmp30            | 11163 | 11011 | 8733  | 8676  |
| lox              | 954   | 938   | 768   | 874   |
| hmga1a           | 40425 | 43947 | 38769 | 38443 |
| si-ch211-244h7.5 | 551   | 446   | 292   | 287   |
| LOC100007703     | 56    | 81    | 38    | 38    |
| si-dkey-25o1.2   | 1787  | 1814  | 1586  | 1747  |
| sc5dl            | 257   | 229   | 245   | 239   |
| vegfaa           | 534   | 554   | 402   | 483   |

|                  |        |        |        |        |
|------------------|--------|--------|--------|--------|
| hspb1            | 1875   | 1811   | 1407   | 1426   |
| zgc-153036       | 2427   | 2289   | 1933   | 1970   |
| pdzd3b           | 536    | 607    | 694    | 666    |
| gamt             | 108635 | 115099 | 86462  | 86260  |
| aldoab           | 189053 | 193822 | 144702 | 136240 |
| zgc-86706        | 7726   | 8219   | 5568   | 6388   |
| cd276            | 1050   | 1030   | 1013   | 1019   |
| zgc-92712        | 619    | 644    | 485    | 473    |
| pkm2b            | 107300 | 120234 | 97768  | 77114  |
| amt              | 2766   | 2779   | 2332   | 2349   |
| bcmo1            | 4048   | 4371   | 2941   | 2814   |
| sec31a           | 7467   | 8294   | 6058   | 7276   |
| ptgds            | 33457  | 31614  | 20147  | 25717  |
| zgc-56292        | 443    | 482    | 480    | 435    |
| dync1li2         | 2185   | 2372   | 1715   | 1756   |
| ugt5a2           | 284    | 329    | 237    | 198    |
| lox11            | 3334   | 3729   | 3043   | 3709   |
| thns12           | 1096   | 1094   | 793    | 917    |
| chaf1a           | 2784   | 3127   | 2524   | 2426   |
| irf9             | 663    | 742    | 676    | 667    |
| pdap1            | 2651   | 2614   | 2162   | 2486   |
| si-dkey-190g11.3 | 321    | 272    | 237    | 261    |
| gbp              | 11101  | 9834   | 9623   | 10638  |
| krt5             | 785182 | 738026 | 696508 | 645929 |
| ugt5a3           | 305    | 328    | 217    | 215    |
| ces2             | 35207  | 34990  | 26603  | 27530  |
| mcm5             | 3030   | 3626   | 2920   | 2857   |
| fkbp9            | 876    | 1141   | 840    | 920    |
| iclp1            | 536    | 471    | 486    | 297    |
| farsb            | 10064  | 10462  | 7623   | 9248   |
| atp2a2b          | 14904  | 16298  | 11198  | 12032  |
| hbegfa           | 783    | 1040   | 1462   | 2305   |
| zgc-110447       | 300    | 347    | 241    | 273    |
| zgc-92040        | 1547   | 1463   | 1223   | 1333   |
| rbb4             | 3239   | 3855   | 2935   | 2716   |
| slc5a1           | 20311  | 20775  | 14671  | 16847  |
| hsp90b1          | 12067  | 13103  | 9966   | 10412  |
| cav2             | 2661   | 2254   | 1952   | 2113   |
| pmm2             | 254    | 292    | 210    | 168    |
| sgpl1            | 30379  | 30798  | 22145  | 24349  |
| rtn4rl2b         | 3494   | 3346   | 2430   | 2429   |
| slc5a5           | 407    | 433    | 360    | 395    |
| fstl1a           | 1183   | 1142   | 850    | 924    |
| slc39a3          | 2092   | 1988   | 1960   | 2130   |
| exosc2           | 1475   | 1796   | 1234   | 1409   |
| angptl7          | 2976   | 2666   | 2376   | 2322   |
| moxd1            | 363    | 234    | 228    | 266    |
| ephx1            | 2817   | 2512   | 1816   | 1927   |
| zgc-55259        | 1586   | 1689   | 1329   | 1365   |
| pgm1             | 17717  | 18522  | 13969  | 13632  |
| nme4             | 1230   | 1220   | 893    | 790    |
| prhoxnb          | 240    | 213    | 216    | 166    |

|                  |        |        |        |        |
|------------------|--------|--------|--------|--------|
| zgc-175221       | 5648   | 6189   | 3796   | 3852   |
| crabp2b          | 1394   | 1604   | 1200   | 1586   |
| LOC559803        | 4063   | 3578   | 2831   | 3026   |
| pfkfb3           | 14160  | 15900  | 11230  | 9840   |
| vsg1             | 4339   | 3996   | 3414   | 4096   |
| tbx21            | 3924   | 4131   | 2379   | 3005   |
| zgc-198195       | 1326   | 1439   | 1057   | 1272   |
| slc2a10          | 184    | 241    | 157    | 255    |
| zgc-101129       | 1085   | 976    | 753    | 575    |
| zgc-92005        | 1360   | 1545   | 1252   | 1136   |
| grwd1            | 3931   | 4298   | 2982   | 3512   |
| hbae3            | 24391  | 34549  | 29222  | 23592  |
| sec13            | 5305   | 5933   | 4173   | 4922   |
| matn1            | 7775   | 8470   | 10298  | 10581  |
| epha2            | 2256   | 2353   | 2222   | 2539   |
| fbxo8            | 7079   | 6731   | 4904   | 5810   |
| zgc-92479        | 22800  | 21220  | 19460  | 20358  |
| mcm2             | 3936   | 4595   | 3567   | 3657   |
| tmprss13a        | 1557   | 1583   | 1225   | 1384   |
| sid4             | 14532  | 14430  | 11640  | 12118  |
| mars             | 15340  | 16319  | 12839  | 15297  |
| ssb              | 4071   | 4248   | 2913   | 3235   |
| cfb              | 6160   | 7097   | 5017   | 4736   |
| zgc-92903        | 2050   | 1993   | 1655   | 1731   |
| crygm2b          | 738    | 564    | 395    | 500    |
| kdr              | 2589   | 2430   | 1856   | 2260   |
| rars             | 8774   | 9276   | 6244   | 7497   |
| atp1b2b          | 6801   | 6740   | 4838   | 5396   |
| lim2.1           | 5454   | 5427   | 3932   | 4815   |
| ugt5e1           | 539    | 461    | 441    | 456    |
| six6b            | 2942   | 3414   | 3329   | 3447   |
| zgc-113183       | 787    | 891    | 527    | 546    |
| si-dkey-91f15.1  | 484    | 482    | 472    | 679    |
| cldn15la         | 5277   | 5100   | 4277   | 4644   |
| f2rl1.2          | 567    | 631    | 888    | 1168   |
| c6ast4           | 91614  | 104125 | 81153  | 90621  |
| tnfb             | 90     | 104    | 77     | 113    |
| ddx5             | 47944  | 52951  | 36234  | 41349  |
| g6pca            | 3045   | 2683   | 2028   | 2139   |
| si-ch211-89f7.1  | 1723   | 1790   | 1525   | 1764   |
| c9               | 8052   | 7540   | 6035   | 5720   |
| elovl4b          | 3126   | 3131   | 2588   | 2566   |
| sult1st3         | 1870   | 1723   | 1161   | 1013   |
| gch2             | 5584   | 7096   | 6332   | 5673   |
| rho              | 403966 | 407542 | 376483 | 323232 |
| zgc-100919       | 11241  | 11782  | 9705   | 10726  |
| ipo9             | 4741   | 5202   | 3590   | 4002   |
| si-dkeyp-95d10.1 | 3432   | 3276   | 3209   | 3334   |
| si-dkey-31f5.1   | 4467   | 4556   | 3591   | 3971   |
| ckmt1            | 20619  | 19871  | 16186  | 15401  |
| dhrs9            | 6158   | 6407   | 4848   | 5160   |
| ddc              | 3091   | 3665   | 2601   | 2839   |

|                  |        |        |        |        |
|------------------|--------|--------|--------|--------|
| zgc-194158       | 531    | 562    | 642    | 477    |
| idh1             | 19271  | 16909  | 15650  | 17291  |
| LOC792509        | 7853   | 7558   | 5390   | 6255   |
| gpcpd1           | 11049  | 10727  | 6799   | 7148   |
| foxq1            | 2990   | 3111   | 2796   | 3491   |
| si-ch211-154o6.6 | 1072   | 1032   | 981    | 796    |
| zgc-153024       | 1811   | 1913   | 1635   | 1675   |
| farsa            | 14551  | 15149  | 11885  | 14027  |
| aldh6a1          | 112549 | 106258 | 80579  | 89409  |
| zgc-153115       | 941    | 1038   | 942    | 796    |
| arrdc3b          | 24950  | 24574  | 21168  | 22908  |
| snx10a           | 454    | 317    | 209    | 313    |
| dhtkd1           | 31043  | 31970  | 25034  | 27915  |
| zgc-92869        | 6734   | 5895   | 4932   | 5711   |
| LOC798075        | 901    | 891    | 639    | 586    |
| npvf             | 1044   | 840    | 799    | 575    |
| slc2a9l1         | 79     | 46     | 65     | 64     |
| si-dkey-21e7.2   | 6315   | 6136   | 4288   | 5004   |
| mknk2a           | 8147   | 8214   | 5830   | 5676   |
| rrh              | 1559   | 1612   | 1200   | 1291   |
| tmem41ab         | 3653   | 3921   | 2979   | 3108   |
| pdip5            | 2749   | 3262   | 2521   | 2565   |
| dpp4             | 6728   | 6395   | 4884   | 5459   |
| c11orf67         | 1566   | 1437   | 1022   | 1124   |
| qars             | 2676   | 2605   | 1723   | 2359   |
| crtac1           | 5257   | 4885   | 3570   | 3302   |
| si-ch211-203l9.3 | 3823   | 4961   | 2744   | 3449   |
| mettl7a          | 955    | 931    | 784    | 840    |
| fabp11a          | 638    | 745    | 751    | 899    |
| foxe3            | 156    | 232    | 161    | 193    |
| zgc-92511        | 3084   | 3052   | 2719   | 2819   |
| hgd              | 27238  | 24496  | 18764  | 21736  |
| si-dkeyp-113d7.4 | 172359 | 176315 | 149764 | 106886 |
| rcc1             | 969    | 996    | 727    | 848    |
| atp1a1a.3        | 11163  | 10558  | 7876   | 7732   |
| dao.2            | 2467   | 2441   | 1856   | 1940   |
| acat1            | 24221  | 22803  | 17413  | 18487  |
| cryba1a          | 4090   | 4365   | 3080   | 3500   |
| cyp2p9           | 1242   | 1462   | 974    | 1274   |
| zgc-113208       | 4597   | 4796   | 3378   | 4121   |
| tmem56b          | 6667   | 7358   | 5621   | 5775   |
| adm2             | 783    | 470    | 545    | 619    |
| LOC797250        | 9074   | 9253   | 6448   | 7124   |
| nrgnb            | 2841   | 2827   | 2105   | 2374   |
| si-ch211-199m3.9 | 6336   | 6306   | 5171   | 5585   |
| rrm2             | 891    | 948    | 829    | 548    |
| ptgs2a           | 2081   | 2138   | 3842   | 5829   |
| lim2.3           | 8645   | 8878   | 7150   | 8251   |
| copb1            | 17612  | 18216  | 13125  | 13790  |
| zgc-153788       | 1318   | 1291   | 829    | 1148   |
| slc25a20         | 9702   | 9786   | 8539   | 8305   |
| foxj1a           | 891    | 922    | 677    | 645    |

|                  |        |        |        |        |
|------------------|--------|--------|--------|--------|
| acad11           | 1734   | 1845   | 1640   | 1463   |
| smc2             | 1347   | 1629   | 1334   | 1216   |
| si-dkeyp-113d7.7 | 287245 | 253204 | 195836 | 189166 |
| cry5             | 6420   | 6737   | 4187   | 4897   |
| slc15a2          | 3810   | 3602   | 2777   | 3533   |
| aacs             | 2751   | 2933   | 1916   | 2062   |
| ubtd1            | 3271   | 3695   | 2855   | 3665   |
| nbl1             | 3420   | 3132   | 3451   | 3208   |
| sult2st1         | 1224   | 1364   | 851    | 798    |
| scamp4           | 652    | 774    | 661    | 781    |
| zgc-73230        | 5577   | 5642   | 4322   | 4375   |
| anp32b           | 6918   | 7578   | 5225   | 5711   |
| c3c              | 14305  | 15471  | 11217  | 12467  |
| EIF2AK3          | 5205   | 5289   | 4291   | 5173   |
| nme2a            | 1517   | 1318   | 855    | 823    |
| aca2             | 8741   | 8928   | 8099   | 8262   |
| kcnc3a           | 9147   | 10410  | 6423   | 6204   |
| ezh1             | 7110   | 6632   | 4423   | 5065   |
| slc6a5           | 1936   | 2270   | 1266   | 1169   |
| abcf1            | 12921  | 14196  | 9563   | 12707  |
| gpr39            | 16557  | 15357  | 15242  | 16625  |
| zgc-153440       | 8083   | 7828   | 5946   | 6268   |
| hsp90a.1         | 7370   | 8968   | 7742   | 7841   |
| lgals2b          | 60631  | 59825  | 35458  | 32984  |
| kars             | 34169  | 35267  | 23978  | 27883  |
| kpna2            | 1121   | 1146   | 1055   | 930    |
| rbfox1l          | 14820  | 15212  | 12563  | 13226  |
| zgc-153997       | 20795  | 20940  | 21393  | 21673  |
| mycl1b           | 5536   | 5891   | 4759   | 5425   |
| abcg5            | 1908   | 2091   | 1315   | 1720   |
| stam             | 6754   | 7021   | 5156   | 5879   |
| ptges            | 385    | 343    | 324    | 416    |
| zgc-113054       | 2129   | 2245   | 1946   | 1900   |
| zgc-66125        | 1262   | 1357   | 1303   | 993    |
| smc4             | 2225   | 2521   | 2575   | 1958   |
| baxa             | 2912   | 3122   | 2531   | 2718   |
| serpina1l        | 33852  | 30287  | 23386  | 27201  |
| zgc-92113        | 8132   | 7470   | 5998   | 5693   |
| cdk2ap2          | 1556   | 1678   | 1328   | 1502   |
| si-dkey-239i20.2 | 1156   | 1244   | 938    | 967    |
| si-dkey-19f23.2  | 695    | 796    | 486    | 386    |
| kmo              | 2987   | 2855   | 1969   | 2447   |
| zgc-65781        | 8273   | 8427   | 7997   | 8621   |
| zgc-63505        | 1024   | 1066   | 716    | 807    |
| phb              | 15249  | 16961  | 11355  | 12530  |
| ada              | 38250  | 38043  | 26718  | 28547  |
| krt18            | 54625  | 52138  | 40350  | 48974  |
| EIF2AK1          | 2240   | 2355   | 1586   | 1799   |
| irf3             | 286    | 258    | 196    | 207    |
| zgc-136872       | 1460   | 1220   | 1064   | 1094   |
| zgc-77650        | 2023   | 2093   | 1512   | 1654   |
| serpinb1l3       | 29852  | 30658  | 24994  | 25530  |

|                  |        |        |        |        |
|------------------|--------|--------|--------|--------|
| zgc-103681       | 523    | 555    | 467    | 455    |
| dnmt4            | 1721   | 2003   | 1518   | 1621   |
| dnajb11          | 1246   | 1349   | 1033   | 1165   |
| foxc1b           | 1533   | 1536   | 1903   | 2253   |
| pgp              | 2965   | 2923   | 2187   | 1904   |
| zgc-86586        | 226    | 224    | 186    | 222    |
| bhmt             | 290997 | 277771 | 253459 | 262109 |
| tmem86b          | 4908   | 4976   | 4318   | 4713   |
| opn1lw1          | 152    | 111    | 155    | 135    |
| psme3            | 2618   | 2747   | 1885   | 2013   |
| cd74             | 310    | 301    | 215    | 180    |
| zgc-63663        | 92183  | 96343  | 64644  | 69378  |
| decr1            | 1402   | 1529   | 1361   | 1300   |
| gsdf             | 297    | 249    | 256    | 262    |
| sepp1a           | 191712 | 181692 | 149086 | 152280 |
| bnip3            | 4478   | 4029   | 2800   | 3320   |
| stap2b           | 704    | 674    | 608    | 592    |
| actn1            | 5928   | 5868   | 5371   | 5109   |
| hs3st3b1a        | 1470   | 1157   | 681    | 915    |
| wu-fb12e11       | 4572   | 4357   | 3661   | 4244   |
| ace2             | 42232  | 44602  | 34308  | 37204  |
| ahr1b            | 3639   | 4696   | 3242   | 3663   |
| akr1b1           | 9297   | 9631   | 7169   | 7366   |
| tmem54           | 270    | 273    | 162    | 195    |
| zgc-136902       | 1848   | 2203   | 1968   | 1972   |
| sec22ba          | 853    | 846    | 686    | 798    |
| slc16a9a         | 12268  | 12325  | 9441   | 9096   |
| zgc-64043        | 6359   | 6443   | 4791   | 5433   |
| kdelr2           | 4202   | 4469   | 3433   | 3665   |
| dolpp1           | 1587   | 1967   | 1390   | 1411   |
| zgc-100933       | 5382   | 5427   | 3778   | 4323   |
| gcat             | 6825   | 6820   | 5533   | 5927   |
| anxa1c           | 17576  | 15226  | 11840  | 13209  |
| zgc-91957        | 3352   | 3854   | 3024   | 2658   |
| gadd45g          | 6747   | 5896   | 4369   | 4564   |
| slc25a47a        | 6441   | 6914   | 5228   | 6355   |
| gngt1            | 4859   | 4628   | 3856   | 3032   |
| sox4a            | 38444  | 36957  | 29937  | 30381  |
| zgc-194626       | 50     | 65     | 47     | 28     |
| slc23a1          | 1063   | 1196   | 880    | 1040   |
| si-ch211-102c2.6 | 6261   | 5612   | 4672   | 4845   |
| calub            | 613    | 652    | 531    | 569    |
| cryba2b          | 136856 | 133729 | 97904  | 103258 |
| foxo1b           | 785    | 1004   | 609    | 638    |
| zgc-101030       | 759    | 813    | 618    | 668    |
| cebpq            | 11192  | 10782  | 9158   | 9973   |
| scn4ba           | 2564   | 2997   | 1570   | 1681   |
| zgc-174908       | 2868   | 2563   | 2016   | 1972   |
| exosc6           | 980    | 1099   | 948    | 1023   |
| LOC796447        | 11128  | 9629   | 7827   | 7550   |
| cnn2             | 5011   | 5570   | 4762   | 4894   |
| si-ch211-244h7.4 | 473    | 413    | 302    | 273    |



|                  |       |       |       |       |
|------------------|-------|-------|-------|-------|
| pnp5b            | 3025  | 3172  | 2469  | 2147  |
| nr0b1            | 1568  | 1208  | 1103  | 932   |
| ssrp1a           | 2165  | 2248  | 1484  | 1660  |
| ddt              | 3899  | 4100  | 3139  | 3595  |
| epd              | 20677 | 16999 | 12634 | 13526 |
| ifnphi1          | 9     | 4     | 4     | 14    |
| ifrd2            | 4063  | 4804  | 3355  | 3947  |
| zgc-101897       | 4237  | 3774  | 2996  | 3396  |
| tmem49           | 2288  | 2506  | 1885  | 2085  |
| tnni2a.1         | 9157  | 8213  | 6211  | 7341  |
| si-dkeyp-94b4.2  | 368   | 411   | 373   | 364   |
| zgc-172086       | 1965  | 2028  | 1515  | 1277  |
| zgc-136871       | 2096  | 2203  | 1490  | 1627  |
| adam8a           | 278   | 380   | 271   | 393   |
| vtnb             | 4645  | 4443  | 3494  | 3519  |
| ghrb             | 15345 | 15066 | 10057 | 12352 |
| p4ha1            | 564   | 538   | 442   | 495   |
| rgs9             | 3582  | 3566  | 3190  | 3577  |
| si-dkey-205h13.1 | 10155 | 9172  | 5528  | 7187  |
| opn4l            | 4456  | 4463  | 3083  | 3572  |
| dnajc2           | 1707  | 1882  | 1288  | 1514  |
| sag              | 8762  | 9049  | 6332  | 6116  |
| acvrl1           | 2878  | 2729  | 2331  | 2729  |
| cx23             | 1134  | 1412  | 1034  | 1162  |
| uck2a            | 1718  | 1842  | 1454  | 1608  |
| plxnd1           | 3365  | 2954  | 2806  | 3417  |
| chpt1            | 15339 | 16287 | 13208 | 13900 |
| fam63a           | 6021  | 5821  | 4605  | 4833  |
| ntla             | 1607  | 1414  | 1372  | 1236  |
| EIF4E1C          | 2029  | 2408  | 1544  | 1706  |
| slc2a3           | 8793  | 9461  | 6178  | 6414  |
| cyp2aa2          | 260   | 243   | 211   | 236   |
| myoz2a           | 9258  | 9587  | 7306  | 7117  |
| si-ch211-117n7.7 | 615   | 545   | 556   | 480   |
| bcat2            | 13318 | 13772 | 9694  | 11650 |
| ahsa1l           | 1523  | 1539  | 1127  | 1366  |
| fgg              | 19622 | 20763 | 15080 | 17466 |
| zgc-153038       | 972   | 825   | 558   | 696   |
| zgc-112374       | 848   | 782   | 665   | 608   |
| zgc-110294       | 1023  | 905   | 783   | 1045  |
| wu-fi40b08       | 469   | 565   | 436   | 504   |
| gfer             | 1148  | 1161  | 939   | 1076  |
| myoz1b           | 26134 | 26049 | 19197 | 19518 |
| zgc-56533        | 1868  | 1800  | 1507  | 1648  |
| ifi30            | 3095  | 2785  | 2680  | 2694  |
| adss             | 8124  | 8957  | 5860  | 6134  |
| zgc-136850       | 819   | 915   | 628   | 649   |
| zgc-153031       | 1317  | 1384  | 1059  | 1033  |
| pbp              | 4736  | 5012  | 3382  | 3512  |
| zgc-123218       | 274   | 240   | 271   | 269   |
| zgc-136860       | 2592  | 2767  | 2094  | 2256  |
| znfl2a           | 552   | 505   | 414   | 457   |

|                   |        |        |        |        |
|-------------------|--------|--------|--------|--------|
| msna              | 8269   | 8389   | 6686   | 7633   |
| lim2.4            | 35412  | 35073  | 27413  | 30295  |
| smyd5             | 872    | 971    | 672    | 640    |
| exorh             | 1281   | 1392   | 1182   | 1205   |
| crygmx1           | 132    | 167    | 103    | 133    |
| suz12a            | 1323   | 1521   | 930    | 1274   |
| pm20d1.2          | 2660   | 3125   | 2152   | 2194   |
| slc26a6l          | 577    | 487    | 440    | 583    |
| si-ch211-212m21.5 | 4330   | 4437   | 3808   | 4330   |
| arf1              | 4653   | 4869   | 3890   | 4059   |
| plek2             | 669    | 726    | 729    | 478    |
| acta2             | 37910  | 33600  | 28556  | 30617  |
| dhrs11b           | 1534   | 1666   | 1156   | 1361   |
| cpt1b             | 2951   | 3116   | 2031   | 1878   |
| socs3a            | 11061  | 12690  | 18266  | 27621  |
| aldh4a1           | 13242  | 14407  | 10491  | 11887  |
| capn3             | 56965  | 56379  | 39337  | 45987  |
| zgc-111821        | 936    | 854    | 1127   | 1364   |
| cryba1l           | 391859 | 386209 | 288374 | 325030 |
| serpinc1          | 14484  | 15034  | 9200   | 10142  |
| cpa4              | 35112  | 40033  | 33958  | 35587  |
| sult1st6          | 959    | 900    | 739    | 773    |
| abcg2b            | 808    | 821    | 557    | 810    |
| rrp9              | 2906   | 2970   | 2027   | 2400   |
| tyms              | 355    | 419    | 342    | 327    |
| cyb5r2            | 866    | 899    | 773    | 811    |
| zgc-152945        | 1851   | 1687   | 1077   | 1152   |
| msh6              | 3508   | 3716   | 2653   | 2943   |
| mllt11            | 16411  | 18383  | 12282  | 12974  |
| elov17b           | 1450   | 2259   | 3961   | 4993   |
| agt               | 8486   | 7782   | 5517   | 5565   |
| alg2              | 925    | 931    | 669    | 715    |
| ulk1a             | 8759   | 7972   | 5617   | 6260   |
| trib3             | 15730  | 14760  | 11870  | 13573  |
| zgc-172059        | 2824   | 3033   | 2250   | 2466   |
| pltp              | 7750   | 7212   | 4300   | 5580   |
| jak1              | 9893   | 10396  | 7741   | 8627   |
| sst3              | 3462   | 3424   | 2570   | 2803   |
| copa              | 29692  | 30569  | 22226  | 23285  |
| si-ch211-200o3.4  | 4916   | 4707   | 3690   | 4052   |
| igfbp6b           | 1306   | 1191   | 1084   | 906    |
| LOC100151110      | 10751  | 11134  | 8535   | 8949   |
| stab2             | 694    | 686    | 548    | 655    |
| ch25hl1.1         | 2079   | 2239   | 1645   | 2146   |
| cryba1b           | 364972 | 358991 | 248019 | 292728 |
| ppp2r2c           | 6437   | 6750   | 4403   | 4556   |
| slc15a1b          | 31840  | 30676  | 24961  | 24408  |
| irf7              | 547    | 503    | 502    | 414    |
| mafg2             | 1785   | 1903   | 1269   | 1136   |
| c8g               | 1095   | 1053   | 726    | 914    |
| dlx4a             | 1100   | 1184   | 983    | 1274   |
| f9                | 131    | 121    | 106    | 120    |

|                  |        |        |        |        |
|------------------|--------|--------|--------|--------|
| nrarpa           | 4144   | 4304   | 3827   | 4501   |
| si-dkey-19f23.3  | 3929   | 3937   | 3333   | 3493   |
| creld2           | 138    | 170    | 98     | 118    |
| dnaja1l          | 1039   | 1202   | 1177   | 1352   |
| zgc-172191       | 318    | 256    | 194    | 305    |
| cyp19a1b         | 323    | 366    | 181    | 228    |
| slc1a1           | 5613   | 5590   | 4239   | 4241   |
| noc4l            | 2296   | 2709   | 1952   | 2217   |
| agxt2            | 4613   | 4620   | 3451   | 3436   |
| abhd2b           | 1276   | 1476   | 971    | 938    |
| sod1             | 11492  | 10980  | 8163   | 9199   |
| rgs20            | 1811   | 2138   | 1253   | 1457   |
| scpp7            | 0      | 2      | 2      | 0      |
| zgc-73311        | 5353   | 5337   | 3913   | 4197   |
| si-ch211-51m24.3 | 9052   | 10336  | 7969   | 8976   |
| zgc-77439        | 20423  | 19184  | 15400  | 16637  |
| hps1             | 661    | 743    | 558    | 674    |
| rdh5             | 4319   | 4870   | 3897   | 3778   |
| tgm2             | 2859   | 2548   | 1960   | 2160   |
| gfpt1            | 2243   | 2337   | 1893   | 1907   |
| ptges3b          | 792    | 846    | 646    | 650    |
| zgc-113291       | 855    | 899    | 526    | 503    |
| f10              | 9467   | 9178   | 7392   | 8914   |
| fgf19            | 219    | 212    | 202    | 260    |
| sae1             | 846    | 936    | 751    | 757    |
| hars             | 14009  | 14691  | 10132  | 12377  |
| hspb8            | 2462   | 2564   | 1896   | 2215   |
| rgs5a            | 4663   | 4383   | 3772   | 4492   |
| dusp11           | 325    | 350    | 215    | 256    |
| LOC100004138     | 2      | 1      | 2      | 0      |
| zgc-66286        | 44181  | 43371  | 32018  | 33977  |
| zgc-103663       | 44495  | 45518  | 33316  | 36284  |
| cryba4           | 231658 | 228779 | 157977 | 174249 |
| rgn              | 2577   | 2445   | 1907   | 2266   |
| crygn2           | 319607 | 322705 | 265861 | 303835 |
| ckba             | 13596  | 12703  | 10113  | 9900   |
| kif11            | 1110   | 1180   | 1246   | 923    |
| zgc-158340       | 2418   | 2521   | 1764   | 2068   |
| lifrb            | 535    | 505    | 459    | 478    |
| tp53             | 2060   | 2131   | 1744   | 1862   |
| crygm3           | 228    | 219    | 139    | 136    |
| thop1            | 894    | 823    | 669    | 604    |
| cthl             | 917    | 625    | 629    | 865    |
| acadm            | 23626  | 22895  | 16828  | 18467  |
| etf1             | 19230  | 21831  | 15250  | 17300  |
| c1qtnf4          | 10317  | 10210  | 7211   | 7360   |
| zgc-154073       | 1793   | 1861   | 1148   | 1270   |
| grn2             | 1170   | 1360   | 1424   | 829    |
| zgc-165653       | 3166   | 3222   | 2400   | 2523   |
| zgc-55307        | 14696  | 14188  | 9366   | 10034  |
| tacc3            | 699    | 810    | 600    | 464    |
| zgc-101744       | 6388   | 6254   | 4819   | 4734   |

|                   |         |         |         |         |
|-------------------|---------|---------|---------|---------|
| nyx               | 1880    | 2284    | 1445    | 1726    |
| slc16a3           | 6015    | 6285    | 4426    | 4138    |
| txnipa            | 99925   | 94071   | 76032   | 69692   |
| gnat1             | 12703   | 13659   | 10129   | 8654    |
| igf2a             | 1598    | 1240    | 923     | 1013    |
| zgc-172053        | 67      | 52      | 230     | 77      |
| LOC559008         | 6458    | 7592    | 4057    | 4191    |
| slc25a29          | 6897    | 8496    | 5285    | 6024    |
| zgc-158845        | 29      | 16      | 18      | 6       |
| zgc-162977        | 2118    | 1898    | 1518    | 1505    |
| guk1              | 1865    | 1437    | 1111    | 1153    |
| zgc-112257        | 13973   | 13154   | 11580   | 11651   |
| zgc-195245        | 412     | 345     | 328     | 418     |
| mych              | 34192   | 30802   | 35151   | 36947   |
| lox12b            | 2701    | 2695    | 2201    | 2393    |
| arcn1             | 4128    | 4035    | 3125    | 3212    |
| samsn1b           | 2224    | 2843    | 2167    | 2493    |
| aqp4              | 776     | 1067    | 579     | 692     |
| si-ch211-214j8.1  | 7912    | 7520    | 5793    | 6394    |
| zgc-85866         | 5221    | 6508    | 9033    | 14421   |
| zgc-154041        | 4822    | 5450    | 3934    | 4250    |
| btbd10a           | 9194    | 9357    | 7168    | 7771    |
| dck               | 252     | 236     | 223     | 235     |
| si-ch211-122l24.4 | 4       | 11      | 20      | 27      |
| lrrc15            | 194     | 205     | 145     | 216     |
| npy               | 1430    | 1428    | 998     | 1005    |
| pvalb6            | 4627    | 4784    | 3249    | 3357    |
| zgc-123244        | 362     | 405     | 343     | 416     |
| LOC555692         | 2356    | 2964    | 2054    | 2734    |
| zgc-85644         | 2082    | 2047    | 1319    | 1680    |
| zgc-92744         | 21246   | 20442   | 14722   | 16155   |
| plekhh1           | 633     | 833     | 466     | 578     |
| atp2a1            | 2046828 | 2055447 | 1521291 | 1679082 |
| LOC565375         | 1484    | 1528    | 885     | 920     |
| zgc-153615        | 6333    | 6779    | 5265    | 5033    |
| pvalb1            | 1026868 | 1018639 | 681010  | 677845  |
| aurkb             | 873     | 911     | 802     | 757     |
| LOC570474         | 98      | 168     | 83      | 99      |
| ache              | 26920   | 28799   | 18744   | 18853   |
| ca15c             | 422     | 401     | 722     | 554     |
| mhc2dab           | 67      | 71      | 85      | 66      |
| copg2             | 19653   | 19860   | 14943   | 15959   |
| slco1f4           | 13      | 12      | 14      | 18      |
| zgc-153118        | 10      | 7       | 1       | 3       |
| pdzk1             | 36670   | 36756   | 30535   | 33054   |
| klf15             | 23248   | 21412   | 15698   | 17993   |
| zgc-56466         | 1782    | 2033    | 1723    | 1737    |
| itm2cb            | 8744    | 8837    | 6839    | 5878    |
| zgc-112407        | 1635    | 1610    | 1452    | 1599    |
| rhd               | 271     | 313     | 279     | 349     |
| tecrb             | 12152   | 12910   | 9606    | 9874    |
| abcc2             | 40415   | 38825   | 31865   | 33982   |

|                  |       |       |       |       |
|------------------|-------|-------|-------|-------|
| si-dkey-236e20.6 | 845   | 856   | 598   | 916   |
| zgc-110113       | 1236  | 1492  | 1269  | 1239  |
| zgc-86896        | 16791 | 16580 | 15549 | 14210 |
| lipc             | 791   | 826   | 579   | 824   |
| ms4a17a.16       | 270   | 249   | 213   | 290   |
| ldlr             | 14762 | 13730 | 10289 | 12286 |
| si-dkey-34f16.5  | 415   | 547   | 363   | 465   |
| rpp40l           | 614   | 694   | 461   | 527   |
| tnnt2d           | 10144 | 9833  | 8429  | 9156  |
| optn             | 3278  | 3005  | 2656  | 2500  |
| rx1              | 6162  | 5296  | 3501  | 3740  |
| fndc3ba          | 2763  | 2697  | 2383  | 2553  |
| clu              | 8785  | 8532  | 6383  | 6623  |
| rorca            | 11492 | 11637 | 9686  | 10884 |
| gfod2            | 3354  | 3172  | 2520  | 2471  |
| mafg1            | 334   | 428   | 262   | 271   |
| decr2            | 1734  | 1780  | 1319  | 1556  |
| gyg2             | 123   | 90    | 46    | 49    |
| si-rp71-1g18.10  | 325   | 338   | 234   | 226   |
| zgc-77052        | 13529 | 14832 | 11142 | 12118 |
| cdnf             | 1597  | 1499  | 1195  | 1150  |
| bms1l            | 8945  | 10131 | 7444  | 9172  |
| ccnb1            | 397   | 465   | 478   | 345   |
| zgc-101788       | 746   | 657   | 880   | 890   |
| acox3            | 2516  | 2585  | 1988  | 2066  |
| slc39a1          | 1133  | 1156  | 914   | 1002  |
| eif4a1a          | 26449 | 29555 | 20266 | 19866 |
| got2a            | 17188 | 18509 | 13894 | 15671 |
| rps8b            | 1408  | 1506  | 1157  | 1113  |
| pde6a            | 3432  | 3632  | 2637  | 2432  |
| agl              | 21007 | 20904 | 16445 | 16763 |
| tnfrsf9a         | 219   | 235   | 192   | 206   |
| zgc-77817        | 2397  | 2645  | 1966  | 2120  |
| zgc-172139       | 2170  | 2290  | 1605  | 1807  |
| zgc-154006       | 643   | 634   | 460   | 493   |
| klf13            | 4569  | 4099  | 2326  | 2443  |
| pi15a            | 88    | 140   | 87    | 113   |
| uts1             | 1393  | 1358  | 869   | 864   |
| galns            | 1070  | 1207  | 965   | 1028  |
| hdac9b           | 7568  | 8091  | 5794  | 6462  |
| crh              | 1040  | 973   | 771   | 834   |
| pcp4a            | 3823  | 3807  | 2905  | 2606  |
| itih2            | 14019 | 13896 | 9493  | 10714 |
| optc             | 51    | 16    | 31    | 10    |
| zgc-114085       | 471   | 465   | 325   | 307   |
| zgc-158846       | 36048 | 32341 | 24664 | 26371 |
| hhatlb           | 4259  | 4665  | 3189  | 3298  |
| fkbp11           | 3697  | 4102  | 3329  | 3519  |
| nfk2             | 3796  | 3890  | 3408  | 3299  |
| zgc-76871        | 5850  | 5820  | 4849  | 5367  |
| nat10            | 7193  | 7301  | 5094  | 6037  |
| snrpd1           | 2643  | 2771  | 2307  | 2089  |

|            |         |         |         |         |
|------------|---------|---------|---------|---------|
| ctgf       | 13527   | 13696   | 15095   | 18570   |
| znf395b    | 22351   | 22466   | 19679   | 21420   |
| agpat9l    | 2113    | 1872    | 1870    | 1825    |
| sult6b1    | 15116   | 15105   | 11201   | 11781   |
| ilvbl      | 4121    | 4265    | 3285    | 3125    |
| ckmb       | 1648839 | 1704456 | 1225641 | 1287443 |
| ext1c      | 10286   | 9506    | 7818    | 8546    |
| pold1      | 2088    | 2396    | 1845    | 1766    |
| pwp2h      | 3535    | 4079    | 2799    | 3312    |
| abca4a     | 985     | 1010    | 804     | 918     |
| il21r      | 112     | 118     | 124     | 144     |
| slc4a2b    | 5346    | 5678    | 4416    | 4751    |
| stat1b     | 96      | 95      | 86      | 85      |
| zgc-77906  | 3238    | 2565    | 2819    | 3130    |
| frem1a     | 3134    | 3341    | 2813    | 2963    |
| mos        | 170     | 173     | 106     | 156     |
| dgat2      | 10542   | 10282   | 7284    | 8103    |
| zgc-136817 | 8879    | 9016    | 6743    | 7553    |
| cyp2aa12   | 4358    | 4223    | 3109    | 3168    |
| ckma       | 1930718 | 1955628 | 1423840 | 1510129 |
| pglyrp2    | 292     | 361     | 287     | 265     |
| cplx4a     | 7101    | 6925    | 5454    | 6465    |
| slc5a2     | 1442    | 1288    | 1124    | 1254    |
| figf       | 369     | 355     | 296     | 264     |
| prmt6      | 454     | 489     | 359     | 343     |
| slc16a9b   | 7612    | 8589    | 7184    | 6950    |
| ip6k2      | 37899   | 32628   | 24254   | 24832   |
| cldn1      | 9596    | 10541   | 9498    | 9175    |
| mpdu1a     | 1106    | 988     | 889     | 792     |
| skp2       | 179     | 189     | 180     | 129     |
| tnfrsfa    | 2397    | 2265    | 1956    | 2126    |
| bop1       | 7844    | 8325    | 5807    | 7156    |
| khk        | 1427    | 1474    | 1337    | 1251    |
| scpp5      | 1706    | 1620    | 1526    | 1559    |
| ptger2b    | 163     | 200     | 156     | 143     |
| hspa14     | 4787    | 5136    | 3360    | 4042    |
| zgc-112176 | 14360   | 13936   | 12629   | 12370   |
| acads      | 2979    | 3094    | 2509    | 2257    |
| adh5       | 37203   | 35955   | 26748   | 29803   |
| klf2b      | 3943    | 4498    | 7679    | 10378   |
| esr2b      | 2328    | 2296    | 1477    | 1598    |
| dyrk2      | 7628    | 8967    | 5654    | 6889    |
| pfdn2      | 4427    | 4292    | 3266    | 3671    |
| chchd4     | 575     | 638     | 391     | 427     |
| atp1a1a.5  | 3408    | 3660    | 2642    | 2674    |
| bactin1    | 194538  | 191297  | 153330  | 129854  |
| rgs5b      | 523     | 647     | 565     | 392     |
| zgc-64076  | 11036   | 10765   | 8009    | 9326    |
| crb1       | 4234    | 4292    | 3111    | 3492    |
| phospho1   | 333     | 602     | 355     | 247     |
| fbl        | 10239   | 10813   | 7713    | 8650    |
| ahcy       | 196037  | 196601  | 144992  | 155588  |

|                  |        |        |        |        |
|------------------|--------|--------|--------|--------|
| cdk8             | 1246   | 1289   | 839    | 932    |
| si-dkey-42i9.5   | 1195   | 1393   | 971    | 1113   |
| cyp4t8           | 4507   | 4424   | 2933   | 3521   |
| pgrmc1           | 4038   | 3896   | 3138   | 3294   |
| zgc-153593       | 1317   | 952    | 1125   | 1030   |
| zgc-165507       | 5522   | 5291   | 4199   | 4271   |
| zgc-153343       | 10     | 11     | 14     | 11     |
| zgc-85963        | 41876  | 40596  | 31251  | 33982  |
| arid3a           | 3605   | 3895   | 3355   | 3494   |
| cmn              | 6752   | 6763   | 5635   | 5640   |
| zgc-77739        | 2387   | 2083   | 1665   | 1670   |
| zgc-154086       | 376    | 504    | 253    | 326    |
| zgc-103688       | 809    | 815    | 591    | 609    |
| klhl31           | 160812 | 155380 | 101744 | 124944 |
| zgc-158450       | 38060  | 41634  | 28840  | 35570  |
| zgc-85976        | 683    | 933    | 594    | 699    |
| obfc2aa          | 908    | 1133   | 781    | 767    |
| hspb11           | 3230   | 3571   | 2853   | 2973   |
| sp3              | 1272   | 1412   | 1361   | 1421   |
| zgc-162595       | 2141   | 2173   | 1349   | 1868   |
| lepr             | 4072   | 4134   | 2604   | 3009   |
| ccna2            | 624    | 683    | 607    | 433    |
| zgc-110298       | 9621   | 9261   | 7955   | 8462   |
| zgc-77556        | 1121   | 1050   | 828    | 833    |
| dlgap5           | 964    | 1048   | 1007   | 911    |
| ruvb1            | 2993   | 3203   | 2387   | 2600   |
| zgc-85869        | 1025   | 1185   | 928    | 909    |
| c6orf115         | 1037   | 1093   | 899    | 862    |
| uckl1            | 843    | 952    | 710    | 756    |
| zgc-55671        | 7806   | 7751   | 6310   | 6112   |
| ugdh             | 2126   | 2162   | 1979   | 1929   |
| si-dkey-170o10.3 | 535    | 530    | 379    | 476    |
| zgc-113828       | 313    | 378    | 271    | 225    |
| zgc-101768       | 2597   | 2924   | 1923   | 2286   |
| f2r              | 216    | 279    | 219    | 233    |
| zgc-153154       | 12562  | 11373  | 8030   | 9835   |
| capns1a          | 11961  | 11766  | 9687   | 9510   |
| adssl            | 5990   | 6407   | 4779   | 5192   |
| zgc-174259       | 278    | 334    | 232    | 203    |
| scn2b            | 5241   | 5887   | 3874   | 4080   |
| cldn5a           | 2574   | 2313   | 2049   | 2248   |
| cyp3c1l2         | 4091   | 3642   | 2272   | 2823   |
| hspe1            | 4123   | 4312   | 3342   | 3314   |
| zgc-86776        | 2290   | 2397   | 1734   | 1888   |
| crabp1a          | 1953   | 1929   | 1602   | 1696   |
| cx35             | 1481   | 1514   | 1294   | 1102   |
| fabp11b          | 104    | 144    | 117    | 100    |
| lect2l           | 1081   | 1178   | 1160   | 864    |
| gys1             | 51735  | 54539  | 39181  | 43559  |
| klf9             | 47654  | 45464  | 38439  | 40911  |
| epas1b           | 7849   | 8576   | 5522   | 7080   |
| ca7              | 317    | 243    | 188    | 199    |

|                  |        |        |        |        |
|------------------|--------|--------|--------|--------|
| zgc-171581       | 549    | 591    | 449    | 346    |
| gpd1             | 18081  | 16400  | 13740  | 14051  |
| mtus1a           | 2937   | 3110   | 2313   | 2662   |
| si-dkey-184p18.2 | 820    | 708    | 615    | 450    |
| ahr2             | 13240  | 12809  | 9273   | 12683  |
| srrt             | 4470   | 4691   | 3432   | 4131   |
| opr1             | 2647   | 2794   | 2018   | 2108   |
| wnt2bb           | 293    | 289    | 290    | 235    |
| ak4              | 6055   | 5932   | 4297   | 4864   |
| faah2a           | 2109   | 2026   | 1684   | 1750   |
| ncaph            | 491    | 475    | 415    | 309    |
| vamp1            | 6933   | 6876   | 5238   | 4758   |
| crif3            | 4986   | 4630   | 3830   | 4252   |
| pcna             | 9433   | 10628  | 8356   | 7798   |
| pdss1            | 2523   | 2928   | 2039   | 2013   |
| ing5a            | 4161   | 4081   | 3175   | 3617   |
| zgc-174904       | 3449   | 3890   | 2949   | 3791   |
| zgc-63767        | 1178   | 1372   | 849    | 1168   |
| msh2             | 2188   | 2419   | 1630   | 1590   |
| fads2            | 5962   | 5383   | 3451   | 3692   |
| zgc-195195       | 46     | 47     | 50     | 41     |
| eya2             | 4465   | 4064   | 3216   | 3737   |
| b3gnt7           | 1163   | 1264   | 1312   | 1176   |
| abi1a            | 3669   | 3605   | 3020   | 3111   |
| slc25a37         | 1030   | 1347   | 822    | 865    |
| si-ch211-237l4.6 | 1537   | 1360   | 1046   | 1104   |
| slc25a25b        | 635    | 630    | 429    | 303    |
| zgc-110784       | 562    | 505    | 423    | 504    |
| tuba8l           | 24792  | 27521  | 22197  | 20107  |
| si-rp71-1g18.11  | 174    | 160    | 119    | 137    |
| zgc-113625       | 19     | 10     | 27     | 35     |
| heatr1           | 8397   | 8163   | 5297   | 7529   |
| pdlim4           | 2412   | 2302   | 1797   | 2030   |
| imp4             | 1383   | 1453   | 949    | 1108   |
| irbp             | 88716  | 82874  | 59838  | 68980  |
| smtnl            | 4308   | 3603   | 2772   | 3107   |
| ncapg2           | 492    | 527    | 361    | 302    |
| syn2a            | 12691  | 13178  | 10146  | 10716  |
| nadl1.2          | 15291  | 15693  | 10698  | 11118  |
| slc16a8          | 4520   | 4620   | 3408   | 3822   |
| snrpe            | 1365   | 1401   | 1137   | 1124   |
| creb3l3l         | 14670  | 13990  | 11254  | 11482  |
| EIF4G2A          | 9093   | 10022  | 6581   | 6647   |
| zgc-114164       | 2660   | 2613   | 1786   | 1760   |
| zgc-153766       | 1132   | 990    | 834    | 846    |
| nola1            | 5331   | 5912   | 4370   | 5036   |
| vdra             | 4234   | 5735   | 3163   | 4040   |
| fxyd6            | 3378   | 3485   | 2259   | 2584   |
| crybb1l2         | 503485 | 486078 | 383714 | 457111 |
| sncgb            | 32634  | 33579  | 22928  | 24485  |
| rap2b            | 4770   | 5140   | 4113   | 4537   |
| igfbp5a          | 13141  | 13214  | 9525   | 10829  |



|                  |       |       |       |       |
|------------------|-------|-------|-------|-------|
| abce1            | 27078 | 29837 | 19614 | 23725 |
| rasl11b          | 2903  | 2652  | 2326  | 2414  |
| grk7b            | 472   | 644   | 428   | 509   |
| sfrp2            | 1827  | 1897  | 1532  | 1695  |
| LOC567653        | 43    | 55    | 41    | 82    |
| cry2b            | 6707  | 6103  | 3811  | 4592  |
| fam102ba         | 2603  | 2797  | 2055  | 2184  |
| pygb             | 6880  | 6787  | 5294  | 5785  |
| thyn1            | 131   | 134   | 136   | 165   |
| zgc-63792        | 72    | 50    | 69    | 80    |
| zgc-56326        | 58605 | 47469 | 40091 | 49432 |
| crygm2d6         | 16205 | 14602 | 9938  | 12024 |
| zgc-109995       | 872   | 861   | 589   | 744   |
| kcnn1            | 893   | 944   | 803   | 741   |
| zgc-154001       | 8421  | 7817  | 6931  | 7469  |
| prmt1            | 15044 | 17036 | 11108 | 11249 |
| nol6             | 4352  | 4448  | 2899  | 3198  |
| col11a2          | 14118 | 14815 | 15126 | 15159 |
| zgc-163080       | 4204  | 3843  | 3263  | 3120  |
| zgc-73359        | 38596 | 39373 | 31152 | 31704 |
| zgc-92912        | 1817  | 1796  | 1173  | 1177  |
| si-dkey-30j22.11 | 10955 | 11535 | 7529  | 7733  |
| zgc-171553       | 3603  | 3283  | 2870  | 3314  |
| ttc27            | 7596  | 8149  | 5861  | 7510  |
| tomm40l          | 2529  | 2598  | 1902  | 2073  |
| mcm3             | 1197  | 1390  | 1094  | 1018  |
| si-dkey-236e20.2 | 648   | 495   | 352   | 372   |
| zgc-112285       | 18193 | 16422 | 11578 | 13790 |
| vim              | 51148 | 46705 | 36221 | 43782 |
| slc6a11          | 341   | 349   | 263   | 264   |
| zgc-152925       | 367   | 369   | 385   | 363   |
| LOC100001681     | 2103  | 2218  | 1598  | 1543  |
| zgc-92375        | 783   | 817   | 591   | 660   |
| cpsf2            | 4403  | 4691  | 3605  | 3831  |
| zgc-158781       | 345   | 302   | 342   | 402   |
| cdk1             | 445   | 490   | 344   | 387   |
| gad1b            | 40778 | 41869 | 29435 | 31786 |
| thbs4b           | 28256 | 27377 | 20356 | 25538 |
| abcd3a           | 12354 | 12680 | 8921  | 9510  |
| zgc-85777        | 8269  | 7975  | 7117  | 6555  |
| pdss2            | 499   | 616   | 479   | 515   |
| zgc-64213        | 2212  | 2246  | 1823  | 2261  |
| ptgs2b           | 780   | 1383  | 2908  | 3275  |
| zgc-110020       | 604   | 712   | 544   | 613   |
| gldc             | 26463 | 26384 | 19536 | 20062 |
| clic5            | 2975  | 3051  | 2303  | 2462  |
| zgc-91890        | 1421  | 1348  | 1156  | 1233  |
| dut              | 1760  | 2040  | 1950  | 1427  |
| zgc-101111       | 163   | 141   | 138   | 137   |
| calb2a           | 10152 | 10368 | 7810  | 7626  |
| homer1           | 1831  | 1836  | 1437  | 1591  |
| ncaldb           | 7097  | 7886  | 5325  | 6391  |

|                   |        |        |        |        |
|-------------------|--------|--------|--------|--------|
| krt15             | 135426 | 144824 | 119067 | 113078 |
| sprn2             | 3139   | 2876   | 2309   | 2632   |
| glcea             | 2614   | 2392   | 1723   | 1928   |
| itgb1bp3          | 6893   | 8316   | 5301   | 4096   |
| thrb              | 3636   | 3402   | 2235   | 2372   |
| zgc-136890        | 3334   | 3057   | 2088   | 2768   |
| sf3b4             | 3117   | 3275   | 2799   | 3015   |
| prkri             | 1857   | 1969   | 1621   | 1688   |
| ca15a             | 1078   | 1305   | 1072   | 1116   |
| chad              | 3076   | 2779   | 2472   | 2477   |
| si-ch211-132p20.4 | 24415  | 25007  | 18347  | 19451  |
| pygmb             | 11102  | 11772  | 8339   | 8978   |
| zgc-171470        | 62     | 84     | 57     | 56     |
| prdm1a            | 2176   | 2138   | 1702   | 1886   |
| prmt3             | 4317   | 4565   | 3252   | 3682   |
| rcc2              | 5839   | 6074   | 4822   | 5657   |
| zgc-136220        | 69684  | 67931  | 48013  | 56841  |
| zgc-112265        | 16270  | 14243  | 9659   | 12033  |
| prmt7             | 3037   | 3247   | 2523   | 2750   |
| ptp4a3            | 12954  | 11780  | 8104   | 8264   |
| f2                | 9215   | 9631   | 6892   | 7411   |
| pdcd11            | 15237  | 15467  | 10423  | 13085  |
| loxl3a            | 814    | 689    | 631    | 733    |
| smc1a             | 3102   | 3276   | 2149   | 2508   |
| crybb1            | 630282 | 653783 | 487723 | 601946 |
| zgc-165344        | 362323 | 360847 | 283187 | 302798 |
| ciapin1           | 3151   | 3271   | 2538   | 3045   |
| zgc-153441        | 1199   | 1191   | 875    | 952    |
| amdhd1            | 1151   | 1203   | 806    | 1071   |
| col9a2            | 23060  | 22720  | 21650  | 21451  |
| nox1              | 92     | 101    | 123    | 83     |
| scn1bb            | 14395  | 14353  | 10278  | 10488  |
| por               | 9361   | 9268   | 6304   | 6287   |
| atp2b1b           | 4990   | 4731   | 3676   | 4421   |
| nop58             | 11871  | 12512  | 9122   | 11024  |
| im-7136220        | 287    | 333    | 285    | 342    |
| foxc1a            | 2933   | 2728   | 2740   | 3433   |
| rfesd             | 83     | 114    | 74     | 105    |
| zgc-114181        | 5626   | 5797   | 4671   | 4806   |
| LOC565335         | 1086   | 1299   | 740    | 832    |
| smyhc3            | 1806   | 1749   | 1138   | 1404   |
| wdr75             | 7818   | 8162   | 5125   | 6237   |
| zgc-92804         | 11407  | 13694  | 9341   | 10462  |
| rab3ab            | 5725   | 6761   | 4216   | 4418   |
| ucp1              | 505312 | 484034 | 360732 | 446008 |
| mettl2a           | 1006   | 1140   | 764    | 895    |
| si-dkey-190l1.1   | 2976   | 3058   | 2123   | 2629   |
| usp37             | 3665   | 4080   | 2890   | 3369   |
| srd5a2a           | 3916   | 4038   | 3071   | 3159   |
| tspan13a          | 1504   | 1531   | 1138   | 1532   |
| atf4b1            | 59713  | 61942  | 52299  | 54482  |
| mapre1            | 8384   | 9338   | 6515   | 6633   |

|            |        |        |        |        |
|------------|--------|--------|--------|--------|
| vac14      | 2574   | 2612   | 1899   | 2199   |
| sepp1b     | 4166   | 4235   | 3107   | 3592   |
| itgbl1     | 2542   | 2446   | 2257   | 1900   |
| tgfb1a     | 1338   | 1323   | 1184   | 1378   |
| zgc-92085  | 355    | 258    | 269    | 170    |
| pdia2      | 8644   | 10087  | 8107   | 8601   |
| zgc-153989 | 1089   | 1126   | 883    | 1108   |
| egr2a      | 292    | 424    | 1357   | 2498   |
| tnfrsf1a   | 1539   | 1720   | 1402   | 1634   |
| zgc-136980 | 6720   | 6326   | 4522   | 4843   |
| ampd1      | 333512 | 340853 | 228508 | 240069 |
| LOC570267  | 2360   | 2699   | 1636   | 1854   |
| zgc-92174  | 7180   | 7066   | 6358   | 6856   |
| ca14       | 366    | 413    | 330    | 382    |
| nup133     | 5249   | 5651   | 4117   | 4985   |
| fth1b      | 4054   | 4089   | 3262   | 3275   |
| zgc-136858 | 1721   | 1859   | 1414   | 1696   |
| nhp2       | 2511   | 2765   | 1995   | 2295   |
| sdf2l1     | 1730   | 1902   | 1359   | 1385   |
| zgc-152958 | 7191   | 7140   | 5479   | 4911   |
| LOC555748  | 23364  | 23929  | 16357  | 18463  |
| wu-fb25h12 | 13009  | 12850  | 9302   | 10043  |
| zgc-162816 | 678    | 681    | 555    | 585    |
| gdpd1      | 2041   | 2542   | 1761   | 1623   |
| zgc-112335 | 1029   | 1150   | 966    | 875    |
| zgc-136333 | 434    | 411    | 271    | 341    |
| EIF2C3     | 716    | 704    | 566    | 428    |
| rtcd1      | 1946   | 1992   | 1559   | 1595   |
| tagln      | 9283   | 8555   | 7836   | 8529   |
| esd        | 3831   | 3555   | 2762   | 2809   |
| b4galt1    | 737    | 841    | 734    | 540    |
| grin1a     | 12033  | 12355  | 8643   | 9570   |
| hfe2       | 7293   | 8447   | 6305   | 7122   |
| gtpbbp10   | 2102   | 2107   | 1389   | 1604   |
| zgc-110289 | 378    | 341    | 244    | 239    |
| zgc-153034 | 1325   | 1471   | 1179   | 1403   |
| zgc-92296  | 878    | 775    | 811    | 1086   |
| znf367     | 447    | 608    | 503    | 558    |
| zgc-123333 | 8824   | 8372   | 8411   | 8872   |
| copb2      | 21181  | 21765  | 16279  | 16538  |
| zgc-173915 | 247    | 313    | 244    | 224    |
| cyp2aa3    | 148    | 186    | 133    | 112    |
| gnl3       | 9166   | 10057  | 7361   | 8520   |
| syt1b      | 206    | 166    | 146    | 170    |
| acy3.2     | 1342   | 1355   | 1064   | 1218   |
| nup98      | 20928  | 20949  | 14868  | 15705  |
| plcd1b     | 4337   | 4028   | 3272   | 3533   |
| coil       | 436    | 500    | 347    | 387    |
| ctbp2l     | 6918   | 7765   | 6615   | 6391   |
| rrm1       | 4130   | 4944   | 3986   | 3413   |
| gdf6a      | 585    | 570    | 503    | 603    |
| myo7aa     | 3429   | 3488   | 2477   | 2588   |

|                   |        |       |       |       |
|-------------------|--------|-------|-------|-------|
| zgc-92429         | 6136   | 5935  | 4389  | 5506  |
| xpo4              | 5497   | 5552  | 4000  | 4151  |
| glud1b            | 102851 | 98981 | 79522 | 84204 |
| aqp8b             | 14     | 24    | 13    | 18    |
| her6              | 2579   | 2759  | 2295  | 2521  |
| znf259            | 1911   | 1870  | 1385  | 1653  |
| trim13            | 7314   | 7402  | 5908  | 6310  |
| dhcr7             | 5953   | 6015  | 5048  | 5518  |
| nle1              | 2974   | 3055  | 2286  | 2779  |
| si-ch211-244h7.8  | 633    | 624   | 559   | 389   |
| ing5              | 2692   | 2495  | 2023  | 2283  |
| zgc-65857         | 6833   | 6783  | 6527  | 7335  |
| zgc-103652        | 3440   | 3490  | 2566  | 2697  |
| zgc-101710        | 1508   | 1712  | 1300  | 1248  |
| top1l             | 3856   | 4232  | 3012  | 3020  |
| anxa5b            | 7488   | 6444  | 6527  | 6738  |
| sec61a2           | 3795   | 4098  | 2806  | 3440  |
| zgc-136472        | 2190   | 2214  | 1595  | 1640  |
| caprin1a          | 4249   | 4568  | 3596  | 3649  |
| rag1              | 1044   | 886   | 770   | 784   |
| fah               | 9913   | 10126 | 7026  | 8495  |
| ppp1r3da          | 579    | 578   | 410   | 485   |
| zgc-158626        | 353    | 499   | 315   | 390   |
| slc27a4           | 3752   | 4053  | 2881  | 3323  |
| slc17a9b          | 1169   | 1206  | 961   | 967   |
| zgc-113363        | 801    | 1071  | 611   | 738   |
| cndp2             | 6303   | 5976  | 4689  | 5016  |
| zgc-91849         | 572    | 649   | 496   | 471   |
| aldh2a            | 4330   | 3902  | 3284  | 3484  |
| cog6              | 3952   | 4035  | 3019  | 3388  |
| slc25a32a         | 9158   | 8419  | 6542  | 7702  |
| ubb               | 19902  | 18091 | 13665 | 16041 |
| sort1a            | 5195   | 5087  | 4153  | 4293  |
| ruvb2             | 2338   | 2549  | 1880  | 1722  |
| zgc-158852        | 3048   | 2789  | 2625  | 2559  |
| def               | 2015   | 2021  | 1668  | 1862  |
| defbl1            | 930    | 867   | 801   | 720   |
| wisp3             | 354    | 398   | 405   | 395   |
| ctps              | 4632   | 5314  | 3499  | 4150  |
| hadh              | 7036   | 6493  | 4734  | 5753  |
| calr              | 3292   | 3338  | 3363  | 3157  |
| si-ch211-284o19.6 | 76     | 108   | 77    | 70    |
| zgc-101525        | 4425   | 4229  | 2948  | 2691  |
| ncapd2            | 1838   | 2027  | 1731  | 1399  |
| serpini1          | 7288   | 7275  | 5129  | 5120  |
| twistnb           | 2497   | 2551  | 2162  | 2676  |
| dtwd1             | 2274   | 2589  | 1768  | 2299  |
| fstb              | 3609   | 3496  | 3077  | 3815  |
| zgc-173962        | 545    | 559   | 379   | 359   |
| wdr18             | 1271   | 1446  | 1235  | 1205  |
| zgc-112515        | 2334   | 2217  | 1543  | 1925  |
| zgc-162909        | 359    | 393   | 411   | 384   |

|                   |       |       |       |       |
|-------------------|-------|-------|-------|-------|
| raly              | 4253  | 4102  | 3135  | 3404  |
| arf5              | 10673 | 10859 | 7853  | 8326  |
| si-ch211-198n5.11 | 754   | 775   | 665   | 615   |
| zgc-123339        | 5465  | 5571  | 4968  | 5562  |
| angpt2            | 114   | 130   | 138   | 158   |
| ephx2             | 6456  | 6299  | 4863  | 5235  |
| si-busm1-266f07.1 | 65    | 73    | 87    | 66    |
| zgc-123077        | 65    | 73    | 87    | 66    |
| zgc-152682        | 65    | 73    | 87    | 66    |
| zgc-171771        | 1661  | 1167  | 744   | 685   |
| sybu              | 13749 | 13955 | 9337  | 10322 |
| st3gal5l          | 2459  | 2350  | 2044  | 2476  |
| adipor2           | 39593 | 36068 | 27092 | 30446 |
| wsb1              | 43013 | 40891 | 30382 | 34699 |
| rgr               | 12108 | 12623 | 8696  | 10441 |
| zgc-66109         | 6720  | 6797  | 5186  | 5537  |
| wdr1              | 31144 | 32774 | 26660 | 26617 |
| entpd8            | 4933  | 4273  | 3449  | 3233  |
| igf2bp1           | 9777  | 10835 | 8094  | 8707  |
| or115-6           | 27    | 26    | 8     | 22    |
| pkd2              | 2589  | 2882  | 2079  | 2496  |
| ppm1g             | 5038  | 5426  | 4043  | 4767  |
| ugt2a3            | 3094  | 3162  | 2180  | 2519  |
| crabp2a           | 795   | 815   | 680   | 723   |
| mcm7              | 29421 | 30374 | 28830 | 29082 |
| ctsk              | 2115  | 2154  | 1995  | 2075  |
| glra1             | 3548  | 3967  | 2413  | 2365  |
| zgc-86715         | 103   | 96    | 88    | 99    |
| cyp2aa1           | 1553  | 1631  | 1270  | 1355  |
| cyb561d2          | 204   | 221   | 212   | 150   |
| zgc-158363        | 11398 | 12337 | 10354 | 11417 |
| cttnbp2nl         | 1980  | 2140  | 1733  | 2038  |
| si-dkey-194e6.1   | 1311  | 1335  | 1002  | 1079  |
| calb2b            | 11113 | 11839 | 8590  | 8913  |
| sik2a             | 2182  | 2493  | 1506  | 1919  |
| bin2b             | 349   | 327   | 273   | 298   |
| grk1a             | 3675  | 4209  | 3160  | 2876  |
| ccdc3             | 184   | 167   | 187   | 171   |
| prrc1             | 2736  | 2822  | 2389  | 2567  |
| fn1               | 8428  | 8684  | 7302  | 7680  |
| bbox1             | 2336  | 2318  | 2163  | 1784  |
| phlda2            | 971   | 1343  | 1667  | 2040  |
| otx5              | 14587 | 15745 | 15034 | 18286 |
| chrn5a            | 383   | 449   | 294   | 304   |
| slc5a12           | 3760  | 3571  | 3275  | 3545  |
| pfkfb4l           | 29198 | 31282 | 21930 | 22861 |
| meox1             | 772   | 749   | 582   | 711   |
| spns3             | 349   | 303   | 285   | 356   |
| gpt2              | 1703  | 1993  | 1320  | 1502  |
| isoc2             | 2660  | 2653  | 2023  | 2055  |
| pole2             | 781   | 906   | 682   | 681   |
| cyp17a1           | 673   | 711   | 428   | 465   |

|                 |       |       |       |       |
|-----------------|-------|-------|-------|-------|
| f13a1           | 2433  | 2431  | 1918  | 2303  |
| hm13            | 5522  | 5868  | 4350  | 4895  |
| tmem30c         | 2710  | 2779  | 2073  | 2371  |
| nfe2l3          | 1800  | 2041  | 1368  | 1555  |
| aspm            | 1258  | 1490  | 1138  | 1128  |
| s100a10a        | 22000 | 19759 | 14218 | 17501 |
| rbmx2           | 467   | 428   | 505   | 535   |
| zgc-64065       | 66    | 44    | 44    | 39    |
| ctsl1a          | 52808 | 59419 | 46184 | 51796 |
| qtrtd1          | 856   | 894   | 686   | 790   |
| zgc-63947       | 2618  | 2775  | 2023  | 2288  |
| unc119b         | 8935  | 9078  | 6653  | 7159  |
| mtr             | 4039  | 4854  | 3365  | 4028  |
| mir729          | 12    | 11    | 7     | 7     |
| fkbp7           | 306   | 358   | 314   | 229   |
| si-dkey-218l8.1 | 21648 | 21661 | 18761 | 19581 |
| sostdc1a        | 828   | 883   | 677   | 833   |
| cdk5r2a         | 16195 | 15900 | 11428 | 11588 |
| zgc-113516      | 1777  | 1944  | 1274  | 1353  |
| lect1           | 4703  | 4763  | 4893  | 5259  |
| ca4b            | 501   | 481   | 397   | 456   |
| ugt5a1          | 432   | 421   | 308   | 282   |
| pard6gb         | 1421  | 1387  | 1239  | 1400  |
| racgap1         | 565   | 602   | 476   | 428   |
| rprml           | 1048  | 1018  | 791   | 738   |
| lyz             | 3368  | 3698  | 2497  | 3254  |
| sox4b           | 20871 | 19744 | 18054 | 15731 |
| skiv2l2         | 5958  | 6354  | 4541  | 5443  |
| elk3            | 1730  | 1601  | 1353  | 1532  |
| foxo3b          | 59182 | 61192 | 42880 | 49731 |
| plod2           | 2058  | 1973  | 1517  | 1636  |
| cep55l          | 147   | 149   | 102   | 110   |
| aspn            | 758   | 865   | 668   | 793   |
| slc25a6         | 2928  | 3215  | 2124  | 2112  |
| zgc-56136       | 3256  | 3574  | 2287  | 2628  |
| rhoq            | 2586  | 2531  | 1878  | 1812  |
| snrpd2          | 2685  | 2692  | 1954  | 2199  |
| zgc-100997      | 122   | 144   | 153   | 159   |
| LOC791982       | 1997  | 2050  | 1786  | 1941  |
| inaa            | 3871  | 3918  | 2968  | 3227  |
| apom            | 6920  | 6399  | 5162  | 5581  |
| zgc-123285      | 2433  | 2375  | 2318  | 2319  |
| camk2d1         | 4310  | 4197  | 3092  | 3150  |
| zgc-73056       | 6632  | 6818  | 5408  | 5510  |
| bcan            | 6281  | 6820  | 4619  | 4895  |
| cldn15a         | 2765  | 2622  | 2375  | 2651  |
| timmm50         | 2295  | 2467  | 1673  | 1714  |
| trim3b          | 22986 | 22487 | 17271 | 18128 |
| zgc-63882       | 1396  | 1340  | 1048  | 1185  |
| ap1s3a          | 919   | 794   | 685   | 637   |
| f3b             | 481   | 613   | 572   | 824   |
| pcsk2           | 13169 | 13391 | 10249 | 9711  |

|                   |        |        |        |        |
|-------------------|--------|--------|--------|--------|
| si-dkey-235k4.1   | 3292   | 3579   | 2333   | 2379   |
| zgc-86811         | 1822   | 1850   | 1378   | 1653   |
| dhdds             | 2345   | 2178   | 1687   | 1826   |
| slc12a9           | 3446   | 3486   | 2570   | 3142   |
| ppat              | 2015   | 2156   | 1730   | 1899   |
| prph2a            | 16170  | 16178  | 11424  | 12900  |
| zgc-110343        | 3623   | 3461   | 2704   | 3062   |
| myl1              | 170107 | 177689 | 133626 | 142807 |
| papss2a           | 12078  | 11615  | 8534   | 8878   |
| zgc-158281        | 10540  | 9652   | 7079   | 7671   |
| seta              | 12393  | 13144  | 9562   | 10570  |
| cyp2aa3v1         | 117    | 153    | 111    | 89     |
| zgc-194937        | 6383   | 6383   | 8345   | 7991   |
| zgc-162651        | 2335   | 2375   | 1922   | 2315   |
| pelo              | 1989   | 2021   | 1456   | 1654   |
| galnt10           | 3528   | 3763   | 3355   | 3457   |
| ormdl3            | 597    | 724    | 427    | 410    |
| hax1              | 2401   | 2490   | 1625   | 1901   |
| tagln2            | 6369   | 6286   | 5385   | 5764   |
| ska3              | 131    | 126    | 121    | 90     |
| zgc-55815         | 10318  | 9867   | 8659   | 9614   |
| bsk146            | 1001   | 884    | 623    | 812    |
| ctssb.1           | 799    | 772    | 749    | 660    |
| alox12            | 2730   | 2386   | 2005   | 2466   |
| nop16             | 1688   | 1804   | 1358   | 1667   |
| zgc-175094        | 3107   | 3002   | 2146   | 2276   |
| zgc-194314        | 94     | 105    | 66     | 80     |
| foxq2             | 368    | 335    | 223    | 335    |
| srm               | 1101   | 1437   | 862    | 1019   |
| slc11a2           | 12044  | 13927  | 11167  | 12186  |
| nono              | 8275   | 8516   | 6302   | 6998   |
| wdr5              | 4645   | 4896   | 3599   | 3978   |
| drg1              | 3678   | 4173   | 2701   | 3170   |
| zgc-171978        | 330    | 334    | 277    | 343    |
| nrn1lb            | 2251   | 2384   | 2043   | 2331   |
| si-ch211-194e15.1 | 1575   | 1651   | 1098   | 1361   |
| dgat1a            | 3537   | 3202   | 2447   | 2633   |
| sdca4             | 10729  | 10388  | 8778   | 10008  |
| zgc-109901        | 2616   | 2924   | 2097   | 2355   |
| hcfc1a            | 15181  | 16371  | 13045  | 14401  |
| npm1              | 20396  | 22157  | 15695  | 19312  |
| zgc-153612        | 1447   | 1703   | 963    | 1121   |
| nup155            | 15035  | 16097  | 11984  | 13712  |
| cyb5b             | 988    | 1304   | 848    | 861    |
| lmnb1             | 4765   | 5108   | 3952   | 4411   |
| pawrl             | 1250   | 1120   | 1101   | 1313   |
| fbp1b             | 30374  | 27403  | 20625  | 23019  |
| scarb1            | 3819   | 3684   | 2583   | 2609   |
| slc34a2aas        | 2525   | 2582   | 2195   | 2541   |
| gapdh             | 554754 | 590318 | 420574 | 433993 |
| tbl1x             | 1592   | 1680   | 1178   | 1175   |
| dnrtip2           | 11520  | 12343  | 7794   | 9934   |

|               |        |        |        |        |
|---------------|--------|--------|--------|--------|
| zgc-92061     | 119810 | 120364 | 102523 | 103752 |
| crygm2d11     | 42172  | 40827  | 31772  | 34225  |
| sulf1         | 3537   | 4165   | 3183   | 3896   |
| xrn1          | 6795   | 7464   | 5033   | 5502   |
| atp7a         | 4506   | 4843   | 3514   | 3665   |
| acsm3         | 1370   | 1174   | 1125   | 1221   |
| cyp2k22       | 15     | 11     | 2      | 4      |
| zgc-112161    | 5606   | 5908   | 3963   | 4004   |
| zgc-158374    | 15604  | 15446  | 13797  | 15157  |
| cnn3a         | 7396   | 7225   | 6008   | 6107   |
| wdr36         | 5340   | 5618   | 3966   | 4520   |
| pdc4b         | 23688  | 23895  | 19926  | 21954  |
| zgc-158291    | 4865   | 5022   | 4047   | 4185   |
| rpap2         | 244    | 261    | 188    | 226    |
| nhp2l1        | 4604   | 4887   | 3359   | 3891   |
| zgc-171765    | 5401   | 5320   | 3653   | 3983   |
| arhgap11a     | 271    | 302    | 247    | 203    |
| ppp1r3ca      | 573    | 585    | 439    | 486    |
| camk2a        | 6053   | 6497   | 4203   | 4209   |
| agpat2        | 9779   | 9659   | 7302   | 8403   |
| ctsil         | 144    | 124    | 91     | 146    |
| actn3a        | 300061 | 297204 | 197491 | 226703 |
| ms4a17a.4     | 105    | 95     | 109    | 105    |
| vps72         | 2699   | 2576   | 2347   | 2527   |
| zgc-165347    | 20063  | 18620  | 15715  | 15948  |
| lrpap1        | 2059   | 2082   | 1709   | 1938   |
| zgc-165571    | 7597   | 7281   | 5810   | 5391   |
| zgc-110388    | 2803   | 3123   | 1884   | 2511   |
| pllp          | 1207   | 1242   | 990    | 1238   |
| mustn1        | 672    | 801    | 633    | 750    |
| zgc-110586    | 9167   | 9172   | 6556   | 7381   |
| acot11a       | 2247   | 2256   | 1751   | 1934   |
| rasd1         | 5289   | 4785   | 4305   | 4301   |
| slc25a32b     | 1089   | 1249   | 913    | 1070   |
| slc7a2        | 4793   | 4834   | 3817   | 3735   |
| c8a           | 2318   | 2099   | 1595   | 1803   |
| ccdc43        | 1180   | 1303   | 916    | 1276   |
| zgc-109987    | 3434   | 3721   | 2636   | 2928   |
| mapkapk2b     | 179    | 191    | 168    | 189    |
| tmed9         | 4171   | 4490   | 3308   | 3681   |
| zgc-158773    | 216    | 217    | 228    | 247    |
| tnni2a.2      | 2547   | 2595   | 1549   | 1726   |
| tmem33        | 3560   | 3744   | 2722   | 3188   |
| cyp8b2        | 113    | 130    | 83     | 86     |
| slc25a4       | 195125 | 218119 | 159536 | 161100 |
| EIF3JA        | 4507   | 4803   | 3304   | 4159   |
| si-dkey-6n6.1 | 8863   | 8713   | 7759   | 7900   |
| rcor2         | 1663   | 1711   | 1257   | 1295   |
| abcg2d        | 717    | 640    | 410    | 595    |
| elovl1a       | 1021   | 1113   | 900    | 655    |
| fam46c        | 4876   | 5996   | 4055   | 3863   |
| slc37a4b      | 5190   | 6356   | 4485   | 4179   |



|              |        |        |        |        |
|--------------|--------|--------|--------|--------|
| zgc-92599    | 1176   | 1278   | 812    | 840    |
| zgc-92578    | 43151  | 41647  | 31752  | 35022  |
| cfhl2        | 273    | 298    | 236    | 206    |
| zgc-194125   | 447    | 545    | 353    | 442    |
| hdr          | 451    | 481    | 334    | 364    |
| eftud2       | 6237   | 6422   | 4933   | 5145   |
| prkacba      | 105    | 90     | 72     | 56     |
| mat1a        | 16604  | 16763  | 12271  | 13061  |
| pparab       | 951    | 1102   | 694    | 777    |
| scg2b        | 41081  | 40032  | 29672  | 30738  |
| serpine2     | 5081   | 4883   | 4598   | 4762   |
| trmt6        | 928    | 1114   | 828    | 899    |
| sncga        | 9567   | 8763   | 7971   | 8591   |
| hnf4a        | 2075   | 1886   | 1437   | 1349   |
| mtx1b        | 795    | 945    | 719    | 677    |
| slc6a18      | 3262   | 2710   | 2589   | 2489   |
| pepd         | 16939  | 16350  | 13153  | 14269  |
| nipsnap1     | 348    | 378    | 314    | 303    |
| sfrp1a       | 1555   | 1690   | 1422   | 1588   |
| dcaf13       | 4715   | 5009   | 3395   | 3964   |
| ttc36        | 2552   | 2670   | 2127   | 2327   |
| smyd2b       | 3764   | 3813   | 3309   | 3412   |
| zgc-152873   | 10661  | 12347  | 7902   | 9096   |
| fgf1         | 433    | 431    | 288    | 229    |
| slc27a2      | 26528  | 27227  | 19074  | 21273  |
| fgb          | 14574  | 15728  | 11613  | 13288  |
| slc1a6       | 3856   | 4063   | 2336   | 2123   |
| cnih         | 3542   | 3832   | 2877   | 2932   |
| cse1l        | 6531   | 6947   | 4510   | 4938   |
| agtpbp1      | 4461   | 4649   | 3289   | 3776   |
| bxdc2        | 6879   | 7006   | 5502   | 6232   |
| itgb1b       | 4200   | 4285   | 3894   | 3824   |
| ido1         | 940    | 1068   | 573    | 725    |
| fxyd6l       | 6977   | 6909   | 4939   | 5151   |
| mdh1a        | 163229 | 163456 | 113934 | 116305 |
| zgc-136906   | 289    | 324    | 315    | 282    |
| zgc-112315   | 532    | 600    | 487    | 460    |
| zgc-194768   | 7045   | 7492   | 5513   | 6814   |
| gtdc1        | 322    | 299    | 159    | 232    |
| zgc-158619   | 3131   | 3471   | 2912   | 3223   |
| LOC564964    | 1471   | 1432   | 1043   | 1027   |
| LOC100003911 | 182    | 179    | 145    | 229    |
| ugt5a4       | 82     | 119    | 70     | 71     |
| ptpreb       | 4253   | 4007   | 2763   | 2906   |
| oxsr1b       | 4117   | 4325   | 3101   | 3693   |
| cryba2a      | 126823 | 125800 | 95857  | 111099 |
| runx2b       | 267    | 231    | 226    | 321    |
| zgc-64090    | 109    | 164    | 170    | 121    |
| hsd17b3      | 106    | 109    | 67     | 69     |
| dnase1       | 327    | 299    | 122    | 155    |
| zgc-136908   | 22340  | 19554  | 14600  | 18030  |
| zgc-110537   | 654    | 634    | 546    | 639    |

|                   |        |        |        |        |
|-------------------|--------|--------|--------|--------|
| LOC792049         | 2164   | 2294   | 1843   | 1982   |
| ugt5b1            | 369    | 403    | 303    | 342    |
| zgc-153721        | 1430   | 1431   | 1166   | 1209   |
| ldhd              | 1992   | 2086   | 1622   | 1654   |
| tmem204           | 1837   | 2071   | 2093   | 2345   |
| rabac1            | 3146   | 3517   | 2364   | 2479   |
| pole              | 1114   | 1269   | 902    | 828    |
| zgc-112231        | 80     | 56     | 60     | 80     |
| srl               | 47234  | 47936  | 36230  | 38722  |
| homez             | 2610   | 2676   | 2084   | 2248   |
| isl2b             | 3768   | 3919   | 3198   | 3473   |
| zgc-92127         | 2785   | 2853   | 2252   | 2768   |
| crygm2d5          | 5240   | 4932   | 2728   | 3586   |
| hsd3b7            | 4386   | 4187   | 3346   | 3282   |
| si-ch211-203b8.5  | 16630  | 17459  | 12674  | 13961  |
| nr4a1             | 10492  | 14695  | 14166  | 15760  |
| st6gal1           | 2801   | 2905   | 1879   | 2053   |
| zgc-113383        | 6237   | 6619   | 4821   | 5536   |
| aldh2b            | 791    | 832    | 679    | 626    |
| cyp2ad3           | 16709  | 15963  | 10980  | 13818  |
| mym1              | 2326   | 2284   | 1724   | 1973   |
| gfap              | 34505  | 31754  | 25431  | 27239  |
| zgc-109934        | 1669   | 1296   | 740    | 1082   |
| fhl2a             | 6771   | 6088   | 4792   | 5087   |
| foxn4             | 2082   | 2036   | 1688   | 1819   |
| pvalb8            | 34627  | 32907  | 21061  | 22483  |
| orc3              | 438    | 545    | 430    | 477    |
| prickle1a         | 4027   | 4222   | 2611   | 2917   |
| rac3b             | 11394  | 11744  | 8827   | 8842   |
| zgc-113314        | 170    | 181    | 150    | 158    |
| snrpc             | 2421   | 2854   | 2356   | 2516   |
| tank              | 391    | 274    | 311    | 319    |
| top2a             | 1406   | 1634   | 1517   | 1207   |
| si-ch211-214p16.2 | 417    | 439    | 325    | 324    |
| zgc-64098         | 1332   | 1395   | 1140   | 1312   |
| zgc-73225         | 3977   | 3822   | 2757   | 3143   |
| zgc-113070        | 1088   | 985    | 804    | 999    |
| zgc-153411        | 9613   | 9620   | 8703   | 9428   |
| LOC791723         | 63     | 81     | 67     | 53     |
| pck1              | 457507 | 398922 | 357587 | 360258 |
| slc1a2b           | 145899 | 147827 | 114374 | 124818 |
| mrpl38            | 4848   | 5123   | 3987   | 4431   |
| zgc-153417        | 3224   | 3702   | 2700   | 3012   |
| gpd2              | 1936   | 2100   | 1566   | 1897   |
| si-ch211-69g19.2  | 1214   | 1242   | 1143   | 1052   |
| rbb4l             | 4030   | 4101   | 3068   | 3090   |
| sdr16c5b          | 6823   | 6963   | 5630   | 6355   |
| zgc-101565        | 18266  | 20891  | 19639  | 12947  |
| fli1a             | 4062   | 3785   | 3618   | 4217   |
| mcm10             | 107    | 92     | 84     | 112    |
| srgap2b           | 5410   | 5548   | 4264   | 4124   |
| prkcbb            | 5883   | 6038   | 4149   | 4225   |

|                   |       |       |       |       |
|-------------------|-------|-------|-------|-------|
| stab1l            | 3163  | 2825  | 2083  | 2481  |
| tmbim1            | 2222  | 1868  | 1786  | 2138  |
| igsf21b           | 6852  | 7337  | 4695  | 5221  |
| mir29b-1          | 320   | 340   | 222   | 302   |
| necab2            | 5145  | 5256  | 3551  | 3358  |
| aldh18a1          | 2576  | 2782  | 1909  | 2155  |
| zgc-171885        | 556   | 556   | 547   | 444   |
| zgc-113199        | 63    | 62    | 70    | 51    |
| bcat1             | 4852  | 4661  | 3029  | 3703  |
| zgc-153061        | 9484  | 8627  | 6869  | 8427  |
| gygl              | 35067 | 34258 | 23719 | 28003 |
| zgc-112986        | 1824  | 1625  | 1048  | 1298  |
| dvl2              | 2916  | 2878  | 2395  | 2875  |
| cdk2              | 403   | 296   | 287   | 293   |
| ntm               | 2207  | 2297  | 1539  | 1487  |
| zgc-101859        | 13629 | 14529 | 10446 | 11510 |
| rogdi             | 5599  | 5834  | 4349  | 4664  |
| rdh12             | 4037  | 4462  | 2952  | 2699  |
| psmd7             | 6654  | 6863  | 4565  | 5717  |
| zbtb20            | 609   | 1080  | 402   | 686   |
| pc                | 5905  | 5121  | 4558  | 4177  |
| zgc-158410        | 6850  | 6628  | 4557  | 5278  |
| slc37a4a          | 6098  | 5703  | 4432  | 4377  |
| ddx19             | 2475  | 2838  | 2152  | 2371  |
| zgc-171646        | 4899  | 5099  | 3778  | 4208  |
| slc8a4a           | 7895  | 9414  | 6162  | 6269  |
| hmgb2l            | 11342 | 11759 | 10221 | 10110 |
| zgc-158429        | 1295  | 1510  | 987   | 1134  |
| atp2b3b           | 24260 | 26196 | 17107 | 18431 |
| zgc-103720        | 13505 | 11803 | 9934  | 12182 |
| prim1             | 673   | 688   | 621   | 493   |
| hbbe3             | 1     | 5     | 1     | 2     |
| zgc-113276        | 1074  | 1098  | 835   | 890   |
| zgc-171416        | 376   | 394   | 334   | 327   |
| acat2             | 2391  | 2579  | 2030  | 1682  |
| slc9a3r1          | 3484  | 3986  | 2801  | 3202  |
| acmsd             | 1698  | 1637  | 1188  | 1280  |
| lrrc8a            | 3493  | 3605  | 2505  | 3110  |
| traf4a            | 5915  | 6513  | 5369  | 5897  |
| zgc-165522        | 1026  | 1191  | 847   | 890   |
| noc2l             | 9274  | 10105 | 6269  | 8530  |
| zgc-110152        | 20677 | 18694 | 12669 | 14249 |
| si-ch211-195b13.1 | 24777 | 25850 | 20983 | 22235 |
| chrnb3b           | 436   | 464   | 332   | 333   |
| scn4bb            | 1079  | 1348  | 931   | 1163  |
| si-ch211-240l19.6 | 1128  | 1185  | 1137  | 1323  |
| zgc-101853        | 25669 | 27377 | 19561 | 21093 |
| zgc-73336         | 5762  | 6539  | 4541  | 4248  |
| slc17a6b          | 9021  | 9249  | 6588  | 6777  |
| matn3a            | 18882 | 17425 | 14616 | 15239 |
| g3bp1             | 11108 | 12261 | 8712  | 9752  |
| tspan12           | 2058  | 2177  | 1633  | 1760  |

|                  |       |       |       |       |
|------------------|-------|-------|-------|-------|
| sox6             | 7365  | 7939  | 5502  | 6497  |
| sphkap           | 10219 | 10024 | 7641  | 8335  |
| nup50            | 8101  | 8748  | 6752  | 7055  |
| wdr92            | 406   | 504   | 366   | 404   |
| stxbp5a          | 7372  | 7704  | 5201  | 5384  |
| galnt14          | 3418  | 3462  | 2432  | 2937  |
| cdkal1           | 3988  | 4647  | 3661  | 4185  |
| pitpnb           | 1208  | 1279  | 795   | 916   |
| hmgcrb           | 7790  | 7802  | 5970  | 5795  |
| rfc4             | 1319  | 1441  | 1174  | 1007  |
| LOC564395        | 3014  | 3008  | 3060  | 3254  |
| cldn2            | 1630  | 1648  | 1434  | 1671  |
| lap3             | 2372  | 2591  | 1927  | 2393  |
| kng1             | 7503  | 7683  | 5468  | 6429  |
| insl5a           | 406   | 397   | 365   | 362   |
| antxr2a          | 557   | 502   | 369   | 521   |
| ebna1bp2l        | 1979  | 2088  | 1584  | 1834  |
| vgl12b           | 5378  | 5639  | 4931  | 5520  |
| sepn1            | 852   | 846   | 584   | 575   |
| camk1g           | 13007 | 14378 | 11450 | 12770 |
| si-dkeyp-87e7.3  | 1337  | 1432  | 829   | 803   |
| tfr1b            | 976   | 1071  | 830   | 768   |
| fcf1             | 1549  | 1733  | 1147  | 1366  |
| si-dkey-252h13.5 | 4393  | 4317  | 4061  | 4202  |
| pbk              | 281   | 292   | 197   | 142   |
| zgc-136406       | 640   | 662   | 414   | 602   |
| wnt4a            | 420   | 410   | 429   | 382   |
| zgc-153911       | 327   | 417   | 743   | 985   |
| calm3a           | 14265 | 13978 | 10388 | 10315 |
| zgc-171453       | 2232  | 2530  | 1702  | 1916  |
| zgc-123335       | 4     | 14    | 17    | 12    |
| zgc-91874        | 3107  | 3184  | 2385  | 2455  |
| ttpa             | 1964  | 1912  | 1259  | 1534  |
| gucy2f           | 1209  | 1153  | 860   | 793   |
| sumo3b           | 2035  | 2091  | 1531  | 1582  |
| tshb             | 253   | 207   | 304   | 329   |
| zgc-65772        | 9381  | 9377  | 8669  | 9996  |
| tmem88b          | 670   | 752   | 655   | 871   |
| tufm             | 10462 | 11420 | 9058  | 9288  |
| colec11          | 375   | 347   | 268   | 244   |
| acbd3            | 1590  | 1803  | 1215  | 1493  |
| heatr3           | 3937  | 4436  | 3039  | 3886  |
| cx30.3           | 2840  | 2749  | 2150  | 2408  |
| snrpb            | 16441 | 16307 | 15547 | 15001 |
| ndor1            | 712   | 750   | 568   | 620   |
| tyrp1b           | 48131 | 58644 | 53938 | 52078 |
| ccne2            | 432   | 466   | 410   | 397   |
| ankrd6           | 8361  | 8108  | 6608  | 7696  |
| bmp1b            | 1885  | 1932  | 1414  | 1367  |
| si-dkey-24h18.2  | 244   | 213   | 150   | 236   |
| nab1a            | 1888  | 1760  | 1184  | 1110  |
| slit1a           | 21359 | 22824 | 17073 | 18704 |

|                  |        |        |        |        |
|------------------|--------|--------|--------|--------|
| setb             | 14686  | 15824  | 10739  | 12184  |
| zgc-100896       | 10145  | 9067   | 6271   | 7449   |
| zgc-91930        | 224650 | 235995 | 183398 | 180376 |
| nptna            | 7266   | 8025   | 5810   | 6121   |
| zgc-101555       | 4237   | 4363   | 3117   | 3551   |
| itprip           | 496    | 466    | 416    | 490    |
| traf7            | 5258   | 5171   | 3616   | 3836   |
| syt5b            | 18643  | 19211  | 13940  | 15389  |
| hlx1             | 986    | 991    | 852    | 1378   |
| tlcd2            | 4973   | 5086   | 3462   | 3781   |
| gdap2            | 1688   | 1748   | 1346   | 1436   |
| neur1b           | 1100   | 1058   | 949    | 1113   |
| as3mt            | 1351   | 1407   | 1143   | 1001   |
| nr1i2            | 4883   | 5221   | 2934   | 3267   |
| ankrd16          | 1198   | 1382   | 1139   | 1116   |
| zgc-136449       | 833    | 854    | 666    | 792    |
| crygm2d12        | 68672  | 66523  | 50174  | 51982  |
| gabra1           | 8885   | 9516   | 6203   | 6363   |
| dvl3             | 2382   | 2318   | 2090   | 2189   |
| rab1a            | 5984   | 6282   | 5440   | 6272   |
| LOC564909        | 1173   | 1135   | 807    | 976    |
| ube2d2           | 2801   | 3080   | 2478   | 2681   |
| zgc-91818        | 2896   | 2677   | 2206   | 2309   |
| LOC569000        | 25780  | 29038  | 23227  | 22604  |
| phyhd1           | 6570   | 6251   | 4634   | 4550   |
| zgc-172248       | 1521   | 1570   | 1015   | 1347   |
| zgc-110307       | 4421   | 3843   | 3196   | 3785   |
| vcl              | 10715  | 10916  | 8590   | 9469   |
| crygm2d16        | 39753  | 38494  | 32404  | 31091  |
| zgc-86841        | 2774   | 3276   | 2393   | 2609   |
| snrpd3l          | 1468   | 1595   | 1347   | 1262   |
| cyp2k16          | 1519   | 1213   | 1061   | 1298   |
| rnasekb          | 1732   | 1706   | 1676   | 1441   |
| zgc-194209       | 1335   | 1291   | 924    | 1182   |
| arrdc2           | 46274  | 32671  | 26026  | 22762  |
| surf6            | 1731   | 1836   | 1233   | 1559   |
| lhfp13           | 9727   | 9401   | 6892   | 7317   |
| zgc-158387       | 11415  | 10251  | 9044   | 8850   |
| msxb             | 568    | 614    | 493    | 573    |
| zgc-112001       | 4320   | 4288   | 3188   | 3352   |
| zgc-77358        | 220    | 223    | 279    | 326    |
| zbtb37           | 829    | 982    | 755    | 840    |
| zgc-64116        | 221    | 177    | 191    | 242    |
| slc32a1          | 22488  | 23562  | 17240  | 16695  |
| dtl              | 160    | 221    | 149    | 191    |
| snx19a           | 1288   | 1130   | 954    | 1025   |
| trh              | 2250   | 2032   | 1716   | 1762   |
| acot7            | 1166   | 1182   | 1009   | 1138   |
| rgs7bpa          | 2084   | 2049   | 1470   | 1620   |
| si-dkey-192p21.6 | 130    | 137    | 174    | 135    |
| slc8a1b          | 7870   | 7991   | 5653   | 5182   |
| ddx39b           | 20358  | 22301  | 15799  | 16122  |

|                 |         |         |         |         |
|-----------------|---------|---------|---------|---------|
| nnr             | 0       | 0       | 0       | 0       |
| anxa4           | 12023   | 12692   | 9740    | 10914   |
| lrpprc          | 17295   | 19255   | 12958   | 14764   |
| pvalb2          | 1811861 | 1761438 | 1080497 | 1184983 |
| zgc-112104      | 5463    | 5902    | 3669    | 4289    |
| ghitm           | 20051   | 20766   | 19775   | 21648   |
| hnrnpa3         | 1701    | 1860    | 1472    | 1501    |
| rs1             | 11494   | 12034   | 9213    | 10346   |
| mtmr1b          | 1010    | 965     | 619     | 682     |
| polr1c          | 1616    | 1593    | 1178    | 1178    |
| stmn2a          | 14380   | 14812   | 9688    | 10179   |
| zgc-85772       | 717     | 759     | 645     | 670     |
| tob1b           | 74203   | 73526   | 61192   | 62973   |
| zgc-92181       | 1839    | 1790    | 1428    | 1640    |
| rbm25           | 7129    | 7488    | 5735    | 6829    |
| rrs1            | 2183    | 2609    | 1935    | 2093    |
| sypa            | 26838   | 26286   | 20765   | 21267   |
| dclk1           | 8457    | 9447    | 6590    | 6749    |
| zgc-165649      | 239     | 290     | 246     | 243     |
| si-dkeyp-73d8.9 | 349     | 231     | 188     | 253     |
| zgc-123180      | 2677    | 2722    | 2368    | 2759    |
| rbm28           | 6134    | 5942    | 4574    | 5764    |
| ncaph2          | 405     | 426     | 281     | 255     |
| pcdh18a         | 5375    | 5141    | 4484    | 4688    |
| irf8            | 347     | 341     | 282     | 411     |
| rab3c           | 2405    | 2487    | 1888    | 1830    |
| cd40            | 419     | 398     | 328     | 376     |
| dao.3           | 102     | 116     | 75      | 61      |
| capn1a          | 5758    | 5444    | 3923    | 4268    |
| gsnb            | 2427    | 2161    | 1733    | 1640    |
| zgc-173506      | 4141    | 4478    | 3118    | 3301    |
| tlr5b           | 583     | 677     | 406     | 505     |
| zgc-85944       | 1473    | 1799    | 1557    | 1481    |
| tef             | 40259   | 38495   | 26652   | 30734   |
| tubb5           | 14413   | 16045   | 14497   | 13078   |
| timm10          | 1207    | 1411    | 957     | 1040    |
| slc20a1b        | 44357   | 51441   | 38372   | 38935   |
| lnx1            | 21325   | 20637   | 16468   | 17829   |
| cep97           | 4172    | 4226    | 3678    | 4037    |
| zgc-158296      | 587     | 624     | 563     | 417     |
| dkfzp564o0523   | 2016    | 1791    | 1395    | 1665    |
| mfsd4a          | 646     | 595     | 562     | 685     |
| esrra           | 5842    | 5618    | 4009    | 3581    |
| syncrip         | 34487   | 36598   | 30046   | 34213   |
| fbx114b         | 4080    | 4627    | 3614    | 3951    |
| ms4a17a.9       | 1154    | 1288    | 1006    | 1491    |
| arpc5a          | 2000    | 1856    | 1512    | 1544    |
| camk2d2         | 14556   | 15371   | 10400   | 10821   |
| zgc-158263      | 2435    | 2149    | 1716    | 2061    |
| psmc3           | 11507   | 12116   | 8340    | 9696    |
| pcbp3           | 6152    | 7266    | 4312    | 5217    |
| cradd           | 176     | 193     | 187     | 235     |

|                   |         |         |        |        |
|-------------------|---------|---------|--------|--------|
| sf3b3             | 1170    | 1199    | 843    | 912    |
| api5              | 6573    | 6614    | 4859   | 5542   |
| fhl               | 1144    | 1021    | 982    | 980    |
| fga               | 20019   | 20877   | 14580  | 16342  |
| hkdc1             | 1123    | 1039    | 904    | 1080   |
| mirlet7i          | 34      | 32      | 28     | 16     |
| mylz3             | 1098656 | 1138736 | 826060 | 783996 |
| chka              | 18217   | 17051   | 11718  | 13990  |
| zgc-64031         | 1815    | 1866    | 1687   | 1900   |
| gtf3aa            | 2369    | 2390    | 1553   | 1680   |
| tcea3             | 4032    | 3902    | 3111   | 3423   |
| zgc-153240        | 4588    | 4596    | 3787   | 3780   |
| zgc-103639        | 69191   | 68855   | 50549  | 51350  |
| LOC790901         | 333     | 230     | 246    | 273    |
| nrn1              | 2197    | 2236    | 1770   | 1653   |
| zgc-172295        | 2042    | 2041    | 1559   | 1814   |
| rasgrf2           | 2598    | 3214    | 1683   | 1895   |
| chchd10           | 4857    | 5337    | 4684   | 4821   |
| snrpfl            | 826     | 981     | 805    | 741    |
| cntn1b            | 6539    | 7225    | 5463   | 5107   |
| zgc-136569        | 19398   | 21420   | 14788  | 17425  |
| eef2a.1           | 1239    | 1280    | 953    | 1266   |
| thbs3b            | 2912    | 2627    | 2235   | 2759   |
| zfp36l1b          | 19836   | 19592   | 15719  | 19498  |
| gmppb             | 6079    | 6122    | 4416   | 4806   |
| ctdspla           | 13120   | 11620   | 9814   | 10429  |
| LOC100003896      | 0       | 0       | 1      | 3      |
| prlra             | 3887    | 3742    | 2899   | 3305   |
| LOC568697         | 1330    | 1341    | 911    | 1151   |
| ptpn4b            | 8223    | 9167    | 6600   | 7052   |
| snrpa1            | 1796    | 2040    | 1623   | 1728   |
| zgc-153921        | 69      | 77      | 31     | 37     |
| b3galt2           | 11639   | 11974   | 8575   | 9518   |
| snupn             | 1858    | 1859    | 1404   | 1485   |
| jhdm1db           | 3253    | 3295    | 2296   | 2395   |
| rltgr             | 1598    | 1779    | 1120   | 1349   |
| gria4b            | 13343   | 13795   | 9576   | 9804   |
| nek8              | 319     | 328     | 263    | 296    |
| polr3e            | 12888   | 13375   | 9181   | 11022  |
| pcbd1             | 2149    | 2276    | 1665   | 1669   |
| ampd3             | 12868   | 10714   | 8224   | 9428   |
| disp2             | 4693    | 5036    | 3461   | 3506   |
| tuba1l            | 23489   | 26110   | 20344  | 19638  |
| LOC100007315      | 2428    | 2218    | 1798   | 1897   |
| slc33a1           | 1175    | 1021    | 887    | 949    |
| pola2             | 637     | 788     | 518    | 472    |
| clk4b             | 3469    | 3405    | 2251   | 2995   |
| si-ch211-14a17.13 | 6       | 0       | 0      | 7      |
| zgc-158791        | 3692    | 4301    | 3011   | 3408   |
| osbpl7            | 13445   | 13566   | 9973   | 11502  |
| boka              | 1724    | 1508    | 1225   | 1432   |
| zgc-158350        | 9073    | 9391    | 8159   | 8183   |

|                   |       |       |       |       |
|-------------------|-------|-------|-------|-------|
| grna              | 1104  | 1193  | 1064  | 1046  |
| umps              | 1101  | 1334  | 916   | 1028  |
| dnaja3b           | 636   | 617   | 405   | 447   |
| itga5             | 1742  | 1741  | 1460  | 1513  |
| sqstm1            | 17794 | 14674 | 12274 | 13491 |
| mybbp1a           | 13105 | 13514 | 9752  | 13382 |
| slc22a7a          | 1871  | 2065  | 2125  | 1671  |
| egfl7             | 683   | 731   | 675   | 785   |
| atp2b2            | 22800 | 24869 | 17506 | 18332 |
| EIF4E             | 1217  | 1224  | 966   | 1104  |
| enpp5             | 4028  | 3950  | 2550  | 2554  |
| gosr1             | 1918  | 2014  | 1537  | 1681  |
| kctd15b           | 1488  | 1416  | 1116  | 1238  |
| foxi3b            | 1382  | 1359  | 1155  | 1331  |
| pak7              | 14753 | 14715 | 12242 | 14112 |
| pcdh15a           | 4161  | 4420  | 3262  | 3264  |
| atp6v1b2          | 12976 | 12226 | 8370  | 8594  |
| kbtbd12           | 12011 | 11453 | 8479  | 9113  |
| herpud1           | 6406  | 6339  | 4992  | 6008  |
| zgc-153368        | 2062  | 2146  | 1600  | 1946  |
| sly1              | 5154  | 5214  | 3617  | 4110  |
| tia1l             | 8827  | 9481  | 6695  | 7553  |
| abcb9             | 1912  | 2000  | 1333  | 1423  |
| scn8ab            | 8568  | 9554  | 5776  | 5914  |
| si-ch211-137i24.5 | 1111  | 1072  | 900   | 831   |
| tomm20a           | 3868  | 4737  | 3164  | 3971  |
| zgc-101723        | 9139  | 9497  | 7558  | 7846  |
| vcp               | 35776 | 38346 | 24820 | 28729 |
| drd3              | 1276  | 1202  | 1026  | 1107  |
| fxn               | 546   | 669   | 412   | 553   |
| itgb3b            | 499   | 422   | 409   | 466   |
| tnpo2             | 18214 | 18289 | 12541 | 14808 |
| zgc-153423        | 3581  | 3541  | 2433  | 2648  |
| exosc9            | 847   | 982   | 687   | 625   |
| zgc-92066         | 26576 | 26937 | 18352 | 22355 |
| grpel1            | 2550  | 2693  | 1792  | 2074  |
| lmnb2             | 9214  | 9564  | 8273  | 8429  |
| lias              | 1828  | 1795  | 1399  | 1606  |
| LOC796505         | 4658  | 4601  | 3592  | 4283  |
| fen1              | 841   | 1042  | 726   | 615   |
| il4r              | 211   | 236   | 208   | 203   |
| nudt1             | 233   | 229   | 229   | 226   |
| slc22a18          | 3402  | 3281  | 2828  | 2934  |
| zgc-112368        | 1321  | 1234  | 1133  | 1433  |
| gad2              | 34662 | 37038 | 25700 | 28721 |
| sncb              | 17546 | 17852 | 14557 | 17335 |
| acad8             | 3908  | 3821  | 2860  | 3261  |
| dye               | 8230  | 8439  | 6349  | 6964  |
| jag1b             | 3692  | 3742  | 2929  | 3024  |
| zgc-92749         | 508   | 510   | 405   | 479   |
| hnrnpu            | 14894 | 15855 | 12058 | 12780 |
| EIF2B1            | 322   | 376   | 227   | 303   |



|                   |        |        |       |       |
|-------------------|--------|--------|-------|-------|
| ddx49             | 1963   | 1910   | 1369  | 1644  |
| slc2a5            | 40     | 46     | 71    | 64    |
| zgc-65780         | 2692   | 2893   | 2786  | 2952  |
| chga              | 5471   | 5099   | 3791  | 3774  |
| samd7             | 1760   | 2187   | 2018  | 2072  |
| zgc-174637        | 345    | 336    | 237   | 216   |
| arfgap2           | 13257  | 13460  | 9212  | 10155 |
| ccdc85a1          | 2696   | 2573   | 2001  | 2343  |
| cacna1sa          | 4827   | 4849   | 3254  | 3513  |
| zgc-153968        | 7409   | 6627   | 5830  | 5765  |
| ablim1b           | 4741   | 5555   | 3634  | 4068  |
| si-ch211-234f14.1 | 607    | 599    | 488   | 567   |
| sept8b            | 1887   | 1659   | 1357  | 1635  |
| zgc-123284        | 592    | 705    | 514   | 480   |
| zgc-110801        | 7056   | 7714   | 5940  | 6561  |
| LOC797799         | 110    | 113    | 64    | 83    |
| abcf2             | 7103   | 8676   | 6129  | 5788  |
| cki               | 119564 | 114102 | 86093 | 90772 |
| minal             | 8588   | 10125  | 8231  | 10842 |
| pnp4a             | 1481   | 1694   | 1453  | 1402  |
| si-dkey-208k22.3  | 1807   | 1667   | 1409  | 1589  |
| EIF3JB            | 4412   | 4797   | 3162  | 3545  |
| nrxn1b            | 4029   | 4259   | 2999  | 3453  |
| ms4a17a.5         | 142    | 121    | 122   | 155   |
| ddx18             | 9316   | 8929   | 6728  | 7821  |
| fam69c            | 1251   | 1285   | 1010  | 1261  |
| rab3da            | 526    | 458    | 399   | 413   |
| si-dkey-7o6.3     | 315    | 277    | 229   | 180   |
| zgc-123068        | 517    | 570    | 425   | 444   |
| phlda3            | 612    | 645    | 464   | 503   |
| cnksr1            | 3140   | 3026   | 2180  | 2438  |
| casq2             | 4452   | 4539   | 2724  | 2831  |
| scpp8             | 32     | 47     | 52    | 61    |
| si-ch211-244b2.3  | 423    | 415    | 352   | 350   |
| si-ch211-121a2.2  | 4482   | 2477   | 1627  | 2017  |
| zgc-114045        | 2668   | 2460   | 2110  | 1966  |
| LOC100005578      | 0      | 0      | 2     | 2     |
| zgc-162212        | 678    | 700    | 583   | 591   |
| trmt2a            | 1065   | 1195   | 882   | 1059  |
| xpo6              | 12594  | 12205  | 8839  | 9028  |
| ednra             | 1392   | 1548   | 1162  | 1380  |
| tk1               | 591    | 704    | 673   | 519   |
| tuba2             | 29712  | 31511  | 23461 | 22494 |
| or115-15          | 41     | 43     | 29    | 49    |
| zgc-55418         | 8688   | 8393   | 6201  | 7002  |
| zgc-103599        | 51     | 77     | 40    | 41    |
| zgc-101594        | 1240   | 1326   | 899   | 1117  |
| sesn3             | 5271   | 5012   | 4108  | 4192  |
| yaf2              | 1692   | 1710   | 1231  | 1443  |
| cdh5              | 2039   | 1997   | 1348  | 1873  |
| masp2             | 1102   | 1220   | 870   | 934   |
| ehhadh            | 2068   | 2165   | 1496  | 1328  |

|                 |       |       |       |       |
|-----------------|-------|-------|-------|-------|
| cfhl1           | 150   | 173   | 121   | 141   |
| aatf            | 2742  | 2687  | 1833  | 2362  |
| chtf18          | 466   | 426   | 375   | 499   |
| sh3bp5          | 3695  | 3825  | 3125  | 3094  |
| cplx2           | 1904  | 2203  | 1387  | 1383  |
| zgc-153426      | 2054  | 2471  | 1905  | 1770  |
| hnrnpa0         | 33327 | 35871 | 31873 | 33352 |
| zgc-101814      | 499   | 620   | 434   | 466   |
| twist1a         | 1426  | 1547  | 1608  | 1935  |
| zgc-101663      | 2034  | 2074  | 1374  | 1793  |
| myst2           | 4092  | 4269  | 3161  | 3595  |
| lamb1a          | 9307  | 8808  | 7986  | 9154  |
| maf             | 3097  | 3231  | 2478  | 2329  |
| zgc-110655      | 21069 | 22726 | 18755 | 21860 |
| nova1           | 10111 | 10990 | 8313  | 9360  |
| zgc-55558       | 3643  | 3952  | 2748  | 2865  |
| rcn3            | 299   | 288   | 221   | 278   |
| bgn             | 521   | 463   | 475   | 597   |
| mgat4b          | 6517  | 5988  | 4461  | 4626  |
| nos2a           | 72    | 36    | 25    | 23    |
| and4            | 1932  | 1844  | 2060  | 1816  |
| ctnna           | 10209 | 10303 | 8486  | 8543  |
| zgc-101668      | 1434  | 1493  | 1399  | 1078  |
| zgc-77767       | 3737  | 3905  | 3155  | 3099  |
| or109-11        | 34    | 36    | 35    | 28    |
| rhag            | 23188 | 22874 | 17482 | 19724 |
| lgi3            | 1545  | 1639  | 1008  | 888   |
| utp6            | 3939  | 3788  | 2439  | 3242  |
| tuba8l2         | 97705 | 94434 | 68679 | 80924 |
| abca5           | 5631  | 6087  | 4111  | 4512  |
| LOC555288       | 1069  | 1323  | 899   | 994   |
| pdgfra          | 2564  | 2567  | 2038  | 2263  |
| lrit3           | 83    | 43    | 34    | 60    |
| pmelb           | 4309  | 4506  | 3894  | 3838  |
| acp1            | 2234  | 2331  | 1850  | 2086  |
| zgc-110417      | 107   | 169   | 156   | 112   |
| sgcg            | 800   | 948   | 684   | 705   |
| zgc-110717      | 1159  | 1132  | 816   | 823   |
| si-dkeyp-35b8.5 | 1477  | 1717  | 1297  | 1158  |
| si-ch73-52e5.2  | 244   | 221   | 191   | 228   |
| per2            | 80316 | 92143 | 62611 | 66217 |
| camk4           | 3736  | 3657  | 2814  | 3025  |
| EIF4BB          | 20994 | 21988 | 15913 | 18382 |
| zgc-65894       | 27031 | 28724 | 22107 | 20898 |
| srp14           | 1638  | 1569  | 1302  | 1405  |
| tmem38a         | 58538 | 58594 | 42979 | 45340 |
| zgc-153723      | 62    | 77    | 140   | 62    |
| esco2           | 504   | 545   | 445   | 360   |
| lancl1          | 5798  | 5414  | 3790  | 4045  |
| zgc-165508      | 1365  | 1489  | 804   | 898   |
| plk1            | 914   | 1150  | 835   | 724   |
| alcamb          | 5022  | 4981  | 4123  | 4700  |

|              |       |       |       |       |
|--------------|-------|-------|-------|-------|
| miox         | 3530  | 3776  | 3068  | 3305  |
| prph2l       | 672   | 750   | 550   | 590   |
| kcnip3l      | 1506  | 1528  | 1255  | 1112  |
| ttk          | 896   | 893   | 724   | 600   |
| zgc-153296   | 3142  | 3358  | 2822  | 2480  |
| sgk2a        | 1502  | 1392  | 1408  | 1395  |
| tmie         | 887   | 796   | 532   | 469   |
| gem          | 2260  | 2005  | 1663  | 1720  |
| ets2         | 16651 | 17815 | 17273 | 17301 |
| csf3         | 106   | 109   | 102   | 169   |
| zgc-113263   | 1073  | 1049  | 731   | 706   |
| rrp15        | 2583  | 2562  | 2167  | 2518  |
| mad1l1       | 817   | 937   | 664   | 788   |
| ube2g2       | 1861  | 1860  | 1377  | 1378  |
| plrg1        | 3813  | 3892  | 2906  | 3273  |
| kntc2l       | 527   | 565   | 523   | 436   |
| nxxl1        | 415   | 421   | 380   | 332   |
| synm         | 10761 | 9578  | 7198  | 7949  |
| zgc-153157   | 916   | 817   | 813   | 715   |
| lama1        | 2977  | 3838  | 2040  | 2960  |
| htra1b       | 3845  | 3662  | 2651  | 3367  |
| rca3         | 7071  | 6788  | 4738  | 4808  |
| hhatla       | 31550 | 30239 | 23081 | 24814 |
| canx         | 28140 | 28576 | 23182 | 24451 |
| acbd7        | 1496  | 1503  | 1365  | 1448  |
| LOC795788    | 2830  | 2616  | 2216  | 2710  |
| tbx24        | 507   | 724   | 412   | 601   |
| lima1        | 2616  | 2878  | 2224  | 2525  |
| smad9        | 6115  | 5916  | 4682  | 5275  |
| capn2b       | 2851  | 2400  | 2204  | 2344  |
| crif1a       | 1416  | 1365  | 1250  | 1380  |
| emilin1a     | 841   | 829   | 673   | 763   |
| cnot6l       | 10823 | 11372 | 8148  | 9408  |
| ccl-c11b     | 942   | 869   | 720   | 764   |
| oxnad1       | 1170  | 1369  | 956   | 1168  |
| ets1a        | 805   | 858   | 682   | 825   |
| LOC100003253 | 43    | 63    | 31    | 62    |
| wu-fd55e03   | 4370  | 4518  | 3287  | 3482  |
| nlg2b        | 5945  | 6101  | 4555  | 4779  |
| ms4a17a.7    | 511   | 543   | 460   | 485   |
| prg4         | 3006  | 2833  | 2129  | 2534  |
| ctn2b        | 33712 | 35137 | 30239 | 32254 |
| inpp1b       | 1813  | 1637  | 1290  | 1403  |
| zgc-136759   | 7105  | 6570  | 4846  | 5067  |
| hadhb        | 10882 | 11297 | 8953  | 8665  |
| fggy         | 6215  | 6848  | 6358  | 6708  |
| igf2r        | 8951  | 10255 | 6159  | 7861  |
| supt3h       | 2464  | 2769  | 2040  | 2379  |
| rab34        | 542   | 541   | 405   | 393   |
| bmp5         | 811   | 838   | 685   | 757   |
| msxe         | 214   | 283   | 292   | 312   |
| insm1a       | 3775  | 4069  | 3547  | 3217  |

|                   |        |        |        |        |
|-------------------|--------|--------|--------|--------|
| kctd7             | 3152   | 2997   | 2342   | 2541   |
| prp19             | 8805   | 9346   | 7067   | 7496   |
| serpind1          | 3233   | 3286   | 2187   | 2545   |
| dtnb              | 4694   | 5537   | 3240   | 3519   |
| ostc              | 1769   | 1850   | 1453   | 1531   |
| zgc-136538        | 5      | 13     | 9      | 12     |
| rasgrp3           | 1644   | 1879   | 1212   | 1235   |
| zwi               | 3405   | 3314   | 2526   | 2788   |
| parvb             | 3924   | 3960   | 3163   | 3316   |
| ugt2b3            | 333    | 357    | 301    | 246    |
| arf6              | 2590   | 2900   | 2330   | 2369   |
| LOC570314         | 3004   | 2991   | 2357   | 2132   |
| cdk11b            | 4806   | 5061   | 3710   | 4095   |
| nom1              | 1051   | 1086   | 682    | 766    |
| smarcd1           | 7817   | 8291   | 7047   | 7409   |
| poc1a             | 142    | 169    | 146    | 111    |
| adi1              | 3274   | 3213   | 2548   | 2816   |
| atp1a1b           | 42409  | 42137  | 31039  | 34168  |
| wdhd1             | 927    | 829    | 696    | 585    |
| runx1             | 410    | 383    | 460    | 435    |
| dram1             | 192    | 177    | 158    | 186    |
| ufsp2             | 3570   | 3482   | 2555   | 3087   |
| LOC798290         | 71     | 47     | 63     | 67     |
| cdk15             | 1767   | 1862   | 1154   | 1475   |
| pskh1             | 638    | 623    | 466    | 609    |
| usp49             | 2754   | 3222   | 2496   | 2692   |
| utp15             | 5566   | 5546   | 4004   | 4843   |
| pou3f2            | 8861   | 8829   | 7045   | 7244   |
| magoh             | 1562   | 1717   | 1269   | 1412   |
| rer1              | 2292   | 2060   | 1680   | 1664   |
| zgc-55813         | 53240  | 48939  | 38723  | 36938  |
| rnasel3           | 560    | 604    | 477    | 375    |
| zgc-64177         | 1235   | 1153   | 1170   | 1294   |
| ethe1             | 3841   | 3666   | 3882   | 3420   |
| grid2             | 6553   | 6859   | 4706   | 4534   |
| snai1b            | 90     | 114    | 128    | 96     |
| tes               | 1592   | 1646   | 1312   | 1291   |
| LOC565256         | 3274   | 3824   | 2416   | 2838   |
| si-ch211-153j24.4 | 25     | 46     | 30     | 33     |
| zgc-162148        | 15342  | 15197  | 12014  | 13393  |
| zgc-64119         | 654    | 592    | 455    | 635    |
| zgc-154071        | 1626   | 1683   | 1335   | 1441   |
| si-dkey-228a15.3  | 643    | 741    | 549    | 572    |
| zgc-163064        | 620    | 593    | 577    | 562    |
| anpep             | 7193   | 6608   | 4584   | 5408   |
| tprb              | 9491   | 10647  | 8459   | 8682   |
| zgc-109868        | 159648 | 150498 | 112695 | 119921 |
| cog2              | 2862   | 2901   | 2179   | 2282   |
| cryz              | 1532   | 1711   | 1293   | 1452   |
| zgc-100817        | 435    | 531    | 380    | 387    |
| zgc-91897         | 3988   | 4199   | 2930   | 3547   |
| zgc-113342        | 246    | 256    | 196    | 242    |

|                  |       |       |       |       |
|------------------|-------|-------|-------|-------|
| hars2            | 1745  | 1824  | 1272  | 1265  |
| gpd1a            | 5411  | 5346  | 4061  | 4026  |
| pls1             | 2704  | 2463  | 1817  | 1973  |
| esf1             | 6932  | 6789  | 4915  | 6138  |
| mboat4           | 130   | 133   | 128   | 93    |
| zgc-163083       | 473   | 451   | 340   | 406   |
| myf5             | 390   | 441   | 280   | 409   |
| ch25hl2          | 382   | 376   | 328   | 445   |
| abcg1            | 11164 | 10596 | 6594  | 7834  |
| cacna2d1a        | 7144  | 7284  | 5246  | 5687  |
| LOC565106        | 2412  | 2438  | 1684  | 1507  |
| zgc-153310       | 1957  | 1584  | 1463  | 1599  |
| zgc-56066        | 1423  | 1809  | 1246  | 1456  |
| zgc-64040        | 1056  | 1076  | 745   | 887   |
| mapkapk2a        | 5170  | 5375  | 3757  | 3800  |
| zgc-171501       | 244   | 320   | 205   | 240   |
| phb2             | 9437  | 10260 | 7109  | 7790  |
| carm1            | 7102  | 7608  | 5587  | 6366  |
| negr1            | 8824  | 9424  | 6514  | 6870  |
| zgc-194659       | 3617  | 2967  | 2546  | 3171  |
| kcnip1b          | 3004  | 3023  | 2290  | 2267  |
| EIF2B3           | 3406  | 3560  | 2623  | 2759  |
| si-dkey-204l11.1 | 38    | 41    | 31    | 44    |
| pnp6             | 1976  | 1896  | 1579  | 1651  |
| selj             | 6142  | 4854  | 3835  | 4931  |
| zgc-123190       | 203   | 314   | 222   | 147   |
| nudc             | 1554  | 1601  | 1132  | 1225  |
| zgc-153018       | 4709  | 4975  | 3796  | 4189  |
| tmed1a           | 470   | 472   | 398   | 406   |
| plekhg7          | 1950  | 1809  | 1335  | 1358  |
| atg4b            | 1876  | 2045  | 1585  | 1637  |
| prdx2            | 52852 | 53359 | 38522 | 38910 |
| pmpcb            | 9802  | 10521 | 7163  | 8700  |
| pfkfb1           | 2383  | 2658  | 1846  | 1956  |
| p2rx7            | 1347  | 1237  | 869   | 875   |
| pfn2l            | 15032 | 16836 | 11891 | 13267 |
| pcmt2            | 3591  | 3240  | 2711  | 2723  |
| pcmt             | 9661  | 9498  | 7457  | 7977  |
| c20orf24         | 4807  | 5003  | 3720  | 4246  |
| prpf40a          | 7620  | 7755  | 5888  | 6883  |
| cplx2l           | 13542 | 13602 | 10079 | 9712  |
| slc6a19a         | 14170 | 12561 | 9977  | 9643  |
| zgc-123047       | 3235  | 3288  | 2830  | 2678  |
| riok2            | 5151  | 5146  | 3916  | 4242  |
| zgc-162964       | 383   | 384   | 326   | 486   |
| vps13a           | 28807 | 29919 | 21450 | 23209 |
| zgc-101847       | 17955 | 19418 | 12877 | 14520 |
| pkp3             | 28630 | 27594 | 23262 | 20399 |
| dnajc15          | 1373  | 1524  | 1016  | 1122  |
| cdc25            | 1144  | 1185  | 980   | 1046  |
| atp1b1b          | 21407 | 20030 | 14466 | 14297 |
| zgc-91887        | 1622  | 1528  | 1127  | 1151  |

|                   |       |       |       |       |
|-------------------|-------|-------|-------|-------|
| zgc-172096        | 1804  | 1960  | 1089  | 1108  |
| dsccl             | 242   | 233   | 170   | 162   |
| zgc-153172        | 2542  | 2523  | 2027  | 2213  |
| tnfaip6           | 426   | 414   | 370   | 495   |
| mfge8a            | 9883  | 9881  | 8086  | 8200  |
| exosc8            | 1362  | 1488  | 1183  | 1397  |
| snai3             | 327   | 315   | 191   | 198   |
| kaza              | 2909  | 2874  | 2108  | 2305  |
| cbln1             | 3458  | 3582  | 2535  | 2763  |
| cacnb4a           | 1499  | 1835  | 961   | 1120  |
| zgc-153675        | 860   | 791   | 950   | 983   |
| acta1a            | 36266 | 35115 | 28538 | 25395 |
| LOC555453         | 15    | 26    | 19    | 18    |
| zgc-154089        | 2725  | 2678  | 2088  | 2112  |
| scel              | 11689 | 11566 | 8928  | 8757  |
| zgc-86723         | 43978 | 41908 | 32357 | 34007 |
| zgc-85932         | 8130  | 7822  | 6632  | 7557  |
| sypl2b            | 774   | 859   | 741   | 771   |
| nsun2             | 3142  | 3291  | 2092  | 2505  |
| zgc-171663        | 636   | 823   | 706   | 684   |
| mpp2b             | 7208  | 7183  | 5252  | 5595  |
| pcsk1             | 13546 | 14889 | 9469  | 10128 |
| dpp6              | 9085  | 9164  | 6749  | 7241  |
| sh3bp4a           | 2267  | 2370  | 1948  | 2107  |
| pomca             | 1304  | 930   | 1014  | 1006  |
| si-dkey-222b8.1   | 3059  | 3743  | 2154  | 2651  |
| ier5l             | 8531  | 8428  | 6869  | 7648  |
| si-ch211-206k20.6 | 2261  | 2207  | 1554  | 1865  |
| ypel3             | 3954  | 3416  | 2539  | 2862  |
| sgk2b             | 2634  | 3348  | 2640  | 1824  |
| ddx1              | 3516  | 3662  | 2659  | 2897  |
| zgc-66127         | 19092 | 18966 | 16838 | 16105 |
| rpf1              | 1485  | 1458  | 1005  | 1054  |
| si-ch211-15d5.2   | 570   | 545   | 450   | 475   |
| tmem178           | 4424  | 4650  | 3426  | 3524  |
| cyp46a1           | 127   | 175   | 97    | 93    |
| tmem22            | 8541  | 8330  | 6279  | 6356  |
| samm50            | 3132  | 3488  | 2450  | 2539  |
| slc13a3           | 1776  | 1458  | 1212  | 1259  |
| zgc-86725         | 34593 | 38023 | 26417 | 26984 |
| arid3b            | 8469  | 8514  | 7378  | 8121  |
| txlnbb            | 47708 | 45317 | 31693 | 39593 |
| aebp2             | 3923  | 4191  | 3193  | 3194  |
| rb1               | 1597  | 1679  | 1119  | 1241  |
| ano2              | 1018  | 1022  | 654   | 701   |
| cx32.2            | 97    | 109   | 91    | 80    |
| slc2a15a          | 410   | 406   | 376   | 418   |
| zgc-163030        | 900   | 929   | 812   | 821   |
| zgc-112242        | 1299  | 1479  | 970   | 1262  |
| slc34a2b          | 6526  | 5052  | 4483  | 5147  |
| kbtbd10b          | 49803 | 48557 | 34078 | 39001 |
| drd4-rs           | 751   | 812   | 600   | 612   |

|                   |        |        |       |       |
|-------------------|--------|--------|-------|-------|
| si-dkey-10o6.2    | 472    | 574    | 419   | 477   |
| capn2a            | 1976   | 1920   | 1614  | 1733  |
| col9a1            | 14967  | 15008  | 14207 | 14783 |
| fmo5              | 2934   | 2964   | 2421  | 2768  |
| rpa2              | 1812   | 1852   | 1548  | 1365  |
| si-ch211-244o22.2 | 560    | 649    | 478   | 470   |
| zgc-153041        | 872    | 1037   | 858   | 724   |
| trap1             | 1471   | 1572   | 1171  | 1436  |
| atp1a3a           | 114243 | 122733 | 88052 | 93236 |
| tmem48            | 3727   | 4037   | 2670  | 3109  |
| kcne4             | 90     | 78     | 110   | 151   |
| loxl5b            | 110    | 99     | 156   | 125   |
| cntn1a            | 8237   | 7951   | 6300  | 7393  |
| rab32a            | 633    | 603    | 462   | 553   |
| c1qtnf5           | 635    | 623    | 532   | 577   |
| nudt5             | 1687   | 1827   | 1414  | 1629  |

| Ethanol-5 | VD-1 | VD-2   | VD-3   | VD-4   |        |
|-----------|------|--------|--------|--------|--------|
| 436       |      | 694    | 11654  | 13963  | 13018  |
| 208       |      | 318    | 3771   | 4302   | 6108   |
| 70        |      | 127    | 3041   | 3753   | 4656   |
| 1514      |      | 10718  | 49454  | 37244  | 31538  |
| 2452      |      | 124    | 540    | 243    | 332    |
| 597       |      | 1939   | 14523  | 13502  | 15900  |
| 9         |      | 34     | 429    | 1818   | 1167   |
| 2343      |      | 1059   | 339    | 317    | 273    |
| 13292     |      | 3275   | 7033   | 3511   | 2547   |
| 5684      |      | 622    | 2617   | 1591   | 1305   |
| 14654     |      | 81693  | 352385 | 277029 | 228432 |
| 51670     |      | 18420  | 18165  | 15419  | 7686   |
| 3751      |      | 6553   | 5062   | 9359   | 13777  |
| 106       |      | 409    | 288    | 552    | 927    |
| 184       |      | 212    | 1013   | 1782   | 1691   |
| 37883     |      | 11236  | 10485  | 8714   | 6720   |
| 364       |      | 782    | 4552   | 4775   | 5951   |
| 2443      |      | 539    | 1636   | 959    | 678    |
| 349403    |      | 129534 | 63906  | 59539  | 51724  |
| 2329      |      | 432    | 728    | 685    | 726    |
| 3165      |      | 4954   | 23545  | 32616  | 35523  |
| 1960      |      | 2743   | 13670  | 15608  | 20028  |
| 880       |      | 1296   | 4930   | 8166   | 8376   |
| 681       |      | 153    | 391    | 162    | 168    |
| 133696    |      | 19685  | 71558  | 38537  | 48658  |
| 301       |      | 598    | 3811   | 5234   | 5186   |
| 43459     |      | 8731   | 22628  | 15940  | 14260  |
| 71834     |      | 29501  | 56975  | 28113  | 22163  |
| 79003     |      | 15089  | 37862  | 26310  | 24029  |
| 1922      |      | 381    | 795    | 642    | 537    |
| 580       |      | 794    | 3375   | 9236   | 4619   |
| 792       |      | 48     | 276    | 129    | 142    |
| 3904      |      | 643    | 2897   | 2402   | 1536   |
| 121936    |      | 21273  | 69303  | 44904  | 46685  |
| 1708      |      | 477    | 796    | 621    | 627    |
| 6928      |      | 1718   | 1128   | 1323   | 937    |
| 33        |      | 57     | 516    | 909    | 792    |
| 901       |      | 143    | 65     | 75     | 33     |
| 2734      |      | 3732   | 17803  | 25077  | 22662  |
| 37428     |      | 7822   | 24231  | 17232  | 17607  |
| 80780     |      | 37692  | 14279  | 13427  | 13379  |
| 347       |      | 509    | 3598   | 4314   | 4612   |
| 721       |      | 1772   | 1935   | 3272   | 2893   |
| 106       |      | 212    | 1528   | 1919   | 2057   |
| 13771     |      | 5427   | 13982  | 7564   | 6957   |
| 6855      |      | 3236   | 4174   | 3099   | 2034   |
| 12205     |      | 6805   | 4711   | 3018   | 2077   |
| 356       |      | 120    | 76     | 25     | 16     |
| 7330      |      | 2093   | 4956   | 4102   | 3026   |
| 243       |      | 28     | 110    | 132    | 91     |
| 890       |      | 2547   | 9578   | 7719   | 6627   |



|        |        |        |        |        |
|--------|--------|--------|--------|--------|
| 47842  | 11416  | 20340  | 16138  | 13994  |
| 2754   | 4760   | 14839  | 15732  | 15420  |
| 13098  | 9417   | 10421  | 5295   | 3423   |
| 691    | 1242   | 6056   | 6156   | 6264   |
| 19     | 21     | 502    | 572    | 584    |
| 4747   | 1256   | 2588   | 2018   | 1470   |
| 30044  | 7005   | 11505  | 8432   | 6831   |
| 435    | 139    | 32     | 26     | 13     |
| 104541 | 49352  | 24117  | 22776  | 21745  |
| 2848   | 4199   | 15622  | 18023  | 17180  |
| 405    | 559    | 4337   | 4271   | 4397   |
| 12722  | 7397   | 12455  | 6137   | 5023   |
| 1576   | 2905   | 7055   | 9582   | 6823   |
| 6579   | 912    | 8000   | 3854   | 3757   |
| 657    | 51     | 382    | 232    | 291    |
| 4165   | 1109   | 1874   | 1539   | 1177   |
| 14944  | 107460 | 196335 | 142072 | 140608 |
| 1165   | 1520   | 6817   | 7183   | 6166   |
| 3421   | 987    | 1280   | 1101   | 895    |
| 1590   | 258    | 584    | 483    | 455    |
| 5886   | 1556   | 2157   | 1936   | 1540   |
| 616    | 42     | 112    | 115    | 111    |
| 151    | 181    | 3009   | 2553   | 1795   |
| 784    | 1235   | 693    | 995    | 1416   |
| 490    | 1009   | 2329   | 2749   | 2840   |
| 129    | 426    | 487    | 1708   | 829    |
| 387    | 139    | 33     | 25     | 12     |
| 3356   | 1011   | 1295   | 1140   | 896    |
| 3621   | 1036   | 1373   | 1235   | 981    |
| 2505   | 2213   | 1079   | 549    | 390    |
| 1009   | 2802   | 17114  | 13593  | 11219  |
| 3291   | 987    | 1258   | 1095   | 881    |
| 119    | 91     | 991    | 728    | 1559   |
| 3266   | 1151   | 1131   | 923    | 927    |
| 3893   | 1127   | 1479   | 1276   | 999    |
| 669    | 1499   | 4359   | 3954   | 3387   |
| 732    | 1527   | 5485   | 4712   | 3788   |
| 15105  | 4440   | 7271   | 6381   | 4789   |
| 2655   | 731    | 1927   | 1263   | 1014   |
| 257    | 168    | 246    | 260    | 307    |
| 813    | 229    | 253    | 232    | 240    |
| 246    | 167    | 250    | 257    | 309    |
| 168003 | 39272  | 167469 | 104777 | 120536 |
| 648    | 702    | 4998   | 5136   | 5416   |
| 571    | 3040   | 11706  | 13995  | 6819   |
| 550    | 147    | 331    | 224    | 121    |
| 1518   | 1985   | 10048  | 12196  | 10018  |
| 17304  | 19726  | 45210  | 58767  | 53447  |
| 2264   | 2327   | 3258   | 1118   | 717    |
| 9322   | 8898   | 9476   | 4453   | 3270   |
| 1982   | 1252   | 10774  | 10429  | 9639   |
| 112977 | 26701  | 116905 | 73161  | 67991  |

|        |        |         |        |        |
|--------|--------|---------|--------|--------|
| 76     | 92     | 641     | 861    | 856    |
| 13122  | 16105  | 12048   | 3936   | 3169   |
| 6906   | 5835   | 10010   | 4896   | 3566   |
| 1326   | 975    | 7176    | 6976   | 6486   |
| 2398   | 1624   | 3100    | 2348   | 1747   |
| 181    | 268    | 1018    | 1394   | 1529   |
| 8470   | 10174  | 31939   | 38936  | 40396  |
| 725    | 413    | 1381    | 3202   | 1883   |
| 109052 | 77500  | 186050  | 169145 | 81071  |
| 518    | 129    | 281     | 194    | 198    |
| 4439   | 2167   | 3407    | 2684   | 2132   |
| 5380   | 1623   | 4188    | 3096   | 2316   |
| 3667   | 6582   | 23134   | 24860  | 24349  |
| 253    | 486    | 1583    | 1570   | 1679   |
| 27573  | 28085  | 21207   | 7947   | 6468   |
| 330    | 452    | 2532    | 2816   | 2850   |
| 197    | 217    | 751     | 2445   | 1288   |
| 3608   | 6162   | 26525   | 31232  | 28006  |
| 250    | 906    | 1566    | 1683   | 1604   |
| 3476   | 3768   | 14772   | 16287  | 15624  |
| 78001  | 28124  | 55170   | 48198  | 35876  |
| 10162  | 2322   | 9091    | 6242   | 6341   |
| 2      | 82     | 356     | 441    | 259    |
| 15110  | 9087   | 21102   | 12991  | 9626   |
| 653    | 1380   | 4349    | 4803   | 2989   |
| 3577   | 2405   | 9678    | 6138   | 3561   |
| 4177   | 1459   | 1371    | 1872   | 1345   |
| 143    | 190    | 883     | 1181   | 1320   |
| 6576   | 1529   | 6649    | 4755   | 3631   |
| 3087   | 975    | 3989    | 3424   | 2392   |
| 1      | 13     | 250     | 242    | 157    |
| 1279   | 418    | 611     | 616    | 358    |
| 575    | 204    | 263     | 208    | 152    |
| 3012   | 3148   | 7445    | 8627   | 7854   |
| 61288  | 16542  | 14328   | 20739  | 14073  |
| 15712  | 15724  | 28270   | 25357  | 31948  |
| 764    | 28     | 1298    | 750    | 436    |
| 22     | 189    | 457     | 551    | 361    |
| 2348   | 1080   | 968     | 904    | 891    |
| 13307  | 6964   | 14440   | 10594  | 7790   |
| 1642   | 1107   | 2250    | 1166   | 971    |
| 1334   | 1632   | 8251    | 7821   | 7154   |
| 27668  | 22758  | 36820   | 20243  | 13466  |
| 28     | 98     | 550     | 511    | 407    |
| 1287   | 2632   | 9666    | 10328  | 8719   |
| 849    | 288    | 640     | 404    | 287    |
| 763442 | 489474 | 1088990 | 799731 | 556169 |
| 6525   | 3186   | 5174    | 3561   | 2730   |
| 5598   | 6096   | 14005   | 17566  | 14541  |
| 2502   | 1568   | 3526    | 3115   | 1966   |
| 731    | 296    | 480     | 482    | 418    |
| 80428  | 22858  | 84193   | 55431  | 62698  |

|       |       |       |       |       |
|-------|-------|-------|-------|-------|
| 3263  | 1421  | 2320  | 2343  | 2245  |
| 1279  | 1065  | 1926  | 1066  | 721   |
| 8376  | 3786  | 9074  | 7489  | 6843  |
| 5840  | 3528  | 8346  | 6020  | 5003  |
| 758   | 687   | 924   | 479   | 400   |
| 1266  | 360   | 769   | 670   | 527   |
| 73812 | 38589 | 78446 | 58444 | 41363 |
| 635   | 53    | 523   | 385   | 415   |
| 1820  | 495   | 1846  | 1415  | 1333  |
| 5652  | 7918  | 26489 | 38082 | 32402 |
| 5689  | 1673  | 4451  | 3542  | 2610  |
| 1639  | 3359  | 17981 | 14150 | 10483 |
| 889   | 1081  | 3678  | 5167  | 3353  |
| 3170  | 1544  | 2622  | 2079  | 1820  |
| 4445  | 935   | 2204  | 2254  | 2496  |
| 3277  | 4682  | 16953 | 19850 | 17077 |
| 502   | 92    | 393   | 386   | 322   |
| 3339  | 3335  | 4048  | 1952  | 1509  |
| 25005 | 16142 | 27298 | 17402 | 10410 |
| 1876  | 4700  | 13665 | 9659  | 8424  |
| 4713  | 6001  | 22397 | 23112 | 21547 |
| 363   | 153   | 402   | 300   | 192   |
| 503   | 864   | 1977  | 1962  | 1902  |
| 642   | 171   | 446   | 300   | 354   |
| 10910 | 10845 | 7168  | 7134  | 9123  |
| 31981 | 12492 | 16743 | 14096 | 11126 |
| 665   | 1169  | 3559  | 4097  | 3399  |
| 21912 | 19163 | 32350 | 19126 | 13888 |
| 384   | 58    | 246   | 300   | 243   |
| 1576  | 1007  | 1764  | 999   | 668   |
| 194   | 149   | 251   | 119   | 86    |
| 10659 | 2634  | 17027 | 10974 | 11430 |
| 713   | 1358  | 3598  | 4106  | 3252  |
| 2004  | 2872  | 9748  | 9586  | 9264  |
| 894   | 539   | 1539  | 900   | 749   |
| 2677  | 6826  | 44005 | 36194 | 28168 |
| 727   | 10321 | 2194  | 1322  | 2151  |
| 2717  | 840   | 2066  | 2038  | 1525  |
| 501   | 979   | 5656  | 6161  | 5842  |
| 800   | 1712  | 3848  | 3509  | 3267  |
| 13089 | 13389 | 19352 | 10719 | 9220  |
| 2700  | 3231  | 3402  | 4101  | 5473  |
| 2612  | 668   | 1623  | 1257  | 1010  |
| 2066  | 1617  | 3343  | 9461  | 2988  |
| 36933 | 40199 | 62609 | 37976 | 25092 |
| 70274 | 48105 | 66130 | 46545 | 36965 |
| 48470 | 19536 | 48401 | 34651 | 24842 |
| 1018  | 322   | 1049  | 818   | 512   |
| 10489 | 12063 | 27547 | 32682 | 34311 |
| 14686 | 8532  | 9240  | 10835 | 6005  |
| 14126 | 9168  | 19524 | 12971 | 10750 |
| 4670  | 1608  | 5865  | 4209  | 2858  |

|        |        |        |        |        |
|--------|--------|--------|--------|--------|
| 44095  | 46895  | 76220  | 49284  | 30299  |
| 2219   | 1854   | 3457   | 1866   | 1456   |
| 7550   | 4504   | 6463   | 5094   | 4535   |
| 4056   | 3564   | 4395   | 3258   | 2812   |
| 68196  | 16399  | 70789  | 46208  | 49521  |
| 426692 | 151597 | 612013 | 425190 | 436494 |
| 2868   | 1129   | 1545   | 1213   | 1047   |
| 2743   | 999    | 2786   | 1979   | 1539   |
| 2131   | 2094   | 4180   | 4946   | 4004   |
| 430    | 430    | 710    | 310    | 211    |
| 1201   | 804    | 1963   | 1084   | 847    |
| 38     | 47     | 587    | 367    | 349    |
| 297    | 343    | 217    | 100    | 47     |
| 14908  | 4398   | 21160  | 13882  | 14078  |
| 318806 | 104682 | 442192 | 282138 | 308279 |
| 3171   | 5936   | 18289  | 16729  | 13200  |
| 1925   | 1318   | 2327   | 1832   | 1409   |
| 206    | 378    | 1345   | 1485   | 1164   |
| 1120   | 275    | 665    | 544    | 452    |
| 1154   | 489    | 854    | 770    | 720    |
| 3512   | 2051   | 2841   | 2155   | 1360   |
| 3626   | 1684   | 3436   | 3174   | 2089   |
| 3479   | 1264   | 3868   | 2888   | 2159   |
| 383    | 404    | 267    | 117    | 81     |
| 4869   | 1208   | 2708   | 1965   | 1554   |
| 2220   | 431    | 1763   | 1375   | 983    |
| 37380  | 23708  | 62961  | 44574  | 28096  |
| 757    | 142    | 630    | 439    | 306    |
| 567    | 146    | 463    | 226    | 243    |
| 104    | 275    | 719    | 750    | 758    |
| 49429  | 32806  | 79430  | 56035  | 37241  |
| 2177   | 1900   | 4126   | 2174   | 1352   |
| 265    | 474    | 2047   | 1854   | 1495   |
| 795    | 187    | 416    | 338    | 256    |
| 4050   | 7819   | 19218  | 16607  | 14509  |
| 1103   | 626    | 1127   | 842    | 763    |
| 410    | 1091   | 3626   | 2883   | 2200   |
| 9793   | 3518   | 12054  | 9087   | 7012   |
| 81930  | 40011  | 75121  | 54377  | 30286  |
| 17154  | 8812   | 27643  | 22683  | 18443  |
| 7977   | 6718   | 11600  | 8471   | 9325   |
| 915    | 1254   | 4896   | 5432   | 4101   |
| 542    | 739    | 758    | 339    | 196    |
| 150427 | 87259  | 341853 | 279504 | 195252 |
| 4580   | 2914   | 6614   | 5586   | 3988   |
| 521    | 320    | 709    | 845    | 641    |
| 3172   | 1340   | 2483   | 2194   | 1934   |
| 2216   | 4184   | 16123  | 12069  | 10787  |
| 6958   | 4634   | 13731  | 8133   | 5944   |
| 927    | 579    | 1189   | 838    | 534    |
| 1093   | 537    | 947    | 821    | 530    |
| 415067 | 158358 | 532426 | 356418 | 390372 |

|        |       |        |        |        |
|--------|-------|--------|--------|--------|
| 1224   | 461   | 1206   | 1115   | 960    |
| 1660   | 1583  | 7316   | 7689   | 6435   |
| 3933   | 1920  | 4681   | 3542   | 2995   |
| 5579   | 1898  | 3302   | 2459   | 2728   |
| 1346   | 920   | 1129   | 730    | 634    |
| 2963   | 2879  | 2968   | 2229   | 1627   |
| 6319   | 3103  | 5805   | 4866   | 3453   |
| 519    | 1085  | 3016   | 3298   | 3644   |
| 1501   | 1724  | 6707   | 6929   | 6621   |
| 1096   | 518   | 961    | 864    | 620    |
| 8026   | 4185  | 7194   | 5328   | 3947   |
| 2431   | 5389  | 19404  | 24624  | 17581  |
| 6110   | 2647  | 7997   | 6009   | 4821   |
| 17138  | 21588 | 88037  | 90133  | 80652  |
| 2532   | 2776  | 5398   | 2932   | 2368   |
| 1670   | 1718  | 4425   | 2746   | 2068   |
| 1763   | 937   | 2726   | 1958   | 1482   |
| 358    | 113   | 586    | 389    | 289    |
| 4564   | 8247  | 24450  | 20431  | 17662  |
| 7240   | 3622  | 6626   | 5646   | 3977   |
| 3576   | 1794  | 2133   | 1425   | 1192   |
| 1297   | 497   | 1228   | 895    | 828    |
| 13083  | 5315  | 10883  | 9407   | 8817   |
| 1243   | 288   | 1238   | 954    | 922    |
| 56     | 90    | 255    | 143    | 124    |
| 39     | 2     | 185    | 192    | 271    |
| 2348   | 5256  | 18745  | 23920  | 16984  |
| 1868   | 1591  | 2280   | 1980   | 1447   |
| 464    | 960   | 2160   | 2009   | 1632   |
| 166970 | 66810 | 285754 | 233580 | 129921 |
| 20378  | 18953 | 62108  | 67551  | 72208  |
| 2693   | 3922  | 14314  | 14605  | 9592   |
| 3134   | 3871  | 12477  | 12048  | 11074  |
| 1796   | 634   | 1680   | 1331   | 899    |
| 879    | 1099  | 1558   | 1698   | 1714   |
| 2090   | 1108  | 2632   | 2013   | 1607   |
| 423    | 627   | 2043   | 2322   | 1850   |
| 20969  | 14320 | 44081  | 37445  | 25515  |
| 66     | 93    | 59     | 73     | 216    |
| 4533   | 2457  | 4924   | 3903   | 3072   |
| 56955  | 19239 | 89217  | 57253  | 55417  |
| 542    | 358   | 397    | 513    | 243    |
| 3993   | 1604  | 3279   | 2633   | 2224   |
| 12070  | 6678  | 10768  | 8177   | 6420   |
| 3217   | 3569  | 12270  | 15206  | 15212  |
| 22734  | 17971 | 29312  | 18920  | 13214  |
| 1858   | 4558  | 7022   | 5249   | 5009   |
| 2727   | 1138  | 2946   | 2364   | 1948   |
| 102    | 146   | 447    | 761    | 441    |
| 151    | 103   | 546    | 854    | 918    |
| 1650   | 511   | 1473   | 1234   | 1035   |
| 2891   | 1487  | 2743   | 2296   | 2008   |

|       |       |       |       |       |
|-------|-------|-------|-------|-------|
| 8197  | 13856 | 49754 | 47804 | 37850 |
| 1402  | 924   | 1221  | 567   | 410   |
| 21449 | 12023 | 14631 | 10598 | 8529  |
| 4155  | 2444  | 5415  | 4039  | 3283  |
| 2817  | 667   | 3401  | 2563  | 2005  |
| 1751  | 569   | 1738  | 1246  | 1052  |
| 2290  | 1472  | 4834  | 3049  | 2102  |
| 101   | 169   | 788   | 835   | 528   |
| 518   | 351   | 703   | 540   | 360   |
| 314   | 540   | 1409  | 1394  | 1540  |
| 677   | 202   | 561   | 449   | 373   |
| 1083  | 1455  | 4780  | 4568  | 4479  |
| 14526 | 18484 | 69723 | 69433 | 56942 |
| 352   | 424   | 1393  | 1543  | 1758  |
| 732   | 2996  | 13951 | 11354 | 8859  |
| 2788  | 1721  | 3831  | 2888  | 2452  |
| 11473 | 15100 | 56904 | 58585 | 54893 |
| 6760  | 6523  | 9146  | 5773  | 4113  |
| 1789  | 1655  | 3360  | 2396  | 1855  |
| 9821  | 4058  | 28249 | 19318 | 14409 |
| 277   | 64    | 147   | 117   | 79    |
| 3561  | 5214  | 12614 | 11460 | 9859  |
| 10344 | 3518  | 9096  | 11098 | 8415  |
| 154   | 111   | 343   | 145   | 103   |
| 1816  | 1362  | 6069  | 4607  | 2975  |
| 3653  | 3306  | 4471  | 2464  | 2123  |
| 3720  | 1624  | 5384  | 4249  | 3580  |
| 2438  | 3690  | 10539 | 9097  | 7624  |
| 9457  | 4916  | 8999  | 6444  | 5376  |
| 7353  | 5951  | 17407 | 11755 | 8130  |
| 7204  | 2857  | 5600  | 4846  | 3912  |
| 1900  | 1866  | 3590  | 2313  | 1385  |
| 4644  | 3782  | 3010  | 3257  | 4461  |
| 1346  | 1929  | 5226  | 5158  | 4763  |
| 3246  | 3462  | 10431 | 6921  | 4974  |
| 429   | 577   | 2205  | 2404  | 2135  |
| 1845  | 1954  | 3164  | 1810  | 987   |
| 63363 | 35329 | 84825 | 68421 | 48732 |
| 506   | 175   | 336   | 279   | 282   |
| 7881  | 3053  | 12806 | 9798  | 7204  |
| 2365  | 2566  | 7371  | 4910  | 3469  |
| 423   | 216   | 348   | 342   | 204   |
| 228   | 90    | 249   | 101   | 87    |
| 31686 | 30373 | 46566 | 33773 | 49654 |
| 12299 | 4470  | 13798 | 10166 | 7396  |
| 3100  | 2808  | 4446  | 5646  | 4804  |
| 823   | 1318  | 1408  | 3373  | 1424  |
| 1986  | 2945  | 11602 | 12806 | 9783  |
| 4645  | 1519  | 4217  | 3757  | 2808  |
| 43052 | 25872 | 53369 | 42485 | 31070 |
| 1572  | 1899  | 8488  | 7082  | 5741  |
| 6472  | 3024  | 7494  | 5336  | 4050  |

|        |        |       |       |       |
|--------|--------|-------|-------|-------|
| 25584  | 24095  | 39148 | 28708 | 41854 |
| 339    | 152    | 418   | 293   | 204   |
| 718    | 270    | 668   | 580   | 516   |
| 1443   | 1957   | 6296  | 6703  | 6567  |
| 3393   | 2212   | 5706  | 4494  | 3951  |
| 55     | 50     | 130   | 205   | 350   |
| 11721  | 7177   | 13320 | 10358 | 8541  |
| 114    | 61     | 168   | 75    | 47    |
| 17650  | 32735  | 80028 | 62007 | 60526 |
| 1367   | 919    | 1931  | 1225  | 1452  |
| 1359   | 2144   | 3719  | 3211  | 3981  |
| 2848   | 3697   | 11798 | 11689 | 10357 |
| 538    | 742    | 1544  | 2920  | 981   |
| 1599   | 1694   | 6178  | 6572  | 5277  |
| 213    | 189    | 300   | 145   | 74    |
| 1959   | 1266   | 3069  | 2467  | 1679  |
| 10952  | 10947  | 34918 | 37894 | 34439 |
| 1389   | 690    | 1759  | 1356  | 882   |
| 746    | 1724   | 2742  | 2082  | 2028  |
| 350    | 472    | 1929  | 3110  | 1673  |
| 483    | 675    | 1445  | 1502  | 1254  |
| 1418   | 1609   | 2169  | 1308  | 1535  |
| 47     | 18     | 23    | 6     | 12    |
| 5606   | 3680   | 6471  | 4774  | 3820  |
| 2380   | 1369   | 2265  | 1726  | 1310  |
| 2971   | 1423   | 1831  | 1808  | 1350  |
| 1586   | 1152   | 2502  | 1930  | 1393  |
| 7949   | 4853   | 4015  | 3299  | 2068  |
| 310    | 99     | 163   | 137   | 138   |
| 946    | 270    | 856   | 641   | 694   |
| 10831  | 14266  | 54503 | 48575 | 44862 |
| 687    | 815    | 4718  | 4550  | 3548  |
| 622    | 1018   | 2599  | 1974  | 1655  |
| 1276   | 384    | 1239  | 910   | 642   |
| 21631  | 9978   | 30961 | 20040 | 11494 |
| 2358   | 1040   | 2260  | 2064  | 1657  |
| 1051   | 1357   | 5268  | 5325  | 4942  |
| 1064   | 402    | 1102  | 946   | 804   |
| 4357   | 6241   | 19930 | 17318 | 14059 |
| 3404   | 4465   | 8608  | 7696  | 6748  |
| 851    | 1173   | 2598  | 2549  | 1997  |
| 1094   | 1515   | 5719  | 5266  | 4603  |
| 1262   | 1096   | 2445  | 1131  | 942   |
| 2002   | 2602   | 4568  | 4221  | 5670  |
| 8263   | 11527  | 61010 | 52628 | 52483 |
| 138212 | 101830 | 95246 | 71578 | 52369 |
| 306    | 552    | 1294  | 2547  | 1038  |
| 1587   | 1471   | 2300  | 1283  | 890   |
| 349    | 335    | 2136  | 2519  | 1696  |
| 3882   | 2257   | 4528  | 3121  | 2767  |
| 20714  | 27241  | 93908 | 99066 | 91070 |
| 966    | 424    | 858   | 730   | 504   |

|        |        |        |        |        |
|--------|--------|--------|--------|--------|
| 183    | 555    | 2122   | 1647   | 1241   |
| 719    | 657    | 1143   | 719    | 409    |
| 2314   | 3029   | 11043  | 9579   | 10439  |
| 1393   | 1730   | 3973   | 3945   | 4012   |
| 821    | 399    | 2221   | 3138   | 2563   |
| 943    | 1280   | 4269   | 4313   | 3553   |
| 73     | 173    | 752    | 663    | 483    |
| 510979 | 373773 | 815749 | 653068 | 432949 |
| 991    | 626    | 1453   | 1058   | 729    |
| 12062  | 12029  | 21442  | 11939  | 8318   |
| 12411  | 18614  | 53327  | 68007  | 61213  |
| 2556   | 2770   | 3646   | 2328   | 1676   |
| 23212  | 8049   | 16666  | 13029  | 10690  |
| 1149   | 2100   | 5300   | 5592   | 4719   |
| 28632  | 19791  | 35784  | 27667  | 24848  |
| 4354   | 2311   | 4723   | 3927   | 2670   |
| 166    | 142    | 969    | 1021   | 973    |
| 10261  | 14657  | 31677  | 40863  | 30553  |
| 695    | 208    | 427    | 312    | 339    |
| 149    | 139    | 625    | 634    | 581    |
| 1090   | 639    | 2465   | 1896   | 1816   |
| 6903   | 4738   | 9525   | 8010   | 5580   |
| 2346   | 1197   | 5043   | 3540   | 3966   |
| 161978 | 64011  | 223130 | 158775 | 175144 |
| 9086   | 10219  | 25968  | 25266  | 23715  |
| 100    | 142    | 964    | 733    | 634    |
| 5601   | 3427   | 3152   | 2767   | 2517   |
| 93     | 172    | 1010   | 716    | 614    |
| 678    | 182    | 495    | 442    | 356    |
| 803    | 1070   | 4279   | 4760   | 3921   |
| 1551   | 1160   | 3336   | 2070   | 1948   |
| 1747   | 892    | 2673   | 1876   | 1876   |
| 856    | 1332   | 4347   | 5682   | 3798   |
| 24729  | 7863   | 65789  | 43178  | 40912  |
| 1465   | 636    | 2136   | 1539   | 1178   |
| 6503   | 2176   | 3662   | 4686   | 2925   |
| 1743   | 1322   | 2676   | 1855   | 1566   |
| 436    | 109    | 398    | 234    | 298    |
| 8973   | 3480   | 11634  | 7724   | 6433   |
| 569    | 88     | 799    | 665    | 618    |
| 876    | 284    | 642    | 454    | 339    |
| 24840  | 15750  | 26430  | 23008  | 18497  |
| 2436   | 1650   | 4650   | 3011   | 2573   |
| 2669   | 1653   | 2235   | 1790   | 1415   |
| 203    | 203    | 281    | 242    | 283    |
| 1005   | 1294   | 5018   | 4825   | 3645   |
| 16512  | 53721  | 102364 | 80097  | 65550  |
| 3217   | 4057   | 15531  | 15725  | 18045  |
| 571    | 321    | 608    | 472    | 427    |
| 261    | 281    | 1204   | 1692   | 1247   |
| 12398  | 14613  | 38251  | 57053  | 46574  |
| 789    | 1804   | 3923   | 3303   | 2775   |



|        |        |        |        |        |
|--------|--------|--------|--------|--------|
| 1407   | 1299   | 2240   | 2124   | 1495   |
| 318    | 327    | 393    | 660    | 482    |
| 4647   | 5644   | 17323  | 13447  | 7186   |
| 305    | 233    | 804    | 436    | 395    |
| 1757   | 2184   | 4484   | 5122   | 3878   |
| 1235   | 554    | 1460   | 1092   | 911    |
| 422    | 728    | 2518   | 2493   | 2025   |
| 178    | 238    | 183    | 737    | 100    |
| 427519 | 196423 | 773747 | 526842 | 567639 |
| 2299   | 1389   | 3320   | 2662   | 2041   |
| 12828  | 6523   | 21802  | 12595  | 7315   |
| 403    | 310    | 1011   | 752    | 719    |
| 12308  | 10043  | 24402  | 17695  | 13308  |
| 666    | 1197   | 3801   | 3816   | 4131   |
| 1351   | 1087   | 2242   | 1871   | 1443   |
| 17     | 136    | 220    | 148    | 102    |
| 22     | 22     | 94     | 37     | 19     |
| 2075   | 2909   | 7918   | 7635   | 7183   |
| 1486   | 494    | 1079   | 943    | 648    |
| 697    | 582    | 1211   | 831    | 482    |
| 1015   | 1356   | 5466   | 5413   | 3906   |
| 2201   | 1072   | 2401   | 1625   | 1719   |
| 1168   | 316    | 761    | 568    | 440    |
| 632    | 496    | 2392   | 2305   | 1870   |
| 460    | 148    | 475    | 430    | 304    |
| 985    | 545    | 914    | 720    | 564    |
| 708    | 807    | 2347   | 2852   | 2217   |
| 1458   | 963    | 3287   | 2464   | 1866   |
| 30     | 61     | 301    | 351    | 307    |
| 4201   | 3070   | 5217   | 4847   | 3609   |
| 427    | 259    | 421    | 316    | 321    |
| 137    | 65     | 85     | 67     | 74     |
| 1174   | 821    | 1410   | 1189   | 859    |
| 800    | 505    | 791    | 776    | 705    |
| 409    | 546    | 1597   | 1583   | 1632   |
| 1590   | 1887   | 9714   | 10077  | 7305   |
| 2986   | 1014   | 1524   | 1146   | 1033   |
| 888    | 2013   | 7472   | 4761   | 4331   |
| 6026   | 4112   | 6479   | 5572   | 4592   |
| 1577   | 1719   | 6769   | 5824   | 5214   |
| 1733   | 3113   | 9502   | 6574   | 5758   |
| 339    | 593    | 678    | 1058   | 465    |
| 1067   | 1006   | 979    | 641    | 487    |
| 1179   | 747    | 2043   | 1349   | 1568   |
| 193    | 193    | 257    | 178    | 92     |
| 5810   | 9444   | 20913  | 20590  | 22556  |
| 103    | 163    | 693    | 573    | 469    |
| 1992   | 3425   | 8157   | 7418   | 5251   |
| 6847   | 9459   | 32814  | 32855  | 29674  |
| 3438   | 4810   | 15336  | 15112  | 13800  |
| 354    | 145    | 555    | 347    | 299    |
| 5581   | 8979   | 23094  | 22687  | 20308  |

|       |       |       |       |       |
|-------|-------|-------|-------|-------|
| 1568  | 2186  | 7393  | 8030  | 5264  |
| 309   | 190   | 939   | 594   | 321   |
| 2591  | 9115  | 22578 | 14922 | 12423 |
| 184   | 229   | 841   | 696   | 974   |
| 2860  | 1030  | 2260  | 2010  | 1694  |
| 891   | 1239  | 2168  | 1950  | 1669  |
| 1021  | 408   | 1177  | 962   | 658   |
| 14512 | 17073 | 52271 | 51496 | 47026 |
| 8103  | 7687  | 8513  | 6951  | 5481  |
| 1540  | 1680  | 6077  | 6188  | 5330  |
| 1697  | 1330  | 2167  | 1998  | 1309  |
| 782   | 999   | 3182  | 3148  | 2629  |
| 1275  | 1398  | 2686  | 1707  | 1071  |
| 347   | 367   | 609   | 367   | 306   |
| 3816  | 2021  | 5377  | 3842  | 2909  |
| 2503  | 1344  | 3421  | 2288  | 1959  |
| 6803  | 6705  | 20468 | 13523 | 7752  |
| 275   | 366   | 1380  | 1115  | 865   |
| 503   | 272   | 620   | 454   | 404   |
| 1790  | 2874  | 6540  | 5954  | 4454  |
| 97    | 112   | 669   | 685   | 587   |
| 156   | 62    | 152   | 188   | 120   |
| 3052  | 3717  | 10993 | 7425  | 4371  |
| 1658  | 674   | 2541  | 1900  | 1241  |
| 7252  | 7172  | 25412 | 23918 | 20472 |
| 2101  | 1855  | 2525  | 2259  | 1859  |
| 11198 | 7525  | 16035 | 12570 | 9916  |
| 5582  | 7143  | 18458 | 16695 | 14894 |
| 516   | 172   | 561   | 415   | 258   |
| 5192  | 8846  | 19084 | 13331 | 14161 |
| 420   | 240   | 204   | 132   | 144   |
| 276   | 149   | 503   | 389   | 349   |
| 851   | 370   | 704   | 549   | 469   |
| 1017  | 468   | 1185  | 897   | 734   |
| 2135  | 1742  | 2154  | 1852  | 1840  |
| 1673  | 1899  | 5268  | 4822  | 3764  |
| 1591  | 802   | 1444  | 1126  | 891   |
| 96    | 102   | 298   | 246   | 136   |
| 31732 | 17058 | 29171 | 23741 | 17575 |
| 1226  | 448   | 908   | 726   | 513   |
| 1023  | 1649  | 1708  | 725   | 683   |
| 461   | 628   | 1710  | 1982  | 1486  |
| 5459  | 2030  | 5916  | 5202  | 4027  |
| 15245 | 26517 | 57119 | 57058 | 45082 |
| 4192  | 2443  | 8295  | 6537  | 5040  |
| 526   | 858   | 2581  | 2297  | 1810  |
| 32251 | 46108 | 94559 | 81465 | 75190 |
| 272   | 77    | 234   | 177   | 152   |
| 4     | 0     | 10    | 5     | 6     |
| 1014  | 525   | 1179  | 1141  | 588   |
| 117   | 119   | 847   | 658   | 644   |
| 316   | 485   | 1293  | 1279  | 1218  |

|        |        |        |        |        |
|--------|--------|--------|--------|--------|
| 738    | 1077   | 3088   | 4017   | 3811   |
| 929    | 828    | 1463   | 1144   | 1105   |
| 1115   | 338    | 360    | 348    | 285    |
| 46203  | 32962  | 73813  | 56006  | 47051  |
| 67508  | 54163  | 127391 | 105771 | 74206  |
| 4990   | 5492   | 16428  | 16308  | 13428  |
| 555    | 1134   | 2543   | 2467   | 1947   |
| 464    | 263    | 356    | 217    | 155    |
| 43480  | 39454  | 77954  | 62588  | 41129  |
| 2106   | 1031   | 1644   | 1487   | 1173   |
| 1766   | 1191   | 2857   | 2061   | 1314   |
| 3754   | 3031   | 15467  | 15559  | 15072  |
| 10004  | 8059   | 25010  | 16353  | 11437  |
| 674    | 994    | 1401   | 1179   | 1049   |
| 1305   | 1528   | 4886   | 4881   | 4241   |
| 125    | 19     | 165    | 115    | 31     |
| 1632   | 2097   | 8138   | 8313   | 6139   |
| 670    | 526    | 633    | 457    | 352    |
| 2269   | 3168   | 6837   | 5787   | 5031   |
| 640    | 754    | 1621   | 1863   | 1511   |
| 2104   | 3389   | 5068   | 4523   | 4964   |
| 73     | 50     | 126    | 89     | 69     |
| 5832   | 7307   | 27351  | 22172  | 17513  |
| 349139 | 315565 | 617610 | 454050 | 312941 |
| 123    | 21     | 155    | 119    | 45     |
| 18258  | 24058  | 16447  | 16340  | 12329  |
| 3027   | 3728   | 7707   | 7197   | 5748   |
| 817    | 795    | 2527   | 2687   | 2139   |
| 479    | 232    | 255    | 172    | 181    |
| 5207   | 5973   | 19336  | 19481  | 18793  |
| 7997   | 7612   | 31375  | 29387  | 27545  |
| 995    | 1196   | 2882   | 3375   | 2823   |
| 173    | 193    | 954    | 889    | 689    |
| 683    | 300    | 939    | 718    | 599    |
| 2659   | 3554   | 7496   | 6412   | 5961   |
| 11159  | 4499   | 12961  | 11450  | 8995   |
| 13800  | 13364  | 24338  | 26557  | 21212  |
| 1242   | 676    | 1937   | 1361   | 918    |
| 264    | 239    | 772    | 783    | 646    |
| 16899  | 7640   | 22419  | 16782  | 12408  |
| 1084   | 1035   | 2450   | 1507   | 1436   |
| 254    | 102    | 186    | 208    | 144    |
| 632    | 964    | 2803   | 2425   | 1944   |
| 1019   | 1314   | 3907   | 4698   | 4233   |
| 887    | 1140   | 3545   | 3233   | 2738   |
| 2053   | 2435   | 7577   | 6573   | 4017   |
| 224    | 243    | 637    | 1313   | 474    |
| 919    | 536    | 1726   | 1353   | 1036   |
| 952    | 1140   | 3288   | 3403   | 3201   |
| 7598   | 5216   | 12469  | 10018  | 7110   |
| 337    | 357    | 629    | 516    | 428    |
| 201    | 29     | 67     | 79     | 93     |

|        |        |        |        |        |
|--------|--------|--------|--------|--------|
| 2704   | 3095   | 12993  | 11467  | 8534   |
| 812    | 864    | 3694   | 3301   | 2686   |
| 1379   | 1306   | 2564   | 1762   | 1509   |
| 3737   | 11978  | 36332  | 27427  | 18806  |
| 2359   | 2587   | 9614   | 9952   | 6955   |
| 920    | 592    | 3109   | 2026   | 1553   |
| 592    | 145    | 847    | 773    | 530    |
| 79     | 204    | 694    | 636    | 475    |
| 445    | 294    | 567    | 444    | 309    |
| 1113   | 688    | 1021   | 786    | 414    |
| 1982   | 2349   | 8652   | 8314   | 6599   |
| 12649  | 16869  | 64690  | 68058  | 50704  |
| 4168   | 5026   | 11191  | 10330  | 10096  |
| 5844   | 3856   | 8764   | 6587   | 3741   |
| 1736   | 1697   | 4973   | 5381   | 4812   |
| 2053   | 2518   | 13113  | 13209  | 11776  |
| 18665  | 9116   | 15055  | 11714  | 10549  |
| 3085   | 3861   | 9918   | 8589   | 6733   |
| 981    | 1325   | 4093   | 3233   | 2787   |
| 6608   | 5265   | 8818   | 7736   | 7011   |
| 5937   | 7576   | 28944  | 30578  | 30042  |
| 3067   | 3517   | 8197   | 7718   | 6766   |
| 3697   | 5838   | 11304  | 12330  | 9136   |
| 1428   | 1945   | 3796   | 4297   | 3547   |
| 302    | 756    | 1894   | 1467   | 1030   |
| 983    | 1271   | 5249   | 5566   | 4278   |
| 4286   | 4326   | 16925  | 17295  | 14892  |
| 2996   | 2943   | 5064   | 2948   | 2751   |
| 2481   | 3044   | 4807   | 2432   | 1714   |
| 271    | 73     | 277    | 206    | 188    |
| 1446   | 1440   | 2631   | 1626   | 1508   |
| 376    | 633    | 1866   | 1705   | 1388   |
| 705    | 155    | 164    | 371    | 286    |
| 3980   | 1423   | 3651   | 3290   | 2736   |
| 583    | 498    | 1991   | 2439   | 1563   |
| 35021  | 15565  | 75982  | 50037  | 58001  |
| 161    | 134    | 325    | 411    | 344    |
| 31154  | 41738  | 101882 | 89332  | 81944  |
| 1105   | 1048   | 2154   | 1449   | 1032   |
| 1532   | 631    | 1326   | 923    | 840    |
| 5276   | 3522   | 3932   | 4520   | 3174   |
| 1183   | 1047   | 2316   | 1459   | 1332   |
| 784    | 223    | 1214   | 853    | 700    |
| 5641   | 3391   | 5148   | 3885   | 3142   |
| 108533 | 113680 | 331679 | 222020 | 199213 |
| 6951   | 7401   | 22178  | 24538  | 21052  |
| 2120   | 2772   | 9328   | 8782   | 8339   |
| 1717   | 854    | 3225   | 1959   | 1437   |
| 3887   | 1220   | 3062   | 3468   | 2304   |
| 13176  | 8637   | 14404  | 9270   | 8750   |
| 3408   | 2009   | 4185   | 3632   | 2726   |
| 1998   | 926    | 2412   | 1640   | 1745   |

|       |        |        |       |       |
|-------|--------|--------|-------|-------|
| 374   | 185    | 345    | 312   | 176   |
| 11724 | 6936   | 14156  | 10062 | 8110  |
| 3992  | 2687   | 4740   | 4577  | 3523  |
| 3106  | 4712   | 23529  | 19659 | 14445 |
| 1209  | 3148   | 6826   | 6838  | 4511  |
| 633   | 973    | 2152   | 2673  | 1612  |
| 1660  | 727    | 1205   | 991   | 817   |
| 8469  | 10399  | 26907  | 27380 | 27274 |
| 44206 | 31252  | 76412  | 61563 | 48941 |
| 407   | 508    | 2018   | 2047  | 2003  |
| 10361 | 13629  | 55527  | 52478 | 42562 |
| 116   | 299    | 1085   | 822   | 620   |
| 14174 | 10181  | 23371  | 18229 | 13744 |
| 2463  | 1848   | 4510   | 3750  | 2777  |
| 487   | 409    | 601    | 282   | 214   |
| 335   | 419    | 549    | 331   | 316   |
| 71    | 216    | 276    | 162   | 217   |
| 2785  | 2136   | 3710   | 3647  | 2785  |
| 2753  | 2166   | 6674   | 4352  | 3192  |
| 770   | 359    | 978    | 711   | 742   |
| 1659  | 2590   | 7678   | 7638  | 6226  |
| 2422  | 2369   | 6258   | 6137  | 5382  |
| 3414  | 1552   | 4623   | 3981  | 2954  |
| 510   | 250    | 849    | 650   | 646   |
| 1729  | 1723   | 5145   | 5287  | 4589  |
| 1124  | 1345   | 4143   | 2340  | 2080  |
| 840   | 969    | 2798   | 2455  | 1767  |
| 565   | 324    | 617    | 423   | 391   |
| 800   | 1302   | 1605   | 1621  | 1699  |
| 49    | 41     | 84     | 41    | 35    |
| 1735  | 561    | 2138   | 1644  | 1752  |
| 8786  | 6102   | 18029  | 14828 | 11772 |
| 98895 | 106513 | 112884 | 90423 | 61245 |
| 801   | 855    | 2110   | 2152  | 2012  |
| 4464  | 3239   | 8105   | 6003  | 4988  |
| 1110  | 753    | 1578   | 1191  | 1139  |
| 10094 | 8057   | 17501  | 13296 | 9560  |
| 1686  | 2034   | 2866   | 2001  | 1668  |
| 425   | 155    | 1135   | 769   | 462   |
| 1561  | 1411   | 3286   | 2271  | 2266  |
| 2887  | 1756   | 5296   | 3827  | 3414  |
| 204   | 354    | 2085   | 1597  | 947   |
| 2960  | 3726   | 17142  | 15762 | 14631 |
| 1323  | 1062   | 2162   | 1351  | 1199  |
| 2703  | 3125   | 11682  | 10980 | 10937 |
| 634   | 788    | 2375   | 1980  | 1471  |
| 1549  | 1154   | 6526   | 7554  | 5815  |
| 4478  | 6138   | 7184   | 4427  | 2907  |
| 8462  | 8907   | 35188  | 33932 | 29202 |
| 356   | 621    | 2926   | 2595  | 2092  |
| 4291  | 3226   | 6686   | 5713  | 4831  |
| 405   | 505    | 1963   | 1902  | 1575  |

|       |       |        |        |        |
|-------|-------|--------|--------|--------|
| 1290  | 630   | 1139   | 1063   | 745    |
| 1820  | 2880  | 3323   | 2880   | 2440   |
| 91326 | 84049 | 213343 | 152661 | 117224 |
| 1074  | 1333  | 5436   | 3127   | 2735   |
| 1957  | 802   | 3081   | 2253   | 1482   |
| 1329  | 805   | 1825   | 1409   | 1362   |
| 2514  | 2648  | 2600   | 1680   | 1479   |
| 1877  | 1605  | 2582   | 1945   | 1665   |
| 564   | 995   | 3014   | 2446   | 1888   |
| 568   | 577   | 1568   | 1705   | 1568   |
| 2887  | 4287  | 13881  | 9969   | 8637   |
| 7039  | 11112 | 14002  | 12058  | 10103  |
| 9880  | 5072  | 8496   | 9132   | 6798   |
| 2662  | 3140  | 11175  | 10330  | 8556   |
| 623   | 424   | 1006   | 578    | 389    |
| 7023  | 4874  | 6475   | 5180   | 4228   |
| 2482  | 2966  | 7435   | 3737   | 4384   |
| 2859  | 1869  | 4189   | 3406   | 3289   |
| 735   | 762   | 1482   | 764    | 688    |
| 9007  | 11150 | 23426  | 23228  | 22899  |
| 11684 | 6581  | 11969  | 8201   | 7752   |
| 3704  | 2016  | 5808   | 4966   | 3691   |
| 9050  | 7646  | 15553  | 17540  | 16677  |
| 21835 | 12637 | 44762  | 36496  | 20711  |
| 17626 | 15838 | 60799  | 68273  | 56069  |
| 1503  | 1784  | 2687   | 2607   | 1956   |
| 7143  | 5335  | 10145  | 8329   | 7594   |
| 10292 | 13265 | 49137  | 45948  | 34502  |
| 2869  | 3605  | 12190  | 10782  | 9444   |
| 1390  | 442   | 1223   | 1222   | 884    |
| 2916  | 4873  | 12702  | 11971  | 10424  |
| 224   | 260   | 926    | 1067   | 786    |
| 992   | 1692  | 4778   | 4182   | 3353   |
| 1342  | 1961  | 2996   | 2508   | 2377   |
| 2440  | 3606  | 5314   | 4704   | 3883   |
| 1582  | 2741  | 6141   | 5358   | 4975   |
| 12419 | 9604  | 18893  | 18468  | 16838  |
| 3220  | 2576  | 5275   | 4760   | 3318   |
| 1044  | 1610  | 3001   | 3200   | 2844   |
| 507   | 181   | 728    | 626    | 516    |
| 294   | 294   | 478    | 204    | 157    |
| 1120  | 529   | 2097   | 1659   | 1227   |
| 3100  | 4072  | 16034  | 14416  | 15282  |
| 519   | 580   | 2091   | 2188   | 1796   |
| 7539  | 8824  | 28756  | 28317  | 25360  |
| 21090 | 9816  | 28641  | 22352  | 15266  |
| 29484 | 37808 | 108319 | 109729 | 80875  |
| 996   | 1280  | 4501   | 4178   | 3564   |
| 96    | 71    | 650    | 696    | 693    |
| 869   | 272   | 993    | 773    | 571    |
| 1061  | 1107  | 4214   | 4165   | 3250   |
| 11757 | 11077 | 19789  | 16251  | 13962  |

|        |        |        |        |        |
|--------|--------|--------|--------|--------|
| 367    | 105    | 298    | 289    | 194    |
| 1225   | 1498   | 4026   | 3806   | 3098   |
| 1319   | 1074   | 2666   | 2782   | 2361   |
| 804    | 1163   | 3572   | 3752   | 2965   |
| 2103   | 2402   | 5692   | 5844   | 4704   |
| 107    | 23     | 114    | 90     | 63     |
| 123027 | 109574 | 185205 | 161820 | 144890 |
| 2907   | 1327   | 3993   | 3225   | 2382   |
| 107    | 44     | 68     | 45     | 33     |
| 1659   | 1806   | 5070   | 4706   | 4384   |
| 223    | 75     | 165    | 91     | 65     |
| 38236  | 27910  | 64383  | 56589  | 39900  |
| 1002   | 659    | 942    | 835    | 667    |
| 79     | 176    | 585    | 537    | 679    |
| 87333  | 72901  | 152791 | 105380 | 73967  |
| 1396   | 1351   | 3019   | 2165   | 1710   |
| 895    | 675    | 1457   | 1844   | 1330   |
| 4236   | 4446   | 11345  | 12351  | 9876   |
| 375    | 393    | 700    | 570    | 444    |
| 2247   | 3003   | 8629   | 8690   | 7192   |
| 29556  | 12673  | 31926  | 26219  | 19303  |
| 1446   | 1405   | 3585   | 2144   | 1811   |
| 5432   | 2760   | 7196   | 5871   | 4216   |
| 98     | 59     | 105    | 91     | 48     |
| 1101   | 616    | 1526   | 1413   | 918    |
| 513    | 429    | 1888   | 1904   | 1600   |
| 3550   | 9132   | 23616  | 22477  | 17883  |
| 3268   | 2307   | 4717   | 3560   | 2808   |
| 2483   | 1979   | 8676   | 8574   | 6934   |
| 941    | 1001   | 3645   | 3240   | 3138   |
| 1944   | 1364   | 4257   | 2998   | 2353   |
| 2938   | 1542   | 5045   | 4330   | 3379   |
| 7356   | 6024   | 13666  | 10023  | 6736   |
| 2722   | 4640   | 6791   | 6807   | 5831   |
| 2583   | 4441   | 11386  | 10258  | 9117   |
| 3837   | 2693   | 4685   | 3280   | 3814   |
| 1603   | 1346   | 3761   | 2619   | 1856   |
| 13565  | 22948  | 73390  | 61722  | 57273  |
| 42     | 8      | 17     | 8      | 7      |
| 854    | 269    | 771    | 653    | 534    |
| 2849   | 1691   | 4563   | 3584   | 2727   |
| 534    | 432    | 1633   | 1493   | 1191   |
| 60693  | 71495  | 107790 | 72548  | 44355  |
| 330    | 386    | 2253   | 1872   | 1390   |
| 465    | 647    | 1684   | 1642   | 1460   |
| 5071   | 6797   | 20820  | 19232  | 18280  |
| 681    | 365    | 2031   | 1315   | 1117   |
| 871    | 660    | 1925   | 1385   | 1165   |
| 409    | 828    | 2037   | 2013   | 1923   |
| 4602   | 8838   | 20663  | 15957  | 13617  |
| 3998   | 4169   | 10203  | 10599  | 9126   |
| 171    | 91     | 225    | 206    | 132    |

|       |      |       |       |       |
|-------|------|-------|-------|-------|
| 961   | 1091 | 5092  | 4678  | 5724  |
| 390   | 427  | 848   | 668   | 567   |
| 2015  | 2492 | 4203  | 3843  | 3215  |
| 1573  | 1145 | 2973  | 2390  | 1791  |
| 6426  | 6363 | 14680 | 9056  | 7474  |
| 0     | 0    | 41    | 56    | 67    |
| 3054  | 3843 | 8742  | 7921  | 6825  |
| 2692  | 1146 | 3339  | 2474  | 1856  |
| 1503  | 1652 | 4399  | 4663  | 3914  |
| 5695  | 3578 | 6570  | 5147  | 4181  |
| 221   | 350  | 900   | 1006  | 816   |
| 627   | 438  | 1708  | 900   | 885   |
| 1466  | 711  | 1430  | 1155  | 963   |
| 301   | 297  | 819   | 1154  | 657   |
| 2282  | 1402 | 3333  | 2555  | 2105  |
| 4552  | 3244 | 11675 | 9371  | 6710  |
| 410   | 585  | 1422  | 1372  | 895   |
| 2450  | 2654 | 2573  | 1676  | 1722  |
| 2172  | 2710 | 7702  | 4167  | 4259  |
| 1228  | 1511 | 3682  | 2052  | 1822  |
| 1481  | 2070 | 3184  | 3229  | 2857  |
| 2742  | 2848 | 7694  | 4922  | 3730  |
| 1442  | 1793 | 5542  | 5834  | 4459  |
| 671   | 787  | 1296  | 498   | 247   |
| 1133  | 1122 | 3832  | 3434  | 2992  |
| 1109  | 1644 | 5961  | 6464  | 5372  |
| 7844  | 4198 | 11763 | 9743  | 8084  |
| 2006  | 2684 | 11236 | 10787 | 8971  |
| 917   | 969  | 3604  | 3028  | 2158  |
| 1353  | 1537 | 4419  | 4017  | 3433  |
| 2855  | 3602 | 15807 | 11266 | 15641 |
| 126   | 22   | 144   | 88    | 84    |
| 4070  | 5926 | 18956 | 18653 | 12116 |
| 574   | 161  | 332   | 324   | 233   |
| 6025  | 3796 | 9709  | 8053  | 6565  |
| 1093  | 1139 | 2979  | 2902  | 2651  |
| 10076 | 7622 | 11017 | 12876 | 10571 |
| 475   | 223  | 506   | 426   | 367   |
| 386   | 168  | 572   | 474   | 329   |
| 602   | 1092 | 1760  | 1650  | 2069  |
| 242   | 196  | 331   | 190   | 188   |
| 637   | 610  | 2248  | 2246  | 2292  |
| 11691 | 9974 | 18106 | 15252 | 11272 |
| 848   | 728  | 1347  | 1106  | 765   |
| 2475  | 1477 | 2354  | 1830  | 1434  |
| 3556  | 3011 | 6819  | 5223  | 3541  |
| 329   | 263  | 503   | 415   | 274   |
| 695   | 542  | 983   | 666   | 613   |
| 1633  | 1504 | 3855  | 2412  | 2010  |
| 326   | 572  | 526   | 715   | 521   |
| 1339  | 1708 | 4839  | 4804  | 4330  |
| 647   | 888  | 1185  | 1294  | 1022  |



|        |        |        |        |        |
|--------|--------|--------|--------|--------|
| 6644   | 8987   | 15122  | 15879  | 13047  |
| 17317  | 21906  | 29012  | 18557  | 12649  |
| 448    | 666    | 1677   | 1851   | 1443   |
| 674    | 608    | 987    | 682    | 574    |
| 93     | 281    | 691    | 251    | 231    |
| 876    | 1228   | 2961   | 2689   | 2127   |
| 910    | 660    | 1999   | 1538   | 1334   |
| 307    | 145    | 363    | 249    | 173    |
| 2836   | 3809   | 8695   | 8995   | 6617   |
| 2847   | 2900   | 9888   | 9406   | 7341   |
| 441    | 545    | 2201   | 1540   | 1119   |
| 15651  | 8688   | 28950  | 23180  | 17582  |
| 957    | 356    | 1134   | 887    | 689    |
| 919    | 726    | 2712   | 1692   | 1259   |
| 9700   | 10271  | 34098  | 36369  | 25480  |
| 6060   | 3448   | 10861  | 8760   | 6696   |
| 22706  | 28445  | 46501  | 31568  | 19180  |
| 783    | 1125   | 2742   | 2517   | 1437   |
| 142388 | 177417 | 340371 | 225180 | 151166 |
| 4633   | 3394   | 9957   | 8730   | 7097   |
| 20804  | 5164   | 29951  | 21978  | 23180  |
| 867    | 305    | 662    | 610    | 366    |
| 982    | 183    | 553    | 492    | 340    |
| 2147   | 2544   | 5558   | 5344   | 4201   |
| 429    | 529    | 1001   | 859    | 833    |
| 704    | 368    | 655    | 561    | 397    |
| 588    | 689    | 2230   | 4548   | 2106   |
| 2422   | 3056   | 7134   | 6386   | 5104   |
| 5732   | 5841   | 13213  | 9438   | 7303   |
| 3682   | 2833   | 6038   | 6067   | 7070   |
| 3054   | 6026   | 12992  | 14621  | 10195  |
| 529    | 492    | 1888   | 1781   | 1639   |
| 1256   | 3450   | 16210  | 14167  | 10792  |
| 7511   | 6867   | 29393  | 29130  | 24240  |
| 978    | 1363   | 2291   | 1455   | 1229   |
| 2646   | 5710   | 14204  | 10678  | 9889   |
| 5051   | 5875   | 18520  | 19990  | 14976  |
| 1440   | 1641   | 2697   | 1593   | 1503   |
| 15401  | 17336  | 54877  | 54142  | 45777  |
| 3062   | 1480   | 3459   | 3302   | 2150   |
| 330    | 301    | 965    | 739    | 539    |
| 5086   | 3620   | 8547   | 7016   | 4802   |
| 332    | 590    | 1203   | 1509   | 1140   |
| 671    | 632    | 1198   | 1180   | 1165   |
| 124028 | 147140 | 320300 | 207212 | 137414 |
| 2333   | 1907   | 5311   | 3061   | 3101   |
| 13035  | 6381   | 25284  | 19667  | 13684  |
| 231    | 281    | 969    | 1423   | 927    |
| 430    | 590    | 3044   | 2402   | 2972   |
| 653    | 580    | 576    | 522    | 435    |
| 631    | 901    | 2649   | 2497   | 1746   |
| 29     | 27     | 40     | 24     | 28     |

|        |        |        |        |        |
|--------|--------|--------|--------|--------|
| 2071   | 2988   | 9184   | 8124   | 6733   |
| 2308   | 1584   | 2764   | 2040   | 2162   |
| 196    | 196    | 383    | 402    | 333    |
| 1407   | 1202   | 2521   | 2619   | 2368   |
| 239    | 366    | 721    | 771    | 543    |
| 100    | 259    | 826    | 549    | 522    |
| 2794   | 1850   | 4470   | 3134   | 2794   |
| 1291   | 1455   | 4782   | 4611   | 3813   |
| 1645   | 1676   | 3129   | 2611   | 2069   |
| 488    | 474    | 998    | 698    | 491    |
| 5854   | 3859   | 8447   | 6575   | 5661   |
| 506    | 636    | 1344   | 1050   | 803    |
| 0      | 12     | 30     | 11     | 15     |
| 2464   | 1571   | 4432   | 3303   | 2350   |
| 9290   | 12341  | 19191  | 17893  | 14024  |
| 7032   | 4850   | 16130  | 12537  | 9706   |
| 483    | 507    | 1486   | 1605   | 1313   |
| 2618   | 1879   | 2991   | 2733   | 2131   |
| 1752   | 1278   | 1887   | 1767   | 1147   |
| 1502   | 1435   | 4702   | 4860   | 3579   |
| 851    | 1058   | 1621   | 1585   | 1429   |
| 219    | 147    | 507    | 489    | 253    |
| 4957   | 3288   | 6952   | 5940   | 5404   |
| 112    | 54     | 133    | 60     | 65     |
| 625    | 887    | 1827   | 1655   | 1449   |
| 8254   | 8428   | 24801  | 24453  | 22770  |
| 846    | 1010   | 5081   | 4749   | 3816   |
| 2571   | 2849   | 10685  | 9117   | 6663   |
| 117    | 237    | 611    | 728    | 619    |
| 3      | 2      | 21     | 30     | 29     |
| 16104  | 12712  | 33121  | 29906  | 19602  |
| 14283  | 16796  | 37484  | 21752  | 20226  |
| 73858  | 107275 | 202719 | 128540 | 81292  |
| 1441   | 787    | 1918   | 1592   | 1293   |
| 137670 | 161440 | 265539 | 186761 | 144686 |
| 7058   | 4980   | 9637   | 7924   | 6563   |
| 1326   | 2028   | 2632   | 2444   | 1783   |
| 956    | 1028   | 1725   | 1257   | 1029   |
| 284    | 250    | 1090   | 1535   | 943    |
| 1606   | 1562   | 3841   | 4034   | 3489   |
| 72     | 133    | 594    | 473    | 299    |
| 383    | 229    | 635    | 453    | 392    |
| 543    | 207    | 630    | 442    | 314    |
| 10923  | 8790   | 17516  | 14138  | 9860   |
| 10663  | 11616  | 37809  | 36435  | 31578  |
| 4429   | 4931   | 8209   | 5014   | 4510   |
| 563    | 761    | 3550   | 3168   | 2531   |
| 1430   | 825    | 981    | 638    | 1036   |
| 1547   | 2416   | 6152   | 5615   | 4517   |
| 5312   | 7480   | 30321  | 25274  | 17629  |
| 841    | 1136   | 1545   | 1481   | 1148   |
| 2607   | 1822   | 5468   | 4110   | 2824   |

|        |        |         |         |         |
|--------|--------|---------|---------|---------|
| 765    | 932    | 1602    | 942     | 728     |
| 2847   | 3034   | 11104   | 10570   | 8548    |
| 42147  | 29777  | 97090   | 73777   | 35120   |
| 4028   | 3908   | 11963   | 8025    | 5657    |
| 472    | 748    | 3071    | 2488    | 1926    |
| 2378   | 1021   | 78      | 158     | 213     |
| 1340   | 1550   | 5559    | 3343    | 3021    |
| 1782   | 1308   | 6076    | 5377    | 3660    |
| 12     | 36     | 26      | 223     | 66      |
| 602    | 473    | 1916    | 1206    | 707     |
| 854    | 889    | 1174    | 750     | 589     |
| 7130   | 6624   | 9279    | 7861    | 6832    |
| 350    | 287    | 233     | 183     | 114     |
| 26613  | 25244  | 65980   | 65938   | 61460   |
| 1660   | 2297   | 5852    | 5163    | 3575    |
| 2273   | 2618   | 7606    | 7118    | 6106    |
| 1351   | 1644   | 2144    | 1363    | 1145    |
| 226    | 306    | 646     | 507     | 258     |
| 3904   | 1619   | 6228    | 5238    | 3812    |
| 4933   | 5582   | 17785   | 16508   | 12699   |
| 3143   | 3110   | 9328    | 8757    | 8004    |
| 3060   | 4942   | 17174   | 13808   | 14283   |
| 288    | 530    | 609     | 578     | 533     |
| 5      | 0      | 44      | 131     | 81      |
| 133    | 193    | 527     | 625     | 430     |
| 504    | 613    | 1044    | 577     | 523     |
| 1690   | 1723   | 4169    | 2261    | 2033    |
| 353    | 93     | 212     | 230     | 215     |
| 2155   | 2721   | 4634    | 4418    | 4311    |
| 979    | 571    | 1565    | 1099    | 916     |
| 5906   | 3402   | 17178   | 13439   | 10327   |
| 255    | 268    | 1526    | 1444    | 1192    |
| 821937 | 659993 | 1731900 | 1495194 | 1021018 |
| 608    | 588    | 1116    | 526     | 616     |
| 2918   | 2673   | 5781    | 3272    | 3086    |
| 373783 | 289141 | 833753  | 706357  | 452703  |
| 798    | 1138   | 1977    | 1815    | 1329    |
| 34     | 123    | 369     | 317     | 217     |
| 10729  | 9280   | 23165   | 14680   | 12105   |
| 540    | 285    | 984     | 1131    | 1596    |
| 89     | 19     | 31      | 19      | 19      |
| 9900   | 10976  | 36239   | 34458   | 29957   |
| 2      | 12     | 100     | 80      | 37      |
| 253    | 58     | 6       | 6       | 7       |
| 22434  | 12058  | 28841   | 21028   | 19199   |
| 7412   | 4756   | 19694   | 15859   | 9207    |
| 945    | 567    | 1428    | 1188    | 1066    |
| 4312   | 4367   | 7335    | 4528    | 4079    |
| 901    | 547    | 1173    | 1054    | 846     |
| 245    | 361    | 701     | 656     | 661     |
| 5347   | 4445   | 9411    | 7157    | 6401    |
| 28326  | 17809  | 28637   | 24342   | 19313   |

|       |       |       |       |       |
|-------|-------|-------|-------|-------|
| 996   | 1340  | 1508  | 1437  | 1547  |
| 1406  | 1679  | 2738  | 2675  | 2417  |
| 11572 | 7929  | 13230 | 11786 | 8590  |
| 301   | 365   | 1572  | 1674  | 1490  |
| 79    | 50    | 131   | 117   | 71    |
| 4037  | 2128  | 11258 | 9734  | 8001  |
| 265   | 277   | 1035  | 980   | 951   |
| 369   | 251   | 1498  | 1466  | 1145  |
| 9296  | 8934  | 6434  | 5655  | 4784  |
| 2410  | 2709  | 5480  | 5785  | 4670  |
| 1200  | 860   | 4256  | 3225  | 2668  |
| 1259  | 1548  | 5640  | 5198  | 4235  |
| 4975  | 6089  | 15957 | 13799 | 12519 |
| 2565  | 2664  | 10028 | 7093  | 6344  |
| 1389  | 1348  | 2573  | 1794  | 1489  |
| 191   | 219   | 726   | 626   | 744   |
| 813   | 513   | 1194  | 981   | 866   |
| 20    | 71    | 233   | 279   | 177   |
| 117   | 0     | 146   | 152   | 124   |
| 12395 | 15654 | 25241 | 22960 | 21149 |
| 891   | 618   | 1058  | 1081  | 662   |
| 5969  | 6655  | 17228 | 16303 | 14531 |
| 366   | 639   | 1077  | 902   | 724   |
| 785   | 967   | 1691  | 1726  | 1532  |
| 1115  | 632   | 2066  | 1603  | 1155  |
| 449   | 623   | 2116  | 2168  | 1816  |
| 14347 | 16759 | 52604 | 46355 | 38844 |
| 7400  | 5440  | 15195 | 12027 | 8564  |
| 770   | 705   | 1062  | 787   | 597   |
| 1280  | 1319  | 3009  | 2100  | 1472  |
| 9102  | 8605  | 16879 | 11637 | 9851  |
| 325   | 364   | 419   | 563   | 582   |
| 1568  | 2276  | 4188  | 4250  | 3594  |
| 885   | 1319  | 4712  | 3721  | 3334  |
| 437   | 220   | 348   | 325   | 263   |
| 607   | 1472  | 9702  | 6991  | 4544  |
| 69    | 136   | 371   | 344   | 215   |
| 361   | 337   | 1186  | 711   | 456   |
| 712   | 809   | 2116  | 2125  | 1882  |
| 2870  | 3254  | 6981  | 4737  | 3420  |
| 241   | 200   | 709   | 414   | 573   |
| 1217  | 1504  | 3279  | 1908  | 1599  |
| 5730  | 4913  | 10230 | 8581  | 6426  |
| 18    | 42    | 82    | 115   | 89    |
| 280   | 328   | 1011  | 929   | 731   |
| 18518 | 12947 | 27038 | 18893 | 15871 |
| 2035  | 1478  | 3678  | 2830  | 1962  |
| 2516  | 1044  | 3376  | 2168  | 2322  |
| 2760  | 3046  | 6658  | 7327  | 5731  |
| 3689  | 4113  | 10105 | 10073 | 9074  |
| 3715  | 4122  | 13118 | 12645 | 10075 |
| 1683  | 1820  | 5161  | 4659  | 4462  |

|        |        |         |         |         |
|--------|--------|---------|---------|---------|
| 7437   | 10570  | 28505   | 28660   | 22656   |
| 9420   | 8748   | 16313   | 13513   | 12415   |
| 1491   | 793    | 1677    | 1385    | 989     |
| 9584   | 6410   | 11479   | 9879    | 6664    |
| 2800   | 1066   | 3387    | 2729    | 2387    |
| 706553 | 595351 | 1348126 | 1152419 | 880062  |
| 3430   | 3319   | 7901    | 6016    | 5242    |
| 1539   | 1831   | 4665    | 3987    | 3175    |
| 2278   | 1865   | 7471    | 7117    | 5465    |
| 299    | 307    | 832     | 525     | 397     |
| 179    | 170    | 287     | 381     | 338     |
| 2539   | 2799   | 10708   | 10685   | 7699    |
| 234    | 90     | 195     | 524     | 270     |
| 2923   | 1886   | 1927    | 2151    | 1831    |
| 2076   | 2080   | 7054    | 7034    | 4551    |
| 59     | 13     | 356     | 378     | 368     |
| 2587   | 1083   | 10002   | 6801    | 4283    |
| 3728   | 3290   | 7350    | 5409    | 4315    |
| 1717   | 927    | 3465    | 2528    | 1995    |
| 756126 | 626450 | 1531730 | 1438405 | 1061854 |
| 178    | 116    | 130     | 150     | 113     |
| 4699   | 5398   | 5672    | 3638    | 2861    |
| 848    | 252    | 1145    | 824     | 680     |
| 158    | 405    | 707     | 704     | 627     |
| 139    | 260    | 1077    | 888     | 649     |
| 2306   | 5291   | 14824   | 10994   | 12416   |
| 10000  | 12876  | 30421   | 20193   | 14344   |
| 5466   | 5358   | 7206    | 6709    | 5605    |
| 592    | 467    | 791     | 560     | 428     |
| 129    | 134    | 483     | 455     | 430     |
| 1514   | 1718   | 4472    | 4668    | 3523    |
| 3570   | 3942   | 15026   | 13798   | 11583   |
| 680    | 574    | 1116    | 853     | 608     |
| 715    | 203    | 1809    | 1158    | 709     |
| 63     | 108    | 406     | 526     | 341     |
| 2496   | 2594   | 8550    | 8168    | 7386    |
| 7635   | 7668   | 11032   | 9419    | 6833    |
| 1723   | 1108   | 2460    | 1886    | 1484    |
| 15977  | 11579  | 29898   | 23926   | 17574   |
| 1888   | 1448   | 5191    | 4861    | 3778    |
| 562    | 376    | 1875    | 1374    | 925     |
| 2854   | 2270   | 6663    | 5433    | 4218    |
| 2732   | 3150   | 8195    | 7004    | 6317    |
| 269    | 264    | 1154    | 1100    | 933     |
| 1846   | 1038   | 3022    | 2385    | 1797    |
| 135424 | 121999 | 358473  | 339193  | 261168  |
| 270    | 288    | 1212    | 1262    | 990     |
| 4150   | 3579   | 9468    | 6590    | 5230    |
| 1811   | 1505   | 3687    | 2636    | 2025    |
| 152    | 115    | 308     | 219     | 152     |
| 6357   | 6412   | 19325   | 17847   | 14703   |
| 80431  | 60477  | 154549  | 119228  | 99612   |

|       |       |        |        |       |
|-------|-------|--------|--------|-------|
| 559   | 761   | 2275   | 2233   | 1720  |
| 911   | 1102  | 2416   | 2117   | 2003  |
| 1901  | 1466  | 3807   | 2480   | 2122  |
| 2769  | 1656  | 3101   | 2593   | 2084  |
| 587   | 336   | 1079   | 762    | 541   |
| 1233  | 1560  | 4167   | 3025   | 3087  |
| 9     | 33    | 61     | 64     | 54    |
| 15588 | 12878 | 32867  | 26132  | 21178 |
| 1519  | 1030  | 2923   | 2806   | 2040  |
| 5468  | 3157  | 5290   | 4899   | 3307  |
| 1367  | 875   | 1662   | 1461   | 937   |
| 196   | 284   | 873    | 818    | 699   |
| 525   | 453   | 1633   | 1615   | 1260  |
| 46646 | 32577 | 126152 | 108753 | 78519 |
| 20085 | 21555 | 73703  | 70805  | 57593 |
| 349   | 532   | 1500   | 1485   | 1134  |
| 433   | 632   | 1938   | 1886   | 1509  |
| 1996  | 3151  | 7196   | 7309   | 4212  |
| 868   | 1245  | 2731   | 2454   | 2507  |
| 363   | 455   | 2047   | 1036   | 981   |
| 1114  | 1227  | 6594   | 6506   | 5655  |
| 617   | 1039  | 1375   | 1245   | 950   |
| 3696  | 4637  | 7926   | 5282   | 4604  |
| 540   | 416   | 715    | 614    | 461   |
| 926   | 1442  | 2164   | 1870   | 1619  |
| 1974  | 2523  | 5630   | 4998   | 4407  |
| 526   | 962   | 2690   | 2266   | 1407  |
| 1048  | 901   | 2155   | 2456   | 1904  |
| 391   | 356   | 697    | 487    | 373   |
| 4658  | 5466  | 14366  | 13469  | 11163 |
| 2534  | 668   | 1815   | 1624   | 1438  |
| 384   | 566   | 1148   | 993    | 845   |
| 182   | 130   | 184    | 135    | 125   |
| 1374  | 1781  | 4913   | 4428   | 3994  |
| 171   | 176   | 487    | 609    | 520   |
| 5384  | 5685  | 11302  | 6656   | 4867  |
| 7258  | 4811  | 10079  | 8256   | 5947  |
| 3025  | 3744  | 11272  | 10057  | 8964  |
| 148   | 107   | 153    | 122    | 112   |
| 1506  | 1586  | 4741   | 2949   | 2702  |
| 784   | 1139  | 4375   | 4416   | 3664  |
| 1445  | 740   | 2619   | 2596   | 1655  |
| 1972  | 2266  | 7365   | 7271   | 5776  |
| 1044  | 1295  | 4491   | 3706   | 3205  |
| 1020  | 1949  | 4043   | 3234   | 2501  |
| 698   | 564   | 1293   | 858    | 659   |
| 185   | 388   | 326    | 254    | 243   |
| 1733  | 1905  | 1795   | 3461   | 1581  |
| 19126 | 13607 | 39197  | 36673  | 27950 |
| 22807 | 18991 | 46611  | 32378  | 23309 |
| 2434  | 3130  | 16023  | 15223  | 10859 |
| 85    | 52    | 173    | 118    | 77    |

|        |        |        |        |        |
|--------|--------|--------|--------|--------|
| 314    | 100    | 338    | 352    | 235    |
| 10067  | 9395   | 13334  | 9551   | 8278   |
| 1398   | 1313   | 2590   | 1870   | 1317   |
| 440    | 360    | 1831   | 1487   | 1102   |
| 5096   | 7809   | 25179  | 23315  | 16202  |
| 3448   | 4397   | 8001   | 7200   | 6595   |
| 864    | 922    | 2128   | 1259   | 1253   |
| 127    | 171    | 700    | 626    | 538    |
| 1920   | 1610   | 4829   | 3483   | 3034   |
| 1217   | 623    | 1589   | 1277   | 1124   |
| 438    | 645    | 1166   | 945    | 751    |
| 3044   | 4178   | 5452   | 3063   | 2996   |
| 2775   | 3819   | 9721   | 8216   | 6376   |
| 7891   | 9434   | 19305  | 15652  | 14889  |
| 1268   | 1647   | 4540   | 4355   | 3933   |
| 1794   | 1646   | 3195   | 2526   | 2220   |
| 1722   | 1530   | 2873   | 2673   | 1939   |
| 390    | 598    | 2339   | 2311   | 1802   |
| 1289   | 1250   | 3970   | 3650   | 3395   |
| 1260   | 805    | 3584   | 2788   | 3229   |
| 191    | 224    | 88     | 110    | 180    |
| 1909   | 3196   | 8331   | 7472   | 5437   |
| 824    | 588    | 1884   | 2423   | 2569   |
| 1556   | 2200   | 6325   | 5577   | 5848   |
| 188    | 274    | 2169   | 2240   | 1690   |
| 555    | 497    | 1125   | 734    | 515    |
| 261    | 306    | 1150   | 968    | 1043   |
| 224    | 136    | 379    | 291    | 197    |
| 17311  | 19173  | 46267  | 44989  | 38565  |
| 74     | 18     | 67     | 58     | 45     |
| 157    | 100    | 115    | 111    | 197    |
| 3224   | 3054   | 15153  | 14389  | 10947  |
| 850    | 828    | 4106   | 4168   | 3689   |
| 819    | 954    | 2518   | 2454   | 1988   |
| 23548  | 29780  | 77406  | 51409  | 39514  |
| 1331   | 2027   | 8403   | 7171   | 4426   |
| 292    | 374    | 1133   | 1040   | 776    |
| 5521   | 5810   | 11009  | 6767   | 6750   |
| 4978   | 5412   | 13635  | 8355   | 7488   |
| 3539   | 4098   | 8346   | 7399   | 6121   |
| 924    | 1060   | 2839   | 2397   | 2094   |
| 7246   | 8376   | 24846  | 21771  | 21860  |
| 4968   | 5982   | 17718  | 15713  | 12024  |
| 1209   | 1004   | 2073   | 1601   | 1075   |
| 368    | 317    | 2111   | 1986   | 1647   |
| 3917   | 4715   | 10687  | 9510   | 7796   |
| 916    | 901    | 3744   | 3269   | 2520   |
| 1193   | 1305   | 2688   | 1775   | 1552   |
| 251928 | 329610 | 416071 | 280939 | 211030 |
| 15794  | 19713  | 26257  | 14334  | 14280  |
| 3225   | 4106   | 8414   | 8508   | 7731   |
| 6722   | 3571   | 12029  | 9371   | 6874   |

|       |       |       |       |       |
|-------|-------|-------|-------|-------|
| 13477 | 13812 | 50180 | 46616 | 40413 |
| 1304  | 1829  | 6332  | 4913  | 3476  |
| 332   | 196   | 347   | 293   | 239   |
| 1010  | 1052  | 4082  | 3750  | 2644  |
| 24    | 50    | 130   | 153   | 208   |
| 958   | 1223  | 5268  | 3187  | 3544  |
| 1211  | 839   | 2463  | 1866  | 1140  |
| 4245  | 2899  | 5442  | 4810  | 3307  |
| 113   | 202   | 338   | 302   | 312   |
| 60    | 0     | 26    | 23    | 24    |
| 15491 | 23689 | 40627 | 27032 | 27363 |
| 6479  | 7571  | 13858 | 9948  | 5529  |
| 677   | 662   | 1698  | 1715  | 1231  |
| 259   | 286   | 752   | 372   | 519   |
| 4016  | 7651  | 14940 | 11242 | 11646 |
| 7218  | 7589  | 28321 | 24290 | 21616 |
| 1814  | 1598  | 7932  | 7385  | 5659  |
| 11259 | 8183  | 13830 | 11353 | 7777  |
| 2678  | 1812  | 3024  | 2391  | 2242  |
| 18537 | 23988 | 33241 | 21629 | 17936 |
| 541   | 668   | 1339  | 760   | 779   |
| 4111  | 4528  | 9975  | 5501  | 5085  |
| 2778  | 4093  | 6069  | 5666  | 4922  |
| 3978  | 4489  | 14439 | 12987 | 11444 |
| 1327  | 1488  | 4505  | 4046  | 3940  |
| 1167  | 1410  | 2567  | 2234  | 1963  |
| 236   | 77    | 401   | 301   | 221   |
| 6824  | 10195 | 15722 | 10190 | 6083  |
| 21609 | 18463 | 41414 | 31438 | 23993 |
| 195   | 88    | 158   | 150   | 122   |
| 469   | 665   | 939   | 780   | 688   |
| 846   | 869   | 1793  | 1083  | 1020  |
| 319   | 296   | 713   | 403   | 236   |
| 3294  | 4183  | 7985  | 7117  | 6254  |
| 180   | 195   | 850   | 868   | 615   |
| 493   | 650   | 991   | 910   | 807   |
| 16754 | 19247 | 35773 | 19998 | 19113 |
| 16902 | 28718 | 52052 | 43933 | 33728 |
| 6884  | 3905  | 9601  | 8006  | 6436  |
| 4703  | 4522  | 6425  | 4954  | 3946  |
| 437   | 452   | 1091  | 1098  | 1060  |
| 937   | 1239  | 3619  | 3552  | 3558  |
| 2857  | 1709  | 3589  | 5494  | 3739  |
| 501   | 561   | 1477  | 1280  | 1046  |
| 10119 | 6420  | 22208 | 16404 | 14259 |
| 1753  | 954   | 2760  | 2034  | 1364  |
| 655   | 736   | 2436  | 2448  | 2291  |
| 1493  | 2284  | 3505  | 3055  | 2906  |
| 155   | 138   | 376   | 378   | 392   |
| 5882  | 5791  | 9457  | 5375  | 4912  |
| 965   | 844   | 1320  | 985   | 934   |
| 3789  | 4120  | 7053  | 4517  | 3263  |



|        |        |        |        |        |
|--------|--------|--------|--------|--------|
| 81029  | 70115  | 127061 | 91035  | 65617  |
| 824    | 1128   | 2584   | 1720   | 1355   |
| 868    | 862    | 2135   | 1208   | 1152   |
| 3812   | 1833   | 6527   | 5913   | 3465   |
| 966    | 1081   | 2925   | 1786   | 1444   |
| 1120   | 844    | 2200   | 2033   | 1792   |
| 1490   | 1531   | 5480   | 5224   | 4958   |
| 1685   | 2048   | 3419   | 3266   | 2866   |
| 526    | 132    | 947    | 935    | 648    |
| 1195   | 1030   | 2635   | 2114   | 1217   |
| 9083   | 10777  | 46046  | 35423  | 35276  |
| 4241   | 4158   | 10311  | 5830   | 6075   |
| 122    | 43     | 27     | 29     | 12     |
| 1290   | 1842   | 3799   | 3621   | 3099   |
| 1944   | 1984   | 8282   | 7358   | 6070   |
| 3861   | 4740   | 11810  | 9856   | 8227   |
| 29103  | 36546  | 58104  | 41306  | 28022  |
| 6137   | 5394   | 11615  | 9207   | 7710   |
| 1658   | 1825   | 5664   | 5313   | 4483   |
| 4347   | 6542   | 22792  | 19932  | 13958  |
| 4443   | 4076   | 6619   | 5920   | 4973   |
| 7529   | 8262   | 27539  | 26615  | 19984  |
| 629    | 391    | 636    | 529    | 282    |
| 1895   | 2596   | 2065   | 1741   | 1311   |
| 289615 | 350195 | 573369 | 398196 | 294727 |
| 148192 | 146627 | 278908 | 250913 | 189379 |
| 1942   | 3131   | 5636   | 5088   | 4372   |
| 533    | 522    | 896    | 649    | 561    |
| 522    | 331    | 789    | 712    | 615    |
| 19094  | 12507  | 20505  | 17240  | 11656  |
| 110    | 123    | 238    | 255    | 298    |
| 4247   | 5220   | 12494  | 6538   | 7827   |
| 3015   | 4530   | 16868  | 14670  | 11583  |
| 2870   | 2801   | 4114   | 2967   | 2402   |
| 8700   | 10671  | 20513  | 19153  | 17294  |
| 175    | 129    | 699    | 933    | 632    |
| 1013   | 1653   | 4991   | 5021   | 4693   |
| 61     | 89     | 229    | 319    | 207    |
| 2760   | 2801   | 4971   | 3622   | 2814   |
| 296    | 520    | 2218   | 1802   | 1599   |
| 1023   | 1706   | 2965   | 2606   | 2378   |
| 3191   | 3741   | 14242  | 12631  | 10034  |
| 6617   | 9211   | 20274  | 17434  | 17506  |
| 1817   | 2141   | 5295   | 3317   | 3076   |
| 116918 | 113809 | 470685 | 341146 | 265563 |
| 482    | 674    | 1921   | 1862   | 1579   |
| 1384   | 1604   | 5538   | 5061   | 3976   |
| 1958   | 2651   | 6635   | 5838   | 5593   |
| 1990   | 1403   | 3559   | 2428   | 2164   |
| 645    | 258    | 1296   | 1003   | 729    |
| 27005  | 37294  | 105548 | 98799  | 87336  |
| 4711   | 5941   | 15624  | 13407  | 11651  |

|       |       |        |        |        |
|-------|-------|--------|--------|--------|
| 1092  | 1342  | 4325   | 4076   | 3848   |
| 1391  | 2895  | 7661   | 7387   | 4765   |
| 1527  | 1421  | 2031   | 1586   | 1306   |
| 694   | 869   | 2806   | 2945   | 1984   |
| 168   | 159   | 236    | 93     | 100    |
| 5901  | 2141  | 8988   | 5996   | 5943   |
| 674   | 694   | 1944   | 2151   | 1870   |
| 169   | 409   | 543    | 572    | 532    |
| 1360  | 1177  | 2981   | 3407   | 2815   |
| 1862  | 2789  | 5287   | 3706   | 3005   |
| 97775 | 77860 | 275186 | 228901 | 173459 |
| 1074  | 993   | 4662   | 4602   | 2838   |
| 3765  | 3641  | 6127   | 4290   | 3898   |
| 154   | 251   | 394    | 139    | 96     |
| 2864  | 3826  | 9317   | 8402   | 7443   |
| 2036  | 2129  | 3269   | 2514   | 1888   |
| 707   | 838   | 1327   | 1165   | 744    |
| 1676  | 1874  | 4482   | 4266   | 4016   |
| 1239  | 1335  | 3060   | 2866   | 2627   |
| 1927  | 2279  | 6127   | 3632   | 3903   |
| 7637  | 6375  | 16693  | 15922  | 13042  |
| 4911  | 5090  | 11583  | 7078   | 6360   |
| 468   | 193   | 623    | 387    | 302    |
| 1207  | 807   | 1847   | 1500   | 1024   |
| 532   | 601   | 883    | 426    | 532    |
| 168   | 87    | 295    | 160    | 119    |
| 233   | 398   | 1254   | 1214   | 1003   |
| 1184  | 1505  | 3577   | 3322   | 2730   |
| 5041  | 3936  | 7207   | 6412   | 5221   |
| 1901  | 1089  | 2948   | 2541   | 1971   |
| 374   | 186   | 659    | 491    | 411    |
| 4033  | 4751  | 11325  | 5960   | 6759   |
| 3314  | 3115  | 7141   | 5215   | 4053   |
| 825   | 897   | 4029   | 3268   | 2665   |
| 219   | 311   | 680    | 622    | 572    |
| 835   | 1035  | 2290   | 2080   | 2477   |
| 395   | 327   | 2283   | 1940   | 1293   |
| 370   | 426   | 1175   | 1073   | 1021   |
| 6115  | 3540  | 6440   | 6834   | 6100   |
| 10802 | 11441 | 36348  | 35040  | 29516  |
| 332   | 345   | 636    | 785    | 447    |
| 39    | 17    | 98     | 53     | 51     |
| 5539  | 6609  | 16304  | 15197  | 13095  |
| 108   | 97    | 92     | 66     | 68     |
| 849   | 553   | 1052   | 796    | 672    |
| 7039  | 8088  | 34423  | 35255  | 30256  |
| 2400  | 1501  | 3529   | 2923   | 2353   |
| 251   | 255   | 917    | 893    | 781    |
| 3180  | 3161  | 6103   | 4642   | 4321   |
| 3086  | 3675  | 8470   | 6893   | 6370   |
| 316   | 249   | 1127   | 1334   | 926    |
| 1175  | 1086  | 3134   | 2261   | 1567   |

|       |       |       |       |       |
|-------|-------|-------|-------|-------|
| 3464  | 2873  | 4497  | 3873  | 3309  |
| 2026  | 2818  | 9757  | 8417  | 6920  |
| 45520 | 29953 | 87506 | 68407 | 54275 |
| 4     | 0     | 3     | 1     | 1     |
| 1002  | 1899  | 5407  | 4561  | 3387  |
| 1117  | 983   | 3368  | 3212  | 2753  |
| 2444  | 3169  | 6883  | 4301  | 3716  |
| 2747  | 1439  | 4645  | 3903  | 3755  |
| 1396  | 1598  | 5300  | 5061  | 4316  |
| 331   | 148   | 491   | 367   | 343   |
| 1076  | 1023  | 2017  | 1636  | 1366  |
| 2717  | 2606  | 5868  | 4361  | 4549  |
| 2216  | 2468  | 5832  | 5766  | 4723  |
| 856   | 550   | 1301  | 1014  | 740   |
| 2705  | 3312  | 7185  | 6312  | 5140  |
| 4046  | 2261  | 7034  | 5511  | 3941  |
| 2134  | 2068  | 7177  | 6164  | 5537  |
| 1114  | 581   | 1778  | 1502  | 1052  |
| 2420  | 3051  | 7776  | 7053  | 6013  |
| 497   | 419   | 896   | 703   | 368   |
| 3599  | 3306  | 8387  | 7062  | 4929  |
| 230   | 132   | 456   | 334   | 230   |
| 265   | 217   | 397   | 187   | 147   |
| 1933  | 939   | 3234  | 2555  | 2043  |
| 631   | 616   | 1965  | 2092  | 1936  |
| 351   | 705   | 1879  | 1384  | 1227  |
| 4331  | 2159  | 5086  | 4402  | 3323  |
| 390   | 391   | 1286  | 1233  | 981   |
| 2431  | 1847  | 3391  | 2738  | 2252  |
| 1672  | 1802  | 6573  | 5797  | 5820  |
| 3494  | 3688  | 8070  | 5652  | 4420  |
| 8790  | 17447 | 33769 | 28639 | 24162 |
| 2132  | 1990  | 4393  | 3326  | 2861  |
| 1265  | 1467  | 4466  | 3922  | 3160  |
| 693   | 614   | 2779  | 1913  | 1708  |
| 1411  | 1468  | 3835  | 3683  | 2814  |
| 293   | 300   | 891   | 512   | 322   |
| 213   | 116   | 337   | 223   | 186   |
| 2759  | 3486  | 8515  | 7916  | 6432  |
| 4008  | 2779  | 5612  | 4585  | 3721  |
| 5458  | 4650  | 5737  | 5960  | 5445  |
| 39    | 4     | 43    | 34    | 27    |
| 1533  | 1431  | 3917  | 2262  | 2165  |
| 1566  | 2276  | 3703  | 3128  | 2440  |
| 2452  | 2849  | 6144  | 4022  | 3417  |
| 1568  | 2645  | 4151  | 3903  | 3727  |
| 814   | 1265  | 4047  | 3609  | 3404  |
| 1713  | 2253  | 7193  | 6397  | 5114  |
| 188   | 113   | 384   | 267   | 204   |
| 893   | 1026  | 2517  | 2444  | 2024  |
| 805   | 820   | 1928  | 1460  | 1102  |
| 261   | 444   | 950   | 823   | 673   |

|       |       |       |       |       |
|-------|-------|-------|-------|-------|
| 1725  | 1719  | 3527  | 2356  | 2206  |
| 5991  | 6525  | 18894 | 17167 | 13929 |
| 423   | 253   | 604   | 488   | 339   |
| 2634  | 1938  | 5193  | 4269  | 3172  |
| 79    | 118   | 392   | 339   | 299   |
| 2949  | 1812  | 6097  | 4664  | 3315  |
| 97    | 23    | 44    | 28    | 20    |
| 97    | 23    | 44    | 28    | 20    |
| 97    | 23    | 44    | 28    | 20    |
| 310   | 189   | 1051  | 732   | 552   |
| 4578  | 5360  | 12542 | 6749  | 6644  |
| 1521  | 852   | 1957  | 1729  | 1409  |
| 12717 | 12222 | 35826 | 25040 | 18417 |
| 14280 | 10473 | 36117 | 29014 | 22662 |
| 4361  | 3694  | 9592  | 7955  | 6947  |
| 3691  | 4029  | 5881  | 4652  | 2998  |
| 24398 | 30989 | 54195 | 48958 | 43512 |
| 1861  | 966   | 4180  | 3281  | 2339  |
| 4642  | 3818  | 9268  | 7278  | 5911  |
| 30    | 8     | 10    | 4     | 0     |
| 1132  | 1396  | 5273  | 4870  | 3814  |
| 4019  | 5303  | 8894  | 7984  | 7074  |
| 1719  | 885   | 2379  | 2079  | 1606  |
| 472   | 495   | 1645  | 1455  | 1234  |
| 17670 | 28457 | 52442 | 43810 | 44829 |
| 2062  | 2086  | 4119  | 4055  | 3451  |
| 1004  | 861   | 3307  | 1857  | 1905  |
| 38    | 43    | 257   | 227   | 235   |
| 717   | 393   | 1338  | 980   | 747   |
| 69    | 96    | 427   | 433   | 488   |
| 10200 | 10769 | 22186 | 20398 | 17347 |
| 1171  | 1952  | 3605  | 3524  | 2795  |
| 643   | 301   | 1130  | 825   | 580   |
| 5759  | 6777  | 10330 | 5634  | 5295  |
| 723   | 582   | 1999  | 1299  | 1095  |
| 473   | 419   | 724   | 710   | 712   |
| 1351  | 1842  | 3452  | 2412  | 1854  |
| 132   | 180   | 491   | 361   | 415   |
| 1455  | 1373  | 4666  | 4478  | 4465  |
| 5103  | 4945  | 16219 | 17779 | 10772 |
| 1569  | 855   | 2209  | 1554  | 1164  |
| 1742  | 1815  | 2669  | 3105  | 2377  |
| 6109  | 7881  | 15169 | 9470  | 9527  |
| 155   | 38    | 322   | 217   | 167   |
| 1635  | 966   | 3352  | 2559  | 1998  |
| 11127 | 10979 | 29539 | 18405 | 14854 |
| 356   | 555   | 1404  | 1584  | 1139  |
| 336   | 404   | 762   | 746   | 506   |
| 821   | 750   | 3437  | 2860  | 2865  |
| 933   | 814   | 1999  | 1674  | 1277  |
| 664   | 1278  | 1592  | 1182  | 1309  |
| 431   | 231   | 452   | 409   | 273   |

|       |       |       |       |       |
|-------|-------|-------|-------|-------|
| 1584  | 1919  | 4352  | 4871  | 3051  |
| 2783  | 2623  | 9437  | 8701  | 8081  |
| 1186  | 686   | 2121  | 1878  | 1469  |
| 1038  | 1292  | 3472  | 3279  | 2564  |
| 850   | 1104  | 2582  | 2909  | 1789  |
| 8488  | 5676  | 17330 | 14516 | 11409 |
| 1170  | 2235  | 762   | 655   | 693   |
| 31    | 23    | 186   | 131   | 159   |
| 38104 | 53696 | 92232 | 97274 | 72979 |
| 392   | 539   | 1619  | 1607  | 1288  |
| 992   | 1565  | 5219  | 4171  | 3223  |
| 4424  | 5500  | 7889  | 4975  | 4228  |
| 3194  | 2649  | 7339  | 7286  | 6618  |
| 0     | 0     | 1     | 0     | 0     |
| 279   | 335   | 714   | 728   | 558   |
| 11800 | 8900  | 23286 | 16314 | 10041 |
| 426   | 698   | 1837  | 1526  | 1063  |
| 6093  | 6046  | 14911 | 8670  | 8471  |
| 646   | 644   | 1434  | 1022  | 790   |
| 3726  | 2753  | 4325  | 4220  | 2897  |
| 282   | 96    | 435   | 233   | 184   |
| 160   | 78    | 302   | 217   | 150   |
| 1108  | 1046  | 3210  | 2714  | 2085  |
| 484   | 731   | 1142  | 1091  | 769   |
| 404   | 376   | 895   | 492   | 404   |
| 4189  | 3439  | 3770  | 2474  | 1534  |
| 9145  | 17369 | 35241 | 25829 | 27657 |
| 3386  | 4102  | 11125 | 9524  | 7914  |
| 992   | 1338  | 3192  | 2974  | 2223  |
| 19161 | 16743 | 54586 | 40895 | 31546 |
| 858   | 864   | 4144  | 3507  | 2510  |
| 205   | 296   | 312   | 335   | 265   |
| 488   | 498   | 2104  | 1783  | 1073  |
| 995   | 971   | 2700  | 1575  | 1421  |
| 1256  | 877   | 3167  | 2103  | 1791  |
| 1252  | 1165  | 1985  | 1364  | 1337  |
| 1841  | 2362  | 4686  | 4084  | 3518  |
| 101   | 136   | 385   | 390   | 295   |
| 1911  | 1751  | 3947  | 3855  | 3231  |
| 3026  | 3268  | 3763  | 2000  | 1751  |
| 4046  | 4019  | 5065  | 3965  | 3789  |
| 3289  | 3720  | 4643  | 4270  | 3655  |
| 1466  | 1621  | 3938  | 2483  | 2000  |
| 4404  | 4115  | 5099  | 4079  | 3547  |
| 2291  | 2614  | 11638 | 8905  | 8557  |
| 1439  | 587   | 2438  | 1888  | 1863  |
| 1179  | 1232  | 4119  | 3794  | 3056  |
| 9408  | 9198  | 19368 | 13172 | 11919 |
| 704   | 1022  | 2252  | 2014  | 1959  |
| 481   | 299   | 706   | 531   | 364   |
| 519   | 524   | 1268  | 1341  | 1001  |
| 4043  | 4600  | 11752 | 7169  | 7335  |

|        |        |        |        |        |
|--------|--------|--------|--------|--------|
| 1235   | 1271   | 2891   | 1810   | 1807   |
| 1011   | 1080   | 3242   | 3276   | 2535   |
| 1296   | 1547   | 3843   | 3503   | 3148   |
| 1447   | 1878   | 6023   | 5406   | 5047   |
| 1282   | 1507   | 3599   | 3490   | 2914   |
| 5448   | 5892   | 14885  | 10892  | 7509   |
| 2019   | 3143   | 5562   | 5658   | 4523   |
| 104375 | 77365  | 151685 | 120084 | 92159  |
| 4984   | 3073   | 11439  | 8234   | 5942   |
| 3189   | 5445   | 19510  | 15263  | 11856  |
| 9506   | 12721  | 21963  | 17878  | 16773  |
| 34     | 10     | 76     | 43     | 45     |
| 6586   | 4986   | 6884   | 5647   | 4321   |
| 1536   | 1388   | 5098   | 4554   | 3235   |
| 1300   | 1271   | 3499   | 3344   | 2814   |
| 2316   | 1752   | 3094   | 2447   | 2152   |
| 165    | 145    | 480    | 353    | 247    |
| 1304   | 1240   | 4383   | 4144   | 2967   |
| 4228   | 4116   | 11185  | 11655  | 9030   |
| 177    | 307    | 344    | 257    | 212    |
| 5489   | 5443   | 8914   | 6058   | 5681   |
| 393    | 442    | 831    | 532    | 402    |
| 1141   | 1141   | 1694   | 1512   | 1389   |
| 1672   | 1052   | 2314   | 1700   | 1455   |
| 1611   | 1976   | 3062   | 2817   | 2554   |
| 1018   | 1035   | 2593   | 1806   | 1252   |
| 106    | 101    | 306    | 288    | 191    |
| 162    | 95     | 260    | 204    | 132    |
| 873    | 669    | 2371   | 2282   | 1803   |
| 7423   | 8181   | 23244  | 21364  | 18352  |
| 6114   | 8069   | 14272  | 12511  | 10925  |
| 2049   | 2416   | 8695   | 7326   | 6540   |
| 2055   | 2138   | 6423   | 6306   | 5103   |
| 255    | 263    | 656    | 658    | 679    |
| 1170   | 1324   | 2063   | 1372   | 1176   |
| 857    | 878    | 3259   | 2646   | 2012   |
| 1513   | 892    | 2581   | 2044   | 1894   |
| 4828   | 5263   | 19267  | 20370  | 14526  |
| 1518   | 1686   | 5007   | 4469   | 3591   |
| 7448   | 8569   | 28682  | 25357  | 22143  |
| 13383  | 15748  | 35736  | 33066  | 29478  |
| 469    | 486    | 1216   | 916    | 714    |
| 6863   | 7517   | 27317  | 23377  | 22528  |
| 718    | 766    | 1943   | 1763   | 1711   |
| 3662   | 4393   | 8413   | 7564   | 6621   |
| 833    | 1326   | 2203   | 2109   | 1808   |
| 12170  | 8592   | 28704  | 19459  | 13723  |
| 756    | 925    | 3077   | 2244   | 1784   |
| 1865   | 1641   | 2123   | 1463   | 1587   |
| 247065 | 214205 | 497538 | 398637 | 299348 |
| 682    | 759    | 2868   | 2793   | 2178   |
| 5903   | 6557   | 18789  | 18935  | 14337  |

|        |        |        |        |        |
|--------|--------|--------|--------|--------|
| 49083  | 45031  | 105971 | 85615  | 66716  |
| 23088  | 27152  | 38797  | 26146  | 16039  |
| 2161   | 2533   | 7384   | 6658   | 5192   |
| 2891   | 2622   | 11892  | 11094  | 9385   |
| 1928   | 2580   | 8163   | 7289   | 5871   |
| 650    | 401    | 1142   | 849    | 758    |
| 3      | 0      | 59     | 38     | 38     |
| 2022   | 2152   | 4806   | 3000   | 3060   |
| 9385   | 7178   | 13136  | 9039   | 10531  |
| 4372   | 5100   | 13014  | 11829  | 9778   |
| 2469   | 2850   | 9434   | 8692   | 6859   |
| 13013  | 11726  | 20898  | 14858  | 12890  |
| 1553   | 1736   | 5100   | 2606   | 2906   |
| 160    | 234    | 507    | 526    | 363    |
| 2310   | 2457   | 8188   | 7295   | 6241   |
| 2607   | 3113   | 4782   | 2666   | 2430   |
| 238    | 223    | 691    | 575    | 487    |
| 254    | 259    | 743    | 1064   | 897    |
| 2215   | 2389   | 5362   | 3532   | 2780   |
| 4179   | 3160   | 8053   | 6701   | 5609   |
| 26     | 33     | 68     | 45     | 31     |
| 132342 | 110271 | 232998 | 216396 | 147965 |
| 181    | 190    | 281    | 399    | 235    |
| 1648   | 2592   | 4176   | 3928   | 4000   |
| 10884  | 13824  | 18319  | 11066  | 7117   |
| 1612   | 1757   | 3591   | 3372   | 3049   |
| 3195   | 3006   | 7888   | 5068   | 3487   |
| 1747   | 2220   | 4732   | 4618   | 3851   |
| 1040   | 367    | 990    | 868    | 805    |
| 529    | 805    | 1238   | 1315   | 1298   |
| 3342   | 3320   | 8307   | 5809   | 4617   |
| 1085   | 857    | 2186   | 1505   | 1070   |
| 2520   | 2410   | 5112   | 3576   | 2437   |
| 664    | 753    | 1969   | 1816   | 1796   |
| 2241   | 1716   | 4350   | 3070   | 2460   |
| 976    | 971    | 1484   | 1287   | 1106   |
| 855    | 984    | 2257   | 2117   | 1787   |
| 1650   | 1565   | 3160   | 2027   | 1865   |
| 125    | 58     | 153    | 94     | 70     |
| 3104   | 2996   | 7456   | 7091   | 5829   |
| 196    | 312    | 468    | 370    | 449    |
| 1252   | 1030   | 2333   | 1239   | 1233   |
| 1835   | 1828   | 6316   | 5660   | 4879   |
| 50     | 14     | 42     | 40     | 46     |
| 88959  | 81132  | 173106 | 153166 | 105558 |
| 2910   | 3462   | 7831   | 6951   | 6171   |
| 4070   | 6007   | 18215  | 14620  | 10135  |
| 1120   | 1773   | 3424   | 2584   | 1975   |
| 278    | 404    | 1399   | 1229   | 912    |
| 964    | 1008   | 2717   | 1728   | 1500   |
| 1953   | 1711   | 5149   | 4365   | 2339   |
| 2546   | 1936   | 5126   | 4041   | 3107   |

|       |       |        |        |       |
|-------|-------|--------|--------|-------|
| 301   | 328   | 915    | 646    | 589   |
| 14525 | 16271 | 37008  | 27933  | 20808 |
| 221   | 114   | 140    | 202    | 94    |
| 326   | 418   | 1208   | 774    | 1157  |
| 349   | 461   | 850    | 843    | 711   |
| 3227  | 3647  | 10218  | 9139   | 8854  |
| 91    | 129   | 250    | 253    | 159   |
| 8979  | 5594  | 14820  | 11871  | 8641  |
| 329   | 207   | 718    | 671    | 446   |
| 18343 | 22604 | 32082  | 19155  | 22825 |
| 3236  | 2519  | 4672   | 4019   | 2891  |
| 471   | 827   | 1680   | 1599   | 1481  |
| 6479  | 9924  | 16622  | 13927  | 11532 |
| 701   | 311   | 1566   | 1293   | 1028  |
| 385   | 379   | 1657   | 1596   | 1226  |
| 1939  | 1261  | 2359   | 1660   | 1818  |
| 7500  | 5042  | 14318  | 11857  | 9764  |
| 249   | 171   | 221    | 187    | 97    |
| 863   | 823   | 3441   | 3029   | 2518  |
| 2665  | 2982  | 7947   | 7233   | 6274  |
| 1028  | 750   | 2111   | 1834   | 1373  |
| 2305  | 2295  | 7183   | 6748   | 4886  |
| 5179  | 4766  | 20050  | 19456  | 14708 |
| 156   | 69    | 360    | 185    | 135   |
| 8673  | 7020  | 23268  | 17458  | 15113 |
| 8488  | 6671  | 8534   | 12460  | 8353  |
| 1134  | 1335  | 3300   | 2142   | 1658  |
| 1872  | 1822  | 6293   | 5520   | 5320  |
| 2699  | 2749  | 11459  | 10294  | 8116  |
| 1754  | 2394  | 8238   | 7211   | 5800  |
| 3912  | 4825  | 11821  | 10199  | 9383  |
| 2680  | 3025  | 7344   | 7800   | 6156  |
| 527   | 315   | 660    | 561    | 369   |
| 2815  | 2438  | 6397   | 4818   | 3285  |
| 57414 | 49685 | 140880 | 108464 | 86019 |
| 189   | 299   | 177    | 124    | 102   |
| 700   | 401   | 1046   | 1219   | 1044  |
| 2861  | 4079  | 6252   | 4830   | 3406  |
| 129   | 47    | 628    | 571    | 515   |
| 1150  | 1320  | 2720   | 2033   | 1913  |
| 434   | 417   | 1207   | 866    | 614   |
| 353   | 533   | 407    | 392    | 415   |
| 27    | 4     | 59     | 41     | 19    |
| 1627  | 1593  | 3921   | 2357   | 1965  |
| 2203  | 1506  | 3788   | 3188   | 2168  |
| 55641 | 71975 | 122396 | 82191  | 56222 |
| 66    | 105   | 541    | 617    | 482   |
| 80    | 171   | 358    | 345    | 207   |
| 39    | 44    | 306    | 278    | 183   |
| 60    | 65    | 143    | 125    | 104   |
| 8244  | 9107  | 17583  | 14944  | 10691 |
| 305   | 155   | 599    | 360    | 329   |



|        |        |        |        |        |
|--------|--------|--------|--------|--------|
| 917    | 634    | 1788   | 1570   | 1180   |
| 290    | 132    | 268    | 235    | 130    |
| 846    | 883    | 1151   | 761    | 726    |
| 1019   | 642    | 1972   | 1245   | 1031   |
| 1167   | 1640   | 3397   | 3700   | 3264   |
| 1896   | 2136   | 5609   | 5312   | 4381   |
| 786    | 898    | 2294   | 2015   | 1524   |
| 50     | 71     | 185    | 186    | 168    |
| 18326  | 15027  | 39539  | 34753  | 27841  |
| 1355   | 1530   | 4519   | 4818   | 3544   |
| 1582   | 1806   | 3636   | 2281   | 2020   |
| 2017   | 2872   | 4534   | 4293   | 3961   |
| 1638   | 2661   | 4279   | 3317   | 2073   |
| 2099   | 2000   | 3898   | 2875   | 2183   |
| 5369   | 7630   | 29831  | 26906  | 22327  |
| 8199   | 5545   | 14595  | 12231  | 7443   |
| 683    | 1194   | 2411   | 1377   | 1280   |
| 2447   | 3662   | 11338  | 10421  | 8020   |
| 409    | 263    | 638    | 488    | 348    |
| 6458   | 5517   | 15324  | 11926  | 8021   |
| 1135   | 1337   | 3822   | 3560   | 3212   |
| 14163  | 15811  | 29668  | 18476  | 17338  |
| 417    | 953    | 2291   | 2214   | 1734   |
| 2895   | 1649   | 6254   | 4606   | 3676   |
| 1083   | 1467   | 4210   | 3158   | 2589   |
| 10966  | 12175  | 30634  | 20393  | 16321  |
| 347    | 264    | 1124   | 1017   | 838    |
| 1449   | 1230   | 4152   | 2854   | 1925   |
| 4285   | 4442   | 10929  | 6562   | 6116   |
| 196    | 172    | 411    | 413    | 366    |
| 1381   | 1570   | 4427   | 3974   | 4129   |
| 194    | 188    | 676    | 856    | 512    |
| 1896   | 2337   | 3093   | 2557   | 2164   |
| 243    | 173    | 351    | 257    | 177    |
| 1012   | 1178   | 2683   | 2551   | 2037   |
| 1198   | 1189   | 3643   | 2244   | 2039   |
| 543    | 739    | 2138   | 1807   | 1476   |
| 4142   | 4011   | 8459   | 6629   | 6103   |
| 42     | 7      | 45     | 26     | 15     |
| 140284 | 158156 | 435550 | 297567 | 235518 |
| 51869  | 62921  | 141272 | 92499  | 75099  |
| 2828   | 3269   | 7059   | 7049   | 7108   |
| 1239   | 1522   | 2977   | 1975   | 1757   |
| 820    | 867    | 3666   | 3499   | 2959   |
| 840    | 1154   | 2285   | 2229   | 1701   |
| 2399   | 2582   | 6718   | 6094   | 5454   |
| 4894   | 2964   | 5572   | 5390   | 4322   |
| 13513  | 9373   | 25396  | 14502  | 8886   |
| 2027   | 2122   | 7520   | 7389   | 5671   |
| 100    | 140    | 308    | 257    | 190    |
| 1924   | 2081   | 5117   | 3152   | 2814   |
| 2007   | 2246   | 5720   | 3165   | 3144   |

|       |       |       |       |       |
|-------|-------|-------|-------|-------|
| 1476  | 1400  | 5208  | 5174  | 3782  |
| 1222  | 1281  | 3677  | 3590  | 3249  |
| 1879  | 2657  | 6130  | 3942  | 3677  |
| 97    | 122   | 172   | 158   | 118   |
| 1854  | 2432  | 4369  | 2688  | 2508  |
| 1151  | 1112  | 4435  | 4323  | 3643  |
| 366   | 409   | 453   | 272   | 197   |
| 56    | 77    | 175   | 287   | 140   |
| 1379  | 2252  | 7391  | 6350  | 5485  |
| 2731  | 3174  | 8282  | 6178  | 5140  |
| 11998 | 11881 | 28574 | 24457 | 16911 |
| 459   | 538   | 1349  | 1011  | 787   |
| 1170  | 1856  | 4829  | 4978  | 3986  |
| 290   | 420   | 712   | 638   | 544   |
| 679   | 638   | 1934  | 1409  | 1084  |
| 5503  | 8945  | 13083 | 7813  | 6329  |
| 2616  | 2594  | 5137  | 3536  | 2957  |
| 1108  | 1405  | 3561  | 2245  | 2201  |
| 3477  | 4732  | 10977 | 9234  | 8739  |
| 107   | 300   | 1378  | 1163  | 1103  |
| 1812  | 1047  | 5319  | 4112  | 2862  |
| 2376  | 2127  | 4511  | 5307  | 3635  |
| 3008  | 2142  | 5342  | 3874  | 3247  |
| 2184  | 2669  | 4554  | 4173  | 3791  |
| 2617  | 3016  | 8402  | 7376  | 6818  |
| 2294  | 3330  | 7808  | 4948  | 4455  |
| 11262 | 17609 | 19660 | 16360 | 14123 |
| 800   | 771   | 2373  | 2243  | 1990  |
| 7277  | 9130  | 23011 | 12787 | 13408 |
| 5733  | 4887  | 11895 | 9040  | 7438  |
| 656   | 624   | 1345  | 1310  | 993   |
| 1     | 12    | 13    | 13    | 7     |
| 646   | 471   | 876   | 676   | 532   |
| 226   | 311   | 904   | 679   | 658   |
| 1185  | 1248  | 1931  | 1497  | 1288  |
| 2827  | 1107  | 3347  | 2923  | 2105  |
| 777   | 485   | 1293  | 1015  | 878   |
| 1336  | 1821  | 5879  | 6067  | 4560  |
| 3323  | 3378  | 11165 | 9271  | 8932  |
| 539   | 529   | 1949  | 1806  | 1547  |
| 4149  | 4825  | 16017 | 14374 | 11878 |
| 7397  | 8514  | 23440 | 27385 | 28875 |
| 13974 | 12973 | 23055 | 16129 | 13739 |
| 171   | 177   | 384   | 159   | 213   |
| 383   | 411   | 932   | 929   | 618   |
| 885   | 656   | 2426  | 1779  | 2210  |
| 11504 | 10911 | 19857 | 16757 | 14842 |
| 1768  | 1516  | 6312  | 4374  | 3058  |
| 3332  | 3659  | 8554  | 4925  | 5133  |
| 9827  | 12891 | 36537 | 29824 | 20197 |
| 7157  | 8949  | 18733 | 17583 | 14916 |
| 1068  | 616   | 1702  | 1482  | 1250  |

|       |       |       |       |       |
|-------|-------|-------|-------|-------|
| 2401  | 2131  | 7154  | 5444  | 4255  |
| 3283  | 3823  | 9659  | 5767  | 5371  |
| 4964  | 6157  | 13016 | 11966 | 11892 |
| 342   | 597   | 839   | 804   | 660   |
| 2015  | 2623  | 7095  | 4388  | 3809  |
| 1396  | 1461  | 2968  | 2024  | 1867  |
| 2509  | 2939  | 6605  | 6596  | 5868  |
| 669   | 614   | 2225  | 2093  | 1591  |
| 3619  | 4694  | 12256 | 11149 | 9956  |
| 1027  | 1136  | 2537  | 2221  | 1978  |
| 2216  | 2097  | 5681  | 5578  | 4493  |
| 772   | 1059  | 2753  | 2691  | 2408  |
| 1701  | 1822  | 4351  | 4078  | 3609  |
| 3471  | 2655  | 6014  | 5165  | 4577  |
| 373   | 247   | 267   | 242   | 263   |
| 254   | 300   | 1083  | 1134  | 721   |
| 1730  | 2300  | 3329  | 2882  | 2742  |
| 2298  | 3331  | 10606 | 8628  | 7380  |
| 366   | 569   | 1463  | 1363  | 1053  |
| 7146  | 7998  | 14086 | 8534  | 6989  |
| 350   | 253   | 1098  | 780   | 662   |
| 709   | 542   | 2004  | 1996  | 1334  |
| 724   | 999   | 2801  | 2425  | 2217  |
| 3273  | 699   | 4627  | 3723  | 2613  |
| 172   | 323   | 625   | 489   | 343   |
| 268   | 467   | 1259  | 1350  | 758   |
| 256   | 315   | 774   | 782   | 695   |
| 387   | 330   | 863   | 1014  | 1074  |
| 6295  | 6473  | 12152 | 8423  | 7620  |
| 754   | 898   | 2250  | 1232  | 1125  |
| 6     | 30    | 38    | 62    | 37    |
| 1643  | 931   | 2742  | 2199  | 1568  |
| 726   | 394   | 1807  | 1248  | 984   |
| 381   | 420   | 1101  | 640   | 483   |
| 1295  | 1440  | 3715  | 3022  | 2512  |
| 82    | 32    | 217   | 166   | 161   |
| 4360  | 6033  | 15227 | 12499 | 14792 |
| 466   | 502   | 1365  | 1444  | 1165  |
| 6266  | 7429  | 17513 | 16500 | 15136 |
| 147   | 137   | 277   | 144   | 149   |
| 860   | 1187  | 2784  | 2685  | 2243  |
| 2520  | 2507  | 7364  | 6571  | 5468  |
| 930   | 865   | 2770  | 2037  | 1536  |
| 8155  | 10020 | 26321 | 24557 | 24559 |
| 403   | 490   | 1236  | 1220  | 1130  |
| 41999 | 51938 | 87625 | 80527 | 78528 |
| 533   | 605   | 1011  | 836   | 711   |
| 2999  | 3439  | 7088  | 5612  | 4831  |
| 795   | 594   | 1592  | 1259  | 907   |
| 96    | 104   | 173   | 70    | 83    |
| 689   | 461   | 1505  | 989   | 1012  |
| 7170  | 8735  | 20357 | 13065 | 11885 |

|        |        |        |        |        |
|--------|--------|--------|--------|--------|
| 9294   | 10797  | 25633  | 22383  | 19064  |
| 2950   | 2247   | 8487   | 7322   | 4975   |
| 114041 | 130627 | 182314 | 154423 | 120090 |
| 3564   | 4163   | 7036   | 4146   | 4129   |
| 2251   | 2338   | 7294   | 6685   | 5455   |
| 154    | 228    | 950    | 964    | 805    |
| 2055   | 2423   | 8846   | 7893   | 6300   |
| 7653   | 8102   | 16980  | 12178  | 9751   |
| 643    | 727    | 2029   | 1903   | 1606   |
| 1400   | 1360   | 5435   | 3219   | 2351   |
| 954    | 978    | 2949   | 2794   | 2299   |
| 447    | 322    | 910    | 670    | 618    |
| 731    | 628    | 1019   | 788    | 762    |
| 1251   | 1039   | 5067   | 3429   | 2257   |
| 747    | 502    | 1184   | 981    | 595    |
| 513    | 820    | 1346   | 1367   | 1064   |
| 36375  | 44416  | 63244  | 41110  | 27216  |
| 2283   | 2764   | 8716   | 5701   | 4864   |
| 1422   | 1953   | 4363   | 3573   | 3213   |
| 4450   | 5405   | 10086  | 9228   | 9057   |
| 388    | 537    | 1047   | 644    | 507    |
| 1656   | 1709   | 4793   | 4602   | 4396   |
| 1028   | 1008   | 2689   | 1667   | 1476   |
| 13118  | 21727  | 24847  | 17667  | 10596  |
| 2732   | 1844   | 5599   | 4693   | 3440   |
| 773    | 797    | 2757   | 2561   | 1857   |
| 2662   | 1944   | 3672   | 3040   | 2379   |
| 4840   | 3572   | 10193  | 8024   | 6314   |
| 24096  | 37246  | 34288  | 21457  | 14964  |
| 2041   | 2231   | 4888   | 4919   | 3745   |
| 1181   | 1576   | 2638   | 2442   | 2079   |
| 765    | 402    | 1377   | 1003   | 724    |
| 1044   | 910    | 1587   | 1072   | 1036   |
| 483    | 421    | 1101   | 818    | 677    |
| 14894  | 16733  | 71923  | 66297  | 40552  |
| 1411   | 1714   | 2743   | 2535   | 2338   |
| 3937   | 4819   | 8673   | 5232   | 4857   |
| 7784   | 5525   | 9025   | 7850   | 6566   |
| 223    | 440    | 1201   | 1159   | 802    |
| 1004   | 1355   | 3831   | 2205   | 2368   |
| 249    | 315    | 612    | 504    | 455    |
| 410    | 721    | 1769   | 1457   | 1246   |
| 204    | 249    | 437    | 441    | 371    |
| 7731   | 9073   | 20994  | 12592  | 13142  |
| 76     | 96     | 426    | 440    | 294    |
| 369    | 533    | 1182   | 744    | 518    |
| 834    | 1111   | 1738   | 1065   | 1159   |
| 690    | 790    | 2226   | 1923   | 1745   |
| 719    | 1095   | 1801   | 1113   | 908    |
| 91     | 10     | 142    | 71     | 48     |
| 3005   | 3068   | 7266   | 4275   | 4311   |
| 11487  | 13059  | 35901  | 31723  | 26514  |

| 0      | 0      | 7       | 6       | 7      |
|--------|--------|---------|---------|--------|
| 6775   | 5511   | 11668   | 9386    | 6556   |
| 8488   | 8817   | 31274   | 27841   | 22359  |
| 462857 | 420807 | 1692083 | 1414388 | 915283 |
| 2805   | 3341   | 9196    | 8320    | 6852   |
| 8766   | 13900  | 30332   | 27945   | 32736  |
| 1013   | 1025   | 1608    | 1055    | 878    |
| 5680   | 6456   | 10963   | 7321    | 5973   |
| 308    | 331    | 773     | 513     | 423    |
| 767    | 894    | 2627    | 2507    | 1867   |
| 5687   | 6289   | 13710   | 8583    | 6818   |
| 546    | 612    | 1413    | 1154    | 1141   |
| 25477  | 21606  | 79483   | 56943   | 39881  |
| 745    | 617    | 1551    | 1297    | 930    |
| 6151   | 9283   | 11600   | 9669    | 9571   |
| 1663   | 2439   | 3662    | 3538    | 3139   |
| 10646  | 10875  | 24085   | 14354   | 16359  |
| 2933   | 3545   | 8279    | 4986    | 5114   |
| 214    | 117    | 595     | 523     | 548    |
| 184    | 193    | 171     | 132     | 134    |
| 2561   | 3427   | 4091    | 4088    | 3916   |
| 3476   | 4748   | 9601    | 9365    | 7360   |
| 274    | 245    | 807     | 730     | 622    |
| 2103   | 3419   | 9297    | 7513    | 6895   |
| 292    | 372    | 587     | 693     | 703    |
| 1006   | 1097   | 2110    | 1272    | 1314   |
| 312    | 344    | 717     | 712     | 683    |
| 65     | 38     | 35      | 37      | 44     |
| 3197   | 2575   | 5059    | 3803    | 3000   |
| 1592   | 1406   | 1950    | 1773    | 1104   |
| 2244   | 2598   | 7087    | 6365    | 5338   |
| 284    | 286    | 1092    | 1411    | 812    |
| 1209   | 1525   | 2626    | 2356    | 2414   |
| 12027  | 12185  | 35413   | 25274   | 21773  |
| 9122   | 12699  | 26704   | 23082   | 19938  |
| 1032   | 1017   | 2258    | 2022    | 1731   |
| 19871  | 26293  | 83887   | 71319   | 64199  |
| 8366   | 8765   | 19621   | 13769   | 11808  |
| 1693   | 2995   | 6374    | 5454    | 6016   |
| 294    | 472    | 1210    | 1004    | 805    |
| 1030   | 1196   | 1588    | 1227    | 960    |
| 396    | 186    | 528     | 407     | 360    |
| 1875   | 1426   | 5254    | 3735    | 3120   |
| 20976  | 24211  | 59449   | 52351   | 49548  |
| 1761   | 2461   | 7203    | 6497    | 5728   |
| 876    | 1123   | 2577    | 2453    | 1744   |
| 1952   | 1532   | 3527    | 3666    | 2713   |
| 4825   | 5230   | 14262   | 8782    | 7898   |
| 1141   | 1203   | 2062    | 1570    | 1146   |
| 6881   | 10094  | 18645   | 16483   | 14279  |
| 1373   | 1817   | 6295    | 4163    | 3520   |
| 92     | 257    | 408     | 406     | 322    |

|        |        |         |        |        |
|--------|--------|---------|--------|--------|
| 448    | 440    | 2079    | 1854   | 1592   |
| 3564   | 4013   | 10999   | 9534   | 8637   |
| 374    | 576    | 2601    | 2080   | 1295   |
| 9443   | 7362   | 12157   | 17734  | 11423  |
| 1088   | 564    | 849     | 747    | 700    |
| 13     | 15     | 8       | 2      | 0      |
| 424064 | 415539 | 1033443 | 865855 | 573577 |
| 5655   | 4905   | 16432   | 12402  | 9289   |
| 958    | 476    | 1485    | 1316   | 1137   |
| 911    | 833    | 4028    | 3519   | 2732   |
| 1979   | 1899   | 3394    | 2646   | 2093   |
| 2301   | 2217   | 4259    | 2844   | 2612   |
| 35679  | 33120  | 59748   | 54695  | 31225  |
| 156    | 50     | 246     | 124    | 140    |
| 781    | 689    | 2033    | 1314   | 1195   |
| 1147   | 475    | 1750    | 1338   | 1263   |
| 544    | 607    | 2555    | 1685   | 1300   |
| 2229   | 2419   | 7831    | 7936   | 7439   |
| 747    | 977    | 1590    | 1398   | 1346   |
| 2866   | 2924   | 6521    | 4127   | 3899   |
| 6903   | 8338   | 18741   | 11645  | 11618  |
| 498    | 620    | 2405    | 2492   | 1517   |
| 1745   | 1229   | 2628    | 2163   | 1661   |
| 7707   | 7725   | 36734   | 33826  | 25825  |
| 3234   | 3651   | 9323    | 8779   | 7832   |
| 4831   | 8342   | 24056   | 18382  | 13574  |
| 0      | 2      | 12      | 18     | 6      |
| 1468   | 1685   | 3471    | 2454   | 2077   |
| 507    | 333    | 1043    | 879    | 738    |
| 3724   | 3596   | 8138    | 5131   | 4906   |
| 1312   | 1562   | 3153    | 2877   | 2727   |
| 25     | 13     | 29      | 12     | 11     |
| 4301   | 3644   | 10968   | 7541   | 6757   |
| 1000   | 1524   | 2818    | 2546   | 2638   |
| 1193   | 1713   | 5471    | 4564   | 3884   |
| 1034   | 479    | 1416    | 1175   | 813    |
| 4108   | 5863   | 12184   | 7269   | 7271   |
| 172    | 227    | 744     | 641    | 461    |
| 4022   | 5500   | 22313   | 19656  | 16035  |
| 760    | 593    | 2004    | 1449   | 1174   |
| 2914   | 5399   | 10713   | 7369   | 5808   |
| 1645   | 2093   | 4662    | 2737   | 2296   |
| 11090  | 12590  | 22740   | 14570  | 13272  |
| 818    | 776    | 2254    | 1353   | 1268   |
| 545    | 569    | 1842    | 1934   | 1533   |
| 387    | 498    | 1438    | 1128   | 838    |
| 1586   | 1535   | 2930    | 2424   | 1791   |
| 5      | 0      | 0       | 0      | 0      |
| 1454   | 1236   | 3792    | 2705   | 2332   |
| 5537   | 6000   | 13355   | 9055   | 7139   |
| 702    | 380    | 1510    | 1097   | 795    |
| 3571   | 5884   | 16815   | 13184  | 11568  |

|       |       |       |       |       |
|-------|-------|-------|-------|-------|
| 1174  | 1194  | 2221  | 2186  | 1871  |
| 780   | 900   | 2090  | 1906  | 1666  |
| 285   | 294   | 1012  | 965   | 845   |
| 940   | 948   | 3362  | 3347  | 2362  |
| 6048  | 5620  | 24906 | 26277 | 24306 |
| 8155  | 9874  | 22349 | 20000 | 17473 |
| 1275  | 912   | 1701  | 1468  | 1205  |
| 636   | 675   | 1521  | 1480  | 1076  |
| 8209  | 9637  | 23162 | 13423 | 13403 |
| 628   | 943   | 2205  | 2025  | 1630  |
| 978   | 1152  | 3497  | 2101  | 1900  |
| 1044  | 1443  | 3272  | 2968  | 2516  |
| 586   | 850   | 2777  | 2061  | 1973  |
| 674   | 493   | 1322  | 966   | 878   |
| 4748  | 4959  | 11393 | 8823  | 9839  |
| 1509  | 1345  | 3940  | 2589  | 2456  |
| 4217  | 4438  | 11682 | 7391  | 6718  |
| 3989  | 5565  | 10402 | 8083  | 5609  |
| 2180  | 2548  | 10028 | 9353  | 8720  |
| 1654  | 1573  | 3593  | 3388  | 2705  |
| 2627  | 2506  | 8488  | 7517  | 6315  |
| 5490  | 5373  | 15725 | 13439 | 11478 |
| 976   | 1305  | 2863  | 2768  | 2484  |
| 2767  | 2712  | 8764  | 4996  | 4885  |
| 540   | 386   | 848   | 719   | 584   |
| 2098  | 2459  | 6490  | 6257  | 5805  |
| 3675  | 3669  | 7771  | 6862  | 5267  |
| 17445 | 24651 | 61967 | 54461 | 41518 |
| 474   | 449   | 1047  | 822   | 652   |
| 279   | 363   | 1186  | 937   | 874   |
| 238   | 367   | 1014  | 946   | 657   |
| 5734  | 6982  | 30986 | 27807 | 22285 |
| 1139  | 1301  | 2880  | 2219  | 1915  |
| 567   | 694   | 1548  | 1340  | 1201  |
| 10029 | 16253 | 38931 | 39733 | 30072 |
| 1599  | 1678  | 4195  | 3868  | 3373  |
| 6223  | 7976  | 15232 | 14222 | 12588 |
| 859   | 1172  | 2911  | 2749  | 2274  |
| 1517  | 1812  | 7591  | 7076  | 6391  |
| 722   | 917   | 1557  | 1431  | 1180  |
| 124   | 72    | 475   | 531   | 403   |
| 105   | 169   | 473   | 511   | 468   |
| 2459  | 1314  | 2725  | 2632  | 2274  |
| 813   | 599   | 2556  | 2133  | 2017  |
| 11402 | 12971 | 34369 | 20205 | 19897 |
| 12650 | 16835 | 13627 | 8584  | 9628  |
| 1817  | 1392  | 3307  | 2845  | 2235  |
| 4962  | 5867  | 14661 | 11630 | 10312 |
| 1804  | 2300  | 6472  | 5980  | 4238  |
| 167   | 62    | 406   | 357   | 265   |
| 9420  | 13299 | 24957 | 21157 | 18757 |
| 149   | 238   | 652   | 620   | 549   |

|       |       |        |       |       |
|-------|-------|--------|-------|-------|
| 803   | 1002  | 3202   | 2985  | 2465  |
| 24    | 1     | 30     | 26    | 23    |
| 1805  | 2207  | 4514   | 4184  | 4367  |
| 2944  | 3622  | 4630   | 2699  | 2667  |
| 1499  | 1542  | 2063   | 1263  | 1124  |
| 124   | 66    | 259    | 197   | 128   |
| 5828  | 7187  | 20266  | 18784 | 16341 |
| 1272  | 1243  | 2364   | 1453  | 1656  |
| 1899  | 2410  | 8451   | 6770  | 5718  |
| 6130  | 3529  | 6472   | 5390  | 3964  |
| 1919  | 1448  | 5006   | 3666  | 2846  |
| 246   | 369   | 1137   | 1056  | 964   |
| 957   | 1276  | 1492   | 1218  | 887   |
| 266   | 303   | 439    | 384   | 263   |
| 4429  | 4437  | 12372  | 10879 | 9599  |
| 52    | 30    | 243    | 232   | 212   |
| 4803  | 6156  | 12671  | 11461 | 9551  |
| 48909 | 38002 | 109330 | 83877 | 62270 |
| 4491  | 5237  | 15057  | 13706 | 13897 |
| 1287  | 701   | 1506   | 1119  | 987   |
| 947   | 822   | 3390   | 2928  | 2462  |
| 2999  | 3819  | 7544   | 6531  | 5401  |
| 1681  | 1921  | 3728   | 2224  | 2402  |
| 157   | 125   | 302    | 437   | 322   |
| 4576  | 5282  | 15246  | 14006 | 11586 |
| 593   | 1141  | 2156   | 2128  | 1588  |
| 260   | 134   | 412    | 376   | 219   |
| 206   | 230   | 551    | 609   | 438   |
| 645   | 542   | 865    | 923   | 831   |
| 312   | 333   | 1156   | 1053  | 884   |
| 1579  | 1695  | 5422   | 4861  | 3586  |
| 2275  | 1921  | 4084   | 3404  | 2120  |
| 42    | 39    | 119    | 272   | 62    |
| 349   | 179   | 384    | 266   | 219   |
| 1405  | 1056  | 1882   | 1749  | 1757  |
| 990   | 1176  | 2225   | 1421  | 1514  |
| 0     | 5     | 5      | 11    | 12    |
| 492   | 724   | 1376   | 1204  | 949   |
| 803   | 1026  | 1917   | 1891  | 1523  |
| 4192  | 4433  | 19822  | 17622 | 16169 |
| 648   | 493   | 2664   | 2770  | 2029  |
| 503   | 763   | 1394   | 1037  | 895   |
| 11701 | 11764 | 29252  | 18543 | 17071 |
| 40    | 0     | 44     | 7     | 17    |
| 4160  | 3857  | 17565  | 13950 | 10262 |
| 38    | 4     | 47     | 13    | 21    |
| 610   | 575   | 2222   | 2291  | 1612  |
| 2270  | 1990  | 5017   | 3565  | 2831  |
| 996   | 1357  | 3112   | 2406  | 2169  |
| 906   | 1012  | 3587   | 3581  | 2315  |
| 554   | 486   | 761    | 687   | 635   |
| 962   | 706   | 1671   | 1310  | 1235  |



|       |       |       |       |       |
|-------|-------|-------|-------|-------|
| 130   | 44    | 101   | 75    | 74    |
| 1921  | 2072  | 4226  | 3829  | 3498  |
| 313   | 391   | 937   | 777   | 765   |
| 1901  | 1868  | 3428  | 2418  | 2033  |
| 1034  | 1179  | 1771  | 1052  | 972   |
| 992   | 1247  | 2001  | 1356  | 1221  |
| 19404 | 25002 | 57527 | 50796 | 49863 |
| 444   | 694   | 879   | 852   | 836   |
| 740   | 978   | 2743  | 2667  | 2532  |
| 890   | 677   | 1801  | 1539  | 963   |
| 2086  | 2802  | 6664  | 5869  | 5112  |
| 7269  | 7478  | 16649 | 15221 | 12769 |
| 937   | 775   | 2745  | 2060  | 1790  |
| 12349 | 13923 | 32598 | 32272 | 33877 |
| 3808  | 4428  | 9727  | 6239  | 6368  |
| 2052  | 2210  | 6322  | 5428  | 4730  |
| 306   | 417   | 606   | 668   | 364   |
| 228   | 116   | 411   | 437   | 234   |
| 2016  | 1946  | 5523  | 4036  | 3535  |
| 74    | 30    | 61    | 30    | 217   |
| 2474  | 2585  | 4152  | 3380  | 2767  |
| 6605  | 6831  | 16813 | 16748 | 13389 |
| 1418  | 1328  | 2940  | 2365  | 2189  |
| 3263  | 3060  | 6796  | 5996  | 5052  |
| 32    | 21    | 11    | 10    | 9     |
| 7737  | 5261  | 22182 | 18381 | 14145 |
| 523   | 496   | 1332  | 648   | 923   |
| 1802  | 1994  | 6252  | 5509  | 4624  |
| 29749 | 30280 | 84002 | 66162 | 53558 |
| 2072  | 1883  | 5513  | 3923  | 3112  |
| 528   | 393   | 2046  | 2284  | 1695  |
| 1327  | 1309  | 4915  | 4421  | 3177  |
| 28    | 21    | 14    | 35    | 8     |
| 3523  | 3645  | 7778  | 6046  | 6299  |
| 1302  | 1409  | 3536  | 3516  | 3306  |
| 182   | 338   | 323   | 249   | 242   |
| 367   | 191   | 856   | 612   | 463   |
| 477   | 692   | 1902  | 1698  | 1397  |
| 1477  | 1757  | 2662  | 2271  | 2028  |
| 121   | 345   | 394   | 303   | 381   |
| 18190 | 26992 | 89589 | 54269 | 46950 |
| 2025  | 1922  | 3441  | 2220  | 2124  |
| 13133 | 15021 | 34253 | 31571 | 27721 |
| 11728 | 13316 | 25529 | 15520 | 15906 |
| 1105  | 1016  | 2699  | 2414  | 2246  |
| 23844 | 23416 | 52290 | 42275 | 31685 |
| 676   | 557   | 258   | 290   | 376   |
| 406   | 470   | 1152  | 935   | 671   |
| 1977  | 1865  | 5125  | 3272  | 3181  |
| 278   | 361   | 1249  | 694   | 648   |
| 798   | 904   | 1805  | 1797  | 1282  |
| 4157  | 4612  | 8476  | 7915  | 6620  |

|       |       |       |       |       |
|-------|-------|-------|-------|-------|
| 1331  | 1260  | 3481  | 2813  | 1864  |
| 298   | 536   | 587   | 371   | 271   |
| 604   | 811   | 1487  | 747   | 743   |
| 620   | 800   | 1606  | 1580  | 1023  |
| 1875  | 1344  | 2952  | 2059  | 2016  |
| 672   | 327   | 1450  | 1134  | 845   |
| 280   | 268   | 710   | 323   | 376   |
| 674   | 761   | 1731  | 1368  | 1220  |
| 11587 | 12471 | 31604 | 29668 | 24311 |
| 71    | 88    | 234   | 323   | 191   |
| 292   | 417   | 1632  | 1626  | 1456  |
| 2921  | 3957  | 3969  | 3480  | 3348  |
| 697   | 907   | 1592  | 1390  | 1167  |
| 1034  | 1548  | 3291  | 2552  | 2161  |
| 1999  | 2243  | 6278  | 5728  | 4900  |
| 470   | 695   | 1060  | 960   | 719   |
| 183   | 264   | 355   | 254   | 177   |
| 4353  | 4611  | 9289  | 7339  | 5196  |
| 319   | 380   | 724   | 545   | 479   |
| 1105  | 1353  | 4946  | 4674  | 4817  |
| 1896  | 2532  | 6071  | 5764  | 4547  |
| 2035  | 2391  | 6962  | 4205  | 3500  |
| 14590 | 13106 | 29114 | 23415 | 15215 |
| 21013 | 19073 | 43808 | 44355 | 38492 |
| 1027  | 957   | 1461  | 930   | 907   |
| 2059  | 1288  | 5044  | 5006  | 3994  |
| 216   | 277   | 1041  | 743   | 950   |
| 1754  | 2116  | 4765  | 4823  | 3312  |
| 2207  | 2791  | 10295 | 8675  | 7649  |
| 1299  | 891   | 2696  | 2118  | 1549  |
| 756   | 897   | 2323  | 2568  | 2041  |
| 549   | 749   | 1486  | 1379  | 1135  |
| 3906  | 3339  | 10359 | 8685  | 6106  |
| 494   | 634   | 657   | 523   | 543   |
| 525   | 708   | 2107  | 2021  | 1665  |
| 534   | 548   | 1546  | 1609  | 1202  |
| 25    | 42    | 146   | 156   | 103   |
| 3866  | 2024  | 4054  | 3265  | 2817  |
| 1459  | 1778  | 5873  | 3740  | 3488  |
| 404   | 370   | 988   | 1070  | 835   |
| 1428  | 2178  | 4548  | 3908  | 3521  |
| 21854 | 27352 | 54735 | 51167 | 46134 |
| 587   | 413   | 1409  | 1386  | 842   |
| 3073  | 2620  | 6538  | 5017  | 3468  |
| 4841  | 4231  | 10077 | 8269  | 6458  |
| 3465  | 3138  | 6103  | 4702  | 4442  |
| 3342  | 3608  | 14450 | 13520 | 11847 |
| 1636  | 2141  | 4391  | 3691  | 3170  |
| 344   | 428   | 1106  | 864   | 660   |
| 393   | 440   | 1442  | 1423  | 1187  |
| 115   | 210   | 518   | 515   | 433   |
| 1524  | 2629  | 6139  | 5523  | 5114  |

|       |       |        |        |       |
|-------|-------|--------|--------|-------|
| 914   | 748   | 3108   | 2089   | 1724  |
| 4840  | 5157  | 15123  | 13505  | 11131 |
| 1021  | 1012  | 2398   | 2269   | 1731  |
| 1105  | 1480  | 4659   | 2934   | 2699  |
| 1297  | 1176  | 2976   | 2890   | 2652  |
| 3     | 15    | 46     | 28     | 39    |
| 438   | 670   | 2990   | 2401   | 2057  |
| 1488  | 1202  | 3419   | 2501   | 1783  |
| 2356  | 2142  | 3451   | 2687   | 2285  |
| 230   | 98    | 273    | 223    | 152   |
| 1287  | 1673  | 4542   | 4070   | 3595  |
| 843   | 1057  | 2813   | 1482   | 1693  |
| 2325  | 3416  | 7581   | 6492   | 5974  |
| 693   | 657   | 1826   | 1742   | 1191  |
| 4379  | 5527  | 13377  | 11352  | 10679 |
| 93    | 144   | 343    | 236    | 283   |
| 1508  | 1626  | 5043   | 5161   | 4233  |
| 16636 | 23936 | 79985  | 57317  | 47586 |
| 512   | 797   | 1747   | 1269   | 1016  |
| 196   | 116   | 873    | 785    | 771   |
| 256   | 248   | 418    | 457    | 335   |
| 1589  | 1813  | 5507   | 5205   | 4494  |
| 103   | 78    | 164    | 270    | 144   |
| 587   | 762   | 1549   | 982    | 1028  |
| 159   | 240   | 1241   | 1161   | 846   |
| 1062  | 1667  | 5001   | 4284   | 3716  |
| 2567  | 3006  | 8816   | 7876   | 7145  |
| 2917  | 3635  | 9086   | 6114   | 4947  |
| 1420  | 1518  | 2878   | 2403   | 2194  |
| 1088  | 1077  | 3674   | 3350   | 2869  |
| 21574 | 32127 | 97843  | 75095  | 55598 |
| 298   | 131   | 334    | 400    | 244   |
| 645   | 881   | 1904   | 1635   | 1872  |
| 2261  | 2065  | 3466   | 2799   | 2518  |
| 1836  | 2203  | 6257   | 3610   | 3893  |
| 40    | 63    | 221    | 280    | 210   |
| 1014  | 1035  | 2819   | 2915   | 1869  |
| 1092  | 1085  | 3461   | 2399   | 1688  |
| 15    | 40    | 78     | 83     | 89    |
| 6997  | 5984  | 14009  | 10537  | 9452  |
| 227   | 269   | 480    | 319    | 317   |
| 1169  | 1032  | 2784   | 2823   | 2240  |
| 234   | 302   | 527    | 412    | 338   |
| 397   | 338   | 1020   | 1159   | 1034  |
| 5191  | 2490  | 5396   | 5545   | 4174  |
| 7125  | 9420  | 15994  | 13727  | 12832 |
| 66196 | 54137 | 146005 | 111520 | 83553 |
| 1379  | 1628  | 4408   | 4209   | 3586  |
| 915   | 665   | 1261   | 1074   | 963   |
| 284   | 320   | 989    | 805    | 703   |
| 1723  | 1568  | 6847   | 5979   | 5172  |
| 137   | 321   | 470    | 393    | 329   |

|       |       |       |       |       |
|-------|-------|-------|-------|-------|
| 1218  | 1111  | 2814  | 2427  | 2425  |
| 2694  | 2684  | 4425  | 4131  | 3028  |
| 1994  | 764   | 2246  | 1819  | 1551  |
| 4648  | 5268  | 10277 | 9527  | 8475  |
| 74    | 42    | 81    | 61    | 43    |
| 335   | 233   | 385   | 263   | 181   |
| 101   | 311   | 633   | 581   | 535   |
| 186   | 283   | 862   | 689   | 559   |
| 2041  | 3001  | 10444 | 7378  | 5560  |
| 2946  | 2469  | 6867  | 5298  | 4146  |
| 1004  | 937   | 2140  | 1350  | 1244  |
| 1259  | 1526  | 3440  | 2955  | 2173  |
| 749   | 806   | 2897  | 2404  | 2045  |
| 602   | 750   | 2106  | 1712  | 1281  |
| 2523  | 2949  | 8964  | 7891  | 5986  |
| 64    | 65    | 184   | 148   | 114   |
| 5448  | 5026  | 16396 | 14153 | 12054 |
| 3345  | 4153  | 12688 | 10619 | 8760  |
| 3190  | 3142  | 8862  | 5601  | 5086  |
| 2121  | 2476  | 2935  | 2071  | 1558  |
| 1416  | 1507  | 2733  | 1825  | 1579  |
| 1962  | 1951  | 5409  | 5156  | 4592  |
| 21    | 63    | 102   | 101   | 72    |
| 948   | 676   | 1995  | 1197  | 1095  |
| 2181  | 1913  | 5111  | 3760  | 3122  |
| 365   | 385   | 595   | 562   | 390   |
| 983   | 1318  | 2531  | 2395  | 1850  |
| 1526  | 1597  | 4621  | 3195  | 2824  |
| 285   | 233   | 339   | 323   | 218   |
| 591   | 755   | 1778  | 1012  | 943   |
| 800   | 1090  | 3379  | 2839  | 2340  |
| 24865 | 20188 | 44491 | 38728 | 29965 |
| 4148  | 4756  | 14645 | 13805 | 12691 |
| 1280  | 685   | 2232  | 1781  | 1499  |
| 580   | 526   | 1059  | 785   | 659   |
| 8290  | 8461  | 26840 | 22951 | 19352 |
| 1174  | 1269  | 3082  | 2310  | 1931  |
| 4492  | 3534  | 8269  | 6698  | 6179  |
| 3221  | 3150  | 7659  | 7454  | 5933  |
| 4345  | 5395  | 12315 | 11040 | 9482  |
| 8239  | 10778 | 11967 | 6567  | 6958  |
| 5532  | 2581  | 13023 | 10687 | 7575  |
| 1364  | 1332  | 3085  | 2440  | 1852  |
| 2653  | 3592  | 8023  | 7130  | 5970  |
| 541   | 458   | 841   | 721   | 733   |
| 11410 | 14020 | 45089 | 42943 | 35530 |
| 5205  | 5377  | 17099 | 13124 | 10744 |
| 13090 | 9378  | 34989 | 21393 | 15153 |
| 598   | 691   | 2405  | 2118  | 1896  |
| 616   | 703   | 2137  | 2044  | 1452  |
| 8203  | 5900  | 20178 | 14436 | 12341 |
| 849   | 811   | 1272  | 977   | 823   |

|       |       |       |       |       |
|-------|-------|-------|-------|-------|
| 493   | 479   | 1676  | 998   | 953   |
| 258   | 436   | 424   | 381   | 392   |
| 1361  | 1662  | 4248  | 3996  | 3094  |
| 363   | 337   | 874   | 855   | 719   |
| 4374  | 4970  | 9136  | 6763  | 5555  |
| 839   | 940   | 2465  | 2195  | 2070  |
| 80    | 6     | 194   | 183   | 139   |
| 1539  | 1555  | 2627  | 1835  | 1489  |
| 1406  | 1939  | 3229  | 1992  | 1763  |
| 265   | 353   | 1513  | 896   | 763   |
| 618   | 307   | 698   | 626   | 610   |
| 18747 | 13555 | 35463 | 31159 | 18040 |
| 4     | 32    | 57    | 72    | 53    |
| 1071  | 1142  | 2386  | 1746  | 1437  |
| 7896  | 5878  | 12354 | 8277  | 6366  |
| 22040 | 34339 | 40559 | 25746 | 16876 |
| 4403  | 4857  | 7570  | 5793  | 4686  |
| 628   | 522   | 1580  | 1698  | 1131  |
| 1607  | 1646  | 5036  | 4736  | 3748  |
| 395   | 318   | 572   | 464   | 445   |
| 3503  | 3571  | 6595  | 4331  | 4035  |
| 4154  | 4859  | 12264 | 7760  | 8875  |
| 3265  | 3429  | 8799  | 5441  | 5074  |
| 1264  | 1324  | 4078  | 3745  | 2921  |
| 463   | 137   | 1182  | 908   | 663   |
| 751   | 1145  | 4704  | 3913  | 4512  |
| 3620  | 5816  | 13013 | 10567 | 11037 |
| 592   | 631   | 1890  | 1525  | 1278  |
| 1073  | 1013  | 3485  | 2291  | 1976  |
| 1342  | 2624  | 5404  | 5151  | 2948  |
| 2175  | 2678  | 5439  | 5190  | 4257  |
| 15871 | 19668 | 33686 | 27573 | 23037 |
| 769   | 765   | 2655  | 2290  | 1650  |
| 442   | 398   | 891   | 998   | 873   |
| 1597  | 2170  | 4043  | 2606  | 2480  |
| 61    | 57    | 334   | 244   | 270   |
| 3059  | 3410  | 8248  | 5110  | 4862  |
| 1964  | 2087  | 5549  | 4662  | 4123  |
| 837   | 412   | 1773  | 1081  | 829   |
| 13348 | 9930  | 31896 | 30370 | 20628 |
| 4118  | 3314  | 7810  | 6844  | 5585  |
| 24064 | 23466 | 34377 | 31225 | 26869 |
| 1637  | 2621  | 6573  | 5414  | 4660  |
| 946   | 1009  | 2721  | 2418  | 2101  |
| 306   | 252   | 868   | 596   | 514   |
| 171   | 86    | 270   | 377   | 218   |
| 267   | 250   | 356   | 312   | 164   |
| 651   | 514   | 859   | 667   | 434   |
| 570   | 1339  | 2618  | 1946  | 1575  |
| 1810  | 1350  | 11713 | 6987  | 6655  |
| 19914 | 17262 | 42974 | 38707 | 26708 |
| 263   | 404   | 643   | 415   | 397   |

|       |       |        |       |       |
|-------|-------|--------|-------|-------|
| 364   | 154   | 406    | 340   | 330   |
| 2770  | 1511  | 3647   | 4204  | 2731  |
| 17218 | 15069 | 13092  | 10735 | 8003  |
| 1586  | 964   | 2931   | 2362  | 1799  |
| 1094  | 1602  | 3219   | 2416  | 2193  |
| 449   | 672   | 1084   | 959   | 806   |
| 586   | 859   | 1700   | 1386  | 1205  |
| 894   | 922   | 2538   | 2368  | 2102  |
| 43168 | 51540 | 116622 | 69592 | 67450 |
| 1552  | 1753  | 6134   | 5124  | 4704  |
| 56    | 77    | 302    | 247   | 188   |
| 71    | 85    | 348    | 301   | 221   |
| 3127  | 4040  | 7669   | 4893  | 5078  |
| 529   | 534   | 1046   | 1150  | 934   |
| 437   | 616   | 1221   | 1128  | 805   |
| 966   | 1255  | 2907   | 2580  | 2324  |

VD-5

|        | foldChange  | pval      | padj      |
|--------|-------------|-----------|-----------|
| 22488  | 21.66868627 | 1.32E-185 | 1.85E-181 |
| 9387   | 17.19259865 | 2.46E-131 | 1.73E-127 |
| 6920   | 20.73450677 | 2.32E-125 | 1.09E-121 |
| 50859  | 11.14066321 | 2.43E-123 | 8.52E-120 |
| 313    | 0.058440724 | 1.09E-110 | 3.06E-107 |
| 27606  | 9.532845855 | 1.67E-108 | 3.91E-105 |
| 1578   | 81.89204513 | 2.03E-108 | 4.07E-105 |
| 384    | 0.130740308 | 5.21E-83  | 9.14E-80  |
| 3059   | 0.108760936 | 2.40E-78  | 3.74E-75  |
| 2870   | 0.120479298 | 9.70E-74  | 1.36E-70  |
| 349424 | 5.774640473 | 6.07E-73  | 7.74E-70  |
| 12366  | 0.126498166 | 7.32E-71  | 8.56E-68  |
| 23963  | 4.531760634 | 3.03E-70  | 3.27E-67  |
| 1710   | 12.59178255 | 3.37E-59  | 3.38E-56  |
| 2857   | 8.018247782 | 2.35E-57  | 2.20E-54  |
| 9648   | 0.162310056 | 6.49E-56  | 5.69E-53  |
| 9100   | 5.443367856 | 1.05E-55  | 8.67E-53  |
| 1188   | 0.171511861 | 7.98E-55  | 6.22E-52  |
| 70950  | 0.177242372 | 1.10E-54  | 8.14E-52  |
| 1197   | 0.162172699 | 1.59E-54  | 1.12E-51  |
| 55578  | 4.551138352 | 3.30E-54  | 2.21E-51  |
| 33839  | 4.324124624 | 6.30E-54  | 4.02E-51  |
| 13794  | 4.434330567 | 5.50E-53  | 3.36E-50  |
| 172    | 0.125095595 | 7.51E-53  | 4.39E-50  |
| 60790  | 0.157466892 | 3.39E-52  | 1.90E-49  |
| 8271   | 5.283277088 | 4.44E-52  | 2.40E-49  |
| 22482  | 0.161647473 | 6.82E-52  | 3.55E-49  |
| 26761  | 0.181689883 | 1.72E-51  | 8.63E-49  |
| 37452  | 0.16084331  | 2.14E-51  | 1.03E-48  |
| 985    | 0.169339191 | 1.87E-50  | 8.76E-48  |
| 8489   | 4.720618257 | 4.64E-50  | 2.10E-47  |
| 224    | 0.104822529 | 5.79E-50  | 2.54E-47  |
| 2535   | 0.193219628 | 2.19E-49  | 9.31E-47  |
| 61758  | 0.173348555 | 7.46E-49  | 3.08E-46  |
| 939    | 0.187408376 | 5.36E-48  | 2.15E-45  |
| 1593   | 0.205112512 | 3.48E-46  | 1.36E-43  |
| 1224   | 12.35314859 | 4.71E-46  | 1.79E-43  |
| 96     | 0.109234063 | 5.76E-45  | 2.13E-42  |
| 37043  | 3.807824387 | 7.34E-45  | 2.64E-42  |
| 26452  | 0.197191006 | 9.03E-44  | 3.17E-41  |
| 18593  | 0.216477568 | 1.57E-43  | 5.36E-41  |
| 7771   | 4.508814774 | 3.37E-43  | 1.13E-40  |
| 5648   | 4.259180011 | 7.12E-43  | 2.32E-40  |
| 3527   | 5.918368695 | 2.89E-42  | 9.22E-40  |
| 11554  | 0.219481126 | 3.69E-42  | 1.15E-39  |
| 3241   | 0.248420829 | 5.62E-42  | 1.71E-39  |
| 3600   | 0.256893858 | 6.50E-42  | 1.94E-39  |
| 12     | 0.111995806 | 1.55E-41  | 4.54E-39  |
| 4712   | 0.233281219 | 1.72E-41  | 4.83E-39  |
| 111    | 0.10848191  | 1.69E-41  | 4.83E-39  |
| 11045  | 3.814379345 | 3.91E-41  | 1.08E-38  |

|        |             |          |          |
|--------|-------------|----------|----------|
| 22020  | 0.202962614 | 4.41E-41 | 1.19E-38 |
| 23567  | 3.488308032 | 8.82E-41 | 2.34E-38 |
| 5166   | 0.25682003  | 1.20E-40 | 3.13E-38 |
| 10534  | 3.90348553  | 1.67E-40 | 4.27E-38 |
| 699    | 14.36030821 | 4.40E-40 | 1.10E-37 |
| 1785   | 0.234599013 | 6.98E-40 | 1.72E-37 |
| 11784  | 0.213065955 | 5.06E-39 | 1.22E-36 |
| 36     | 0.122604491 | 1.21E-38 | 2.87E-36 |
| 30162  | 0.236861795 | 1.49E-38 | 3.49E-36 |
| 28403  | 3.413280998 | 2.47E-38 | 5.68E-36 |
| 6211   | 4.08716571  | 2.85E-38 | 6.45E-36 |
| 6467   | 0.255510931 | 5.54E-38 | 1.23E-35 |
| 10848  | 3.411323911 | 5.95E-38 | 1.30E-35 |
| 4262   | 0.237034584 | 6.73E-38 | 1.45E-35 |
| 429    | 0.161254819 | 9.22E-38 | 1.96E-35 |
| 2181   | 0.242990589 | 1.59E-37 | 3.34E-35 |
| 230662 | 3.59455467  | 1.80E-37 | 3.72E-35 |
| 10014  | 3.432333357 | 5.06E-37 | 1.03E-34 |
| 1594   | 0.24313849  | 8.38E-37 | 1.68E-34 |
| 653    | 0.198456687 | 1.09E-36 | 2.15E-34 |
| 2578   | 0.250731001 | 4.00E-36 | 7.80E-34 |
| 135    | 0.11923473  | 6.56E-36 | 1.26E-33 |
| 2908   | 4.666702529 | 1.04E-35 | 1.97E-33 |
| 2577   | 3.655277519 | 1.08E-35 | 2.03E-33 |
| 6123   | 3.9405239   | 1.77E-35 | 3.27E-33 |
| 1617   | 5.731041455 | 5.07E-35 | 9.25E-33 |
| 34     | 0.134751876 | 7.06E-35 | 1.27E-32 |
| 1634   | 0.25506094  | 1.70E-34 | 3.02E-32 |
| 1747   | 0.254944982 | 1.89E-34 | 3.32E-32 |
| 519    | 0.325207833 | 3.06E-34 | 5.31E-32 |
| 17887  | 3.371579995 | 3.39E-34 | 5.81E-32 |
| 1589   | 0.256032592 | 3.95E-34 | 6.67E-32 |
| 1725   | 5.612099356 | 5.45E-34 | 9.11E-32 |
| 1345   | 0.262308151 | 7.42E-34 | 1.23E-31 |
| 1813   | 0.260012712 | 1.70E-33 | 2.78E-31 |
| 5469   | 3.54973464  | 9.32E-33 | 1.50E-30 |
| 6275   | 3.390090548 | 1.95E-32 | 3.09E-30 |
| 8476   | 0.264965999 | 1.96E-32 | 3.09E-30 |
| 1663   | 0.263426399 | 2.47E-32 | 3.85E-30 |
| 228    | 0.215376774 | 1.30E-31 | 2.01E-29 |
| 341    | 0.203830316 | 1.36E-31 | 2.08E-29 |
| 223    | 0.217510685 | 3.06E-31 | 4.62E-29 |
| 175273 | 0.275018762 | 4.48E-31 | 6.68E-29 |
| 8831   | 3.268714086 | 7.66E-31 | 1.13E-28 |
| 8003   | 3.323046696 | 2.97E-30 | 4.34E-28 |
| 328    | 0.194827689 | 5.69E-30 | 8.24E-28 |
| 14849  | 2.997516346 | 7.02E-30 | 1.00E-27 |
| 99769  | 2.710652074 | 7.19E-30 | 1.02E-27 |
| 890    | 0.347867007 | 1.93E-29 | 2.70E-27 |
| 4355   | 0.342825646 | 2.17E-29 | 3.02E-27 |
| 14742  | 2.795683491 | 6.29E-29 | 8.65E-27 |
| 99772  | 0.284841396 | 1.79E-28 | 2.44E-26 |



|        |             |          |          |
|--------|-------------|----------|----------|
| 1046   | 5.734564869 | 3.72E-28 | 5.02E-26 |
| 3006   | 0.371237392 | 4.53E-28 | 6.06E-26 |
| 4738   | 0.333896085 | 5.25E-28 | 6.95E-26 |
| 10087  | 2.813393992 | 1.60E-27 | 2.10E-25 |
| 2615   | 0.338941991 | 1.82E-27 | 2.37E-25 |
| 2318   | 4.143050681 | 2.04E-27 | 2.62E-25 |
| 54194  | 2.712008108 | 3.20E-27 | 4.09E-25 |
| 2971   | 3.032289811 | 3.29E-27 | 4.16E-25 |
| 158662 | 0.342070117 | 7.64E-27 | 9.58E-25 |
| 246    | 0.208063555 | 1.44E-26 | 1.79E-24 |
| 2913   | 0.334505841 | 1.54E-26 | 1.89E-24 |
| 4197   | 0.313143647 | 1.55E-26 | 1.90E-24 |
| 43316  | 2.829609285 | 1.58E-26 | 1.92E-24 |
| 2605   | 3.776622496 | 2.32E-26 | 2.78E-24 |
| 7347   | 0.36204808  | 3.15E-26 | 3.75E-24 |
| 4345   | 3.370554939 | 3.59E-26 | 4.24E-24 |
| 1930   | 3.927484274 | 4.59E-26 | 5.36E-24 |
| 45950  | 2.810899299 | 6.83E-26 | 7.92E-24 |
| 3200   | 3.67896764  | 6.91E-26 | 7.95E-24 |
| 27872  | 2.637161474 | 7.64E-26 | 8.72E-24 |
| 56518  | 0.306133496 | 7.72E-26 | 8.74E-24 |
| 10264  | 0.306170563 | 9.75E-26 | 1.10E-23 |
| 369    | 11.48918235 | 1.19E-25 | 1.32E-23 |
| 13561  | 0.331411421 | 1.41E-25 | 1.56E-23 |
| 4832   | 3.006018897 | 2.86E-25 | 3.14E-23 |
| 4373   | 0.358225499 | 3.01E-25 | 3.28E-23 |
| 2488   | 0.319097611 | 3.10E-25 | 3.35E-23 |
| 1962   | 4.081021988 | 6.62E-25 | 7.10E-23 |
| 6070   | 0.323094323 | 1.30E-24 | 1.38E-22 |
| 3059   | 0.335961663 | 1.63E-24 | 1.72E-22 |
| 335    | 17.21014433 | 2.08E-24 | 2.18E-22 |
| 674    | 0.281429166 | 2.52E-24 | 2.62E-22 |
| 267    | 0.235295957 | 2.70E-24 | 2.78E-22 |
| 14491  | 2.419882797 | 3.21E-24 | 3.29E-22 |
| 23743  | 0.28633412  | 3.63E-24 | 3.69E-22 |
| 40985  | 2.235396172 | 3.77E-24 | 3.80E-22 |
| 634    | 0.260620718 | 5.51E-24 | 5.53E-22 |
| 676    | 6.831071469 | 6.73E-24 | 6.69E-22 |
| 1265   | 0.332610372 | 7.22E-24 | 7.14E-22 |
| 11513  | 0.34842588  | 1.14E-23 | 1.12E-21 |
| 1234   | 0.356214793 | 1.99E-23 | 1.94E-21 |
| 11491  | 2.62356078  | 2.83E-23 | 2.74E-21 |
| 21193  | 0.366401746 | 3.23E-23 | 3.11E-21 |
| 764    | 6.188655311 | 4.58E-23 | 4.38E-21 |
| 15273  | 2.651990867 | 5.67E-23 | 5.38E-21 |
| 549    | 0.27628812  | 6.24E-23 | 5.88E-21 |
| 801890 | 0.404579395 | 1.06E-22 | 9.96E-21 |
| 4468   | 0.364326082 | 1.08E-22 | 1.00E-20 |
| 24016  | 2.329095693 | 1.46E-22 | 1.35E-20 |
| 3111   | 0.381508271 | 2.89E-22 | 2.65E-20 |
| 590    | 0.293900327 | 2.98E-22 | 2.72E-20 |
| 101195 | 0.336351648 | 4.92E-22 | 4.46E-20 |

|       |             |          |          |
|-------|-------------|----------|----------|
| 3575  | 0.361507222 | 4.99E-22 | 4.49E-20 |
| 942   | 0.372587621 | 5.11E-22 | 4.57E-20 |
| 10455 | 0.363518081 | 5.65E-22 | 5.02E-20 |
| 7718  | 0.378112993 | 7.40E-22 | 6.53E-20 |
| 653   | 0.352376346 | 1.27E-21 | 1.12E-19 |
| 853   | 0.301365893 | 1.54E-21 | 1.34E-19 |
| 60741 | 0.361984424 | 1.74E-21 | 1.51E-19 |
| 612   | 0.259130439 | 1.90E-21 | 1.64E-19 |
| 2451  | 0.339713965 | 1.94E-21 | 1.66E-19 |
| 56569 | 2.398332591 | 2.06E-21 | 1.75E-19 |
| 4980  | 0.352417953 | 3.30E-21 | 2.79E-19 |
| 15943 | 2.539547384 | 3.73E-21 | 3.14E-19 |
| 5853  | 2.557727315 | 4.21E-21 | 3.51E-19 |
| 3082  | 0.374234461 | 1.06E-20 | 8.84E-19 |
| 3672  | 0.344458998 | 1.37E-20 | 1.13E-18 |
| 23333 | 2.406443675 | 1.42E-20 | 1.17E-18 |
| 451   | 0.268056291 | 1.55E-20 | 1.27E-18 |
| 1802  | 0.427274464 | 1.70E-20 | 1.38E-18 |
| 16543 | 0.377501585 | 1.73E-20 | 1.39E-18 |
| 13675 | 2.486848698 | 2.01E-20 | 1.61E-18 |
| 32500 | 2.398073091 | 2.27E-20 | 1.81E-18 |
| 249   | 0.274147194 | 3.03E-20 | 2.40E-18 |
| 3057  | 2.858420139 | 3.13E-20 | 2.47E-18 |
| 393   | 0.278452765 | 3.34E-20 | 2.62E-18 |
| 14227 | 1.790938243 | 3.68E-20 | 2.87E-18 |
| 15921 | 0.344933355 | 4.41E-20 | 3.42E-18 |
| 5714  | 2.646294546 | 6.00E-20 | 4.63E-18 |
| 18819 | 0.403308048 | 6.80E-20 | 5.21E-18 |
| 381   | 0.250439422 | 7.31E-20 | 5.57E-18 |
| 896   | 0.376817567 | 8.35E-20 | 6.33E-18 |
| 145   | 0.257597186 | 9.06E-20 | 6.84E-18 |
| 15513 | 0.368566082 | 1.19E-19 | 8.91E-18 |
| 4576  | 2.590692458 | 1.28E-19 | 9.57E-18 |
| 14664 | 2.376359605 | 1.47E-19 | 1.09E-17 |
| 1148  | 0.360649604 | 1.65E-19 | 1.22E-17 |
| 36492 | 2.516283468 | 2.59E-19 | 1.90E-17 |
| 8084  | 3.142632998 | 2.67E-19 | 1.95E-17 |
| 2460  | 0.362084514 | 2.75E-19 | 2.00E-17 |
| 9533  | 2.579057522 | 3.05E-19 | 2.21E-17 |
| 5373  | 2.556497678 | 3.32E-19 | 2.39E-17 |
| 12468 | 0.413391646 | 4.16E-19 | 2.98E-17 |
| 8023  | 2.138836283 | 5.36E-19 | 3.82E-17 |
| 1888  | 0.343176303 | 6.85E-19 | 4.86E-17 |
| 4257  | 2.176976644 | 7.74E-19 | 5.46E-17 |
| 32251 | 0.429280719 | 8.19E-19 | 5.75E-17 |
| 59774 | 0.401259208 | 9.86E-19 | 6.88E-17 |
| 41174 | 0.373756523 | 1.33E-18 | 9.21E-17 |
| 906   | 0.333344204 | 1.54E-18 | 1.07E-16 |
| 52413 | 2.181258206 | 2.17E-18 | 1.49E-16 |
| 9427  | 0.399527647 | 2.25E-18 | 1.54E-16 |
| 16984 | 0.40315563  | 2.57E-18 | 1.75E-16 |
| 5023  | 0.39189235  | 2.73E-18 | 1.84E-16 |

|        |             |          |          |
|--------|-------------|----------|----------|
| 45031  | 0.430212247 | 2.73E-18 | 1.84E-16 |
| 2047   | 0.425374078 | 2.82E-18 | 1.89E-16 |
| 7282   | 0.414806131 | 3.08E-18 | 2.06E-16 |
| 3925   | 0.437710013 | 3.15E-18 | 2.10E-16 |
| 73791  | 0.363500115 | 3.50E-18 | 2.32E-16 |
| 717529 | 0.416649773 | 3.87E-18 | 2.55E-16 |
| 1606   | 0.372720408 | 3.96E-18 | 2.60E-16 |
| 2517   | 0.383851557 | 4.10E-18 | 2.68E-16 |
| 6988   | 2.12458069  | 4.47E-18 | 2.91E-16 |
| 206    | 0.356078054 | 4.62E-18 | 2.99E-16 |
| 1597   | 0.39272034  | 5.07E-18 | 3.27E-16 |
| 860    | 4.785241681 | 5.23E-18 | 3.35E-16 |
| 61     | 0.336331982 | 5.77E-18 | 3.68E-16 |
| 21798  | 0.382850925 | 6.01E-18 | 3.81E-16 |
| 479777 | 0.407643147 | 6.06E-18 | 3.83E-16 |
| 21961  | 2.287031972 | 7.60E-18 | 4.79E-16 |
| 2323   | 0.416883439 | 1.14E-17 | 7.14E-16 |
| 2118   | 3.008992768 | 1.15E-17 | 7.19E-16 |
| 748    | 0.315172867 | 1.19E-17 | 7.39E-16 |
| 1310   | 0.360755689 | 1.71E-17 | 1.06E-15 |
| 2192   | 0.410363665 | 1.76E-17 | 1.08E-15 |
| 4068   | 0.406997    | 1.81E-17 | 1.11E-15 |
| 3929   | 0.39803157  | 1.92E-17 | 1.17E-15 |
| 68     | 0.353276764 | 1.97E-17 | 1.20E-15 |
| 2922   | 0.360685611 | 1.99E-17 | 1.20E-15 |
| 2056   | 0.351542829 | 2.57E-17 | 1.55E-15 |
| 38304  | 0.416981045 | 2.81E-17 | 1.68E-15 |
| 576    | 0.302392963 | 3.51E-17 | 2.10E-15 |
| 336    | 0.286444522 | 3.55E-17 | 2.11E-15 |
| 1254   | 3.519140726 | 4.60E-17 | 2.72E-15 |
| 56645  | 0.422560075 | 4.97E-17 | 2.93E-15 |
| 1738   | 0.440564671 | 5.06E-17 | 2.97E-15 |
| 2333   | 2.778088589 | 5.10E-17 | 2.98E-15 |
| 523    | 0.293860408 | 5.76E-17 | 3.35E-15 |
| 23877  | 2.224229246 | 5.78E-17 | 3.35E-15 |
| 990    | 0.392820861 | 7.82E-17 | 4.51E-15 |
| 3323   | 2.629386735 | 9.08E-17 | 5.22E-15 |
| 12962  | 0.403671813 | 9.25E-17 | 5.30E-15 |
| 39905  | 0.394711867 | 1.00E-16 | 5.73E-15 |
| 27596  | 0.417866973 | 1.06E-16 | 6.00E-15 |
| 15997  | 0.436537856 | 1.18E-16 | 6.69E-15 |
| 6084   | 2.325830869 | 1.23E-16 | 6.94E-15 |
| 301    | 0.417136532 | 1.42E-16 | 7.96E-15 |
| 335653 | 0.456087284 | 1.92E-16 | 1.08E-14 |
| 6230   | 0.441409224 | 2.10E-16 | 1.17E-14 |
| 694    | 0.377690145 | 2.12E-16 | 1.18E-14 |
| 3126   | 0.411974809 | 2.25E-16 | 1.24E-14 |
| 16854  | 2.216986974 | 2.95E-16 | 1.62E-14 |
| 8839   | 0.439369511 | 2.94E-16 | 1.62E-14 |
| 954    | 0.393329922 | 3.32E-16 | 1.81E-14 |
| 834    | 0.379800105 | 5.02E-16 | 2.73E-14 |
| 613401 | 0.434288645 | 5.11E-16 | 2.77E-14 |

|        |             |          |          |
|--------|-------------|----------|----------|
| 1446   | 0.389089629 | 6.00E-16 | 3.24E-14 |
| 10340  | 2.146454153 | 6.23E-16 | 3.35E-14 |
| 4967   | 0.43201728  | 6.26E-16 | 3.35E-14 |
| 4356   | 0.399017814 | 6.33E-16 | 3.38E-14 |
| 1242   | 0.413780515 | 6.41E-16 | 3.41E-14 |
| 2347   | 0.480894761 | 7.94E-16 | 4.20E-14 |
| 6416   | 0.428896589 | 8.04E-16 | 4.24E-14 |
| 6240   | 2.398992192 | 9.19E-16 | 4.83E-14 |
| 10888  | 2.162296015 | 9.58E-16 | 5.02E-14 |
| 911    | 0.384147397 | 1.01E-15 | 5.27E-14 |
| 5448   | 0.434972352 | 1.07E-15 | 5.55E-14 |
| 29283  | 2.240473637 | 1.13E-15 | 5.86E-14 |
| 7082   | 0.433898443 | 1.16E-15 | 6.00E-14 |
| 134123 | 2.162498116 | 1.23E-15 | 6.31E-14 |
| 3259   | 0.477465738 | 1.47E-15 | 7.51E-14 |
| 3450   | 0.469103301 | 1.48E-15 | 7.55E-14 |
| 2229   | 0.430092212 | 1.59E-15 | 8.07E-14 |
| 410    | 0.328873046 | 1.65E-15 | 8.37E-14 |
| 30398  | 2.166283334 | 1.74E-15 | 8.79E-14 |
| 5139   | 0.43827076  | 1.84E-15 | 9.24E-14 |
| 2077   | 0.419566477 | 1.94E-15 | 9.71E-14 |
| 1389   | 0.38767798  | 2.03E-15 | 1.01E-13 |
| 13727  | 0.420661466 | 2.01E-15 | 1.01E-13 |
| 1411   | 0.374839318 | 2.03E-15 | 1.01E-13 |
| 154    | 0.292778239 | 2.06E-15 | 1.02E-13 |
| 480    | 5.226840031 | 2.27E-15 | 1.12E-13 |
| 28173  | 2.223527944 | 2.32E-15 | 1.14E-13 |
| 2306   | 0.457800505 | 2.43E-15 | 1.19E-13 |
| 2918   | 2.520589752 | 2.72E-15 | 1.33E-13 |
| 275139 | 0.445611055 | 3.37E-15 | 1.63E-13 |
| 128870 | 2.033474118 | 3.37E-15 | 1.63E-13 |
| 14788  | 2.1058512   | 3.40E-15 | 1.64E-13 |
| 17112  | 2.073258899 | 3.67E-15 | 1.76E-13 |
| 1369   | 0.39702453  | 3.87E-15 | 1.85E-13 |
| 3186   | 2.239141152 | 3.97E-15 | 1.90E-13 |
| 2109   | 0.43457396  | 4.13E-15 | 1.96E-13 |
| 3405   | 2.442504146 | 4.46E-15 | 2.12E-13 |
| 37634  | 0.457381976 | 5.20E-15 | 2.46E-13 |
| 601    | 4.594032079 | 5.38E-15 | 2.53E-13 |
| 4330   | 0.450729189 | 5.48E-15 | 2.57E-13 |
| 80560  | 0.425440067 | 5.58E-15 | 2.61E-13 |
| 447    | 0.373626327 | 6.82E-15 | 3.18E-13 |
| 4032   | 0.426713886 | 7.24E-15 | 3.37E-13 |
| 10059  | 0.446447435 | 8.47E-15 | 3.92E-13 |
| 23803  | 2.006779047 | 9.64E-15 | 4.45E-13 |
| 20275  | 0.450874557 | 1.08E-14 | 4.97E-13 |
| 9062   | 2.169976009 | 1.19E-14 | 5.47E-13 |
| 2919   | 0.431203331 | 1.23E-14 | 5.61E-13 |
| 692    | 3.420284973 | 1.34E-14 | 6.12E-13 |
| 1503   | 2.792642699 | 1.59E-14 | 7.23E-13 |
| 1528   | 0.398229028 | 1.66E-14 | 7.50E-13 |
| 3459   | 0.443692086 | 1.77E-14 | 7.98E-13 |

|       |             |          |          |
|-------|-------------|----------|----------|
| 55985 | 2.15634088  | 1.84E-14 | 8.27E-13 |
| 483   | 0.426690503 | 2.18E-14 | 9.79E-13 |
| 14785 | 0.435597564 | 2.59E-14 | 1.16E-12 |
| 4630  | 0.465608502 | 2.96E-14 | 1.32E-12 |
| 3330  | 0.420767429 | 2.97E-14 | 1.32E-12 |
| 1757  | 0.404201224 | 3.05E-14 | 1.35E-12 |
| 3125  | 0.467590737 | 3.72E-14 | 1.64E-12 |
| 744   | 3.2218415   | 4.28E-14 | 1.88E-12 |
| 609   | 0.396108658 | 7.23E-14 | 3.17E-12 |
| 2338  | 2.494786001 | 7.56E-14 | 3.31E-12 |
| 574   | 0.352351949 | 9.03E-14 | 3.93E-12 |
| 7111  | 2.11554505  | 9.19E-14 | 3.99E-12 |
| 93968 | 2.037883804 | 9.38E-14 | 4.07E-12 |
| 2757  | 2.414499994 | 9.85E-14 | 4.25E-12 |
| 14258 | 2.22670577  | 1.02E-13 | 4.40E-12 |
| 4667  | 0.46291141  | 1.04E-13 | 4.45E-12 |
| 91553 | 2.011498715 | 1.05E-13 | 4.49E-12 |
| 6359  | 0.497844022 | 1.05E-13 | 4.49E-12 |
| 2891  | 0.481996602 | 1.16E-13 | 4.95E-12 |
| 18631 | 0.462548378 | 1.31E-13 | 5.55E-12 |
| 151   | 0.255663968 | 1.39E-13 | 5.89E-12 |
| 16010 | 1.981543214 | 1.60E-13 | 6.73E-12 |
| 14400 | 0.447488694 | 1.62E-13 | 6.79E-12 |
| 119   | 0.316520025 | 2.15E-13 | 8.99E-12 |
| 4584  | 0.492706708 | 2.18E-13 | 9.10E-12 |
| 2809  | 0.505071644 | 2.54E-13 | 1.06E-11 |
| 6126  | 0.469002209 | 3.05E-13 | 1.27E-11 |
| 14661 | 1.985205007 | 3.23E-13 | 1.34E-11 |
| 8704  | 0.46195825  | 3.25E-13 | 1.34E-11 |
| 11059 | 0.492156302 | 3.24E-13 | 1.34E-11 |
| 6894  | 0.452457371 | 3.42E-13 | 1.39E-11 |
| 1605  | 0.504585289 | 3.41E-13 | 1.39E-11 |
| 7081  | 1.598653609 | 3.41E-13 | 1.39E-11 |
| 8459  | 2.05270893  | 3.44E-13 | 1.40E-11 |
| 8420  | 0.502088482 | 3.56E-13 | 1.44E-11 |
| 3388  | 2.262436163 | 3.64E-13 | 1.47E-11 |
| 1475  | 0.504430708 | 3.67E-13 | 1.48E-11 |
| 79310 | 0.465698688 | 3.74E-13 | 1.50E-11 |
| 464   | 0.345112452 | 4.01E-13 | 1.61E-11 |
| 12520 | 0.459909247 | 4.15E-13 | 1.66E-11 |
| 6057  | 0.505917213 | 4.77E-13 | 1.90E-11 |
| 426   | 0.363444592 | 5.21E-13 | 2.07E-11 |
| 123   | 0.291188636 | 5.26E-13 | 2.08E-11 |
| 87933 | 1.70819698  | 5.54E-13 | 2.19E-11 |
| 12645 | 0.446653356 | 6.01E-13 | 2.37E-11 |
| 8414  | 1.785125198 | 6.14E-13 | 2.41E-11 |
| 1585  | 2.205838851 | 6.51E-13 | 2.55E-11 |
| 15929 | 2.025671058 | 6.64E-13 | 2.60E-11 |
| 4934  | 0.447223469 | 6.91E-13 | 2.69E-11 |
| 49313 | 0.467552616 | 6.99E-13 | 2.72E-11 |
| 9570  | 1.983345985 | 7.54E-13 | 2.91E-11 |
| 6679  | 0.466283953 | 7.54E-13 | 2.91E-11 |

|        |             |          |          |
|--------|-------------|----------|----------|
| 74159  | 1.714638053 | 8.13E-13 | 3.14E-11 |
| 320    | 0.350702306 | 8.23E-13 | 3.16E-11 |
| 749    | 0.393192916 | 8.63E-13 | 3.31E-11 |
| 12177  | 1.988897514 | 9.68E-13 | 3.70E-11 |
| 6441   | 0.494356548 | 1.00E-12 | 3.83E-11 |
| 283    | 4.305930359 | 1.05E-12 | 4.01E-11 |
| 13593  | 0.474943786 | 1.06E-12 | 4.04E-11 |
| 64     | 0.266842751 | 1.13E-12 | 4.28E-11 |
| 93540  | 1.978064681 | 1.36E-12 | 5.14E-11 |
| 2378   | 0.471056816 | 1.36E-12 | 5.14E-11 |
| 3882   | 2.043284514 | 1.37E-12 | 5.16E-11 |
| 16943  | 1.942762649 | 1.41E-12 | 5.27E-11 |
| 2786   | 2.138636016 | 1.42E-12 | 5.29E-11 |
| 9623   | 1.94400854  | 1.72E-12 | 6.41E-11 |
| 180    | 0.35237144  | 1.82E-12 | 6.77E-11 |
| 2910   | 0.485433574 | 1.89E-12 | 7.00E-11 |
| 58414  | 1.902434003 | 2.05E-12 | 7.57E-11 |
| 1451   | 0.447136915 | 2.09E-12 | 7.71E-11 |
| 3547   | 2.198348543 | 2.44E-12 | 8.98E-11 |
| 3265   | 2.210885373 | 2.68E-12 | 9.82E-11 |
| 1909   | 2.268205425 | 2.72E-12 | 9.94E-11 |
| 1557   | 0.517347791 | 2.83E-12 | 1.03E-10 |
| 6      | 0.149542404 | 2.95E-12 | 1.07E-10 |
| 5449   | 0.495105694 | 3.04E-12 | 1.10E-10 |
| 2086   | 0.473247887 | 3.41E-12 | 1.23E-10 |
| 2412   | 0.458841118 | 3.56E-12 | 1.29E-10 |
| 2235   | 0.485966759 | 3.72E-12 | 1.34E-10 |
| 3327   | 0.484304877 | 3.77E-12 | 1.35E-10 |
| 106    | 0.306138978 | 4.91E-12 | 1.76E-10 |
| 948    | 0.401935001 | 5.08E-12 | 1.81E-10 |
| 80854  | 1.943618546 | 5.24E-12 | 1.86E-10 |
| 5469   | 2.060448276 | 5.23E-12 | 1.86E-10 |
| 2869   | 2.150006721 | 5.28E-12 | 1.87E-10 |
| 1157   | 0.412191597 | 5.34E-12 | 1.89E-10 |
| 17903  | 0.467059286 | 5.93E-12 | 2.09E-10 |
| 3007   | 0.466834061 | 6.06E-12 | 2.13E-10 |
| 8028   | 2.001417004 | 6.10E-12 | 2.14E-10 |
| 1284   | 0.431545283 | 6.31E-12 | 2.21E-10 |
| 21466  | 1.905942464 | 6.34E-12 | 2.21E-10 |
| 10594  | 1.832009999 | 6.36E-12 | 2.22E-10 |
| 3152   | 2.062810615 | 6.51E-12 | 2.26E-10 |
| 6866   | 1.979892324 | 6.58E-12 | 2.28E-10 |
| 1242   | 0.494164871 | 6.94E-12 | 2.40E-10 |
| 8412   | 1.896344491 | 7.20E-12 | 2.48E-10 |
| 75936  | 2.008503944 | 7.39E-12 | 2.54E-10 |
| 71087  | 0.479781447 | 7.40E-12 | 2.54E-10 |
| 2044   | 2.219992839 | 7.47E-12 | 2.56E-10 |
| 1260   | 0.508833414 | 7.60E-12 | 2.59E-10 |
| 2188   | 2.203891391 | 7.91E-12 | 2.69E-10 |
| 4188   | 0.492273702 | 7.96E-12 | 2.70E-10 |
| 152643 | 1.940230396 | 7.94E-12 | 2.70E-10 |
| 922    | 0.41915287  | 8.17E-12 | 2.76E-10 |

|        |             |          |          |
|--------|-------------|----------|----------|
| 1745   | 2.440423744 | 8.68E-12 | 2.93E-10 |
| 674    | 0.467651488 | 8.98E-12 | 3.02E-10 |
| 17497  | 1.92771301  | 9.04E-12 | 3.03E-10 |
| 6287   | 1.924607532 | 9.16E-12 | 3.07E-10 |
| 4380   | 1.961075257 | 9.18E-12 | 3.07E-10 |
| 6160   | 1.995273653 | 9.91E-12 | 3.30E-10 |
| 632    | 3.014422659 | 1.04E-11 | 3.45E-10 |
| 622807 | 0.529567295 | 1.05E-11 | 3.47E-10 |
| 986    | 0.464637833 | 1.06E-11 | 3.52E-10 |
| 14758  | 0.516837964 | 1.08E-11 | 3.57E-10 |
| 122391 | 1.828192129 | 1.11E-11 | 3.66E-10 |
| 2257   | 0.537802776 | 1.14E-11 | 3.74E-10 |
| 19615  | 0.440160397 | 1.18E-11 | 3.87E-10 |
| 8156   | 1.983166677 | 1.21E-11 | 3.96E-10 |
| 41605  | 0.488654298 | 1.24E-11 | 4.06E-10 |
| 4688   | 0.493103241 | 1.28E-11 | 4.17E-10 |
| 1336   | 2.489409688 | 1.32E-11 | 4.29E-10 |
| 47000  | 1.88747179  | 1.35E-11 | 4.38E-10 |
| 578    | 0.368945533 | 1.35E-11 | 4.38E-10 |
| 976    | 2.662568448 | 1.43E-11 | 4.62E-10 |
| 2764   | 0.484447989 | 1.44E-11 | 4.65E-10 |
| 6480   | 0.514422315 | 1.45E-11 | 4.66E-10 |
| 5268   | 0.503002997 | 1.46E-11 | 4.66E-10 |
| 277646 | 0.489870364 | 1.70E-11 | 5.42E-10 |
| 32313  | 1.800453017 | 1.90E-11 | 6.06E-10 |
| 912    | 2.710649589 | 1.94E-11 | 6.19E-10 |
| 4154   | 0.491698366 | 2.05E-11 | 6.52E-10 |
| 762    | 2.816238333 | 2.08E-11 | 6.59E-10 |
| 456    | 0.377309279 | 2.21E-11 | 6.97E-10 |
| 5841   | 2.006642121 | 2.22E-11 | 7.01E-10 |
| 2998   | 0.508928548 | 2.23E-11 | 7.03E-10 |
| 3355   | 0.483714597 | 2.33E-11 | 7.32E-10 |
| 6407   | 1.97836996  | 2.43E-11 | 7.62E-10 |
| 60279  | 0.499588381 | 2.56E-11 | 8.00E-10 |
| 2031   | 0.466637745 | 2.58E-11 | 8.02E-10 |
| 5351   | 0.459292313 | 2.57E-11 | 8.02E-10 |
| 2240   | 0.507632661 | 2.64E-11 | 8.20E-10 |
| 458    | 0.359682334 | 2.84E-11 | 8.81E-10 |
| 11416  | 0.480305874 | 2.93E-11 | 9.07E-10 |
| 894    | 0.400369914 | 2.97E-11 | 9.15E-10 |
| 605    | 0.389558836 | 2.98E-11 | 9.15E-10 |
| 21343  | 0.48875765  | 2.98E-11 | 9.15E-10 |
| 3794   | 0.516638085 | 3.08E-11 | 9.43E-10 |
| 2187   | 0.492433669 | 3.10E-11 | 9.48E-10 |
| 478    | 2.62895565  | 3.12E-11 | 9.53E-10 |
| 5966   | 1.928282834 | 3.14E-11 | 9.57E-10 |
| 109094 | 1.997976087 | 3.20E-11 | 9.73E-10 |
| 27685  | 1.904384568 | 3.28E-11 | 9.93E-10 |
| 886    | 0.422688057 | 3.31E-11 | 1.00E-09 |
| 1984   | 2.28367431  | 3.39E-11 | 1.02E-09 |
| 79950  | 1.783401982 | 3.55E-11 | 1.07E-09 |
| 4364   | 2.07088227  | 3.74E-11 | 1.12E-09 |

|        |             |          |          |
|--------|-------------|----------|----------|
| 2388   | 0.52145511  | 3.98E-11 | 1.19E-09 |
| 623    | 2.358649139 | 4.02E-11 | 1.20E-09 |
| 13585  | 1.73054592  | 4.83E-11 | 1.44E-09 |
| 673    | 0.43251242  | 5.11E-11 | 1.52E-09 |
| 5428   | 1.85918484  | 5.12E-11 | 1.52E-09 |
| 1321   | 0.459260992 | 5.17E-11 | 1.54E-09 |
| 2939   | 2.126902312 | 5.57E-11 | 1.65E-09 |
| 366    | 2.76058839  | 5.69E-11 | 1.68E-09 |
| 906228 | 0.530191389 | 5.85E-11 | 1.73E-09 |
| 3593   | 0.508052758 | 6.29E-11 | 1.85E-09 |
| 11372  | 0.491159856 | 6.39E-11 | 1.88E-09 |
| 1353   | 0.465869278 | 6.84E-11 | 2.00E-09 |
| 21590  | 0.526473226 | 7.38E-11 | 2.16E-09 |
| 6770   | 1.997296296 | 7.49E-11 | 2.19E-09 |
| 1995   | 0.510527028 | 7.79E-11 | 2.27E-09 |
| 231    | 5.20751032  | 8.00E-11 | 2.32E-09 |
| 24     | 0.23107955  | 8.31E-11 | 2.41E-09 |
| 11074  | 1.86368476  | 8.48E-11 | 2.45E-09 |
| 1484   | 0.433702896 | 8.79E-11 | 2.53E-09 |
| 746    | 0.4849043   | 8.79E-11 | 2.53E-09 |
| 6215   | 1.926788836 | 9.32E-11 | 2.68E-09 |
| 2406   | 0.486924129 | 9.35E-11 | 2.68E-09 |
| 843    | 0.398201339 | 9.56E-11 | 2.74E-09 |
| 2962   | 1.979234002 | 9.72E-11 | 2.78E-09 |
| 345    | 0.390304406 | 9.82E-11 | 2.80E-09 |
| 881    | 0.454587721 | 1.01E-10 | 2.86E-09 |
| 3769   | 1.98479748  | 1.01E-10 | 2.86E-09 |
| 2700   | 0.514915447 | 1.02E-10 | 2.88E-09 |
| 427    | 3.758506464 | 1.24E-10 | 3.51E-09 |
| 5723   | 0.536203509 | 1.48E-10 | 4.16E-09 |
| 449    | 0.417046979 | 1.48E-10 | 4.16E-09 |
| 105    | 0.295595302 | 1.56E-10 | 4.38E-09 |
| 1341   | 0.495395605 | 1.56E-10 | 4.38E-09 |
| 1101   | 0.470779634 | 1.59E-10 | 4.43E-09 |
| 2555   | 2.118086325 | 1.59E-10 | 4.43E-09 |
| 10898  | 1.857882226 | 1.61E-10 | 4.50E-09 |
| 1807   | 0.442471335 | 1.68E-10 | 4.68E-09 |
| 4462   | 2.021757326 | 1.68E-10 | 4.68E-09 |
| 7008   | 0.52355972  | 1.69E-10 | 4.69E-09 |
| 8878   | 1.833482179 | 1.72E-10 | 4.76E-09 |
| 9643   | 1.876546892 | 1.77E-10 | 4.88E-09 |
| 698    | 2.338957773 | 1.81E-10 | 4.99E-09 |
| 666    | 0.513025748 | 2.04E-10 | 5.62E-09 |
| 2185   | 0.503125192 | 2.10E-10 | 5.77E-09 |
| 172    | 0.394628272 | 2.11E-10 | 5.77E-09 |
| 38127  | 1.845743075 | 2.15E-10 | 5.89E-09 |
| 565    | 2.782144979 | 2.17E-10 | 5.92E-09 |
| 9813   | 1.850522361 | 2.38E-10 | 6.49E-09 |
| 48676  | 1.869241045 | 2.56E-10 | 6.95E-09 |
| 21253  | 1.850913337 | 2.58E-10 | 6.99E-09 |
| 471    | 0.405686119 | 2.63E-10 | 7.12E-09 |
| 31509  | 1.841782162 | 2.66E-10 | 7.18E-09 |



|        |             |          |          |
|--------|-------------|----------|----------|
| 9229   | 1.844712684 | 2.69E-10 | 7.26E-09 |
| 663    | 0.443086729 | 2.71E-10 | 7.31E-09 |
| 17081  | 1.972601292 | 2.80E-10 | 7.52E-09 |
| 1754   | 2.305778151 | 3.10E-10 | 8.32E-09 |
| 2749   | 0.473210002 | 3.11E-10 | 8.33E-09 |
| 3064   | 1.928136757 | 3.14E-10 | 8.40E-09 |
| 1101   | 0.455260695 | 3.17E-10 | 8.46E-09 |
| 77383  | 1.811586537 | 3.23E-10 | 8.59E-09 |
| 8430   | 0.552894979 | 3.25E-10 | 8.63E-09 |
| 7972   | 1.830742288 | 3.29E-10 | 8.73E-09 |
| 1926   | 0.531230282 | 3.41E-10 | 9.03E-09 |
| 4582   | 1.920621608 | 3.58E-10 | 9.46E-09 |
| 1605   | 0.548749517 | 3.59E-10 | 9.47E-09 |
| 497    | 0.46851888  | 3.87E-10 | 1.02E-08 |
| 4858   | 0.517073005 | 4.20E-10 | 1.10E-08 |
| 2754   | 0.510822277 | 4.19E-10 | 1.10E-08 |
| 11181  | 0.557515663 | 4.21E-10 | 1.10E-08 |
| 1432   | 2.206556607 | 4.22E-10 | 1.10E-08 |
| 601    | 0.43763631  | 4.46E-10 | 1.16E-08 |
| 8029   | 1.828851335 | 4.46E-10 | 1.16E-08 |
| 745    | 2.5740337   | 4.76E-10 | 1.24E-08 |
| 201    | 0.336863605 | 4.87E-10 | 1.26E-08 |
| 5874   | 0.573364988 | 4.94E-10 | 1.28E-08 |
| 2239   | 0.489899468 | 5.09E-10 | 1.31E-08 |
| 36786  | 1.767727614 | 5.09E-10 | 1.31E-08 |
| 2409   | 0.549974185 | 5.51E-10 | 1.42E-08 |
| 15733  | 0.525406231 | 5.54E-10 | 1.42E-08 |
| 22340  | 1.76731334  | 5.84E-10 | 1.50E-08 |
| 514    | 0.401682882 | 5.86E-10 | 1.50E-08 |
| 16232  | 1.81112086  | 6.05E-10 | 1.55E-08 |
| 204    | 0.393156438 | 6.39E-10 | 1.63E-08 |
| 676    | 0.423701897 | 6.42E-10 | 1.64E-08 |
| 794    | 0.440412578 | 6.47E-10 | 1.65E-08 |
| 1060   | 0.469447733 | 6.85E-10 | 1.74E-08 |
| 3396   | 0.536515391 | 6.86E-10 | 1.74E-08 |
| 6184   | 1.763208873 | 7.14E-10 | 1.80E-08 |
| 1754   | 0.48163851  | 7.21E-10 | 1.82E-08 |
| 205    | 0.391254528 | 7.42E-10 | 1.87E-08 |
| 29618  | 0.499651999 | 7.44E-10 | 1.87E-08 |
| 937    | 0.439937837 | 7.80E-10 | 1.96E-08 |
| 1114   | 0.586437728 | 7.91E-10 | 1.98E-08 |
| 2481   | 2.002437586 | 8.18E-10 | 2.05E-08 |
| 7271   | 0.504396383 | 8.46E-10 | 2.11E-08 |
| 80651  | 1.791786282 | 9.37E-10 | 2.34E-08 |
| 6258   | 0.542184669 | 9.51E-10 | 2.37E-08 |
| 2575   | 2.00255036  | 9.77E-10 | 2.43E-08 |
| 124761 | 1.728386884 | 9.81E-10 | 2.43E-08 |
| 139    | 0.347844369 | 1.03E-09 | 2.54E-08 |
| 1      | 0.08644386  | 1.10E-09 | 2.72E-08 |
| 1191   | 0.475563635 | 1.13E-09 | 2.79E-08 |
| 1148   | 2.377542931 | 1.14E-09 | 2.80E-08 |
| 1878   | 2.137387399 | 1.14E-09 | 2.80E-08 |

|        |             |          |          |
|--------|-------------|----------|----------|
| 5145   | 1.927264865 | 1.15E-09 | 2.83E-08 |
| 1145   | 0.530517419 | 1.15E-09 | 2.83E-08 |
| 483    | 0.385584559 | 1.16E-09 | 2.84E-08 |
| 70808  | 0.538108474 | 1.22E-09 | 2.98E-08 |
| 110338 | 0.553281068 | 1.29E-09 | 3.14E-08 |
| 21423  | 1.740391444 | 1.31E-09 | 3.19E-08 |
| 3262   | 1.983140254 | 1.34E-09 | 3.25E-08 |
| 283    | 0.413186962 | 1.45E-09 | 3.51E-08 |
| 60677  | 0.551854287 | 1.47E-09 | 3.56E-08 |
| 2165   | 0.495543375 | 1.50E-09 | 3.62E-08 |
| 2642   | 0.528900977 | 1.53E-09 | 3.69E-08 |
| 25355  | 1.749685757 | 1.53E-09 | 3.69E-08 |
| 18035  | 0.553862341 | 1.65E-09 | 3.97E-08 |
| 1759   | 1.95234248  | 1.75E-09 | 4.21E-08 |
| 5801   | 1.812331703 | 1.77E-09 | 4.25E-08 |
| 93     | 0.273501575 | 1.79E-09 | 4.28E-08 |
| 10127  | 1.784056784 | 1.81E-09 | 4.32E-08 |
| 481    | 0.486652934 | 1.81E-09 | 4.32E-08 |
| 8155   | 1.748941709 | 1.89E-09 | 4.49E-08 |
| 2723   | 1.906475281 | 1.89E-09 | 4.49E-08 |
| 8512   | 1.775914605 | 1.90E-09 | 4.50E-08 |
| 86     | 0.318187067 | 1.97E-09 | 4.67E-08 |
| 30902  | 1.745668711 | 2.03E-09 | 4.80E-08 |
| 408993 | 0.571729819 | 2.10E-09 | 4.96E-08 |
| 94     | 0.283627044 | 2.14E-09 | 5.03E-08 |
| 16121  | 0.591928157 | 2.15E-09 | 5.04E-08 |
| 9202   | 1.695666499 | 2.34E-09 | 5.50E-08 |
| 2932   | 1.847788608 | 2.35E-09 | 5.51E-08 |
| 202    | 0.400269393 | 2.37E-09 | 5.54E-08 |
| 31507  | 1.758208063 | 2.49E-09 | 5.81E-08 |
| 44662  | 1.752708786 | 2.60E-09 | 6.06E-08 |
| 5001   | 1.762372312 | 2.69E-09 | 6.26E-08 |
| 1189   | 2.253610779 | 2.74E-09 | 6.36E-08 |
| 1045   | 0.464525307 | 2.76E-09 | 6.40E-08 |
| 10138  | 1.720419912 | 2.95E-09 | 6.83E-08 |
| 16605  | 0.516469548 | 2.98E-09 | 6.89E-08 |
| 41757  | 1.610478215 | 3.00E-09 | 6.93E-08 |
| 1378   | 0.504563646 | 3.19E-09 | 7.36E-08 |
| 1052   | 2.159625688 | 3.22E-09 | 7.41E-08 |
| 20767  | 0.516235573 | 3.26E-09 | 7.50E-08 |
| 1629   | 0.555474376 | 3.37E-09 | 7.72E-08 |
| 170    | 0.369332975 | 3.42E-09 | 7.83E-08 |
| 3208   | 1.915949496 | 3.71E-09 | 8.47E-08 |
| 6683   | 1.798872989 | 4.50E-09 | 1.03E-07 |
| 5124   | 1.820912315 | 4.52E-09 | 1.03E-07 |
| 6673   | 1.711244913 | 4.60E-09 | 1.05E-07 |
| 1113   | 2.179771056 | 4.65E-09 | 1.06E-07 |
| 1559   | 0.517304048 | 4.66E-09 | 1.06E-07 |
| 4922   | 1.817190591 | 4.74E-09 | 1.07E-07 |
| 12388  | 0.552837075 | 4.82E-09 | 1.09E-07 |
| 539    | 0.500827654 | 4.85E-09 | 1.10E-07 |
| 104    | 0.27739261  | 4.96E-09 | 1.12E-07 |

|        |             |          |          |
|--------|-------------|----------|----------|
| 12614  | 1.747304358 | 5.14E-09 | 1.16E-07 |
| 4828   | 1.800803542 | 5.46E-09 | 1.23E-07 |
| 2425   | 0.560510657 | 5.60E-09 | 1.26E-07 |
| 26000  | 1.893754697 | 5.63E-09 | 1.26E-07 |
| 10689  | 1.715084648 | 5.89E-09 | 1.32E-07 |
| 2129   | 0.545124351 | 6.37E-09 | 1.42E-07 |
| 1010   | 0.449727337 | 6.38E-09 | 1.42E-07 |
| 831    | 2.521276701 | 6.46E-09 | 1.44E-07 |
| 452    | 0.467593318 | 6.63E-09 | 1.47E-07 |
| 815    | 0.493770782 | 6.67E-09 | 1.48E-07 |
| 10762  | 1.738683539 | 6.87E-09 | 1.52E-07 |
| 74205  | 1.764407761 | 6.99E-09 | 1.54E-07 |
| 15530  | 1.680310977 | 7.33E-09 | 1.62E-07 |
| 5158   | 0.540952061 | 7.36E-09 | 1.62E-07 |
| 7622   | 1.693033996 | 7.55E-09 | 1.66E-07 |
| 18177  | 1.77974811  | 7.70E-09 | 1.69E-07 |
| 18117  | 0.509648395 | 7.70E-09 | 1.69E-07 |
| 11251  | 1.681874513 | 7.73E-09 | 1.69E-07 |
| 3892   | 1.809207748 | 7.80E-09 | 1.70E-07 |
| 10390  | 0.569334119 | 7.95E-09 | 1.74E-07 |
| 49239  | 1.777089984 | 7.98E-09 | 1.74E-07 |
| 11378  | 1.676719168 | 8.28E-09 | 1.80E-07 |
| 18411  | 1.725957975 | 9.12E-09 | 1.98E-07 |
| 5982   | 1.755922327 | 9.38E-09 | 2.03E-07 |
| 1147   | 2.145798338 | 9.43E-09 | 2.04E-07 |
| 6306   | 1.800354516 | 9.45E-09 | 2.04E-07 |
| 25516  | 1.715861499 | 9.49E-09 | 2.05E-07 |
| 4025   | 0.586683961 | 9.52E-09 | 2.05E-07 |
| 2449   | 0.601379995 | 9.53E-09 | 2.05E-07 |
| 287    | 0.374092317 | 9.84E-09 | 2.11E-07 |
| 2196   | 0.562033565 | 1.01E-08 | 2.17E-07 |
| 2149   | 2.015258657 | 1.04E-08 | 2.22E-07 |
| 457    | 0.382564701 | 1.18E-08 | 2.52E-07 |
| 4254   | 0.515352186 | 1.21E-08 | 2.58E-07 |
| 2742   | 1.785459028 | 1.23E-08 | 2.62E-07 |
| 75466  | 0.550589346 | 1.25E-08 | 2.67E-07 |
| 620    | 2.336489833 | 1.41E-08 | 2.99E-07 |
| 128442 | 1.692627294 | 1.41E-08 | 3.00E-07 |
| 1318   | 0.56283037  | 1.41E-08 | 3.00E-07 |
| 1380   | 0.48484711  | 1.42E-08 | 3.00E-07 |
| 6368   | 0.559055708 | 1.44E-08 | 3.04E-07 |
| 1988   | 0.556719172 | 1.45E-08 | 3.05E-07 |
| 965    | 0.476694461 | 1.46E-08 | 3.07E-07 |
| 4178   | 0.545000209 | 1.47E-08 | 3.09E-07 |
| 268002 | 0.599335141 | 1.48E-08 | 3.10E-07 |
| 33285  | 1.684890592 | 1.52E-08 | 3.19E-07 |
| 13190  | 1.73197669  | 1.57E-08 | 3.29E-07 |
| 2372   | 0.524175872 | 1.67E-08 | 3.50E-07 |
| 3403   | 0.508651354 | 1.68E-08 | 3.51E-07 |
| 14321  | 0.547457527 | 1.68E-08 | 3.51E-07 |
| 4895   | 0.553020981 | 1.68E-08 | 3.51E-07 |
| 2522   | 0.526393038 | 1.72E-08 | 3.57E-07 |

|       |             |          |          |
|-------|-------------|----------|----------|
| 289   | 0.419339709 | 1.73E-08 | 3.59E-07 |
| 13883 | 0.54037816  | 1.76E-08 | 3.66E-07 |
| 5361  | 0.570159758 | 1.78E-08 | 3.67E-07 |
| 22681 | 1.783843885 | 1.82E-08 | 3.75E-07 |
| 7872  | 1.807537515 | 1.83E-08 | 3.78E-07 |
| 3107  | 1.855990462 | 1.87E-08 | 3.85E-07 |
| 1631  | 0.491025385 | 1.90E-08 | 3.92E-07 |
| 45571 | 1.698013125 | 1.93E-08 | 3.96E-07 |
| 72468 | 0.565890523 | 1.93E-08 | 3.96E-07 |
| 3276  | 1.88572706  | 2.00E-08 | 4.10E-07 |
| 62154 | 1.742397382 | 2.03E-08 | 4.15E-07 |
| 1084  | 2.296348566 | 2.03E-08 | 4.15E-07 |
| 21087 | 0.560852531 | 2.05E-08 | 4.18E-07 |
| 4648  | 0.571785658 | 2.06E-08 | 4.19E-07 |
| 396   | 0.489205326 | 2.06E-08 | 4.20E-07 |
| 351   | 0.519753467 | 2.11E-08 | 4.28E-07 |
| 343   | 3.039813421 | 2.11E-08 | 4.28E-07 |
| 4258  | 0.579361073 | 2.13E-08 | 4.32E-07 |
| 4714  | 0.581889295 | 2.21E-08 | 4.47E-07 |
| 1106  | 0.494126386 | 2.26E-08 | 4.57E-07 |
| 8676  | 1.751048391 | 2.32E-08 | 4.68E-07 |
| 8611  | 1.634298084 | 2.43E-08 | 4.89E-07 |
| 5228  | 0.545378311 | 2.46E-08 | 4.94E-07 |
| 1001  | 0.493097558 | 2.52E-08 | 5.06E-07 |
| 7261  | 1.685763663 | 2.52E-08 | 5.06E-07 |
| 2427  | 0.596738146 | 2.67E-08 | 5.35E-07 |
| 2724  | 0.588151026 | 2.71E-08 | 5.42E-07 |
| 545   | 0.476186327 | 2.85E-08 | 5.69E-07 |
| 2557  | 1.836536309 | 2.88E-08 | 5.74E-07 |
| 69    | 0.304326233 | 2.88E-08 | 5.74E-07 |
| 2752  | 0.513190971 | 2.92E-08 | 5.81E-07 |
| 18933 | 0.574407211 | 3.17E-08 | 6.30E-07 |
| 72224 | 0.590764188 | 3.30E-08 | 6.54E-07 |
| 2850  | 1.782885854 | 3.53E-08 | 6.99E-07 |
| 6511  | 0.58550454  | 3.60E-08 | 7.11E-07 |
| 1644  | 0.544038399 | 3.64E-08 | 7.18E-07 |
| 14596 | 0.57894329  | 3.88E-08 | 7.64E-07 |
| 2588  | 0.607059016 | 4.01E-08 | 7.89E-07 |
| 728   | 0.479781846 | 4.04E-08 | 7.95E-07 |
| 3333  | 0.584917575 | 4.05E-08 | 7.95E-07 |
| 5350  | 0.569651448 | 4.22E-08 | 8.28E-07 |
| 1558  | 1.989164455 | 4.26E-08 | 8.33E-07 |
| 23710 | 1.727426908 | 4.27E-08 | 8.35E-07 |
| 1713  | 0.562166698 | 4.35E-08 | 8.50E-07 |
| 18835 | 1.6812115   | 4.38E-08 | 8.53E-07 |
| 2349  | 1.813885192 | 4.53E-08 | 8.82E-07 |
| 12172 | 1.593150233 | 4.56E-08 | 8.87E-07 |
| 4372  | 0.632581157 | 4.63E-08 | 8.99E-07 |
| 45330 | 1.691879525 | 4.69E-08 | 9.10E-07 |
| 3211  | 1.894669455 | 4.89E-08 | 9.46E-07 |
| 7678  | 0.582883339 | 4.90E-08 | 9.47E-07 |
| 2482  | 1.889287984 | 4.92E-08 | 9.49E-07 |

|        |             |          |          |
|--------|-------------|----------|----------|
| 1432   | 0.507476838 | 5.13E-08 | 9.89E-07 |
| 3878   | 1.702239083 | 5.26E-08 | 1.01E-06 |
| 140486 | 0.603909651 | 5.35E-08 | 1.03E-06 |
| 3848   | 0.606929709 | 5.39E-08 | 1.04E-06 |
| 3003   | 0.530413797 | 5.52E-08 | 1.06E-06 |
| 1806   | 0.551672728 | 5.68E-08 | 1.09E-06 |
| 2069   | 0.607016418 | 5.74E-08 | 1.10E-06 |
| 2233   | 0.575871599 | 5.97E-08 | 1.14E-06 |
| 2569   | 1.876153157 | 6.01E-08 | 1.15E-06 |
| 2660   | 1.793099378 | 6.08E-08 | 1.16E-06 |
| 10503  | 1.688135834 | 6.21E-08 | 1.18E-06 |
| 17031  | 1.62760244  | 6.24E-08 | 1.18E-06 |
| 13529  | 0.549947109 | 6.26E-08 | 1.19E-06 |
| 14290  | 1.656133948 | 6.27E-08 | 1.19E-06 |
| 688    | 0.511604488 | 6.27E-08 | 1.19E-06 |
| 6765   | 0.569241468 | 6.38E-08 | 1.21E-06 |
| 5972   | 0.622065522 | 6.52E-08 | 1.23E-06 |
| 5406   | 0.581522204 | 6.56E-08 | 1.23E-06 |
| 959    | 0.567865871 | 6.61E-08 | 1.24E-06 |
| 40488  | 1.642658598 | 6.74E-08 | 1.27E-06 |
| 16388  | 0.542651113 | 7.09E-08 | 1.33E-06 |
| 5789   | 0.571218192 | 7.13E-08 | 1.34E-06 |
| 25733  | 1.52729324  | 7.16E-08 | 1.34E-06 |
| 32484  | 0.577731705 | 7.32E-08 | 1.37E-06 |
| 94496  | 1.65943376  | 7.51E-08 | 1.40E-06 |
| 3337   | 1.649732363 | 7.91E-08 | 1.47E-06 |
| 12099  | 0.583051539 | 7.95E-08 | 1.48E-06 |
| 58444  | 1.668804288 | 8.33E-08 | 1.55E-06 |
| 14988  | 1.655761429 | 8.39E-08 | 1.56E-06 |
| 1642   | 0.498224221 | 8.44E-08 | 1.56E-06 |
| 17688  | 1.700187826 | 8.51E-08 | 1.58E-06 |
| 1342   | 2.000851719 | 8.82E-08 | 1.63E-06 |
| 5750   | 1.738082523 | 9.09E-08 | 1.68E-06 |
| 3514   | 1.705937972 | 9.16E-08 | 1.69E-06 |
| 6375   | 1.632562772 | 9.18E-08 | 1.69E-06 |
| 7623   | 1.712802133 | 9.39E-08 | 1.73E-06 |
| 24052  | 0.590002043 | 9.72E-08 | 1.78E-06 |
| 5460   | 0.596416714 | 9.75E-08 | 1.79E-06 |
| 4641   | 1.741042012 | 9.86E-08 | 1.81E-06 |
| 860    | 0.480984983 | 9.93E-08 | 1.82E-06 |
| 296    | 0.493199822 | 1.04E-07 | 1.90E-06 |
| 2157   | 0.542533563 | 1.06E-07 | 1.94E-06 |
| 27140  | 1.672882935 | 1.08E-07 | 1.96E-06 |
| 2838   | 1.814398305 | 1.08E-07 | 1.96E-06 |
| 42554  | 1.671972036 | 1.08E-07 | 1.97E-06 |
| 28785  | 0.548429251 | 1.09E-07 | 1.98E-06 |
| 128363 | 1.648530048 | 1.10E-07 | 1.99E-06 |
| 5817   | 1.724944321 | 1.10E-07 | 1.99E-06 |
| 852    | 2.240942133 | 1.15E-07 | 2.08E-06 |
| 920    | 0.479821525 | 1.15E-07 | 2.08E-06 |
| 5268   | 1.693843147 | 1.18E-07 | 2.13E-06 |
| 23792  | 0.595787442 | 1.22E-07 | 2.20E-06 |

|        |             |          |          |
|--------|-------------|----------|----------|
| 360    | 0.40952605  | 1.23E-07 | 2.21E-06 |
| 4835   | 1.685603353 | 1.26E-07 | 2.26E-06 |
| 4390   | 1.609782287 | 1.27E-07 | 2.27E-06 |
| 5912   | 1.692992162 | 1.27E-07 | 2.28E-06 |
| 6300   | 1.640555646 | 1.32E-07 | 2.36E-06 |
| 95     | 0.313748877 | 1.33E-07 | 2.39E-06 |
| 243147 | 0.598584465 | 1.34E-07 | 2.39E-06 |
| 4294   | 0.551749575 | 1.34E-07 | 2.39E-06 |
| 36     | 0.297117876 | 1.36E-07 | 2.42E-06 |
| 6962   | 1.650777602 | 1.36E-07 | 2.42E-06 |
| 142    | 0.351419071 | 1.37E-07 | 2.43E-06 |
| 62463  | 0.589064345 | 1.37E-07 | 2.43E-06 |
| 1037   | 0.533082601 | 1.40E-07 | 2.49E-06 |
| 1188   | 2.236730059 | 1.41E-07 | 2.50E-06 |
| 120745 | 0.589093977 | 1.43E-07 | 2.52E-06 |
| 2850   | 0.598490968 | 1.43E-07 | 2.52E-06 |
| 2607   | 1.64278045  | 1.44E-07 | 2.53E-06 |
| 15872  | 1.584710437 | 1.45E-07 | 2.55E-06 |
| 678    | 0.544800346 | 1.47E-07 | 2.59E-06 |
| 11860  | 1.651461233 | 1.47E-07 | 2.59E-06 |
| 37783  | 0.535728639 | 1.48E-07 | 2.59E-06 |
| 2631   | 0.596430566 | 1.49E-07 | 2.61E-06 |
| 7357   | 0.567301666 | 1.49E-07 | 2.61E-06 |
| 103    | 0.356636937 | 1.49E-07 | 2.61E-06 |
| 1508   | 0.536772676 | 1.55E-07 | 2.71E-06 |
| 2727   | 1.763474432 | 1.58E-07 | 2.76E-06 |
| 23006  | 1.768522206 | 1.61E-07 | 2.80E-06 |
| 5066   | 0.586204691 | 1.62E-07 | 2.82E-06 |
| 11736  | 1.593187025 | 1.63E-07 | 2.84E-06 |
| 4742   | 1.698859117 | 1.70E-07 | 2.94E-06 |
| 3787   | 0.588231367 | 1.73E-07 | 3.00E-06 |
| 5738   | 0.57619399  | 1.76E-07 | 3.05E-06 |
| 9271   | 0.600835355 | 1.77E-07 | 3.06E-06 |
| 6996   | 1.671958623 | 1.78E-07 | 3.07E-06 |
| 14204  | 1.691836048 | 1.80E-07 | 3.10E-06 |
| 5674   | 0.589456498 | 1.85E-07 | 3.18E-06 |
| 3040   | 0.592739065 | 1.88E-07 | 3.23E-06 |
| 96378  | 1.701548931 | 1.94E-07 | 3.34E-06 |
| 3      | 0.161045755 | 1.96E-07 | 3.36E-06 |
| 864    | 0.47632667  | 1.97E-07 | 3.38E-06 |
| 4588   | 0.578465267 | 1.99E-07 | 3.41E-06 |
| 2043   | 1.744108901 | 2.03E-07 | 3.47E-06 |
| 63500  | 0.618041975 | 2.04E-07 | 3.49E-06 |
| 1961   | 1.861514443 | 2.13E-07 | 3.64E-06 |
| 2196   | 1.83372681  | 2.16E-07 | 3.67E-06 |
| 30101  | 1.650353761 | 2.17E-07 | 3.69E-06 |
| 1611   | 0.558426704 | 2.21E-07 | 3.75E-06 |
| 1835   | 0.569342016 | 2.21E-07 | 3.75E-06 |
| 3182   | 1.838870965 | 2.25E-07 | 3.82E-06 |
| 23643  | 1.684287609 | 2.30E-07 | 3.89E-06 |
| 14690  | 1.566576293 | 2.30E-07 | 3.89E-06 |
| 143    | 0.421015181 | 2.31E-07 | 3.90E-06 |

|       |             |          |          |
|-------|-------------|----------|----------|
| 8285  | 1.699577676 | 2.39E-07 | 4.03E-06 |
| 740   | 0.555776951 | 2.45E-07 | 4.14E-06 |
| 5838  | 1.610853676 | 2.50E-07 | 4.20E-06 |
| 3144  | 0.58363284  | 2.59E-07 | 4.36E-06 |
| 12754 | 0.617630168 | 2.67E-07 | 4.49E-06 |
| 105   | 7.044141873 | 2.68E-07 | 4.49E-06 |
| 11321 | 1.598241225 | 2.70E-07 | 4.53E-06 |
| 3085  | 0.549140392 | 2.80E-07 | 4.68E-06 |
| 6710  | 1.629414583 | 2.84E-07 | 4.74E-06 |
| 6247  | 0.585893868 | 2.85E-07 | 4.76E-06 |
| 1250  | 1.98966732  | 2.91E-07 | 4.85E-06 |
| 954   | 0.554789609 | 2.99E-07 | 4.98E-06 |
| 1629  | 0.537011138 | 3.09E-07 | 5.14E-06 |
| 1134  | 1.893602048 | 3.11E-07 | 5.17E-06 |
| 3548  | 0.579333161 | 3.12E-07 | 5.18E-06 |
| 11153 | 0.608989436 | 3.18E-07 | 5.27E-06 |
| 1471  | 1.854404594 | 3.23E-07 | 5.34E-06 |
| 2518  | 0.625221035 | 3.24E-07 | 5.35E-06 |
| 6292  | 0.641028912 | 3.28E-07 | 5.41E-06 |
| 2836  | 0.620531993 | 3.32E-07 | 5.48E-06 |
| 4917  | 1.657546481 | 3.38E-07 | 5.57E-06 |
| 4739  | 0.630322273 | 3.39E-07 | 5.58E-06 |
| 7359  | 1.64113403  | 3.53E-07 | 5.79E-06 |
| 568   | 0.572030904 | 3.61E-07 | 5.92E-06 |
| 5001  | 1.633346565 | 3.67E-07 | 6.02E-06 |
| 8845  | 1.670757011 | 3.71E-07 | 6.07E-06 |
| 14076 | 0.579125913 | 3.76E-07 | 6.15E-06 |
| 14095 | 1.655620609 | 3.78E-07 | 6.17E-06 |
| 4279  | 1.646801304 | 3.80E-07 | 6.21E-06 |
| 5399  | 1.643583284 | 3.82E-07 | 6.23E-06 |
| 23229 | 1.669211897 | 3.90E-07 | 6.36E-06 |
| 132   | 0.334521343 | 3.92E-07 | 6.38E-06 |
| 20213 | 1.64548501  | 3.97E-07 | 6.44E-06 |
| 511   | 0.425575599 | 4.03E-07 | 6.54E-06 |
| 11311 | 0.595530552 | 4.04E-07 | 6.54E-06 |
| 4412  | 1.645330739 | 4.05E-07 | 6.56E-06 |
| 16378 | 0.602261532 | 4.05E-07 | 6.56E-06 |
| 572   | 0.488885773 | 4.06E-07 | 6.56E-06 |
| 389   | 0.480486338 | 4.13E-07 | 6.67E-06 |
| 2925  | 1.802511022 | 4.14E-07 | 6.68E-06 |
| 290   | 0.473741626 | 4.16E-07 | 6.69E-06 |
| 3481  | 1.709255003 | 4.22E-07 | 6.79E-06 |
| 17689 | 0.607653124 | 4.28E-07 | 6.88E-06 |
| 1123  | 0.572435143 | 4.29E-07 | 6.88E-06 |
| 2290  | 0.564237942 | 4.30E-07 | 6.90E-06 |
| 4937  | 0.619972472 | 4.33E-07 | 6.93E-06 |
| 517   | 0.509683298 | 4.37E-07 | 6.98E-06 |
| 676   | 0.554668803 | 4.47E-07 | 7.14E-06 |
| 3295  | 0.61104383  | 4.52E-07 | 7.18E-06 |
| 1072  | 1.963776116 | 4.51E-07 | 7.18E-06 |
| 7087  | 1.647865936 | 4.51E-07 | 7.18E-06 |
| 1423  | 1.785427693 | 4.50E-07 | 7.18E-06 |

|        |             |          |          |
|--------|-------------|----------|----------|
| 20552  | 1.576435358 | 4.61E-07 | 7.32E-06 |
| 16859  | 0.632509392 | 4.74E-07 | 7.52E-06 |
| 2457   | 1.813906989 | 4.83E-07 | 7.65E-06 |
| 815    | 0.561632901 | 4.90E-07 | 7.76E-06 |
| 388    | 2.445054245 | 4.96E-07 | 7.83E-06 |
| 3597   | 1.706263938 | 4.96E-07 | 7.83E-06 |
| 2148   | 0.580434044 | 4.97E-07 | 7.84E-06 |
| 395    | 0.444735668 | 5.10E-07 | 8.03E-06 |
| 11185  | 1.591836117 | 5.11E-07 | 8.03E-06 |
| 11272  | 1.573661405 | 5.26E-07 | 8.27E-06 |
| 1527   | 1.775124311 | 5.37E-07 | 8.43E-06 |
| 27046  | 0.585273198 | 5.55E-07 | 8.70E-06 |
| 1318   | 0.5135493   | 5.56E-07 | 8.71E-06 |
| 1190   | 0.594770434 | 5.68E-07 | 8.88E-06 |
| 55290  | 1.537911128 | 5.68E-07 | 8.88E-06 |
| 11290  | 0.593988441 | 5.77E-07 | 9.00E-06 |
| 28800  | 0.634762356 | 5.83E-07 | 9.10E-06 |
| 3024   | 1.665309494 | 5.89E-07 | 9.17E-06 |
| 215105 | 0.646352512 | 6.01E-07 | 9.34E-06 |
| 10403  | 0.623319883 | 6.01E-07 | 9.34E-06 |
| 39769  | 0.548868703 | 6.02E-07 | 9.35E-06 |
| 660    | 0.477704131 | 6.08E-07 | 9.44E-06 |
| 852    | 0.430941511 | 6.16E-07 | 9.55E-06 |
| 7342   | 1.58494279  | 6.23E-07 | 9.64E-06 |
| 1206   | 1.822887684 | 6.26E-07 | 9.67E-06 |
| 494    | 0.507544104 | 6.33E-07 | 9.78E-06 |
| 4068   | 1.73975814  | 6.39E-07 | 9.86E-06 |
| 8710   | 1.586461495 | 6.44E-07 | 9.91E-06 |
| 12302  | 0.630622447 | 6.47E-07 | 9.96E-06 |
| 9908   | 1.427046062 | 6.50E-07 | 9.99E-06 |
| 16674  | 1.678550105 | 6.62E-07 | 1.02E-05 |
| 2609   | 1.729083723 | 6.68E-07 | 1.02E-05 |
| 16763  | 1.729913606 | 6.67E-07 | 1.02E-05 |
| 39876  | 1.592853892 | 6.92E-07 | 1.06E-05 |
| 1697   | 0.633150649 | 7.35E-07 | 1.12E-05 |
| 14099  | 1.692527089 | 7.50E-07 | 1.15E-05 |
| 24415  | 1.600296045 | 7.60E-07 | 1.16E-05 |
| 2181   | 0.627877163 | 7.68E-07 | 1.17E-05 |
| 72187  | 1.603299327 | 7.81E-07 | 1.19E-05 |
| 4275   | 0.571521728 | 7.89E-07 | 1.20E-05 |
| 538    | 0.552944315 | 8.03E-07 | 1.22E-05 |
| 8560   | 0.607753529 | 8.08E-07 | 1.23E-05 |
| 2175   | 1.84571517  | 8.09E-07 | 1.23E-05 |
| 1853   | 0.58965307  | 8.19E-07 | 1.24E-05 |
| 209990 | 0.648669715 | 8.37E-07 | 1.27E-05 |
| 4591   | 0.620815582 | 8.41E-07 | 1.27E-05 |
| 26910  | 0.58407136  | 8.43E-07 | 1.27E-05 |
| 1607   | 1.873201967 | 8.63E-07 | 1.30E-05 |
| 4997   | 1.73778331  | 8.81E-07 | 1.33E-05 |
| 660    | 0.565764404 | 8.84E-07 | 1.33E-05 |
| 3273   | 1.697401855 | 9.32E-07 | 1.40E-05 |
| 51     | 0.305057628 | 9.36E-07 | 1.40E-05 |



|        |             |          |          |
|--------|-------------|----------|----------|
| 10537  | 1.603907486 | 9.46E-07 | 1.42E-05 |
| 3564   | 0.593672488 | 9.51E-07 | 1.42E-05 |
| 699    | 2.023895858 | 9.54E-07 | 1.43E-05 |
| 4051   | 1.53274431  | 9.63E-07 | 1.44E-05 |
| 867    | 1.979111341 | 9.72E-07 | 1.45E-05 |
| 955    | 2.165607335 | 9.79E-07 | 1.46E-05 |
| 4070   | 0.603565695 | 9.82E-07 | 1.46E-05 |
| 6716   | 1.609316379 | 1.01E-06 | 1.50E-05 |
| 3363   | 0.629022957 | 1.03E-06 | 1.53E-05 |
| 671    | 0.570915913 | 1.04E-06 | 1.54E-05 |
| 8859   | 0.607110803 | 1.05E-06 | 1.55E-05 |
| 1011   | 0.60736788  | 1.06E-06 | 1.58E-05 |
| 29     | 21.45669263 | 1.07E-06 | 1.58E-05 |
| 3868   | 0.600416733 | 1.07E-06 | 1.58E-05 |
| 23377  | 1.525612299 | 1.07E-06 | 1.58E-05 |
| 15223  | 0.61265832  | 1.07E-06 | 1.58E-05 |
| 2055   | 1.735793474 | 1.09E-06 | 1.60E-05 |
| 4282   | 0.59955286  | 1.09E-06 | 1.60E-05 |
| 1737   | 0.594511178 | 1.11E-06 | 1.63E-05 |
| 5466   | 1.577801107 | 1.12E-06 | 1.64E-05 |
| 2407   | 1.672865082 | 1.12E-06 | 1.65E-05 |
| 405    | 0.508993112 | 1.14E-06 | 1.67E-05 |
| 7646   | 0.609709448 | 1.15E-06 | 1.69E-05 |
| 138    | 0.365974673 | 1.15E-06 | 1.69E-05 |
| 2646   | 1.71606217  | 1.18E-06 | 1.73E-05 |
| 38041  | 1.565519366 | 1.19E-06 | 1.74E-05 |
| 5922   | 1.651240158 | 1.21E-06 | 1.76E-05 |
| 10095  | 1.560892261 | 1.21E-06 | 1.76E-05 |
| 1023   | 2.105715544 | 1.23E-06 | 1.80E-05 |
| 44     | 9.768566779 | 1.24E-06 | 1.80E-05 |
| 28913  | 0.619259872 | 1.25E-06 | 1.82E-05 |
| 30854  | 0.638939082 | 1.28E-06 | 1.86E-05 |
| 111154 | 0.663943701 | 1.31E-06 | 1.90E-05 |
| 1852   | 0.572628051 | 1.31E-06 | 1.90E-05 |
| 219377 | 0.643509142 | 1.33E-06 | 1.92E-05 |
| 9763   | 0.612439619 | 1.34E-06 | 1.93E-05 |
| 2797   | 1.633758935 | 1.34E-06 | 1.93E-05 |
| 1734   | 0.613973029 | 1.35E-06 | 1.94E-05 |
| 1453   | 1.808579667 | 1.35E-06 | 1.94E-05 |
| 6027   | 1.554754858 | 1.35E-06 | 1.95E-05 |
| 731    | 2.2322798   | 1.38E-06 | 1.99E-05 |
| 354    | 0.519906653 | 1.40E-06 | 2.02E-05 |
| 616    | 0.48095272  | 1.42E-06 | 2.04E-05 |
| 17040  | 0.616039234 | 1.44E-06 | 2.07E-05 |
| 50789  | 1.580678984 | 1.46E-06 | 2.09E-05 |
| 6269   | 0.654041662 | 1.52E-06 | 2.18E-05 |
| 3953   | 1.708300991 | 1.54E-06 | 2.20E-05 |
| 571    | 0.562184649 | 1.55E-06 | 2.21E-05 |
| 6821   | 1.628490688 | 1.55E-06 | 2.21E-05 |
| 26621  | 1.62992051  | 1.58E-06 | 2.25E-05 |
| 1956   | 1.683043525 | 1.61E-06 | 2.29E-05 |
| 4197   | 0.616653077 | 1.67E-06 | 2.38E-05 |

|         |             |          |          |
|---------|-------------|----------|----------|
| 1375    | 0.614577965 | 1.69E-06 | 2.40E-05 |
| 13594   | 1.570556874 | 1.70E-06 | 2.40E-05 |
| 44113   | 0.611487331 | 1.70E-06 | 2.40E-05 |
| 7460    | 0.643681275 | 1.72E-06 | 2.43E-05 |
| 2921    | 1.737607828 | 1.76E-06 | 2.49E-05 |
| 114     | 0.469153614 | 1.80E-06 | 2.54E-05 |
| 4450    | 0.653197209 | 1.80E-06 | 2.55E-05 |
| 5325    | 0.634603107 | 1.80E-06 | 2.55E-05 |
| 52      | 4.240403362 | 1.82E-06 | 2.56E-05 |
| 993     | 0.579113143 | 1.84E-06 | 2.59E-05 |
| 885     | 0.607930924 | 1.86E-06 | 2.61E-05 |
| 11201   | 0.631140967 | 1.86E-06 | 2.61E-05 |
| 188     | 0.503388158 | 1.92E-06 | 2.69E-05 |
| 98528   | 1.489194753 | 1.94E-06 | 2.72E-05 |
| 6158    | 1.585259474 | 1.95E-06 | 2.74E-05 |
| 9470    | 1.562204051 | 1.96E-06 | 2.75E-05 |
| 1461    | 0.642902786 | 1.97E-06 | 2.75E-05 |
| 352     | 0.564437708 | 1.99E-06 | 2.77E-05 |
| 6787    | 0.590343802 | 1.99E-06 | 2.77E-05 |
| 26175   | 1.493856005 | 2.03E-06 | 2.82E-05 |
| 12987   | 1.528605161 | 2.05E-06 | 2.85E-05 |
| 22345   | 1.623174985 | 2.07E-06 | 2.87E-05 |
| 717     | 1.969027627 | 2.07E-06 | 2.87E-05 |
| 119     | 4.172873069 | 2.08E-06 | 2.88E-05 |
| 581     | 2.099218595 | 2.08E-06 | 2.89E-05 |
| 796     | 0.599485006 | 2.17E-06 | 3.01E-05 |
| 2839    | 0.638509396 | 2.19E-06 | 3.03E-05 |
| 282     | 0.426079273 | 2.19E-06 | 3.03E-05 |
| 7818    | 1.545571282 | 2.20E-06 | 3.04E-05 |
| 1486    | 0.571504432 | 2.20E-06 | 3.04E-05 |
| 15893   | 0.624611871 | 2.20E-06 | 3.04E-05 |
| 1844    | 1.805902667 | 2.22E-06 | 3.05E-05 |
| 1570750 | 0.667993532 | 2.23E-06 | 3.07E-05 |
| 753     | 0.592943194 | 2.28E-06 | 3.13E-05 |
| 4721    | 0.634550196 | 2.29E-06 | 3.14E-05 |
| 680204  | 0.658642794 | 2.29E-06 | 3.15E-05 |
| 2416    | 1.664667911 | 2.32E-06 | 3.17E-05 |
| 447     | 2.562189591 | 2.32E-06 | 3.17E-05 |
| 17854   | 0.632508133 | 2.33E-06 | 3.19E-05 |
| 1854    | 1.609193202 | 2.38E-06 | 3.25E-05 |
| 30      | 0.245242985 | 2.41E-06 | 3.28E-05 |
| 46997   | 1.569671995 | 2.50E-06 | 3.41E-05 |
| 122     | 4.614393098 | 2.51E-06 | 3.42E-05 |
| 1       | 0.243865193 | 2.61E-06 | 3.56E-05 |
| 35051   | 0.583824345 | 2.65E-06 | 3.60E-05 |
| 15942   | 0.62283343  | 2.67E-06 | 3.63E-05 |
| 1494    | 0.57536154  | 2.73E-06 | 3.70E-05 |
| 5213    | 0.652819503 | 2.75E-06 | 3.73E-05 |
| 1333    | 0.566649415 | 2.75E-06 | 3.73E-05 |
| 1100    | 1.877823348 | 2.79E-06 | 3.78E-05 |
| 10000   | 0.635390442 | 2.81E-06 | 3.80E-05 |
| 33008   | 0.588063698 | 2.83E-06 | 3.82E-05 |

|       |             |          |          |
|-------|-------------|----------|----------|
| 2840  | 1.629002324 | 2.84E-06 | 3.83E-05 |
| 3723  | 1.564800421 | 2.89E-06 | 3.89E-05 |
| 12363 | 0.604979731 | 2.95E-06 | 3.97E-05 |
| 2198  | 1.764044509 | 2.96E-06 | 3.98E-05 |
| 162   | 0.401493833 | 2.99E-06 | 4.01E-05 |
| 11610 | 0.629572804 | 3.02E-06 | 4.05E-05 |
| 1503  | 1.801188883 | 3.06E-06 | 4.11E-05 |
| 1620  | 1.71832046  | 3.08E-06 | 4.13E-05 |
| 6980  | 0.642832702 | 3.12E-06 | 4.17E-05 |
| 8103  | 1.518103941 | 3.13E-06 | 4.19E-05 |
| 4207  | 0.633843538 | 3.20E-06 | 4.27E-05 |
| 6508  | 1.583345362 | 3.23E-06 | 4.32E-05 |
| 19585 | 1.542049398 | 3.24E-06 | 4.33E-05 |
| 9798  | 0.650031197 | 3.26E-06 | 4.35E-05 |
| 2166  | 0.631681158 | 3.44E-06 | 4.58E-05 |
| 1276  | 1.892890163 | 3.45E-06 | 4.59E-05 |
| 1453  | 0.574463674 | 3.49E-06 | 4.64E-05 |
| 333   | 2.834416467 | 3.50E-06 | 4.64E-05 |
| 204   | 0.37998239  | 3.50E-06 | 4.64E-05 |
| 34862 | 1.498059756 | 3.52E-06 | 4.67E-05 |
| 892   | 0.581573726 | 3.62E-06 | 4.79E-05 |
| 25674 | 1.518894013 | 3.64E-06 | 4.81E-05 |
| 1247  | 1.804717359 | 3.69E-06 | 4.87E-05 |
| 2310  | 1.617743806 | 3.71E-06 | 4.90E-05 |
| 1957  | 0.58534909  | 3.78E-06 | 4.98E-05 |
| 3095  | 1.694814451 | 3.79E-06 | 5.00E-05 |
| 60734 | 1.556966982 | 3.81E-06 | 5.02E-05 |
| 13741 | 0.627641113 | 3.87E-06 | 5.10E-05 |
| 881   | 0.597341299 | 3.88E-06 | 5.10E-05 |
| 1931  | 0.640145817 | 3.94E-06 | 5.17E-05 |
| 15687 | 0.63979864  | 3.95E-06 | 5.19E-05 |
| 898   | 1.815898214 | 3.97E-06 | 5.21E-05 |
| 6543  | 1.578491883 | 3.98E-06 | 5.22E-05 |
| 4445  | 1.639017896 | 3.99E-06 | 5.22E-05 |
| 455   | 0.498624465 | 4.03E-06 | 5.26E-05 |
| 5418  | 1.698316791 | 4.05E-06 | 5.28E-05 |
| 392   | 2.339961255 | 4.06E-06 | 5.30E-05 |
| 565   | 0.578925906 | 4.12E-06 | 5.37E-05 |
| 3392  | 1.621322933 | 4.16E-06 | 5.42E-05 |
| 4910  | 0.662842269 | 4.23E-06 | 5.51E-05 |
| 621   | 0.557059084 | 4.24E-06 | 5.51E-05 |
| 2313  | 0.652021203 | 4.24E-06 | 5.51E-05 |
| 10622 | 0.644751745 | 4.27E-06 | 5.53E-05 |
| 213   | 3.338598053 | 4.27E-06 | 5.53E-05 |
| 1271  | 1.806950932 | 4.32E-06 | 5.60E-05 |
| 26741 | 0.61304172  | 4.47E-06 | 5.78E-05 |
| 3057  | 0.623811603 | 4.49E-06 | 5.81E-05 |
| 3850  | 0.579257898 | 4.57E-06 | 5.90E-05 |
| 9999  | 1.500932879 | 4.58E-06 | 5.91E-05 |
| 15500 | 1.507377133 | 4.58E-06 | 5.91E-05 |
| 16598 | 1.532919267 | 4.64E-06 | 5.97E-05 |
| 6293  | 1.542720309 | 4.64E-06 | 5.97E-05 |

|         |             |          |          |
|---------|-------------|----------|----------|
| 42144   | 1.540660385 | 4.66E-06 | 5.99E-05 |
| 20449   | 0.637703804 | 4.78E-06 | 6.14E-05 |
| 1659    | 0.570387382 | 4.84E-06 | 6.21E-05 |
| 12043   | 0.614531192 | 4.89E-06 | 6.27E-05 |
| 3509    | 0.580903932 | 4.90E-06 | 6.27E-05 |
| 1249350 | 0.674476131 | 4.90E-06 | 6.27E-05 |
| 7880    | 0.653770367 | 4.92E-06 | 6.29E-05 |
| 5183    | 1.546426103 | 4.93E-06 | 6.30E-05 |
| 9174    | 1.498123682 | 5.01E-06 | 6.40E-05 |
| 581     | 0.567183664 | 5.35E-06 | 6.82E-05 |
| 633     | 1.926884917 | 5.38E-06 | 6.84E-05 |
| 12005   | 1.537007393 | 5.37E-06 | 6.84E-05 |
| 555     | 1.755159056 | 5.48E-06 | 6.96E-05 |
| 2773    | 0.602400362 | 5.62E-06 | 7.14E-05 |
| 6915    | 1.509597584 | 5.67E-06 | 7.20E-05 |
| 763     | 2.12760889  | 5.72E-06 | 7.25E-05 |
| 8761    | 0.626098393 | 5.74E-06 | 7.26E-05 |
| 7089    | 0.647562459 | 5.74E-06 | 7.26E-05 |
| 3631    | 0.607880982 | 5.80E-06 | 7.33E-05 |
| 1471195 | 0.684064386 | 5.81E-06 | 7.34E-05 |
| 225     | 0.457532032 | 5.96E-06 | 7.53E-05 |
| 4893    | 0.671137086 | 5.97E-06 | 7.53E-05 |
| 1219    | 0.526845442 | 5.99E-06 | 7.55E-05 |
| 938     | 1.997872924 | 6.03E-06 | 7.60E-05 |
| 1290    | 1.88609149  | 6.06E-06 | 7.62E-05 |
| 19467   | 1.615605353 | 6.06E-06 | 7.62E-05 |
| 20742   | 0.670801667 | 6.07E-06 | 7.62E-05 |
| 8212    | 0.653026029 | 6.18E-06 | 7.73E-05 |
| 643     | 0.570545242 | 6.17E-06 | 7.73E-05 |
| 611     | 2.006586008 | 6.18E-06 | 7.73E-05 |
| 5571    | 1.539388682 | 6.28E-06 | 7.85E-05 |
| 18820   | 1.537665591 | 6.38E-06 | 7.98E-05 |
| 1125    | 0.587220587 | 6.39E-06 | 7.98E-05 |
| 1197    | 0.543955315 | 6.46E-06 | 8.06E-05 |
| 578     | 2.176744599 | 6.57E-06 | 8.18E-05 |
| 11369   | 1.527638211 | 6.57E-06 | 8.18E-05 |
| 10316   | 0.651962297 | 6.74E-06 | 8.39E-05 |
| 2296    | 0.606981481 | 6.78E-06 | 8.43E-05 |
| 27166   | 0.63027383  | 6.90E-06 | 8.57E-05 |
| 6687    | 0.613833669 | 7.04E-06 | 8.73E-05 |
| 1461    | 0.600396628 | 7.12E-06 | 8.83E-05 |
| 6250    | 0.651540904 | 7.15E-06 | 8.85E-05 |
| 10226   | 1.506538124 | 7.15E-06 | 8.85E-05 |
| 1704    | 1.751170949 | 7.45E-06 | 9.21E-05 |
| 2365    | 0.609870226 | 7.47E-06 | 9.23E-05 |
| 403966  | 1.435111555 | 7.52E-06 | 9.29E-05 |
| 1566    | 1.740944184 | 7.59E-06 | 9.36E-05 |
| 8658    | 0.650332013 | 7.64E-06 | 9.42E-05 |
| 2923    | 0.638999783 | 7.66E-06 | 9.43E-05 |
| 160     | 0.49317283  | 7.73E-06 | 9.51E-05 |
| 25078   | 1.493225947 | 7.76E-06 | 9.54E-05 |
| 162609  | 0.641886111 | 7.89E-06 | 9.69E-05 |

|        |             |          |          |
|--------|-------------|----------|----------|
| 3015   | 1.658506406 | 7.93E-06 | 9.73E-05 |
| 3571   | 1.58348132  | 8.04E-06 | 9.85E-05 |
| 3217   | 0.636084763 | 8.16E-06 | 9.99E-05 |
| 3324   | 0.609791383 | 8.18E-06 | 0.0001   |
| 704    | 0.556573388 | 8.20E-06 | 0.0001   |
| 4000   | 0.670938466 | 8.20E-06 | 0.0001   |
| 83     | 4.257423484 | 8.22E-06 | 0.0001   |
| 31629  | 0.64345518  | 8.26E-06 | 0.000101 |
| 3222   | 0.622907858 | 8.34E-06 | 0.000102 |
| 6003   | 0.607225703 | 8.37E-06 | 0.000102 |
| 1678   | 0.597205219 | 8.40E-06 | 0.000102 |
| 1152   | 1.866658426 | 8.44E-06 | 0.000103 |
| 2140   | 1.62659228  | 8.57E-06 | 0.000104 |
| 122507 | 0.656989863 | 8.59E-06 | 0.000104 |
| 92377  | 1.527469537 | 8.59E-06 | 0.000104 |
| 2305   | 1.714100504 | 8.70E-06 | 0.000105 |
| 2423   | 1.690799379 | 8.86E-06 | 0.000107 |
| 5673   | 1.558485895 | 9.05E-06 | 0.000109 |
| 3593   | 1.596310827 | 9.25E-06 | 0.000112 |
| 1246   | 0.62489911  | 9.25E-06 | 0.000112 |
| 9233   | 1.578825305 | 9.46E-06 | 0.000114 |
| 1524   | 1.701563493 | 9.49E-06 | 0.000114 |
| 7462   | 0.676594426 | 9.55E-06 | 0.000115 |
| 734    | 0.576588217 | 9.55E-06 | 0.000115 |
| 2542   | 1.613765635 | 9.57E-06 | 0.000115 |
| 7441   | 1.522098168 | 9.58E-06 | 0.000115 |
| 1998   | 1.686747615 | 9.69E-06 | 0.000116 |
| 2465   | 1.531664105 | 9.81E-06 | 0.000118 |
| 489    | 0.575599613 | 9.89E-06 | 0.000118 |
| 16772  | 1.500479116 | 9.90E-06 | 0.000118 |
| 2231   | 0.533013278 | 9.95E-06 | 0.000119 |
| 1442   | 1.736840458 | 1.02E-05 | 0.000121 |
| 167    | 0.479631545 | 1.02E-05 | 0.000122 |
| 6309   | 1.558438318 | 1.02E-05 | 0.000122 |
| 929    | 1.865355905 | 1.03E-05 | 0.000123 |
| 7565   | 0.668212516 | 1.05E-05 | 0.000125 |
| 9015   | 0.628242783 | 1.06E-05 | 0.000126 |
| 13960  | 1.519662149 | 1.07E-05 | 0.000127 |
| 132    | 0.468778151 | 1.08E-05 | 0.000128 |
| 4018   | 0.663853392 | 1.08E-05 | 0.000129 |
| 5960   | 1.589986479 | 1.10E-05 | 0.000131 |
| 3301   | 0.61605826  | 1.11E-05 | 0.000131 |
| 9906   | 1.520704901 | 1.11E-05 | 0.000131 |
| 5604   | 1.56083907  | 1.11E-05 | 0.000131 |
| 4139   | 1.614091928 | 1.11E-05 | 0.000131 |
| 906    | 0.598153697 | 1.11E-05 | 0.000131 |
| 437    | 2.088533378 | 1.11E-05 | 0.000131 |
| 2735   | 1.483443628 | 1.11E-05 | 0.000131 |
| 44408  | 0.64463591  | 1.12E-05 | 0.000132 |
| 25293  | 0.640365161 | 1.13E-05 | 0.000133 |
| 15390  | 1.569647456 | 1.14E-05 | 0.000133 |
| 101    | 0.429853363 | 1.14E-05 | 0.000134 |

|        |             |          |          |
|--------|-------------|----------|----------|
| 347    | 0.482865443 | 1.16E-05 | 0.000136 |
| 13446  | 0.650041405 | 1.17E-05 | 0.000138 |
| 2178   | 0.641092448 | 1.19E-05 | 0.000139 |
| 1680   | 1.632178682 | 1.22E-05 | 0.000143 |
| 29077  | 1.555893891 | 1.23E-05 | 0.000144 |
| 11061  | 1.483333416 | 1.24E-05 | 0.000145 |
| 2220   | 0.639454427 | 1.27E-05 | 0.000149 |
| 928    | 1.887222367 | 1.27E-05 | 0.000149 |
| 5108   | 0.653137667 | 1.29E-05 | 0.00015  |
| 1802   | 0.586896211 | 1.29E-05 | 0.00015  |
| 1059   | 1.724452946 | 1.29E-05 | 0.000151 |
| 4725   | 0.698108506 | 1.32E-05 | 0.000153 |
| 10073  | 1.510037817 | 1.32E-05 | 0.000154 |
| 21576  | 1.465534803 | 1.33E-05 | 0.000154 |
| 6245   | 1.556211365 | 1.33E-05 | 0.000154 |
| 3230   | 0.65365901  | 1.34E-05 | 0.000155 |
| 2971   | 0.647460317 | 1.34E-05 | 0.000155 |
| 3091   | 1.66582777  | 1.35E-05 | 0.000156 |
| 5416   | 1.524961289 | 1.35E-05 | 0.000156 |
| 5215   | 0.651460909 | 1.37E-05 | 0.000158 |
| 451    | 1.920677165 | 1.39E-05 | 0.00016  |
| 8253   | 1.556753797 | 1.40E-05 | 0.000162 |
| 3994   | 1.522099083 | 1.42E-05 | 0.000164 |
| 8454   | 1.547965497 | 1.42E-05 | 0.000164 |
| 2527   | 1.717245735 | 1.44E-05 | 0.000165 |
| 1082   | 0.598120301 | 1.47E-05 | 0.000169 |
| 1481   | 1.760061711 | 1.47E-05 | 0.000169 |
| 361    | 0.507045095 | 1.49E-05 | 0.00017  |
| 59117  | 1.476183388 | 1.49E-05 | 0.000171 |
| 107    | 0.345620572 | 1.51E-05 | 0.000172 |
| 247    | 1.861378781 | 1.50E-05 | 0.000172 |
| 18914  | 1.513854712 | 1.51E-05 | 0.000173 |
| 5598   | 1.559326523 | 1.51E-05 | 0.000173 |
| 3432   | 1.578115072 | 1.52E-05 | 0.000173 |
| 55855  | 0.683749569 | 1.52E-05 | 0.000173 |
| 6885   | 1.563438994 | 1.52E-05 | 0.000173 |
| 1022   | 1.765627484 | 1.53E-05 | 0.000174 |
| 10040  | 0.671108435 | 1.53E-05 | 0.000174 |
| 10461  | 0.679419531 | 1.55E-05 | 0.000177 |
| 10706  | 1.458825879 | 1.57E-05 | 0.000178 |
| 3338   | 1.553489854 | 1.57E-05 | 0.000178 |
| 33824  | 1.508651395 | 1.58E-05 | 0.000179 |
| 18331  | 1.506627388 | 1.58E-05 | 0.000179 |
| 1682   | 0.634444445 | 1.58E-05 | 0.000179 |
| 2599   | 1.633346151 | 1.60E-05 | 0.000182 |
| 12533  | 1.470739752 | 1.63E-05 | 0.000184 |
| 3857   | 0.666335932 | 1.65E-05 | 0.000187 |
| 2471   | 0.662036069 | 1.66E-05 | 0.000188 |
| 323163 | 0.687324458 | 1.68E-05 | 0.000189 |
| 21641  | 0.679605044 | 1.69E-05 | 0.000191 |
| 11389  | 1.490182083 | 1.70E-05 | 0.000191 |
| 9983   | 0.630931649 | 1.73E-05 | 0.000195 |

|       |             |          |          |
|-------|-------------|----------|----------|
| 65926 | 1.51214497  | 1.75E-05 | 0.000197 |
| 5575  | 1.535648003 | 1.76E-05 | 0.000198 |
| 415   | 0.520515508 | 1.77E-05 | 0.000198 |
| 3949  | 1.532321851 | 1.78E-05 | 0.0002   |
| 270   | 2.678737597 | 1.78E-05 | 0.0002   |
| 4529  | 0.687552107 | 1.78E-05 | 0.0002   |
| 1850  | 0.620803974 | 1.79E-05 | 0.0002   |
| 5903  | 0.637209659 | 1.80E-05 | 0.000201 |
| 596   | 2.035637759 | 1.82E-05 | 0.000204 |
| 39    | 0.231929398 | 1.83E-05 | 0.000204 |
| 44812 | 0.690677729 | 1.84E-05 | 0.000205 |
| 8768  | 0.68513924  | 1.85E-05 | 0.000206 |
| 2325  | 1.567555394 | 1.85E-05 | 0.000206 |
| 526   | 0.591427028 | 1.86E-05 | 0.000206 |
| 18295 | 1.542821959 | 1.87E-05 | 0.000208 |
| 35365 | 1.510629464 | 1.87E-05 | 0.000208 |
| 9280  | 1.503141208 | 1.89E-05 | 0.000209 |
| 11693 | 0.625599341 | 1.89E-05 | 0.00021  |
| 3518  | 0.631049384 | 1.90E-05 | 0.00021  |
| 21423 | 0.682335657 | 1.91E-05 | 0.000211 |
| 1151  | 0.642895884 | 1.92E-05 | 0.000213 |
| 7796  | 0.683698923 | 1.93E-05 | 0.000214 |
| 8154  | 1.493559471 | 1.94E-05 | 0.000214 |
| 18587 | 1.490297548 | 1.96E-05 | 0.000217 |
| 5927  | 1.524548741 | 1.98E-05 | 0.000219 |
| 3163  | 1.527709134 | 2.00E-05 | 0.00022  |
| 297   | 0.492324937 | 2.00E-05 | 0.00022  |
| 8836  | 0.706623252 | 2.00E-05 | 0.00022  |
| 38534 | 0.651671282 | 2.03E-05 | 0.000223 |
| 278   | 0.455681507 | 2.06E-05 | 0.000226 |
| 1071  | 1.676794385 | 2.06E-05 | 0.000226 |
| 1358  | 0.644828056 | 2.07E-05 | 0.000227 |
| 449   | 0.568253145 | 2.07E-05 | 0.000227 |
| 10746 | 1.468211562 | 2.11E-05 | 0.000231 |
| 1045  | 1.758182265 | 2.11E-05 | 0.000231 |
| 1190  | 1.672953619 | 2.12E-05 | 0.000232 |
| 28709 | 0.674510529 | 2.13E-05 | 0.000232 |
| 57048 | 1.516663124 | 2.13E-05 | 0.000232 |
| 11467 | 0.632093066 | 2.15E-05 | 0.000235 |
| 6778  | 0.66631082  | 2.17E-05 | 0.000236 |
| 1663  | 1.632790977 | 2.20E-05 | 0.00024  |
| 6300  | 1.545287816 | 2.20E-05 | 0.00024  |
| 6074  | 1.29999886  | 2.21E-05 | 0.00024  |
| 1801  | 1.610470911 | 2.25E-05 | 0.000245 |
| 21976 | 0.647446598 | 2.29E-05 | 0.000248 |
| 2431  | 0.609320111 | 2.31E-05 | 0.000251 |
| 3579  | 1.572113286 | 2.34E-05 | 0.000254 |
| 4452  | 1.531677189 | 2.35E-05 | 0.000254 |
| 573   | 1.8847902   | 2.35E-05 | 0.000255 |
| 6557  | 0.674075573 | 2.36E-05 | 0.000256 |
| 1519  | 0.629025591 | 2.39E-05 | 0.000259 |
| 4643  | 0.684606928 | 2.39E-05 | 0.000259 |

|        |             |          |          |
|--------|-------------|----------|----------|
| 92514  | 0.645865993 | 2.41E-05 | 0.00026  |
| 2229   | 0.668911679 | 2.43E-05 | 0.000262 |
| 1810   | 0.64493793  | 2.44E-05 | 0.000263 |
| 4683   | 0.635739223 | 2.45E-05 | 0.000264 |
| 2499   | 0.66401388  | 2.48E-05 | 0.000267 |
| 2645   | 0.645975608 | 2.50E-05 | 0.000269 |
| 8746   | 1.488291978 | 2.53E-05 | 0.000271 |
| 4902   | 1.484754618 | 2.53E-05 | 0.000272 |
| 976    | 0.552247726 | 2.55E-05 | 0.000274 |
| 2174   | 0.64038989  | 2.55E-05 | 0.000274 |
| 56521  | 1.530659632 | 2.57E-05 | 0.000276 |
| 8889   | 0.677205534 | 2.59E-05 | 0.000277 |
| 31     | 0.318740935 | 2.58E-05 | 0.000277 |
| 4988   | 1.536426863 | 2.63E-05 | 0.000281 |
| 9699   | 1.491447074 | 2.64E-05 | 0.000282 |
| 13405  | 1.46139795  | 2.65E-05 | 0.000283 |
| 42588  | 0.684903038 | 2.67E-05 | 0.000285 |
| 12147  | 0.672480776 | 2.67E-05 | 0.000285 |
| 7554   | 1.488704617 | 2.70E-05 | 0.000287 |
| 22103  | 1.544342047 | 2.72E-05 | 0.00029  |
| 7878   | 0.674689112 | 2.73E-05 | 0.00029  |
| 33356  | 1.493895911 | 2.77E-05 | 0.000294 |
| 505    | 0.557436613 | 2.78E-05 | 0.000295 |
| 1923   | 0.715870166 | 2.80E-05 | 0.000297 |
| 472889 | 0.694835389 | 2.83E-05 | 0.0003   |
| 287529 | 0.681377415 | 2.85E-05 | 0.000302 |
| 7435   | 1.518519839 | 2.87E-05 | 0.000304 |
| 709    | 0.621306597 | 2.89E-05 | 0.000305 |
| 913    | 0.588651351 | 2.93E-05 | 0.000309 |
| 18639  | 0.615859202 | 2.94E-05 | 0.00031  |
| 451    | 2.0086221   | 2.94E-05 | 0.00031  |
| 10853  | 0.696161911 | 2.95E-05 | 0.000311 |
| 16401  | 1.545625453 | 2.97E-05 | 0.000313 |
| 3645   | 0.673388691 | 2.98E-05 | 0.000314 |
| 29014  | 1.455904064 | 3.01E-05 | 0.000317 |
| 854    | 1.763564202 | 3.02E-05 | 0.000318 |
| 7923   | 1.534596991 | 3.05E-05 | 0.00032  |
| 386    | 2.20647954  | 3.07E-05 | 0.000322 |
| 4261   | 0.677153916 | 3.11E-05 | 0.000327 |
| 2501   | 1.680502478 | 3.13E-05 | 0.000328 |
| 3873   | 1.583840337 | 3.15E-05 | 0.000329 |
| 16364  | 1.502962387 | 3.15E-05 | 0.000329 |
| 30408  | 1.494225023 | 3.14E-05 | 0.000329 |
| 4429   | 0.692332665 | 3.18E-05 | 0.000333 |
| 429528 | 0.704121769 | 3.19E-05 | 0.000333 |
| 2558   | 1.62509087  | 3.21E-05 | 0.000335 |
| 6779   | 1.50586198  | 3.22E-05 | 0.000336 |
| 8833   | 1.503703099 | 3.24E-05 | 0.000338 |
| 3018   | 0.645508816 | 3.26E-05 | 0.00034  |
| 1390   | 0.575988151 | 3.28E-05 | 0.000341 |
| 146132 | 1.5034281   | 3.30E-05 | 0.000343 |
| 18660  | 1.480989846 | 3.36E-05 | 0.000349 |



|        |             |          |          |
|--------|-------------|----------|----------|
| 6099   | 1.529490796 | 3.36E-05 | 0.000349 |
| 7922   | 1.564006775 | 3.37E-05 | 0.00035  |
| 1662   | 0.657750627 | 3.38E-05 | 0.00035  |
| 2920   | 1.560446635 | 3.38E-05 | 0.00035  |
| 89     | 0.515868777 | 3.38E-05 | 0.00035  |
| 9885   | 0.610704917 | 3.39E-05 | 0.00035  |
| 2975   | 1.552922523 | 3.40E-05 | 0.000352 |
| 1307   | 0.592056368 | 3.41E-05 | 0.000353 |
| 4112   | 1.461706619 | 3.45E-05 | 0.000356 |
| 4484   | 0.711852959 | 3.48E-05 | 0.000359 |
| 275971 | 0.6911436   | 3.54E-05 | 0.000365 |
| 5336   | 1.505391456 | 3.54E-05 | 0.000365 |
| 6558   | 0.671411019 | 3.57E-05 | 0.000367 |
| 101    | 0.577104761 | 3.62E-05 | 0.000372 |
| 12926  | 1.480368263 | 3.65E-05 | 0.000375 |
| 3135   | 0.676892956 | 3.68E-05 | 0.000378 |
| 1410   | 0.652204143 | 3.71E-05 | 0.00038  |
| 6257   | 1.479988674 | 3.73E-05 | 0.000382 |
| 4556   | 1.492547713 | 3.73E-05 | 0.000382 |
| 5515   | 0.694062391 | 3.76E-05 | 0.000385 |
| 20191  | 0.677320296 | 3.80E-05 | 0.000389 |
| 9868   | 0.685398847 | 3.83E-05 | 0.000392 |
| 474    | 0.524336106 | 3.85E-05 | 0.000393 |
| 1746   | 0.623617238 | 3.87E-05 | 0.000395 |
| 760    | 0.630353068 | 3.89E-05 | 0.000397 |
| 317    | 0.482103961 | 3.91E-05 | 0.000399 |
| 1681   | 1.719428316 | 3.92E-05 | 0.000399 |
| 4471   | 1.514013633 | 3.93E-05 | 0.000399 |
| 8149   | 0.659731298 | 3.94E-05 | 0.000401 |
| 3040   | 0.634054677 | 3.98E-05 | 0.000404 |
| 442    | 0.554212749 | 3.98E-05 | 0.000404 |
| 8565   | 0.699432263 | 4.00E-05 | 0.000405 |
| 6403   | 0.676559188 | 4.00E-05 | 0.000405 |
| 4598   | 1.530559293 | 4.08E-05 | 0.000413 |
| 982    | 1.784405815 | 4.08E-05 | 0.000413 |
| 4073   | 1.534396206 | 4.12E-05 | 0.000417 |
| 2160   | 1.556733477 | 4.12E-05 | 0.000417 |
| 1476   | 1.633976286 | 4.13E-05 | 0.000418 |
| 8916   | 0.635889726 | 4.15E-05 | 0.000419 |
| 48462  | 1.475534363 | 4.16E-05 | 0.00042  |
| 787    | 1.670183459 | 4.21E-05 | 0.000424 |
| 67     | 0.380346435 | 4.26E-05 | 0.000429 |
| 23009  | 1.457774002 | 4.29E-05 | 0.000432 |
| 75     | 0.473563756 | 4.31E-05 | 0.000434 |
| 1157   | 0.599294925 | 4.34E-05 | 0.000436 |
| 41617  | 1.530915692 | 4.35E-05 | 0.000437 |
| 3456   | 0.642031128 | 4.39E-05 | 0.000441 |
| 1309   | 1.689310321 | 4.41E-05 | 0.000442 |
| 6340   | 0.681705197 | 4.42E-05 | 0.000443 |
| 9956   | 1.443203753 | 4.44E-05 | 0.000444 |
| 1778   | 1.605061587 | 4.47E-05 | 0.000447 |
| 2250   | 0.664858677 | 4.46E-05 | 0.000447 |

|       |             |          |          |
|-------|-------------|----------|----------|
| 5442  | 0.667818698 | 4.47E-05 | 0.000447 |
| 11401 | 1.507027581 | 4.48E-05 | 0.000448 |
| 87843 | 0.65156392  | 4.54E-05 | 0.000453 |
| 4     | 0.088953264 | 4.57E-05 | 0.000456 |
| 5603  | 1.548144428 | 4.59E-05 | 0.000457 |
| 4779  | 1.475411855 | 4.59E-05 | 0.000458 |
| 5485  | 0.701277145 | 4.62E-05 | 0.00046  |
| 6636  | 0.641182407 | 4.69E-05 | 0.000466 |
| 7034  | 1.491084375 | 4.71E-05 | 0.000469 |
| 316   | 0.537197573 | 4.73E-05 | 0.00047  |
| 2077  | 0.658935115 | 4.77E-05 | 0.000473 |
| 6881  | 0.676346808 | 4.82E-05 | 0.000478 |
| 7545  | 1.457199311 | 4.83E-05 | 0.000479 |
| 1297  | 0.607127411 | 4.84E-05 | 0.000479 |
| 8501  | 1.453416459 | 4.85E-05 | 0.00048  |
| 6231  | 0.637963321 | 4.86E-05 | 0.000481 |
| 9074  | 1.450930432 | 4.95E-05 | 0.000489 |
| 1747  | 0.612421408 | 4.98E-05 | 0.000492 |
| 9783  | 1.466472388 | 5.03E-05 | 0.000497 |
| 400   | 0.6068341   | 5.07E-05 | 0.0005   |
| 8057  | 0.685017063 | 5.08E-05 | 0.000501 |
| 329   | 0.535609707 | 5.09E-05 | 0.000501 |
| 177   | 0.544204665 | 5.11E-05 | 0.000503 |
| 3873  | 0.626556979 | 5.16E-05 | 0.000507 |
| 3054  | 1.541877899 | 5.22E-05 | 0.000513 |
| 1974  | 1.679851169 | 5.25E-05 | 0.000516 |
| 5865  | 0.626981886 | 5.29E-05 | 0.000519 |
| 1430  | 1.613420059 | 5.30E-05 | 0.00052  |
| 3413  | 0.656974518 | 5.31E-05 | 0.00052  |
| 9831  | 1.476392175 | 5.32E-05 | 0.000521 |
| 6530  | 0.692301627 | 5.33E-05 | 0.000521 |
| 33445 | 1.537663669 | 5.35E-05 | 0.000524 |
| 4041  | 0.678954757 | 5.37E-05 | 0.000525 |
| 5223  | 1.491770968 | 5.39E-05 | 0.000526 |
| 2222  | 0.655074724 | 5.39E-05 | 0.000526 |
| 4933  | 1.45757518  | 5.40E-05 | 0.000527 |
| 498   | 0.595992275 | 5.46E-05 | 0.000532 |
| 229   | 0.506071113 | 5.48E-05 | 0.000533 |
| 10559 | 1.465934669 | 5.49E-05 | 0.000535 |
| 5533  | 0.659498681 | 5.50E-05 | 0.000535 |
| 10538 | 1.293090279 | 5.53E-05 | 0.000537 |
| 36    | 0.298955692 | 5.55E-05 | 0.000539 |
| 2772  | 0.678817076 | 5.59E-05 | 0.000543 |
| 4131  | 1.492888575 | 5.61E-05 | 0.000544 |
| 5546  | 0.700244074 | 5.61E-05 | 0.000544 |
| 6455  | 1.510317248 | 5.69E-05 | 0.000551 |
| 6071  | 1.538272898 | 5.71E-05 | 0.000553 |
| 7879  | 1.478179951 | 5.77E-05 | 0.000558 |
| 331   | 0.530086179 | 5.79E-05 | 0.000559 |
| 3534  | 1.503583557 | 5.80E-05 | 0.00056  |
| 1438  | 0.663513784 | 5.81E-05 | 0.00056  |
| 941   | 1.724457559 | 5.81E-05 | 0.00056  |

|       |             |          |          |
|-------|-------------|----------|----------|
| 3340  | 0.680010631 | 5.94E-05 | 0.000573 |
| 22951 | 1.446585515 | 5.97E-05 | 0.000575 |
| 536   | 0.564807216 | 6.02E-05 | 0.00058  |
| 4859  | 0.660885476 | 6.03E-05 | 0.00058  |
| 427   | 1.998533203 | 6.06E-05 | 0.000582 |
| 4949  | 0.656134496 | 6.06E-05 | 0.000582 |
| 40    | 0.303304633 | 6.07E-05 | 0.000582 |
| 40    | 0.303304633 | 6.07E-05 | 0.000582 |
| 40    | 0.303304633 | 6.07E-05 | 0.000582 |
| 807   | 0.605303813 | 6.05E-05 | 0.000582 |
| 10826 | 0.701533765 | 6.09E-05 | 0.000583 |
| 2429  | 0.619872813 | 6.09E-05 | 0.000583 |
| 26233 | 0.684644355 | 6.17E-05 | 0.00059  |
| 34741 | 0.672575801 | 6.17E-05 | 0.00059  |
| 11208 | 0.684303559 | 6.18E-05 | 0.00059  |
| 4424  | 0.698932868 | 6.19E-05 | 0.000591 |
| 72042 | 1.422250261 | 6.24E-05 | 0.000595 |
| 3520  | 0.646499543 | 6.30E-05 | 0.0006   |
| 7584  | 0.679752709 | 6.30E-05 | 0.0006   |
| 0     | 0.182962728 | 6.35E-05 | 0.000604 |
| 5458  | 1.505320474 | 6.35E-05 | 0.000604 |
| 11953 | 1.433645128 | 6.35E-05 | 0.000604 |
| 2988  | 0.625800981 | 6.37E-05 | 0.000605 |
| 2147  | 1.560646832 | 6.41E-05 | 0.000608 |
| 72081 | 1.470553917 | 6.41E-05 | 0.000608 |
| 5157  | 1.414848857 | 6.45E-05 | 0.000612 |
| 2683  | 0.670151273 | 6.50E-05 | 0.000616 |
| 427   | 2.17041109  | 6.52E-05 | 0.000617 |
| 1443  | 0.600085507 | 6.56E-05 | 0.000621 |
| 627   | 1.954473037 | 6.58E-05 | 0.000622 |
| 28083 | 1.392792919 | 6.61E-05 | 0.000625 |
| 4833  | 1.523271068 | 6.66E-05 | 0.000629 |
| 1121  | 0.582058493 | 6.68E-05 | 0.00063  |
| 8421  | 0.70236546  | 6.68E-05 | 0.00063  |
| 1858  | 0.643680267 | 6.69E-05 | 0.000631 |
| 1038  | 1.561420023 | 6.70E-05 | 0.000631 |
| 2501  | 0.705898048 | 6.75E-05 | 0.000635 |
| 552   | 1.866458211 | 6.76E-05 | 0.000636 |
| 7178  | 1.453345158 | 6.77E-05 | 0.000636 |
| 17639 | 1.422696058 | 6.92E-05 | 0.000649 |
| 2047  | 0.612615372 | 6.97E-05 | 0.000654 |
| 4183  | 1.393373211 | 6.99E-05 | 0.000655 |
| 13667 | 0.69550319  | 7.04E-05 | 0.000659 |
| 230   | 0.480708945 | 7.05E-05 | 0.00066  |
| 3768  | 0.638646165 | 7.06E-05 | 0.00066  |
| 19717 | 0.687334345 | 7.07E-05 | 0.000661 |
| 1675  | 1.647686613 | 7.14E-05 | 0.000667 |
| 1048  | 1.636301127 | 7.17E-05 | 0.00067  |
| 4042  | 1.505732935 | 7.18E-05 | 0.00067  |
| 2305  | 0.655713455 | 7.25E-05 | 0.000676 |
| 1768  | 1.642803923 | 7.26E-05 | 0.000676 |
| 456   | 0.554458077 | 7.28E-05 | 0.000678 |

|        |             |          |          |
|--------|-------------|----------|----------|
| 5329   | 1.46398992  | 7.28E-05 | 0.000678 |
| 13944  | 1.435410264 | 7.31E-05 | 0.000679 |
| 2583   | 0.63473679  | 7.34E-05 | 0.000682 |
| 3976   | 1.508391204 | 7.36E-05 | 0.000683 |
| 2715   | 1.530299296 | 7.39E-05 | 0.000686 |
| 17768  | 0.668739044 | 7.40E-05 | 0.000686 |
| 1352   | 1.622933936 | 7.44E-05 | 0.000689 |
| 221    | 2.417183746 | 7.54E-05 | 0.000699 |
| 118609 | 1.436504273 | 7.58E-05 | 0.000701 |
| 2149   | 1.604691902 | 7.61E-05 | 0.000704 |
| 5708   | 1.516448201 | 7.74E-05 | 0.000715 |
| 6143   | 0.714961154 | 7.75E-05 | 0.000716 |
| 11184  | 1.389066954 | 7.95E-05 | 0.000734 |
| 0      | 0.019771325 | 7.97E-05 | 0.000735 |
| 861    | 1.683367001 | 8.06E-05 | 0.000743 |
| 15818  | 0.657118679 | 8.16E-05 | 0.000752 |
| 2077   | 1.600313809 | 8.18E-05 | 0.000754 |
| 11544  | 0.695467306 | 8.25E-05 | 0.000759 |
| 1422   | 0.651104906 | 8.28E-05 | 0.000761 |
| 4206   | 0.657500352 | 8.40E-05 | 0.000772 |
| 435    | 0.496795046 | 8.45E-05 | 0.000776 |
| 248    | 0.504760646 | 8.48E-05 | 0.000778 |
| 3232   | 1.447247862 | 8.57E-05 | 0.000787 |
| 1370   | 1.620805871 | 8.63E-05 | 0.000791 |
| 702    | 0.612278423 | 8.69E-05 | 0.000796 |
| 1677   | 0.669055037 | 8.70E-05 | 0.000797 |
| 43466  | 1.503064397 | 8.75E-05 | 0.000801 |
| 13433  | 1.438930338 | 8.84E-05 | 0.000809 |
| 3696   | 1.502371788 | 8.86E-05 | 0.000809 |
| 47420  | 0.689274889 | 8.85E-05 | 0.000809 |
| 4135   | 1.488270467 | 8.87E-05 | 0.000809 |
| 464    | 1.84164176  | 8.97E-05 | 0.000818 |
| 1609   | 1.544462907 | 8.99E-05 | 0.00082  |
| 2345   | 0.671859396 | 9.00E-05 | 0.00082  |
| 2450   | 0.660913972 | 9.02E-05 | 0.000821 |
| 1944   | 0.671092879 | 9.12E-05 | 0.000829 |
| 5870   | 1.45693594  | 9.13E-05 | 0.00083  |
| 457    | 1.905714616 | 9.19E-05 | 0.000835 |
| 4755   | 1.399741533 | 9.27E-05 | 0.000841 |
| 2360   | 0.702512688 | 9.32E-05 | 0.000845 |
| 5436   | 0.697019007 | 9.35E-05 | 0.000848 |
| 5831   | 1.369714936 | 9.35E-05 | 0.000848 |
| 2994   | 0.693838816 | 9.42E-05 | 0.000853 |
| 5936   | 0.68696671  | 9.45E-05 | 0.000855 |
| 13851  | 1.468202849 | 9.68E-05 | 0.000876 |
| 2619   | 0.622471346 | 9.70E-05 | 0.000877 |
| 5084   | 1.471707182 | 9.71E-05 | 0.000877 |
| 19169  | 0.688262961 | 9.74E-05 | 0.000879 |
| 3508   | 1.537250616 | 9.75E-05 | 0.00088  |
| 584    | 0.582569412 | 9.80E-05 | 0.000884 |
| 1835   | 1.515618165 | 9.85E-05 | 0.000888 |
| 10852  | 0.707649794 | 9.88E-05 | 0.000889 |

|        |             |          |          |
|--------|-------------|----------|----------|
| 2410   | 0.68919745  | 9.89E-05 | 0.00089  |
| 4257   | 1.477697965 | 9.91E-05 | 0.000891 |
| 5085   | 1.471846166 | 9.94E-05 | 0.000893 |
| 7337   | 1.48353637  | 9.95E-05 | 0.000893 |
| 5178   | 1.459774578 | 0.0001   | 0.0009   |
| 11786  | 0.703574877 | 0.0001   | 0.000901 |
| 7670   | 1.478578128 | 0.000101 | 0.000901 |
| 132156 | 0.659987814 | 0.000101 | 0.000901 |
| 9412   | 0.669599991 | 0.000101 | 0.000903 |
| 17187  | 1.509619763 | 0.000102 | 0.000915 |
| 26962  | 1.423002953 | 0.000102 | 0.000916 |
| 56     | 0.368226021 | 0.000103 | 0.000916 |
| 5992   | 0.651691652 | 0.000103 | 0.000921 |
| 4907   | 1.423471    | 0.000104 | 0.00093  |
| 4593   | 1.447083426 | 0.000105 | 0.000934 |
| 3602   | 0.659510646 | 0.000107 | 0.00095  |
| 340    | 0.577793049 | 0.000108 | 0.000962 |
| 5194   | 1.449285563 | 0.000108 | 0.000965 |
| 13793  | 1.398282337 | 0.000109 | 0.00097  |
| 404    | 1.890861664 | 0.000109 | 0.000972 |
| 9228   | 0.690483947 | 0.000111 | 0.000982 |
| 444    | 0.64174496  | 0.000112 | 0.000992 |
| 1975   | 1.433369357 | 0.000112 | 0.000994 |
| 2309   | 0.639099278 | 0.000112 | 0.000996 |
| 4270   | 1.443872359 | 0.000113 | 0.000998 |
| 2527   | 0.67514144  | 0.000114 | 0.001006 |
| 293    | 1.94023535  | 0.000114 | 0.001006 |
| 180    | 0.512817369 | 0.000114 | 0.00101  |
| 2938   | 1.45744927  | 0.000115 | 0.001017 |
| 30723  | 1.422693948 | 0.000116 | 0.001023 |
| 17260  | 1.419639461 | 0.000116 | 0.001027 |
| 9634   | 1.455748357 | 0.000116 | 0.001027 |
| 8512   | 1.436282367 | 0.000117 | 0.001028 |
| 1026   | 1.65538818  | 0.000117 | 0.001033 |
| 2002   | 0.681717221 | 0.000118 | 0.001037 |
| 3508   | 1.478132484 | 0.000118 | 0.001038 |
| 3304   | 0.649529696 | 0.00012  | 0.001056 |
| 21393  | 1.447108232 | 0.00012  | 0.001056 |
| 6187   | 1.444378303 | 0.000121 | 0.001061 |
| 35582  | 1.446201031 | 0.000123 | 0.001079 |
| 47364  | 1.424579918 | 0.000124 | 0.001085 |
| 985    | 0.658171466 | 0.000125 | 0.001091 |
| 35044  | 1.452216698 | 0.000125 | 0.001097 |
| 2804   | 1.503848291 | 0.000127 | 0.001116 |
| 11386  | 1.402260754 | 0.000128 | 0.001121 |
| 2987   | 1.524227104 | 0.000129 | 0.001127 |
| 22860  | 0.67199439  | 0.000129 | 0.001128 |
| 2945   | 0.695658839 | 0.000129 | 0.00113  |
| 2315   | 0.672325437 | 0.00013  | 0.001134 |
| 462193 | 0.70237767  | 0.000131 | 0.001143 |
| 3290   | 1.514850678 | 0.000131 | 0.001143 |
| 26821  | 1.435103508 | 0.000131 | 0.001144 |

|        |             |          |          |
|--------|-------------|----------|----------|
| 101113 | 0.68863329  | 0.000132 | 0.001152 |
| 25266  | 0.697400858 | 0.000133 | 0.001157 |
| 8545   | 1.427169587 | 0.000133 | 0.001158 |
| 15158  | 1.435242158 | 0.000134 | 0.001161 |
| 9292   | 1.463775642 | 0.000134 | 0.001166 |
| 1019   | 0.615715205 | 0.000135 | 0.00117  |
| 66     | 4.477933628 | 0.000136 | 0.001176 |
| 4614   | 0.706837903 | 0.000136 | 0.001176 |
| 15832  | 0.668339035 | 0.000136 | 0.001182 |
| 15187  | 1.415150198 | 0.000137 | 0.001185 |
| 11499  | 1.439820088 | 0.000137 | 0.001189 |
| 21434  | 0.677273146 | 0.000138 | 0.001194 |
| 3818   | 0.701190678 | 0.000138 | 0.001194 |
| 779    | 1.769077295 | 0.000139 | 0.001198 |
| 10006  | 1.431550081 | 0.000139 | 0.001201 |
| 3864   | 0.717448159 | 0.000139 | 0.001201 |
| 769    | 1.653502402 | 0.000139 | 0.001202 |
| 1834   | 1.611204833 | 0.00014  | 0.001204 |
| 5011   | 0.706597311 | 0.000141 | 0.001211 |
| 9050   | 0.685428314 | 0.000141 | 0.001216 |
| 76     | 0.420287754 | 0.000143 | 0.001227 |
| 242111 | 0.694954986 | 0.000143 | 0.001228 |
| 318    | 1.778082472 | 0.000143 | 0.001228 |
| 6290   | 1.472437737 | 0.000143 | 0.001228 |
| 13358  | 0.709274814 | 0.000143 | 0.001228 |
| 5171   | 1.420528222 | 0.000144 | 0.001235 |
| 4598   | 0.698678964 | 0.000146 | 0.001247 |
| 6179   | 1.455923483 | 0.000147 | 0.001256 |
| 1270   | 0.577035779 | 0.000147 | 0.001261 |
| 1854   | 1.5822734   | 0.000148 | 0.001267 |
| 7535   | 0.704623697 | 0.000149 | 0.00127  |
| 1673   | 0.655836395 | 0.00015  | 0.001277 |
| 3670   | 0.691598145 | 0.00015  | 0.001278 |
| 3113   | 1.500880339 | 0.00015  | 0.001278 |
| 4275   | 0.67438239  | 0.00015  | 0.001279 |
| 2028   | 0.674820264 | 0.00015  | 0.001279 |
| 3188   | 1.477583834 | 0.000151 | 0.001282 |
| 2935   | 0.686793928 | 0.000151 | 0.001285 |
| 92     | 0.447842302 | 0.000151 | 0.001287 |
| 9726   | 1.382566368 | 0.000152 | 0.001296 |
| 816    | 1.740640726 | 0.000153 | 0.001296 |
| 1776   | 0.66871838  | 0.000153 | 0.001301 |
| 8464   | 1.42244302  | 0.000154 | 0.001309 |
| 69     | 0.369678648 | 0.000154 | 0.00131  |
| 160624 | 0.696191229 | 0.000155 | 0.001314 |
| 10266  | 1.415217161 | 0.000156 | 0.00132  |
| 17401  | 1.443851854 | 0.000157 | 0.001333 |
| 3038   | 1.506046709 | 0.000159 | 0.001342 |
| 1355   | 1.639171441 | 0.000159 | 0.001343 |
| 1730   | 1.461150725 | 0.000159 | 0.001343 |
| 3563   | 0.694269507 | 0.00016  | 0.001347 |
| 4510   | 0.684792763 | 0.00016  | 0.001348 |

|        |             |          |          |
|--------|-------------|----------|----------|
| 812    | 0.646632286 | 0.000163 | 0.001371 |
| 34585  | 0.706123228 | 0.000163 | 0.001375 |
| 192    | 0.498748545 | 0.000163 | 0.001376 |
| 690    | 1.667808554 | 0.000163 | 0.001376 |
| 1147   | 1.625640837 | 0.000165 | 0.001387 |
| 14209  | 1.421035942 | 0.000166 | 0.001392 |
| 286    | 2.020078026 | 0.000166 | 0.001395 |
| 14574  | 0.665382651 | 0.000166 | 0.001397 |
| 795    | 0.60502074  | 0.000167 | 0.001398 |
| 30059  | 0.714320424 | 0.000167 | 0.001398 |
| 4139   | 0.676587293 | 0.000167 | 0.001398 |
| 2493   | 1.57889984  | 0.000167 | 0.001398 |
| 19259  | 1.423054962 | 0.000168 | 0.001403 |
| 1659   | 0.627249895 | 0.000169 | 0.001413 |
| 2042   | 1.541863472 | 0.000171 | 0.001425 |
| 3282   | 0.648645933 | 0.00017  | 0.001425 |
| 15532  | 0.676789864 | 0.000171 | 0.001427 |
| 335    | 0.528472022 | 0.000171 | 0.001431 |
| 3360   | 1.459690225 | 0.000172 | 0.001432 |
| 10566  | 1.417425676 | 0.000172 | 0.001435 |
| 2530   | 0.657796925 | 0.000172 | 0.001435 |
| 8422   | 1.394113066 | 0.000174 | 0.001446 |
| 22291  | 1.42874093  | 0.000175 | 0.001455 |
| 230    | 0.509637663 | 0.000175 | 0.001455 |
| 23406  | 0.696841051 | 0.000176 | 0.001463 |
| 15677  | 0.682398186 | 0.000176 | 0.001464 |
| 2576   | 0.71167938  | 0.000177 | 0.00147  |
| 8023   | 1.420257446 | 0.000179 | 0.001485 |
| 13395  | 1.433677987 | 0.000179 | 0.001488 |
| 8429   | 1.464235067 | 0.00018  | 0.001491 |
| 15703  | 1.414067004 | 0.00018  | 0.001491 |
| 8836   | 1.407936781 | 0.00018  | 0.001491 |
| 900    | 0.595372702 | 0.000181 | 0.001495 |
| 5305   | 0.697109292 | 0.000182 | 0.001502 |
| 130407 | 0.704811567 | 0.000182 | 0.001505 |
| 162    | 0.630358534 | 0.000183 | 0.001516 |
| 1710   | 1.406729805 | 0.000184 | 0.001519 |
| 5833   | 0.7344978   | 0.000184 | 0.001521 |
| 807    | 1.716609794 | 0.000185 | 0.001522 |
| 3315   | 0.69448829  | 0.000186 | 0.001531 |
| 1030   | 0.648090736 | 0.000186 | 0.001532 |
| 520    | 1.693763772 | 0.000189 | 0.001551 |
| 35     | 0.332092711 | 0.000189 | 0.001551 |
| 2855   | 0.698611657 | 0.000189 | 0.001558 |
| 3605   | 0.670447367 | 0.00019  | 0.001565 |
| 79314  | 0.716267576 | 0.000191 | 0.001568 |
| 748    | 1.810907643 | 0.000191 | 0.00157  |
| 465    | 1.933885999 | 0.000193 | 0.001583 |
| 245    | 2.151124119 | 0.000194 | 0.001587 |
| 118    | 0.527597461 | 0.000197 | 0.001611 |
| 15576  | 0.714696549 | 0.000197 | 0.001612 |
| 520    | 0.564255607 | 0.000197 | 0.001613 |

|        |             |          |          |
|--------|-------------|----------|----------|
| 2169   | 0.650769999 | 0.000198 | 0.001614 |
| 342    | 0.511426431 | 0.000198 | 0.001614 |
| 1097   | 0.673317859 | 0.000197 | 0.001614 |
| 1719   | 0.638947943 | 0.000198 | 0.001615 |
| 5082   | 1.455382417 | 0.000198 | 0.001615 |
| 6345   | 1.430455127 | 0.000198 | 0.001615 |
| 2421   | 1.48544129  | 0.000198 | 0.001616 |
| 289    | 2.136333904 | 0.000201 | 0.001639 |
| 38869  | 0.694965936 | 0.000202 | 0.001643 |
| 5318   | 1.445240168 | 0.000204 | 0.001657 |
| 3258   | 0.70395022  | 0.000205 | 0.001668 |
| 6537   | 1.436262874 | 0.000206 | 0.001671 |
| 2459   | 0.760749674 | 0.000206 | 0.001674 |
| 3119   | 0.69897571  | 0.000206 | 0.001675 |
| 32869  | 1.483290781 | 0.000207 | 0.001677 |
| 12005  | 0.660272816 | 0.000209 | 0.001697 |
| 2046   | 0.724797044 | 0.000209 | 0.001697 |
| 12005  | 1.459763702 | 0.000214 | 0.001731 |
| 680    | 0.591759777 | 0.000215 | 0.00174  |
| 12632  | 0.700151475 | 0.000215 | 0.001741 |
| 5160   | 1.454484593 | 0.000216 | 0.001748 |
| 26954  | 0.706668878 | 0.000217 | 0.001752 |
| 2568   | 1.620351748 | 0.000218 | 0.001757 |
| 5270   | 0.674796381 | 0.000218 | 0.001762 |
| 4334   | 1.458176052 | 0.000219 | 0.001763 |
| 21814  | 0.721578579 | 0.000219 | 0.001765 |
| 1258   | 1.530859738 | 0.00022  | 0.001775 |
| 2390   | 0.695841162 | 0.000221 | 0.001778 |
| 9703   | 0.711816394 | 0.000221 | 0.001778 |
| 563    | 1.679337978 | 0.000221 | 0.001778 |
| 6557   | 1.428711868 | 0.000223 | 0.001791 |
| 920    | 1.638815603 | 0.000223 | 0.001793 |
| 3247   | 1.400349265 | 0.000224 | 0.001795 |
| 187    | 0.564487351 | 0.000224 | 0.001795 |
| 2837   | 1.458103417 | 0.000224 | 0.001798 |
| 3198   | 0.696671623 | 0.000224 | 0.001798 |
| 2176   | 1.527475457 | 0.000226 | 0.001807 |
| 9370   | 0.703659802 | 0.000226 | 0.001807 |
| 30     | 0.301794425 | 0.000227 | 0.001818 |
| 338939 | 0.727957054 | 0.000228 | 0.001825 |
| 113971 | 0.719741512 | 0.000231 | 0.00185  |
| 12730  | 1.401257805 | 0.000233 | 0.001859 |
| 3104   | 0.707797762 | 0.000233 | 0.001859 |
| 4245   | 1.46760282  | 0.000233 | 0.001862 |
| 2708   | 1.48634682  | 0.000235 | 0.001874 |
| 8483   | 1.403307016 | 0.000236 | 0.001882 |
| 6890   | 0.664752031 | 0.000236 | 0.001882 |
| 10369  | 0.658937731 | 0.000238 | 0.001895 |
| 8679   | 1.4047839   | 0.00024  | 0.001906 |
| 328    | 1.911017017 | 0.00024  | 0.001907 |
| 4563   | 0.710451854 | 0.000241 | 0.001915 |
| 4334   | 0.720092417 | 0.000242 | 0.001926 |



|       |             |          |          |
|-------|-------------|----------|----------|
| 6012  | 1.421098925 | 0.000245 | 0.001942 |
| 4813  | 1.426229501 | 0.000245 | 0.001942 |
| 5474  | 0.73982857  | 0.000245 | 0.001943 |
| 227   | 0.560047157 | 0.000247 | 0.001953 |
| 3804  | 0.733576296 | 0.000247 | 0.001953 |
| 5612  | 1.441220487 | 0.000248 | 0.001962 |
| 375   | 0.628815661 | 0.000249 | 0.001972 |
| 144   | 2.147973653 | 0.00025  | 0.001978 |
| 10091 | 1.476028141 | 0.000251 | 0.00198  |
| 7831  | 0.723455454 | 0.000251 | 0.001981 |
| 29489 | 0.709544367 | 0.000252 | 0.001986 |
| 1212  | 0.680579343 | 0.000257 | 0.002027 |
| 6167  | 1.47217402  | 0.000257 | 0.002028 |
| 892   | 1.643881285 | 0.000259 | 0.002041 |
| 1505  | 0.681228222 | 0.000261 | 0.002055 |
| 9284  | 0.753934402 | 0.000261 | 0.002055 |
| 4884  | 0.707604503 | 0.000262 | 0.002065 |
| 3255  | 0.721353134 | 0.000263 | 0.002065 |
| 13794 | 1.426493913 | 0.000264 | 0.002077 |
| 1807  | 1.690755886 | 0.000264 | 0.002077 |
| 4970  | 0.678467131 | 0.000267 | 0.002095 |
| 6049  | 0.713010467 | 0.000267 | 0.002096 |
| 5029  | 0.684991895 | 0.000269 | 0.002107 |
| 5683  | 1.402290798 | 0.000269 | 0.002111 |
| 10479 | 1.409413186 | 0.000271 | 0.002121 |
| 6582  | 0.743705295 | 0.000272 | 0.002128 |
| 22180 | 1.38945508  | 0.000272 | 0.002129 |
| 3206  | 1.456229009 | 0.000273 | 0.002132 |
| 20316 | 0.730083812 | 0.000274 | 0.002142 |
| 11185 | 0.699277696 | 0.000275 | 0.002145 |
| 1685  | 1.457240684 | 0.000276 | 0.002154 |
| 42    | 7.371122696 | 0.000277 | 0.002163 |
| 863   | 0.630361924 | 0.000278 | 0.002163 |
| 849   | 1.653024092 | 0.000277 | 0.002163 |
| 1915  | 0.699363664 | 0.000278 | 0.002167 |
| 3880  | 0.628517274 | 0.000278 | 0.002167 |
| 1488  | 0.639955439 | 0.000279 | 0.002171 |
| 6667  | 1.461663152 | 0.00028  | 0.002178 |
| 14690 | 1.384370499 | 0.00028  | 0.002178 |
| 2653  | 1.485438077 | 0.000281 | 0.002185 |
| 20787 | 1.423363758 | 0.000282 | 0.002188 |
| 43176 | 1.457778552 | 0.000282 | 0.002189 |
| 21518 | 0.691852685 | 0.000282 | 0.00219  |
| 218   | 0.590534985 | 0.000284 | 0.0022   |
| 866   | 0.662582063 | 0.000285 | 0.002208 |
| 3365  | 1.398165315 | 0.000286 | 0.002217 |
| 24561 | 0.704575184 | 0.000287 | 0.002223 |
| 4170  | 0.707953384 | 0.00029  | 0.002239 |
| 7154  | 0.725580374 | 0.00029  | 0.002243 |
| 33442 | 1.413036463 | 0.000291 | 0.002245 |
| 24470 | 1.400679759 | 0.000291 | 0.002249 |
| 1914  | 0.649385465 | 0.000292 | 0.002256 |

|        |             |          |          |
|--------|-------------|----------|----------|
| 6343   | 0.712094577 | 0.000293 | 0.002256 |
| 8899   | 0.724161223 | 0.000293 | 0.002256 |
| 18549  | 1.4012168   | 0.000294 | 0.002263 |
| 1081   | 1.639295309 | 0.000295 | 0.002273 |
| 5583   | 0.736039923 | 0.000295 | 0.002273 |
| 2871   | 0.706361601 | 0.000296 | 0.002274 |
| 11176  | 1.3902512   | 0.000298 | 0.002289 |
| 2572   | 1.469659471 | 0.000299 | 0.002297 |
| 16036  | 1.421248313 | 0.000299 | 0.002299 |
| 2948   | 1.438943308 | 0.0003   | 0.002299 |
| 7620   | 1.358590799 | 0.0003   | 0.0023   |
| 4115   | 1.470415805 | 0.000301 | 0.002303 |
| 5491   | 1.401031898 | 0.0003   | 0.002303 |
| 7272   | 0.698443697 | 0.000301 | 0.002306 |
| 252    | 0.579130091 | 0.000302 | 0.002314 |
| 1171   | 1.59698844  | 0.000306 | 0.002339 |
| 4852   | 1.417157152 | 0.000306 | 0.002342 |
| 11769  | 1.426213129 | 0.000307 | 0.002346 |
| 1747   | 1.581943394 | 0.000308 | 0.00235  |
| 10562  | 0.714979634 | 0.000308 | 0.00235  |
| 873    | 0.646578695 | 0.000309 | 0.002355 |
| 2284   | 1.429863807 | 0.000309 | 0.002359 |
| 3476   | 1.492633933 | 0.000311 | 0.002369 |
| 5280   | 0.608315165 | 0.000312 | 0.002375 |
| 540    | 1.787591867 | 0.000313 | 0.002385 |
| 1231   | 1.627853806 | 0.000314 | 0.002386 |
| 1265   | 1.586803551 | 0.000314 | 0.002389 |
| 2270   | 1.436755635 | 0.000316 | 0.002401 |
| 11233  | 0.718452295 | 0.000316 | 0.002403 |
| 1883   | 0.696013597 | 0.000317 | 0.002408 |
| 59     | 3.577001961 | 0.000321 | 0.002434 |
| 3063   | 0.655703294 | 0.000324 | 0.002458 |
| 1491   | 0.646109212 | 0.00033  | 0.002497 |
| 702    | 0.659269301 | 0.00033  | 0.0025   |
| 4549   | 1.413386367 | 0.000331 | 0.002509 |
| 154    | 0.497683114 | 0.000334 | 0.002524 |
| 24552  | 1.415008244 | 0.000335 | 0.002534 |
| 2024   | 1.490794922 | 0.000335 | 0.002535 |
| 24003  | 1.395421024 | 0.000336 | 0.002536 |
| 178    | 0.566617718 | 0.000337 | 0.002547 |
| 3685   | 1.475575362 | 0.000338 | 0.002552 |
| 9181   | 1.376547324 | 0.00034  | 0.002564 |
| 1887   | 0.694524042 | 0.000341 | 0.002569 |
| 39928  | 1.408885097 | 0.000344 | 0.00259  |
| 1784   | 1.538812338 | 0.000345 | 0.002598 |
| 129729 | 1.351815767 | 0.000349 | 0.002625 |
| 1148   | 1.496615904 | 0.000352 | 0.002646 |
| 7608   | 0.727030615 | 0.000353 | 0.002656 |
| 1549   | 0.661345829 | 0.000354 | 0.002658 |
| 124    | 0.53457017  | 0.000354 | 0.002658 |
| 1291   | 0.65975122  | 0.000354 | 0.002661 |
| 19596  | 0.726032872 | 0.000355 | 0.002662 |

|        |             |          |          |
|--------|-------------|----------|----------|
| 30392  | 1.389838357 | 0.000356 | 0.002671 |
| 7942   | 0.713006732 | 0.000359 | 0.00269  |
| 174065 | 0.720460529 | 0.000359 | 0.002692 |
| 6150   | 0.731243389 | 0.00036  | 0.002696 |
| 8892   | 1.39327574  | 0.000361 | 0.002699 |
| 1139   | 1.644546443 | 0.000361 | 0.002699 |
| 9611   | 1.425920757 | 0.000364 | 0.002717 |
| 15657  | 0.718801343 | 0.000364 | 0.002718 |
| 2698   | 1.456657828 | 0.000367 | 0.002739 |
| 3540   | 0.711129511 | 0.000368 | 0.002743 |
| 3938   | 1.426121965 | 0.000373 | 0.00278  |
| 1074   | 0.629641157 | 0.000375 | 0.002799 |
| 1172   | 0.662469232 | 0.000376 | 0.002799 |
| 3193   | 0.711425348 | 0.000376 | 0.002799 |
| 1076   | 0.634914279 | 0.000377 | 0.002808 |
| 2248   | 1.527811926 | 0.000381 | 0.002831 |
| 42270  | 0.719313129 | 0.000382 | 0.002839 |
| 6623   | 0.741413875 | 0.000386 | 0.002865 |
| 5150   | 1.424039358 | 0.000387 | 0.002876 |
| 14583  | 1.368266683 | 0.000387 | 0.002876 |
| 689    | 0.686386509 | 0.000391 | 0.002901 |
| 6787   | 1.39481556  | 0.000395 | 0.002928 |
| 2308   | 0.694433297 | 0.000397 | 0.002939 |
| 15819  | 0.754402423 | 0.0004   | 0.00296  |
| 5436   | 0.695669382 | 0.0004   | 0.00296  |
| 3398   | 1.443468065 | 0.0004   | 0.00296  |
| 3758   | 0.684416837 | 0.000402 | 0.00297  |
| 9772   | 0.698942219 | 0.000402 | 0.00297  |
| 19644  | 0.748156143 | 0.000402 | 0.002972 |
| 6990   | 1.377627547 | 0.000404 | 0.002983 |
| 3404   | 1.436668378 | 0.000404 | 0.002984 |
| 1090   | 0.62682055  | 0.000405 | 0.002988 |
| 1418   | 0.674421599 | 0.000406 | 0.002988 |
| 1051   | 0.657697275 | 0.000405 | 0.002988 |
| 57309  | 1.438552027 | 0.000407 | 0.002999 |
| 4359   | 1.411302072 | 0.000407 | 0.002999 |
| 7753   | 0.737715845 | 0.000408 | 0.002999 |
| 9964   | 0.681828288 | 0.000409 | 0.003011 |
| 1218   | 1.626514578 | 0.000411 | 0.003017 |
| 3928   | 0.725370152 | 0.000412 | 0.003029 |
| 788    | 1.59414751  | 0.000413 | 0.003034 |
| 1955   | 1.551066371 | 0.000415 | 0.003044 |
| 708    | 1.645359397 | 0.000415 | 0.003045 |
| 18327  | 0.731800536 | 0.000416 | 0.003049 |
| 564    | 1.800932152 | 0.000417 | 0.003055 |
| 704    | 0.687002794 | 0.000418 | 0.003057 |
| 1844   | 0.714992348 | 0.000419 | 0.003067 |
| 2817   | 1.45437182  | 0.00042  | 0.003074 |
| 1448   | 0.726008037 | 0.000421 | 0.003075 |
| 95     | 0.39073248  | 0.000421 | 0.003075 |
| 6296   | 0.726477893 | 0.000423 | 0.00309  |
| 42291  | 1.395413363 | 0.000424 | 0.003093 |

|         |             |          |          |
|---------|-------------|----------|----------|
| 6 Inf   |             | 0.000426 | 0.003106 |
| 10515   | 0.698868268 | 0.000431 | 0.00314  |
| 37894   | 1.401993549 | 0.000436 | 0.003173 |
| 1380447 | 0.773168163 | 0.000436 | 0.003173 |
| 10555   | 1.405033983 | 0.000436 | 0.003173 |
| 53887   | 1.430687117 | 0.000445 | 0.003238 |
| 1429    | 0.68993734  | 0.000445 | 0.003238 |
| 10020   | 0.726777127 | 0.000447 | 0.003251 |
| 663     | 0.655512709 | 0.000448 | 0.003252 |
| 3603    | 1.447779934 | 0.00045  | 0.00327  |
| 10944   | 0.731829021 | 0.000455 | 0.003301 |
| 1942    | 1.472939509 | 0.000458 | 0.003319 |
| 58067   | 0.711538535 | 0.00046  | 0.003336 |
| 1599    | 0.670820742 | 0.000463 | 0.003351 |
| 14873   | 1.384187858 | 0.000464 | 0.003362 |
| 5322    | 1.425202217 | 0.000464 | 0.003362 |
| 23285   | 0.718441747 | 0.000468 | 0.003388 |
| 7307    | 0.740581219 | 0.000469 | 0.003392 |
| 814     | 1.55650963  | 0.000469 | 0.003392 |
| 130     | 0.600674609 | 0.000471 | 0.003403 |
| 6564    | 1.378780994 | 0.000474 | 0.00342  |
| 13117   | 1.392273888 | 0.000475 | 0.003429 |
| 915     | 1.570834883 | 0.000477 | 0.003439 |
| 10584   | 1.430517942 | 0.000477 | 0.003439 |
| 971     | 1.59666001  | 0.00048  | 0.003456 |
| 2051    | 0.7058975   | 0.00048  | 0.003456 |
| 1181    | 1.551648753 | 0.00048  | 0.003458 |
| 48      | 0.434615207 | 0.000483 | 0.003472 |
| 4451    | 0.703912472 | 0.000483 | 0.003476 |
| 1426    | 0.698319134 | 0.000485 | 0.003484 |
| 8501    | 1.394319682 | 0.000487 | 0.003501 |
| 1185    | 1.56344792  | 0.000489 | 0.003507 |
| 4332    | 1.409794685 | 0.000489 | 0.003509 |
| 32719   | 0.728270526 | 0.000489 | 0.003509 |
| 32044   | 1.390027602 | 0.000489 | 0.003509 |
| 3122    | 1.400064889 | 0.00049  | 0.003509 |
| 90943   | 1.425398165 | 0.000491 | 0.003519 |
| 17504   | 0.722069437 | 0.000493 | 0.00353  |
| 9973    | 1.438760981 | 0.000497 | 0.003552 |
| 1307    | 1.576769788 | 0.000497 | 0.003552 |
| 1329    | 0.716424206 | 0.000497 | 0.003553 |
| 637     | 0.578139616 | 0.000497 | 0.003553 |
| 4423    | 0.711248732 | 0.000499 | 0.00356  |
| 83389   | 1.373980632 | 0.000504 | 0.003593 |
| 9506    | 1.41743868  | 0.000506 | 0.003606 |
| 2513    | 1.44542737  | 0.000506 | 0.003606 |
| 3939    | 1.324682054 | 0.000508 | 0.003615 |
| 12022   | 0.734128526 | 0.000508 | 0.003615 |
| 1737    | 0.707161785 | 0.000508 | 0.003616 |
| 22692   | 1.405930284 | 0.00051  | 0.003627 |
| 5342    | 0.743795867 | 0.00051  | 0.003629 |
| 523     | 1.854437961 | 0.000512 | 0.003639 |

|        |             |          |          |
|--------|-------------|----------|----------|
| 2558   | 1.482377536 | 0.000513 | 0.003641 |
| 13415  | 1.379440418 | 0.000514 | 0.003651 |
| 1810   | 1.511690999 | 0.000515 | 0.003657 |
| 19918  | 0.70779689  | 0.000517 | 0.003666 |
| 1181   | 0.613792244 | 0.000518 | 0.003672 |
| 10     | 0.309174384 | 0.000519 | 0.003676 |
| 878275 | 0.747745443 | 0.00052  | 0.003679 |
| 14759  | 0.722344724 | 0.00052  | 0.00368  |
| 2294   | 0.638555803 | 0.00052  | 0.003681 |
| 4875   | 1.419796049 | 0.000521 | 0.003683 |
| 3703   | 0.70980528  | 0.000521 | 0.003684 |
| 4029   | 0.71351093  | 0.000523 | 0.003694 |
| 48109  | 0.707570237 | 0.000524 | 0.003703 |
| 236    | 0.493996217 | 0.000525 | 0.003703 |
| 1848   | 0.684914045 | 0.000525 | 0.003703 |
| 2202   | 0.635477213 | 0.000525 | 0.003703 |
| 2180   | 0.708414255 | 0.000531 | 0.003745 |
| 12516  | 1.385305087 | 0.000535 | 0.003766 |
| 2138   | 1.465178416 | 0.000538 | 0.003785 |
| 5658   | 0.726422942 | 0.000538 | 0.003787 |
| 17866  | 0.736741286 | 0.000541 | 0.003803 |
| 2578   | 1.476980825 | 0.000543 | 0.003819 |
| 2442   | 0.679541119 | 0.000544 | 0.003821 |
| 41898  | 1.407381113 | 0.000547 | 0.003837 |
| 12695  | 1.380278851 | 0.000548 | 0.003847 |
| 21710  | 1.434867648 | 0.000549 | 0.003849 |
| 17     | 10.56108416 | 0.000549 | 0.003849 |
| 3155   | 0.726014182 | 0.000549 | 0.003849 |
| 1151   | 0.650403123 | 0.000553 | 0.00387  |
| 7929   | 0.721816645 | 0.000554 | 0.003878 |
| 4555   | 1.400821142 | 0.000556 | 0.003887 |
| 30     | 0.340288803 | 0.00056  | 0.003915 |
| 10927  | 0.718103697 | 0.000561 | 0.003919 |
| 3858   | 1.464762194 | 0.000561 | 0.003921 |
| 6183   | 1.441615789 | 0.000565 | 0.003943 |
| 1644   | 0.629492361 | 0.000565 | 0.003945 |
| 10826  | 0.756535006 | 0.000566 | 0.003947 |
| 764    | 1.638730809 | 0.000574 | 0.003997 |
| 25390  | 1.438663786 | 0.000574 | 0.003997 |
| 1790   | 0.681389236 | 0.000578 | 0.004028 |
| 8707   | 0.77502002  | 0.000579 | 0.004029 |
| 3777   | 0.738455846 | 0.000581 | 0.004041 |
| 20919  | 0.725319918 | 0.000581 | 0.004041 |
| 1905   | 0.693641336 | 0.000581 | 0.004042 |
| 2542   | 1.459025494 | 0.000582 | 0.004043 |
| 1420   | 1.524607989 | 0.00059  | 0.004099 |
| 2753   | 0.716465101 | 0.000592 | 0.004112 |
| 0      | 0           | 0.000597 | 0.004145 |
| 3422   | 0.708250695 | 0.000601 | 0.004166 |
| 10476  | 0.732624315 | 0.000603 | 0.004178 |
| 1548   | 0.641286383 | 0.000605 | 0.004189 |
| 18696  | 1.420195035 | 0.000606 | 0.004193 |

|       |             |          |          |
|-------|-------------|----------|----------|
| 2370  | 1.389183169 | 0.000606 | 0.004196 |
| 2738  | 1.439646219 | 0.00061  | 0.004222 |
| 1532  | 1.538218259 | 0.000616 | 0.004257 |
| 3108  | 1.415848099 | 0.000621 | 0.004291 |
| 31566 | 1.413137914 | 0.000623 | 0.004306 |
| 28822 | 1.372368357 | 0.000628 | 0.004335 |
| 2053  | 0.666724651 | 0.000632 | 0.004358 |
| 1704  | 1.436289836 | 0.000634 | 0.004374 |
| 18767 | 0.738437467 | 0.000637 | 0.004393 |
| 2464  | 1.484339819 | 0.000638 | 0.004399 |
| 3365  | 0.727153191 | 0.00064  | 0.004403 |
| 4194  | 1.432759645 | 0.000639 | 0.004403 |
| 2891  | 1.476791245 | 0.000641 | 0.004407 |
| 1043  | 0.663687898 | 0.000642 | 0.004417 |
| 17682 | 0.727965416 | 0.000645 | 0.004434 |
| 3858  | 0.712398599 | 0.000645 | 0.004434 |
| 9951  | 0.739955048 | 0.000652 | 0.004475 |
| 8915  | 0.757596265 | 0.000652 | 0.004475 |
| 14503 | 1.401353111 | 0.000653 | 0.004478 |
| 5069  | 1.348509909 | 0.000654 | 0.004483 |
| 10926 | 1.362999746 | 0.000654 | 0.004484 |
| 18920 | 1.348076422 | 0.000655 | 0.004486 |
| 4062  | 1.444700863 | 0.000656 | 0.004489 |
| 7054  | 0.737049528 | 0.000656 | 0.004489 |
| 930   | 0.645941575 | 0.000656 | 0.004489 |
| 9690  | 1.38722461  | 0.000658 | 0.004497 |
| 8918  | 0.728727996 | 0.000662 | 0.004523 |
| 65731 | 1.411681647 | 0.000664 | 0.004534 |
| 1052  | 0.669157191 | 0.000666 | 0.004549 |
| 1374  | 1.552057235 | 0.000669 | 0.004567 |
| 981   | 1.58724596  | 0.000671 | 0.004572 |
| 34697 | 1.432673504 | 0.000671 | 0.004572 |
| 2957  | 0.729919995 | 0.000677 | 0.004615 |
| 2040  | 1.47527256  | 0.000679 | 0.004622 |
| 55904 | 1.437781272 | 0.000679 | 0.004622 |
| 5425  | 1.381069775 | 0.000686 | 0.004667 |
| 19947 | 1.36365102  | 0.000687 | 0.00467  |
| 4150  | 1.435048505 | 0.000689 | 0.004682 |
| 9620  | 1.411464759 | 0.000689 | 0.004682 |
| 2066  | 1.459113581 | 0.000691 | 0.004691 |
| 643   | 1.637688612 | 0.000692 | 0.004698 |
| 546   | 1.743354997 | 0.000693 | 0.004699 |
| 3499  | 0.666101588 | 0.000695 | 0.004713 |
| 3385  | 1.37433029  | 0.000699 | 0.00474  |
| 31314 | 0.73616179  | 0.000701 | 0.004746 |
| 15029 | 0.745495994 | 0.000701 | 0.004747 |
| 3486  | 0.70279949  | 0.000703 | 0.004754 |
| 16699 | 1.362168431 | 0.000703 | 0.004754 |
| 7149  | 1.393517708 | 0.000703 | 0.004754 |
| 398   | 0.5711937   | 0.000704 | 0.00476  |
| 31014 | 1.381944047 | 0.000708 | 0.004783 |
| 751   | 1.687950756 | 0.000709 | 0.004787 |

|        |             |          |          |
|--------|-------------|----------|----------|
| 4004   | 1.439387568 | 0.000711 | 0.004798 |
| 21     | 0.309451585 | 0.000712 | 0.004802 |
| 7191   | 1.371129226 | 0.000713 | 0.00481  |
| 3943   | 0.752470944 | 0.000716 | 0.004822 |
| 1735   | 0.706133212 | 0.000716 | 0.004825 |
| 176    | 0.540434316 | 0.000717 | 0.004825 |
| 26879  | 1.400640081 | 0.000719 | 0.004834 |
| 2311   | 0.711464311 | 0.00072  | 0.004839 |
| 8289   | 1.410084096 | 0.000722 | 0.004852 |
| 7217   | 0.665909527 | 0.000723 | 0.004861 |
| 4221   | 0.711675936 | 0.000726 | 0.004877 |
| 1269   | 1.572536494 | 0.000728 | 0.004889 |
| 1144   | 0.739286509 | 0.00073  | 0.004901 |
| 487    | 0.649344605 | 0.000734 | 0.004919 |
| 16611  | 1.340829414 | 0.000746 | 0.004999 |
| 338    | 1.909474561 | 0.000746 | 0.005    |
| 14636  | 1.371103984 | 0.000749 | 0.005015 |
| 103796 | 0.712682227 | 0.000752 | 0.005031 |
| 24903  | 1.370883068 | 0.000754 | 0.005045 |
| 1589   | 0.640945668 | 0.000758 | 0.005067 |
| 3547   | 1.389476348 | 0.00076  | 0.005076 |
| 8464   | 1.373048546 | 0.000762 | 0.005088 |
| 3651   | 0.735072471 | 0.000763 | 0.005097 |
| 351    | 1.665007363 | 0.000766 | 0.005111 |
| 17546  | 1.376725153 | 0.000769 | 0.005127 |
| 2619   | 1.505184973 | 0.000776 | 0.005172 |
| 329    | 0.578339309 | 0.000779 | 0.00519  |
| 644    | 1.620314071 | 0.00078  | 0.005195 |
| 1681   | 1.390893142 | 0.000781 | 0.005202 |
| 1421   | 1.516060113 | 0.000782 | 0.005205 |
| 5817   | 1.382614952 | 0.000783 | 0.005209 |
| 2671   | 0.722150736 | 0.000784 | 0.005216 |
| 153    | 2.038855003 | 0.000788 | 0.005236 |
| 276    | 0.567974595 | 0.000788 | 0.005236 |
| 3704   | 0.703236484 | 0.00079  | 0.005244 |
| 2141   | 0.725464736 | 0.000791 | 0.005249 |
| 16     | 10.30926075 | 0.000794 | 0.005265 |
| 1351   | 1.51149738  | 0.000795 | 0.005269 |
| 2559   | 1.438352832 | 0.000797 | 0.005283 |
| 23546  | 1.407384565 | 0.0008   | 0.005295 |
| 3094   | 1.412452359 | 0.000802 | 0.005304 |
| 1410   | 1.499328001 | 0.000802 | 0.005304 |
| 25344  | 0.72832839  | 0.000803 | 0.005309 |
| 10     | 0.26254737  | 0.000807 | 0.005336 |
| 13413  | 1.362145191 | 0.000809 | 0.005346 |
| 19     | 0.314529936 | 0.000812 | 0.00536  |
| 2706   | 1.431904831 | 0.000812 | 0.005361 |
| 4496   | 0.716509864 | 0.000813 | 0.005368 |
| 3332   | 1.429774605 | 0.000816 | 0.005384 |
| 3912   | 1.415840013 | 0.000818 | 0.005391 |
| 1116   | 0.669869671 | 0.000821 | 0.005408 |
| 1672   | 0.688631464 | 0.000825 | 0.005433 |

|       |             |          |          |
|-------|-------------|----------|----------|
| 123   | 0.456722113 | 0.000826 | 0.005439 |
| 6081  | 1.35843144  | 0.000831 | 0.005465 |
| 1121  | 1.531647094 | 0.000831 | 0.005465 |
| 3460  | 0.718421181 | 0.000832 | 0.00547  |
| 1462  | 0.724535079 | 0.000834 | 0.005479 |
| 1747  | 0.730888563 | 0.000837 | 0.005497 |
| 76814 | 1.370800601 | 0.000838 | 0.0055   |
| 1319  | 1.543576517 | 0.00084  | 0.005509 |
| 3884  | 1.419208123 | 0.000842 | 0.005519 |
| 1774  | 0.683288274 | 0.000845 | 0.005537 |
| 8850  | 1.387123782 | 0.000845 | 0.005539 |
| 18610 | 1.318532945 | 0.00085  | 0.005567 |
| 2943  | 0.705049326 | 0.000859 | 0.005624 |
| 51895 | 1.366726711 | 0.000859 | 0.005624 |
| 10241 | 0.743372643 | 0.000861 | 0.005634 |
| 7380  | 1.369058871 | 0.000862 | 0.005638 |
| 683   | 1.57373917  | 0.000871 | 0.005688 |
| 476   | 0.580764267 | 0.000873 | 0.005701 |
| 5553  | 0.733934918 | 0.000876 | 0.005717 |
| 286   | 1.864657179 | 0.000878 | 0.00573  |
| 3983  | 1.303922592 | 0.000881 | 0.005745 |
| 20438 | 1.340235024 | 0.000882 | 0.005747 |
| 2974  | 1.343788026 | 0.000883 | 0.005751 |
| 7774  | 1.307716575 | 0.000887 | 0.005774 |
| 8     | 0.358078978 | 0.000888 | 0.005783 |
| 20271 | 0.719756922 | 0.000895 | 0.005823 |
| 1126  | 0.694972435 | 0.0009   | 0.005852 |
| 7749  | 1.380793998 | 0.000901 | 0.005855 |
| 93646 | 0.740132877 | 0.000912 | 0.005928 |
| 5100  | 0.728155623 | 0.000914 | 0.005935 |
| 2334  | 1.434736193 | 0.000915 | 0.005939 |
| 4818  | 1.373417905 | 0.000915 | 0.005939 |
| 27    | 0.390071232 | 0.000917 | 0.00595  |
| 9668  | 1.317062337 | 0.000926 | 0.006    |
| 5174  | 1.381906342 | 0.000928 | 0.00601  |
| 378   | 1.754829153 | 0.000932 | 0.006039 |
| 593   | 0.625150189 | 0.000933 | 0.006039 |
| 2307  | 1.487797327 | 0.000936 | 0.006055 |
| 3488  | 1.372118404 | 0.000938 | 0.006065 |
| 648   | 1.805966199 | 0.000947 | 0.006125 |
| 67069 | 0.767584289 | 0.000954 | 0.006166 |
| 3172  | 0.721948268 | 0.000955 | 0.00617  |
| 43404 | 1.355455085 | 0.00096  | 0.0062   |
| 23737 | 0.737458078 | 0.000963 | 0.006213 |
| 3908  | 1.361057418 | 0.000964 | 0.006215 |
| 46958 | 0.731295337 | 0.000964 | 0.006215 |
| 446   | 1.303600174 | 0.000964 | 0.006215 |
| 1033  | 1.489906705 | 0.000968 | 0.006235 |
| 4840  | 0.73291632  | 0.000969 | 0.006239 |
| 949   | 0.698218579 | 0.000972 | 0.006255 |
| 2088  | 1.419455483 | 0.000974 | 0.006264 |
| 10294 | 1.320707439 | 0.000987 | 0.006348 |



|       |             |          |          |
|-------|-------------|----------|----------|
| 3507  | 0.715035164 | 0.000988 | 0.00635  |
| 374   | 0.72469717  | 0.000992 | 0.006373 |
| 1062  | 0.719196468 | 0.000993 | 0.006378 |
| 1726  | 1.457799453 | 0.000996 | 0.006392 |
| 3199  | 0.693399465 | 0.000999 | 0.00641  |
| 1468  | 0.64339722  | 0.001002 | 0.006426 |
| 582   | 0.652574836 | 0.001003 | 0.006429 |
| 1862  | 0.716058483 | 0.001008 | 0.006454 |
| 37254 | 1.332638086 | 0.001013 | 0.006484 |
| 451   | 1.779096508 | 0.001014 | 0.006488 |
| 1964  | 1.527794127 | 0.001015 | 0.00649  |
| 6070  | 1.342715507 | 0.001016 | 0.006494 |
| 1931  | 1.446629225 | 0.001017 | 0.006497 |
| 3442  | 1.430874862 | 0.001027 | 0.006558 |
| 7845  | 1.365766441 | 0.001028 | 0.006564 |
| 1211  | 1.503031395 | 0.00103  | 0.006571 |
| 164   | 0.661582835 | 0.001031 | 0.00658  |
| 8038  | 0.745071598 | 0.001035 | 0.006602 |
| 649   | 0.678904748 | 0.001037 | 0.006606 |
| 6566  | 1.425732122 | 0.001043 | 0.006648 |
| 7199  | 1.388153722 | 0.00105  | 0.006688 |
| 5297  | 0.751787703 | 0.001051 | 0.006688 |
| 25401 | 0.71967749  | 0.001052 | 0.006692 |
| 63619 | 1.306915805 | 0.001053 | 0.006699 |
| 1280  | 0.696018364 | 0.001054 | 0.006701 |
| 5896  | 1.296871366 | 0.001055 | 0.006703 |
| 1698  | 1.53397699  | 0.001057 | 0.006714 |
| 5321  | 1.369130336 | 0.001059 | 0.006724 |
| 11972 | 1.387215485 | 0.001061 | 0.006734 |
| 2129  | 0.691565689 | 0.001068 | 0.006776 |
| 3022  | 1.418211663 | 0.001073 | 0.006801 |
| 1856  | 1.467179001 | 0.001073 | 0.006801 |
| 10101 | 0.732563516 | 0.001079 | 0.006835 |
| 567   | 0.71906151  | 0.001081 | 0.006843 |
| 2792  | 1.455155897 | 0.001081 | 0.006843 |
| 1827  | 1.436901652 | 0.001084 | 0.00685  |
| 169   | 2.206404731 | 0.001083 | 0.00685  |
| 4329  | 0.669171394 | 0.001084 | 0.00685  |
| 5293  | 0.74861889  | 0.001092 | 0.006897 |
| 1242  | 1.457116192 | 0.001097 | 0.006926 |
| 6153  | 1.406354794 | 0.001101 | 0.006949 |
| 75345 | 1.346750578 | 0.001106 | 0.006978 |
| 1528  | 0.678055142 | 0.001109 | 0.00699  |
| 5544  | 0.727378459 | 0.00111  | 0.006997 |
| 9863  | 0.729596289 | 0.001113 | 0.007009 |
| 7186  | 0.721258748 | 0.001117 | 0.007029 |
| 19494 | 1.388535345 | 0.001117 | 0.007029 |
| 5760  | 1.373587186 | 0.001117 | 0.007029 |
| 1147  | 1.505938367 | 0.001118 | 0.00703  |
| 1914  | 1.466051898 | 0.001119 | 0.00703  |
| 803   | 1.646467084 | 0.001119 | 0.00703  |
| 7952  | 1.414650263 | 0.001122 | 0.007039 |

|        |             |          |          |
|--------|-------------|----------|----------|
| 2622   | 0.708952176 | 0.001121 | 0.007039 |
| 18480  | 1.346634555 | 0.001122 | 0.007039 |
| 3134   | 0.725845195 | 0.001123 | 0.007041 |
| 4146   | 0.756718555 | 0.001126 | 0.007055 |
| 3929   | 1.353200061 | 0.001126 | 0.007055 |
| 52     | 3.570705511 | 0.001126 | 0.007055 |
| 3343   | 1.469870818 | 0.001128 | 0.007059 |
| 2667   | 0.710483296 | 0.00113  | 0.007069 |
| 3619   | 0.721705001 | 0.00113  | 0.007069 |
| 264    | 0.542762923 | 0.001133 | 0.007085 |
| 5778   | 1.390095595 | 0.001134 | 0.007087 |
| 2636   | 0.732293367 | 0.001135 | 0.007088 |
| 10180  | 1.386527032 | 0.001139 | 0.007105 |
| 2278   | 1.404550371 | 0.001139 | 0.007105 |
| 17620  | 1.354122769 | 0.001138 | 0.007105 |
| 453    | 1.768149478 | 0.00115  | 0.00717  |
| 6806   | 1.372930868 | 0.001158 | 0.007216 |
| 75981  | 1.400564674 | 0.001159 | 0.007218 |
| 1580   | 1.490691965 | 0.00116  | 0.007225 |
| 1141   | 1.490666802 | 0.001165 | 0.007254 |
| 516    | 1.539432812 | 0.001171 | 0.007288 |
| 7371   | 1.375930133 | 0.001174 | 0.007298 |
| 194    | 1.740536449 | 0.001176 | 0.00731  |
| 1325   | 0.731031227 | 0.001177 | 0.007312 |
| 1269   | 1.5580461   | 0.001177 | 0.007312 |
| 6365   | 1.410938933 | 0.00118  | 0.007325 |
| 11233  | 1.36770579  | 0.001182 | 0.007333 |
| 6857   | 0.757738995 | 0.00119  | 0.007378 |
| 3627   | 1.351984895 | 0.001194 | 0.007397 |
| 4253   | 1.381038221 | 0.001193 | 0.007397 |
| 76042  | 1.399433337 | 0.001196 | 0.007406 |
| 612    | 0.582345583 | 0.001201 | 0.007434 |
| 3422   | 1.41813175  | 0.001208 | 0.007478 |
| 3680   | 0.719202886 | 0.001211 | 0.00749  |
| 5657   | 0.756576027 | 0.001214 | 0.0075   |
| 335    | 1.891845025 | 0.001213 | 0.0075   |
| 3292   | 1.373957561 | 0.001215 | 0.007506 |
| 3013   | 0.725119835 | 0.001219 | 0.007523 |
| 153    | 2.452191015 | 0.00122  | 0.007523 |
| 14781  | 0.725240272 | 0.001219 | 0.007523 |
| 545    | 0.657307293 | 0.00122  | 0.007523 |
| 3696   | 1.349963788 | 0.001221 | 0.007526 |
| 499    | 0.6741133   | 0.001222 | 0.007528 |
| 1556   | 1.443461965 | 0.001226 | 0.007547 |
| 7339   | 0.676009132 | 0.001229 | 0.007559 |
| 20806  | 1.341628936 | 0.001228 | 0.007559 |
| 138431 | 0.726061585 | 0.001229 | 0.007559 |
| 6009   | 1.380054307 | 0.001236 | 0.007589 |
| 1717   | 0.677408768 | 0.001235 | 0.007589 |
| 1033   | 1.51641992  | 0.001236 | 0.007589 |
| 8529   | 1.357037545 | 0.001236 | 0.007589 |
| 672    | 1.721390428 | 0.001237 | 0.00759  |

|       |             |          |          |
|-------|-------------|----------|----------|
| 3884  | 1.355318637 | 0.001242 | 0.007618 |
| 4228  | 0.74344791  | 0.001246 | 0.007637 |
| 2859  | 0.643219012 | 0.001247 | 0.007641 |
| 15149 | 1.327100124 | 0.001252 | 0.007673 |
| 88    | 0.467217618 | 0.001256 | 0.00769  |
| 390   | 0.601486155 | 0.001261 | 0.00772  |
| 1134  | 1.678675212 | 0.001265 | 0.007737 |
| 950   | 1.568060841 | 0.001266 | 0.007743 |
| 8064  | 0.778117035 | 0.001267 | 0.007745 |
| 6083  | 0.732564669 | 0.001268 | 0.00775  |
| 1935  | 0.714645734 | 0.001274 | 0.007778 |
| 3350  | 1.376274079 | 0.001275 | 0.00778  |
| 3609  | 1.395829541 | 0.001275 | 0.00778  |
| 1944  | 1.442330856 | 0.001278 | 0.007795 |
| 8907  | 1.365680459 | 0.001279 | 0.0078   |
| 197   | 0.563603969 | 0.001284 | 0.007826 |
| 19868 | 1.32927944  | 0.001287 | 0.00784  |
| 14344 | 1.363954379 | 0.00129  | 0.007853 |
| 8143  | 0.744094886 | 0.00129  | 0.007853 |
| 3084  | 0.743750644 | 0.001292 | 0.007858 |
| 2534  | 0.73232015  | 0.001298 | 0.007891 |
| 7085  | 1.347538547 | 0.001306 | 0.007937 |
| 155   | 2.352058655 | 0.001317 | 0.008004 |
| 1777  | 0.681848825 | 0.001323 | 0.008032 |
| 5349  | 0.729157107 | 0.001324 | 0.00804  |
| 492   | 1.497710405 | 0.00133  | 0.008073 |
| 3128  | 1.412971799 | 0.001335 | 0.0081   |
| 4644  | 0.737950617 | 0.00134  | 0.008125 |
| 366   | 0.623616063 | 0.001343 | 0.00814  |
| 1372  | 0.726215003 | 0.001345 | 0.00815  |
| 4169  | 1.408463984 | 0.001351 | 0.008179 |
| 46640 | 0.722219588 | 0.001357 | 0.008214 |
| 22710 | 1.368354424 | 0.001359 | 0.008223 |
| 2414  | 0.67939931  | 0.001369 | 0.008275 |
| 928   | 0.69276086  | 0.001372 | 0.008291 |
| 32928 | 1.343561552 | 0.001375 | 0.008309 |
| 3019  | 0.734991406 | 0.00138  | 0.008337 |
| 9618  | 0.726428402 | 0.001385 | 0.008362 |
| 10790 | 1.312612605 | 0.001387 | 0.008367 |
| 15748 | 1.347539765 | 0.00139  | 0.008385 |
| 9688  | 0.767701328 | 0.001394 | 0.008404 |
| 12589 | 0.705937005 | 0.001396 | 0.008411 |
| 2806  | 0.726588994 | 0.001399 | 0.008425 |
| 10489 | 1.362720885 | 0.001401 | 0.008431 |
| 1169  | 1.384307675 | 0.001401 | 0.008431 |
| 58999 | 1.38974569  | 0.001404 | 0.008446 |
| 16282 | 0.755013586 | 0.001405 | 0.008449 |
| 17514 | 0.713546336 | 0.00141  | 0.008474 |
| 2852  | 1.430619729 | 0.001413 | 0.008491 |
| 2480  | 1.412935241 | 0.001416 | 0.008501 |
| 16375 | 0.728487275 | 0.001423 | 0.008545 |
| 1250  | 0.708168451 | 0.001427 | 0.008561 |

|       |             |          |          |
|-------|-------------|----------|----------|
| 1282  | 0.711182845 | 0.001429 | 0.008568 |
| 454   | 1.665135729 | 0.001435 | 0.008601 |
| 5126  | 1.372312762 | 0.001437 | 0.008609 |
| 1105  | 1.45139718  | 0.001444 | 0.008647 |
| 8782  | 0.751993933 | 0.001447 | 0.008665 |
| 3242  | 1.389898498 | 0.001456 | 0.008717 |
| 225   | 0.523401005 | 0.001459 | 0.008731 |
| 2440  | 0.730426614 | 0.00146  | 0.008732 |
| 2845  | 0.761983326 | 0.001465 | 0.008758 |
| 1212  | 0.711127492 | 0.001479 | 0.008834 |
| 1106  | 0.621814259 | 0.001479 | 0.008834 |
| 25841 | 0.710551921 | 0.001489 | 0.008888 |
| 63    | 3.04282052  | 0.001499 | 0.008947 |
| 2397  | 0.72925204  | 0.0015   | 0.008948 |
| 8937  | 0.709608469 | 0.001502 | 0.008957 |
| 25808 | 0.772289487 | 0.001505 | 0.008966 |
| 6847  | 0.750088164 | 0.001517 | 0.009035 |
| 1824  | 1.377744313 | 0.001518 | 0.009041 |
| 6289  | 1.357453942 | 0.001522 | 0.00906  |
| 725   | 0.650759821 | 0.001524 | 0.009066 |
| 6486  | 0.745537661 | 0.001527 | 0.009076 |
| 12770 | 0.766559768 | 0.001527 | 0.009076 |
| 8783  | 0.747845058 | 0.001529 | 0.009083 |
| 4926  | 1.353542526 | 0.001535 | 0.009117 |
| 964   | 0.630410906 | 0.001538 | 0.009129 |
| 7098  | 1.431038574 | 0.001538 | 0.009129 |
| 18096 | 1.383623629 | 0.001544 | 0.00916  |
| 1905  | 0.723849505 | 0.001561 | 0.009258 |
| 3375  | 0.729239408 | 0.001564 | 0.009267 |
| 3545  | 1.44134786  | 0.001567 | 0.009283 |
| 7254  | 1.351534277 | 0.001571 | 0.009306 |
| 35818 | 1.307944504 | 0.001575 | 0.009322 |
| 2761  | 1.389346238 | 0.001577 | 0.009328 |
| 1415  | 1.428998149 | 0.001577 | 0.009328 |
| 4045  | 0.763453039 | 0.001584 | 0.009365 |
| 355   | 1.802764044 | 0.001585 | 0.009366 |
| 7160  | 0.756487567 | 0.001588 | 0.009383 |
| 6336  | 1.342016064 | 0.001605 | 0.009472 |
| 1360  | 0.655510871 | 0.001606 | 0.009472 |
| 30891 | 0.733235935 | 0.001605 | 0.009472 |
| 8669  | 0.727400427 | 0.001609 | 0.009486 |
| 44655 | 0.733483615 | 0.001609 | 0.009486 |
| 7846  | 1.392579769 | 0.001613 | 0.009503 |
| 3129  | 1.386769129 | 0.001621 | 0.009547 |
| 729   | 0.671573361 | 0.001624 | 0.009561 |
| 257   | 1.54233411  | 0.001627 | 0.009572 |
| 280   | 0.632552532 | 0.001628 | 0.009579 |
| 789   | 0.663574774 | 0.00163  | 0.009585 |
| 2193  | 1.511758199 | 0.001633 | 0.009599 |
| 13069 | 1.334681183 | 0.001636 | 0.00961  |
| 42441 | 0.736347171 | 0.001649 | 0.009681 |
| 498   | 0.710364883 | 0.001651 | 0.009691 |

|        |             |          |          |
|--------|-------------|----------|----------|
| 501    | 0.590959318 | 0.001653 | 0.009697 |
| 4499   | 1.19462407  | 0.001657 | 0.009717 |
| 14339  | 0.697360946 | 0.001662 | 0.009746 |
| 2886   | 0.692981127 | 0.001664 | 0.009752 |
| 3609   | 1.398116562 | 0.001681 | 0.009845 |
| 1196   | 1.497588147 | 0.001692 | 0.009903 |
| 2051   | 1.443410256 | 0.001692 | 0.009903 |
| 3400   | 1.374225134 | 0.001699 | 0.00994  |
| 100064 | 0.757926163 | 0.001704 | 0.009959 |
| 7890   | 1.366150855 | 0.001703 | 0.009959 |
| 301    | 1.783445215 | 0.001711 | 0.009991 |
| 299    | 1.729496031 | 0.001711 | 0.009991 |
| 7340   | 0.767784245 | 0.001711 | 0.009992 |
| 1363   | 1.425965528 | 0.001717 | 0.009994 |
| 1307   | 1.473340129 | 0.001723 | 0.009995 |
| 3813   | 1.389211235 | 0.001729 | 0.009996 |

| Row.names           | Ethanol-1 | Ethanol-2 | Ethanol-3 | VD-1   |
|---------------------|-----------|-----------|-----------|--------|
| chr20:klf11a        | 2901      | 2929      | 3641      | 29800  |
| chr6:cyp24a1        | 46543     | 37575     | 32535     | 232181 |
| chr17:klf11b        | 1236      | 1550      | 2116      | 7249   |
| chr2:igfbp1b        | 49620     | 43557     | 53242     | 175590 |
| chr1:c3b            | 10541     | 11441     | 13215     | 3027   |
| chr24:si-ch211-234  | 8327      | 7644      | 8965      | 2400   |
| chr1:zgc-154142     | 18856     | 15218     | 17520     | 6021   |
| chr15:elna          | 961       | 1022      | 1919      | 3384   |
| chr16:zgc-92590     | 6277      | 4938      | 3980      | 1854   |
| chr20:LOC798872     | 5284      | 4082      | 6893      | 12542  |
| chr10:si-ch73-46j1f | 3010      | 2990      | 3635      | 8150   |
| chr15:LOC1000029    | 4347      | 4058      | 5446      | 1788   |
| chr18:tat           | 34241     | 34896     | 41289     | 99608  |
| chr6:opn1mw1        | 19783     | 26269     | 51407     | 12141  |
| chr6:aldh1l1        | 19066     | 17382     | 19090     | 7881   |
| chr8:fabp1b.1       | 4599      | 3902      | 6459      | 2024   |
| chr12:habp2         | 2903      | 2505      | 2976      | 1011   |
| chr15:a2ml          | 26363     | 23110     | 23288     | 11944  |
| chr5:zgc-114041     | 603       | 541       | 509       | 1536   |
| chr22:fbn2b         | 6561      | 6744      | 10509     | 16508  |
| chr1:f7i            | 1158      | 980       | 1569      | 330    |
| chr14:stc2          | 3076      | 2721      | 3015      | 1062   |
| chr22:ahsg          | 7010      | 4637      | 5813      | 2716   |
| chr16:zgc-161979    | 20069     | 21626     | 28110     | 11632  |
| chr18:ces3          | 4324      | 3606      | 3929      | 1551   |
| chr13:rn7sk         | 383       | 352       | 376       | 1474   |
| chr12:slc16a12b     | 8485      | 7739      | 8615      | 19205  |
| chr4:slc26a3        | 38        | 149       | 73        | 375    |
| chr19:zgc-112992    | 777       | 706       | 1011      | 254    |
| chr12:ankrd1b       | 13227     | 12880     | 13549     | 6798   |
| chr13:mycl1a        | 1207      | 1277      | 1840      | 3226   |
| chr1:fabp2          | 42645     | 38811     | 40321     | 21658  |
| chr2:cyp7a1a        | 17394     | 14024     | 14135     | 7432   |
| chr24:ezh2          | 1062      | 1171      | 1386      | 2994   |
| chr11:opn1sw2       | 30185     | 32299     | 53848     | 18438  |
| chr20:igfbp1a       | 29853     | 27781     | 43443     | 63785  |
| chr6:hmg1b          | 3988      | 3951      | 4527      | 8851   |
| chr14:zgc-154020    | 2419      | 11479     | 34080     | 6045   |
| chr9:ugt1a5         | 6816      | 5656      | 6128      | 3097   |
| chr20:cyp2ad2       | 8592      | 6963      | 7319      | 4322   |
| chr14:masel3        | 1397      | 1710      | 1116      | 631    |
| chr25:klf13         | 3109      | 2742      | 2797      | 6638   |
| chr9:ugt1a1         | 11279     | 9221      | 10151     | 5390   |
| chr4:adm2           | 706       | 731       | 791       | 1992   |
| chr13:hells         | 766       | 697       | 897       | 2103   |
| chr9:ugt1a2         | 6664      | 5489      | 6049      | 3109   |
| chr4:opn1sw1        | 140166    | 160829    | 216181    | 84326  |
| chr9:ugt1a7         | 7447      | 6320      | 6934      | 3593   |
| chr6:zgc-113054     | 2125      | 2212      | 2679      | 5025   |
| chr9:ugt1a6         | 6483      | 5327      | 5796      | 3012   |

|                     |        |        |        |        |
|---------------------|--------|--------|--------|--------|
| chr17:col10a1       | 3771   | 5899   | 8420   | 5328   |
| chr16:dpys          | 4136   | 3656   | 4587   | 1953   |
| chr13:slc1a4        | 1910   | 1610   | 1864   | 3629   |
| chr6:cish           | 14296  | 11955  | 12019  | 7712   |
| chr9:ugt1a4         | 7059   | 5808   | 6288   | 3432   |
| chr8:si-dkey-45m5.  | 465    | 500    | 812    | 1275   |
| chr22:lpl           | 56232  | 52287  | 58503  | 28400  |
| chr2:ebi3           | 661    | 701    | 1126   | 278    |
| chr8:rh50           | 1937   | 1548   | 1849   | 982    |
| chr9:ugt1ab         | 9186   | 7413   | 7830   | 4382   |
| chr20:cx32.3        | 5837   | 5658   | 5519   | 3281   |
| chr12:gip           | 723722 | 676680 | 838165 | 405916 |
| chr14:and4          | 1438   | 2012   | 3367   | 2878   |
| chr20:serpina1      | 26410  | 24045  | 29584  | 15819  |
| chr17:dnmt6         | 5916   | 5770   | 6977   | 11596  |
| chr18:si-dkey-24111 | 5717   | 5498   | 6251   | 3102   |
| chr3:socs1          | 3698   | 3437   | 4116   | 2176   |
| chr15:pmepa1        | 141702 | 135094 | 189483 | 81957  |
| chr2:tfa            | 90669  | 90855  | 105323 | 55477  |
| chr1:cyp4v2         | 7791   | 6655   | 6052   | 4349   |
| chr11:vgll4         | 200214 | 191495 | 253561 | 115647 |
| chr1:zgc-136854     | 38     | 154    | 384    | 139    |
| chr11:zgc-110377    | 5536   | 5019   | 4110   | 3325   |
| chr19:zgc-110064    | 17751  | 17594  | 21370  | 12724  |
| chr11:socs8         | 1816   | 1830   | 1815   | 899    |
| chr6:pglyrp2        | 541    | 641    | 686    | 234    |
| chr2:zgc-92406      | 1905   | 1586   | 1593   | 876    |
| chr3:mcm5           | 3654   | 3541   | 5720   | 8066   |
| chr1:si-dkey-22i16. | 494    | 642    | 894    | 825    |
| chr2:itgb1bp3       | 12071  | 9324   | 9595   | 7573   |
| chr7:agxt2l1        | 6808   | 5749   | 5884   | 3807   |
| chr23:rybpa         | 3623   | 3510   | 4699   | 7038   |
| chr2:sepp1b         | 6085   | 5094   | 3975   | 11069  |
| chr1:c3c            | 20239  | 18961  | 16424  | 11838  |
| chr13:pygl          | 8217   | 6875   | 7570   | 4907   |
| chr1:slc43a1b       | 5122   | 5180   | 5307   | 3041   |
| chr10:zgc-114201    | 6389   | 9220   | 10134  | 4265   |
| chr14:LOC564844     | 1317   | 1207   | 1590   | 728    |
| chr22:rdh5          | 5151   | 5334   | 5157   | 3845   |
| chr17:foxo3a        | 45265  | 42285  | 47091  | 26055  |
| chr6:si-dkey-91f15. | 627    | 886    | 1349   | 364    |
| chr4:si-ch211-24011 | 1410   | 1077   | 1114   | 2606   |
| chr19:cyt1l         | 190186 | 176049 | 204614 | 112148 |
| chr7:zgc-172079     | 6918   | 6998   | 8342   | 4285   |
| chr9:zgc-110113     | 1430   | 1376   | 2140   | 3163   |
| chr24:si-dkey-25o1  | 2306   | 3063   | 3666   | 1960   |
| chr20:cx28.9        | 9271   | 8763   | 8649   | 5701   |
| chr2:slc2a2         | 7869   | 7346   | 8081   | 4996   |
| chr23:nmnat1        | 2367   | 1959   | 2388   | 4759   |
| chr4:pparaa         | 11785  | 10927  | 13879  | 6548   |
| chr19:fkbp9         | 1091   | 1022   | 1401   | 2233   |

|                    |        |        |        |        |
|--------------------|--------|--------|--------|--------|
| chr11:il34         | 7      | 47     | 93     | 17     |
| chr3:bcata2        | 15660  | 16386  | 16471  | 10457  |
| chr1:slc34a2a      | 13942  | 15078  | 16458  | 8516   |
| chr6:pltp          | 10055  | 9025   | 8115   | 17051  |
| chr1:LOC10000563   | 4330   | 3781   | 4252   | 2399   |
| chr15:zgc-165502   | 4743   | 4148   | 6096   | 2884   |
| chr6:mcm6          | 3603   | 3983   | 6462   | 8245   |
| chr5:pdzd3b        | 2457   | 2087   | 2678   | 1325   |
| chr6:igfbp2a       | 6518   | 6200   | 7538   | 4324   |
| chr12:aqp8a.2      | 6104   | 5465   | 6430   | 3877   |
| chr1:smc2          | 1308   | 1348   | 2423   | 3055   |
| chr11:zgc-153102   | 2528   | 2357   | 2295   | 3928   |
| chr3:zgc-172253    | 2916   | 2590   | 2860   | 1827   |
| chr13:abcg8        | 2320   | 2514   | 3260   | 1510   |
| chr23:hmga1a       | 44873  | 46375  | 63569  | 82471  |
| chr21:ghrb         | 13410  | 14689  | 12941  | 9186   |
| Zv9_NA237:mcm2     | 4368   | 4511   | 6643   | 8834   |
| chr24:abp1         | 15731  | 13982  | 15270  | 10786  |
| chr7:zgc-171537    | 1267   | 1046   | 1299   | 638    |
| chr2:zgc-153913    | 2308   | 2044   | 2555   | 1493   |
| chr24:mcm4         | 8298   | 8041   | 13200  | 15810  |
| chr6:LOC564868     | 6412   | 6164   | 6023   | 10353  |
| chr13:agt          | 14718  | 13606  | 10270  | 25035  |
| chr20:mep1b        | 8156   | 7303   | 8247   | 4919   |
| chr17:lpin1        | 140448 | 132555 | 140390 | 90456  |
| chr19:rrm2         | 698    | 774    | 922    | 1671   |
| chr11:opn1lw2      | 14179  | 17323  | 27736  | 14113  |
| chr3:gcat          | 7578   | 7862   | 8347   | 5481   |
| chr19:pkhd1l1      | 7290   | 8617   | 13243  | 13865  |
| chr16:si-ch211-154 | 1404   | 1243   | 1600   | 2242   |
| chr10:foxo1b       | 1175   | 983    | 1126   | 2084   |
| chr18:dut          | 1787   | 1566   | 2433   | 3588   |
| chr12:top2a        | 1635   | 1577   | 2375   | 3303   |
| chr1:abcg2b        | 2258   | 1687   | 2059   | 1253   |
| chr2:bcl6ab        | 3751   | 3741   | 4329   | 6405   |
| chr1:mtp           | 10086  | 9380   | 11136  | 6356   |
| chr8:gmat2         | 52419  | 53425  | 63287  | 37516  |
| chr19:si-dkeyp-113 | 248091 | 197113 | 200675 | 161697 |
| chr4:pfkfb3        | 15320  | 14120  | 11760  | 25932  |
| chr20:LOC796447    | 12417  | 9001   | 12143  | 21668  |
| chr22:zgc-110409   | 16966  | 15112  | 18493  | 9373   |
| chr24:hgd          | 29060  | 24652  | 28669  | 17314  |
| chr23:slc34a2b     | 5840   | 4912   | 6518   | 7841   |
| chr5:fbp1a         | 13554  | 12204  | 12856  | 8722   |
| chr16:hamp1        | 723    | 811    | 580    | 1829   |
| chr7:LOC570613     | 2558   | 2242   | 2459   | 1609   |
| chr20:zgc-158463   | 176    | 268    | 487    | 100    |
| chr22:chaf1a       | 2701   | 2928   | 4326   | 5753   |
| chr15:cyp2y3       | 12275  | 9962   | 10267  | 7281   |
| chr2:LOC10000364   | 658    | 2614   | 898    | 1435   |
| chr22:cfhl2        | 409    | 444    | 609    | 140    |



|                             |        |        |        |       |
|-----------------------------|--------|--------|--------|-------|
| chr5:zgc-112282             | 5301   | 4853   | 4567   | 3765  |
| Zv9_NA889:zgc-19            | 271    | 458    | 919    | 173   |
| chr6:zgc-103559             | 1643   | 1480   | 1806   | 897   |
| chr8:hpd                    | 27027  | 25833  | 28053  | 14792 |
| chr8:upb1                   | 2973   | 2939   | 2843   | 1873  |
| chr25:zgc-101540            | 4935   | 4602   | 4103   | 3613  |
| Zv9_NA889:rt                | 244    | 427    | 887    | 166   |
| chr17:zgc-194887            | 1000   | 703    | 1244   | 547   |
| Zv9_scaffold3460:zgc-194887 | 1283   | 1397   | 1549   | 798   |
| chr25:cyp2x9                | 2607   | 2363   | 2340   | 1624  |
| chr9:vil1l                  | 30126  | 26318  | 33025  | 19592 |
| chr10:zgc-136807            | 1330   | 1191   | 1355   | 2444  |
| chr2:rpb2b                  | 1343   | 1289   | 1226   | 1055  |
| chr3:ezh1                   | 9556   | 8778   | 9937   | 6485  |
| chr1:ugt5b3                 | 1737   | 1695   | 1719   | 977   |
| chr10:fhl                   | 1250   | 968    | 1262   | 2347  |
| chr20:mycn                  | 10971  | 10089  | 12475  | 18203 |
| chr16:fabp10a               | 118192 | 102231 | 100019 | 81059 |
| chr19:fabp11a               | 686    | 685    | 1026   | 1270  |
| chr9:col18a1                | 11995  | 12980  | 20620  | 20426 |
| chr18:si-dkeyp-1h4          | 205    | 283    | 343    | 498   |
| chr16:col27a1a              | 1740   | 1869   | 2908   | 3094  |
| chr20:zgc-153896            | 2374   | 2269   | 2499   | 1286  |
| chr9:fam46c                 | 7671   | 6512   | 6851   | 5863  |
| chr25:igf2b                 | 5949   | 5430   | 5245   | 9711  |
| chr3:cyp3c1l2               | 4067   | 3727   | 2819   | 2457  |
| chr7:tm4sf5                 | 3322   | 3094   | 3370   | 2180  |
| chr7:tyms                   | 410    | 514    | 669    | 958   |
| chr24:pck2                  | 27512  | 25631  | 27458  | 18930 |
| chr16:pklr                  | 103850 | 79772  | 124047 | 62712 |
| chr12:sult2st1              | 1271   | 1255   | 1092   | 2662  |
| chr5:zgc-175280             | 15211  | 15342  | 17935  | 10340 |
| chr19:stmn1a                | 1399   | 1308   | 1511   | 2919  |
| chr4:lta4h                  | 11073  | 10007  | 10356  | 7381  |
| chr9:cbsb                   | 21227  | 20440  | 21179  | 14343 |
| chr13:plek2                 | 861    | 733    | 672    | 1452  |
| chr21:zgc-66125             | 1148   | 1092   | 1939   | 2403  |
| chr7:zgc-162651             | 3172   | 3054   | 3722   | 5259  |
| chr7:frem1a                 | 4913   | 5044   | 6751   | 7904  |
| chr1:ugdh                   | 2995   | 2913   | 3624   | 2297  |
| chr1:zgc-136353             | 2078   | 1855   | 2063   | 1317  |
| chr6:gadd45ab               | 6469   | 6462   | 9080   | 4503  |
| chr9:stk24a                 | 1925   | 1728   | 1749   | 1195  |
| chr19:crabp2b               | 1679   | 1817   | 2060   | 2805  |
| chr5:gc                     | 21236  | 19515  | 19407  | 17001 |
| chr25:rlbp1b                | 16260  | 16101  | 15515  | 12941 |
| chr3:gh1                    | 2582   | 3284   | 2200   | 2010  |
| chr15:tmem195               | 7951   | 7299   | 9293   | 5278  |
| chr10:stc1l                 | 3837   | 5212   | 5048   | 2652  |
| chr23:agmat                 | 2801   | 2454   | 3362   | 1818  |
| chr19:snx10a                | 319    | 262    | 378    | 641   |

|                     |        |        |        |        |
|---------------------|--------|--------|--------|--------|
| chr8:unc45b         | 3466   | 3101   | 3697   | 2282   |
| chr3:dlx4a          | 1334   | 1207   | 1450   | 2068   |
| chr14:zgc-174917    | 360    | 2559   | 2402   | 1849   |
| chr1:slc34a2aas     | 5560   | 5690   | 7198   | 4069   |
| chr8:LOC567547      | 3345   | 3186   | 3338   | 5375   |
| chr14:zgc-77938     | 4125   | 3593   | 4423   | 2667   |
| chr16:zgc-92763     | 2590   | 2663   | 2713   | 1997   |
| chr12:pts           | 8891   | 8166   | 12363  | 6123   |
| chr24:elovl2        | 1434   | 1073   | 1472   | 623    |
| chr18:gnb5b         | 6549   | 7184   | 9401   | 5359   |
| chr3:cyp3c4         | 1297   | 1204   | 1091   | 788    |
| chr15:smc4          | 2299   | 2300   | 4006   | 4325   |
| chr19:gnb3b         | 42608  | 44376  | 62280  | 30862  |
| chr20:zgc-171525    | 8798   | 7966   | 12714  | 6128   |
| chr6:zgc-73056      | 6717   | 7283   | 10038  | 5584   |
| chr11:mybl2         | 660    | 673    | 863    | 1437   |
| chr8:slc5a9         | 1265   | 1392   | 1673   | 801    |
| Zv9_scaffold3548:c  | 2444   | 2581   | 2871   | 1623   |
| chr22:cfhl1         | 242    | 298    | 338    | 100    |
| chr19:zgc-162356    | 15060  | 14237  | 14068  | 11565  |
| chr22:LOC1000067    | 2616   | 2909   | 2399   | 1816   |
| chr13:zgc-112210    | 547    | 507    | 572    | 304    |
| chr5:pole           | 1037   | 1029   | 1546   | 2233   |
| chr21:dck           | 254    | 290    | 536    | 601    |
| chr24:acaa1         | 2727   | 2917   | 3480   | 2121   |
| chr17:kif11         | 1283   | 1228   | 1854   | 2574   |
| chr24:si-ch211-234  | 1259   | 1315   | 929    | 710    |
| chr20:znf395b       | 26540  | 23401  | 33194  | 18014  |
| chr10:zgc-110200    | 7183   | 7549   | 8302   | 5457   |
| chr16:zgc-193613    | 186789 | 174862 | 198510 | 153579 |
| chr24:zgc-172225    | 1267   | 1335   | 931    | 717    |
| chr1:ugt5b4         | 1634   | 1564   | 1274   | 946    |
| chr13:arg2          | 94044  | 78883  | 73820  | 59870  |
| chr2:si-rp71-1g18.1 | 466    | 448    | 276    | 206    |
| chr20:mep1a.2       | 10437  | 9212   | 9833   | 7410   |
| chr22:hsd11b3a      | 3254   | 3555   | 3005   | 2334   |
| chr8:zgc-136909     | 1959   | 1652   | 2324   | 1181   |
| chr1:fgg            | 25331  | 24107  | 25207  | 20603  |
| chr2:si-dkeyp-35b8  | 1457   | 1497   | 2081   | 2599   |
| chr3:kpna2          | 1331   | 1537   | 2256   | 2635   |
| chr6:acox1          | 8516   | 9203   | 9765   | 6447   |
| chr16:hamp2         | 509    | 605    | 403    | 1292   |
| chr5:si-ch211-89p1  | 178    | 210    | 235    | 102    |
| chr8:amt            | 3952   | 3529   | 4353   | 2717   |
| chr24:cyb5a         | 4915   | 4842   | 6010   | 3890   |
| chr19:si-dkeyp-113  | 188952 | 179565 | 242967 | 363827 |
| chr1:cpb2           | 1231   | 1116   | 1154   | 796    |
| chr3:nme4           | 1002   | 893    | 827    | 1600   |
| chr8:dio1           | 4136   | 3666   | 3578   | 2900   |
| chr16:tmem176l.4    | 1347   | 2299   | 2593   | 1584   |
| chr16:mcm3          | 1549   | 1573   | 2207   | 3061   |

|                     |        |        |        |       |
|---------------------|--------|--------|--------|-------|
| chr8:ulk1a          | 6958   | 7048   | 7123   | 10854 |
| chr20:serpina1l     | 40492  | 27965  | 32734  | 27651 |
| chr25:dhtkd1        | 36158  | 34683  | 40156  | 25239 |
| chr1:fgb            | 23980  | 21864  | 22422  | 18283 |
| chr15:gdpd1         | 3193   | 3373   | 3213   | 2517  |
| chr2:LOC10000564    | 1136   | 1212   | 1465   | 841   |
| chr14:ccna2         | 539    | 651    | 927    | 1375  |
| chr12:rltgr         | 2287   | 2582   | 1828   | 1610  |
| chr24:and1          | 20917  | 24779  | 45683  | 28286 |
| chr2:mmp14b         | 6075   | 6858   | 7684   | 9042  |
| chr6:rgn            | 3374   | 3346   | 3547   | 2524  |
| chr5:zgc-64116      | 183    | 233    | 251    | 442   |
| chr8:comta          | 2139   | 1870   | 2376   | 1359  |
| chr25:lamb1a        | 10650  | 11099  | 16937  | 15910 |
| chr10:ugt5d1        | 712    | 628    | 628    | 437   |
| chr2:dpyd           | 22280  | 19990  | 24031  | 16712 |
| chr3:zgc-114180     | 3234   | 3327   | 4190   | 2613  |
| chr14:zgc-136890    | 3703   | 3595   | 3593   | 2854  |
| chr3:zgc-152911     | 607    | 1653   | 2262   | 1135  |
| chr20:sesn1         | 145459 | 140175 | 148292 | 91748 |
| chr15:bbc3          | 4919   | 4833   | 5560   | 7407  |
| chr14:aurkb         | 772    | 854    | 1336   | 1631  |
| chr16:gbp           | 17548  | 14599  | 19337  | 25505 |
| chr22:mfap2         | 1865   | 2059   | 3901   | 2954  |
| chr4:cd36           | 33400  | 27889  | 28444  | 23531 |
| chr25:pparab        | 1270   | 1038   | 1424   | 789   |
| chr1:zgc-152925     | 433    | 371    | 569    | 849   |
| chr4:si-dkey-14d8.7 | 2261   | 1972   | 2086   | 1312  |
| chr5:nos2a          | 60     | 283    | 833    | 74    |
| chr24:abcd3a        | 14459  | 12949  | 14352  | 10848 |
| chr15:nnr           | 4      | 0      | 0      | 1     |
| chr1:fga            | 27963  | 26208  | 23122  | 23788 |
| chr2:elovl1a        | 2031   | 1402   | 1356   | 3023  |
| chr7:zgc-153723     | 203    | 750    | 1335   | 331   |
| chr2:ncapd2         | 1689   | 1909   | 2743   | 3456  |
| chr3:ldlr           | 18877  | 16119  | 19954  | 12459 |
| chr5:noxa1          | 55     | 139    | 389    | 90    |
| chr1:sfrp2          | 2146   | 2256   | 2187   | 3576  |
| chr9:zgc-66484      | 3911   | 3051   | 3393   | 2768  |
| chr14:gabra6a       | 1526   | 1701   | 2498   | 1254  |
| chr21:zgc-136410    | 1422   | 1175   | 1232   | 948   |
| chr5:zgc-65851      | 11669  | 9807   | 14037  | 17959 |
| chr17:zgc-162909    | 584    | 575    | 721    | 1147  |
| chr5:zgc-92661      | 124    | 156    | 189    | 330   |
| chr5:aacs           | 3805   | 3649   | 3929   | 2897  |
| chr18:ch25hl1.1     | 1733   | 2057   | 2304   | 1340  |
| chr11:zgc-92474     | 9460   | 8624   | 11793  | 6784  |
| chr2:zgc-73230      | 9305   | 8252   | 9157   | 13017 |
| chr23:igfbp6b       | 1132   | 1079   | 1560   | 745   |
| chr10:cldn5b        | 1317   | 1402   | 1732   | 2183  |
| chr15:acad8         | 4268   | 4334   | 4655   | 3755  |

|                     |        |        |        |        |
|---------------------|--------|--------|--------|--------|
| chr6:etv5b          | 13980  | 13352  | 16101  | 21153  |
| chr23:pm20d1.1      | 8033   | 6782   | 6691   | 5742   |
| chr21:rrm1          | 4221   | 4644   | 6324   | 7751   |
| chr8:angptl7        | 3313   | 3293   | 4552   | 5316   |
| chr2:grk7a          | 31222  | 31561  | 35140  | 23836  |
| chr22:zgc-55418     | 10486  | 10742  | 11003  | 15009  |
| chr16:icn2          | 13957  | 11642  | 8184   | 12944  |
| chr2:fndc3ba        | 2832   | 2852   | 4381   | 4309   |
| chr3:zgc-100868     | 13060  | 20696  | 50829  | 20938  |
| chr8:sult1st2       | 1470   | 1219   | 1319   | 1021   |
| chr9:rdh1           | 10645  | 7610   | 9831   | 7728   |
| chr12:slc9a3r1      | 4768   | 4724   | 5421   | 3653   |
| chr24:ctdspla       | 18631  | 16002  | 17000  | 26674  |
| chr5:akr1a1a        | 393    | 304    | 350    | 215    |
| chr5:ubb            | 18578  | 19165  | 20263  | 30146  |
| chr19:tmem54        | 425    | 431    | 393    | 241    |
| chr18:chka          | 18973  | 17716  | 16353  | 14889  |
| chr1:f7             | 5083   | 3739   | 6178   | 3494   |
| chr9:crygmxl1       | 126    | 140    | 142    | 354    |
| chr13:acta1b        | 126470 | 142885 | 187171 | 118076 |
| chr15:tsku          | 7006   | 6831   | 6935   | 4925   |
| chr22:shc2          | 2281   | 2161   | 2404   | 3480   |
| chr4:zgc-162331     | 2815   | 3029   | 4462   | 2390   |
| chr10:zgc-136871    | 3030   | 2839   | 2962   | 2228   |
| chr11:nuf2          | 268    | 269    | 575    | 544    |
| chr7:zgc-194993     | 466    | 340    | 687    | 623    |
| chr11:tk1           | 613    | 641    | 1034   | 1386   |
| chr20:si-dkey-239i2 | 1327   | 1322   | 1314   | 942    |
| chr21:slc23a1       | 2187   | 2336   | 2935   | 1614   |
| chr16:ddc           | 4623   | 4204   | 4795   | 3312   |
| chr1:LOC556575      | 2739   | 2967   | 3406   | 2725   |
| chr22:LOC553963     | 0      | 1      | 0      | 4      |
| chr22:LOC554274     | 0      | 1      | 0      | 4      |
| chr22:mstna         | 0      | 1      | 0      | 4      |
| chr7:orc6           | 118    | 133    | 159    | 308    |
| chr3:zgc-136545     | 3563   | 3035   | 3569   | 5067   |
| chr19:rbb4          | 3676   | 4198   | 5321   | 6728   |
| chr7:LOC10015154    | 1      | 0      | 3      | 4      |
| chr10:pcna          | 10055  | 10234  | 14809  | 18589  |
| Zv9_NA965:zgc-91    | 57     | 92     | 100    | 271    |
| chr5:hapln1a        | 1513   | 1757   | 2077   | 2657   |
| chr15:zgc-103681    | 757    | 854    | 864    | 563    |
| chr6:her6           | 1760   | 1873   | 2323   | 2912   |
| chr22:gpx4a         | 29586  | 26684  | 25752  | 24672  |
| chr10:slc37a4b      | 5913   | 6032   | 6775   | 5401   |
| chr16:aqp10a        | 1892   | 1891   | 1969   | 1315   |
| chr3:cyp2k18        | 907    | 801    | 851    | 783    |
| chr25:cat           | 19309  | 18188  | 20037  | 14801  |
| Zv9_NA437:fanbcm    | 700    | 666    | 1010   | 1065   |
| chr24:acad11        | 2325   | 2103   | 2645   | 1609   |
| chr18:kif23         | 706    | 771    | 1087   | 1349   |

|                     |        |        |        |        |
|---------------------|--------|--------|--------|--------|
| chr2:dhrs1          | 8539   | 7899   | 8836   | 6015   |
| chr3:col1a1a        | 315631 | 331459 | 647514 | 463062 |
| chr3:crif3          | 5263   | 5542   | 7323   | 8323   |
| chr1:faah2a         | 3400   | 3047   | 3590   | 2578   |
| chr4:wnt5b          | 1827   | 1921   | 3070   | 2639   |
| chr13:gstal         | 12980  | 11224  | 11289  | 10400  |
| chr25:fads2         | 6190   | 5356   | 4986   | 3815   |
| chr2:kcnmb2         | 1048   | 947    | 971    | 747    |
| chr7:slc22a18       | 4658   | 4401   | 4918   | 3707   |
| chr20:epfx1         | 2795   | 2843   | 2627   | 2285   |
| chr20:matn3a        | 20398  | 20414  | 24301  | 38390  |
| chr3:tmem56b        | 9202   | 8351   | 8821   | 6903   |
| chr25:zgc-113028    | 8864   | 8503   | 10599  | 12914  |
| chr25:cyb5r2        | 1443   | 1202   | 1341   | 1060   |
| chr22:aspm          | 1454   | 1583   | 1788   | 2922   |
| chr3:zgc-153036     | 3209   | 2326   | 3361   | 2339   |
| chr9:fstl1b         | 3757   | 3842   | 5196   | 5499   |
| chr1:fstl1a         | 1562   | 1363   | 1656   | 2122   |
| chr11:uox           | 9713   | 8499   | 8239   | 7804   |
| chr25:zgc-152941    | 258    | 313    | 446    | 629    |
| chr1:smarca5        | 6009   | 6468   | 8042   | 10862  |
| chr16:icn           | 37294  | 32639  | 30939  | 34901  |
| chr7:fxr2           | 29762  | 30871  | 36171  | 23544  |
| chr7:pnp5a          | 41063  | 42112  | 46227  | 66062  |
| chr4:si-dkey-31f5.1 | 8661   | 7886   | 8314   | 5909   |
| chr12:itgb3b        | 540    | 494    | 762    | 822    |
| chr18:ilvbl         | 5262   | 5333   | 5759   | 4347   |
| chr2:col11a1b       | 12146  | 12414  | 18583  | 19207  |
| chr20:prg4          | 4238   | 3866   | 3756   | 5521   |
| chr8:slc5a5         | 496    | 813    | 585    | 290    |
| chr6:zgc-123190     | 335    | 306    | 312    | 693    |
| chr1:capn9          | 2917   | 2543   | 3696   | 4612   |
| chr20:cyp2p8        | 2737   | 2424   | 2436   | 1803   |
| chr12:rbp4          | 125010 | 118707 | 142517 | 185355 |
| chr25:aass          | 18693  | 19954  | 21302  | 14944  |
| chr12:asah2         | 20141  | 17994  | 19239  | 13369  |
| chr17:cdk1          | 456    | 448    | 707    | 1005   |
| chr5:grk1b          | 3722   | 3692   | 4060   | 2913   |
| chr20:si-ch211-153  | 43     | 40     | 51     | 78     |
| chr7:col4a5         | 30507  | 31785  | 46898  | 49353  |
| chr21:LOC325449     | 714    | 633    | 977    | 1185   |
| chr14:tdo2a         | 9780   | 7612   | 9564   | 7879   |
| chr21:zgc-153027    | 462    | 478    | 553    | 870    |
| chr2:zgc-153115     | 996    | 930    | 1415   | 1707   |
| chr19:cyp51         | 2111   | 1986   | 2237   | 1429   |
| chr16:dsc1          | 294    | 219    | 415    | 589    |
| chr4:ncaph2         | 403    | 327    | 334    | 755    |
| chr16:mms22l        | 1118   | 1032   | 1599   | 2063   |
| chr18:wee1          | 1294   | 1343   | 1471   | 2315   |
| chr21:sc5dl         | 373    | 377    | 387    | 613    |
| chr4:gys2           | 7106   | 6674   | 8099   | 5883   |

|                     |       |       |       |       |
|---------------------|-------|-------|-------|-------|
| chr3:zgc-112146     | 955   | 686   | 606   | 435   |
| chr12:zgc-109930    | 19496 | 17366 | 28031 | 15816 |
| chr24:zgc-92111     | 4085  | 4506  | 4500  | 3661  |
| chr21: oat          | 7045  | 8205  | 10589 | 10904 |
| chr12:tbx21         | 3015  | 3459  | 4168  | 2600  |
| chr12:zgc-158404    | 362   | 1002  | 1611  | 940   |
| chr23:hmgb2l        | 11479 | 11027 | 17274 | 19186 |
| chr20:slc25a47a     | 7607  | 8094  | 10204 | 5556  |
| chr7:gcs hb         | 2761  | 2524  | 2457  | 2001  |
| chr16:zgc-194131    | 21984 | 21410 | 30911 | 17558 |
| chr15:frem2b        | 6048  | 6437  | 8019  | 8908  |
| chr17:syncripl      | 5193  | 5620  | 7440  | 8110  |
| chr2:cldn15la       | 6197  | 6217  | 7217  | 5196  |
| chr21:LOC568900     | 24017 | 22406 | 22917 | 14800 |
| Zv9_NA735:LOC79     | 44    | 41    | 55    | 97    |
| chr25:stra6         | 10332 | 9990  | 11580 | 8933  |
| chr13:zgc-55307     | 17650 | 15109 | 16927 | 24903 |
| chr24:pi15a         | 221   | 246   | 256   | 427   |
| chr13:abcg5         | 2598  | 2743  | 3362  | 1879  |
| chr10:mmp30         | 9463  | 10436 | 10845 | 7766  |
| chr18:cd276         | 1079  | 1107  | 1563  | 1957  |
| chr13:abcc2         | 70197 | 66260 | 81265 | 51682 |
| chr12:kntc2l        | 531   | 602   | 755   | 1074  |
| chr9:si-dkey-69o16  | 6709  | 5736  | 5657  | 5315  |
| chr7:haus3          | 143   | 154   | 188   | 305   |
| chr8:si-ch211-133lf | 4575  | 3932  | 3564  | 3156  |
| chr2:slc1a8b        | 4862  | 4353  | 4283  | 3936  |
| chr12:pde6c         | 76584 | 77680 | 81646 | 60085 |
| chr3:cyp2k6         | 265   | 237   | 200   | 694   |
| chr23:nr4a1         | 35353 | 24219 | 31202 | 27336 |
| chr3:pold1          | 2291  | 2468  | 3393  | 3908  |
| chr4:socs2          | 3978  | 3928  | 5416  | 3102  |
| chr5:zgc-158432     | 1962  | 2261  | 2905  | 1565  |
| chr7:insig1         | 7568  | 5581  | 7748  | 9160  |
| chr2:itgb1b.2       | 3882  | 3991  | 5240  | 3200  |
| chr11:zgc-113276    | 1792  | 1476  | 1426  | 1133  |
| chr11:zgc-171226    | 205   | 125   | 206   | 531   |
| chr20:gpcpd1        | 13243 | 11977 | 11437 | 18264 |
| chr18:si-dkey-10o6  | 557   | 554   | 534   | 395   |
| chr2:zgc-66286      | 27106 | 23901 | 24404 | 21967 |
| chr22:rrbp1         | 10216 | 11123 | 14825 | 8632  |
| chr25:anpep         | 14248 | 13799 | 15032 | 11475 |
| chr20:cyp2n13       | 7979  | 6607  | 6427  | 5845  |
| chr18:re1t          | 2325  | 1990  | 3174  | 3421  |
| chr6:zgc-162180     | 47    | 68    | 177   | 26    |
| chr19:atxn1a        | 5874  | 5772  | 8141  | 8421  |
| chr16:rab13         | 571   | 546   | 513   | 1130  |
| chr13:zgc-101129    | 1232  | 1335  | 1146  | 980   |
| chr22:LOC563738     | 2695  | 2678  | 2825  | 2087  |
| chr4:slc25a3a       | 3987  | 4715  | 6058  | 3877  |
| chr13:jag1b         | 4286  | 3945  | 5648  | 5737  |

|                    |       |       |       |       |
|--------------------|-------|-------|-------|-------|
| chr3:zgc-136820    | 4526  | 3938  | 4444  | 6418  |
| chr10:zgc-56085    | 10756 | 11587 | 15564 | 9904  |
| chr18:zgc-158671   | 1629  | 1577  | 2246  | 2965  |
| chr19:kifc1        | 1166  | 1124  | 1770  | 2169  |
| Zv9_NA897:tfr2     | 1547  | 1700  | 2123  | 2759  |
| chr1:msxb          | 440   | 520   | 511   | 670   |
| chr6:si-ch211-157f | 4885  | 4687  | 6607  | 7566  |
| chr9:rp42-pen      | 7100  | 5967  | 6782  | 9742  |
| chr1:pdia2         | 12144 | 12276 | 9177  | 8450  |
| chr4:chpt1         | 19182 | 16823 | 20567 | 13497 |
| chr8:znf367        | 572   | 561   | 960   | 965   |
| chr16:sox4b        | 19628 | 15973 | 25179 | 26137 |
| chr17:zgc-92869    | 6564  | 5674  | 6334  | 5414  |
| chr21:pgrmc1       | 4849  | 4411  | 5034  | 4024  |
| chr4:dyrk2         | 9118  | 10728 | 11568 | 8523  |
| chr5:si-ch211-278b | 532   | 459   | 750   | 974   |
| chr23:zgc-123207   | 1131  | 959   | 1181  | 773   |
| chr6:nasp          | 2883  | 2813  | 3535  | 4484  |
| chr19:eif2c3       | 801   | 778   | 956   | 1207  |
| chr24:fen1         | 1054  | 1043  | 1069  | 1615  |
| chr15:zgc-153112   | 1941  | 1867  | 2379  | 3334  |
| chr3:zgc-110417    | 129   | 157   | 200   | 294   |
| chr14:npas4        | 26838 | 25301 | 47541 | 25371 |

| VD-2   | VD-3   | foldChange  | pval      | padj      |
|--------|--------|-------------|-----------|-----------|
| 21436  | 53723  | 11.83405232 | 1.32E-146 | 1.86E-142 |
| 155098 | 319821 | 6.342205479 | 7.00E-82  | 4.92E-78  |
| 5576   | 12095  | 5.459056407 | 7.97E-78  | 3.73E-74  |
| 177906 | 265078 | 4.515225786 | 7.57E-55  | 2.66E-51  |
| 3045   | 1293   | 0.22054844  | 1.12E-52  | 3.16E-49  |
| 2841   | 922    | 0.26146814  | 1.72E-41  | 4.04E-38  |
| 7733   | 1768   | 0.318117891 | 5.15E-33  | 1.03E-29  |
| 3598   | 4702   | 3.259949699 | 3.82E-32  | 6.72E-29  |
| 1172   | 1157   | 0.283095767 | 8.25E-32  | 1.29E-28  |
| 14992  | 13760  | 2.741360285 | 1.88E-29  | 2.65E-26  |
| 5510   | 10758  | 2.685753938 | 5.60E-29  | 7.15E-26  |
| 1731   | 513    | 0.306658132 | 7.95E-29  | 9.31E-26  |
| 86203  | 107363 | 2.816252997 | 1.88E-27  | 2.04E-24  |
| 12383  | 7658   | 0.35744283  | 3.34E-27  | 3.36E-24  |
| 6603   | 4618   | 0.360209331 | 1.79E-26  | 1.63E-23  |
| 1781   | 924    | 0.335311256 | 1.86E-26  | 1.63E-23  |
| 1041   | 198    | 0.281325963 | 5.30E-26  | 4.38E-23  |
| 9701   | 3410   | 0.356539776 | 1.02E-25  | 7.94E-23  |
| 1147   | 2489   | 3.300969579 | 3.80E-24  | 2.81E-21  |
| 16475  | 22233  | 2.500622744 | 6.22E-24  | 4.37E-21  |
| 294    | 130    | 0.215270999 | 1.66E-23  | 1.11E-20  |
| 1025   | 542    | 0.313364665 | 3.33E-23  | 2.13E-20  |
| 2439   | 1021   | 0.369876276 | 4.47E-23  | 2.73E-20  |
| 9121   | 5179   | 0.390108641 | 1.20E-22  | 7.00E-20  |
| 1929   | 587    | 0.362125666 | 2.33E-21  | 1.31E-18  |
| 314    | 1818   | 3.365451168 | 1.07E-20  | 5.77E-18  |
| 14914  | 19152  | 2.259174095 | 3.27E-20  | 1.70E-17  |
| 812    | 122    | 5.321134633 | 4.57E-20  | 2.29E-17  |
| 154    | 80     | 0.203281789 | 1.18E-19  | 5.70E-17  |
| 5663   | 3670   | 0.425190292 | 1.33E-19  | 6.23E-17  |
| 2513   | 4309   | 2.486972539 | 1.54E-19  | 7.01E-17  |
| 16118  | 9574   | 0.403623032 | 1.73E-19  | 7.60E-17  |
| 6036   | 5395   | 0.432671561 | 9.47E-19  | 4.04E-16  |
| 1808   | 3722   | 2.488745271 | 1.08E-18  | 4.48E-16  |
| 17508  | 11072  | 0.43242031  | 2.67E-18  | 1.07E-15  |
| 66129  | 87003  | 2.314076753 | 4.04E-18  | 1.58E-15  |
| 5774   | 10539  | 2.129240007 | 6.64E-18  | 2.52E-15  |
| 6471   | 85399  | 2.347858349 | 3.95E-17  | 1.46E-14  |
| 3295   | 1566   | 0.450137684 | 2.20E-16  | 7.94E-14  |
| 3574   | 2091   | 0.454838585 | 2.75E-16  | 9.67E-14  |
| 452    | 198    | 0.309471064 | 4.12E-16  | 1.41E-13  |
| 4000   | 6327   | 2.046831012 | 7.60E-16  | 2.54E-13  |
| 5648   | 2720   | 0.472171306 | 1.01E-15  | 3.32E-13  |
| 1749   | 1570   | 2.511027869 | 1.12E-15  | 3.57E-13  |
| 1200   | 2242   | 2.47483025  | 1.85E-15  | 5.80E-13  |
| 3341   | 1579   | 0.464480345 | 2.68E-15  | 8.20E-13  |
| 78609  | 53000  | 0.443364522 | 4.57E-15  | 1.37E-12  |
| 3813   | 1888   | 0.472781    | 4.73E-15  | 1.38E-12  |
| 3406   | 5279   | 2.063306345 | 6.56E-15  | 1.88E-12  |
| 3276   | 1560   | 0.469429204 | 7.70E-15  | 2.17E-12  |



|        |        |             |          |          |
|--------|--------|-------------|----------|----------|
| 15394  | 12660  | 2.045671719 | 1.27E-14 | 3.49E-12 |
| 2255   | 1157   | 0.460437847 | 2.59E-14 | 7.01E-12 |
| 2594   | 4442   | 2.091104273 | 2.83E-14 | 7.51E-12 |
| 5787   | 4474   | 0.488309581 | 3.42E-14 | 8.90E-12 |
| 3627   | 1745   | 0.483421125 | 4.53E-14 | 1.16E-11 |
| 1014   | 1932   | 2.560672913 | 5.25E-14 | 1.32E-11 |
| 27545  | 18810  | 0.471840276 | 5.46E-14 | 1.35E-11 |
| 277    | 130    | 0.293854831 | 6.28E-14 | 1.52E-11 |
| 690    | 280    | 0.37869277  | 7.93E-14 | 1.89E-11 |
| 4639   | 2581   | 0.499690999 | 1.77E-13 | 4.14E-11 |
| 2904   | 1720   | 0.48515111  | 2.04E-13 | 4.71E-11 |
| 393536 | 204792 | 0.473349732 | 2.33E-13 | 5.29E-11 |
| 4838   | 4992   | 2.051321393 | 3.24E-13 | 7.24E-11 |
| 13948  | 8143   | 0.498068294 | 3.49E-13 | 7.67E-11 |
| 8969   | 12614  | 1.881989255 | 6.21E-13 | 1.34E-10 |
| 3438   | 1736   | 0.501233903 | 6.36E-13 | 1.36E-10 |
| 1328   | 1565   | 0.470704315 | 8.32E-13 | 1.75E-10 |
| 94992  | 34587  | 0.483205187 | 1.24E-12 | 2.56E-10 |
| 45915  | 30526  | 0.482502693 | 1.35E-12 | 2.75E-10 |
| 4045   | 1540   | 0.503341309 | 1.53E-12 | 3.08E-10 |
| 130511 | 48375  | 0.484671335 | 2.51E-12 | 4.96E-10 |
| 79     | 1442   | 3.278759729 | 5.02E-12 | 9.80E-10 |
| 2359   | 1358   | 0.493461225 | 5.47E-12 | 1.05E-09 |
| 9389   | 6235   | 0.522659956 | 6.51E-12 | 1.24E-09 |
| 758    | 538    | 0.42009458  | 6.67E-12 | 1.25E-09 |
| 169    | 116    | 0.289587003 | 8.04E-12 | 1.49E-09 |
| 775    | 372    | 0.414406508 | 1.04E-11 | 1.90E-09 |
| 5394   | 8818   | 1.840302386 | 1.25E-11 | 2.25E-09 |
| 1637   | 1824   | 2.316154738 | 1.58E-11 | 2.82E-09 |
| 5034   | 3213   | 0.526707166 | 1.76E-11 | 3.10E-09 |
| 3709   | 1733   | 0.524760007 | 2.53E-11 | 4.39E-09 |
| 5409   | 7763   | 1.814913856 | 2.96E-11 | 5.08E-09 |
| 7471   | 6965   | 1.733265681 | 5.91E-11 | 1.00E-08 |
| 10059  | 6682   | 0.534031785 | 6.22E-11 | 1.03E-08 |
| 4154   | 2603   | 0.538134867 | 6.16E-11 | 1.03E-08 |
| 3350   | 1513   | 0.533373991 | 1.15E-10 | 1.87E-08 |
| 3381   | 5831   | 0.556764231 | 1.43E-10 | 2.31E-08 |
| 680    | 244    | 0.42253599  | 1.68E-10 | 2.68E-08 |
| 2460   | 1735   | 0.530568272 | 2.44E-10 | 3.86E-08 |
| 26668  | 16108  | 0.539362436 | 3.07E-10 | 4.74E-08 |
| 276    | 408    | 0.392684322 | 3.04E-10 | 4.74E-08 |
| 2016   | 2070   | 1.942263321 | 3.30E-10 | 5.04E-08 |
| 103062 | 67629  | 0.521624168 | 4.02E-10 | 5.97E-08 |
| 3786   | 3709   | 0.560074361 | 4.03E-10 | 5.97E-08 |
| 2307   | 3335   | 1.898540053 | 4.00E-10 | 5.97E-08 |
| 1198   | 1222   | 0.507204431 | 4.56E-10 | 6.68E-08 |
| 5415   | 3127   | 0.558964451 | 5.17E-10 | 7.49E-08 |
| 4462   | 2954   | 0.559292923 | 5.51E-10 | 7.78E-08 |
| 2869   | 3875   | 1.792042061 | 5.53E-10 | 7.78E-08 |
| 7616   | 5457   | 0.57214602  | 5.51E-10 | 7.78E-08 |
| 1524   | 2740   | 1.964368439 | 6.06E-10 | 8.43E-08 |

|        |        |             |          |          |
|--------|--------|-------------|----------|----------|
| 10     | 544    | 4.417564564 | 7.19E-10 | 9.91E-08 |
| 8853   | 6731   | 0.562000343 | 8.09E-10 | 1.10E-07 |
| 8232   | 7702   | 0.569170814 | 8.46E-10 | 1.14E-07 |
| 12969  | 14269  | 1.697792698 | 8.60E-10 | 1.15E-07 |
| 2342   | 1582   | 0.53897721  | 8.88E-10 | 1.18E-07 |
| 3038   | 1923   | 0.55825674  | 8.99E-10 | 1.18E-07 |
| 5705   | 8899   | 1.739257098 | 9.82E-10 | 1.28E-07 |
| 1247   | 856    | 0.501698933 | 1.26E-09 | 1.62E-07 |
| 3851   | 2703   | 0.566145839 | 1.30E-09 | 1.66E-07 |
| 3499   | 2253   | 0.562706633 | 1.54E-09 | 1.94E-07 |
| 2370   | 3397   | 1.86849834  | 1.78E-09 | 2.23E-07 |
| 3293   | 4722   | 1.752650537 | 1.89E-09 | 2.35E-07 |
| 1680   | 599    | 0.512675969 | 1.91E-09 | 2.36E-07 |
| 1526   | 944    | 0.522352903 | 2.66E-09 | 3.25E-07 |
| 65330  | 110761 | 1.784271001 | 2.75E-09 | 3.33E-07 |
| 7309   | 6034   | 0.571606734 | 3.00E-09 | 3.61E-07 |
| 6407   | 9530   | 1.700362903 | 3.13E-09 | 3.73E-07 |
| 9295   | 4700   | 0.575351151 | 3.79E-09 | 4.48E-07 |
| 650    | 226    | 0.441144909 | 3.96E-09 | 4.64E-07 |
| 1264   | 589    | 0.507513371 | 4.65E-09 | 5.40E-07 |
| 12299  | 18989  | 1.710003735 | 4.80E-09 | 5.53E-07 |
| 8517   | 10479  | 1.658353406 | 5.17E-09 | 5.90E-07 |
| 15515  | 20989  | 1.64593499  | 7.27E-09 | 8.24E-07 |
| 4300   | 3950   | 0.585223211 | 7.63E-09 | 8.59E-07 |
| 80127  | 45884  | 0.547978862 | 8.02E-09 | 8.95E-07 |
| 869    | 1940   | 1.970150955 | 9.29E-09 | 1.03E-06 |
| 11938  | 7028   | 0.594125977 | 1.04E-08 | 1.14E-06 |
| 4779   | 3033   | 0.58567806  | 1.05E-08 | 1.15E-06 |
| 9738   | 22269  | 1.692947346 | 1.07E-08 | 1.15E-06 |
| 1664   | 3390   | 1.829244124 | 1.13E-08 | 1.22E-06 |
| 1472   | 2272   | 1.868398569 | 1.26E-08 | 1.34E-06 |
| 2324   | 3688   | 1.762055562 | 1.41E-08 | 1.49E-06 |
| 2220   | 3756   | 1.768464481 | 1.58E-08 | 1.66E-06 |
| 933    | 728    | 0.507151411 | 1.62E-08 | 1.68E-06 |
| 4814   | 7244   | 1.651278622 | 1.94E-08 | 2.00E-06 |
| 6426   | 4565   | 0.6000826   | 2.02E-08 | 2.08E-06 |
| 30354  | 24564  | 0.574789659 | 2.29E-08 | 2.33E-06 |
| 120213 | 61934  | 0.550607582 | 2.32E-08 | 2.35E-06 |
| 18626  | 19887  | 1.62269339  | 2.76E-08 | 2.77E-06 |
| 14617  | 16000  | 1.63422633  | 2.87E-08 | 2.86E-06 |
| 9532   | 9753   | 0.602925748 | 2.89E-08 | 2.86E-06 |
| 16506  | 12235  | 0.589673066 | 2.91E-08 | 2.86E-06 |
| 10080  | 8574   | 1.646270347 | 3.16E-08 | 3.09E-06 |
| 7528   | 5818   | 0.5990573   | 3.36E-08 | 3.26E-06 |
| 1092   | 1011   | 1.904361263 | 3.96E-08 | 3.79E-06 |
| 1385   | 715    | 0.533712741 | 3.96E-08 | 3.79E-06 |
| 71     | 94     | 0.306338813 | 4.23E-08 | 4.02E-06 |
| 3809   | 5947   | 1.656752464 | 4.64E-08 | 4.38E-06 |
| 7029   | 4370   | 0.602601255 | 4.76E-08 | 4.46E-06 |
| 3763   | 1681   | 1.740012134 | 5.50E-08 | 5.12E-06 |
| 268    | 96     | 0.37456866  | 5.61E-08 | 5.16E-06 |

|       |       |             |          |          |
|-------|-------|-------------|----------|----------|
| 2828  | 1663  | 0.580478871 | 5.61E-08 | 5.16E-06 |
| 229   | 195   | 0.398692084 | 5.85E-08 | 5.34E-06 |
| 998   | 486   | 0.51181854  | 6.29E-08 | 5.71E-06 |
| 17876 | 13257 | 0.603531416 | 7.58E-08 | 6.80E-06 |
| 1803  | 977   | 0.55636258  | 7.59E-08 | 6.80E-06 |
| 2527  | 1505  | 0.577499564 | 7.84E-08 | 6.98E-06 |
| 211   | 184   | 0.396520967 | 8.30E-08 | 7.34E-06 |
| 542   | 196   | 0.463338996 | 9.20E-08 | 8.09E-06 |
| 763   | 439   | 0.498044226 | 9.38E-08 | 8.19E-06 |
| 1448  | 740   | 0.543803004 | 1.01E-07 | 8.76E-06 |
| 19109 | 12379 | 0.603671015 | 1.08E-07 | 9.32E-06 |
| 1937  | 2106  | 1.760918419 | 1.12E-07 | 9.59E-06 |
| 585   | 164   | 0.474602973 | 1.12E-07 | 9.59E-06 |
| 5888  | 4118  | 0.613625275 | 1.13E-07 | 9.59E-06 |
| 992   | 580   | 0.520322595 | 1.27E-07 | 1.07E-05 |
| 1663  | 1882  | 1.779921523 | 1.36E-07 | 1.14E-05 |
| 13461 | 19120 | 1.600870046 | 1.51E-07 | 1.25E-05 |
| 53267 | 43976 | 0.575506675 | 1.52E-07 | 1.26E-05 |
| 1108  | 1861  | 1.900930607 | 1.56E-07 | 1.29E-05 |
| 21681 | 27303 | 1.646062887 | 1.64E-07 | 1.34E-05 |
| 477   | 790   | 2.279452497 | 1.75E-07 | 1.42E-05 |
| 3433  | 3687  | 1.692487815 | 1.78E-07 | 1.43E-05 |
| 1239  | 1231  | 0.556583028 | 1.77E-07 | 1.43E-05 |
| 3451  | 3007  | 0.604803605 | 1.89E-07 | 1.51E-05 |
| 6416  | 8752  | 1.560734129 | 1.92E-07 | 1.53E-05 |
| 2102  | 1324  | 0.573510621 | 1.93E-07 | 1.53E-05 |
| 1987  | 1228  | 0.578558146 | 2.00E-07 | 1.57E-05 |
| 703   | 1328  | 2.003226707 | 2.19E-07 | 1.71E-05 |
| 16832 | 11229 | 0.611372992 | 3.00E-07 | 2.33E-05 |
| 61287 | 50123 | 0.603639901 | 3.11E-07 | 2.40E-05 |
| 1746  | 1586  | 1.711366926 | 3.43E-07 | 2.62E-05 |
| 9664  | 8704  | 0.626777729 | 3.41E-07 | 2.62E-05 |
| 1663  | 2283  | 1.698141585 | 3.69E-07 | 2.77E-05 |
| 6532  | 4810  | 0.624232994 | 3.69E-07 | 2.77E-05 |
| 13497 | 9153  | 0.618324178 | 3.67E-07 | 2.77E-05 |
| 1223  | 1278  | 1.824808043 | 4.46E-07 | 3.33E-05 |
| 1638  | 2738  | 1.738423358 | 4.53E-07 | 3.37E-05 |
| 4174  | 5468  | 1.585659259 | 4.57E-07 | 3.38E-05 |
| 8100  | 8611  | 1.576356564 | 4.64E-07 | 3.42E-05 |
| 1962  | 1087  | 0.589333181 | 4.67E-07 | 3.42E-05 |
| 1098  | 745   | 0.551741709 | 5.31E-07 | 3.87E-05 |
| 4012  | 4641  | 0.637908987 | 5.39E-07 | 3.91E-05 |
| 996   | 622   | 0.542942828 | 6.67E-07 | 4.81E-05 |
| 2541  | 3287  | 1.650392867 | 6.79E-07 | 4.87E-05 |
| 12610 | 6304  | 0.617643687 | 6.83E-07 | 4.87E-05 |
| 8659  | 7165  | 0.622416016 | 7.18E-07 | 5.10E-05 |
| 1423  | 1024  | 0.567150079 | 7.65E-07 | 5.40E-05 |
| 6017  | 3480  | 0.640527511 | 7.70E-07 | 5.42E-05 |
| 3426  | 2181  | 0.623178734 | 7.84E-07 | 5.48E-05 |
| 1686  | 1323  | 0.594259295 | 7.88E-07 | 5.49E-05 |
| 433   | 841   | 2.124178625 | 7.95E-07 | 5.51E-05 |

|        |        |             |          |             |
|--------|--------|-------------|----------|-------------|
| 1933   | 1661   | 0.602953194 | 8.83E-07 | 6.08E-05    |
| 2001   | 2320   | 1.702052665 | 8.91E-07 | 6.11E-05    |
| 2438   | 3936   | 1.67215143  | 9.18E-07 | 6.26E-05    |
| 3870   | 3123   | 0.636295682 | 9.60E-07 | 6.52E-05    |
| 3780   | 5439   | 1.552189374 | 9.88E-07 | 6.68E-05    |
| 2707   | 1727   | 0.618883685 | 1.10E-06 | 7.38E-05    |
| 1348   | 1102   | 0.579726308 | 1.11E-06 | 7.46E-05    |
| 7019   | 4784   | 0.653588359 | 1.18E-06 | 7.88E-05    |
| 851    | 525    | 0.538570632 | 1.33E-06 | 8.84E-05    |
| 4742   | 3991   | 0.646189415 | 1.39E-06 | 9.19E-05    |
| 611    | 376    | 0.511873412 | 1.50E-06 | 9.86E-05    |
| 3352   | 5086   | 1.59435749  | 1.52E-06 | 9.92E-05    |
| 32893  | 24771  | 0.63423209  | 1.55E-06 | 0.000101121 |
| 7057   | 4879   | 0.658712845 | 1.57E-06 | 0.00010179  |
| 5040   | 4098   | 0.651111396 | 1.66E-06 | 0.000107367 |
| 925    | 1393   | 1.804328457 | 1.72E-06 | 0.000110639 |
| 952    | 484    | 0.549957331 | 1.92E-06 | 0.000122218 |
| 1813   | 1015   | 0.597148519 | 1.91E-06 | 0.000122218 |
| 147    | 48     | 0.359285265 | 1.95E-06 | 0.000123756 |
| 8997   | 6022   | 0.637634339 | 1.97E-06 | 0.000124077 |
| 1386   | 1269   | 0.586145628 | 2.01E-06 | 0.000125984 |
| 276    | 92     | 0.43176899  | 2.03E-06 | 0.000127083 |
| 1351   | 2194   | 1.695697594 | 2.21E-06 | 0.000137463 |
| 412    | 1043   | 2.06417572  | 2.23E-06 | 0.00013783  |
| 1831   | 1314   | 0.60820213  | 2.26E-06 | 0.000139248 |
| 1768   | 2488   | 1.662137259 | 2.27E-06 | 0.00013935  |
| 792    | 236    | 0.51533479  | 2.28E-06 | 0.000139635 |
| 19173  | 13194  | 0.646340481 | 2.33E-06 | 0.000141832 |
| 4044   | 4658   | 0.645936955 | 2.36E-06 | 0.000142887 |
| 113084 | 62205  | 0.610666742 | 2.55E-06 | 0.00015389  |
| 806    | 240    | 0.518309201 | 2.62E-06 | 0.000157442 |
| 842    | 554    | 0.544384212 | 2.86E-06 | 0.00017087  |
| 50629  | 35723  | 0.61714677  | 3.01E-06 | 0.000179547 |
| 180    | 67     | 0.39011343  | 3.13E-06 | 0.000184948 |
| 6472   | 4389   | 0.649079672 | 3.14E-06 | 0.000184948 |
| 1736   | 1667   | 0.607447527 | 3.15E-06 | 0.000184948 |
| 1294   | 793    | 0.586759038 | 3.16E-06 | 0.000184948 |
| 15042  | 10052  | 0.636276248 | 3.41E-06 | 0.000198773 |
| 1746   | 3339   | 1.624973968 | 3.47E-06 | 0.000201825 |
| 2126   | 3036   | 1.628636529 | 3.74E-06 | 0.000216571 |
| 6058   | 4569   | 0.654602939 | 3.79E-06 | 0.000218347 |
| 784    | 615    | 1.8097896   | 4.07E-06 | 0.000233583 |
| 52     | 36     | 0.313618442 | 4.19E-06 | 0.000239359 |
| 2730   | 1660   | 0.635137824 | 4.28E-06 | 0.000243631 |
| 3464   | 2327   | 0.647710001 | 4.38E-06 | 0.000248354 |
| 286342 | 251526 | 1.557072934 | 4.69E-06 | 0.000264831 |
| 664    | 339    | 0.53508293  | 5.92E-06 | 0.000332918 |
| 1476   | 1299   | 1.684676318 | 6.04E-06 | 0.000338115 |
| 2266   | 1695   | 0.627428302 | 6.23E-06 | 0.000347411 |
| 994    | 958    | 0.593085337 | 6.62E-06 | 0.000367791 |
| 2132   | 2804   | 1.589915651 | 6.66E-06 | 0.000368802 |

|       |       |             |          |             |
|-------|-------|-------------|----------|-------------|
| 7758  | 11084 | 1.47506145  | 6.83E-06 | 0.000376368 |
| 23839 | 10901 | 0.642979005 | 6.98E-06 | 0.000383125 |
| 23745 | 19256 | 0.64959545  | 7.00E-06 | 0.00038315  |
| 13910 | 10264 | 0.647637599 | 7.05E-06 | 0.000384204 |
| 1710  | 1610  | 0.620027691 | 7.13E-06 | 0.00038713  |
| 750   | 417   | 0.554392134 | 7.49E-06 | 0.000404914 |
| 886   | 1258  | 1.762601698 | 7.74E-06 | 0.000416876 |
| 1186  | 1026  | 0.588774564 | 7.83E-06 | 0.000418699 |
| 50842 | 52052 | 1.58557918  | 7.82E-06 | 0.000418699 |
| 8227  | 11588 | 1.48871949  | 7.91E-06 | 0.000421015 |
| 2017  | 1631  | 0.62925853  | 7.96E-06 | 0.000422487 |
| 343   | 549   | 2.118800942 | 8.08E-06 | 0.000426483 |
| 1299  | 980   | 0.603244603 | 8.10E-06 | 0.000426483 |
| 17781 | 20967 | 1.526080773 | 8.21E-06 | 0.000430633 |
| 309   | 159   | 0.474787237 | 8.45E-06 | 0.000440602 |
| 14793 | 9935  | 0.657720265 | 8.46E-06 | 0.000440602 |
| 1958  | 1944  | 0.638614859 | 8.50E-06 | 0.000441071 |
| 1885  | 1861  | 0.629730828 | 8.83E-06 | 0.000456177 |
| 1523  | 4134  | 1.653825729 | 9.18E-06 | 0.000472543 |
| 97718 | 71476 | 0.635779932 | 9.25E-06 | 0.000474447 |
| 6558  | 7460  | 1.481519771 | 9.46E-06 | 0.000483478 |
| 1225  | 1829  | 1.692933029 | 9.61E-06 | 0.000489488 |
| 22183 | 25203 | 1.502639348 | 1.05E-05 | 0.000533829 |
| 3751  | 4525  | 1.571386568 | 1.06E-05 | 0.000538123 |
| 18771 | 13698 | 0.65037052  | 1.16E-05 | 0.000585134 |
| 719   | 479   | 0.562890866 | 1.21E-05 | 0.000607598 |
| 578   | 971   | 1.858781126 | 1.29E-05 | 0.000644818 |
| 1373  | 948   | 0.606439325 | 1.30E-05 | 0.000649218 |
| 80    | 1935  | 2.048615891 | 1.32E-05 | 0.000656875 |
| 8761  | 6976  | 0.666851776 | 1.33E-05 | 0.000657992 |
| 2     | 54    | 15.16546255 | 1.42E-05 | 0.000699397 |
| 15524 | 9392  | 0.647218247 | 1.48E-05 | 0.000728031 |
| 1903  | 2203  | 1.540930874 | 1.50E-05 | 0.000734629 |
| 299   | 3037  | 1.798361608 | 1.50E-05 | 0.000734629 |
| 2247  | 3513  | 1.543682766 | 1.53E-05 | 0.000744695 |
| 12370 | 10043 | 0.672658857 | 1.54E-05 | 0.000744695 |
| 143   | 933   | 2.286931467 | 1.55E-05 | 0.000750251 |
| 3116  | 2809  | 1.513026093 | 1.60E-05 | 0.000769434 |
| 2178  | 1397  | 0.638353155 | 1.70E-05 | 0.00081435  |
| 1136  | 906   | 0.613693622 | 1.80E-05 | 0.000857442 |
| 663   | 462   | 0.561182272 | 1.79E-05 | 0.000857442 |
| 15342 | 16089 | 1.477704741 | 1.81E-05 | 0.000857442 |
| 720   | 1236  | 1.74200856  | 1.82E-05 | 0.000863628 |
| 253   | 396   | 2.219044379 | 1.90E-05 | 0.000895343 |
| 2386  | 1768  | 0.648617615 | 1.91E-05 | 0.000900489 |
| 1317  | 877   | 0.613078113 | 1.95E-05 | 0.00091412  |
| 7335  | 5120  | 0.68667804  | 2.03E-05 | 0.000942878 |
| 10090 | 13722 | 1.452870411 | 2.02E-05 | 0.000942878 |
| 694   | 608   | 0.578488016 | 2.06E-05 | 0.000954143 |
| 1931  | 2492  | 1.579646151 | 2.14E-05 | 0.000987783 |
| 2795  | 1792  | 0.655260415 | 2.15E-05 | 0.000989197 |

|       |       |             |          |             |
|-------|-------|-------------|----------|-------------|
| 16330 | 22856 | 1.469957226 | 2.26E-05 | 0.001036614 |
| 4794  | 3269  | 0.669046403 | 2.31E-05 | 0.001059373 |
| 5537  | 7661  | 1.463661767 | 2.33E-05 | 0.001063506 |
| 4534  | 5645  | 1.480260142 | 2.34E-05 | 0.001063506 |
| 21360 | 16786 | 0.66670189  | 2.41E-05 | 0.001092376 |
| 14449 | 14891 | 1.454251088 | 2.49E-05 | 0.001126634 |
| 7161  | 1767  | 0.649800132 | 2.54E-05 | 0.001144659 |
| 4359  | 5323  | 1.496690672 | 2.63E-05 | 0.001169507 |
| 16046 | 81697 | 1.567479999 | 2.61E-05 | 0.001169507 |
| 756   | 436   | 0.573061749 | 2.63E-05 | 0.001169507 |
| 6352  | 4101  | 0.678596077 | 2.63E-05 | 0.001169507 |
| 3170  | 2658  | 0.669882573 | 2.65E-05 | 0.00117337  |
| 20427 | 24626 | 1.457881191 | 2.65E-05 | 0.00117337  |
| 128   | 86    | 0.422557993 | 2.68E-05 | 0.001180971 |
| 21842 | 28791 | 1.46291381  | 2.69E-05 | 0.001182315 |
| 196   | 103   | 0.448445322 | 2.98E-05 | 0.001304224 |
| 10601 | 8701  | 0.668147641 | 3.13E-05 | 0.001364742 |
| 4066  | 2034  | 0.684705866 | 3.19E-05 | 0.001389814 |
| 298   | 208   | 2.206185385 | 3.35E-05 | 0.001454866 |
| 93757 | 73141 | 0.658870286 | 3.53E-05 | 0.001525401 |
| 4333  | 4189  | 0.680736648 | 3.69E-05 | 0.001593032 |
| 2659  | 3529  | 1.488045398 | 3.91E-05 | 0.001675793 |
| 2055  | 2013  | 0.668133025 | 3.90E-05 | 0.001675793 |
| 1873  | 1338  | 0.644331946 | 3.96E-05 | 0.001685907 |
| 586   | 810   | 1.909709505 | 3.96E-05 | 0.001685907 |
| 759   | 1098  | 1.813692633 | 4.12E-05 | 0.001750353 |
| 989   | 1233  | 1.680359169 | 4.22E-05 | 0.001778521 |
| 731   | 541   | 0.582155245 | 4.21E-05 | 0.001778521 |
| 1718  | 1192  | 0.645610005 | 4.22E-05 | 0.001778521 |
| 3281  | 2111  | 0.674043764 | 4.30E-05 | 0.001804237 |
| 1814  | 1132  | 0.646700709 | 4.51E-05 | 0.001863265 |
| 6     | 26    | 36.40731048 | 4.50E-05 | 0.001863265 |
| 6     | 26    | 36.40731048 | 4.50E-05 | 0.001863265 |
| 6     | 26    | 36.40731048 | 4.50E-05 | 0.001863265 |
| 242   | 303   | 2.202250681 | 4.47E-05 | 0.001863265 |
| 4458  | 4437  | 1.449830911 | 4.68E-05 | 0.001931042 |
| 4345  | 6916  | 1.441396073 | 4.85E-05 | 0.001992808 |
| 1     | 46    | 14.85640602 | 5.09E-05 | 0.002084557 |
| 12940 | 16305 | 1.444597108 | 5.12E-05 | 0.002087096 |
| 93    | 214   | 2.40591583  | 5.12E-05 | 0.002087096 |
| 2403  | 2594  | 1.519930355 | 5.22E-05 | 0.002122721 |
| 389   | 333   | 0.540393998 | 5.25E-05 | 0.002126813 |
| 2228  | 3311  | 1.505638545 | 5.33E-05 | 0.002155058 |
| 17286 | 11121 | 0.668941182 | 5.41E-05 | 0.002177772 |
| 4525  | 2321  | 0.684186923 | 5.86E-05 | 0.002354135 |
| 1399  | 700   | 0.625088754 | 5.90E-05 | 0.002357636 |
| 439   | 124   | 0.535687834 | 5.90E-05 | 0.002357636 |
| 13443 | 9320  | 0.686301991 | 5.93E-05 | 0.002363305 |
| 1100  | 1508  | 1.666135072 | 5.96E-05 | 0.002368698 |
| 1462  | 1234  | 0.643999509 | 6.02E-05 | 0.002383093 |
| 896   | 1690  | 1.635085165 | 6.37E-05 | 0.002507108 |

|        |        |             |             |             |
|--------|--------|-------------|-------------|-------------|
| 6249   | 4358   | 0.695341073 | 6.38E-05    | 0.002507108 |
| 679106 | 636931 | 1.50875182  | 6.40E-05    | 0.002507108 |
| 7321   | 8766   | 1.434726365 | 6.40E-05    | 0.002507108 |
| 2010   | 1763   | 0.664110375 | 6.84E-05    | 0.002670068 |
| 3345   | 3500   | 1.509689624 | 7.36E-05    | 0.002867762 |
| 8203   | 4875   | 0.68729235  | 7.54E-05    | 0.002927153 |
| 3557   | 3407   | 0.684347363 | 7.65E-05    | 0.002963634 |
| 562    | 309    | 0.565768133 | 8.18E-05    | 0.003158447 |
| 3045   | 2341   | 0.682227817 | 8.27E-05    | 0.003185878 |
| 1586   | 1289   | 0.64685687  | 8.43E-05    | 0.003222264 |
| 22080  | 28412  | 1.425716613 | 8.40E-05    | 0.003222264 |
| 5687   | 4883   | 0.69418361  | 8.41E-05    | 0.003222264 |
| 10055  | 14525  | 1.421522993 | 8.47E-05    | 0.003225678 |
| 711    | 516    | 0.59525217  | 8.66E-05    | 0.00329155  |
| 1518   | 2474   | 1.495634958 | 8.83E-05    | 0.003345072 |
| 2303   | 972    | 0.666599999 | 8.90E-05    | 0.003363202 |
| 5904   | 5770   | 1.43756063  | 9.31E-05    | 0.003510907 |
| 2034   | 2388   | 1.518518595 | 9.53E-05    | 0.003564453 |
| 5966   | 3810   | 0.689453049 | 9.51E-05    | 0.003564453 |
| 436    | 689    | 1.83753508  | 9.53E-05    | 0.003564453 |
| 6798   | 9767   | 1.406967102 | 9.68E-05    | 0.003609751 |
| 21365  | 9722   | 0.669034143 | 9.75E-05    | 0.003625792 |
| 21624  | 18099  | 0.691040852 | 9.88E-05    | 0.003666    |
| 57554  | 53756  | 1.444786391 | 9.92E-05    | 0.003669082 |
| 6176   | 4417   | 0.700602908 | 0.000100002 | 0.003690358 |
| 907    | 1103   | 1.700946795 | 0.000104381 | 0.003841884 |
| 3801   | 2626   | 0.691436227 | 0.00010584  | 0.003865163 |
| 19651  | 19157  | 1.443208351 | 0.000105315 | 0.003865163 |
| 4200   | 6180   | 1.407840814 | 0.000106093 | 0.003865163 |
| 400    | 263    | 0.531806997 | 0.000106113 | 0.003865163 |
| 340    | 622    | 1.803042789 | 0.000106544 | 0.003870831 |
| 3352   | 4487   | 1.442700876 | 0.0001074   | 0.003881843 |
| 1635   | 1288   | 0.65240506  | 0.000107219 | 0.003881843 |
| 152173 | 194329 | 1.45799819  | 0.000113198 | 0.004071564 |
| 13119  | 11598  | 0.696641852 | 0.000113228 | 0.004071564 |
| 13725  | 10868  | 0.698853263 | 0.000116255 | 0.004165129 |
| 633    | 948    | 1.704688114 | 0.000116422 | 0.004165129 |
| 2283   | 2237   | 0.680210221 | 0.000117475 | 0.004192142 |
| 97     | 168    | 2.764077131 | 0.000119858 | 0.004259338 |
| 48252  | 51096  | 1.460202296 | 0.000119964 | 0.004259338 |
| 827    | 1533   | 1.628871759 | 0.000121034 | 0.004286483 |
| 6746   | 3431   | 0.701704972 | 0.000121918 | 0.004306951 |
| 750    | 787    | 1.704639243 | 0.00012354  | 0.004353329 |
| 1353   | 1836   | 1.564215845 | 0.000126576 | 0.004449144 |
| 1228   | 1235   | 0.647965195 | 0.000128228 | 0.004495964 |
| 332    | 688    | 1.850439885 | 0.000130149 | 0.004551974 |
| 462    | 585    | 1.759663986 | 0.000131689 | 0.004594424 |
| 1504   | 1867   | 1.540862217 | 0.000134907 | 0.004694141 |
| 1613   | 1968   | 1.50546519  | 0.000135432 | 0.004694141 |
| 433    | 851    | 1.760895234 | 0.000135549 | 0.004694141 |
| 4837   | 3918   | 0.70408938  | 0.000135981 | 0.004697524 |

|       |       |             |             |             |
|-------|-------|-------------|-------------|-------------|
| 541   | 208   | 0.552713243 | 0.000137115 | 0.004725093 |
| 16666 | 10708 | 0.712588338 | 0.000138976 | 0.00476586  |
| 2895  | 2035  | 0.684712982 | 0.000138933 | 0.00476586  |
| 10741 | 12557 | 1.41607544  | 0.000140931 | 0.004821151 |
| 2271  | 2023  | 0.685570618 | 0.000141325 | 0.004822876 |
| 646   | 2800  | 1.618671463 | 0.000143091 | 0.004871315 |
| 14574 | 19356 | 1.424576518 | 0.000145197 | 0.004931092 |
| 6450  | 5369  | 0.717617534 | 0.000146672 | 0.00496916  |
| 1687  | 1185  | 0.656748181 | 0.000147406 | 0.004982041 |
| 15020 | 16776 | 0.70795092  | 0.000148017 | 0.004990677 |
| 8301  | 9865  | 1.406847653 | 0.000151646 | 0.005100807 |
| 6414  | 9598  | 1.407853784 | 0.000156258 | 0.00524342  |
| 4183  | 3770  | 0.704680742 | 0.000160849 | 0.00536264  |
| 17707 | 13494 | 0.70374077  | 0.000160438 | 0.00536264  |
| 88    | 167   | 2.697683731 | 0.000160955 | 0.00536264  |
| 7311  | 5263  | 0.707368693 | 0.000161568 | 0.005370319 |
| 17352 | 24085 | 1.401737552 | 0.000162536 | 0.005389757 |
| 334   | 523   | 1.876582416 | 0.000172108 | 0.005693746 |
| 2141  | 1546  | 0.682037093 | 0.000174215 | 0.005749923 |
| 7244  | 5718  | 0.710215496 | 0.000179602 | 0.005913843 |
| 1606  | 1816  | 1.526800477 | 0.000189327 | 0.006219465 |
| 52284 | 38551 | 0.694164335 | 0.000194076 | 0.006360611 |
| 767   | 1072  | 1.633109231 | 0.000199473 | 0.006522287 |
| 3867  | 2973  | 0.696930516 | 0.000204188 | 0.006660996 |
| 194   | 419   | 2.007375088 | 0.00020869  | 0.006792095 |
| 2585  | 2206  | 0.685824397 | 0.000210493 | 0.006834954 |
| 2932  | 2097  | 0.689658623 | 0.000211155 | 0.006840648 |
| 50804 | 43689 | 0.68796364  | 0.000213641 | 0.006905269 |
| 274   | 288   | 1.809591256 | 0.00021451  | 0.00691746  |
| 18376 | 14947 | 0.696157024 | 0.000215505 | 0.006933642 |
| 3026  | 4042  | 1.432602585 | 0.000217366 | 0.006972414 |
| 3070  | 2686  | 0.709300957 | 0.000217702 | 0.006972414 |
| 1366  | 1578  | 0.673439651 | 0.000218815 | 0.006992133 |
| 10692 | 7500  | 1.396882756 | 0.00021969  | 0.007004164 |
| 3261  | 2262  | 0.707630962 | 0.00022988  | 0.007312463 |
| 992   | 712   | 0.630982281 | 0.000233679 | 0.007383213 |
| 201   | 272   | 1.933946017 | 0.000233526 | 0.007383213 |
| 12825 | 17170 | 1.375159904 | 0.000233123 | 0.007383213 |
| 259   | 187   | 0.528200145 | 0.000236106 | 0.007443149 |
| 15311 | 13313 | 0.697228194 | 0.000236851 | 0.007449937 |
| 8419  | 7538  | 0.725023801 | 0.000242884 | 0.007605671 |
| 9492  | 8226  | 0.711494072 | 0.000242368 | 0.007605671 |
| 4827  | 3549  | 0.705238389 | 0.000249673 | 0.007800894 |
| 2885  | 3781  | 1.441133408 | 0.000262494 | 0.008183285 |
| 20    | 41    | 0.328455717 | 0.000263464 | 0.008195353 |
| 7669  | 9735  | 1.395809889 | 0.000265672 | 0.008245817 |
| 545   | 870   | 1.611753399 | 0.000268279 | 0.008308386 |
| 644   | 569   | 0.610108799 | 0.000277357 | 0.008570629 |
| 1962  | 1235  | 0.677121491 | 0.000278111 | 0.008575096 |
| 3305  | 2752  | 0.712893255 | 0.000278815 | 0.008577979 |
| 5102  | 7324  | 1.400505861 | 0.000280363 | 0.008588012 |



|       |       |             |             |             |
|-------|-------|-------------|-------------|-------------|
| 5261  | 5252  | 1.37939703  | 0.000280039 | 0.008588012 |
| 8382  | 7599  | 0.724347567 | 0.000282969 | 0.008592961 |
| 2133  | 2416  | 1.45850288  | 0.000282382 | 0.008592961 |
| 1350  | 2218  | 1.501976042 | 0.000282393 | 0.008592961 |
| 2648  | 1985  | 1.460441214 | 0.000281912 | 0.008592961 |
| 641   | 992   | 1.663254052 | 0.000289084 | 0.008759747 |
| 5896  | 7671  | 1.388946511 | 0.000289921 | 0.008766224 |
| 7257  | 8861  | 1.368863804 | 0.000292405 | 0.008822337 |
| 8263  | 6129  | 0.708822532 | 0.000296774 | 0.008934987 |
| 13411 | 11415 | 0.718359107 | 0.000299501 | 0.008997822 |
| 918   | 1262  | 1.62314793  | 0.000300565 | 0.00901054  |
| 24056 | 30074 | 1.414954934 | 0.000301714 | 0.009023959 |
| 4071  | 3132  | 0.709092778 | 0.000302296 | 0.009023959 |
| 3144  | 2452  | 0.704650085 | 0.000306206 | 0.009121321 |
| 6594  | 6372  | 0.718475322 | 0.000310773 | 0.00921828  |
| 572   | 1135  | 1.638963909 | 0.000310119 | 0.00921828  |
| 605   | 531   | 0.61318716  | 0.000316007 | 0.009353815 |
| 2963  | 4791  | 1.400397846 | 0.00031869  | 0.009413414 |
| 877   | 1632  | 1.556356785 | 0.000320997 | 0.009461665 |
| 1088  | 1832  | 1.504638828 | 0.000329559 | 0.009693729 |
| 2489  | 2579  | 1.431317599 | 0.000334685 | 0.009823958 |
| 200   | 407   | 1.974379452 | 0.000339051 | 0.009931357 |
| 20494 | 21537 | 0.725449946 | 0.00034035  | 0.009948692 |

| <b>Row.names</b>        | <b>VD-1 in experiment 2</b> | <b>VD-2 in experiment 2</b> |
|-------------------------|-----------------------------|-----------------------------|
| chr8:hsp70l             | 656                         | 601                         |
| chr24:ahrra             | 175                         | 210                         |
| chr3:zgc-174006         | 221                         | 144                         |
| chr3:hsp70              | 365                         | 275                         |
| chr4:lepb               | 39                          | 34                          |
| chr13:slc1a4            | 3629                        | 2594                        |
| chr4:si-dkey-14d8.6     | 25274                       | 26107                       |
| chr16:fabp10a           | 81059                       | 53267                       |
| chr19:cyt1l             | 112148                      | 103062                      |
| chr19:sesn2             | 1392                        | 1105                        |
| chr1:dnajb1b            | 1086                        | 804                         |
| chr8:ela2               | 242009                      | 349930                      |
| chr3:gtpbp1             | 8782                        | 7116                        |
| chr7:LOC562139          | 97944                       | 105531                      |
| chr5:ela3l              | 289976                      | 337496                      |
| chr12:scd               | 371                         | 338                         |
| chr3:cyp2k6             | 694                         | 274                         |
| chr22:zgc-110409        | 9373                        | 9532                        |
| chr16:zgc-171704        | 29                          | 28                          |
| chr5:hmgcra             | 3755                        | 2720                        |
| chr1:cryaa              | 31854                       | 25836                       |
| chr7:zgc-136461         | 161841                      | 171503                      |
| chr17:zgc-92137         | 94584                       | 102799                      |
| chr20:atf3              | 5472                        | 4544                        |
| chr5:LOC796384          | 2537                        | 1824                        |
| chr20:ctsbb             | 10288                       | 8834                        |
| chr23:mipa              | 35881                       | 34353                       |
| chr5:ins                | 1945                        | 1591                        |
| chr3:timp2b             | 2120                        | 1379                        |
| chr18:si-ch211-107o23.1 | 1515                        | 1110                        |
| Zv9_NA930:zgc-112199    | 62                          | 83                          |
| chr14:fosl1             | 2262                        | 2635                        |
| chr15:zgc-110266        | 1560                        | 1319                        |
| chr5:gc                 | 17001                       | 12610                       |
| chr13:zgc-171534        | 3759                        | 2784                        |
| chr12:asah2             | 13369                       | 13725                       |
| chr1:slc34a2a           | 8516                        | 8232                        |
| chr5:psat1              | 2972                        | 1578                        |
| chr5:tars               | 7166                        | 4979                        |
| chr6:zgc-162630         | 9991                        | 9503                        |
| chr23:mipb              | 57888                       | 53949                       |
| chr12:gip               | 405916                      | 393536                      |
| chr12:socs3b            | 7445                        | 5566                        |
| chr20:mep1a.2           | 7410                        | 6472                        |
| chr3:grifin             | 7869                        | 5099                        |
| chr5:zgc-110340         | 4782                        | 4662                        |
| chr11:zgc-110286        | 136                         | 158                         |
| chr1:sparcl1            | 4450                        | 3231                        |
| chr18:si-ch211-219a15.3 | 1114                        | 854                         |
| chr7:six7               | 22022                       | 18474                       |

|                        |        |        |
|------------------------|--------|--------|
| chr25:cpa5             | 271951 | 325993 |
| chr16:pklr             | 62712  | 61287  |
| chr1:si-ch73-6k14.1    | 432    | 274    |
| chr5:ptrh1             | 452    | 307    |
| chr5:LOC559192         | 393    | 246    |
| chr7:zgc-172290        | 6      | 8      |
| chr15:pmepa1           | 81957  | 94992  |
| chr4:kera              | 2959   | 2938   |
| chr19:yars             | 7747   | 5744   |
| chr25:cpa1             | 33508  | 37363  |
| chr2:pnp5b             | 2519   | 1985   |
| chr1:junb              | 7920   | 9235   |
| chr1:LOC100005630      | 2399   | 2342   |
| chr2:tfr1a             | 3359   | 2698   |
| chr16:zgc-92590        | 1854   | 1172   |
| chr9:crygm2c           | 1188   | 947    |
| chr9:zgc-153846        | 2706   | 1649   |
| chr16:zgc-136551       | 4815   | 4325   |
| chr3:slc4a1            | 7239   | 6554   |
| chr22:zgc-92511        | 5646   | 5920   |
| chr2:grk7a             | 23836  | 21360  |
| chr9:cx50.5            | 915    | 793    |
| chr24:cpb1             | 151527 | 196414 |
| chr7:zgc-172260        | 131    | 37     |
| chr1:zgc-153118        | 16     | 47     |
| chr1:cyp4v2            | 4349   | 4045   |
| chr5:si-dkey-127j5.5   | 12215  | 11233  |
| chr1:cx44.1            | 1930   | 1536   |
| chr13:comtd1           | 525    | 408    |
| chr4:si-dkey-14d8.7    | 1312   | 1373   |
| chr5:nos2a             | 74     | 80     |
| chr16:aqp10a           | 1315   | 1399   |
| chr21:cell             | 42660  | 48375  |
| chr11:vgll4            | 115647 | 130511 |
| chr13:brf1a            | 1812   | 1304   |
| chr18:lctlb            | 6824   | 4547   |
| chr19:si-dkeyp-113d7.4 | 363827 | 286342 |
| chr20:mep1a.1          | 9284   | 7772   |
| chr6:opn1mw2           | 454    | 379    |
| chr15:hmbbsb           | 1000   | 633    |
| chr11:zgc-110377       | 3325   | 2359   |
| chr1:rtn4rl2a          | 5511   | 5172   |
| chr1:zgc-154142        | 6021   | 7733   |
| chr6:opn1mw1           | 12141  | 12383  |
| chr2:si-ch73-252g14.4  | 6807   | 5549   |
| chr20:mep1b            | 4919   | 4300   |
| chr7:zgc-112160        | 194421 | 246294 |
| chr20:ociad2           | 1251   | 1112   |
| chr15:guca1c           | 8086   | 6016   |
| chr24:zgc-162925       | 2544   | 2140   |
| chr7:zgc-162126        | 11927  | 9651   |

|                         |         |         |
|-------------------------|---------|---------|
| chr8:LOC798846          | 429     | 465     |
| chr9:phgdh              | 6016    | 4387    |
| chr14:zgc-154020        | 6045    | 6471    |
| chr15:chchd2            | 8158    | 8484    |
| chr15:hsp47             | 861     | 761     |
| chr5:mthfd2             | 696     | 514     |
| chr17:odc1              | 18584   | 16976   |
| chr5:hmbsa              | 1168    | 795     |
| chr17:ctsl.1            | 48350   | 40051   |
| chr25:cpa2              | 422     | 249     |
| chr8:zgc-136909         | 1181    | 1294    |
| chr24:zgc-172142        | 1335    | 1024    |
| chr8:ela2l              | 336669  | 407366  |
| chr7:zgc-171537         | 638     | 650     |
| chr12:si-ch211-215111.5 | 52605   | 52148   |
| chr12:slc16a3           | 6044    | 4937    |
| chr12:zgc-158404        | 940     | 646     |
| chr3:hspb9              | 6344    | 3559    |
| chr2:zgc-136930         | 256630  | 234192  |
| chr17:prox2             | 1392    | 1256    |
| chr21:zgc-153027        | 870     | 750     |
| chr7:c6ast4             | 149337  | 151730  |
| chr16:try               | 1094010 | 1260012 |
| chr7:cars               | 4092    | 3070    |
| chr23:zgc-101050        | 5634    | 4351    |
| chr22:he1a              | 152     | 56      |
| chr4:slc26a3            | 375     | 812     |
| chr20:ptgs2b            | 2142    | 1668    |
| chr9:crygm1             | 274     | 127     |
| chr8:alas2              | 4747    | 3208    |
| chr16:zgc-66382         | 847175  | 1058202 |
| chr10:slc5a1            | 26899   | 24820   |
| chr25:zgc-136980        | 12041   | 9006    |
| chr12:zgc-112285        | 29501   | 23397   |
| chr7:c6ast3             | 8154    | 8832    |
| chr12:crygmx            | 38464   | 29784   |
| chr18:ctsh              | 4826    | 3524    |
| chr14:hbegfa            | 1299    | 1321    |
| chr8:cebpb              | 17561   | 21677   |
| chr22:atad3b            | 12026   | 12138   |
| chr19:asns              | 4459    | 3370    |
| chr6:mars               | 16689   | 14057   |
| chr20:hsp90a.1          | 9273    | 8185    |
| chr17:wars              | 2899    | 2072    |
| chr16:invs              | 1134    | 1078    |
| chr19:slc2a3            | 10087   | 7602    |
| chr2:ptgs2a             | 3112    | 2970    |
| chr11:LOC795788         | 2499    | 2341    |
| chr18:LOC567512         | 706     | 569     |
| chr3:pdap1              | 2976    | 2629    |
| chr10:ambpl             | 22151   | 17942   |

|                       |         |         |
|-----------------------|---------|---------|
| chr7:zgc-153723       | 331     | 299     |
| chr9:col8a1a          | 3108    | 1985    |
| chr4:ms4a17a.17       | 1806    | 1107    |
| chr7:slc1a2a          | 7093    | 6048    |
| chr8:si-ch211-229n2.6 | 2       | 4       |
| chr5:nox1             | 90      | 143     |
| chr2:slc1a8b          | 3936    | 2932    |
| chr8:rh50             | 982     | 690     |
| chr3:zgc-172051       | 7438    | 6168    |
| chr15:il12a           | 80      | 58      |
| chr21:gfpt2           | 3820    | 3489    |
| chr15:zgc-153258      | 2246    | 2469    |
| chr4:calua            | 2341    | 1877    |
| chr6:slc15a1b         | 41025   | 41839   |
| chr15:rbp2a           | 11357   | 7791    |
| chr9:slc15a2          | 6219    | 4760    |
| chr5:pdzd3b           | 1325    | 1247    |
| chr22:ahsg            | 2716    | 2439    |
| chr3:nme4             | 1600    | 1476    |
| chr8:unc45b           | 2282    | 1933    |
| chr2:mpv17l2          | 899     | 571     |
| chr2:tfa              | 55477   | 45915   |
| chr9:ugt1ab           | 4382    | 4639    |
| chr14:iclp1           | 876     | 653     |
| Zv9_NA892:cyp1c1      | 1239    | 979     |
| chr5:apoa1            | 157501  | 124568  |
| chr11:mustn1          | 827     | 623     |
| chr22:si-dkey-21e7.2  | 9926    | 7339    |
| chr12:aqp8a.2         | 3877    | 3499    |
| chr18:cyp1a           | 12185   | 9998    |
| chr21:LOC568900       | 14800   | 17707   |
| chr21:zgc-153096      | 652     | 474     |
| chr8:zgc-110354       | 5267    | 3960    |
| chr8:tfe3a            | 3596    | 3147    |
| chr7:ctrb1            | 1414902 | 1662008 |
| chr22:cp              | 25679   | 19268   |
| chr4:epyc             | 5572    | 4881    |
| chr2:hig1             | 8431    | 5440    |
| chr7:zgc-92903        | 2436    | 1923    |
| chr12:zgc-85752       | 2887    | 2691    |
| chr21:fabp6           | 25236   | 17587   |
| chr23:pm20d1.1        | 5742    | 4794    |
| chr12:shbg            | 4021    | 2793    |
| chr21:zgc-122979      | 21060   | 18729   |
| chr22:LOC792509       | 12230   | 8949    |
| chr22:zgc-92041       | 1123006 | 1345634 |
| chr5:hspb8            | 2481    | 2227    |
| chr18:ces3            | 1551    | 1929    |
| chr19:zgc-110064      | 12724   | 9389    |
| chr16:zgc-193613      | 153579  | 113084  |
| chr9:ugt1a1           | 5390    | 5648    |

|                         |        |        |
|-------------------------|--------|--------|
| chr6:zgc-86706          | 11208  | 6849   |
| chr15:ctrl              | 428944 | 500386 |
| chr18:lepa              | 114    | 57     |
| chr22:si-ch211-140f21.1 | 13592  | 9771   |
| chr16:dpys              | 1953   | 2255   |
| chr9:rdh1               | 7728   | 6352   |
| chr1:zgc-153286         | 4012   | 3965   |
| chr15:ca4b              | 811    | 1010   |
| chr5:c9                 | 11953  | 10656  |
| chr14:xpnpep2           | 2878   | 3036   |
| chr22:gcca              | 1442   | 1085   |
| chr8:crybb2             | 40     | 23     |
| chr2:agxtb              | 40726  | 31531  |
| chr21:LOC559127         | 4064   | 3582   |
| chr12:zgc-163057        | 204    | 93     |
| chr22:zgc-63647         | 5478   | 4873   |
| chr22:dpp4              | 8660   | 8426   |
| chr16:zgc-174888        | 1556   | 1119   |
| chr19:psmb8             | 415    | 379    |
| chr19:si-ch211-81a5.8   | 6214   | 5508   |
| chr21:zgc-110053        | 2731   | 1529   |
| chr3:LOC573653          | 12314  | 11634  |
| chr4:slc38a4            | 30160  | 25032  |
| chr9:nyx                | 3118   | 2511   |
| chr8:LOC100006238       | 5161   | 4550   |
| chr14:npas4             | 25371  | 20494  |
| chr8:foxe3              | 284    | 228    |
| chr11:uox               | 7804   | 5966   |
| chr2:amy2a              | 144583 | 149847 |
| chr10:cldn5b            | 2183   | 1931   |
| chr14:rtn4rl2b          | 4126   | 3885   |
| chr3:si-busm1-118j2.5   | 12160  | 11535  |
| chr18:aars              | 54361  | 45347  |
| chr7:agxt2l1            | 3807   | 3709   |
| chr6:h1fx               | 15323  | 13537  |
| chr15:tmem195           | 5278   | 6017   |
| chr6:cish               | 7712   | 5787   |
| chr1:atp1a1a.2          | 16524  | 15250  |
| chr9:crygm2b            | 804    | 525    |
| chr6:scinla             | 30243  | 22222  |
| chr15:zgc-165502        | 2884   | 3038   |
| chr13:ubtd1             | 4989   | 4573   |
| chr8:atp2a2a            | 39163  | 41839  |
| chr9:ugt1a7             | 3593   | 3813   |
| chr22:zgc-114170        | 9951   | 9455   |
| chr4:cd36               | 23531  | 18771  |
| chr10:lim2.1            | 7515   | 5950   |
| chr20:zgc-153896        | 1286   | 1239   |
| chr15:mos               | 136    | 130    |
| chr18:si-ch211-200o3.4  | 5885   | 5479   |
| chr19:slc6a19a          | 17869  | 20537  |

|                         |        |        |
|-------------------------|--------|--------|
| chr3:junbl              | 22605  | 25488  |
| chr9:ugt1a4             | 3432   | 3627   |
| chr25:irf7              | 609    | 399    |
| chr19:grn1              | 4289   | 3098   |
| chr14:aldob             | 708644 | 549720 |
| chr8:dio1               | 2900   | 2266   |
| chr19:zgc-73075         | 53995  | 47278  |
| chr7:zgc-172079         | 4285   | 3786   |
| chr7:zgc-162132         | 61324  | 40080  |
| chr12:pde6c             | 60085  | 50804  |
| chr16:zgc-162301        | 2172   | 2103   |
| chr3:foxj1a             | 1165   | 922    |
| chr2:gadd45aa           | 2159   | 1766   |
| chr23:cyp2aa8           | 434    | 211    |
| chr5:xbp1               | 42283  | 38255  |
| chr14:nola1             | 7224   | 4906   |
| chr6:epha2              | 3188   | 2543   |
| chr7:faah2b             | 1415   | 1456   |
| chr1:zgc-103710         | 4681   | 3147   |
| chr3:zgc-110152         | 19282  | 15163  |
| chr7:serpine1           | 2816   | 2082   |
| chr21:rfesd             | 106    | 61     |
| chr7:gpt2               | 2284   | 1491   |
| chr7:slc12a10.2         | 5464   | 4774   |
| chr4:gys2               | 5883   | 4837   |
| chr25:cat               | 14801  | 13443  |
| chr10:si-ch73-46j18.5   | 8150   | 5510   |
| chr15:aldoca            | 3233   | 2641   |
| chr9:ugt1a5             | 3097   | 3295   |
| chr14:itln3             | 2112   | 576    |
| chr15:lim2.3            | 11192  | 9763   |
| chr21:zgc-55420         | 65236  | 76252  |
| chr22:si-ch211-284e20.8 | 2125   | 2103   |
| chr22:LOC563738         | 2087   | 1962   |
| chr4:zgc-123333         | 14881  | 11637  |
| chr9:hspd1              | 26036  | 19753  |
| chr6:angptl3            | 2621   | 1894   |
| chr5:LOC100003209       | 5397   | 4417   |
| chr12:zgc-136337        | 26540  | 30401  |
| chr20:hsp90a.2          | 18748  | 18183  |
| chr20:jun               | 32515  | 30508  |
| chr7:slc6a5             | 2708   | 2048   |
| chr8:zgc-63938          | 26491  | 32062  |
| chr7:lipc               | 1283   | 648    |
| chr9:ugt1a6             | 3012   | 3276   |
| chr19:si-ch211-105d11.2 | 3746   | 3108   |
| chr20:cx23              | 1712   | 1260   |
| chr11:pnpl4a            | 3651   | 2308   |
| chr9:ugt1a2             | 3109   | 3341   |
| chr22:zgc-195170        | 65     | 29     |
| chr21:slc23a1           | 1614   | 1718   |

|                        |        |        |
|------------------------|--------|--------|
| chr4:opn1sw1           | 84326  | 78609  |
| chr2:crfb16            | 2290   | 1295   |
| chr20:foxc1b           | 1716   | 1742   |
| chr22:he1b             | 74     | 32     |
| chr24:zgc-158823       | 1401   | 1266   |
| chr23:actl6b           | 527    | 405    |
| chr3:atf4b2            | 30839  | 26851  |
| chr8:cpox              | 873    | 658    |
| chr11:slc22a7a         | 3794   | 3039   |
| chr13:pygl             | 4907   | 4154   |
| chr4:si-dkey-31f5.1    | 5909   | 6176   |
| chr10:stc1l            | 2652   | 3426   |
| chr20:clu              | 10571  | 7684   |
| chr1:atp1a1a.4         | 162900 | 143876 |
| chr9:crygm3            | 252    | 159    |
| Zv9_NA583:zgc-56407    | 1100   | 775    |
| Zv9_NA965:zgc-91963    | 271    | 93     |
| chr15:cyp2y3           | 7281   | 7029   |
| chr5:hspb1             | 2767   | 2000   |
| chr10:alg5             | 3814   | 3282   |
| chr12:rangap1          | 1408   | 863    |
| chr11:zgc-92127        | 2912   | 2607   |
| chr5:zgc-153129        | 4661   | 2694   |
| chr25:igf2b            | 9711   | 6416   |
| chr21:cd74             | 464    | 345    |
| chr2:urod              | 1466   | 1132   |
| chr25:crabp1a          | 2534   | 1795   |
| chr8:LOC567547         | 5375   | 3780   |
| chr4:si-dkey-61p9.11   | 488    | 224    |
| chr6:ssb               | 5887   | 4175   |
| chr1:atp1a1a.3         | 12877  | 11145  |
| chr11:mafg2            | 1875   | 1639   |
| chr15:farsb            | 14496  | 11855  |
| chr12:mtr              | 5493   | 4355   |
| chr3:farsa             | 19821  | 17296  |
| chr20:prkchb           | 2249   | 1527   |
| chr5:zgc-175280        | 10340  | 9664   |
| chr7:cebpg             | 12369  | 11620  |
| chr3:gh1               | 2010   | 1423   |
| chr19:twist1a          | 1462   | 1413   |
| chr19:grnas            | 3574   | 2641   |
| chr3:zgc-55259         | 2405   | 1705   |
| chr19:cyt1             | 343036 | 335735 |
| chr2:si-ch211-195h23.3 | 1048   | 835    |
| chr3:gfer              | 1559   | 1322   |
| chr4:si-ch211-286m4.4  | 22398  | 18829  |
| chr15:tnfb             | 134    | 63     |
| chr19:fuca1            | 19047  | 12690  |
| chr4:zgc-162331        | 2390   | 2055   |
| chr16:fabp11b          | 209    | 94     |
| chr12:zgc-92040        | 1772   | 1857   |



|                         |        |        |
|-------------------------|--------|--------|
| chr25:pkm2b             | 135840 | 131503 |
| chr9:zgc-172053         | 204    | 268    |
| chr21:prlra             | 6011   | 4882   |
| chr9:stat4              | 1449   | 1129   |
| chr16:ndrg1l            | 22539  | 16211  |
| chr22:si-ch211-262h13.5 | 2345   | 2045   |
| chr25:anpep             | 11475  | 9492   |
| chr20:ttr               | 7222   | 5064   |
| chr12:slc16a9b          | 9625   | 8891   |
| chr14:zgc-195063        | 5223   | 5231   |
| chr8:qars               | 3450   | 2712   |
| chr2:zgc-153913         | 1493   | 1264   |
| chr3:phb                | 22293  | 15919  |
| chr23:smc1a             | 4397   | 3892   |
| chr3:pvalb5             | 6026   | 4136   |
| chr6:her6               | 2912   | 2228   |
| chr4:ipo8               | 8188   | 6000   |
| chr11:iars              | 63747  | 56869  |
| chr16:slc39a3           | 2883   | 2599   |
| chr5:hspa5              | 30573  | 24934  |
| chr16:crabp2a           | 967    | 745    |
| chr2:mknk2a             | 9351   | 8324   |
| chr20:cx28.9            | 5701   | 5415   |
| chr13:enpep             | 14211  | 12570  |
| chr5:ypel1              | 13187  | 11314  |
| chr1:fbxo8              | 7759   | 8343   |
| chr23:nr4a1             | 27336  | 18376  |
| chr23:sars              | 18394  | 12777  |
| chr25:cyp2x9            | 1624   | 1448   |
| chr4:itih2              | 21636  | 14729  |
| chr7:pfdn2              | 5698   | 4156   |
| Zv9_NA904:zgc-112265    | 23375  | 16392  |
| chr16:zgc-113232        | 9926   | 6008   |
| chr9:hao2               | 2843   | 2440   |
| chr18:si-dkey-24l11.1   | 3102   | 3438   |
| chr5:si-ch211-214j8.1   | 9845   | 8956   |
| Zv9_scaffold3485:bcmo1  | 4778   | 3781   |
| chr24:and1              | 28286  | 50842  |
| chr19:npvf              | 1029   | 736    |
| chr20:si-ch211-260g14.8 | 643    | 708    |
| chr21:c6                | 3121   | 2746   |
| chr21:slc8a4a           | 11968  | 10653  |
| chr3:hbae1              | 12129  | 8834   |
| chr12:myoz1b            | 34227  | 25744  |
| chr14:hspa9             | 36921  | 28748  |
| chr2:cahz               | 5641   | 3756   |
| chr20:si-dkey-7c18.24   | 31535  | 18513  |
| chr10:frem2a            | 4593   | 4570   |
| chr6:myl9               | 6243   | 5175   |
| chr9:wdr75              | 9481   | 6663   |
| chr23:nadl1.2           | 21172  | 16849  |

|                         |       |       |
|-------------------------|-------|-------|
| chr11:zgc-55406         | 82263 | 68194 |
| chr6:kbtbd12            | 17254 | 15164 |
| chr15:zgc-85932         | 12564 | 10744 |
| chr25:snrk1             | 19717 | 18255 |
| chr1:zgc-136908         | 30339 | 27810 |
| chr6:cxcr4a             | 466   | 444   |
| chr23:agmat             | 1818  | 1686  |
| chr2:rpb2b              | 1055  | 585   |
| chr7:zgc-153024         | 2619  | 2082  |
| chr25:ldhbb             | 10798 | 9780  |
| chr14:hars              | 18978 | 15033 |
| chr20:si-dkey-119m7.4   | 3241  | 3891  |
| chr3:kcnc3a             | 10324 | 10261 |
| chr18:miox              | 5995  | 4935  |
| chr20:cx32.3            | 3281  | 2904  |
| chr12:g6pca             | 4365  | 3028  |
| chr5:klf9               | 62613 | 62681 |
| chr17:si-ch211-214p16.2 | 639   | 492   |
| chr10:zgc-63505         | 1277  | 914   |
| chr19:abcf1             | 17873 | 14691 |
| chr13:slc2a15a          | 983   | 571   |
| chr1:slc34a2aas         | 4069  | 3870  |
| chr20:foxq1             | 3344  | 2340  |
| chr16:LOC559008         | 9072  | 6216  |
| chr16:vegfaa            | 761   | 590   |
| chr2:sec22ba            | 1100  | 887   |
| chr21:gabra1            | 13933 | 10244 |
| chr23:zgc-92113         | 9336  | 8518  |
| chr9:cdk5r2b            | 7228  | 6614  |
| chr21:bfbl              | 1026  | 654   |
| chr23:zgc-65788         | 2299  | 2237  |
| chr16:LOC555692         | 3354  | 2848  |
| chr12:si-dkeyp-94b4.2   | 534   | 522   |
| chr13:rhd               | 437   | 462   |
| chr25:zgc-158626        | 679   | 602   |
| chr10:zgc-111821        | 1211  | 1538  |
| chr11:zgc-110388        | 3658  | 2562  |
| chr22:si-dkey-19f23.2   | 1021  | 708   |
| chr14:ube2d2            | 3057  | 2635  |
| chr16:fbl               | 13760 | 9801  |
| chr13:LOC565375         | 2079  | 1624  |
| chr8:slc25a37           | 1233  | 1057  |
| chr7:grpel1             | 3226  | 2077  |
| chr1:cd99               | 2857  | 1882  |
| chr7:zgc-194993         | 623   | 759   |
| chr14:sqstm1            | 18349 | 13521 |
| chr1:zgc-171687         | 175   | 155   |
| chr17:zgc-123218        | 336   | 324   |
| chr1:ugt5b3             | 977   | 992   |
| chr7:cldn15a            | 3777  | 3635  |
| chr8:aldh9a1a           | 98333 | 82647 |

|                         |        |        |
|-------------------------|--------|--------|
| chr19:ncaldb            | 10861  | 9244   |
| chr12:ch25h             | 112    | 187    |
| chr17:coch              | 1892   | 1703   |
| chr8:lipg               | 8109   | 5317   |
| chr11:ace2              | 51146  | 47300  |
| chr9:mki67ip            | 3834   | 2356   |
| chr12:irf3              | 383    | 291    |
| chr13:prph2b            | 17327  | 15929  |
| chr8:LOC795445          | 395    | 257    |
| chr22:ahr1b             | 5170   | 4348   |
| chr23:krt18             | 65780  | 57258  |
| chr3:pppde2a            | 6618   | 5654   |
| chr11:gamt              | 137013 | 111888 |
| chr5:scn4bb             | 2127   | 1596   |
| chr2:zgc-136870         | 926    | 873    |
| chr6:rgs5a              | 5804   | 5075   |
| chr20:nus1              | 2795   | 2307   |
| chr23:si-dkey-205h13.1  | 12049  | 10401  |
| chr20:insm1a            | 4221   | 3551   |
| chr23:cyp2aa3           | 243    | 215    |
| chr3:ppan               | 4076   | 2848   |
| chr1:LOC567396          | 414    | 353    |
| chr20:rpl7l1            | 5233   | 3308   |
| chr20:si-ch211-121a2.2  | 5553   | 3987   |
| chr19:si-ch211-199g17.3 | 7777   | 8925   |
| chr7:zgc-113413         | 230    | 166    |
| chr4:e2f7               | 1047   | 619    |
| chr22:crb1              | 5479   | 4982   |
| chr3:zgc-112492         | 274    | 279    |
| Zv9_NA47:zgc-153034     | 1884   | 1489   |
| chr5:LOC559803          | 4200   | 3419   |
| chr17:capn3             | 73598  | 52733  |
| chr12:psme3             | 3489   | 2438   |
| chr16:lim2.5            | 5447   | 4593   |
| chr3:zgc-163083         | 938    | 562    |
| chr19:sox4a             | 44998  | 36705  |
| chr18:LOC565256         | 5511   | 4176   |
| chr10:nsun5             | 2429   | 1803   |
| chr23:tgm2              | 3715   | 3166   |
| chr16:wu-fb12e11        | 6161   | 4659   |
| chr11:trib3             | 20368  | 16651  |
| chr15:zgc-153766        | 1074   | 1044   |
| chr7:LOC100003911       | 223    | 169    |
| chr15:hspb6             | 3719   | 2630   |
| chr25:cpa4              | 40405  | 48742  |
| chr1:tmem41ab           | 5125   | 4615   |
| chr11:zgc-153788        | 1608   | 1451   |
| chr19:znrd1             | 301    | 220    |
| chr12:zgc-64213         | 2675   | 2219   |
| chr24:qtrtd1            | 997    | 904    |
| chr24:riok3             | 10850  | 7922   |

|                        |        |        |
|------------------------|--------|--------|
| chr23:acp1             | 2864   | 2370   |
| chr2:ifi30             | 4056   | 3529   |
| chr2:znfl2a            | 704    | 717    |
| chr11:optc             | 40     | 21     |
| chr24:abp1             | 10786  | 9295   |
| chr10:il1b             | 418    | 379    |
| chr15:sesn3            | 7026   | 5877   |
| chr2:zgc-110343        | 5025   | 3674   |
| chr21:grin1a           | 14768  | 13796  |
| chr6:zgc-162180        | 26     | 20     |
| chr10:hyou1            | 5427   | 3950   |
| chr22:gpd1b            | 10815  | 9230   |
| chr12:ppp4cb           | 6185   | 4381   |
| chr16:ca14             | 593    | 560    |
| chr25:arntl1a          | 2161   | 1504   |
| chr14:mtus1a           | 4029   | 3649   |
| chr2:dpyd              | 16712  | 14793  |
| chr18:plcg2            | 1096   | 1036   |
| chr2:proc              | 2051   | 1710   |
| chr25:cyp19a1b         | 425    | 245    |
| chr8:gadd45g           | 8818   | 6454   |
| Zv9_NA986:exorh        | 1582   | 1547   |
| chr20:paics            | 12446  | 7595   |
| chr20:ctgf             | 17180  | 17769  |
| chr16:sult2st3         | 658    | 486    |
| chr11:nfasca           | 11855  | 9266   |
| chr3:zgc-114180        | 2613   | 1958   |
| chr1:zgc-153443        | 6383   | 5748   |
| chr18:synm             | 13563  | 12344  |
| chr16:rbp1a            | 2846   | 2061   |
| chr18:si-ch211-203b8.5 | 19911  | 15347  |
| chr6:zgc-103559        | 897    | 998    |
| chr23:cyp2aa1          | 2177   | 1939   |
| chr8:creb3l3l          | 16927  | 15069  |
| chr13:abcc2            | 51682  | 52284  |
| chr16:tubb5            | 18307  | 14526  |
| chr2:zgc-63882         | 1652   | 1250   |
| chr11:zgc-92804        | 15042  | 14108  |
| chr21:chchd10          | 5856   | 5341   |
| chr1:anp32b            | 11757  | 7631   |
| chr13:acta1b           | 118076 | 93757  |
| chr2:zgc-86776         | 3160   | 2262   |
| chr23:abcg2a           | 35938  | 35385  |
| chr5:dao.1             | 263    | 172    |
| chr15:zgc-153310       | 1677   | 1601   |
| chr2:foxc1a            | 3016   | 3005   |
| chr9:cbsb              | 14343  | 13497  |
| chr16:crot             | 4272   | 3675   |
| chr21:hspa4a           | 10938  | 7989   |
| chr23:zgc-92085        | 428    | 447    |
| chr21:cryba1b          | 493468 | 362842 |

|                       |        |       |
|-----------------------|--------|-------|
| chr19:LOC797776       | 1013   | 1062  |
| chr10:sardh           | 4670   | 4093  |
| chr7:prmt3            | 5663   | 4284  |
| chr10:arr3l           | 100896 | 71732 |
| chr17:syncrpl         | 8110   | 6414  |
| chr2:cldn11a          | 3647   | 3549  |
| chr2:prmt5            | 4693   | 3265  |
| chr9:zgc-92380        | 9083   | 10875 |
| Zv9_NA897:tfr2        | 2759   | 2648  |
| chr19:lim2.4          | 42908  | 38350 |
| chr8:mhc2dab          | 102    | 113   |
| chr14:loxl3a          | 972    | 1344  |
| chr21:nhp2            | 3309   | 2678  |
| chr21:zgc-172158      | 1159   | 971   |
| chr15:zgc-63663       | 126654 | 86774 |
| chr21:irf11           | 2324   | 2718  |
| chr13:sar1a           | 3373   | 2519  |
| chr5:ufc1             | 967    | 794   |
| chr5:zgc-86715        | 114    | 100   |
| chr8:gpd1a            | 8119   | 6494  |
| chr9:crygm5           | 1832   | 1285  |
| chr8:uck2a            | 2636   | 1983  |
| chr7:zgc-174689       | 218    | 147   |
| chr6:lepr             | 5151   | 4079  |
| chr16:ceacam1         | 13607  | 14802 |
| chr16:onecutl         | 3289   | 3236  |
| chr13:cnih            | 4719   | 3464  |
| chr9:slc10a2          | 7705   | 7007  |
| chr2:LOC100005645     | 841    | 750   |
| chr5:imp4             | 1724   | 1209  |
| chr19:bop1            | 10298  | 7861  |
| chr12:eif2ak1         | 3092   | 2225  |
| chr20:zgc-175221      | 9112   | 6293  |
| chr11:gnl3            | 11314  | 9184  |
| chr17:zgc-153417      | 4782   | 4014  |
| chr10:arrdc3b         | 37842  | 29298 |
| chr19:twistnb         | 2952   | 2956  |
| chr3:zgc-194125       | 572    | 527   |
| chr20:si-dkey-263b2.1 | 1513   | 1145  |
| chr20:sirt5           | 3120   | 2628  |
| chr19:mllt11          | 21637  | 15809 |
| chr7:eif3jb           | 5858   | 4209  |
| chr6:ctsz             | 12500  | 9857  |
| chr13:itrip           | 604    | 376   |
| chr3:zgc-152911       | 1135   | 1523  |
| chr3:arl5c            | 4611   | 4805  |
| chr14:chrnb3b         | 506    | 500   |
| chr10:elovl7b         | 4477   | 4754  |
| chr11:rpf1            | 1835   | 1034  |
| chr5:LOC791600        | 590    | 523   |
| chr23:nmnat1          | 4759   | 2869  |

|                         |       |       |
|-------------------------|-------|-------|
| chr14:glra1             | 4928  | 3994  |
| chr6:utp6               | 4459  | 3133  |
| chr12:pts               | 6123  | 7019  |
| chr19:si-ch211-195b13.1 | 37172 | 30612 |
| chr3:MGC173646          | 3282  | 2818  |
| chr6:vdrb               | 8523  | 7727  |
| chr23:srm               | 1574  | 1199  |
| chr11:zgc-174354        | 2587  | 1936  |
| chr8:par1               | 411   | 324   |
| chr3:LOC798075          | 948   | 932   |
| chr24:zgc-172225        | 717   | 806   |
| chr7:LOC100151549       | 4     | 1     |
| chr23:atp2b3b           | 34077 | 28369 |
| chr10:lox               | 1306  | 1401  |
| chr23:acvr1             | 3796  | 3281  |
| chr12:itga3b            | 4256  | 4234  |
| chr9:itgb1              | 3542  | 3311  |
| chr16:rbfox1l           | 17164 | 16654 |
| chr21:guca1d            | 273   | 316   |
| chr5:sik2a              | 3188  | 2537  |
| chr4:pparaa             | 6548  | 7616  |
| chr11:zgc-162816        | 827   | 943   |
| chr24:csrnp1b           | 19546 | 16950 |
| chr8:zgc-100919         | 19841 | 13829 |
| chr20:c6orf115          | 1810  | 991   |
| chr16:zgc-92912         | 2007  | 1879  |
| chr2:itm2cb             | 11603 | 9331  |
| chr14:cpeb4             | 5194  | 4330  |
| chr17:zgc-136872        | 1504  | 1494  |
| chr23:zgc-174907        | 2260  | 1608  |
| chr4:sema3aa            | 12657 | 10889 |
| chr7:ache               | 35065 | 28150 |
| chr13:zgc-153911        | 694   | 544   |
| chr20:gata4             | 1334  | 2073  |
| chr20:acbd3             | 2077  | 1678  |
| chr22:nbl1              | 3691  | 4547  |
| chr21:st6gal1           | 3960  | 2970  |
| chr10:dgat2             | 10551 | 11447 |
| chr15:cryba1a           | 4193  | 4214  |
| chr16:epb41             | 1754  | 1444  |
| chr21:vtnb              | 5894  | 4652  |
| chr11:gata1a            | 447   | 410   |
| chr8:LOC100001681       | 2669  | 2530  |
| chr5:tsc1a              | 12455 | 10562 |
| chr24:si-ch211-234p6.13 | 710   | 792   |
| chr12:zgc-172248        | 1925  | 1421  |
| chr12:heatr1            | 9459  | 8702  |
| chr7:aqp9b              | 15816 | 12358 |
| chr7:tm4sf5             | 2180  | 1987  |
| chr20:akirin2           | 9127  | 8301  |
| chr6:rheb               | 3846  | 2924  |

|                          |       |       |
|--------------------------|-------|-------|
| chr14:gria3b             | 6039  | 4971  |
| chr13:kmo                | 3747  | 3029  |
| chr4:fbxl14b             | 5098  | 4535  |
| chr8:cldn5a              | 3166  | 3069  |
| chr3:ifnphi1             | 14    | 15    |
| chr20:stxbp5a            | 9618  | 8113  |
| chr3:znf750              | 1141  | 784   |
| chr21:zgc-171765         | 7218  | 5850  |
| chr19:zgc-101594         | 1411  | 975   |
| chr24:plod2              | 2700  | 1780  |
| chr15:scn4ba             | 3238  | 2357  |
| chr7:slc1a1              | 7066  | 5822  |
| chr3:srebf1              | 36145 | 41762 |
| chr9:hspe1               | 6361  | 4243  |
| chr21:nop16              | 2025  | 2001  |
| chr8:si-dkeyp-22b2.3     | 1489  | 1254  |
| chr19:si-ch211-246f9.1   | 11122 | 9733  |
| Zv9_scaffold3460:pcyt1bb | 798   | 763   |
| chr11:zgc-153665         | 1645  | 1275  |
| Zv9_NA891:zgc-91957      | 5883  | 4065  |
| chr10:sec31a             | 10452 | 11064 |
| chr11:rrp9               | 3937  | 3103  |
| chr2:si-ch211-235o23.1   | 3176  | 2596  |
| chr10:zgc-101565         | 35369 | 22946 |
| chr5:gna14               | 877   | 587   |
| chr10:nrarpa             | 6053  | 4544  |
| chr25:rag1               | 1749  | 938   |
| chr4:drd4-rs             | 956   | 1094  |
| chr12:slc4a1b            | 951   | 814   |
| chr2:arf1                | 6383  | 5329  |
| chr5:tagln3a             | 4698  | 4453  |
| chr21:slc7a3             | 44616 | 35410 |
| chr8:ifrd2               | 6709  | 5460  |
| chr19:hax1               | 3503  | 1982  |
| chr7:zgc-136220          | 91660 | 67128 |
| chr25:zgc-113028         | 12914 | 10055 |
| chr6:scn8ab              | 12406 | 9256  |
| chr10:il6st              | 9031  | 7150  |
| chr19:atpif1             | 13451 | 10390 |
| chr3:phospho1            | 613   | 428   |
| chr8:pim1                | 2070  | 1332  |
| chr13:mcmbp              | 4621  | 3150  |
| chr2:scp2                | 19425 | 21071 |
| chr25:btbd10a            | 11726 | 10015 |
| chr17:zgc-65772          | 10817 | 11402 |
| chr18:nip7               | 2474  | 1892  |
| chr14:zgc-136449         | 1025  | 816   |
| chr21:rbmx2              | 757   | 931   |
| chr9:dap1b               | 4857  | 4019  |
| chr8:zgc-158415          | 3530  | 2865  |
| chr14:wdr1               | 38473 | 35746 |

|                        |        |        |
|------------------------|--------|--------|
| chr12:nhp211           | 6181   | 3892   |
| chr6:ttc4              | 1264   | 924    |
| chr21:si-rp71-1p14.10  | 2949   | 2405   |
| chr5:zgc-86811         | 2474   | 1685   |
| chr10:npm1             | 25735  | 20077  |
| chr3:socs1             | 2176   | 1328   |
| chr11:snrpe            | 2360   | 1177   |
| chr2:si-ch211-284o19.6 | 122    | 150    |
| chr7:exosc6            | 1385   | 1166   |
| chr2:cnn2              | 7546   | 6940   |
| chr16:adcyl            | 13002  | 12373  |
| chr25:zgc-112242       | 1399   | 1077   |
| chr8:rps8b             | 1920   | 1398   |
| chr5:zgc-114142        | 10428  | 7840   |
| chr21:bxdc2            | 8953   | 7309   |
| chr19:atxn1a           | 8421   | 7669   |
| chr10:zgc-92611        | 5357   | 3365   |
| chr12:ghitm            | 22435  | 26607  |
| chr11:ddx49            | 2155   | 1520   |
| chr15:scn2b            | 6522   | 5770   |
| chr14:arhgef9          | 2725   | 2380   |
| chr14:smyd5            | 1196   | 800    |
| chr11:ptp4a1           | 19386  | 14183  |
| chr7:zgc-194686        | 66     | 62     |
| chr13:polr1c           | 2030   | 1267   |
| chr22:capn2l           | 2083   | 1479   |
| chr3:zgc-173594        | 237    | 114    |
| chr19:col11a2          | 20210  | 18487  |
| chr3:baxa              | 4355   | 3340   |
| chr16:zgc-162150       | 448    | 490    |
| chr5:zgc-172163        | 1392   | 946    |
| chr2:crygn1            | 4059   | 2614   |
| chr17:zgc-153612       | 1988   | 1546   |
| chr13:cyp17a1          | 878    | 600    |
| chr18:sema3ab          | 5264   | 4192   |
| chr13:si-dkey-47e6.1   | 7032   | 6661   |
| chr8:si-ch211-106g4.2  | 9457   | 8547   |
| chr12:abca5            | 7855   | 6656   |
| chr23:pacsin1a         | 10572  | 9594   |
| chr9:cryba2b           | 172543 | 121018 |
| chr21:hspb11           | 5096   | 3791   |
| chr7:f2                | 13275  | 9962   |
| chr20:hlx1             | 1098   | 987    |
| chr15:phkg1a           | 2943   | 1892   |
| chr20:si-dkey-14a7.1   | 231    | 148    |
| chr5:LOC567653         | 69     | 40     |
| chr14:adrb2a           | 798    | 741    |
| chr21:oxct1b           | 4381   | 3185   |
| chr3:si-busm1-163l24.4 | 321    | 208    |
| chr17:lpin1            | 90456  | 80127  |
| chr16:abcb4            | 20500  | 18333  |



|                       |        |        |
|-----------------------|--------|--------|
| chr18:LOC566572       | 4186   | 3836   |
| chr17:sox11a          | 12869  | 8657   |
| chr10:thop1           | 1116   | 846    |
| chr23:cyp2aa3v1       | 165    | 162    |
| chr21:rnmt1b          | 1234   | 648    |
| chr15:zgc-63694       | 2010   | 2284   |
| chr11:zgc-92474       | 6784   | 7335   |
| chr14:zgc-174917      | 1849   | 2438   |
| chr25:prmt7           | 4273   | 3626   |
| chr2:ebna1bp2l        | 2435   | 1929   |
| chr19:brp16           | 1459   | 1183   |
| chr24:ezh2            | 2994   | 1808   |
| chr7:slc39a1          | 1560   | 1257   |
| chr1:atp1a1a.5        | 4277   | 3652   |
| chr16:lingo4b         | 3647   | 3191   |
| chr21:dolpp1          | 2567   | 2181   |
| chr5:zgc-100933       | 6245   | 4472   |
| chr22:camk1g          | 17971  | 17299  |
| chr11:scarb1          | 4696   | 3857   |
| chr13:st3gal5l        | 3121   | 2854   |
| chr11:mapkapk3        | 2041   | 1618   |
| chr13:LOC570267       | 3229   | 2108   |
| chr1:esf1             | 8306   | 6736   |
| chr24:idi1            | 4733   | 3122   |
| chr9:crygm2d3         | 53442  | 35082  |
| chr14:hnrnpa0l        | 8060   | 6411   |
| chr5:anxa1b           | 1754   | 1132   |
| chr6:zgc-171476       | 4417   | 4122   |
| chr12:aldoab          | 207280 | 180574 |
| chr17:dvr1            | 589    | 297    |
| chr14:zgc-65749       | 4354   | 4130   |
| chr3:cyp2k22          | 17     | 2      |
| chr17:fabp7a          | 15147  | 9997   |
| chr12:acsf2           | 4014   | 3534   |
| chr3:maf1             | 515    | 467    |
| chr7:drd4b            | 568    | 403    |
| chr8:si-dkey-190g11.3 | 318    | 189    |
| chr19:vamp1           | 8598   | 6917   |
| chr20:zgc-92851       | 1342   | 1306   |
| chr18:myo7aa          | 4317   | 3179   |
| chr20:cx35            | 1901   | 1761   |
| chr15:bbc3            | 7407   | 6558   |
| chr12:zgc-171485      | 1467   | 1319   |
| chr23:dhrs3a          | 4155   | 2715   |
| chr11:opn1sw2         | 18438  | 17508  |
| chr18:arf5            | 13471  | 11180  |
| chr19:ctps            | 6388   | 4738   |
| chr9:mao              | 14073  | 12266  |
| chr4:nudt5            | 2213   | 1661   |
| chr3:xpo6             | 13127  | 11656  |
| chr21:dkc1            | 10959  | 9109   |

|                      |        |        |
|----------------------|--------|--------|
| chr3:polr3k          | 408    | 265    |
| chr22:pdcd4b         | 31255  | 29912  |
| chr3:pvalb6          | 5409   | 4185   |
| chr14:acsl4a         | 13698  | 12476  |
| chr7:f13a1           | 2648   | 3365   |
| chr23:lmnl3          | 455    | 455    |
| chr5:grk1b           | 2913   | 2283   |
| chr15:abcg4b         | 243    | 62     |
| chr13:eif4e1c        | 3456   | 2096   |
| chr4:zgc-171553      | 4937   | 4856   |
| chr13:polr1b         | 5650   | 4563   |
| chr5:ddx54           | 20122  | 19110  |
| chr18:rbm28          | 6890   | 5620   |
| chr7:c1qtnf4         | 12141  | 9613   |
| chr2:agl             | 24040  | 22428  |
| chr1:nxn1            | 627    | 548    |
| chr11:zgc-110655     | 26092  | 26834  |
| chr1:fabp2           | 21658  | 16118  |
| chr5:surf6           | 1948   | 1647   |
| chr18:dtwd1          | 3024   | 2571   |
| chr5:arcn1           | 5651   | 4233   |
| chr24:rrs1           | 2803   | 2280   |
| chr5:f2r             | 323    | 361    |
| chr5:LOC562345       | 3247   | 2516   |
| chr22:aspn           | 1086   | 1084   |
| chr4:ascl1a          | 1320   | 996    |
| chr22:gpx4a          | 24672  | 17286  |
| chr19:snrpd1         | 4049   | 2515   |
| chr1:pdcd11          | 20149  | 15606  |
| chr1:cyp3a65         | 121891 | 104688 |
| chr2:si-dkeyp-73d8.9 | 464    | 353    |
| chr4:myf5            | 395    | 317    |
| chr14:lygl1          | 3001   | 2660   |
| chr23:LOC100149863   | 172    | 147    |
| chr3:zgc-55558       | 5218   | 3529   |
| Zv9_NA712:slco1d1    | 9806   | 8095   |
| chr9:zgc-158619      | 3874   | 4128   |
| chr4:magi2           | 4219   | 3637   |
| chr7:oaz2b           | 4686   | 3129   |
| chr9:frzb            | 1320   | 1139   |
| chr4:pmpcb           | 11194  | 10821  |
| chr15:slc25a15a      | 774    | 720    |
| chr3:kri1l           | 2732   | 1983   |
| chr4:ms4a17a.16      | 260    | 268    |
| chr11:zgc-101030     | 1179   | 873    |
| chr6:zgc-63759       | 3805   | 4645   |
| chr25:rlbp1b         | 12941  | 8659   |
| chr9:nlgn4a          | 3440   | 3101   |
| chr19:sdcc2          | 13129  | 9132   |
| chr11:gadd45ba       | 38352  | 34674  |
| chr4:hspa14          | 6551   | 5233   |

|                       |        |        |
|-----------------------|--------|--------|
| chr7:zgc-101653       | 8456   | 7420   |
| chr21:noc4l           | 3382   | 2861   |
| chr18:cirh1a          | 13249  | 10423  |
| chr1:exosc9           | 1167   | 826    |
| chr17:dio2            | 422    | 330    |
| chr5:msna             | 12306  | 10487  |
| chr17:egln3           | 144    | 138    |
| chr14:cryba1l         | 466440 | 357847 |
| chr19:si-dkey-218l8.1 | 29891  | 25359  |
| chr9:crygm2d11        | 51525  | 38999  |
| chr7:nrn1lb           | 3283   | 2817   |
| chr1:sid4             | 15390  | 14724  |
| chr1:zgc-101859       | 16934  | 14875  |
| chr3:prmt1            | 22062  | 14864  |
| chr24:abca4a          | 1272   | 984    |
| chr24:zgc-65861       | 86705  | 91043  |
| chr8:dnttip2          | 14486  | 10685  |
| chr3:wnt9b            | 993    | 1225   |
| chr16:cdkal1          | 5412   | 5033   |
| chr8:gck              | 143    | 83     |
| chr22:shc2            | 3480   | 2659   |
| chr24:pdss1           | 3991   | 2991   |
| chr5:riok2            | 5911   | 4704   |
| chr11:rab43           | 2122   | 1407   |
| chr5:ca4a             | 3180   | 2857   |
| chr2:dpp6             | 12019  | 10424  |
| chr2:loxl5b           | 150    | 114    |
| chr7:LOC570613        | 1609   | 1385   |
| chr6:ppig             | 3140   | 2632   |
| chr14:foxi3b          | 1666   | 1677   |
| chr7:kars             | 54881  | 37214  |
| chr9:kdelc1           | 645    | 485    |
| chr6:pde6h            | 99744  | 87267  |
| chr18:hipk2           | 29313  | 30730  |
| chr9:sp9              | 2475   | 2727   |
| chr6:atf4b1           | 75537  | 70355  |
| chr12:crygmxl2        | 191407 | 169182 |
| chr16:LOC100005476    | 3371   | 2318   |
| chr21:nup98           | 25797  | 19795  |
| chr1:abcg2b           | 1253   | 933    |
| chr10:cryba4          | 300462 | 194288 |
| chr24:myo3a           | 5063   | 4245   |
| chr13:c1d             | 1119   | 946    |
| chr23:tcf21           | 249    | 173    |
| chr16:alg2            | 1314   | 982    |
| chr9:satb2            | 3036   | 2861   |
| chr13:zgc-110784      | 657    | 615    |
| chr17:zgc-162913      | 3512   | 3361   |
| chr9:mxc              | 249    | 213    |
| chr4:ms4a17a.11       | 2847   | 2170   |
| chr13:agt             | 25035  | 15515  |

|                        |       |       |
|------------------------|-------|-------|
| chr5:zgc-101016        | 925   | 852   |
| chr4:lta4h             | 7381  | 6532  |
| chr2:zgc-153593        | 1974  | 1090  |
| chr8:si-busm1-266f07.1 | 107   | 115   |
| chr8:zgc-123077        | 107   | 115   |
| chr8:zgc-152682        | 107   | 115   |
| chr24:anxa13           | 9951  | 6636  |
| chr11:LOC561073        | 1683  | 1484  |
| chr5:anxa1a            | 29600 | 25219 |
| chr4:aebp2             | 5110  | 3672  |
| chr4:dnajc2            | 2521  | 2128  |
| chr5:si-ch211-225b11.1 | 2617  | 2046  |
| chr1:lrrc58a           | 1514  | 1622  |
| chr2:zgc-101744        | 7304  | 5692  |
| chr20:si-dkey-34f16.5  | 590   | 478   |
| chr24:mybpc2b          | 20589 | 19401 |
| chr14:zgc-77938        | 2667  | 2707  |
| chr6:smx5              | 1703  | 1162  |
| chr5:zgc-65851         | 17959 | 15342 |
| chr5:dpagt1            | 2311  | 1937  |
| chr13:LOC797799        | 111   | 116   |
| chr24:lrrc30           | 3007  | 1847  |
| chr21:gsdf             | 375   | 374   |
| chr13:zbtb8os          | 1730  | 1280  |
| chr8:gmat2             | 37516 | 30354 |
| chr6:accn4b            | 974   | 891   |
| chr20:si-dkey-217m5.3  | 55    | 25    |
| chr12:chad             | 4060  | 2561  |
| chr17:slc8a1b          | 10666 | 7585  |
| chr21:zgc-85869        | 1902  | 1175  |
| chr16:gnrhr3           | 365   | 419   |
| chr2:rgs5b             | 955   | 609   |
| chr20:si-dkeyp-95d10.1 | 3302  | 3125  |
| chr9:idh1              | 19196 | 17643 |
| chr22:ncl1             | 10338 | 8488  |
| chr8:si-busm1-160c18.6 | 62    | 32    |
| chr16:grwd1            | 6128  | 4752  |
| chr16:rrp15            | 3314  | 2801  |
| chr22:zgc-92479        | 25246 | 23906 |
| chr10:cadm2a           | 6906  | 5621  |
| chr9:dhrs9             | 7374  | 5629  |
| chr14:zgc-113138       | 1270  | 964   |
| chr2:rpp40l            | 986   | 732   |
| chr9:pcbp3             | 8505  | 6986  |
| chr15:kcnj13           | 2793  | 2082  |
| chr19:zgc-123347       | 2764  | 2722  |
| chr6:aldh1l1           | 7881  | 6603  |
| chr20:zgc-86709        | 3622  | 2274  |
| chr3:sgsm3             | 9289  | 7393  |
| chr8:si-ch211-133l5.7  | 3156  | 2585  |
| chr4:zgc-76871         | 8267  | 7664  |

|                       |       |       |
|-----------------------|-------|-------|
| chr7:plekhf1          | 2113  | 1556  |
| chr12:adkb            | 4939  | 3675  |
| chr12:zfp438          | 2655  | 2036  |
| chr22:cry4            | 3395  | 3308  |
| chr5:nova1            | 12670 | 12843 |
| chr7:lgi2a            | 1451  | 1078  |
| chr17:npy4r           | 215   | 209   |
| chr9:gpr39            | 16290 | 20864 |
| chr21:zgc-101768      | 3609  | 2734  |
| chr15:LOC100002553    | 265   | 232   |
| chr10:per1a           | 36275 | 32250 |
| chr18:utp15           | 6347  | 5674  |
| chr5:nono             | 12006 | 9105  |
| chr21:tnfrsfa         | 3461  | 2941  |
| chr1:cep97            | 5033  | 4939  |
| chr10:znf259          | 2522  | 1835  |
| chr18:ugt5c3          | 705   | 505   |
| chr12:irf9            | 1275  | 1067  |
| chr24:tgif1           | 6944  | 5943  |
| chr19:slc6a18         | 3792  | 3561  |
| chr4:srgap2b          | 6693  | 5885  |
| chr9:acmsd            | 2134  | 1961  |
| chr5:LOC555453        | 19    | 12    |
| chr5:cyr6111          | 909   | 648   |
| chr17:dtnc            | 6586  | 4903  |
| chr9:ddx18            | 11349 | 8662  |
| chr1:mtp              | 6356  | 6426  |
| chr1:klf3             | 14441 | 14651 |
| chr9:LOC100007315     | 3089  | 2508  |
| chr10:por             | 12273 | 8538  |
| chr5:gria3a           | 19048 | 16269 |
| chr14:zgc-112531      | 2908  | 2297  |
| chr25:lamb4           | 5571  | 7624  |
| chr2:ccdc24           | 1504  | 1184  |
| chr25:LOC567595       | 12592 | 10059 |
| chr3:hsd3b7           | 5581  | 4770  |
| chr22:si-dkey-110c1.7 | 10446 | 8087  |
| chr9:si-dkey-18p12.4  | 62    | 27    |
| chr1:mb               | 13922 | 12702 |
| chr16:osr2            | 7700  | 8972  |
| chr14:arl3l2          | 1502  | 1358  |
| chr19:tomm40l         | 3722  | 2475  |
| chr2:prpf38b          | 7458  | 5896  |
| chr12:zgc-174622      | 920   | 654   |
| chr16:s100a10b        | 6735  | 4756  |
| chr15:rab34           | 726   | 405   |
| chr23:psmb6           | 14885 | 14722 |
| chr20:cyp46a1         | 153   | 130   |
| chr23:cacnb3a         | 1902  | 1392  |
| chr5:rhobtb2a         | 6337  | 5462  |
| chr13:zgc-101581      | 886   | 551   |

|                        |       |       |
|------------------------|-------|-------|
| chr3:LOC797939         | 12236 | 11968 |
| chr5:map1b             | 6162  | 4483  |
| chr23:cyp2aa2          | 358   | 236   |
| chr12:zgc-64114        | 26800 | 28510 |
| chr5:zgc-194261        | 6442  | 5883  |
| chr9:zgc-66484         | 2768  | 2178  |
| chr25:pus7             | 14130 | 12969 |
| chr6:sec23b            | 35912 | 32957 |
| chr3:zgc-56066         | 1993  | 1867  |
| chr12:maff             | 9616  | 9939  |
| chr17:zgc-158781       | 577   | 413   |
| chr19:rbm24a           | 4830  | 6185  |
| chr20:plg              | 35810 | 31607 |
| chr12:skap1            | 419   | 232   |
| chr8:mak16             | 4427  | 3313  |
| chr11:ipo9             | 7498  | 5930  |
| chr11:tp53rk           | 2059  | 1633  |
| chr17:prox1            | 10156 | 8594  |
| chr14:zgc-110652       | 2060  | 1271  |
| chr18:st3gal2          | 1298  | 1238  |
| chr1:zgc-103570        | 4745  | 4261  |
| chr17:disp2            | 6279  | 4918  |
| chr21:ccdc55           | 1739  | 2130  |
| chr23:zgc-158791       | 4985  | 4672  |
| chr1:nr3c2             | 1921  | 1780  |
| chr16:rcc1             | 1807  | 1145  |
| chr14:zgc-101609       | 861   | 556   |
| chr5:foxd1l            | 1346  | 1510  |
| chr1:lias              | 2321  | 1818  |
| chr7:zgc-136860        | 3515  | 3496  |
| chr9:si-ch211-235e18.3 | 55550 | 48807 |
| chr22:kng1             | 10203 | 8360  |
| chr13:capn1a           | 7725  | 5498  |
| chr22:zgc-77082        | 1457  | 1503  |
| chr23:abce1            | 38455 | 29916 |
| chr8:zgc-113183        | 1411  | 739   |
| chr2:si-ch211-122l24.4 | 37    | 11    |
| chr6:eif2s2            | 29602 | 24045 |
| chr16:hmg2             | 31254 | 25101 |
| chr12:zgc-171978       | 464   | 457   |
| chr8:mapkap2b          | 215   | 208   |
| chr10:nle1             | 3617  | 3126  |
| chr1:polr1e            | 3232  | 1805  |
| chr4:copg2             | 26164 | 23215 |
| chr16:dyrk1b           | 35662 | 35429 |
| chr9:slc25a6           | 3924  | 2946  |
| chr16:bcam             | 5107  | 4141  |
| chr13:si-ch211-117n7.7 | 713   | 688   |
| chr22:hsd11b3a         | 2334  | 1736  |
| chr8:rimkla            | 51167 | 47895 |
| chr7:zgc-172065        | 223   | 178   |

|                        |       |       |
|------------------------|-------|-------|
| chr5:EIF2B1            | 511   | 267   |
| chr1:ZGC-111983        | 47104 | 37226 |
| chr3:SEPW2B            | 5121  | 2341  |
| chr25:ZGC-112084       | 3513  | 2750  |
| chr8:PIWIL1            | 2086  | 1670  |
| chr5:SI-CH211-102C2.6  | 6604  | 5845  |
| chr17:SRP14            | 2031  | 1512  |
| chr19:SLC9A3.2         | 1958  | 1792  |
| chr8:ULK1A             | 10854 | 7758  |
| chr2:ZGC-92406         | 876   | 775   |
| chr21:ATP2A2B          | 23974 | 19298 |
| chr2:OPRK1             | 1283  | 1213  |
| chr19:MRPS18B          | 2123  | 1654  |
| chr17:ZGC-193593       | 4897  | 5341  |
| chr19:SI-CH211-30B16.2 | 2257  | 1930  |
| chr20:WU-FC14H06       | 279   | 193   |
| chr22:ZGC-113397       | 124   | 135   |
| chr8:DMT1L             | 1482  | 1078  |
| chr11:PPARG            | 7013  | 8070  |
| chr12:TCTB             | 384   | 270   |
| chr3:CLDNI             | 18487 | 19577 |
| chr20:CYP2P8           | 1803  | 1635  |
| chr3:ZGC-171753        | 27311 | 21114 |
| chr23:ZGC-194314       | 225   | 92    |
| chr6:ZGC-158429        | 1816  | 1511  |
| chr2:PTH1RA            | 917   | 661   |
| chr21:PCSK1            | 17302 | 15818 |
| chr3:AQP8B             | 17    | 30    |
| chr7:ZGC-172109        | 1     | 0     |
| chr1:ZGC-56382         | 39705 | 31746 |
| chr22:FREM1B           | 4620  | 3437  |
| chr5:GTF3AA            | 2831  | 2121  |
| chr9:ZGC-165347        | 24827 | 20211 |
| chr14:PROM1A           | 7905  | 7020  |
| chr8:FXN               | 718   | 649   |
| chr8:SI-DKEY-46A10.3   | 3611  | 2584  |
| chr19:S100S            | 3077  | 2786  |
| chr1:PPWP2H            | 5324  | 4066  |
| chr2:ZGC-154086        | 719   | 528   |
| chr9:ZGC-91818         | 3747  | 2923  |
| chr10:ZGC-136807       | 2444  | 1937  |
| chr12:NGFR1            | 472   | 436   |
| chr18:WNT2             | 926   | 894   |
| chr19:NFE2L3           | 2562  | 1808  |
| chr1:TECRB             | 14637 | 11824 |
| chr2:EIF2B3            | 4637  | 3526  |
| chr6:AGXTA             | 6091  | 5203  |
| chr19:ZGC-153384       | 12468 | 12698 |
| chr5:LOC796505         | 5187  | 4965  |
| chr24:ZGC-110852       | 1571  | 1274  |
| chr3:SLC5A11           | 3363  | 3328  |

|                        |       |       |
|------------------------|-------|-------|
| chr8:slc5a9            | 801   | 952   |
| chr5:pho               | 2050  | 1610  |
| chr10:nfil3            | 8700  | 7024  |
| chr10:samsn1b          | 3037  | 2470  |
| chr19:ntla             | 2626  | 1800  |
| chr7:zgc-194626        | 59    | 50    |
| chr14:fgfr1b           | 2993  | 3273  |
| chr20:glrx5            | 3221  | 2254  |
| chr18:si-dkey-103i16.6 | 1964  | 1538  |
| chr8:kcnn1             | 1091  | 937   |
| chr20:si-dkey-19f21.3  | 799   | 759   |
| chr17:gale             | 1860  | 1475  |
| chr20:zgc-171525       | 6128  | 7057  |
| chr5:si-ch211-89f7.1   | 1967  | 1984  |
| chr21:camk2a           | 7754  | 5898  |
| chr12:pth1rb           | 795   | 558   |
| chr18:ssr3             | 1726  | 956   |
| chr2:si-ch211-71m22.3  | 89    | 37    |
| chr20:zgc-112104       | 7094  | 5173  |
| chr9:zgc-113314        | 261   | 178   |
| chr8:mobkl2a           | 2719  | 1998  |
| chr21:rars             | 14516 | 10605 |
| chr5:homer1            | 2089  | 1875  |
| chr3:tob1a             | 76141 | 64384 |
| chr22:zgc-56533        | 1893  | 1398  |



| VD-3 in experiment 2 | VD-1 in experiment 1 | VD-2 in experiment 1 |
|----------------------|----------------------|----------------------|
| 789                  | 11654                | 13963                |
| 524                  | 2194                 | 1322                 |
| 257                  | 3041                 | 3753                 |
| 731                  | 3771                 | 4302                 |
| 12                   | 429                  | 1818                 |
| 4442                 | 14523                | 13502                |
| 17685                | 8000                 | 3854                 |
| 43976                | 10485                | 8714                 |
| 67629                | 18165                | 15419                |
| 1355                 | 4552                 | 4775                 |
| 983                  | 4337                 | 4271                 |
| 330855               | 71558                | 38537                |
| 8896                 | 23545                | 32616                |
| 79658                | 22628                | 15940                |
| 276682               | 69303                | 44904                |
| 342                  | 1528                 | 1919                 |
| 288                  | 3009                 | 2553                 |
| 9753                 | 2708                 | 1965                 |
| 29                   | 502                  | 572                  |
| 2210                 | 10774                | 10429                |
| 28047                | 9476                 | 4453                 |
| 124145               | 37862                | 26310                |
| 88423                | 24231                | 17232                |
| 6340                 | 13670                | 15608                |
| 1497                 | 7176                 | 6976                 |
| 4744                 | 2588                 | 2018                 |
| 39411                | 12048                | 3936                 |
| 1004                 | 391                  | 162                  |
| 1521                 | 3375                 | 9236                 |
| 1160                 | 3598                 | 4314                 |
| 116                  | 516                  | 909                  |
| 2615                 | 4930                 | 8166                 |
| 1619                 | 3811                 | 5234                 |
| 6304                 | 4174                 | 3099                 |
| 2596                 | 709                  | 845                  |
| 10868                | 4451                 | 3542                 |
| 7702                 | 2946                 | 2364                 |
| 2196                 | 6056                 | 6156                 |
| 7024                 | 15622                | 18023                |
| 11649                | 26525                | 31232                |
| 60130                | 21207                | 7947                 |
| 204792               | 63906                | 59539                |
| 11526                | 17803                | 25077                |
| 4389                 | 2133                 | 1425                 |
| 4788                 | 3258                 | 1118                 |
| 7969                 | 12270                | 15206                |
| 110                  | 641                  | 861                  |
| 3174                 | 1079                 | 549                  |
| 1208                 | 267                  | 117                  |
| 16604                | 10010                | 4896                 |

|        |        |       |
|--------|--------|-------|
| 307413 | 116905 | 73161 |
| 50123  | 20340  | 16138 |
| 671    | 1013   | 1782  |
| 376    | 1018   | 1394  |
| 266    | 883    | 1181  |
| 25     | 250    | 242   |
| 34587  | 14279  | 13427 |
| 2185   | 1221   | 567   |
| 7239   | 14772  | 16287 |
| 36865  | 17027  | 10974 |
| 1864   | 5092   | 4678  |
| 24178  | 26489  | 38082 |
| 1582   | 665    | 544   |
| 2402   | 6817   | 7183  |
| 1157   | 540    | 243   |
| 995    | 3626   | 2883  |
| 1767   | 7472   | 4761  |
| 4468   | 10048  | 12196 |
| 6838   | 14839  | 15732 |
| 4749   | 2138   | 1644  |
| 16786  | 10421  | 5295  |
| 735    | 217    | 100   |
| 171819 | 70789  | 46208 |
| 68     | 587    | 367   |
| 588    | 6      | 6     |
| 1540   | 1636   | 959   |
| 9884   | 23134  | 24860 |
| 1888   | 758    | 339   |
| 241    | 76     | 25    |
| 948    | 382    | 232   |
| 1935   | 61     | 30    |
| 700    | 402    | 300   |
| 40790  | 21160  | 13882 |
| 48375  | 24117  | 22776 |
| 1715   | 3559   | 4097  |
| 5221   | 3164   | 1810  |
| 251526 | 112884 | 90423 |
| 6131   | 3279   | 2633  |
| 440    | 1521   | 1088  |
| 723    | 1977   | 1962  |
| 1358   | 796    | 621   |
| 3893   | 2169   | 1308  |
| 1768   | 2617   | 1591  |
| 7658   | 7033   | 3511  |
| 5628   | 2673   | 1876  |
| 3950   | 1846   | 1415  |
| 175604 | 84193  | 55431 |
| 906    | 2221   | 3138  |
| 4828   | 4126   | 2174  |
| 2510   | 4998   | 5136  |
| 10323  | 23094  | 22687 |

|         |        |        |
|---------|--------|--------|
| 589     | 751    | 2445   |
| 3718    | 9748   | 9586   |
| 85399   | 5062   | 9359   |
| 7973    | 15531  | 15725  |
| 881     | 1381   | 3202   |
| 711     | 1583   | 1570   |
| 16131   | 31939  | 38936  |
| 699     | 2043   | 2322   |
| 28043   | 16743  | 14096  |
| 420     | 991    | 728    |
| 793     | 463    | 226    |
| 1259    | 2532   | 2816   |
| 337152  | 167469 | 104777 |
| 226     | 110    | 132    |
| 40642   | 30961  | 20040  |
| 4098    | 11104  | 10570  |
| 2800    | 2329   | 2749   |
| 4213    | 11706  | 13995  |
| 220614  | 95246  | 71578  |
| 1245    | 710    | 310    |
| 787     | 1566   | 1683   |
| 162329  | 75982  | 50037  |
| 1221888 | 532426 | 356418 |
| 3413    | 6707   | 6929   |
| 3802    | 2167   | 1998   |
| 20      | 1      | 2      |
| 122     | 92     | 150    |
| 2708    | 3589   | 5494   |
| 243     | 1010   | 716    |
| 4379    | 7055   | 9582   |
| 846488  | 442192 | 282138 |
| 29392   | 12961  | 11450  |
| 7259    | 5287   | 3706   |
| 25095   | 15722  | 10190  |
| 10606   | 5043   | 3540   |
| 37110   | 21442  | 11939  |
| 5255    | 1831   | 1808   |
| 2129    | 2882   | 3375   |
| 35189   | 38251  | 57053  |
| 12822   | 20913  | 20590  |
| 3261    | 7316   | 7689   |
| 16723   | 28944  | 30578  |
| 10823   | 15553  | 17540  |
| 2371    | 4780   | 4568   |
| 948     | 2205   | 2404   |
| 5899    | 15807  | 11266  |
| 5032    | 6526   | 7554   |
| 2134    | 5044   | 5006   |
| 566     | 251    | 119    |
| 3492    | 5068   | 4523   |
| 13849   | 8513   | 6951   |

|         |        |        |
|---------|--------|--------|
| 3037    | 258    | 290    |
| 2258    | 5268   | 4822   |
| 1922    | 608    | 472    |
| 5505    | 4048   | 1952   |
| 261     | 4      | 5      |
| 933     | 66     | 106    |
| 2097    | 1926   | 1066   |
| 280     | 276    | 129    |
| 3516    | 2320   | 2343   |
| 0       | 185    | 192    |
| 16785   | 3236   | 3164   |
| 4143    | 4568   | 4221   |
| 2520    | 3973   | 3945   |
| 49018   | 25284  | 19667  |
| 7599    | 5174   | 3561   |
| 4141    | 3081   | 2253   |
| 856     | 360    | 348    |
| 1021    | 728    | 685    |
| 1299    | 629    | 516    |
| 1661    | 3419   | 4143   |
| 821     | 1393   | 1543   |
| 30526   | 14328  | 20739  |
| 2581    | 1874   | 1539   |
| 698     | 255    | 172    |
| 1218    | 2136   | 1787   |
| 118605  | 66130  | 46545  |
| 419     | 1238   | 1315   |
| 5566    | 3710   | 3647   |
| 2253    | 1623   | 1257   |
| 9937    | 14683  | 11430  |
| 13494   | 9091   | 6242   |
| 705     | 1345   | 1485   |
| 20693   | 3010   | 3257   |
| 3071    | 5656   | 6161   |
| 1502151 | 773747 | 526842 |
| 16707   | 9240   | 10835  |
| 4611    | 2841   | 2155   |
| 6531    | 12477  | 12048  |
| 2468    | 3796   | 4297   |
| 3446    | 5226   | 5158   |
| 14861   | 10768  | 8177   |
| 3269    | 2786   | 1979   |
| 1635    | 1410   | 1189   |
| 18121   | 10829  | 7387   |
| 6980    | 4740   | 4577   |
| 1110876 | 612013 | 425190 |
| 2398    | 5081   | 4749   |
| 587     | 339    | 317    |
| 6235    | 4711   | 3018   |
| 62205   | 55170  | 48198  |
| 2720    | 2157   | 1936   |

|        |        |        |
|--------|--------|--------|
| 8404   | 16428  | 16308  |
| 432940 | 223130 | 158775 |
| 87     | 356    | 441    |
| 6594   | 5217   | 4847   |
| 1157   | 795    | 642    |
| 4101   | 3407   | 2684   |
| 4249   | 6296   | 6703   |
| 838    | 435    | 233    |
| 6159   | 3932   | 4520   |
| 2575   | 1473   | 1234   |
| 919    | 397    | 513    |
| 0      | 144    | 146    |
| 17904  | 21102  | 12991  |
| 3593   | 2137   | 1352   |
| 199    | 550    | 511    |
| 2984   | 2280   | 1980   |
| 7006   | 4623   | 3981   |
| 1347   | 2347   | 2852   |
| 763    | 130    | 92     |
| 5536   | 9666   | 10328  |
| 1342   | 1143   | 719    |
| 11122  | 19404  | 24624  |
| 16597  | 17407  | 11755  |
| 2498   | 1602   | 942    |
| 3251   | 2632   | 2013   |
| 21537  | 12720  | 7669   |
| 292    | 84     | 41     |
| 3810   | 3526   | 3115   |
| 132622 | 89217  | 57253  |
| 2492   | 4349   | 4803   |
| 3114   | 2450   | 1507   |
| 10763  | 18745  | 23920  |
| 42419  | 88037  | 90133  |
| 1733   | 1927   | 1263   |
| 18937  | 28124  | 23451  |
| 3480   | 2483   | 2194   |
| 4474   | 3989   | 3424   |
| 12603  | 9525   | 8010   |
| 637    | 1894   | 1467   |
| 21487  | 49754  | 47804  |
| 1923   | 1131   | 923    |
| 4608   | 2600   | 1680   |
| 37482  | 83157  | 75790  |
| 1888   | 1479   | 1276   |
| 9572   | 18289  | 16729  |
| 13698  | 12054  | 9087   |
| 5439   | 4807   | 2432   |
| 1231   | 642    | 454    |
| 130    | 356    | 378    |
| 7415   | 3459   | 3302   |
| 19628  | 13023  | 10687  |

|        |        |        |
|--------|--------|--------|
| 67157  | 53327  | 68007  |
| 1745   | 1373   | 1235   |
| 552    | 969    | 1423   |
| 4678   | 1846   | 1865   |
| 476143 | 341853 | 279504 |
| 1695   | 1228   | 895    |
| 37398  | 32350  | 19126  |
| 3709   | 2066   | 2038   |
| 38089  | 26430  | 23008  |
| 43689  | 36820  | 20243  |
| 3088   | 3801   | 3816   |
| 729    | 1963   | 1902   |
| 2356   | 3598   | 4106   |
| 46     | 39     | 34     |
| 44512  | 62108  | 67551  |
| 5722   | 10687  | 9510   |
| 3623   | 4973   | 5381   |
| 600    | 640    | 404    |
| 2953   | 1876   | 1762   |
| 15493  | 23440  | 27385  |
| 2296   | 3678   | 5167   |
| 66     | 229    | 319    |
| 1313   | 3437   | 2860   |
| 7210   | 4498   | 2742   |
| 3918   | 3100   | 2348   |
| 9320   | 8346   | 6020   |
| 10758  | 17114  | 13593  |
| 2166   | 1708   | 725    |
| 1566   | 1280   | 1101   |
| 249    | 73     | 775    |
| 10740  | 7184   | 4427   |
| 55260  | 35784  | 27667  |
| 1307   | 961    | 864    |
| 1235   | 947    | 821    |
| 12426  | 6440   | 6834   |
| 21010  | 34918  | 37894  |
| 1591   | 1127   | 842    |
| 5891   | 9714   | 10077  |
| 27245  | 19352  | 10719  |
| 24155  | 27547  | 32682  |
| 39534  | 56904  | 58585  |
| 1708   | 1482   | 764    |
| 15242  | 21802  | 12595  |
| 519    | 1572   | 1674   |
| 1560   | 1258   | 1095   |
| 2835   | 5268   | 5325   |
| 1944   | 1296   | 498    |
| 1945   | 1506   | 1119   |
| 1579   | 1295   | 1140   |
| 63     | 319    | 235    |
| 1192   | 771    | 653    |

|        |        |        |
|--------|--------|--------|
| 53000  | 56975  | 28113  |
| 761    | 3883   | 2595   |
| 3196   | 3572   | 3752   |
| 5      | 0      | 0      |
| 1173   | 703    | 540    |
| 448    | 841    | 696    |
| 34071  | 54503  | 48575  |
| 789    | 1445   | 1502   |
| 2680   | 1701   | 1468   |
| 2603   | 2327   | 1832   |
| 4417   | 3062   | 3468   |
| 2181   | 1963   | 1084   |
| 9282   | 15957  | 13799  |
| 108383 | 84825  | 68421  |
| 157    | 594    | 473    |
| 899    | 1597   | 1583   |
| 214    | 457    | 551    |
| 4370   | 4188   | 3096   |
| 1886   | 3088   | 4017   |
| 4617   | 6178   | 6572   |
| 1262   | 2160   | 2009   |
| 3452   | 4534   | 4293   |
| 2646   | 6276   | 6098   |
| 8752   | 17981  | 14150  |
| 312    | 165    | 91     |
| 1043   | 2392   | 2305   |
| 1894   | 4043   | 3234   |
| 5439   | 8251   | 7821   |
| 1093   | 155    | 318    |
| 5333   | 8197   | 7718   |
| 10289  | 8105   | 6003   |
| 1783   | 3044   | 2402   |
| 11698  | 19336  | 19481  |
| 4475   | 7339   | 7286   |
| 17504  | 26907  | 27380  |
| 2811   | 936    | 1035   |
| 8704   | 5916   | 5202   |
| 14385  | 20820  | 19232  |
| 1024   | 1298   | 750    |
| 2022   | 2743   | 2667   |
| 3337   | 1637   | 1418   |
| 2124   | 3288   | 3403   |
| 205273 | 186050 | 169145 |
| 857    | 2271   | 1639   |
| 1182   | 2248   | 2246   |
| 19476  | 32814  | 32855  |
| 262    | 325    | 411    |
| 16749  | 7616   | 8458   |
| 2013   | 1539   | 900    |
| 113    | 326    | 254    |
| 1337   | 939    | 718    |

|       |       |       |
|-------|-------|-------|
| 97075 | 77954 | 62588 |
| 1984  | 78    | 158   |
| 4647  | 3471  | 2454  |
| 4499  | 1079  | 1058  |
| 21119 | 44005 | 36194 |
| 1190  | 1011  | 752   |
| 8226  | 5396  | 5545  |
| 2559  | 2968  | 2229  |
| 7560  | 14824 | 10994 |
| 4293  | 3360  | 2396  |
| 3587  | 5145  | 5287  |
| 589   | 480   | 482   |
| 15354 | 28756 | 28317 |
| 3788  | 2065  | 1741  |
| 3016  | 3590  | 2313  |
| 3311  | 5407  | 4561  |
| 7079  | 11043 | 9579  |
| 55607 | 93908 | 99066 |
| 2916  | 3907  | 4698  |
| 52722 | 45210 | 58767 |
| 762   | 1645  | 1455  |
| 6947  | 6674  | 4352  |
| 3127  | 3401  | 2563  |
| 16876 | 8839  | 8194  |
| 11865 | 8813  | 6167  |
| 8122  | 13113 | 13209 |
| 14947 | 14595 | 12231 |
| 14818 | 25412 | 23918 |
| 740   | 611   | 616   |
| 11157 | 10230 | 8581  |
| 4717  | 8195  | 7004  |
| 14094 | 11615 | 9207  |
| 5361  | 4015  | 3299  |
| 2516  | 1759  | 1356  |
| 1736  | 1763  | 1375  |
| 8375  | 6228  | 5238  |
| 3587  | 2857  | 2061  |
| 52052 | 25817 | 23285 |
| 1152  | 549   | 331   |
| 912   | 1204  | 1692  |
| 3020  | 4896  | 5432  |
| 8764  | 7808  | 4948  |
| 12984 | 16953 | 19850 |
| 26188 | 18106 | 15252 |
| 31787 | 52271 | 51496 |
| 3960  | 7393  | 8030  |
| 17003 | 44043 | 27466 |
| 4268  | 3218  | 2160  |
| 5275  | 9193  | 8649  |
| 7729  | 14242 | 12631 |
| 14589 | 13635 | 8355  |



|       |       |       |
|-------|-------|-------|
| 55123 | 48401 | 34651 |
| 12463 | 10402 | 8083  |
| 11429 | 7570  | 5793  |
| 15272 | 14567 | 10019 |
| 22296 | 17583 | 14944 |
| 660   | 1098  | 1185  |
| 1323  | 1049  | 818   |
| 164   | 263   | 208   |
| 2133  | 1205  | 991   |
| 8329  | 6458  | 4407  |
| 14787 | 24801 | 24453 |
| 3361  | 2242  | 1871  |
| 7565  | 7435  | 3737  |
| 4181  | 3481  | 2813  |
| 1720  | 1738  | 1246  |
| 1252  | 2154  | 1449  |
| 53195 | 46611 | 32378 |
| 725   | 351   | 257   |
| 1432  | 2091  | 2188  |
| 17906 | 23426 | 23228 |
| 576   | 356   | 312   |
| 3123  | 2123  | 1463  |
| 6761  | 6826  | 6838  |
| 5194  | 5559  | 3343  |
| 865   | 1293  | 1279  |
| 1223  | 1888  | 1904  |
| 8248  | 8716  | 5701  |
| 6664  | 5275  | 4760  |
| 5677  | 5398  | 2932  |
| 623   | 398   | 234   |
| 2112  | 1084  | 1125  |
| 3924  | 4634  | 4418  |
| 402   | 900   | 1006  |
| 225   | 701   | 656   |
| 532   | 397   | 187   |
| 1524  | 2742  | 2517  |
| 2854  | 4732  | 4618  |
| 471   | 478   | 204   |
| 3629  | 4793  | 4602  |
| 11573 | 19325 | 17847 |
| 1057  | 1116  | 526   |
| 1073  | 2169  | 2240  |
| 2386  | 4195  | 3868  |
| 1888  | 4482  | 3629  |
| 1098  | 494   | 369   |
| 14985 | 24906 | 26277 |
| 371   | 66    | 74    |
| 461   | 526   | 715   |
| 580   | 416   | 338   |
| 3677  | 2438  | 1888  |
| 63676 | 53369 | 42485 |

|       |        |        |
|-------|--------|--------|
| 7017  | 7053   | 4517   |
| 999   | 546    | 854    |
| 1692  | 3523   | 3228   |
| 5315  | 13195  | 11415  |
| 51795 | 31926  | 26219  |
| 2590  | 5385   | 4692   |
| 244   | 650    | 696    |
| 13353 | 13731  | 8133   |
| 175   | 120    | 58     |
| 3959  | 3585   | 2144   |
| 62526 | 108319 | 109729 |
| 5005  | 11012  | 7717   |
| 92456 | 73813  | 56006  |
| 1162  | 932    | 929    |
| 887   | 463    | 371    |
| 6097  | 10685  | 9117   |
| 3200  | 4279   | 4760   |
| 5696  | 7702   | 4167   |
| 3996  | 6139   | 5523   |
| 184   | 98     | 53     |
| 4045  | 6050   | 5086   |
| 496   | 152    | 188    |
| 3848  | 7016   | 7035   |
| 2224  | 1882   | 1749   |
| 6216  | 4360   | 2751   |
| 151   | 32     | 26     |
| 1079  | 1409   | 1394   |
| 4180  | 3687   | 2636   |
| 138   | 95     | 72     |
| 1488  | 2290   | 2080   |
| 3568  | 2564   | 1762   |
| 58904 | 46501  | 31568  |
| 3881  | 5070   | 4706   |
| 4737  | 3646   | 2328   |
| 665   | 385    | 263    |
| 45843 | 73390  | 61722  |
| 3617  | 3461   | 2399   |
| 2235  | 3496   | 3279   |
| 2424  | 1887   | 1767   |
| 6355  | 8629   | 8690   |
| 17478 | 29393  | 29130  |
| 1241  | 2111   | 1986   |
| 319   | 407    | 392    |
| 2911  | 5329   | 5227   |
| 46505 | 29951  | 21978  |
| 4583  | 7678   | 7638   |
| 1555  | 2926   | 2595   |
| 107   | 552    | 508    |
| 2812  | 3619   | 3552   |
| 853   | 1619   | 1607   |
| 11742 | 15336  | 15112  |

|        |        |        |
|--------|--------|--------|
| 1927   | 3536   | 3516   |
| 3379   | 2354   | 1830   |
| 784    | 1185   | 1294   |
| 31     | 82     | 115    |
| 4700   | 6649   | 4755   |
| 1052   | 487    | 1708   |
| 7115   | 5017   | 3565   |
| 2969   | 5562   | 5658   |
| 13022  | 11325  | 5960   |
| 41     | 195    | 135    |
| 8871   | 7445   | 8627   |
| 7023   | 6471   | 4774   |
| 5566   | 7918   | 7635   |
| 393    | 394    | 139    |
| 1469   | 3486   | 2536   |
| 3092   | 2590   | 1870   |
| 9935   | 9074   | 7489   |
| 1156   | 573    | 557    |
| 1144   | 791    | 776    |
| 353    | 826    | 549    |
| 6552   | 11386  | 10258  |
| 1544   | 987    | 682    |
| 6474   | 5951   | 4911   |
| 21835  | 28505  | 28660  |
| 497    | 1377   | 1214   |
| 8684   | 8420   | 5222   |
| 1944   | 1764   | 999    |
| 4044   | 4425   | 2746   |
| 12361  | 9289   | 7339   |
| 1738   | 3552   | 3123   |
| 15963  | 29831  | 26906  |
| 486    | 446    | 300    |
| 1872   | 1338   | 980    |
| 15884  | 24846  | 21771  |
| 38551  | 28637  | 24342  |
| 17307  | 26704  | 23082  |
| 1512   | 2252   | 2014   |
| 12420  | 20274  | 17434  |
| 5586   | 7831   | 7936   |
| 9919   | 14002  | 12058  |
| 73141  | 75121  | 54377  |
| 2396   | 4491   | 3706   |
| 26743  | 24402  | 17695  |
| 119    | 34     | 30     |
| 2424   | 3440   | 2955   |
| 4548   | 4991   | 5021   |
| 9153   | 19129  | 17917  |
| 2636   | 2502   | 1930   |
| 14676  | 14005  | 17566  |
| 264    | 236    | 93     |
| 379139 | 320300 | 207212 |

|       |       |       |
|-------|-------|-------|
| 1463  | 2136  | 2519  |
| 2310  | 2676  | 1855  |
| 4703  | 8282  | 7358  |
| 62987 | 62609 | 37976 |
| 9598  | 11798 | 11689 |
| 3246  | 5719  | 5266  |
| 4449  | 6769  | 5824  |
| 10785 | 6479  | 5572  |
| 1985  | 3016  | 3298  |
| 34560 | 29012 | 18557 |
| 114   | 31    | 19    |
| 811   | 636   | 529   |
| 3148  | 4482  | 4266  |
| 523   | 561   | 415   |
| 78282 | 64383 | 56589 |
| 5854  | 3402  | 4101  |
| 2224  | 4697  | 3971  |
| 919   | 1497  | 1325  |
| 89    | 257   | 227   |
| 5890  | 4425  | 4131  |
| 1411  | 3120  | 2196  |
| 2383  | 3832  | 3434  |
| 148   | 33    | 25    |
| 3534  | 6594  | 6506  |
| 14038 | 9719  | 9314  |
| 2585  | 2119  | 1307  |
| 3699  | 6293  | 5520  |
| 5493  | 4049  | 3912  |
| 417   | 418   | 293   |
| 1804  | 2518  | 2454  |
| 9818  | 15026 | 13798 |
| 3070  | 4501  | 4178  |
| 6285  | 12993 | 11467 |
| 12613 | 16304 | 15197 |
| 3906  | 2977  | 1975  |
| 29184 | 55527 | 52478 |
| 3400  | 4151  | 3903  |
| 465   | 1208  | 774   |
| 1081  | 956   | 545   |
| 7551  | 2561  | 2224  |
| 14872 | 13213 | 9438  |
| 4329  | 7544  | 6531  |
| 11419 | 6744  | 6245  |
| 494   | 950   | 964   |
| 4134  | 1935  | 3272  |
| 4559  | 3053  | 2420  |
| 701   | 384   | 159   |
| 5173  | 6038  | 6067  |
| 1317  | 2655  | 2290  |
| 558   | 986   | 868   |
| 3875  | 5300  | 5592  |

|       |       |       |
|-------|-------|-------|
| 2875  | 3307  | 1857  |
| 4007  | 6252  | 5509  |
| 4784  | 3152  | 2767  |
| 30098 | 23055 | 16129 |
| 3386  | 4347  | 5682  |
| 4760  | 6069  | 4607  |
| 1395  | 2371  | 2282  |
| 2366  | 1400  | 1159  |
| 398   | 675   | 612   |
| 690   | 601   | 282   |
| 240   | 246   | 260   |
| 46    | 0     | 1     |
| 23818 | 23011 | 12787 |
| 1528  | 2581  | 2297  |
| 4041  | 5542  | 5834  |
| 4070  | 2992  | 2458  |
| 2328  | 2031  | 1586  |
| 13266 | 10145 | 8329  |
| 174   | 168   | 75    |
| 2115  | 1999  | 1299  |
| 5457  | 4681  | 3542  |
| 889   | 623   | 387   |
| 15215 | 13108 | 10776 |
| 14286 | 22178 | 24538 |
| 1343  | 2155  | 2456  |
| 1728  | 1339  | 760   |
| 6875  | 7335  | 4528  |
| 3160  | 3336  | 2070  |
| 1352  | 993   | 773   |
| 1423  | 1399  | 875   |
| 10041 | 8176  | 6120  |
| 21089 | 23165 | 14680 |
| 900   | 863   | 1014  |
| 1586  | 868   | 950   |
| 1663  | 2784  | 2685  |
| 3021  | 2582  | 1945  |
| 2459  | 2411  | 1377  |
| 10167 | 10002 | 6801  |
| 4061  | 2866  | 2001  |
| 1717  | 2598  | 2549  |
| 3577  | 3333  | 2555  |
| 507   | 719   | 750   |
| 1901  | 1793  | 1083  |
| 10977 | 8195  | 6668  |
| 236   | 250   | 257   |
| 1473  | 2757  | 2561  |
| 9847  | 15153 | 14389 |
| 11172 | 10670 | 7294  |
| 1228  | 1102  | 946   |
| 8568  | 12781 | 11714 |
| 4266  | 5933  | 5089  |

|       |       |       |
|-------|-------|-------|
| 4791  | 4322  | 2467  |
| 1847  | 2097  | 1659  |
| 4597  | 7203  | 6497  |
| 2402  | 4375  | 4416  |
| 3     | 41    | 56    |
| 7328  | 7095  | 4388  |
| 1068  | 657   | 400   |
| 5359  | 4782  | 2666  |
| 1530  | 2222  | 2291  |
| 2091  | 4144  | 3507  |
| 1753  | 2031  | 1315  |
| 4706  | 4470  | 3134  |
| 34804 | 58335 | 52702 |
| 4138  | 7365  | 7271  |
| 2505  | 3062  | 2817  |
| 1404  | 2280  | 2303  |
| 8656  | 7726  | 4919  |
| 439   | 1075  | 1046  |
| 851   | 3028  | 1835  |
| 4584  | 6791  | 6807  |
| 11793 | 15467 | 15559 |
| 4322  | 5558  | 5344  |
| 2640  | 4718  | 4550  |
| 15773 | 25396 | 14502 |
| 2657  | 583   | 638   |
| 6584  | 9184  | 8124  |
| 812   | 896   | 703   |
| 976   | 643   | 415   |
| 807   | 550   | 400   |
| 6961  | 9888  | 9406  |
| 3568  | 3315  | 2061  |
| 29498 | 61010 | 52628 |
| 5678  | 8742  | 7921  |
| 2461  | 4383  | 4144  |
| 76347 | 58104 | 41306 |
| 14525 | 19218 | 16607 |
| 8123  | 8764  | 4996  |
| 7987  | 11602 | 12806 |
| 7923  | 14145 | 14439 |
| 380   | 308   | 219   |
| 1524  | 2899  | 2854  |
| 4580  | 6077  | 6188  |
| 16429 | 13320 | 10358 |
| 11272 | 17174 | 13808 |
| 11250 | 15227 | 12499 |
| 1952  | 3232  | 2927  |
| 972   | 1346  | 1367  |
| 742   | 762   | 655   |
| 3140  | 2525  | 2259  |
| 2106  | 4634  | 3809  |
| 37384 | 54195 | 48958 |

|        |        |       |
|--------|--------|-------|
| 5582   | 8188   | 7295  |
| 1217   | 2014   | 1860  |
| 3416   | 4269   | 4313  |
| 2177   | 3242   | 3276  |
| 26818  | 35736  | 33066 |
| 1565   | 1177   | 962   |
| 1558   | 2839   | 2397  |
| 75     | 43     | 34    |
| 1725   | 2037   | 2013  |
| 8136   | 10203  | 10599 |
| 11509  | 9777   | 5282  |
| 1722   | 2618   | 1946  |
| 1466   | 1062   | 787   |
| 6651   | 5805   | 4866  |
| 7855   | 11821  | 10199 |
| 9735   | 7173   | 5200  |
| 4138   | 6849   | 6295  |
| 22602  | 30332  | 27945 |
| 2347   | 3202   | 2985  |
| 4643   | 4741   | 2949  |
| 2108   | 1771   | 1168  |
| 1408   | 1677   | 1851  |
| 14820  | 26378  | 22276 |
| 106    | 11     | 16    |
| 1703   | 2627   | 2507  |
| 2215   | 1256   | 1387  |
| 120    | 379    | 283   |
| 17886  | 13830  | 11353 |
| 4755   | 6141   | 5358  |
| 379    | 907    | 804   |
| 1207   | 886    | 604   |
| 2665   | 2686   | 1707  |
| 1500   | 1216   | 916   |
| 899    | 452    | 409   |
| 3866   | 3616   | 2818  |
| 5918   | 5265   | 3726  |
| 9836   | 7107   | 5618  |
| 5873   | 5513   | 3923  |
| 9516   | 7241   | 4602  |
| 117548 | 107790 | 72548 |
| 4019   | 7196   | 7309  |
| 7643   | 6619   | 5920  |
| 1756   | 2029   | 1903  |
| 1581   | 4345   | 3365  |
| 419    | 55     | 93    |
| 97     | 130    | 153   |
| 1105   | 517    | 463   |
| 2553   | 2080   | 1782  |
| 788    | 242    | 147   |
| 45884  | 62961  | 44574 |
| 16408  | 13931  | 11439 |

|        |        |        |
|--------|--------|--------|
| 3941   | 2967   | 1897   |
| 11599  | 18117  | 14012  |
| 669    | 635    | 453    |
| 140    | 76     | 43     |
| 757    | 1498   | 1345   |
| 1764   | 3281   | 2923   |
| 5120   | 4395   | 3258   |
| 3936   | 1294   | 2547   |
| 3562   | 5664   | 5313   |
| 3061   | 3329   | 2882   |
| 1352   | 1994   | 2045   |
| 3722   | 4359   | 3954   |
| 1431   | 2116   | 2168   |
| 3421   | 3022   | 2385   |
| 2786   | 2434   | 1810   |
| 2356   | 3645   | 3240   |
| 4734   | 4257   | 2998   |
| 15777  | 14086  | 8534   |
| 3114   | 3077   | 2244   |
| 3125   | 1957   | 1729   |
| 2145   | 2870   | 2814   |
| 2997   | 4662   | 4602   |
| 8029   | 10277  | 9527   |
| 3362   | 5796   | 5720   |
| 48376  | 35047  | 24422  |
| 6629   | 10865  | 9411   |
| 1406   | 1911   | 1953   |
| 4100   | 6299   | 5229   |
| 137742 | 127391 | 105771 |
| 412    | 221    | 162    |
| 3785   | 4924   | 4342   |
| 3      | 59     | 38     |
| 11861  | 20469  | 15237  |
| 2900   | 2260   | 2010   |
| 381    | 726    | 626    |
| 433    | 298    | 246    |
| 208    | 126    | 89     |
| 6105   | 5452   | 3063   |
| 1484   | 1756   | 1837   |
| 3490   | 3134   | 2261   |
| 1268   | 1293   | 858    |
| 7460   | 10539  | 9097   |
| 2220   | 1116   | 879    |
| 3413   | 5466   | 5413   |
| 11072  | 13982  | 7564   |
| 12456  | 18894  | 17167  |
| 6320   | 8515   | 7916   |
| 9429   | 8999   | 6444   |
| 1930   | 2907   | 2580   |
| 12986  | 19822  | 17622  |
| 12107  | 14903  | 14150  |



|       |       |       |
|-------|-------|-------|
| 415   | 695   | 669   |
| 25772 | 20898 | 14858 |
| 4158  | 4169  | 2261  |
| 13251 | 19415 | 17664 |
| 3059  | 4352  | 4871  |
| 380   | 809   | 514   |
| 2237  | 2250  | 1166  |
| 141   | 359   | 306   |
| 3115  | 4419  | 4017  |
| 4067  | 6069  | 5666  |
| 4441  | 7700  | 6889  |
| 18496 | 27220 | 25185 |
| 8598  | 9601  | 9365  |
| 8415  | 8209  | 5014  |
| 19158 | 16879 | 11637 |
| 466   | 355   | 254   |
| 22928 | 32598 | 32272 |
| 9574  | 11505 | 8432  |
| 2687  | 2743  | 2535  |
| 2863  | 4047  | 3609  |
| 5669  | 7606  | 7118  |
| 3424  | 3662  | 3538  |
| 310   | 487   | 609   |
| 1889  | 2176  | 1204  |
| 835   | 2104  | 1783  |
| 927   | 2236  | 1687  |
| 11121 | 14440 | 10594 |
| 3920  | 5161  | 4659  |
| 17889 | 27539 | 26615 |
| 76906 | 78446 | 58444 |
| 291   | 171   | 132   |
| 499   | 633   | 581   |
| 4531  | 1918  | 2132  |
| 52    | 411   | 239   |
| 3519  | 6322  | 5428  |
| 5352  | 5706  | 4494  |
| 3909  | 2720  | 2033  |
| 3573  | 3234  | 1950  |
| 2622  | 6620  | 4305  |
| 1439  | 2168  | 1661  |
| 10275 | 14645 | 13805 |
| 826   | 1446  | 1353  |
| 2986  | 3377  | 3233  |
| 310   | 131   | 117   |
| 1249  | 1684  | 1642  |
| 2914  | 4807  | 3369  |
| 7165  | 6463  | 5094  |
| 2815  | 2574  | 1621  |
| 11558 | 9513  | 7908  |
| 49032 | 57119 | 57058 |
| 6280  | 8550  | 8168  |

|        |        |        |
|--------|--------|--------|
| 8174   | 5549   | 4732   |
| 3726   | 4782   | 4611   |
| 10049  | 17166  | 15832  |
| 933    | 1548   | 1340   |
| 542    | 964    | 733    |
| 12646  | 15122  | 15879  |
| 134    | 619    | 450    |
| 411202 | 340371 | 225180 |
| 21722  | 23286  | 16314  |
| 54413  | 38797  | 26146  |
| 2461   | 2063   | 1372   |
| 10179  | 8818   | 7736   |
| 15882  | 13083  | 7813   |
| 17491  | 28321  | 24290  |
| 906    | 832    | 525    |
| 103369 | 135593 | 112013 |
| 15046  | 18789  | 18935  |
| 1412   | 1710   | 1982   |
| 5386   | 6605   | 6596   |
| 55     | 142    | 139    |
| 3529   | 2725   | 1876   |
| 2729   | 4540   | 4355   |
| 6285   | 8023   | 7130   |
| 1246   | 2572   | 2205   |
| 2982   | 2519   | 1610   |
| 9453   | 8799   | 5441   |
| 126    | 348    | 301    |
| 715    | 769    | 670    |
| 3475   | 3832   | 3534   |
| 1920   | 1322   | 966    |
| 41249  | 60799  | 68273  |
| 654    | 969    | 1021   |
| 84510  | 76220  | 49284  |
| 28842  | 23459  | 18521  |
| 3250   | 4027   | 3766   |
| 67688  | 105548 | 98799  |
| 206149 | 144170 | 101734 |
| 1731   | 2445   | 1131   |
| 23716  | 34423  | 35255  |
| 728    | 553    | 492    |
| 202726 | 202719 | 128540 |
| 4394   | 3798   | 2496   |
| 919    | 1585   | 1463   |
| 241    | 455    | 359    |
| 1393   | 1888   | 1781   |
| 3221   | 2294   | 1786   |
| 510    | 379    | 291    |
| 2829   | 2028   | 1748   |
| 604    | 108    | 162    |
| 2364   | 3709   | 3343   |
| 20989  | 12992  | 14621  |

|       |       |       |
|-------|-------|-------|
| 839   | 1485  | 1201  |
| 4810  | 4723  | 3927  |
| 871   | 1079  | 762   |
| 106   | 44    | 28    |
| 106   | 44    | 28    |
| 106   | 44    | 28    |
| 7280  | 11786 | 10305 |
| 781   | 2065  | 1789  |
| 19035 | 45291 | 35933 |
| 4189  | 6573  | 5414  |
| 3040  | 3184  | 3229  |
| 1943  | 3458  | 2782  |
| 1510  | 2305  | 2076  |
| 5694  | 5468  | 4110  |
| 881   | 1035  | 980   |
| 16335 | 30873 | 27180 |
| 1727  | 1545  | 1213  |
| 1104  | 2116  | 1852  |
| 16089 | 13429 | 6762  |
| 2466  | 3182  | 3148  |
| 88    | 243   | 232   |
| 1001  | 1754  | 1396  |
| 471   | 585   | 537   |
| 1267  | 2438  | 2134  |
| 24564 | 27298 | 17402 |
| 760   | 709   | 318   |
| 15    | 103   | 115   |
| 2997  | 2635  | 2114  |
| 7205  | 7266  | 4275  |
| 1117  | 2690  | 2266  |
| 387   | 240   | 153   |
| 659   | 1212  | 1262  |
| 3820  | 3225  | 1959  |
| 17375 | 14156 | 10062 |
| 8765  | 12947 | 11613 |
| 49    | 13    | 12    |
| 6691  | 8652  | 8314  |
| 4093  | 3969  | 3480  |
| 17252 | 15055 | 11714 |
| 5013  | 5210  | 3150  |
| 4708  | 4185  | 3632  |
| 883   | 1863  | 1409  |
| 820   | 1498  | 1466  |
| 5695  | 6295  | 4163  |
| 1897  | 1798  | 1372  |
| 6253  | 2625  | 2305  |
| 4618  | 4956  | 4102  |
| 1609  | 3759  | 3978  |
| 5691  | 11855 | 8867  |
| 2206  | 2136  | 1539  |
| 7731  | 10105 | 10073 |

|       |       |       |
|-------|-------|-------|
| 4932  | 3403  | 2977  |
| 3719  | 6416  | 5405  |
| 2273  | 1736  | 1478  |
| 2733  | 5770  | 3943  |
| 11753 | 9727  | 6239  |
| 900   | 905   | 604   |
| 290   | 144   | 72    |
| 14457 | 11969 | 8201  |
| 3869  | 4913  | 4428  |
| 323   | 185   | 95    |
| 30409 | 26488 | 20373 |
| 6395  | 8816  | 7876  |
| 9808  | 14272 | 12511 |
| 3098  | 4472  | 4668  |
| 4968  | 6374  | 5454  |
| 2668  | 3368  | 3212  |
| 455   | 945   | 982   |
| 1450  | 1621  | 1863  |
| 6718  | 9324  | 8189  |
| 3418  | 2359  | 1660  |
| 5353  | 5117  | 3152  |
| 1530  | 1293  | 1015  |
| 18    | 57    | 72    |
| 1074  | 1222  | 1370  |
| 4571  | 4659  | 2934  |
| 10801 | 15246 | 14006 |
| 4565  | 4217  | 3757  |
| 17719 | 13275 | 10676 |
| 2375  | 2254  | 1353  |
| 10058 | 16868 | 14670 |
| 16470 | 14947 | 7720  |
| 2257  | 1789  | 1525  |
| 5904  | 4650  | 4098  |
| 997   | 2301  | 1429  |
| 9670  | 9862  | 5382  |
| 4073  | 3898  | 2875  |
| 7164  | 7520  | 4803  |
| 197   | 43    | 54    |
| 14334 | 18212 | 17712 |
| 7561  | 5311  | 4555  |
| 1408  | 979   | 641   |
| 3278  | 4505  | 4046  |
| 5782  | 8315  | 6779  |
| 803   | 464   | 422   |
| 5221  | 9053  | 8381  |
| 604   | 1106  | 864   |
| 18069 | 20041 | 18408 |
| 123   | 334   | 244   |
| 1349  | 1383  | 838   |
| 5883  | 5299  | 3827  |
| 435   | 1025  | 1018  |

|       |       |       |
|-------|-------|-------|
| 11122 | 10146 | 6320  |
| 5267  | 4856  | 2489  |
| 142   | 144   | 88    |
| 27689 | 63155 | 46538 |
| 5924  | 4984  | 2866  |
| 1397  | 1680  | 1331  |
| 13832 | 20268 | 16144 |
| 36824 | 28895 | 22742 |
| 1551  | 2897  | 2404  |
| 9290  | 12673 | 11782 |
| 441   | 850   | 868   |
| 8510  | 4471  | 3916  |
| 25656 | 18970 | 17679 |
| 202   | 567   | 503   |
| 4550  | 5518  | 5048  |
| 7145  | 9328  | 8782  |
| 1659  | 2764  | 2528  |
| 8405  | 7676  | 5379  |
| 1409  | 2484  | 2254  |
| 872   | 791   | 541   |
| 4091  | 5625  | 5474  |
| 4559  | 4662  | 2737  |
| 1838  | 1931  | 1728  |
| 3976  | 3792  | 2705  |
| 1973  | 1543  | 982   |
| 1628  | 2110  | 2152  |
| 686   | 1210  | 1034  |
| 1642  | 2058  | 2123  |
| 2076  | 2911  | 2749  |
| 3955  | 4839  | 4804  |
| 37175 | 47996 | 35150 |
| 6923  | 6014  | 5165  |
| 5789  | 5059  | 3803  |
| 878   | 856   | 641   |
| 33036 | 50180 | 46616 |
| 1316  | 1866  | 1705  |
| 30    | 44    | 131   |
| 30076 | 36592 | 35525 |
| 22549 | 39286 | 30739 |
| 395   | 656   | 658   |
| 294   | 153   | 94    |
| 4488  | 5300  | 5061  |
| 2100  | 3683  | 3464  |
| 25874 | 36239 | 34458 |
| 32239 | 26431 | 18545 |
| 2429  | 2700  | 1575  |
| 4460  | 3794  | 3213  |
| 537   | 332   | 324   |
| 1667  | 1460  | 1092  |
| 46450 | 75054 | 57238 |
| 1173  | 197   | 157   |

|        |       |       |
|--------|-------|-------|
| 321    | 652   | 620   |
| 176580 | 46566 | 33773 |
| 1530   | 5876  | 4090  |
| 3132   | 2268  | 1871  |
| 1820   | 1243  | 915   |
| 4657   | 4563  | 3584  |
| 2201   | 2699  | 2414  |
| 1587   | 1443  | 1113  |
| 11084  | 16210 | 14167 |
| 372    | 393   | 386   |
| 23287  | 31375 | 29387 |
| 996    | 924   | 540   |
| 1643   | 2659  | 2471  |
| 5965   | 9730  | 7042  |
| 2104   | 1674  | 1056  |
| 622    | 172   | 134   |
| 166    | 38    | 55    |
| 1310   | 2265  | 1966  |
| 6873   | 5073  | 4418  |
| 435    | 669   | 685   |
| 22047  | 28568 | 28476 |
| 1288   | 1239  | 910   |
| 19158  | 32507 | 29150 |
| 67     | 306   | 288   |
| 1567   | 2373  | 2243  |
| 654    | 588   | 357   |
| 12967  | 12264 | 7760  |
| 8      | 3     | 1     |
| 9      | 36    | 26    |
| 144802 | 39148 | 28708 |
| 3870   | 3193  | 2687  |
| 2593   | 4028  | 3519  |
| 20665  | 18319 | 11066 |
| 5596   | 6319  | 4416  |
| 646    | 1186  | 937   |
| 2673   | 4541  | 3844  |
| 1738   | 2300  | 1283  |
| 5716   | 7471  | 7117  |
| 332    | 873   | 818   |
| 2712   | 2689  | 1667  |
| 2106   | 1559  | 1394  |
| 421    | 298   | 207   |
| 764    | 1245  | 1209  |
| 2578   | 3472  | 3279  |
| 10520  | 9411  | 7157  |
| 3622   | 5409  | 5156  |
| 4346   | 4650  | 3011  |
| 10334  | 15624 | 14064 |
| 5683   | 7591  | 7076  |
| 1432   | 958   | 794   |
| 2930   | 2749  | 1841  |

|       |       |       |
|-------|-------|-------|
| 484   | 427   | 312   |
| 1815  | 2697  | 2662  |
| 8192  | 11747 | 11010 |
| 2637  | 2144  | 1363  |
| 2191  | 3604  | 3028  |
| 21    | 17    | 8     |
| 3232  | 2415  | 1912  |
| 2138  | 3931  | 3572  |
| 1730  | 1320  | 856   |
| 811   | 752   | 372   |
| 696   | 542   | 493   |
| 3248  | 1386  | 1247  |
| 4879  | 8255  | 6952  |
| 1519  | 1326  | 923   |
| 5276  | 5362  | 3532  |
| 457   | 423   | 292   |
| 624   | 1846  | 1745  |
| 40    | 19    | 10    |
| 6645  | 9196  | 8320  |
| 273   | 411   | 413   |
| 2186  | 3591  | 3399  |
| 13079 | 16925 | 17295 |
| 1999  | 1320  | 985   |
| 61779 | 64710 | 40548 |
| 2149  | 1347  | 1106  |

| VD-3 in experiment 1 | VD-4 in experiment 1 | VD-5 in experiment 1 |
|----------------------|----------------------|----------------------|
| 13018                | 22488                | 694                  |
| 2151                 | 8084                 | 10321                |
| 4656                 | 6920                 | 127                  |
| 6108                 | 9387                 | 318                  |
| 1167                 | 1578                 | 34                   |
| 15900                | 27606                | 1939                 |
| 3757                 | 4262                 | 912                  |
| 6720                 | 9648                 | 11236                |
| 7686                 | 12366                | 18420                |
| 5951                 | 9100                 | 782                  |
| 4397                 | 6211                 | 559                  |
| 48658                | 60790                | 19685                |
| 35523                | 55578                | 4954                 |
| 14260                | 22482                | 8731                 |
| 46685                | 61758                | 21273                |
| 2057                 | 3527                 | 212                  |
| 1795                 | 2908                 | 181                  |
| 1554                 | 2922                 | 1208                 |
| 584                  | 699                  | 21                   |
| 9639                 | 14742                | 1252                 |
| 3270                 | 4355                 | 8898                 |
| 24029                | 37452                | 15089                |
| 17607                | 26452                | 7822                 |
| 20028                | 33839                | 2743                 |
| 6486                 | 10087                | 975                  |
| 1470                 | 1785                 | 1256                 |
| 3169                 | 3006                 | 16105                |
| 168                  | 172                  | 153                  |
| 4619                 | 8489                 | 794                  |
| 4612                 | 7771                 | 509                  |
| 792                  | 1224                 | 57                   |
| 8376                 | 13794                | 1296                 |
| 5186                 | 8271                 | 598                  |
| 2034                 | 3241                 | 3236                 |
| 641                  | 694                  | 320                  |
| 2610                 | 4980                 | 1673                 |
| 1948                 | 2919                 | 1138                 |
| 6264                 | 10534                | 1242                 |
| 17180                | 28403                | 4199                 |
| 28006                | 45950                | 6162                 |
| 6468                 | 7347                 | 28085                |
| 51724                | 70950                | 129534               |
| 22662                | 37043                | 3732                 |
| 1192                 | 2077                 | 1794                 |
| 717                  | 890                  | 2327                 |
| 15212                | 23803                | 3569                 |
| 856                  | 1046                 | 92                   |
| 390                  | 519                  | 2213                 |
| 81                   | 68                   | 404                  |
| 3566                 | 4738                 | 5835                 |



|       |        |        |
|-------|--------|--------|
| 67991 | 99772  | 26701  |
| 13994 | 22020  | 11416  |
| 1691  | 2857   | 212    |
| 1529  | 2318   | 268    |
| 1320  | 1962   | 190    |
| 157   | 335    | 13     |
| 13379 | 18593  | 37692  |
| 410   | 483    | 924    |
| 15624 | 27872  | 3768   |
| 11430 | 15513  | 2634   |
| 5724  | 8285   | 1091   |
| 32402 | 56569  | 7918   |
| 452   | 748    | 275    |
| 6166  | 10014  | 1520   |
| 332   | 313    | 124    |
| 2200  | 3323   | 1091   |
| 4331  | 4462   | 2013   |
| 10018 | 14849  | 1985   |
| 15420 | 23567  | 4760   |
| 1752  | 2752   | 561    |
| 3423  | 5166   | 9417   |
| 47    | 61     | 343    |
| 49521 | 73791  | 16399  |
| 349   | 860    | 47     |
| 7     | 1      | 58     |
| 678   | 1188   | 539    |
| 24349 | 43316  | 6582   |
| 196   | 301    | 739    |
| 16    | 12     | 120    |
| 291   | 429    | 51     |
| 217   | 286    | 30     |
| 192   | 249    | 153    |
| 14078 | 21798  | 4398   |
| 21745 | 30162  | 49352  |
| 3399  | 5714   | 1169   |
| 987   | 1475   | 1954   |
| 61245 | 72224  | 106513 |
| 2224  | 4032   | 1604   |
| 1082  | 2193   | 333    |
| 1902  | 3057   | 864    |
| 627   | 939    | 477    |
| 1535  | 1557   | 1609   |
| 1305  | 2870   | 622    |
| 2547  | 3059   | 3275   |
| 1876  | 3355   | 892    |
| 1333  | 2451   | 495    |
| 62698 | 101195 | 22858  |
| 2563  | 4380   | 399    |
| 1352  | 1738   | 1900   |
| 5416  | 8831   | 702    |
| 20308 | 31509  | 8979   |

|        |        |        |
|--------|--------|--------|
| 1288   | 1930   | 217    |
| 9264   | 14664  | 2872   |
| 13777  | 23963  | 6553   |
| 18045  | 27685  | 4057   |
| 1883   | 2971   | 413    |
| 1679   | 2605   | 486    |
| 40396  | 54194  | 10174  |
| 1850   | 3405   | 627    |
| 11126  | 15921  | 12492  |
| 1559   | 1725   | 91     |
| 243    | 336    | 146    |
| 2850   | 4345   | 452    |
| 120536 | 175273 | 39272  |
| 91     | 111    | 28     |
| 11494  | 17903  | 9978   |
| 8548   | 13594  | 3034   |
| 2840   | 6123   | 1009   |
| 6819   | 8003   | 3040   |
| 52369  | 71087  | 101830 |
| 211    | 206    | 430    |
| 1604   | 3200   | 906    |
| 58001  | 75466  | 15565  |
| 390372 | 613401 | 158358 |
| 6621   | 10888  | 1724   |
| 1309   | 1926   | 1330   |
| 0      | 7      | 0      |
| 71     | 77     | 14     |
| 3739   | 6074   | 1709   |
| 614    | 762    | 172    |
| 6823   | 10848  | 2905   |
| 308279 | 479777 | 104682 |
| 8995   | 16605  | 4499   |
| 3005   | 4484   | 2789   |
| 6083   | 8836   | 10195  |
| 3966   | 5268   | 1197   |
| 8318   | 14758  | 12029  |
| 1350   | 2412   | 1423   |
| 2823   | 5001   | 1196   |
| 46574  | 79950  | 14613  |
| 22556  | 38127  | 9444   |
| 6435   | 10340  | 1583   |
| 30042  | 49239  | 7576   |
| 16677  | 25733  | 7646   |
| 4479   | 7111   | 1455   |
| 2135   | 3388   | 577    |
| 15641  | 23229  | 3602   |
| 5815   | 12172  | 1154   |
| 3994   | 5896   | 1288   |
| 86     | 145    | 149    |
| 4964   | 8512   | 3389   |
| 5481   | 8430   | 7687   |

|        |        |        |
|--------|--------|--------|
| 376    | 446    | 557    |
| 3764   | 6184   | 1899   |
| 427    | 886    | 321    |
| 1509   | 1802   | 3335   |
| 2      | 1      | 15     |
| 70     | 97     | 56     |
| 721    | 942    | 1065   |
| 142    | 224    | 48     |
| 2245   | 3575   | 1421   |
| 271    | 480    | 2      |
| 2759   | 5054   | 2690   |
| 5670   | 8412   | 2602   |
| 4012   | 6287   | 1730   |
| 13684  | 26910  | 6381   |
| 2730   | 4468   | 3186   |
| 1482   | 3003   | 802    |
| 285    | 483    | 338    |
| 726    | 1197   | 432    |
| 428    | 539    | 357    |
| 3590   | 5457   | 1044   |
| 1758   | 2757   | 424    |
| 14073  | 23743  | 16542  |
| 1177   | 2181   | 1109   |
| 181    | 202    | 232    |
| 1221   | 2939   | 2443   |
| 36965  | 59774  | 48105  |
| 1298   | 1854   | 805    |
| 2785   | 4258   | 2136   |
| 1010   | 1888   | 668    |
| 8822   | 21852  | 27185  |
| 6341   | 10264  | 2322   |
| 1164   | 2118   | 378    |
| 4461   | 7081   | 3782   |
| 5842   | 9533   | 979    |
| 567639 | 906228 | 196423 |
| 6005   | 9427   | 8532   |
| 1360   | 2192   | 2051   |
| 11074  | 17112  | 3871   |
| 3547   | 5982   | 1945   |
| 4763   | 8459   | 1929   |
| 6420   | 10059  | 6678   |
| 1539   | 2517   | 999    |
| 859    | 1341   | 821    |
| 7211   | 7688   | 8388   |
| 3523   | 5361   | 2687   |
| 436494 | 717529 | 151597 |
| 3816   | 5922   | 1010   |
| 273    | 384    | 1059   |
| 2077   | 3600   | 6805   |
| 35876  | 56518  | 28124  |
| 1540   | 2578   | 1556   |

|        |        |       |
|--------|--------|-------|
| 13428  | 21423  | 5492  |
| 175144 | 277646 | 64011 |
| 259    | 369    | 82    |
| 3609   | 5723   | 3070  |
| 537    | 985    | 381   |
| 2132   | 2913   | 2167  |
| 6567   | 12177  | 1957  |
| 184    | 435    | 96    |
| 3174   | 6368   | 3522  |
| 1035   | 1528   | 511   |
| 243    | 447    | 358   |
| 133    | 130    | 67    |
| 9626   | 13561  | 9087  |
| 1402   | 1916   | 1149  |
| 407    | 764    | 98    |
| 1447   | 2306   | 1591  |
| 2954   | 5228   | 1552  |
| 2217   | 3769   | 807   |
| 129    | 147    | 212   |
| 8719   | 15273  | 2632  |
| 409    | 674    | 657   |
| 17581  | 29283  | 5389  |
| 8130   | 11059  | 5951  |
| 728    | 1375   | 932   |
| 1607   | 2109   | 1108  |
| 10181  | 13549  | 6759  |
| 35     | 69     | 41    |
| 1966   | 3111   | 1568  |
| 55417  | 80560  | 19239 |
| 2989   | 4832   | 1380  |
| 1436   | 1629   | 1035  |
| 16984  | 28173  | 5256  |
| 80652  | 134123 | 21588 |
| 1014   | 1663   | 731   |
| 23239  | 35047  | 17111 |
| 1934   | 3126   | 1340  |
| 2392   | 3059   | 975   |
| 5580   | 6480   | 4738  |
| 1030   | 1147   | 756   |
| 37850  | 55985  | 13856 |
| 927    | 1345   | 1151  |
| 1479   | 2069   | 2648  |
| 66174  | 97453  | 15145 |
| 999    | 1813   | 1127  |
| 13200  | 21961  | 5936  |
| 7012   | 12962  | 3518  |
| 1714   | 2449   | 3044  |
| 339    | 605    | 284   |
| 368    | 763    | 13    |
| 2150   | 4275   | 1480  |
| 7575   | 12589  | 2581  |

|        |        |       |
|--------|--------|-------|
| 61213  | 122391 | 18614 |
| 981    | 1747   | 1036  |
| 927    | 1607   | 281   |
| 1323   | 2562   | 1464  |
| 195252 | 335653 | 87259 |
| 828    | 1389   | 497   |
| 13888  | 18819  | 19163 |
| 1525   | 2460   | 840   |
| 18497  | 21343  | 15750 |
| 13466  | 21193  | 22758 |
| 4131   | 6770   | 1197  |
| 1575   | 2482   | 505   |
| 3252   | 4576   | 1358  |
| 20     | 50     | 101   |
| 72208  | 128870 | 18953 |
| 7796   | 12533  | 4715  |
| 4812   | 7622   | 1697  |
| 287    | 549    | 288   |
| 1278   | 2213   | 1035  |
| 28875  | 43176  | 8514  |
| 3353   | 5853   | 1081  |
| 207    | 386    | 89    |
| 2865   | 4042   | 750   |
| 2446   | 2827   | 1355  |
| 1747   | 2615   | 1624  |
| 5003   | 7718   | 3528  |
| 11219  | 17887  | 2802  |
| 683    | 1114   | 1649  |
| 895    | 1594   | 987   |
| 231    | 583    | 124   |
| 2907   | 4372   | 6138  |
| 24848  | 41605  | 19791 |
| 620    | 911    | 518   |
| 530    | 834    | 537   |
| 6100   | 8916   | 3540  |
| 34439  | 58414  | 10947 |
| 763    | 990    | 626   |
| 7305   | 10898  | 1887  |
| 9220   | 12468  | 13389 |
| 34311  | 52413  | 12063 |
| 54893  | 91553  | 15100 |
| 688    | 959    | 762   |
| 7315   | 11372  | 6523  |
| 1490   | 2198   | 365   |
| 881    | 1589   | 987   |
| 4942   | 8028   | 1357  |
| 247    | 568    | 787   |
| 987    | 1589   | 701   |
| 896    | 1634   | 1011  |
| 119    | 231    | 30    |
| 534    | 864    | 269   |

|       |        |       |
|-------|--------|-------|
| 22163 | 26761  | 29501 |
| 2063  | 2940   | 494   |
| 2965  | 5912   | 1163  |
| 0     | 7      | 0     |
| 360   | 609    | 351   |
| 974   | 1754   | 229   |
| 44862 | 80854  | 14266 |
| 1254  | 1909   | 675   |
| 1205  | 2053   | 912   |
| 1409  | 2323   | 1318  |
| 2304  | 3403   | 1220  |
| 847   | 1597   | 804   |
| 12519 | 19585  | 6089  |
| 48732 | 79310  | 35329 |
| 299   | 731    | 133   |
| 1632  | 2555   | 546   |
| 361   | 676    | 189   |
| 2316  | 4197   | 1623  |
| 3811  | 5145   | 1077  |
| 5277  | 9623   | 1694  |
| 1632  | 2918   | 960   |
| 3961  | 6537   | 2872  |
| 4351  | 7126   | 1414  |
| 10483 | 15943  | 3359  |
| 65    | 142    | 75    |
| 1870  | 2962   | 496   |
| 2501  | 4139   | 1949  |
| 7154  | 11491  | 1632  |
| 178   | 315    | 49    |
| 6766  | 11378  | 3517  |
| 4988  | 6511   | 3239  |
| 2972  | 4997   | 590   |
| 18793 | 31507  | 5973  |
| 6618  | 11184  | 2649  |
| 27274 | 45571  | 10399 |
| 830   | 1260   | 867   |
| 4027  | 7271   | 2030  |
| 18280 | 30101  | 6797  |
| 436   | 634    | 28    |
| 2532  | 3884   | 978   |
| 1314  | 1656   | 1441  |
| 3201  | 4922   | 1140  |
| 81071 | 158662 | 77500 |
| 1212  | 2094   | 504   |
| 2292  | 3481   | 610   |
| 29674 | 48676  | 9459  |
| 344   | 620    | 134   |
| 7083  | 11749  | 5732  |
| 749   | 1148   | 539   |
| 243   | 437    | 388   |
| 599   | 1045   | 300   |

|       |        |       |
|-------|--------|-------|
| 41129 | 60677  | 39454 |
| 213   | 114    | 1021  |
| 2077  | 3155   | 1685  |
| 880   | 1542   | 840   |
| 28168 | 36492  | 6826  |
| 719   | 1353   | 310   |
| 4174  | 7339   | 2490  |
| 1627  | 2347   | 2879  |
| 12416 | 19467  | 5291  |
| 1855  | 2891   | 1655  |
| 4589  | 7261   | 1723  |
| 418   | 590    | 296   |
| 25360 | 42554  | 8824  |
| 1311  | 1923   | 2596  |
| 1385  | 1605   | 1866  |
| 3387  | 5603   | 1899  |
| 10439 | 17497  | 3029  |
| 91070 | 152643 | 27241 |
| 4233  | 6683   | 1314  |
| 53447 | 99769  | 19726 |
| 1234  | 2147   | 495   |
| 3192  | 4714   | 2166  |
| 2005  | 3330   | 667   |
| 5854  | 11296  | 3482  |
| 5435  | 7802   | 3131  |
| 11776 | 18177  | 2518  |
| 7443  | 12005  | 5545  |
| 20472 | 36786  | 7172  |
| 358   | 674    | 418   |
| 6426  | 10622  | 4913  |
| 6317  | 10226  | 3150  |
| 7710  | 12147  | 5394  |
| 2068  | 3327   | 4853  |
| 882   | 1451   | 690   |
| 983   | 2056   | 431   |
| 3812  | 6787   | 1619  |
| 1314  | 2642   | 1191  |
| 19018 | 25704  | 13263 |
| 316   | 351    | 419   |
| 1247  | 1984   | 281   |
| 4101  | 6084   | 1254  |
| 4455  | 6582   | 3330  |
| 17077 | 23333  | 4682  |
| 11272 | 17689  | 9974  |
| 47026 | 77383  | 17073 |
| 5264  | 9229   | 2186  |
| 33285 | 34483  | 21929 |
| 1819  | 2782   | 1272  |
| 7160  | 11879  | 2849  |
| 10034 | 16364  | 3741  |
| 7488  | 10461  | 5412  |

|       |       |       |
|-------|-------|-------|
| 24842 | 41174 | 19536 |
| 5609  | 8915  | 5565  |
| 4686  | 6847  | 4857  |
| 7010  | 9115  | 5241  |
| 10691 | 15576 | 9107  |
| 731   | 1426  | 248   |
| 512   | 906   | 322   |
| 152   | 267   | 204   |
| 817   | 1631  | 727   |
| 4113  | 5731  | 4097  |
| 22770 | 38041 | 8428  |
| 1443  | 1995  | 1087  |
| 4384  | 5972  | 2966  |
| 1864  | 3507  | 1260  |
| 1052  | 1757  | 569   |
| 1032  | 1318  | 1048  |
| 23309 | 25293 | 18991 |
| 177   | 187   | 173   |
| 1796  | 2838  | 580   |
| 22899 | 40488 | 11150 |
| 164   | 280   | 250   |
| 1587  | 2315  | 1641  |
| 4511  | 7872  | 3148  |
| 3021  | 4450  | 1550  |
| 1218  | 1878  | 485   |
| 1600  | 2727  | 429   |
| 4864  | 6623  | 2764  |
| 3318  | 5460  | 2576  |
| 2368  | 3259  | 2776  |
| 298   | 458   | 109   |
| 820   | 1334  | 872   |
| 4311  | 7818  | 2721  |
| 816   | 1250  | 350   |
| 661   | 1100  | 361   |
| 147   | 177   | 217   |
| 1437  | 3024  | 1125  |
| 3851  | 6179  | 2220  |
| 157   | 296   | 294   |
| 4396  | 6787  | 1709  |
| 14703 | 25078 | 6412  |
| 616   | 753   | 588   |
| 1690  | 2527  | 274   |
| 3373  | 5425  | 1678  |
| 2542  | 3781  | 1657  |
| 231   | 380   | 186   |
| 24306 | 31566 | 5620  |
| 41    | 61    | 83    |
| 521   | 1072  | 572   |
| 256   | 523   | 187   |
| 1863  | 2619  | 587   |
| 31070 | 49313 | 25872 |



|       |        |       |
|-------|--------|-------|
| 3263  | 4643   | 4120  |
| 918   | 1503   | 103   |
| 2531  | 3081   | 773   |
| 6933  | 9240   | 2976  |
| 19303 | 37783  | 12673 |
| 3612  | 5754   | 1550  |
| 693   | 852    | 71    |
| 5944  | 8839   | 4634  |
| 43    | 95     | 93    |
| 1811  | 2631   | 1405  |
| 80875 | 128363 | 37808 |
| 7006  | 11616  | 2958  |
| 47051 | 70808  | 32962 |
| 618   | 866    | 411   |
| 295   | 508    | 219   |
| 6663  | 10095  | 2849  |
| 3921  | 5841   | 1070  |
| 4259  | 6292   | 2710  |
| 5114  | 7952   | 2629  |
| 51    | 67     | 17    |
| 4324  | 7199   | 2807  |
| 120   | 201    | 62    |
| 4908  | 8095   | 1968  |
| 1757  | 3704   | 1056  |
| 4339  | 5538   | 3109  |
| 13    | 36     | 139   |
| 1540  | 2338   | 540   |
| 2025  | 2923   | 1505  |
| 52    | 76     | 29    |
| 2477  | 4073   | 1035  |
| 1509  | 2425   | 1306  |
| 19180 | 28800  | 28445 |
| 4384  | 6962   | 1806  |
| 1676  | 2257   | 2770  |
| 181   | 390    | 233   |
| 57273 | 96378  | 22948 |
| 1688  | 3013   | 1085  |
| 2682  | 4687   | 1340  |
| 1147  | 1737   | 1278  |
| 7192  | 11860  | 3003  |
| 24240 | 39876  | 6867  |
| 1647  | 2599   | 317   |
| 415   | 520    | 533   |
| 3469  | 5453   | 2065  |
| 23180 | 39769  | 5164  |
| 6226  | 8676   | 2590  |
| 2092  | 3211   | 621   |
| 363   | 517    | 178   |
| 3558  | 6300   | 1239  |
| 1288  | 2149   | 539   |
| 13800 | 21253  | 4810  |

|        |        |        |
|--------|--------|--------|
| 3306   | 5174   | 1409   |
| 1434   | 2290   | 1477   |
| 1022   | 1423   | 888    |
| 89     | 213    | 42     |
| 3631   | 6070   | 1529   |
| 829    | 1617   | 426    |
| 2831   | 4496   | 1990   |
| 4523   | 7670   | 3143   |
| 6759   | 8565   | 4751   |
| 83     | 91     | 19     |
| 7854   | 14491  | 3148   |
| 3820   | 5449   | 3680   |
| 7183   | 11074  | 2909   |
| 96     | 101    | 251    |
| 2364   | 3433   | 724    |
| 1317   | 2178   | 1313   |
| 6843   | 10455  | 3786   |
| 387    | 615    | 305    |
| 705    | 1101   | 505    |
| 522    | 955    | 259    |
| 9117   | 14204  | 4441   |
| 574    | 815    | 608    |
| 4122   | 6634   | 2511   |
| 22656  | 42144  | 10570  |
| 777    | 949    | 277    |
| 4317   | 6488   | 2733   |
| 668    | 896    | 1007   |
| 2068   | 3450   | 1718   |
| 5196   | 8038   | 4611   |
| 2794   | 4786   | 1442   |
| 22327  | 32869  | 7630   |
| 354    | 393    | 171    |
| 747    | 1443   | 393    |
| 21860  | 33824  | 8376   |
| 19313  | 33008  | 17809  |
| 19938  | 32044  | 12699  |
| 1959   | 3508   | 1022   |
| 17506  | 30408  | 9211   |
| 7439   | 12516  | 2419   |
| 10103  | 17031  | 11112  |
| 30286  | 39905  | 40011  |
| 3205   | 5604   | 1295   |
| 13308  | 21590  | 10043  |
| 28     | 72     | 93     |
| 2173   | 3350   | 1526   |
| 4693   | 7923   | 1653   |
| 15999  | 26349  | 5541   |
| 1393   | 2235   | 1152   |
| 14541  | 24016  | 6096   |
| 100    | 89     | 159    |
| 137414 | 209990 | 147140 |

|       |       |       |
|-------|-------|-------|
| 1696  | 2188  | 335   |
| 1566  | 2240  | 1322  |
| 6070  | 9699  | 1984  |
| 25092 | 32251 | 40199 |
| 10357 | 16943 | 3697  |
| 4603  | 6866  | 1515  |
| 5214  | 8878  | 1719  |
| 4592  | 7008  | 4112  |
| 3644  | 6240  | 1085  |
| 12649 | 16859 | 21906 |
| 19    | 30    | 19    |
| 282   | 505   | 391   |
| 4016  | 6257  | 1874  |
| 258   | 514   | 172   |
| 39900 | 62463 | 27910 |
| 5473  | 8023  | 3231  |
| 3256  | 4979  | 1772  |
| 1187  | 2145  | 687   |
| 235   | 427   | 43    |
| 3028  | 4228  | 2684  |
| 1603  | 2402  | 1472  |
| 2992  | 5001  | 1122  |
| 12    | 34    | 139   |
| 5655  | 9233  | 1227  |
| 7137  | 8870  | 3871  |
| 1303  | 2110  | 1040  |
| 5320  | 8023  | 1822  |
| 3371  | 5441  | 1739  |
| 204   | 320   | 152   |
| 1988  | 3432  | 954   |
| 11583 | 18820 | 3942  |
| 3564  | 5817  | 1280  |
| 8534  | 12614 | 3095  |
| 13095 | 23009 | 6609  |
| 1757  | 3104  | 1522  |
| 42562 | 62154 | 13629 |
| 3727  | 6455  | 2645  |
| 1157  | 690   | 418   |
| 448   | 681   | 287   |
| 1509  | 3257  | 2211  |
| 7303  | 12302 | 5841  |
| 5401  | 8464  | 3819  |
| 5318  | 8371  | 4315  |
| 805   | 1139  | 228   |
| 2893  | 5648  | 1772  |
| 1771  | 2969  | 2231  |
| 213   | 218   | 177   |
| 7070  | 9908  | 2833  |
| 1650  | 2761  | 765   |
| 748   | 1417  | 482   |
| 4719  | 8156  | 2100  |

|       |       |       |
|-------|-------|-------|
| 1905  | 2683  | 861   |
| 4624  | 7749  | 1994  |
| 2517  | 4154  | 3427  |
| 13739 | 21518 | 12973 |
| 3798  | 6407  | 1332  |
| 2975  | 4584  | 1362  |
| 1803  | 2938  | 669   |
| 991   | 1697  | 638   |
| 521   | 1001  | 417   |
| 214   | 396   | 409   |
| 307   | 228   | 168   |
| 2     | 0     | 0     |
| 13408 | 20316 | 9130  |
| 1810  | 2575  | 858   |
| 4459  | 7359  | 1793  |
| 1989  | 2570  | 1290  |
| 1306  | 1662  | 1421  |
| 7594  | 12099 | 5335  |
| 47    | 64    | 61    |
| 1095  | 1858  | 582   |
| 2995  | 4967  | 1920  |
| 302   | 474   | 193   |
| 7162  | 11590 | 5298  |
| 21052 | 33285 | 7401  |
| 1904  | 2465  | 901   |
| 779   | 1151  | 668   |
| 4079  | 5213  | 4367  |
| 1948  | 2998  | 1160  |
| 571   | 920   | 272   |
| 725   | 1151  | 270   |
| 4905  | 7567  | 4363  |
| 12105 | 17854 | 9280  |
| 1074  | 2270  | 330   |
| 749   | 1367  | 208   |
| 2243  | 3685  | 1187  |
| 1665  | 2233  | 1605  |
| 1280  | 2046  | 1194  |
| 4283  | 8761  | 1083  |
| 1668  | 2588  | 2034  |
| 1997  | 3152  | 1173  |
| 2105  | 3548  | 1402  |
| 758   | 1254  | 275   |
| 1020  | 1358  | 869   |
| 5409  | 8390  | 3287  |
| 309   | 223   | 167   |
| 1857  | 3398  | 797   |
| 10947 | 18914 | 3054  |
| 5315  | 8121  | 5218  |
| 804   | 1284  | 402   |
| 10845 | 17486 | 4370  |
| 4314  | 7079  | 2112  |

|       |       |       |
|-------|-------|-------|
| 2346  | 3355  | 1993  |
| 1227  | 2157  | 529   |
| 5728  | 9506  | 2461  |
| 3664  | 5960  | 1139  |
| 67    | 105   | 0     |
| 3809  | 5583  | 2623  |
| 368   | 582   | 300   |
| 2430  | 3864  | 3113  |
| 1612  | 2706  | 575   |
| 2510  | 4135  | 864   |
| 1117  | 1611  | 365   |
| 2794  | 4070  | 1850  |
| 54969 | 85124 | 11478 |
| 5776  | 9906  | 2266  |
| 2554  | 4270  | 1976  |
| 1652  | 2895  | 729   |
| 4252  | 6594  | 4037  |
| 969   | 1725  | 366   |
| 1416  | 1677  | 1008  |
| 5831  | 6996  | 4640  |
| 15072 | 25355 | 3031  |
| 4201  | 7342  | 2544  |
| 3548  | 5469  | 815   |
| 8886  | 10369 | 9373  |
| 613   | 932   | 589   |
| 6733  | 10537 | 2988  |
| 368   | 400   | 419   |
| 397   | 498   | 404   |
| 310   | 444   | 240   |
| 7341  | 11272 | 2900  |
| 1934  | 3310  | 1090  |
| 52483 | 75936 | 11527 |
| 6825  | 11321 | 3843  |
| 2967  | 5194  | 1240  |
| 28022 | 42588 | 36546 |
| 14509 | 23877 | 7819  |
| 4885  | 7054  | 2712  |
| 9783  | 15929 | 2945  |
| 11126 | 18943 | 9424  |
| 152   | 160   | 115   |
| 2043  | 3226  | 518   |
| 5330  | 7972  | 1680  |
| 8541  | 13593 | 7177  |
| 14283 | 22345 | 4942  |
| 14792 | 24552 | 6033  |
| 2780  | 4064  | 1287  |
| 1064  | 2248  | 820   |
| 693   | 1352  | 2235  |
| 1859  | 2409  | 1855  |
| 3355  | 4996  | 1999  |
| 43512 | 72042 | 30989 |

|       |       |       |
|-------|-------|-------|
| 6241  | 10006 | 2457  |
| 1349  | 2262  | 677   |
| 3553  | 6160  | 1280  |
| 2535  | 4257  | 1080  |
| 29478 | 47364 | 15748 |
| 658   | 1101  | 408   |
| 2094  | 3338  | 1060  |
| 27    | 36    | 4     |
| 1923  | 3182  | 828   |
| 9126  | 14690 | 4169  |
| 6132  | 9311  | 4477  |
| 1575  | 2193  | 1339  |
| 597   | 881   | 705   |
| 3453  | 6416  | 3103  |
| 9383  | 15703 | 4825  |
| 4301  | 6283  | 1837  |
| 4719  | 8511  | 1847  |
| 32736 | 53887 | 13900 |
| 2465  | 4004  | 1002  |
| 2702  | 4018  | 1586  |
| 1050  | 1617  | 788   |
| 1443  | 2457  | 666   |
| 20205 | 30983 | 7010  |
| 7     | 21    | 30    |
| 1867  | 3603  | 894   |
| 656   | 836   | 855   |
| 257   | 403   | 195   |
| 7777  | 11693 | 8183  |
| 4975  | 7623  | 2741  |
| 658   | 1001  | 187   |
| 463   | 627   | 313   |
| 1071  | 1605  | 1398  |
| 714   | 985   | 486   |
| 273   | 456   | 231   |
| 2064  | 3025  | 1009  |
| 3122  | 5098  | 1572  |
| 4320  | 6746  | 2901  |
| 3112  | 5100  | 1883  |
| 4525  | 6540  | 5027  |
| 44355 | 63500 | 71495 |
| 4212  | 5673  | 3151  |
| 4973  | 7878  | 4076  |
| 1606  | 2698  | 727   |
| 2293  | 3476  | 955   |
| 81    | 196   | 49    |
| 208   | 270   | 50    |
| 377   | 567   | 145   |
| 1487  | 2442  | 1469  |
| 136   | 263   | 110   |
| 28096 | 38304 | 23708 |
| 9479  | 15171 | 3549  |

|       |        |       |
|-------|--------|-------|
| 1799  | 3054   | 1415  |
| 12449 | 19711  | 6792  |
| 392   | 354    | 229   |
| 45    | 56     | 10    |
| 1117  | 1703   | 701   |
| 2438  | 3763   | 1143  |
| 2812  | 3925   | 3564  |
| 1038  | 2044   | 552   |
| 4483  | 7554   | 1825  |
| 2742  | 4852   | 2300  |
| 1632  | 2806   | 766   |
| 3387  | 5469   | 1499  |
| 1816  | 3095   | 623   |
| 1797  | 2365   | 1038  |
| 1546  | 1992   | 1070  |
| 3138  | 4742   | 1001  |
| 2353  | 3787   | 1364  |
| 6989  | 10562  | 7998  |
| 1784  | 2945   | 925   |
| 1409  | 2429   | 852   |
| 2269  | 3228   | 1627  |
| 2838  | 5336   | 993   |
| 8475  | 15149  | 5268  |
| 4092  | 7019   | 1702  |
| 14224 | 21466  | 28111 |
| 7918  | 12945  | 3731  |
| 1578  | 2035   | 2032  |
| 4822  | 7751   | 2808  |
| 74206 | 110338 | 54163 |
| 126   | 292    | 91    |
| 4239  | 7706   | 4392  |
| 38    | 66     | 0     |
| 12277 | 18242  | 11338 |
| 1694  | 2749   | 1030  |
| 744   | 1276   | 219   |
| 136   | 205    | 102   |
| 69    | 86     | 50    |
| 2996  | 4725   | 4178  |
| 1488  | 3600   | 818   |
| 1567  | 2250   | 1086  |
| 659   | 906    | 564   |
| 7624  | 14661  | 3690  |
| 809   | 1253   | 307   |
| 3906  | 6215   | 1356  |
| 6957  | 11554  | 5427  |
| 13929 | 22951  | 6525  |
| 6432  | 10559  | 3486  |
| 5376  | 8704   | 4916  |
| 2324  | 3813   | 1255  |
| 16169 | 23546  | 4433  |
| 12143 | 19411  | 7251  |

|       |       |       |
|-------|-------|-------|
| 570   | 921   | 117   |
| 12890 | 21434 | 11726 |
| 2033  | 2839  | 1723  |
| 16077 | 26254 | 5543  |
| 3051  | 5329  | 1919  |
| 663   | 1196  | 233   |
| 971   | 1234  | 1107  |
| 272   | 450   | 52    |
| 3433  | 5399  | 1537  |
| 4922  | 8154  | 4093  |
| 5609  | 9142  | 2006  |
| 23196 | 38276 | 10631 |
| 7360  | 13117 | 4748  |
| 4510  | 6269  | 4931  |
| 9851  | 15687 | 8605  |
| 177   | 164   | 264   |
| 33877 | 51895 | 13923 |
| 6831  | 11784 | 7005  |
| 2338  | 4359  | 1714  |
| 3404  | 6071  | 1265  |
| 6106  | 9470  | 2618  |
| 3139  | 5322  | 2439  |
| 520   | 929   | 176   |
| 1158  | 1638  | 845   |
| 1073  | 1609  | 498   |
| 1321  | 1932  | 426   |
| 7790  | 11513 | 6964  |
| 4462  | 6293  | 1820  |
| 19984 | 33356 | 8262  |
| 41363 | 60741 | 38589 |
| 134   | 130   | 193   |
| 535   | 1134  | 311   |
| 1353  | 2041  | 1968  |
| 177   | 286   | 107   |
| 4730  | 7380  | 2210  |
| 3951  | 6441  | 2212  |
| 1913  | 3315  | 1320  |
| 1893  | 2852  | 953   |
| 3760  | 5309  | 2223  |
| 1614  | 2743  | 715   |
| 12691 | 22710 | 4756  |
| 998   | 1409  | 389   |
| 2710  | 4675  | 2387  |
| 71    | 162   | 50    |
| 1460  | 2196  | 647   |
| 4396  | 6321  | 4424  |
| 4535  | 7282  | 4504  |
| 1509  | 2400  | 710   |
| 5509  | 8136  | 2525  |
| 45082 | 80651 | 26517 |
| 7386  | 11369 | 2594  |



|        |        |        |
|--------|--------|--------|
| 3984   | 6762   | 2534   |
| 3813   | 6716   | 1455   |
| 12884  | 20719  | 4940   |
| 1201   | 2040   | 694    |
| 634    | 912    | 142    |
| 13047  | 20552  | 8987   |
| 92     | 90     | 79     |
| 151166 | 215105 | 177417 |
| 10041  | 15818  | 8900   |
| 16039  | 25266  | 27152  |
| 1176   | 2002   | 1324   |
| 7011   | 10390  | 5265   |
| 6329   | 9284   | 8945   |
| 21616  | 35365  | 7589   |
| 397    | 581    | 307    |
| 114846 | 196539 | 67685  |
| 14337  | 26821  | 6557   |
| 1486   | 2481   | 628    |
| 5868   | 11176  | 2939   |
| 249    | 445    | 13     |
| 1542   | 2270   | 742    |
| 3933   | 6245   | 1647   |
| 5970   | 10489  | 3592   |
| 1822   | 3087   | 949    |
| 1414   | 1989   | 934    |
| 5074   | 8783   | 3429   |
| 221    | 299    | 85     |
| 527    | 853    | 360    |
| 3320   | 5830   | 2837   |
| 878    | 1043   | 493    |
| 56069  | 94496  | 15838  |
| 973    | 1336   | 142    |
| 30299  | 45031  | 46895  |
| 15101  | 23541  | 6255   |
| 3422   | 4938   | 1789   |
| 87336  | 146132 | 37294  |
| 78631  | 114538 | 75572  |
| 942    | 1242   | 1096   |
| 30256  | 41617  | 8088   |
| 340    | 852    | 183    |
| 81292  | 111154 | 107275 |
| 1904   | 2772   | 2142   |
| 1206   | 1872   | 749    |
| 379    | 599    | 121    |
| 1639   | 2609   | 492    |
| 1533   | 2266   | 743    |
| 197    | 361    | 136    |
| 1491   | 2450   | 1415   |
| 92     | 165    | 218    |
| 2871   | 4251   | 1604   |
| 10195  | 16674  | 6026   |

|       |       |       |
|-------|-------|-------|
| 1091  | 1746  | 601   |
| 2670  | 4688  | 2311  |
| 541   | 704   | 336   |
| 20    | 40    | 23    |
| 20    | 40    | 23    |
| 20    | 40    | 23    |
| 8583  | 13839 | 4912  |
| 1739  | 2781  | 563   |
| 23667 | 34147 | 17416 |
| 4660  | 7846  | 2621  |
| 2857  | 4917  | 2070  |
| 2482  | 4048  | 1455  |
| 2012  | 3355  | 615   |
| 2824  | 4197  | 1822  |
| 951   | 1503  | 277   |
| 20886 | 27624 | 11754 |
| 1047  | 1606  | 1129  |
| 1515  | 2440  | 948   |
| 7988  | 11356 | 8246  |
| 2629  | 4582  | 999   |
| 212   | 338   | 30    |
| 707   | 1077  | 425   |
| 679   | 1188  | 176   |
| 1551  | 2658  | 768   |
| 10410 | 16543 | 16142 |
| 402   | 468   | 265   |
| 71    | 127   | 24    |
| 1217  | 2174  | 1030  |
| 4311  | 6296  | 3068  |
| 1407  | 1998  | 962   |
| 157   | 181   | 101   |
| 990   | 1566  | 288   |
| 1437  | 2372  | 854   |
| 8110  | 13883 | 6936  |
| 10639 | 17728 | 4484  |
| 11    | 2     | 6     |
| 6599  | 10762 | 2349  |
| 3348  | 6070  | 3957  |
| 10549 | 18117 | 9116  |
| 2896  | 4079  | 1928  |
| 2726  | 4895  | 2009  |
| 1271  | 2215  | 427   |
| 1145  | 1620  | 251   |
| 3520  | 5342  | 1817  |
| 1093  | 1618  | 431   |
| 1912  | 2735  | 1664  |
| 3026  | 4712  | 2093  |
| 3069  | 4343  | 956   |
| 9333  | 13125 | 3277  |
| 1178  | 2031  | 636   |
| 9074  | 15500 | 4113  |

|       |       |       |
|-------|-------|-------|
| 3667  | 7303  | 1030  |
| 4248  | 7566  | 2161  |
| 995   | 1701  | 598   |
| 3524  | 4930  | 1698  |
| 6368  | 10241 | 4428  |
| 469   | 731   | 247   |
| 91    | 117   | 25    |
| 7752  | 16388 | 6581  |
| 3994  | 6309  | 1781  |
| 80    | 153   | 21    |
| 15658 | 22263 | 11230 |
| 7145  | 11233 | 3006  |
| 10925 | 17260 | 8069  |
| 3523  | 5571  | 1718  |
| 6016  | 9973  | 2995  |
| 2753  | 4779  | 983   |
| 694   | 1171  | 300   |
| 1511  | 2723  | 754   |
| 7459  | 12391 | 3171  |
| 1818  | 3282  | 1261  |
| 2814  | 4563  | 2081  |
| 878   | 1488  | 485   |
| 53    | 63    | 32    |
| 1360  | 1748  | 399   |
| 2699  | 4146  | 1480  |
| 11586 | 17546 | 5282  |
| 2808  | 4934  | 1519  |
| 7583  | 10400 | 4662  |
| 1268  | 1905  | 776   |
| 11583 | 16401 | 4530  |
| 8391  | 13049 | 7016  |
| 1246  | 1775  | 701   |
| 3110  | 3756  | 2997  |
| 1436  | 2109  | 927   |
| 5991  | 8707  | 2729  |
| 2183  | 3119  | 2000  |
| 4095  | 6446  | 2869  |
| 12    | 19    | 3     |
| 13726 | 22262 | 11436 |
| 4499  | 7661  | 2237  |
| 487   | 666   | 1006  |
| 3940  | 5927  | 1488  |
| 6029  | 9705  | 7163  |
| 329   | 480   | 263   |
| 5642  | 7753  | 3389  |
| 660   | 1147  | 428   |
| 19103 | 28825 | 11478 |
| 270   | 355   | 57    |
| 604   | 1071  | 299   |
| 2876  | 3914  | 1668  |
| 799   | 1411  | 273   |

|       |       |       |
|-------|-------|-------|
| 6096  | 9507  | 3476  |
| 2367  | 3879  | 2089  |
| 84    | 132   | 22    |
| 21247 | 34567 | 11953 |
| 3066  | 4640  | 2456  |
| 899   | 1369  | 634   |
| 15652 | 24979 | 7653  |
| 14807 | 23019 | 13149 |
| 2045  | 3609  | 806   |
| 11029 | 17193 | 6102  |
| 615   | 1045  | 195   |
| 3267  | 5832  | 1950  |
| 15497 | 28089 | 10946 |
| 372   | 627   | 218   |
| 4320  | 7218  | 3045  |
| 8339  | 13190 | 2772  |
| 2163  | 3436  | 727   |
| 4243  | 6507  | 3363  |
| 1994  | 2812  | 795   |
| 544   | 847   | 251   |
| 5162  | 8358  | 2356  |
| 2296  | 3777  | 2093  |
| 2008  | 3500  | 2657  |
| 2332  | 3422  | 1236  |
| 890   | 1321  | 519   |
| 2012  | 2850  | 855   |
| 854   | 1498  | 371   |
| 1723  | 3291  | 671   |
| 2274  | 4150  | 1172  |
| 4330  | 7087  | 1708  |
| 18123 | 25204 | 12513 |
| 4577  | 7272  | 2655  |
| 3000  | 4451  | 2575  |
| 694   | 948   | 270   |
| 40413 | 65926 | 13812 |
| 1388  | 2149  | 633   |
| 81    | 119   | 0     |
| 33175 | 52812 | 17179 |
| 25951 | 38629 | 26409 |
| 679   | 1026  | 263   |
| 70    | 92    | 58    |
| 4316  | 7034  | 1598  |
| 2630  | 4309  | 1069  |
| 29957 | 46997 | 10976 |
| 16666 | 27381 | 12310 |
| 1421  | 2345  | 971   |
| 2272  | 3315  | 1047  |
| 233   | 511   | 161   |
| 911   | 1321  | 554   |
| 61463 | 95846 | 22803 |
| 229   | 397   | 251   |

|       |       |       |
|-------|-------|-------|
| 549   | 751   | 238   |
| 49654 | 87933 | 30373 |
| 3033  | 3713  | 1962  |
| 1231  | 2068  | 1580  |
| 900   | 1417  | 691   |
| 2727  | 4588  | 1691  |
| 2246  | 3908  | 1016  |
| 661   | 1270  | 456   |
| 10792 | 16763 | 3450  |
| 322   | 451   | 92    |
| 27545 | 44662 | 7612  |
| 470   | 823   | 323   |
| 2117  | 3521  | 883   |
| 5377  | 9083  | 2128  |
| 959   | 1512  | 709   |
| 99    | 210   | 186   |
| 36    | 74    | 35    |
| 1420  | 2303  | 600   |
| 3738  | 6388  | 2440  |
| 587   | 745   | 112   |
| 22287 | 32772 | 11838 |
| 642   | 1157  | 384   |
| 26027 | 38740 | 13688 |
| 191   | 293   | 101   |
| 1990  | 3206  | 771   |
| 239   | 447   | 216   |
| 8875  | 12770 | 4859  |
| 1     | 4     | 0     |
| 15    | 40    | 0     |
| 41854 | 74159 | 24095 |
| 1685  | 2615  | 1539  |
| 2732  | 4875  | 833   |
| 7117  | 13358 | 13824 |
| 3248  | 5214  | 1670  |
| 874   | 1374  | 363   |
| 3244  | 5508  | 1381  |
| 890   | 1260  | 1471  |
| 5465  | 9174  | 1865  |
| 699   | 1152  | 284   |
| 1476  | 2308  | 1008  |
| 1041  | 1548  | 599   |
| 179   | 241   | 84    |
| 951   | 1599  | 821   |
| 2564  | 3976  | 1292  |
| 6401  | 10000 | 4445  |
| 4592  | 7085  | 1951  |
| 2573  | 3794  | 1650  |
| 13047 | 22452 | 6996  |
| 6391  | 9620  | 1812  |
| 605   | 985   | 541   |
| 1369  | 2666  | 814   |

|       |       |       |
|-------|-------|-------|
| 339   | 578   | 208   |
| 1936  | 3691  | 768   |
| 8750  | 13952 | 3332  |
| 1145  | 1461  | 1644  |
| 2158  | 4279  | 969   |
| 7     | 3     | 8     |
| 1656  | 2327  | 950   |
| 2743  | 4202  | 1425  |
| 721   | 1333  | 628   |
| 519   | 526   | 286   |
| 237   | 493   | 114   |
| 1043  | 1642  | 903   |
| 6623  | 11822 | 3037  |
| 840   | 1380  | 631   |
| 2780  | 5011  | 2389  |
| 208   | 342   | 196   |
| 1270  | 1736  | 719   |
| 11    | 19    | 2     |
| 6852  | 10555 | 3341  |
| 366   | 563   | 172   |
| 2482  | 3890  | 1139  |
| 14892 | 25516 | 4326  |
| 934   | 1519  | 844   |
| 28193 | 39755 | 23607 |
| 765   | 1123  | 728   |

| foldChange  | log2FoldChange | pval      | padj      |
|-------------|----------------|-----------|-----------|
| 18.99549679 | 4.247585538    | 1.61E-145 | 2.26E-141 |
| 24.0827984  | 4.589931137    | 1.02E-130 | 7.17E-127 |
| 18.95466776 | 4.244481264    | 8.12E-108 | 3.81E-104 |
| 11.02115487 | 3.462203502    | 6.86E-89  | 2.41E-85  |
| 39.0560077  | 5.28747258     | 3.01E-73  | 8.47E-70  |
| 4.410425537 | 2.14091786     | 8.44E-48  | 1.98E-44  |
| 0.19603009  | -2.350852973   | 6.54E-47  | 1.32E-43  |
| 0.214990318 | -2.217656405   | 1.13E-45  | 1.98E-42  |
| 0.208398181 | -2.262585408   | 7.43E-44  | 1.16E-40  |
| 4.256934819 | 2.089815       | 3.95E-40  | 5.56E-37  |
| 4.491645344 | 2.167244018    | 1.19E-39  | 1.52E-36  |
| 0.174761492 | -2.516540771   | 6.04E-39  | 7.08E-36  |
| 4.017456585 | 2.006282433    | 1.76E-38  | 1.85E-35  |
| 0.206254959 | -2.277499288   | 1.84E-38  | 1.85E-35  |
| 0.184517294 | -2.438172051   | 1.27E-37  | 1.19E-34  |
| 5.637587938 | 2.495078032    | 6.80E-37  | 5.98E-34  |
| 5.435233244 | 2.442341948    | 1.02E-36  | 8.49E-34  |
| 0.252577426 | -1.985202391   | 1.44E-36  | 1.12E-33  |
| 17.73127424 | 4.148224313    | 8.56E-36  | 6.34E-33  |
| 3.516969904 | 1.81433299     | 5.28E-35  | 3.71E-32  |
| 0.298480394 | -1.744291925   | 5.89E-35  | 3.95E-32  |
| 0.214850408 | -2.218595581   | 8.39E-35  | 5.37E-32  |
| 0.222307646 | -2.169370527   | 1.43E-34  | 8.78E-32  |
| 3.39718923  | 1.764341582    | 1.96E-33  | 1.15E-30  |
| 3.543965264 | 1.825364464    | 2.11E-33  | 1.19E-30  |
| 0.281549043 | -1.828541848   | 3.85E-33  | 2.08E-30  |
| 0.325373934 | -1.619829413   | 4.69E-33  | 2.45E-30  |
| 0.169817254 | -2.557945043   | 1.26E-31  | 6.36E-29  |
| 3.497687941 | 1.80640158     | 2.25E-31  | 1.09E-28  |
| 3.55958691  | 1.831709826    | 9.75E-31  | 4.58E-28  |
| 8.490685153 | 3.085880976    | 1.31E-30  | 5.94E-28  |
| 3.161964492 | 1.660821167    | 7.87E-30  | 3.46E-27  |
| 3.324930299 | 1.733324098    | 4.49E-29  | 1.91E-26  |
| 0.345978469 | -1.531245834   | 2.60E-28  | 1.08E-25  |
| 0.252594952 | -1.98510229    | 3.25E-28  | 1.31E-25  |
| 0.311965405 | -1.680542041   | 1.20E-27  | 4.71E-25  |
| 0.322439274 | -1.632900615   | 1.41E-25  | 5.37E-23  |
| 2.976440255 | 1.573587936    | 1.90E-25  | 7.03E-23  |
| 2.897891571 | 1.535003615    | 2.00E-25  | 7.22E-23  |
| 2.902591539 | 1.537341566    | 1.74E-24  | 6.13E-22  |
| 0.377887156 | -1.40397261    | 2.09E-24  | 7.18E-22  |
| 0.334282677 | -1.580859502   | 2.29E-24  | 7.50E-22  |
| 2.82127715  | 1.496348397    | 2.27E-24  | 7.50E-22  |
| 0.367531434 | -1.44406045    | 3.39E-23  | 1.08E-20  |
| 0.39023631  | -1.357580073   | 3.79E-23  | 1.19E-20  |
| 2.653494845 | 1.407893746    | 9.60E-23  | 2.94E-20  |
| 5.663612664 | 2.501722602    | 1.55E-22  | 4.65E-20  |
| 0.430033128 | -1.217480293   | 2.76E-22  | 8.09E-20  |
| 0.280208077 | -1.835429555   | 5.32E-22  | 1.53E-19  |
| 0.392076953 | -1.350791254   | 6.27E-22  | 1.77E-19  |

|             |              |          |          |
|-------------|--------------|----------|----------|
| 0.282113414 | -1.825652829 | 6.68E-22 | 1.84E-19 |
| 0.348681736 | -1.520017299 | 3.82E-21 | 1.03E-18 |
| 3.558559125 | 1.831293206  | 5.66E-21 | 1.50E-18 |
| 3.834832424 | 1.939163536  | 6.83E-21 | 1.78E-18 |
| 4.073000849 | 2.026092115  | 1.45E-20 | 3.72E-18 |
| 15.50395978 | 3.954564828  | 3.05E-20 | 7.66E-18 |
| 0.424448528 | -1.236338484 | 5.91E-20 | 1.46E-17 |
| 0.361784383 | -1.466797964 | 6.44E-20 | 1.56E-17 |
| 2.494366252 | 1.318673314  | 7.86E-20 | 1.88E-17 |
| 0.348059687 | -1.522593366 | 9.42E-20 | 2.21E-17 |
| 2.594895851 | 1.375676635  | 1.12E-19 | 2.57E-17 |
| 2.534138534 | 1.341495395  | 2.09E-19 | 4.75E-17 |
| 0.296319574 | -1.754774166 | 2.32E-19 | 5.18E-17 |
| 2.487983119 | 1.314976697  | 4.38E-19 | 9.63E-17 |
| 0.258744805 | -1.950398197 | 5.03E-19 | 1.09E-16 |
| 2.878632299 | 1.525383519  | 9.38E-19 | 2.00E-16 |
| 2.648106008 | 1.404960877  | 1.06E-18 | 2.24E-16 |
| 2.378179721 | 1.249857745  | 1.47E-18 | 3.03E-16 |
| 2.42918171  | 1.280470412  | 1.62E-18 | 3.31E-16 |
| 0.361509825 | -1.46789324  | 1.77E-18 | 3.57E-16 |
| 0.45110927  | -1.148451161 | 1.96E-18 | 3.89E-16 |
| 0.301106762 | -1.731652987 | 3.26E-18 | 6.37E-16 |
| 0.326057935 | -1.616799765 | 3.51E-18 | 6.76E-16 |
| 5.995828393 | 2.583959093  | 3.55E-18 | 6.76E-16 |
| 0.139118021 | -2.845618784 | 3.79E-18 | 7.11E-16 |
| 0.351912203 | -1.506712552 | 5.23E-18 | 9.68E-16 |
| 2.42847765  | 1.280052209  | 8.26E-18 | 1.51E-15 |
| 0.372253141 | -1.425644074 | 1.24E-17 | 2.23E-15 |
| 0.211167725 | -2.243538745 | 2.14E-17 | 3.82E-15 |
| 0.246456571 | -2.020594651 | 3.09E-17 | 5.38E-15 |
| 0.193696957 | -2.368126805 | 3.09E-17 | 5.38E-15 |
| 0.270404838 | -1.886807132 | 5.94E-17 | 1.02E-14 |
| 0.375881893 | -1.411648674 | 6.41E-17 | 1.09E-14 |
| 0.443547322 | -1.172840061 | 8.04E-17 | 1.35E-14 |
| 2.510965836 | 1.3282424    | 8.15E-17 | 1.35E-14 |
| 0.441379281 | -1.179909187 | 9.14E-17 | 1.50E-14 |
| 0.400591295 | -1.319797025 | 1.18E-16 | 1.91E-14 |
| 0.421208728 | -1.247392764 | 1.26E-16 | 2.02E-14 |
| 3.183190438 | 1.67047347   | 1.38E-16 | 2.19E-14 |
| 2.897215524 | 1.534667011  | 1.66E-16 | 2.60E-14 |
| 0.36345381  | -1.460156067 | 1.70E-16 | 2.63E-14 |
| 0.437947725 | -1.191169421 | 1.77E-16 | 2.70E-14 |
| 0.380956286 | -1.392302635 | 2.89E-16 | 4.38E-14 |
| 0.449638232 | -1.153163383 | 2.93E-16 | 4.40E-14 |
| 0.404076553 | -1.307299453 | 4.58E-16 | 6.79E-14 |
| 0.381474364 | -1.390341987 | 5.98E-16 | 8.76E-14 |
| 0.352007029 | -1.506323856 | 6.54E-16 | 9.49E-14 |
| 2.531094287 | 1.339761251  | 7.28E-16 | 1.05E-13 |
| 0.447772619 | -1.159161785 | 9.90E-16 | 1.41E-13 |
| 2.248695616 | 1.169088391  | 1.03E-15 | 1.45E-13 |
| 2.306911907 | 1.205962913  | 2.02E-15 | 2.82E-13 |



|             |              |          |          |
|-------------|--------------|----------|----------|
| 2.948903747 | 1.560178733  | 2.19E-15 | 3.02E-13 |
| 2.216109651 | 1.148029267  | 2.74E-15 | 3.75E-13 |
| 0.412687279 | -1.276879127 | 4.59E-15 | 6.22E-13 |
| 2.175946416 | 1.12164303   | 4.73E-15 | 6.34E-13 |
| 2.621245741 | 1.390252612  | 5.63E-15 | 7.48E-13 |
| 2.77789962  | 1.473994468  | 8.20E-15 | 1.08E-12 |
| 2.301570931 | 1.202618905  | 8.95E-15 | 1.17E-12 |
| 2.600040355 | 1.378534016  | 1.18E-14 | 1.52E-12 |
| 0.462268637 | -1.113196609 | 2.13E-14 | 2.72E-12 |
| 3.072245334 | 1.619293427  | 2.95E-14 | 3.74E-12 |
| 0.299971458 | -1.737102857 | 4.07E-14 | 5.12E-12 |
| 2.354698994 | 1.235542649  | 5.35E-14 | 6.67E-12 |
| 0.372568667 | -1.424421747 | 6.04E-14 | 7.46E-12 |
| 0.212775184 | -2.232598199 | 6.72E-14 | 8.23E-12 |
| 0.433761078 | -1.20502749  | 9.56E-14 | 1.16E-11 |
| 2.099987486 | 1.070380731  | 1.03E-13 | 1.24E-11 |
| 2.249989863 | 1.169918502  | 1.05E-13 | 1.25E-11 |
| 2.149713952 | 1.104144703  | 1.20E-13 | 1.42E-11 |
| 0.452458271 | -1.144143351 | 1.41E-13 | 1.66E-11 |
| 0.379523547 | -1.397738697 | 1.76E-13 | 2.04E-11 |
| 2.585203481 | 1.37027784   | 1.84E-13 | 2.12E-11 |
| 0.394019147 | -1.343662356 | 2.44E-13 | 2.80E-11 |
| 0.385071565 | -1.376801501 | 2.56E-13 | 2.91E-11 |
| 2.072098119 | 1.05109232   | 3.54E-13 | 3.99E-11 |
| 0.471977184 | -1.083210976 | 4.56E-13 | 5.09E-11 |
| 0.025370373 | -5.300711479 | 4.71E-13 | 5.18E-11 |
| 0.201418797 | -2.311729766 | 4.69E-13 | 5.18E-11 |
| 2.18255623  | 1.126018823  | 5.43E-13 | 5.93E-11 |
| 3.427244285 | 1.777049027  | 7.36E-13 | 7.97E-11 |
| 2.086242952 | 1.060907176  | 7.43E-13 | 7.99E-11 |
| 0.388224846 | -1.365035644 | 8.67E-13 | 9.24E-11 |
| 0.455132172 | -1.135642525 | 8.99E-13 | 9.51E-11 |
| 0.501892219 | -0.994550516 | 1.33E-12 | 1.39E-10 |
| 0.505280326 | -0.984844088 | 1.34E-12 | 1.40E-10 |
| 0.459298154 | -1.12249711  | 1.43E-12 | 1.48E-10 |
| 0.485425775 | -1.04267738  | 1.50E-12 | 1.54E-10 |
| 0.482686072 | -1.050842896 | 2.27E-12 | 2.32E-10 |
| 2.169141636 | 1.117124258  | 2.60E-12 | 2.63E-10 |
| 2.102978576 | 1.072434153  | 2.95E-12 | 2.97E-10 |
| 2.06096852  | 1.043322468  | 3.30E-12 | 3.30E-10 |
| 1.999530633 | 0.999661384  | 3.39E-12 | 3.36E-10 |
| 2.044437911 | 1.031704249  | 4.81E-12 | 4.73E-10 |
| 2.04174582  | 1.029803274  | 5.17E-12 | 5.05E-10 |
| 2.066389343 | 1.047112108  | 5.69E-12 | 5.52E-10 |
| 2.255448528 | 1.173414362  | 6.73E-12 | 6.49E-10 |
| 1.973311369 | 0.980618617  | 8.80E-12 | 8.37E-10 |
| 1.900636902 | 0.926482945  | 8.74E-12 | 8.37E-10 |
| 2.04324445  | 1.030861816  | 8.89E-12 | 8.40E-10 |
| 0.311452106 | -1.682917768 | 1.07E-11 | 9.98E-10 |
| 2.081236204 | 1.057440709  | 1.06E-11 | 9.98E-10 |
| 0.539698854 | -0.889773472 | 1.17E-11 | 1.08E-09 |

|             |              |          |          |
|-------------|--------------|----------|----------|
| 0.436283295 | -1.196662859 | 1.46E-11 | 1.34E-09 |
| 2.073358757 | 1.05196977   | 1.67E-11 | 1.52E-09 |
| 0.39635593  | -1.335131533 | 1.70E-11 | 1.54E-09 |
| 0.556835192 | -0.844677702 | 1.74E-11 | 1.57E-09 |
| 0.102902541 | -3.280649486 | 1.86E-11 | 1.67E-09 |
| 0.243037963 | -2.040746411 | 1.92E-11 | 1.71E-09 |
| 0.489695168 | -1.030044135 | 2.23E-11 | 1.98E-09 |
| 0.281061636 | -1.831041548 | 2.46E-11 | 2.17E-09 |
| 0.502122536 | -0.993888618 | 2.56E-11 | 2.24E-09 |
| 5.2459617   | 2.391207275  | 2.60E-11 | 2.26E-09 |
| 0.507845576 | -0.977538222 | 2.87E-11 | 2.48E-09 |
| 1.998304957 | 0.998776766  | 3.65E-11 | 3.14E-09 |
| 2.044563054 | 1.031792556  | 3.92E-11 | 3.35E-09 |
| 0.460513872 | -1.118683478 | 4.10E-11 | 3.47E-09 |
| 0.537613311 | -0.895359236 | 4.59E-11 | 3.87E-09 |
| 0.473093164 | -1.079803781 | 5.16E-11 | 4.32E-09 |
| 0.405097724 | -1.303658116 | 5.80E-11 | 4.83E-09 |
| 0.437047082 | -1.19413939  | 5.92E-11 | 4.86E-09 |
| 0.41607319  | -1.265090764 | 5.92E-11 | 4.86E-09 |
| 2.030391792 | 1.021758142  | 5.93E-11 | 4.86E-09 |
| 2.312023234 | 1.209155896  | 7.23E-11 | 5.89E-09 |
| 0.52465578  | -0.930556894 | 7.67E-11 | 6.21E-09 |
| 0.491244834 | -1.02548586  | 7.78E-11 | 6.26E-09 |
| 0.375635372 | -1.412595172 | 8.03E-11 | 6.42E-09 |
| 2.417325251 | 1.273411601  | 8.18E-11 | 6.51E-09 |
| 0.491380534 | -1.025087389 | 8.35E-11 | 6.60E-09 |
| 2.548400572 | 1.349592066  | 9.78E-11 | 7.69E-09 |
| 0.529408794 | -0.917545934 | 1.06E-10 | 8.28E-09 |
| 0.466618036 | -1.099686024 | 1.12E-10 | 8.69E-09 |
| 2.251200772 | 1.170694729  | 1.27E-10 | 9.74E-09 |
| 0.494476238 | -1.0160269   | 1.26E-10 | 9.74E-09 |
| 2.360177491 | 1.238895358  | 1.43E-10 | 1.09E-08 |
| 0.537534375 | -0.895571079 | 1.53E-10 | 1.17E-08 |
| 1.869557077 | 0.902696517  | 1.56E-10 | 1.18E-08 |
| 0.42990013  | -1.217926548 | 1.67E-10 | 1.25E-08 |
| 0.55724918  | -0.843605505 | 1.76E-10 | 1.32E-08 |
| 0.539616487 | -0.889993666 | 1.96E-10 | 1.46E-08 |
| 1.894967528 | 0.922173127  | 2.01E-10 | 1.49E-08 |
| 2.006344703 | 1.004569492  | 2.24E-10 | 1.65E-08 |
| 1.907377404 | 0.931590332  | 2.27E-10 | 1.67E-08 |
| 0.547241747 | -0.869749803 | 2.36E-10 | 1.73E-08 |
| 0.49758717  | -1.006978809 | 2.47E-10 | 1.79E-08 |
| 0.495584539 | -1.012796915 | 2.59E-10 | 1.87E-08 |
| 0.56123852  | -0.833314064 | 2.66E-10 | 1.89E-08 |
| 0.541848558 | -0.884038407 | 2.66E-10 | 1.89E-08 |
| 0.432502923 | -1.209218213 | 2.64E-10 | 1.89E-08 |
| 1.909758618 | 0.933390302  | 2.74E-10 | 1.94E-08 |
| 0.562638123 | -0.829720786 | 3.40E-10 | 2.39E-08 |
| 0.630788706 | -0.664771265 | 3.44E-10 | 2.41E-08 |
| 0.495726046 | -1.012385034 | 3.82E-10 | 2.66E-08 |
| 0.527571208 | -0.922562262 | 3.84E-10 | 2.67E-08 |

|             |              |          |          |
|-------------|--------------|----------|----------|
| 1.9020832   | 0.927580353  | 3.87E-10 | 2.67E-08 |
| 0.44074767  | -1.181975152 | 3.92E-10 | 2.69E-08 |
| 3.981245427 | 1.99321981   | 4.26E-10 | 2.91E-08 |
| 0.552455131 | -0.856070797 | 4.89E-10 | 3.32E-08 |
| 0.436350305 | -1.196441288 | 5.24E-10 | 3.55E-08 |
| 0.552085752 | -0.857035726 | 6.18E-10 | 4.16E-08 |
| 1.82006901  | 0.863993153  | 6.52E-10 | 4.37E-08 |
| 0.336973219 | -1.569294157 | 6.65E-10 | 4.44E-08 |
| 0.559576579 | -0.837592514 | 6.83E-10 | 4.54E-08 |
| 0.467988346 | -1.095455491 | 7.27E-10 | 4.80E-08 |
| 0.437111565 | -1.193926545 | 8.25E-10 | 5.43E-08 |
| 7.386023387 | 2.884797831  | 8.38E-10 | 5.49E-08 |
| 0.538257402 | -0.893631841 | 8.44E-10 | 5.50E-08 |
| 0.518286035 | -0.948179573 | 9.17E-10 | 5.95E-08 |
| 3.08621743  | 1.625839706  | 9.62E-10 | 6.21E-08 |
| 0.54157427  | -0.884768896 | 9.90E-10 | 6.36E-08 |
| 0.518559473 | -0.947418634 | 1.00E-09 | 6.40E-08 |
| 2.024953309 | 1.017888643  | 1.31E-09 | 8.34E-08 |
| 0.387342702 | -1.368317538 | 1.33E-09 | 8.46E-08 |
| 1.794444158 | 0.843537028  | 1.36E-09 | 8.61E-08 |
| 0.494438657 | -1.016136553 | 1.44E-09 | 9.05E-08 |
| 1.830472013 | 0.872215715  | 1.46E-09 | 9.14E-08 |
| 0.536016873 | -0.899649679 | 1.48E-09 | 9.20E-08 |
| 0.508939341 | -0.97443438  | 1.71E-09 | 1.06E-07 |
| 0.523468371 | -0.933825725 | 1.79E-09 | 1.10E-07 |
| 0.549056865 | -0.86497252  | 2.21E-09 | 1.36E-07 |
| 0.242888859 | -2.041631777 | 2.39E-09 | 1.46E-07 |
| 0.543539598 | -0.879542952 | 2.42E-09 | 1.47E-07 |
| 0.469741835 | -1.090060011 | 2.58E-09 | 1.57E-07 |
| 1.886033902 | 0.915355609  | 2.77E-09 | 1.67E-07 |
| 0.523703459 | -0.933177962 | 2.92E-09 | 1.76E-07 |
| 1.802876281 | 0.850300398  | 3.34E-09 | 2.00E-07 |
| 1.938055027 | 0.954609533  | 3.63E-09 | 2.17E-07 |
| 0.501732291 | -0.995010304 | 3.69E-09 | 2.19E-07 |
| 1.920450369 | 0.94144468   | 3.83E-09 | 2.26E-07 |
| 0.533172792 | -0.907324933 | 3.86E-09 | 2.28E-07 |
| 0.528702084 | -0.91947308  | 4.14E-09 | 2.43E-07 |
| 0.56759623  | -0.817063087 | 4.51E-09 | 2.63E-07 |
| 2.321783827 | 1.215233654  | 5.03E-09 | 2.93E-07 |
| 1.892475174 | 0.920274374  | 5.34E-09 | 3.09E-07 |
| 0.547137329 | -0.870025107 | 5.84E-09 | 3.37E-07 |
| 0.600963442 | -0.734650864 | 6.36E-09 | 3.66E-07 |
| 1.867184172 | 0.900864236  | 7.31E-09 | 4.19E-07 |
| 0.537815863 | -0.894815786 | 7.36E-09 | 4.20E-07 |
| 1.781292592 | 0.832924511  | 7.72E-09 | 4.38E-07 |
| 0.541942272 | -0.883788912 | 7.93E-09 | 4.49E-07 |
| 0.59553814  | -0.747734189 | 9.13E-09 | 5.14E-07 |
| 0.436612588 | -1.195574371 | 9.32E-09 | 5.23E-07 |
| 2.929970253 | 1.550886017  | 1.07E-08 | 5.98E-07 |
| 0.537810279 | -0.894830766 | 1.07E-08 | 5.98E-07 |
| 0.523931737 | -0.93254924  | 1.08E-08 | 5.98E-07 |

|             |              |          |          |
|-------------|--------------|----------|----------|
| 1.821914783 | 0.865455481  | 1.21E-08 | 6.70E-07 |
| 0.53826258  | -0.893617963 | 1.23E-08 | 6.76E-07 |
| 2.242186905 | 1.164906544  | 1.26E-08 | 6.88E-07 |
| 0.557601554 | -0.842693513 | 1.31E-08 | 7.15E-07 |
| 0.482945025 | -1.050069123 | 1.45E-08 | 7.90E-07 |
| 0.494974739 | -1.014573195 | 1.53E-08 | 8.26E-07 |
| 0.5679888   | -0.816065613 | 1.63E-08 | 8.75E-07 |
| 0.526571759 | -0.925297947 | 1.62E-08 | 8.75E-07 |
| 0.567771907 | -0.816616628 | 1.69E-08 | 9.03E-07 |
| 0.568814412 | -0.813970077 | 1.70E-08 | 9.04E-07 |
| 1.778169017 | 0.83039246   | 1.72E-08 | 9.15E-07 |
| 2.01741375  | 1.012506995  | 1.76E-08 | 9.34E-07 |
| 1.855595051 | 0.891881904  | 1.79E-08 | 9.46E-07 |
| 0.342362738 | -1.546402406 | 1.87E-08 | 9.82E-07 |
| 1.847229658 | 0.885363242  | 1.93E-08 | 1.01E-06 |
| 1.79127754  | 0.840988885  | 2.00E-08 | 1.04E-06 |
| 1.772809512 | 0.826037527  | 2.08E-08 | 1.08E-06 |
| 0.446344848 | -1.16376932  | 2.44E-08 | 1.26E-06 |
| 0.549291073 | -0.864357248 | 2.62E-08 | 1.35E-06 |
| 1.792545831 | 0.842010006  | 2.73E-08 | 1.40E-06 |
| 1.787378289 | 0.837845005  | 3.10E-08 | 1.59E-06 |
| 3.638315978 | 1.863270842  | 3.15E-08 | 1.61E-06 |
| 1.853535711 | 0.890279911  | 3.54E-08 | 1.80E-06 |
| 0.551740426 | -0.857938404 | 3.54E-08 | 1.80E-06 |
| 0.572532307 | -0.804570991 | 3.59E-08 | 1.81E-06 |
| 0.578342736 | -0.790003382 | 3.94E-08 | 1.98E-06 |
| 1.675100274 | 0.74424746   | 4.56E-08 | 2.29E-06 |
| 0.607715091 | -0.718532976 | 4.72E-08 | 2.36E-06 |
| 0.550209687 | -0.861946555 | 4.78E-08 | 2.38E-06 |
| 0.443397977 | -1.173325906 | 4.81E-08 | 2.38E-06 |
| 0.63448433  | -0.656343562 | 4.84E-08 | 2.39E-06 |
| 0.543696998 | -0.879125231 | 5.08E-08 | 2.50E-06 |
| 0.508515635 | -0.975635962 | 5.25E-08 | 2.58E-06 |
| 0.510268603 | -0.970671221 | 5.29E-08 | 2.58E-06 |
| 0.584611731 | -0.774449316 | 5.29E-08 | 2.58E-06 |
| 1.780995874 | 0.832684174  | 5.41E-08 | 2.62E-06 |
| 0.528945531 | -0.918808929 | 5.45E-08 | 2.64E-06 |
| 1.678504861 | 0.747176715  | 5.52E-08 | 2.66E-06 |
| 0.594986148 | -0.749072014 | 5.85E-08 | 2.80E-06 |
| 1.773345261 | 0.826473449  | 5.84E-08 | 2.80E-06 |
| 1.784304736 | 0.83536203   | 6.00E-08 | 2.86E-06 |
| 0.538547418 | -0.892854717 | 6.06E-08 | 2.88E-06 |
| 0.559368992 | -0.838127813 | 6.55E-08 | 3.11E-06 |
| 2.03626091  | 1.025922429  | 6.61E-08 | 3.12E-06 |
| 0.553553434 | -0.85320551  | 6.69E-08 | 3.15E-06 |
| 1.716609593 | 0.779561965  | 6.89E-08 | 3.24E-06 |
| 0.537552815 | -0.895521587 | 7.23E-08 | 3.38E-06 |
| 0.538507759 | -0.892960963 | 7.47E-08 | 3.48E-06 |
| 0.556289789 | -0.846091471 | 7.49E-08 | 3.48E-06 |
| 3.828170937 | 1.936655251  | 7.79E-08 | 3.61E-06 |
| 0.467873786 | -1.095808696 | 8.26E-08 | 3.81E-06 |

|             |              |          |          |
|-------------|--------------|----------|----------|
| 0.57303146  | -0.803313747 | 8.67E-08 | 3.99E-06 |
| 1.838761289 | 0.878734199  | 9.79E-08 | 4.49E-06 |
| 1.719807141 | 0.78224679   | 1.05E-07 | 4.80E-06 |
| 0.033979525 | -4.879190519 | 1.07E-07 | 4.85E-06 |
| 0.481730447 | -1.053701984 | 1.12E-07 | 5.08E-06 |
| 2.147676806 | 1.102776905  | 1.13E-07 | 5.10E-06 |
| 1.750616438 | 0.807863022  | 1.19E-07 | 5.37E-06 |
| 2.059434848 | 1.042248486  | 1.21E-07 | 5.44E-06 |
| 0.554179545 | -0.851574634 | 1.22E-07 | 5.48E-06 |
| 0.579156992 | -0.787973623 | 1.46E-07 | 6.54E-06 |
| 0.566399982 | -0.820106875 | 1.48E-07 | 6.60E-06 |
| 0.533646811 | -0.90604287  | 1.53E-07 | 6.80E-06 |
| 1.712607699 | 0.776194716  | 1.55E-07 | 6.84E-06 |
| 0.538942696 | -0.89179621  | 1.61E-07 | 7.11E-06 |
| 2.59502452  | 1.37574817   | 1.62E-07 | 7.11E-06 |
| 1.945725505 | 0.960308195  | 1.63E-07 | 7.14E-06 |
| 2.708852434 | 1.437681804  | 1.68E-07 | 7.33E-06 |
| 0.574968357 | -0.798445535 | 1.71E-07 | 7.44E-06 |
| 1.771974886 | 0.825358157  | 1.73E-07 | 7.51E-06 |
| 1.656839753 | 0.728434074  | 1.74E-07 | 7.53E-06 |
| 1.919028502 | 0.940376139  | 1.78E-07 | 7.67E-06 |
| 1.776184851 | 0.828781733  | 1.81E-07 | 7.78E-06 |
| 1.708199819 | 0.772476746  | 1.86E-07 | 7.97E-06 |
| 1.657234544 | 0.728777797  | 1.88E-07 | 8.06E-06 |
| 0.344681595 | -1.536663829 | 1.92E-07 | 8.18E-06 |
| 1.831108934 | 0.872717621  | 2.04E-07 | 8.66E-06 |
| 1.831521808 | 0.873042879  | 2.04E-07 | 8.66E-06 |
| 1.641758588 | 0.715242002  | 2.05E-07 | 8.66E-06 |
| 0.372646239 | -1.424121396 | 2.08E-07 | 8.77E-06 |
| 1.698985414 | 0.764673466  | 2.18E-07 | 9.16E-06 |
| 0.5977871   | -0.742296331 | 2.19E-07 | 9.17E-06 |
| 1.721646363 | 0.783788835  | 2.31E-07 | 9.63E-06 |
| 1.680605822 | 0.748981387  | 2.40E-07 | 9.98E-06 |
| 1.67035423  | 0.740154086  | 2.74E-07 | 1.14E-05 |
| 1.713958039 | 0.77733179   | 2.75E-07 | 1.14E-05 |
| 0.569501972 | -0.812227257 | 2.78E-07 | 1.15E-05 |
| 0.579298229 | -0.78762184  | 2.85E-07 | 1.17E-05 |
| 1.669429372 | 0.739355059  | 2.91E-07 | 1.19E-05 |
| 0.442656473 | -1.175740576 | 2.93E-07 | 1.20E-05 |
| 1.771907642 | 0.825303408  | 3.07E-07 | 1.25E-05 |
| 0.608709489 | -0.71617424  | 3.11E-07 | 1.27E-05 |
| 1.75041559  | 0.807697493  | 3.15E-07 | 1.28E-05 |
| 0.535949625 | -0.899830691 | 3.18E-07 | 1.29E-05 |
| 1.880285305 | 0.910951586  | 3.59E-07 | 1.45E-05 |
| 1.795918528 | 0.844721903  | 3.61E-07 | 1.45E-05 |
| 1.6962309   | 0.762332571  | 3.64E-07 | 1.46E-05 |
| 2.701466665 | 1.43374288   | 3.67E-07 | 1.46E-05 |
| 0.617545219 | -0.695383315 | 3.66E-07 | 1.46E-05 |
| 0.528992767 | -0.918680099 | 3.70E-07 | 1.47E-05 |
| 3.240202495 | 1.696083977  | 3.79E-07 | 1.51E-05 |
| 0.491808628 | -1.023831049 | 3.83E-07 | 1.51E-05 |

|             |              |          |          |
|-------------|--------------|----------|----------|
| 0.563004385 | -0.828781935 | 3.85E-07 | 1.52E-05 |
| 0.710117099 | -0.493871148 | 3.96E-07 | 1.56E-05 |
| 0.597122548 | -0.743901048 | 4.09E-07 | 1.60E-05 |
| 0.554622479 | -0.850422005 | 4.13E-07 | 1.62E-05 |
| 1.679040549 | 0.747637072  | 4.22E-07 | 1.65E-05 |
| 0.502072211 | -0.99403322  | 4.30E-07 | 1.67E-05 |
| 0.598193262 | -0.741316435 | 4.32E-07 | 1.68E-05 |
| 0.664516169 | -0.589623791 | 4.53E-07 | 1.75E-05 |
| 1.655181647 | 0.726989554  | 4.59E-07 | 1.77E-05 |
| 0.59414081  | -0.751123209 | 4.65E-07 | 1.78E-05 |
| 1.673068906 | 0.742496865  | 4.64E-07 | 1.78E-05 |
| 0.49778222  | -1.006413396 | 4.66E-07 | 1.78E-05 |
| 1.694329654 | 0.760714597  | 4.85E-07 | 1.85E-05 |
| 0.661773537 | -0.595590494 | 5.06E-07 | 1.92E-05 |
| 0.62388728  | -0.6806427   | 5.13E-07 | 1.94E-05 |
| 1.699332386 | 0.764968068  | 5.12E-07 | 1.94E-05 |
| 1.622056736 | 0.697824283  | 5.33E-07 | 2.01E-05 |
| 1.757695285 | 0.813684986  | 5.40E-07 | 2.03E-05 |
| 1.670766782 | 0.740510366  | 5.48E-07 | 2.06E-05 |
| 1.715182335 | 0.778361952  | 5.67E-07 | 2.12E-05 |
| 1.907438747 | 0.931636729  | 5.83E-07 | 2.18E-05 |
| 0.597414089 | -0.743196833 | 5.97E-07 | 2.22E-05 |
| 0.556125577 | -0.846517405 | 5.98E-07 | 2.22E-05 |
| 0.590081179 | -0.761014651 | 6.18E-07 | 2.29E-05 |
| 0.601215847 | -0.734045058 | 6.30E-07 | 2.33E-05 |
| 1.584885008 | 0.664378169  | 6.40E-07 | 2.35E-05 |
| 0.607152506 | -0.719869152 | 6.42E-07 | 2.35E-05 |
| 1.661626199 | 0.732595869  | 6.43E-07 | 2.35E-05 |
| 0.521996902 | -0.937886852 | 6.43E-07 | 2.35E-05 |
| 0.61931887  | -0.69124569  | 6.64E-07 | 2.42E-05 |
| 1.661524286 | 0.732507381  | 6.82E-07 | 2.48E-05 |
| 0.614107776 | -0.703436223 | 7.05E-07 | 2.56E-05 |
| 0.697548823 | -0.519633897 | 7.11E-07 | 2.57E-05 |
| 0.553907965 | -0.852281811 | 7.23E-07 | 2.61E-05 |
| 0.526573434 | -0.925293356 | 7.82E-07 | 2.82E-05 |
| 0.582919591 | -0.778631207 | 7.85E-07 | 2.82E-05 |
| 0.584464159 | -0.774813539 | 8.59E-07 | 3.08E-05 |
| 0.574834806 | -0.798780675 | 8.84E-07 | 3.16E-05 |
| 0.531632201 | -0.911499603 | 8.98E-07 | 3.20E-05 |
| 1.853489612 | 0.890244029  | 9.16E-07 | 3.26E-05 |
| 1.642012962 | 0.715465516  | 9.30E-07 | 3.30E-05 |
| 0.616943908 | -0.696788767 | 9.46E-07 | 3.35E-05 |
| 1.631054728 | 0.70580519   | 9.68E-07 | 3.42E-05 |
| 0.613224383 | -0.705513033 | 9.89E-07 | 3.48E-05 |
| 1.706444595 | 0.770993574  | 1.00E-06 | 3.52E-05 |
| 1.635267553 | 0.7095267    | 1.01E-06 | 3.53E-05 |
| 1.797248718 | 0.845790075  | 1.06E-06 | 3.71E-05 |
| 0.587999842 | -0.766112326 | 1.08E-06 | 3.77E-05 |
| 1.612565208 | 0.689357501  | 1.08E-06 | 3.77E-05 |
| 1.612907321 | 0.689663542  | 1.10E-06 | 3.82E-05 |
| 0.61608221  | -0.698805217 | 1.11E-06 | 3.82E-05 |

|             |              |          |          |
|-------------|--------------|----------|----------|
| 0.581203755 | -0.782884071 | 1.12E-06 | 3.88E-05 |
| 0.628451048 | -0.670127721 | 1.16E-06 | 3.99E-05 |
| 0.639646031 | -0.64465433  | 1.18E-06 | 4.05E-05 |
| 0.611403457 | -0.709803386 | 1.19E-06 | 4.07E-05 |
| 0.61301817  | -0.705998259 | 1.22E-06 | 4.15E-05 |
| 1.948959152 | 0.962703853  | 1.22E-06 | 4.16E-05 |
| 0.511408634 | -0.967451577 | 1.28E-06 | 4.35E-05 |
| 0.476597196 | -1.069157632 | 1.29E-06 | 4.37E-05 |
| 0.566100524 | -0.820869835 | 1.32E-06 | 4.48E-05 |
| 0.64266128  | -0.63786954  | 1.35E-06 | 4.55E-05 |
| 1.649966561 | 0.722436786  | 1.35E-06 | 4.56E-05 |
| 0.587296146 | -0.767839925 | 1.41E-06 | 4.74E-05 |
| 0.618077633 | -0.694140038 | 1.42E-06 | 4.78E-05 |
| 0.592419497 | -0.755308974 | 1.46E-06 | 4.88E-05 |
| 0.554769315 | -0.850040103 | 1.46E-06 | 4.88E-05 |
| 0.608000685 | -0.717855145 | 1.51E-06 | 5.01E-05 |
| 0.593069809 | -0.753726162 | 1.55E-06 | 5.15E-05 |
| 0.457445939 | -1.128326838 | 1.58E-06 | 5.23E-05 |
| 1.760640933 | 0.816100715  | 1.59E-06 | 5.25E-05 |
| 1.65853694  | 0.729911145  | 1.62E-06 | 5.35E-05 |
| 0.493633941 | -1.018486501 | 1.66E-06 | 5.45E-05 |
| 0.626560181 | -0.674475008 | 1.68E-06 | 5.51E-05 |
| 1.634126608 | 0.708519764  | 1.69E-06 | 5.54E-05 |
| 0.605681221 | -0.723369413 | 1.70E-06 | 5.55E-05 |
| 1.901293625 | 0.926981351  | 1.80E-06 | 5.86E-05 |
| 1.754710451 | 0.811232987  | 1.81E-06 | 5.88E-05 |
| 0.620136549 | -0.689342174 | 1.82E-06 | 5.91E-05 |
| 0.622720512 | -0.683343293 | 1.87E-06 | 6.04E-05 |
| 0.637646872 | -0.649170413 | 1.87E-06 | 6.04E-05 |
| 0.444221288 | -1.170649563 | 1.88E-06 | 6.07E-05 |
| 0.589339543 | -0.762829024 | 1.89E-06 | 6.08E-05 |
| 1.661751555 | 0.732704704  | 1.90E-06 | 6.09E-05 |
| 2.038966923 | 1.027838372  | 1.92E-06 | 6.14E-05 |
| 2.171425852 | 1.11864269   | 1.94E-06 | 6.19E-05 |
| 0.474422013 | -1.075757143 | 1.94E-06 | 6.19E-05 |
| 1.735604797 | 0.795438478  | 1.97E-06 | 6.24E-05 |
| 1.682833402 | 0.750892359  | 1.97E-06 | 6.24E-05 |
| 0.503784825 | -0.989120429 | 1.97E-06 | 6.24E-05 |
| 1.627428009 | 0.702593725  | 2.01E-06 | 6.36E-05 |
| 1.6205303   | 0.696465996  | 2.06E-06 | 6.48E-05 |
| 0.569110355 | -0.813219665 | 2.14E-06 | 6.72E-05 |
| 1.719655001 | 0.782119159  | 2.14E-06 | 6.72E-05 |
| 1.684641548 | 0.752441653  | 2.16E-06 | 6.77E-05 |
| 1.719353465 | 0.781866165  | 2.21E-06 | 6.90E-05 |
| 0.462700547 | -1.11184929  | 2.24E-06 | 6.97E-05 |
| 1.619920703 | 0.695923193  | 2.25E-06 | 6.99E-05 |
| 0.375880611 | -1.411653596 | 2.34E-06 | 7.27E-05 |
| 2.254198299 | 1.172614433  | 2.43E-06 | 7.51E-05 |
| 0.469836747 | -1.08976854  | 2.47E-06 | 7.62E-05 |
| 0.56718759  | -0.818102127 | 2.55E-06 | 7.85E-05 |
| 0.595796526 | -0.747108384 | 2.55E-06 | 7.85E-05 |

|             |              |          |             |
|-------------|--------------|----------|-------------|
| 0.6573369   | -0.605295122 | 2.72E-06 | 8.33E-05    |
| 1.896659357 | 0.923460592  | 2.73E-06 | 8.35E-05    |
| 1.674976166 | 0.744140567  | 2.76E-06 | 8.44E-05    |
| 1.59754839  | 0.675859631  | 2.79E-06 | 8.51E-05    |
| 0.58547237  | -0.772327007 | 2.83E-06 | 8.61E-05    |
| 1.641105923 | 0.714668358  | 2.90E-06 | 8.81E-05    |
| 2.124354552 | 1.08702457   | 2.95E-06 | 8.95E-05    |
| 0.621368839 | -0.6864782   | 2.99E-06 | 9.03E-05    |
| 0.392481568 | -1.349303192 | 3.00E-06 | 9.04E-05    |
| 0.611815709 | -0.708830946 | 3.09E-06 | 9.29E-05    |
| 1.71724459  | 0.780095539  | 3.12E-06 | 9.35E-05    |
| 1.574397184 | 0.654799545  | 3.12E-06 | 9.35E-05    |
| 0.587472263 | -0.767407357 | 3.14E-06 | 9.40E-05    |
| 0.55173165  | -0.857961352 | 3.20E-06 | 9.53E-05    |
| 0.48784762  | -1.035497505 | 3.45E-06 | 0.000102375 |
| 1.568160395 | 0.649073129  | 3.44E-06 | 0.000102375 |
| 1.596801455 | 0.67518494   | 3.52E-06 | 0.000104133 |
| 0.628951747 | -0.668978756 | 3.52E-06 | 0.000104133 |
| 1.619739153 | 0.695761497  | 3.54E-06 | 0.000104496 |
| 0.296225556 | -1.755231983 | 3.64E-06 | 0.000107284 |
| 1.640426838 | 0.714071252  | 3.77E-06 | 0.000110804 |
| 0.393720996 | -1.344754444 | 3.80E-06 | 0.000111347 |
| 1.595892207 | 0.674363209  | 3.93E-06 | 0.00011492  |
| 0.607344529 | -0.719412947 | 4.49E-06 | 0.000131284 |
| 0.650055225 | -0.621365807 | 4.64E-06 | 0.000135168 |
| 0.475551419 | -1.072326753 | 4.81E-06 | 0.000139948 |
| 1.809284586 | 0.85541935   | 4.83E-06 | 0.000140163 |
| 0.620404785 | -0.688718282 | 4.92E-06 | 0.000142362 |
| 0.323612118 | -1.627662464 | 4.92E-06 | 0.000142362 |
| 1.700727752 | 0.766152216  | 4.98E-06 | 0.000143611 |
| 0.61893258  | -0.692145829 | 5.09E-06 | 0.000146608 |
| 0.636488471 | -0.651793713 | 5.21E-06 | 0.000149777 |
| 1.59982933  | 0.677918006  | 5.24E-06 | 0.000150176 |
| 0.675852831 | -0.565218965 | 5.25E-06 | 0.000150186 |
| 0.497560201 | -1.007057004 | 5.33E-06 | 0.000152132 |
| 1.651170351 | 0.72348897   | 5.45E-06 | 0.000155204 |
| 0.604292995 | -0.726679877 | 5.52E-06 | 0.000156937 |
| 1.647829605 | 0.720567067  | 5.57E-06 | 0.000158122 |
| 0.631463043 | -0.663229794 | 5.65E-06 | 0.000160079 |
| 1.562955477 | 0.644276682  | 5.68E-06 | 0.000160655 |
| 1.578751763 | 0.658784345  | 5.70E-06 | 0.000160898 |
| 1.667730536 | 0.737886204  | 5.87E-06 | 0.000165425 |
| 2.574729092 | 1.364420643  | 5.97E-06 | 0.000167788 |
| 1.631417066 | 0.706125649  | 6.06E-06 | 0.00016982  |
| 0.568757483 | -0.814114474 | 6.07E-06 | 0.00016982  |
| 1.574588075 | 0.654974458  | 6.12E-06 | 0.000170966 |
| 1.644042167 | 0.717247302  | 6.19E-06 | 0.000172226 |
| 2.362209846 | 1.240137131  | 6.19E-06 | 0.000172226 |
| 1.591370735 | 0.670269973  | 6.27E-06 | 0.000174006 |
| 1.775208815 | 0.827988736  | 6.29E-06 | 0.000174414 |
| 1.562234066 | 0.643610626  | 6.44E-06 | 0.000178203 |



|             |              |          |             |
|-------------|--------------|----------|-------------|
| 1.636413927 | 0.710537721  | 6.65E-06 | 0.00018348  |
| 0.634017558 | -0.657405302 | 6.66E-06 | 0.000183531 |
| 1.952409351 | 0.965255566  | 6.69E-06 | 0.000183868 |
| 4.012523835 | 2.004509962  | 6.74E-06 | 0.000184926 |
| 0.615158473 | -0.700969978 | 6.80E-06 | 0.000186175 |
| 1.878456235 | 0.909547504  | 6.94E-06 | 0.000189823 |
| 0.628024951 | -0.671106218 | 7.01E-06 | 0.000191265 |
| 1.638352058 | 0.712245404  | 7.38E-06 | 0.000200126 |
| 0.6441599   | -0.634509241 | 7.35E-06 | 0.000200126 |
| 3.888213255 | 1.959107348  | 7.36E-06 | 0.000200126 |
| 1.536892856 | 0.620016591  | 7.52E-06 | 0.000203627 |
| 0.662649161 | -0.593682857 | 7.58E-06 | 0.00020473  |
| 1.567302506 | 0.648283662  | 7.77E-06 | 0.000208796 |
| 0.51262895  | -0.96401314  | 7.76E-06 | 0.000208796 |
| 1.642116127 | 0.715556155  | 7.77E-06 | 0.000208796 |
| 0.624632987 | -0.678919334 | 7.80E-06 | 0.000209302 |
| 0.638149424 | -0.648033821 | 7.94E-06 | 0.000212572 |
| 0.530274844 | -0.915187787 | 8.00E-06 | 0.000212964 |
| 0.576510239 | -0.794581863 | 8.00E-06 | 0.000212964 |
| 2.081560796 | 1.057665696  | 8.02E-06 | 0.000212964 |
| 1.577044028 | 0.657222937  | 8.00E-06 | 0.000212964 |
| 0.584266029 | -0.775302686 | 8.25E-06 | 0.000218654 |
| 0.64805597  | -0.625809677 | 8.34E-06 | 0.000220658 |
| 1.572336779 | 0.652910262  | 8.43E-06 | 0.000222652 |
| 1.896860459 | 0.923613552  | 8.47E-06 | 0.000223266 |
| 0.636194332 | -0.652460577 | 8.51E-06 | 0.000224054 |
| 0.627047552 | -0.673353241 | 8.65E-06 | 0.000227239 |
| 0.630225995 | -0.666058832 | 8.68E-06 | 0.000227546 |
| 0.649784772 | -0.621966161 | 8.71E-06 | 0.000227978 |
| 1.646279987 | 0.71920972   | 8.97E-06 | 0.000234288 |
| 1.578549331 | 0.658599347  | 9.00E-06 | 0.000234766 |
| 0.494297727 | -1.016547823 | 9.18E-06 | 0.000238961 |
| 0.55149769  | -0.858573252 | 9.46E-06 | 0.000245869 |
| 1.572655838 | 0.653202984  | 9.86E-06 | 0.000255778 |
| 0.629268313 | -0.668252797 | 1.03E-05 | 0.000266374 |
| 1.614509402 | 0.691095842  | 1.04E-05 | 0.000268936 |
| 1.689676942 | 0.756747437  | 1.05E-05 | 0.000269645 |
| 1.580688427 | 0.660553023  | 1.05E-05 | 0.000270884 |
| 1.521386655 | 0.605386855  | 1.09E-05 | 0.000279002 |
| 1.663928333 | 0.734593296  | 1.10E-05 | 0.000283319 |
| 0.633787532 | -0.657928815 | 1.12E-05 | 0.000284709 |
| 1.58424472  | 0.663795207  | 1.12E-05 | 0.000284709 |
| 0.625691074 | -0.676477572 | 1.12E-05 | 0.000284709 |
| 0.419297185 | -1.25395495  | 1.12E-05 | 0.000284709 |
| 1.655912756 | 0.727626665  | 1.13E-05 | 0.000286985 |
| 1.533141925 | 0.616491255  | 1.13E-05 | 0.000286985 |
| 1.545068431 | 0.627670737  | 1.14E-05 | 0.000287992 |
| 0.624945133 | -0.678198561 | 1.14E-05 | 0.000288183 |
| 1.55429135  | 0.63625696   | 1.14E-05 | 0.000288183 |
| 0.475478513 | -1.072547948 | 1.14E-05 | 0.00028831  |
| 0.604772511 | -0.725535529 | 1.18E-05 | 0.00029604  |

|             |              |          |             |
|-------------|--------------|----------|-------------|
| 1.640367118 | 0.71401873   | 1.19E-05 | 0.000297426 |
| 0.637092532 | -0.650425169 | 1.20E-05 | 0.000300404 |
| 1.527177607 | 0.610867853  | 1.23E-05 | 0.000307757 |
| 0.657563124 | -0.6047987   | 1.25E-05 | 0.000312515 |
| 1.520983961 | 0.605004939  | 1.27E-05 | 0.000317127 |
| 1.540311417 | 0.623222062  | 1.27E-05 | 0.000317127 |
| 1.530481359 | 0.613985473  | 1.30E-05 | 0.000323569 |
| 0.657149509 | -0.605706458 | 1.33E-05 | 0.000328555 |
| 1.568953503 | 0.649802598  | 1.33E-05 | 0.000329746 |
| 0.674642867 | -0.567804105 | 1.34E-05 | 0.000330883 |
| 0.263283389 | -1.925311592 | 1.36E-05 | 0.000335624 |
| 0.551138292 | -0.859513729 | 1.39E-05 | 0.000342676 |
| 1.585853845 | 0.665259816  | 1.39E-05 | 0.000342676 |
| 0.496739582 | -1.009438385 | 1.41E-05 | 0.000345958 |
| 0.615469112 | -0.700241639 | 1.42E-05 | 0.000347027 |
| 1.597706299 | 0.676002227  | 1.42E-05 | 0.000347143 |
| 1.611624775 | 0.688515889  | 1.42E-05 | 0.000347702 |
| 1.774761453 | 0.827625124  | 1.46E-05 | 0.000356093 |
| 2.536193937 | 1.342665069  | 1.47E-05 | 0.000356339 |
| 0.668004854 | -0.582069508 | 1.47E-05 | 0.000356916 |
| 1.736854559 | 0.796476951  | 1.50E-05 | 0.000363243 |
| 1.579514942 | 0.659481585  | 1.52E-05 | 0.000367777 |
| 0.503858289 | -0.988910064 | 1.54E-05 | 0.000371358 |
| 1.507816589 | 0.59246095   | 1.55E-05 | 0.000373457 |
| 0.642224722 | -0.638849894 | 1.59E-05 | 0.000381638 |
| 0.619479056 | -0.690872588 | 1.59E-05 | 0.000381638 |
| 1.543414491 | 0.626125557  | 1.62E-05 | 0.000389452 |
| 0.637574427 | -0.649334331 | 1.69E-05 | 0.000405859 |
| 0.487246221 | -1.037277099 | 1.73E-05 | 0.000412758 |
| 1.644765201 | 0.717881646  | 1.73E-05 | 0.000413053 |
| 1.514691266 | 0.599023764  | 1.74E-05 | 0.000414118 |
| 1.55492441  | 0.636844448  | 1.75E-05 | 0.000417041 |
| 1.52314283  | 0.607051234  | 1.81E-05 | 0.000429181 |
| 1.538901231 | 0.62190064   | 1.87E-05 | 0.00044296  |
| 0.641597639 | -0.640259262 | 1.89E-05 | 0.000446556 |
| 1.585559864 | 0.664992348  | 1.89E-05 | 0.000446746 |
| 1.598830802 | 0.677017272  | 1.91E-05 | 0.000449489 |
| 1.964878711 | 0.97444026   | 1.91E-05 | 0.000449489 |
| 0.542044604 | -0.883516521 | 1.93E-05 | 0.000452817 |
| 0.660077141 | -0.599293458 | 1.93E-05 | 0.000453559 |
| 0.657473738 | -0.604994826 | 2.01E-05 | 0.000471335 |
| 1.586983645 | 0.66628726   | 2.05E-05 | 0.000478774 |
| 0.670863165 | -0.575909562 | 2.07E-05 | 0.00048431  |
| 1.875988357 | 0.907650874  | 2.11E-05 | 0.000491019 |
| 1.582066539 | 0.661810279  | 2.13E-05 | 0.000495193 |
| 0.669017492 | -0.579884164 | 2.14E-05 | 0.000497552 |
| 0.494860394 | -1.014906514 | 2.15E-05 | 0.000498905 |
| 1.532934611 | 0.616296158  | 2.16E-05 | 0.000499252 |
| 1.660020304 | 0.731200888  | 2.20E-05 | 0.000509793 |
| 1.878830433 | 0.909834867  | 2.21E-05 | 0.000510543 |
| 1.55375939  | 0.63576311   | 2.23E-05 | 0.000513497 |

|             |              |          |             |
|-------------|--------------|----------|-------------|
| 0.616576857 | -0.697647355 | 2.24E-05 | 0.000515836 |
| 1.535994982 | 0.619173503  | 2.25E-05 | 0.000516772 |
| 0.697413161 | -0.519914506 | 2.25E-05 | 0.000516848 |
| 0.65572078  | -0.60884648  | 2.32E-05 | 0.000530016 |
| 1.526600222 | 0.610322306  | 2.33E-05 | 0.000533459 |
| 0.629202616 | -0.668403425 | 2.39E-05 | 0.000544617 |
| 1.630247984 | 0.705091436  | 2.42E-05 | 0.000550342 |
| 0.601358162 | -0.733703596 | 2.48E-05 | 0.000565133 |
| 2.039778355 | 1.028412396  | 2.49E-05 | 0.000565152 |
| 0.571743601 | -0.806559781 | 2.51E-05 | 0.000568426 |
| 0.519085844 | -0.945954949 | 2.55E-05 | 0.0005764   |
| 0.043989482 | -4.506697567 | 2.56E-05 | 0.000578695 |
| 0.646011779 | -0.630367624 | 2.60E-05 | 0.000586023 |
| 1.634188581 | 0.708574477  | 2.61E-05 | 0.000587103 |
| 1.520121557 | 0.604186694  | 2.62E-05 | 0.000588916 |
| 0.639059092 | -0.645978755 | 2.64E-05 | 0.000592216 |
| 0.665155606 | -0.588236212 | 2.68E-05 | 0.000600859 |
| 0.659776435 | -0.599950845 | 2.69E-05 | 0.000602268 |
| 0.391248514 | -1.353842821 | 2.71E-05 | 0.000605262 |
| 0.596219061 | -0.746085597 | 2.71E-05 | 0.000605262 |
| 0.640725166 | -0.642222438 | 2.73E-05 | 0.000607465 |
| 0.508932863 | -0.974452742 | 2.75E-05 | 0.000611266 |
| 0.653531659 | -0.613670969 | 2.75E-05 | 0.000611266 |
| 1.54621885  | 0.628744531  | 2.78E-05 | 0.000615615 |
| 1.696784353 | 0.762803222  | 2.89E-05 | 0.000639771 |
| 0.606988882 | -0.720258002 | 2.91E-05 | 0.000643162 |
| 0.695968689 | -0.522905694 | 2.93E-05 | 0.000645654 |
| 0.63403568  | -0.657364065 | 2.98E-05 | 0.000655487 |
| 0.547691017 | -0.868565878 | 2.98E-05 | 0.000655487 |
| 0.558683283 | -0.839897441 | 3.03E-05 | 0.000666015 |
| 0.675154306 | -0.566710829 | 3.06E-05 | 0.000669303 |
| 0.654000057 | -0.612637334 | 3.05E-05 | 0.000669303 |
| 1.709991308 | 0.773988992  | 3.19E-05 | 0.000697143 |
| 0.536740977 | -0.897702061 | 3.19E-05 | 0.000697374 |
| 1.618130755 | 0.694328191  | 3.25E-05 | 0.000708902 |
| 0.65934489  | -0.600894787 | 3.27E-05 | 0.000711668 |
| 0.64735374  | -0.627373821 | 3.32E-05 | 0.00072073  |
| 0.606871477 | -0.720537079 | 3.32E-05 | 0.000721084 |
| 0.675585866 | -0.56578895  | 3.35E-05 | 0.000725176 |
| 1.63750306  | 0.711497603  | 3.35E-05 | 0.000725176 |
| 0.647070082 | -0.62800612  | 3.44E-05 | 0.000743122 |
| 1.862779312 | 0.897456765  | 3.45E-05 | 0.000743216 |
| 0.629233166 | -0.66833338  | 3.46E-05 | 0.000744598 |
| 0.658155081 | -0.603500529 | 3.50E-05 | 0.000752904 |
| 0.525485154 | -0.928278089 | 3.56E-05 | 0.000764146 |
| 1.594069241 | 0.672714297  | 3.61E-05 | 0.000772664 |
| 1.460549968 | 0.546511716  | 3.64E-05 | 0.000776066 |
| 0.680574719 | -0.555174535 | 3.63E-05 | 0.000776066 |
| 0.582010734 | -0.780882335 | 3.64E-05 | 0.000776066 |
| 1.495063402 | 0.580206666  | 3.65E-05 | 0.000778018 |
| 1.524964277 | 0.608775447  | 3.66E-05 | 0.000778577 |

|             |              |          |             |
|-------------|--------------|----------|-------------|
| 0.664913421 | -0.588761598 | 3.67E-05 | 0.000778757 |
| 0.600706907 | -0.735266844 | 3.68E-05 | 0.000780319 |
| 1.501155671 | 0.586073593  | 3.73E-05 | 0.000788784 |
| 1.510177326 | 0.594717962  | 3.76E-05 | 0.000795751 |
| 5.321119568 | 2.411729822  | 3.78E-05 | 0.000797969 |
| 0.661440049 | -0.596317694 | 3.82E-05 | 0.000804669 |
| 0.554460094 | -0.850844465 | 3.85E-05 | 0.000809876 |
| 0.695007711 | -0.52489911  | 3.86E-05 | 0.000810178 |
| 1.609817207 | 0.686896881  | 3.87E-05 | 0.00081189  |
| 1.542793843 | 0.625545294  | 3.89E-05 | 0.00081465  |
| 0.586855167 | -0.768923597 | 3.90E-05 | 0.000815168 |
| 0.659602889 | -0.600330378 | 4.03E-05 | 0.000841145 |
| 1.518928324 | 0.603053792  | 4.07E-05 | 0.000848463 |
| 1.507099513 | 0.591774681  | 4.07E-05 | 0.000848524 |
| 1.616037217 | 0.692460424  | 4.10E-05 | 0.000853471 |
| 1.609404897 | 0.686527328  | 4.22E-05 | 0.000876295 |
| 0.681670925 | -0.552852646 | 4.23E-05 | 0.000877225 |
| 1.750693978 | 0.807926922  | 4.25E-05 | 0.000879754 |
| 1.698210678 | 0.764015449  | 4.29E-05 | 0.000886592 |
| 1.607779155 | 0.685069251  | 4.29E-05 | 0.000886592 |
| 1.449632003 | 0.535686711  | 4.30E-05 | 0.000887027 |
| 1.533916169 | 0.61721964   | 4.40E-05 | 0.000905367 |
| 1.494239071 | 0.579410991  | 4.43E-05 | 0.000910521 |
| 0.679896035 | -0.556613938 | 4.48E-05 | 0.000919003 |
| 0.61020368  | -0.712637214 | 4.50E-05 | 0.000923041 |
| 1.494164148 | 0.579338651  | 4.55E-05 | 0.000932139 |
| 0.60248842  | -0.730994582 | 4.64E-05 | 0.000948542 |
| 0.582875966 | -0.778739179 | 4.65E-05 | 0.00094973  |
| 0.541241902 | -0.885654561 | 4.69E-05 | 0.000955844 |
| 1.479048462 | 0.564669324  | 4.77E-05 | 0.000969889 |
| 0.630962347 | -0.66437418  | 4.82E-05 | 0.000978536 |
| 1.537953304 | 0.6210117    | 4.94E-05 | 0.001001993 |
| 1.51337806  | 0.597772435  | 5.07E-05 | 0.001027804 |
| 1.538607224 | 0.621624988  | 5.19E-05 | 0.001050318 |
| 0.665843561 | -0.586744838 | 5.24E-05 | 0.001058948 |
| 1.515953106 | 0.600225126  | 5.26E-05 | 0.001060861 |
| 0.664228054 | -0.590249438 | 5.27E-05 | 0.001060861 |
| 1.467357563 | 0.553220467  | 5.30E-05 | 0.001065705 |
| 1.57346019  | 0.653940677  | 5.31E-05 | 0.001065705 |
| 0.487444584 | -1.036689883 | 5.32E-05 | 0.001066736 |
| 1.556127679 | 0.637960437  | 5.47E-05 | 0.001094736 |
| 1.491408969 | 0.576675923  | 5.52E-05 | 0.001103735 |
| 0.669920646 | -0.577937881 | 5.74E-05 | 0.001144747 |
| 1.47992744  | 0.565526443  | 5.74E-05 | 0.001144747 |
| 1.483531323 | 0.569035388  | 5.75E-05 | 0.001144862 |
| 1.578277106 | 0.658350529  | 5.78E-05 | 0.001148827 |
| 1.721500597 | 0.783666681  | 5.80E-05 | 0.001150435 |
| 2.132602273 | 1.09261493   | 5.81E-05 | 0.001150435 |
| 0.691643134 | -0.531900251 | 5.81E-05 | 0.001150435 |
| 1.567850222 | 0.648787744  | 5.82E-05 | 0.001150513 |
| 1.598001449 | 0.676268716  | 5.91E-05 | 0.001168046 |

|             |              |             |             |
|-------------|--------------|-------------|-------------|
| 1.488693959 | 0.5740472    | 5.95E-05    | 0.00117151  |
| 1.644088043 | 0.717287559  | 5.94E-05    | 0.00117151  |
| 1.494225962 | 0.579398334  | 6.04E-05    | 0.001187811 |
| 1.552291912 | 0.634399885  | 6.16E-05    | 0.001209671 |
| 1.549582889 | 0.631879928  | 6.27E-05    | 0.00122715  |
| 0.593842496 | -0.751847757 | 6.26E-05    | 0.00122715  |
| 1.61850132  | 0.694658542  | 6.29E-05    | 0.001229155 |
| 0.266280051 | -1.908983747 | 6.50E-05    | 0.001268552 |
| 1.595347852 | 0.673871026  | 6.53E-05    | 0.001273198 |
| 1.48094965  | 0.566522592  | 6.54E-05    | 0.001273233 |
| 0.676511117 | -0.563814453 | 6.85E-05    | 0.001332603 |
| 1.674265554 | 0.743528371  | 6.87E-05    | 0.001334516 |
| 0.640128957 | -0.643565523 | 7.01E-05    | 0.001360081 |
| 0.685705435 | -0.544339138 | 7.02E-05    | 0.001360207 |
| 1.491242309 | 0.576514697  | 7.04E-05    | 0.001361714 |
| 0.647112658 | -0.627911197 | 7.14E-05    | 0.001378543 |
| 1.481145662 | 0.566713528  | 7.19E-05    | 0.001386291 |
| 1.514015214 | 0.598379703  | 7.38E-05    | 0.001421301 |
| 1.540411346 | 0.623315654  | 7.49E-05    | 0.001439982 |
| 0.65699163  | -0.606053104 | 7.66E-05    | 0.001471714 |
| 0.632739849 | -0.660315637 | 7.75E-05    | 0.001486747 |
| 1.632982437 | 0.707509275  | 7.79E-05    | 0.001492582 |
| 1.495107853 | 0.580249561  | 7.99E-05    | 0.00152797  |
| 0.318045648 | -1.652694248 | 8.00E-05    | 0.001528015 |
| 1.568558029 | 0.649438902  | 8.01E-05    | 0.001528687 |
| 0.657368518 | -0.605225729 | 8.07E-05    | 0.001536705 |
| 2.37001802  | 1.244898029  | 8.22E-05    | 0.00156377  |
| 0.690018227 | -0.535293622 | 8.24E-05    | 0.001563933 |
| 1.511840319 | 0.59630577   | 8.23E-05    | 0.001563933 |
| 1.781405966 | 0.833016331  | 8.31E-05    | 0.001574908 |
| 0.577801539 | -0.791354048 | 8.42E-05    | 0.001593733 |
| 0.681496725 | -0.55322137  | 8.73E-05    | 0.001649741 |
| 0.610826046 | -0.711166513 | 8.88E-05    | 0.001675081 |
| 0.55132267  | -0.85903117  | 8.93E-05    | 0.001683138 |
| 0.645316272 | -0.631921691 | 8.95E-05    | 0.001684521 |
| 0.65145871  | -0.618254352 | 9.05E-05    | 0.001701673 |
| 0.672179343 | -0.573081887 | 9.07E-05    | 0.00170352  |
| 0.663826967 | -0.591120857 | 9.40E-05    | 0.001762646 |
| 0.712471484 | -0.489095822 | 9.54E-05    | 0.001785555 |
| 0.680376975 | -0.555593776 | 9.58E-05    | 0.001790946 |
| 1.533224551 | 0.616569005  | 9.62E-05    | 0.001793663 |
| 0.701662433 | -0.511150972 | 9.61E-05    | 0.001793663 |
| 1.579482084 | 0.659451572  | 9.82E-05    | 0.001829219 |
| 1.53071611  | 0.614206742  | 9.86E-05    | 0.001833172 |
| 0.409310727 | -1.288731617 | 9.88E-05    | 0.001833172 |
| 2.690331098 | 1.427783736  | 9.88E-05    | 0.001833172 |
| 0.525828696 | -0.927335219 | 9.92E-05    | 0.001834573 |
| 0.686306398 | -0.543075292 | 9.91E-05    | 0.001834573 |
| 0.474889727 | -1.074335548 | 9.93E-05    | 0.001834573 |
| 0.653800938 | -0.613076649 | 9.99E-05    | 0.001842589 |
| 0.65100321  | -0.619263437 | 0.000100528 | 0.001852659 |

|             |              |             |             |
|-------------|--------------|-------------|-------------|
| 0.661851025 | -0.595421575 | 0.000102603 | 0.001888436 |
| 1.496201507 | 0.581304489  | 0.000103135 | 0.001895736 |
| 0.567230211 | -0.817993721 | 0.000103275 | 0.001895848 |
| 0.321726197 | -1.63609468  | 0.000104282 | 0.001911833 |
| 1.738292866 | 0.797671166  | 0.000104651 | 0.001916104 |
| 1.526624372 | 0.610345128  | 0.000105146 | 0.001922664 |
| 0.72019556  | -0.47353939  | 0.00010672  | 0.001948916 |
| 0.6093792   | -0.714587838 | 0.000110352 | 0.002012639 |
| 1.469682499 | 0.555504518  | 0.000113565 | 0.002068561 |
| 1.574767079 | 0.655138458  | 0.000113933 | 0.002072581 |
| 1.586839491 | 0.666156207  | 0.000114447 | 0.002079241 |
| 1.499736743 | 0.584709279  | 0.000114832 | 0.002083551 |
| 1.551548236 | 0.63370855   | 0.000118458 | 0.002146576 |
| 0.65461255  | -0.611286833 | 0.000118973 | 0.002150369 |
| 0.660850688 | -0.597603747 | 0.000118939 | 0.002150369 |
| 1.493202297 | 0.578409633  | 0.000119176 | 0.002151273 |
| 0.661848155 | -0.595427832 | 0.000120373 | 0.002170112 |
| 0.700315683 | -0.513922698 | 0.000121583 | 0.002189108 |
| 0.644654828 | -0.633401201 | 0.00012263  | 0.002205151 |
| 0.639860592 | -0.644170478 | 0.000123169 | 0.002212006 |
| 1.597050908 | 0.675410301  | 0.000124196 | 0.002227609 |
| 1.465794915 | 0.551683265  | 0.000124789 | 0.002235401 |
| 1.482327801 | 0.567864519  | 0.000125549 | 0.002246156 |
| 1.477451168 | 0.563110448  | 0.000126182 | 0.002254629 |
| 0.718177127 | -0.477588388 | 0.000129161 | 0.002304923 |
| 1.459939754 | 0.545908836  | 0.000131794 | 0.002345962 |
| 1.773044563 | 0.826228797  | 0.000131783 | 0.002345962 |
| 1.48854425  | 0.57390211   | 0.000132971 | 0.002363924 |
| 0.639416168 | -0.645172871 | 0.000133744 | 0.002371684 |
| 0.4793022   | -1.060992533 | 0.000133744 | 0.002371684 |
| 1.561848771 | 0.643254769  | 0.000134645 | 0.002384664 |
| 6.026797265 | 2.591391535  | 0.000136    | 0.002405633 |
| 1.549090608 | 0.631421531  | 0.000136183 | 0.002405849 |
| 0.656439107 | -0.607266906 | 0.000138546 | 0.002444526 |
| 1.758790393 | 0.814583557  | 0.000138817 | 0.00244624  |
| 0.495053444 | -1.014343815 | 0.000139118 | 0.002448481 |
| 0.425815961 | -1.231698065 | 0.000139584 | 0.002453616 |
| 0.733500845 | -0.447129467 | 0.000140464 | 0.002464314 |
| 1.5451383   | 0.627735974  | 0.000140543 | 0.002464314 |
| 0.660231787 | -0.598955496 | 0.00014107  | 0.002470486 |
| 0.626959054 | -0.67355687  | 0.00014155  | 0.00247581  |
| 1.438829217 | 0.52489536   | 0.000141789 | 0.002476908 |
| 0.583437848 | -0.777349116 | 0.000142138 | 0.002477435 |
| 1.46730842  | 0.553172149  | 0.000142171 | 0.002477435 |
| 0.682734717 | -0.550602981 | 0.000143658 | 0.002500248 |
| 1.465360925 | 0.55125605   | 0.000144457 | 0.002511047 |
| 1.471074108 | 0.556869927  | 0.000144675 | 0.002511743 |
| 0.702804783 | -0.508804085 | 0.000146837 | 0.002546141 |
| 1.550017607 | 0.632284604  | 0.000147163 | 0.002548657 |
| 1.437241671 | 0.523302671  | 0.000147505 | 0.002551435 |
| 1.483233706 | 0.568745935  | 0.000149916 | 0.002586784 |

|             |              |             |             |
|-------------|--------------|-------------|-------------|
| 1.791176277 | 0.840907326  | 0.000149772 | 0.002586784 |
| 0.683178496 | -0.54966553  | 0.000150311 | 0.002590421 |
| 0.68364684  | -0.548676848 | 0.000150816 | 0.002595949 |
| 1.443848977 | 0.529919848  | 0.000151429 | 0.002603329 |
| 1.4816315   | 0.567186676  | 0.000151758 | 0.002605802 |
| 1.759464791 | 0.815136644  | 0.000155266 | 0.002662788 |
| 0.676070844 | -0.564753664 | 0.000157022 | 0.002689618 |
| 2.162641506 | 1.112794534  | 0.000158117 | 0.00270508  |
| 1.49899783  | 0.583998295  | 0.000158774 | 0.002713039 |
| 1.519162751 | 0.603276437  | 0.000161451 | 0.002755431 |
| 1.438297977 | 0.524362594  | 0.000166345 | 0.002835516 |
| 1.477863822 | 0.563513338  | 0.000167185 | 0.002846392 |
| 1.464409732 | 0.550319267  | 0.000169461 | 0.002881653 |
| 0.723602289 | -0.466731123 | 0.000170127 | 0.002889487 |
| 0.690011396 | -0.535307906 | 0.00017193  | 0.002916594 |
| 0.589119215 | -0.763368487 | 0.000173728 | 0.002943548 |
| 1.491693943 | 0.576951562  | 0.000174801 | 0.002958163 |
| 0.716074844 | -0.481817709 | 0.000175923 | 0.002973585 |
| 1.546355013 | 0.628871572  | 0.000177781 | 0.003001387 |
| 1.459256071 | 0.545233071  | 0.000179157 | 0.003021002 |
| 1.4511993   | 0.537245665  | 0.000180822 | 0.003045424 |
| 1.537073031 | 0.620185714  | 0.000183173 | 0.003081332 |
| 1.82701013  | 0.869484633  | 0.000183575 | 0.003084418 |
| 0.656862478 | -0.606336738 | 0.000184354 | 0.003093813 |
| 1.583993431 | 0.663566352  | 0.000187548 | 0.003139925 |
| 1.566587766 | 0.647625597  | 0.000187545 | 0.003139925 |
| 0.710173654 | -0.493756254 | 0.000191278 | 0.003198564 |
| 1.480758045 | 0.566335924  | 0.000191724 | 0.003202225 |
| 1.462747312 | 0.548680567  | 0.000192083 | 0.003204425 |
| 0.667721887 | -0.582680765 | 0.000192455 | 0.003206826 |
| 0.572223111 | -0.805350329 | 0.000193001 | 0.003208327 |
| 1.807711575 | 0.85416451   | 0.000192901 | 0.003208327 |
| 0.720079029 | -0.473772843 | 0.000194677 | 0.003232374 |
| 2.263527125 | 1.178572595  | 0.000196269 | 0.003254961 |
| 1.475362335 | 0.56106931   | 0.000196694 | 0.003258176 |
| 0.685427722 | -0.544923552 | 0.000198541 | 0.003284914 |
| 0.665917291 | -0.586585093 | 0.000201421 | 0.003328645 |
| 0.652262347 | -0.616475747 | 0.000203342 | 0.00335646  |
| 1.502641568 | 0.587500918  | 0.000205327 | 0.003385255 |
| 1.547438602 | 0.629882168  | 0.000205852 | 0.003389937 |
| 1.423767875 | 0.509713954  | 0.00020765  | 0.003415553 |
| 1.630300646 | 0.705138038  | 0.00020872  | 0.003429149 |
| 1.559454477 | 0.641041439  | 0.000210006 | 0.003446254 |
| 0.429277838 | -1.2200164   | 0.000212897 | 0.003489635 |
| 1.597174355 | 0.675521813  | 0.000215593 | 0.003529707 |
| 1.566257111 | 0.64732106   | 0.000217819 | 0.003562009 |
| 0.730927886 | -0.452199019 | 0.000218541 | 0.003569671 |
| 0.638855    | -0.646439572 | 0.000218938 | 0.003572014 |
| 0.678470484 | -0.559642041 | 0.000220144 | 0.00358753  |
| 1.510283922 | 0.594819791  | 0.000221536 | 0.003606038 |
| 1.42709395  | 0.513080315  | 0.000222615 | 0.003619426 |

|             |              |             |             |
|-------------|--------------|-------------|-------------|
| 0.686472378 | -0.542726425 | 0.000223909 | 0.003636265 |
| 1.43727217  | 0.523333285  | 0.000224672 | 0.003644449 |
| 1.438475094 | 0.524540242  | 0.000226285 | 0.003666388 |
| 1.637604692 | 0.711587141  | 0.000228017 | 0.003688409 |
| 1.705918878 | 0.770549043  | 0.000228168 | 0.003688409 |
| 1.489127767 | 0.574467542  | 0.000228607 | 0.003691266 |
| 2.105911857 | 1.074445054  | 0.000233242 | 0.003761794 |
| 0.66722785  | -0.583748586 | 0.000234288 | 0.003774347 |
| 0.686283913 | -0.543122557 | 0.000235059 | 0.003782436 |
| 0.711395026 | -0.491277208 | 0.000236921 | 0.003808051 |
| 0.691220274 | -0.532782562 | 0.000238763 | 0.003833278 |
| 0.708348987 | -0.497467778 | 0.000241291 | 0.003869448 |
| 0.731378326 | -0.451310221 | 0.000242876 | 0.003886014 |
| 1.454663645 | 0.540685604  | 0.00024275  | 0.003886014 |
| 0.593727866 | -0.75212627  | 0.000243393 | 0.003886509 |
| 1.551897337 | 0.634033122  | 0.000243459 | 0.003886509 |
| 1.440685999 | 0.526755931  | 0.000244073 | 0.003891904 |
| 1.535579016 | 0.618782751  | 0.000245329 | 0.003907496 |
| 1.432624314 | 0.518660333  | 0.000246345 | 0.003919259 |
| 2.268335676 | 1.181634151  | 0.000246634 | 0.003919425 |
| 0.645902263 | -0.63061222  | 0.000247883 | 0.003934824 |
| 1.471011859 | 0.556808877  | 0.000249245 | 0.003951998 |
| 1.451137143 | 0.537183871  | 0.000250699 | 0.003970581 |
| 1.55159454  | 0.633751604  | 0.0002514   | 0.003975797 |
| 0.659931511 | -0.599611789 | 0.000251593 | 0.003975797 |
| 0.690376331 | -0.534545092 | 0.000252404 | 0.003984134 |
| 2.186113233 | 1.12836813   | 0.000257402 | 0.004058475 |
| 0.611580284 | -0.709386196 | 0.000259232 | 0.00408276  |
| 1.528983105 | 0.612572465  | 0.000260175 | 0.004093029 |
| 0.627424914 | -0.672485278 | 0.000261759 | 0.004113354 |
| 1.485298588 | 0.570752983  | 0.000264699 | 0.004151852 |
| 1.632232442 | 0.706846522  | 0.000264799 | 0.004151852 |
| 0.69524679  | -0.524402916 | 0.000266649 | 0.004176211 |
| 0.656091934 | -0.608030109 | 0.000267875 | 0.004190755 |
| 1.475404216 | 0.561110263  | 0.00027146  | 0.004242126 |
| 1.512801706 | 0.597222896  | 0.000275585 | 0.004301809 |
| 0.663046694 | -0.592817622 | 0.000281131 | 0.004383527 |
| 0.690208589 | -0.534895667 | 0.000282709 | 0.00440325  |
| 1.450995647 | 0.537043191  | 0.000283883 | 0.004416648 |
| 0.557884199 | -0.841962404 | 0.000285392 | 0.004435236 |
| 0.684629137 | -0.546605401 | 0.000285847 | 0.004436101 |
| 0.712603165 | -0.488829204 | 0.000286078 | 0.004436101 |
| 1.630899577 | 0.705667951  | 0.000286526 | 0.00443816  |
| 1.939689752 | 0.955825916  | 0.000288517 | 0.004464087 |
| 1.523848077 | 0.607719078  | 0.000290423 | 0.004488644 |
| 0.647568202 | -0.626895949 | 0.000291831 | 0.004505459 |
| 0.528811913 | -0.919173418 | 0.00029346  | 0.004525645 |
| 0.695083621 | -0.524741545 | 0.000294044 | 0.004529699 |
| 0.584946075 | -0.773624462 | 0.000295262 | 0.00454348  |
| 1.507532107 | 0.592188728  | 0.000296083 | 0.004551144 |
| 0.69496206  | -0.524993876 | 0.000297031 | 0.004560744 |



|             |              |             |             |
|-------------|--------------|-------------|-------------|
| 1.625725894 | 0.701084032  | 0.000297799 | 0.004567542 |
| 0.701010242 | -0.512492573 | 0.000301175 | 0.004614305 |
| 0.619716707 | -0.690319233 | 0.000301671 | 0.004616881 |
| 0.33978095  | -1.557323128 | 0.000303106 | 0.004623763 |
| 0.33978095  | -1.557323128 | 0.000303106 | 0.004623763 |
| 0.33978095  | -1.557323128 | 0.000303106 | 0.004623763 |
| 1.45783858  | 0.543830985  | 0.000303449 | 0.004623989 |
| 1.527783358 | 0.611439981  | 0.000305197 | 0.004640581 |
| 1.503557777 | 0.588380307  | 0.000304895 | 0.004640581 |
| 1.457329011 | 0.543326622  | 0.000307838 | 0.004675685 |
| 1.514899938 | 0.599222504  | 0.000308464 | 0.004680137 |
| 1.511180689 | 0.595676171  | 0.000309714 | 0.004694058 |
| 1.476501204 | 0.562182533  | 0.00031445  | 0.004760703 |
| 0.688526928 | -0.538415015 | 0.000314883 | 0.004762148 |
| 1.61727393  | 0.69356406   | 0.000317414 | 0.004795269 |
| 1.474667601 | 0.560389799  | 0.000318295 | 0.004803427 |
| 0.693588007 | -0.527849142 | 0.000322262 | 0.004858086 |
| 1.588391016 | 0.667566106  | 0.000326939 | 0.004923315 |
| 0.725906336 | -0.462144686 | 0.00033013  | 0.004966059 |
| 1.455222033 | 0.541239292  | 0.000331199 | 0.004976822 |
| 2.152345782 | 1.10590987   | 0.000332534 | 0.004989938 |
| 0.635798803 | -0.653357795 | 0.000332781 | 0.004989938 |
| 1.706071048 | 0.770677728  | 0.000334146 | 0.005005082 |
| 1.529514943 | 0.613074201  | 0.000335435 | 0.005019042 |
| 0.722122097 | -0.469685306 | 0.000337365 | 0.005042563 |
| 0.588816233 | -0.764110649 | 0.000339454 | 0.005068409 |
| 3.17847736  | 1.668335812  | 0.000341868 | 0.005099046 |
| 0.676308926 | -0.5642457   | 0.000342994 | 0.005099632 |
| 0.711237762 | -0.491596172 | 0.000342683 | 0.005099632 |
| 1.582614311 | 0.662309708  | 0.000342529 | 0.005099632 |
| 0.506212309 | -0.982185506 | 0.000344421 | 0.005115445 |
| 1.611291237 | 0.688217281  | 0.000345935 | 0.005128414 |
| 0.649463878 | -0.622678806 | 0.000346159 | 0.005128414 |
| 0.700850552 | -0.512821256 | 0.000346387 | 0.005128414 |
| 1.419225273 | 0.505103606  | 0.000352854 | 0.005218682 |
| 0.238946803 | -2.065238629 | 0.000354254 | 0.005233889 |
| 1.4003002   | 0.485736149  | 0.000356118 | 0.005255909 |
| 1.55255708  | 0.63464631   | 0.000357039 | 0.005263995 |
| 0.706592007 | -0.501050666 | 0.000357577 | 0.005266402 |
| 0.696402641 | -0.52200642  | 0.00035992  | 0.005295382 |
| 0.700851745 | -0.512818801 | 0.000363584 | 0.005343692 |
| 1.536573661 | 0.619716929  | 0.000366204 | 0.005373873 |
| 1.560001794 | 0.641547689  | 0.000366782 | 0.005373873 |
| 0.685753141 | -0.54423877  | 0.000366686 | 0.005373873 |
| 0.632276316 | -0.661372916 | 0.000368774 | 0.005397445 |
| 0.695826677 | -0.523200103 | 0.000384434 | 0.005614962 |
| 0.702118583 | -0.510213382 | 0.000384132 | 0.005614962 |
| 1.47220829  | 0.5579818    | 0.000387274 | 0.005639136 |
| 1.418118555 | 0.503978147  | 0.000387032 | 0.005639136 |
| 0.646796625 | -0.628615943 | 0.00038729  | 0.005639136 |
| 1.413400226 | 0.499170045  | 0.000388128 | 0.005645501 |

|             |              |             |             |
|-------------|--------------|-------------|-------------|
| 1.387742734 | 0.47274014   | 0.000388773 | 0.00564904  |
| 1.43435005  | 0.520397154  | 0.000391688 | 0.005674536 |
| 0.645844856 | -0.63074045  | 0.000391544 | 0.005674536 |
| 1.442878474 | 0.528949795  | 0.000392139 | 0.005674536 |
| 0.700814958 | -0.512894526 | 0.000391778 | 0.005674536 |
| 0.592240721 | -0.755744405 | 0.00039499  | 0.00570992  |
| 0.413497219 | -1.274050469 | 0.00039586  | 0.005710766 |
| 0.692050171 | -0.531051463 | 0.000395741 | 0.005710766 |
| 1.440399036 | 0.526468539  | 0.000396882 | 0.00571965  |
| 0.412595839 | -1.277198823 | 0.000401286 | 0.005777206 |
| 0.69067186  | -0.53392765  | 0.000402579 | 0.005785762 |
| 1.408902128 | 0.494571396  | 0.000402825 | 0.005785762 |
| 1.475060785 | 0.560774407  | 0.000403113 | 0.005785762 |
| 1.450199871 | 0.53625175   | 0.000405073 | 0.005807965 |
| 1.428102981 | 0.514100016  | 0.000407114 | 0.005831302 |
| 1.441865289 | 0.527936383  | 0.000409849 | 0.0058645   |
| 1.682539069 | 0.750640005  | 0.000416417 | 0.00595244  |
| 1.536784659 | 0.619915022  | 0.000419083 | 0.005980942 |
| 1.405821209 | 0.491413125  | 0.000419261 | 0.005980942 |
| 0.681479288 | -0.553258285 | 0.000422139 | 0.00600975  |
| 0.698169755 | -0.518350234 | 0.000422561 | 0.00600975  |
| 0.633665622 | -0.658206347 | 0.000421847 | 0.00600975  |
| 4.119414633 | 2.042439346  | 0.000423236 | 0.006013279 |
| 1.584928079 | 0.664417375  | 0.000427111 | 0.006062224 |
| 0.687566456 | -0.540428933 | 0.000429039 | 0.006083451 |
| 1.423314132 | 0.509254107  | 0.00043416  | 0.006149879 |
| 0.680499803 | -0.555333351 | 0.000436993 | 0.006183779 |
| 0.691034684 | -0.533169973 | 0.000440587 | 0.006227287 |
| 0.662035762 | -0.595018944 | 0.000440952 | 0.006227287 |
| 1.417711455 | 0.503563932  | 0.000443312 | 0.006254346 |
| 0.711540817 | -0.490981576 | 0.000444137 | 0.006259712 |
| 0.663388786 | -0.59207347  | 0.000446413 | 0.00628068  |
| 0.722583801 | -0.468763182 | 0.000446517 | 0.00628068  |
| 1.580978724 | 0.660817953  | 0.000449985 | 0.00632314  |
| 0.691829245 | -0.531512094 | 0.000450842 | 0.006328875 |
| 0.714407769 | -0.485180325 | 0.000451334 | 0.006329469 |
| 0.707596886 | -0.499000397 | 0.000453695 | 0.006349932 |
| 0.290383662 | -1.783967812 | 0.000453306 | 0.006349932 |
| 1.475989392 | 0.561682353  | 0.000455703 | 0.006371703 |
| 0.685218951 | -0.545363043 | 0.00045758  | 0.006391591 |
| 0.728683729 | -0.456635318 | 0.000458663 | 0.006400369 |
| 1.441668913 | 0.52773988   | 0.000460065 | 0.00641358  |
| 1.525783849 | 0.609550597  | 0.000463058 | 0.006448924 |
| 0.602224217 | -0.731627371 | 0.000466961 | 0.006495987 |
| 1.446401145 | 0.532467725  | 0.00046736  | 0.006495987 |
| 1.703351373 | 0.76837607   | 0.000471195 | 0.006536379 |
| 1.456703103 | 0.542706866  | 0.000470736 | 0.006536379 |
| 2.054447558 | 1.038750505  | 0.000472802 | 0.006551538 |
| 0.606088296 | -0.72240011  | 0.00047356  | 0.006551538 |
| 0.690080243 | -0.535163965 | 0.000473684 | 0.006551538 |
| 1.638894011 | 0.712722557  | 0.000477615 | 0.006594144 |

|             |              |             |             |
|-------------|--------------|-------------|-------------|
| 0.693979914 | -0.527034188 | 0.000477701 | 0.006594144 |
| 0.707705047 | -0.498779888 | 0.000480889 | 0.006631657 |
| 0.42398441  | -1.237916877 | 0.000484124 | 0.006669726 |
| 1.414614568 | 0.500409023  | 0.000485205 | 0.006678085 |
| 0.711409686 | -0.491247478 | 0.000486374 | 0.006687639 |
| 0.661064129 | -0.597137863 | 0.00048776  | 0.006700153 |
| 1.423662392 | 0.509607066  | 0.000492521 | 0.006752376 |
| 0.69425264  | -0.526467338 | 0.000492334 | 0.006752376 |
| 1.455704851 | 0.541717874  | 0.000495906 | 0.006792175 |
| 1.425153609 | 0.511117428  | 0.000501798 | 0.00685288  |
| 1.667664583 | 0.737829149  | 0.000501666 | 0.00685288  |
| 0.680069562 | -0.556245772 | 0.000501392 | 0.00685288  |
| 0.697909402 | -0.51888326  | 0.000511157 | 0.006973923 |
| 1.896505616 | 0.923343644  | 0.0005119   | 0.006974851 |
| 1.462513975 | 0.548450411  | 0.000512216 | 0.006974851 |
| 1.39015935  | 0.475250265  | 0.000521752 | 0.007097849 |
| 1.460700786 | 0.546660683  | 0.0005254   | 0.007133692 |
| 0.714874431 | -0.484238244 | 0.000525297 | 0.007133692 |
| 1.513138315 | 0.597543869  | 0.000530373 | 0.007194269 |
| 0.597106599 | -0.743939582 | 0.000532724 | 0.007219211 |
| 1.420581158 | 0.506481256  | 0.000535511 | 0.007249997 |
| 0.712296054 | -0.489451097 | 0.000537808 | 0.007274097 |
| 1.62504094  | 0.700476065  | 0.000539033 | 0.00728367  |
| 0.682814604 | -0.550434179 | 0.000546753 | 0.007380903 |
| 0.640499446 | -0.642730772 | 0.000548029 | 0.007388474 |
| 1.522888558 | 0.606810372  | 0.000548363 | 0.007388474 |
| 1.609205562 | 0.68634863   | 0.000555026 | 0.007466762 |
| 1.454786832 | 0.540807773  | 0.000555234 | 0.007466762 |
| 1.467054629 | 0.552922594  | 0.000558237 | 0.00749733  |
| 1.403571058 | 0.489102104  | 0.000558572 | 0.00749733  |
| 0.677301942 | -0.562128963 | 0.000560443 | 0.00751528  |
| 0.70984499  | -0.494424079 | 0.000565618 | 0.007577457 |
| 0.725860746 | -0.462235297 | 0.000567044 | 0.007585525 |
| 0.608897056 | -0.715729756 | 0.000567298 | 0.007585525 |
| 1.439266384 | 0.525333636  | 0.000571495 | 0.007634388 |
| 1.547485074 | 0.629925494  | 0.000578217 | 0.007716863 |
| 3.157793821 | 1.658916978  | 0.000580128 | 0.007735036 |
| 1.462412169 | 0.548349981  | 0.000581427 | 0.007745025 |
| 1.53283176  | 0.616199359  | 0.000584647 | 0.007780559 |
| 1.710369926 | 0.774308391  | 0.000594751 | 0.007907543 |
| 0.461238748 | -1.116414378 | 0.000596206 | 0.00791942  |
| 1.393912202 | 0.479139694  | 0.000597031 | 0.007922904 |
| 1.457311363 | 0.543309151  | 0.000598365 | 0.007925668 |
| 1.423158633 | 0.509096481  | 0.000598138 | 0.007925668 |
| 0.694268542 | -0.526434292 | 0.000601796 | 0.007963619 |
| 0.681054301 | -0.554158265 | 0.000605343 | 0.008003033 |
| 0.679300354 | -0.557878489 | 0.000607225 | 0.008020381 |
| 0.557007444 | -0.844231487 | 0.000609763 | 0.008046357 |
| 0.656837577 | -0.606391431 | 0.000617247 | 0.008137488 |
| 1.450432805 | 0.536483461  | 0.000620152 | 0.008168134 |
| 0.592212375 | -0.755813457 | 0.000621669 | 0.008180465 |

|             |              |             |             |
|-------------|--------------|-------------|-------------|
| 1.803734222 | 0.850986775  | 0.000622869 | 0.0081886   |
| 0.663448604 | -0.591943388 | 0.000627182 | 0.008235056 |
| 1.510773893 | 0.595287758  | 0.000627572 | 0.008235056 |
| 0.724475387 | -0.464991417 | 0.000629332 | 0.008250463 |
| 0.670934495 | -0.575756175 | 0.00063191  | 0.00827655  |
| 0.696910411 | -0.520954888 | 0.000639223 | 0.008364548 |
| 1.460959155 | 0.546915844  | 0.000641766 | 0.008390039 |
| 0.633168354 | -0.659338945 | 0.000643328 | 0.008402658 |
| 1.377470162 | 0.462021068  | 0.000647187 | 0.008445226 |
| 0.549066367 | -0.864947553 | 0.000648637 | 0.008449045 |
| 1.403038632 | 0.488554733  | 0.00064868  | 0.008449045 |
| 0.610589391 | -0.711725573 | 0.000650706 | 0.008467594 |
| 1.467018036 | 0.552886608  | 0.000651659 | 0.008472164 |
| 1.355755961 | 0.439097513  | 0.000657228 | 0.008517913 |
| 0.665607415 | -0.58725659  | 0.000657885 | 0.008517913 |
| 0.572903761 | -0.803635286 | 0.000657844 | 0.008517913 |
| 0.40615031  | -1.29991435  | 0.000656775 | 0.008517913 |
| 1.496082535 | 0.581189767  | 0.000658202 | 0.008517913 |
| 0.701524296 | -0.511435024 | 0.000658897 | 0.008519075 |
| 1.703280675 | 0.768316189  | 0.000659575 | 0.008520014 |
| 1.428884926 | 0.514889735  | 0.000662937 | 0.0085556   |
| 0.626395979 | -0.674853144 | 0.000663829 | 0.008558019 |
| 1.458645179 | 0.544628985  | 0.000664341 | 0.008558019 |
| 2.192974299 | 1.132888904  | 0.000669778 | 0.008620183 |
| 1.469224121 | 0.555054487  | 0.000670532 | 0.008622007 |
| 0.583743196 | -0.776594265 | 0.00067231  | 0.008636978 |
| 0.70829185  | -0.497584153 | 0.000674965 | 0.008663182 |
| 0.093148827 | -3.424318587 | 0.000691372 | 0.008857616 |
| 6.849459944 | 2.775990241  | 0.000691344 | 0.008857616 |
| 0.66598457  | -0.586439343 | 0.000692375 | 0.008862395 |
| 0.711763125 | -0.490530903 | 0.000694759 | 0.008884835 |
| 1.397454257 | 0.48280106   | 0.000697963 | 0.00891771  |
| 0.755919027 | -0.403696391 | 0.000698828 | 0.00892067  |
| 0.690907767 | -0.533434964 | 0.000700916 | 0.008926458 |
| 1.595975666 | 0.674438655  | 0.000699923 | 0.008926458 |
| 1.422571966 | 0.508501638  | 0.000701183 | 0.008926458 |
| 0.734959075 | -0.444264177 | 0.000710019 | 0.009030775 |
| 1.37280525  | 0.457126975  | 0.000720478 | 0.009147271 |
| 1.665709818 | 0.736137092  | 0.000719979 | 0.009147271 |
| 0.687218453 | -0.54115932  | 0.000723387 | 0.009175931 |
| 0.662646603 | -0.593688425 | 0.000725967 | 0.009183836 |
| 0.51993374  | -0.943600317 | 0.000725514 | 0.009183836 |
| 1.641452703 | 0.71497318   | 0.000724681 | 0.009183836 |
| 1.455054639 | 0.541073329  | 0.000728481 | 0.009207376 |
| 0.722984042 | -0.467964292 | 0.000731066 | 0.009231753 |
| 1.415512567 | 0.501324558  | 0.00074036  | 0.009340738 |
| 0.703107526 | -0.508182757 | 0.000742115 | 0.009354497 |
| 1.406823974 | 0.492441826  | 0.000744188 | 0.009372013 |
| 1.362302927 | 0.446047542  | 0.000744835 | 0.009372013 |
| 0.660524914 | -0.598315117 | 0.000748346 | 0.009391011 |
| 0.662033843 | -0.595023125 | 0.000748216 | 0.009391011 |

|             |              |             |             |
|-------------|--------------|-------------|-------------|
| 0.583217057 | -0.777895182 | 0.000748184 | 0.009391011 |
| 1.436363266 | 0.522420662  | 0.000749073 | 0.009391767 |
| 1.377753124 | 0.462317398  | 0.000761926 | 0.00954441  |
| 0.748370873 | -0.418174686 | 0.000765637 | 0.009573857 |
| 1.423622754 | 0.509566897  | 0.000765585 | 0.009573857 |
| 0.258294579 | -1.952910729 | 0.00076671  | 0.009578778 |
| 0.679044935 | -0.558421048 | 0.000768292 | 0.009581536 |
| 1.456341453 | 0.542348649  | 0.000767829 | 0.009581536 |
| 0.662714913 | -0.593539711 | 0.000771046 | 0.009607374 |
| 0.621648179 | -0.685829775 | 0.000775824 | 0.009658353 |
| 0.548868159 | -0.865468447 | 0.000776736 | 0.009661172 |
| 0.687517573 | -0.540531504 | 0.000778816 | 0.009678494 |
| 1.374723355 | 0.459141325  | 0.000779632 | 0.00968009  |
| 0.662542547 | -0.593914992 | 0.000781591 | 0.009695855 |
| 0.719920348 | -0.474090798 | 0.00078611  | 0.009743337 |
| 0.587086822 | -0.768354221 | 0.000788886 | 0.009769144 |
| 1.592412388 | 0.671213999  | 0.000793431 | 0.009808167 |
| 0.240924392 | -2.053347628 | 0.000792934 | 0.009808167 |
| 1.400670151 | 0.48611725   | 0.000799479 | 0.009874271 |
| 1.880820876 | 0.911362457  | 0.00080257  | 0.009903753 |
| 1.442661858 | 0.52873319   | 0.000804016 | 0.009912906 |
| 1.376967412 | 0.461494416  | 0.000805206 | 0.009918902 |
| 0.688938714 | -0.537552444 | 0.000810226 | 0.009972016 |
| 0.691265842 | -0.532687456 | 0.000812341 | 0.009989309 |
| 0.681949801 | -0.552262551 | 0.000813252 | 0.009991792 |
